# Supplementary material for: Cu(ii)/SPDO complex catalyzed asymmetric Baeyer–Villiger oxidation of 2-arylcyclobutanones and its application for the total synthesis of eupomatilones 5 and 6
Source: Royal Society of Chemistry journal article supplement (doi:10.1039/d2sc02079c), 2022-01-01

## [Electronic supplementary information]

### **Cu(II)/SPDO complex-catalyzed asymmetric Baeyer–Villiger oxidation of 2-arylcyclobutanones and its application for the total synthesis of eupomatilones 5 and 6**

Chang-Sheng Zhang,<sup>a</sup> Ya-Ping Shao,<sup>a</sup> Fu-Min Zhang,<sup>\*a</sup> Xue Han,<sup>a</sup> Xiao-Ming Zhang,<sup>a</sup> Kun Zhang,<sup>b</sup> Yong-Qiang Tu,<sup>\*ac</sup>

<sup>a</sup>State Key Laboratory of Applied Organic Chemistry and College of Chemistry and Chemical Engineering, Lanzhou University, Lanzhou 730000, P. R. China.

<sup>b</sup>School of Biotechnology and Health Sciences, Wuyi University, Jiangmen, Guangdong, 529020, P. R. China

<sup>c</sup>School of Chemistry and Chemical Engineering, Shanghai Jiao Tong University, Shanghai, 200240, P. R. China.

E-mail: [tuyq@lzu.edu.cn](mailto:tuyq@lzu.edu.cn) (Y.-Q. Tu); [zhangfm@lzu.edu.cn](mailto:zhangfm@lzu.edu.cn) (F.-M. Zhang)

### **Table of Contents**

|                                                                                                       |           |
|-------------------------------------------------------------------------------------------------------|-----------|
| <b>1. General information.....</b>                                                                    | <b>1</b>  |
| <b>2. Tables for optimization of the reaction conditions.....</b>                                     | <b>2</b>  |
| <b>3. Preparation of Ligands.....</b>                                                                 | <b>3</b>  |
| <b>4. Synthesis of Substituted (phenylmethylene)cyclopropanes.....</b>                                | <b>6</b>  |
| <b>5. General procedure for the synthesis of cyclobutanones a.....</b>                                | <b>11</b> |
| <b>6. [2+2] Synthesis of Heteroaromatic substituted Cyclobutanone.....</b>                            | <b>16</b> |
| <b>7. Synthesis of 2,3-disubstituted Cyclobutanone.....</b>                                           | <b>18</b> |
| <b>8. Characterization of the products and unreacted Cyclobutanone.....</b>                           | <b>19</b> |
| <b>9. Optimization of direct <math>\alpha</math>-arylation of cyclobutanone (Table S4).....</b>       | <b>72</b> |
| <b>10. Synthesis of eupomatilone-5 and eupomatilone-6.....</b>                                        | <b>73</b> |
| <b>11. A possible mechanism for Cu/SPDO catalyzed Baeyer–Villiger oxidation.....</b>                  | <b>83</b> |
| <b>12. References.....</b>                                                                            | <b>84</b> |
| <b>13. X-ray Crystallographic Data.....</b>                                                           | <b>85</b> |
| <b>14. <sup>1</sup>H NMR, <sup>13</sup>C NMR and <sup>19</sup>F NMR Spectra of the Compounds.....</b> | <b>89</b> |

## 1. General information

Unless stated otherwise, all glassware was dried under 110 °C in drying oven, and cooled down to room temperature in an atmosphere of argon. In addition to commercially available extra dry solvents, all solvents were purified by standard operating method. Tetrahydrofuran (THF), toluene, and diethyl ether (Et<sub>2</sub>O) were distilled from sodium; dichloromethane (DCM), 1,2-dichloroethane (DCE) and chloroform (CHCl<sub>3</sub>) were dried by calcium hydride. **Bromoform** (CHBr<sub>3</sub>) was washed by water, dried by K<sub>2</sub>CO<sub>3</sub> and then vacuum distillation under 60 °C/45 mbar. 4Å molecular sieve (M.S.) do not need activation and drying. **3-chloroperoxybenzoic acid (*m*-CPBA)** can be used for the reaction after washing with a phosphate buffer PH = 7.5 solution, and drying the residue under reduced pressure.

All reactions under standard conditions were monitored by thin layer chromatography (TLC) on gel F<sub>254</sub> plates, visualized by ultraviolet light (254 nm). The products were purified by column chromatography on silica gel (200~300 mesh).

<sup>1</sup>H NMR, <sup>13</sup>C NMR and <sup>19</sup>F NMR spectra were obtained from AVANCE III HD 400 or AVANCE NEO 600. Chemical shifts were recorded relative to tetramethylsilane: δ 0.00 or CDCl<sub>3</sub>: 7.26 ppm for <sup>1</sup>H NMR, 77.0 ppm for <sup>13</sup>C NMR; The following abbreviations were used to indicate the multiplicity in NMR spectra: s = singlet; d = doublet; t = triplet; q = quartet; dd = doublet of doublets; td = triplet of doublets; m = multiplet.

High-resolution mass spectral analysis (**HRMS**) data were measured on the Bruker ApexII with ESI resource.

Infrared (**IR**) spectra were recorded on Nicolet is5 spectrometer.

The enantiomeric excesses (**ee**) value of the products was determined by Ultra Performance Convergence Chromatography (UPC<sup>2</sup>) equipped with Waters 2998 Photodiode Array Detector or High Performance Liquid Chromatography (**HPLC**) analysis on the 2998 PDA Detector instruments.

Electron ionization mass (EI-MS) spectra with direct inlet at 70 eV were measured on a Shimadzu GCMSQP2010SE spectrometer, and the corresponding signals were given in m/z with relative intensity (%) in brackets.

The X-ray single-crystal determination was performed on a Bruker APEX II X-ray single crystal diffractometer.

Melting points (m. p.) were measured on a melting point apparatus and were uncorrected.

## 2. Tables for optimization of the reaction conditions

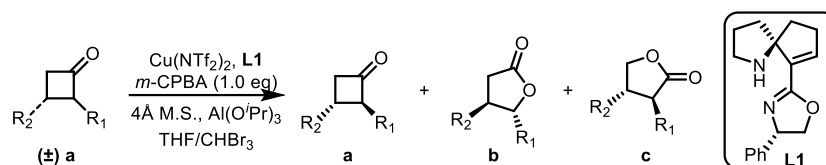

**General procedure:** the mixture of anhydrous  $\text{Cu}(\text{NTf}_2)_2$  (12.5 mg, 0.02 mmol), **L1** (6.4 mg, 0.024 mmol) was stirred in THF (1 mL) for 1 h at room temperature (r. t.). The 4Å molecular sieves (M.S., 60 mg),  $\text{Al}(\text{O}^i\text{Pr})_3$  (20.4 mg, 50% mol) and **1a** was added to an oven-dried reaction tube in batches, then the chiral catalyst solution prepared beforehand, THF (1 mL) and  $\text{CHBr}_3$  (2 mL) were added, the reaction mixture was cooled to  $-40\text{ }^\circ\text{C}$  for 20 min. Then, the *m*-CPBA (0.2 mmol) was added to the reaction mixture at  $-40\text{ }^\circ\text{C}$ . The  $\text{Na}_2\text{SO}_3$  (126 mg, 1.0 mmol) was added after the reaction mixture had been stirred for the time indicated at  $-40\text{ }^\circ\text{C}$ , and stirred for additional 2 h at  $-40\text{ }^\circ\text{C}$ . The DCM (10 mL) was added, the solution was extracted with DCM. The combined organic layers were washed with brine, dried ( $\text{NaSO}_4$ ), concentrated and the crude product was purified by flash column chromatography on silica gel at  $-15\text{ }^\circ\text{C}$  to afford the desired lactones **b/c** and recover the unreacted ketones **a**.

**Table S1: Investigation of the Ligands when  $\text{Cu}(\text{NTf}_2)_2$  as Lewis acid<sup>a</sup>.**

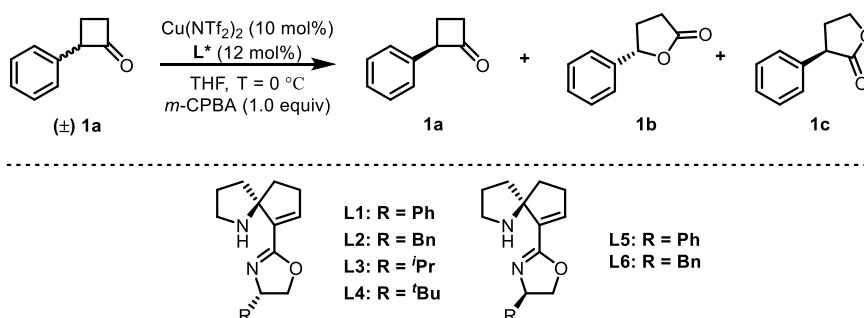

| entry | ligand    | Time/h | <b>a</b> : yield/% <sup>b</sup><br>ee/% <sup>c</sup> | <b>b+c</b> : yield/% <sup>b</sup><br><b>c</b> : ee/% <sup>c</sup> | rs <sup>d</sup><br><b>1b/1c</b> |
|-------|-----------|--------|------------------------------------------------------|-------------------------------------------------------------------|---------------------------------|
| 1     | <b>L1</b> | 10     | 29/92                                                | 70/63                                                             | 4.7/1                           |
| 2     | <b>L2</b> | 18     | 48/35                                                | 50/45                                                             | 3.8/1                           |
| 3     | <b>L3</b> | 18     | 39/24                                                | 58/33                                                             | 3.5/1                           |
| 4     | <b>L4</b> | 36     | 57/2                                                 | 40/3                                                              | 1.6/1                           |
| 5     | <b>L5</b> | 18     | 47/-7                                                | 46/-31                                                            | 1.8/1                           |
| 6     | <b>L6</b> | 18     | 42/28                                                | 52/32                                                             | 3.0/1                           |

<sup>a</sup> Reaction conditions: **1a** (0.2 mmol),  $\text{Cu}(\text{NTf}_2)_2$  (10 mol%), Ligand (12 mol%) and *m*-CPBA (1.0 equiv) in THF (2.0 mL) at  $0\text{ }^\circ\text{C}$  for indicated time. <sup>b</sup> Isolated yield. <sup>c</sup> Determined by UPC<sup>2</sup> analysis. <sup>d</sup> The regioselectivity of **b/c** was determined by crude  $^1\text{H}$  NMR.

**Table S2: Investigation of the component solvent<sup>a</sup>.**

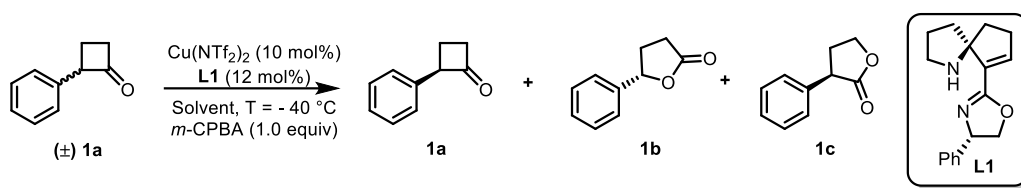

| entry | Solvent              | Time/h | <b>a</b> : yield/% <sup>b</sup><br>ee/% <sup>c</sup> | <b>b+c</b> : yield/% <sup>b</sup><br><b>b</b> : ee/% <sup>c</sup> | rs <sup>d</sup><br><b>1b/1c</b> |
|-------|----------------------|--------|------------------------------------------------------|-------------------------------------------------------------------|---------------------------------|
| 1     | THF                  | 48     | 53/43                                                | 44/79                                                             | 6.1/1                           |
| 2     | THF/DCM              | 36     | 56/70                                                | 41/89                                                             | 19/1                            |
| 3     | THF/DCE              | 32     | 55/66                                                | 43/80                                                             | 18/1                            |
| 4     | THF/ $\text{CHCl}_3$ | 36     | 56/70                                                | 41/85                                                             | 19/1                            |
| 5     | THF/ $\text{CHBr}_3$ | 36     | 54/72                                                | 45/92                                                             | 15/1                            |

<sup>a</sup> Reaction conditions: **1a** (0.2 mmol),  $\text{Cu}(\text{NTf}_2)_2$  (10 mol%), Ligand (12 mol%) and *m*-CPBA (1.0 equiv) in component solvent (4.0 mL) at  $-40^\circ\text{C}$  for indicated time. <sup>b</sup> Isolated yield. <sup>c</sup> Determined by UPC<sup>2</sup> analysis. <sup>d</sup> The regioselectivity (rs) of **b/c** was determined by crude <sup>1</sup>H NMR.

**Table S3: Investigation of the Additives<sup>a</sup>.**

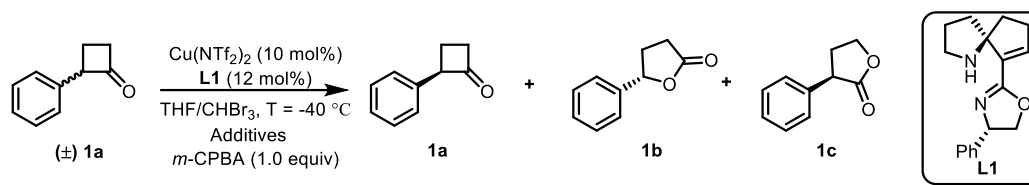

| entry | additives                                                    | Time /h | <b>a</b> : yield/% <sup>b</sup><br>ee/% <sup>c</sup> | <b>b+c</b> : yield/% <sup>b</sup><br><b>b</b> : ee/% <sup>c</sup> | rs<br><b>1b/1c</b> |
|-------|--------------------------------------------------------------|---------|------------------------------------------------------|-------------------------------------------------------------------|--------------------|
| 1     | 3Å M.S. <sup>e</sup>                                         | 36      | 51/68                                                | 46/89                                                             | 16.9/1             |
| 2     | 4Å M.S. <sup>e</sup>                                         | 36      | 51/66                                                | 46/94                                                             | 14.8/1             |
| 3     | 5Å M.S. <sup>e</sup>                                         | 30      | 43/65                                                | 55/87                                                             | 19.1/1             |
| 4     | 4Å M.S. <sup>e</sup> , 2,4,6-tris(1-methylethyl)benzoic acid | 36      | 48/68                                                | 50/94                                                             | 16.1/1             |
| 5     | 4Å M.S. <sup>e</sup> , $\text{Al}(\text{OEt})_3$             | 36      | 50/78                                                | 46/90                                                             | 11.0/1             |
| 6     | 4Å M.S. <sup>e</sup> , $\text{Al}(\text{O}^i\text{Pr})_3$    | 36      | 43/91                                                | 52/92                                                             | 12.5/1             |
| 7     | 4Å M.S. <sup>e</sup> , $\text{Al}(\text{O}^t\text{Bu})_3$    | 72      | 55/55                                                | 40/90                                                             | 15.0/1             |
| 8     | 4Å M.S. <sup>e</sup> , $\text{NaBAr}^{\text{Ff}}$            | 10      | 40/25                                                | 54/41                                                             | >20/1              |

<sup>a</sup> Reaction conditions: **1a** (0.2 mmol),  $\text{Cu}(\text{NTf}_2)_2$  (10 mol%), Ligand (12 mol%) and *m*-CPBA (1.0 equiv) in THF/ $\text{CHBr}_3$  (2 mL/2 mL) at  $-40^\circ\text{C}$  for indicated time. <sup>b</sup> Isolated yield. <sup>c</sup> Determined by UPC<sup>2</sup> analysis. <sup>d</sup> The regioselectivity of **c/d** was determined by crude <sup>1</sup>H NMR. <sup>e</sup> M.S.: 60 mg. <sup>f</sup>  $\text{NaBAr}^{\text{F}}$  = Sodium tetrakis[3,5-bis(trifluoromethyl)phenyl]borate

### 3. Preparation of Ligands.

General procedure for Ligands **L1-L6** according to the literature.<sup>1</sup>



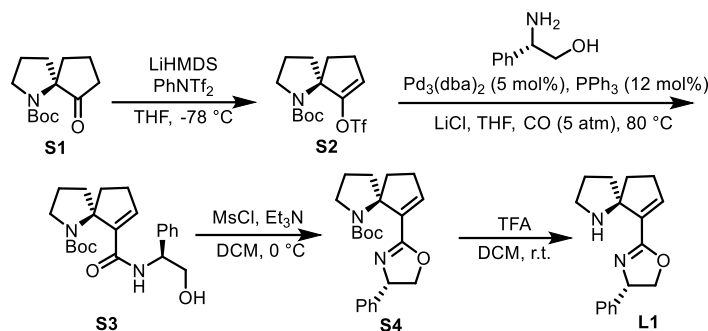

**Scheme S1.** General procedure for Ligands **L1**

#### Preparation of **L1**:

**S2**: **S1** (1.0 g, 4.18 mmol) was dissolved in dry THF (42 mL) under argon atmosphere at room temperature and then cooled down to  $-78\text{ }^{\circ}\text{C}$ . Lithium bis(trimethylsilyl)amide (1.0 M in THF, 4.6 mL, 1.1 equiv) was added dropwise via a syringe. The resulted solution was stirred at  $-78\text{ }^{\circ}\text{C}$  for 1 h. And then *N,N*-Bis(trifluoromethylsulfonyl)aniline (1.64 g, 4.6 mmol, 1.1 equiv) was added portionwise and the reaction mixture was stirred at room temperature for additional 4 h. Then the reaction mixture was quenched by the addition of saturated  $\text{NH}_4\text{Cl}$  aqueous solution (10 mL) after full conversion, and the resultant mixture was extracted with EtOAc. The combined organic layers were washed again with brine, dried ( $\text{NaSO}_4$ ) and concentrated to give crude product **S2** which can be used in the next step without further purification.

**S4**: To a solution of **S2** in dry THF (10 mL) was added  $\text{Pd}_2\text{dba}_3$  (191 mg, 0.21 mmol, 5 mol%),  $\text{PPh}_3$  (131 mg, 0.5 mmol, 12 mol%),  $\text{LiCl}$  (532 mg, 12.5 mmol, 3.0 equiv), (*S*)-2-Phenylglycinol (1.26 g, 4.4 mmol, 2.0 equiv). And then the reaction mixture stirred under CO (5 atm) at  $80\text{ }^{\circ}\text{C}$  for 12 h, filtered through celite and concentrated under vacuum to give crude product **S3**. To a solution of crude product in dry DCM (21 mL) at  $0\text{ }^{\circ}\text{C}$ ,  $\text{Et}_3\text{N}$  (2.9 mL, 20.9 mmol, 5.0 equiv),  $\text{MsCl}$  (0.97 mL, 12.5 mmol, 3.0 equiv). The reaction mixture was stirred for 5 h at room temperature, then quenched with saturated  $\text{NH}_4\text{Cl}$  aqueous solution, and the resultant mixture was extracted with EtOAc three times. The combined organic layers were washed again with brine, dried ( $\text{NaSO}_4$ ) and concentrated to give crude product **S4**.

**L1**: To a solution of products in dry DCM (31 mL), was added TFA (3.1 mL, 41.8 mmol, 10.0 equiv), and stirred for 5 h. The reaction mixture was concentrated under vacuum and then diluted with DCM, neutralized with saturated  $\text{K}_2\text{CO}_3$  aqueous solution, and the resultant mixture was extracted with DCM three times. The combined organic layers were washed again with brine, dried ( $\text{NaSO}_4$ ), concentrated to give crude products. The crude products were purified directly by column chromatography on silica gel (DCM: MeOH = 30:1 as eluent with 1%  $\text{Et}_3\text{N}$ ) to afford the desired products **L1-L6**.

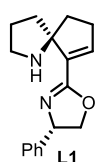

#### (*S*)-4-phenyl-2-((*R*)-1-azaspiro [4.4] non-6-en-6-yl)-4,5-dihydrooxazole (**L1**)

This compound was synthesized according to the procedure above, 70% yield, colorless liquid.

$[\alpha]_D^{27} = -13.0$  ( $c = 1.0$ ,  $\text{CHCl}_3$ ).

$^1\text{H NMR}$  (400 MHz,  $\text{CDCl}_3$ )  $\delta$  7.37-7.31 (m, 2H), 7.31-7.24 (m, 1H), 7.23-7.17 (m, 2H), 6.69 (t,  $J = 2.6$  Hz, 1H), 5.27 (dd,  $J = 10.0, 8.0$  Hz, 1H), 4.57 (dd,  $J = 9.8, 8.2$  Hz, 1H), 4.44 (s, 1H), 4.00 (t,  $J = 8.2$  Hz, 1H), 3.22-3.12 (m, 1H), 2.97-2.88 (m, 1H), 2.64-2.52 (m, 1H), 2.49-2.37 (m, 1H), 2.18-2.05 (m, 2H), 2.01-1.81 (m, 3H), 1.81-1.73 (m, 1H).

$^{13}\text{C}$  NMR (100 MHz,  $\text{CDCl}_3$ )  $\delta$  160.9, 142.3, 142.0, 133.8, 128.5, 127.3, 126.2, 74.8, 73.2, 69.6, 46.0, 38.9, 35.7, 30.1, 25.4.

**HRMS** (ESI) calculated For  $\text{C}_{17}\text{H}_{20}\text{N}_2\text{O}$  [ $\text{M}+\text{H}^+$ ]: 269.1648, found 269.1647.

**FT-IR** ( $\text{cm}^{-1}$ ): 3355, 2958, 1656, 1598, 1384, 1023, 700.

**MS** (EI)  $m/z$  (%): 226 (100), 107 (32), 120 (20), 269 (15), 134 (10), 147 (4).

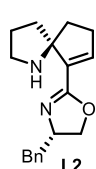

**(S)-4-benzyl-2-((R)-1-azaspiro[4.4]non-6-en-6-yl)-4,5-dihydrooxazole (L2)**

This compound was synthesized according to the procedure above, 60% yield, colorless liquid.

$[\alpha]^{16}_{\text{D}} = -26.0$  ( $c = 1.0$ ,  $\text{CHCl}_3$ ).

$^1\text{H}$  NMR (600 MHz,  $\text{CDCl}_3$ )  $\delta$  7.29 (t,  $J = 7.2$  Hz, 2H), 7.22 (t,  $J = 7.5$  Hz, 1H), 7.19 (d,  $J = 7.2$  Hz, 2H), 6.59 (t,  $J = 2.7$  Hz, 1H), 5.39 (br, 1H), 4.45 (p,  $J = 7.7$  Hz, 1H), 4.19 (t,  $J = 8.7$  Hz, 1H), 3.97 (dd,  $J = 8.4, 7.2$  Hz, 1H), 3.20-3.13 (m, 1H), 3.07-3.01 (m, 1H), 2.98 (dd,  $J = 13.5, 6.3$  Hz, 1H), 2.72 (dd,  $J = 13.5, 7.5$  Hz, 1H), 2.60-2.52 (m, 1H), 2.45-2.36 (m, 1H), 2.24-2.17 (m, 1H), 2.09-2.01 (m, 1H), 2.00-1.94 (m, 2H), 1.94-1.87 (m, 1H), 1.78-1.73 (m, 1H).

$^{13}\text{C}$  NMR (100 MHz,  $\text{CDCl}_3$ )  $\delta$  160.1, 141.0, 138.0, 134.9, 129.3, 128.4, 126.4, 74.6, 70.2, 67.8, 46.5, 41.78, 39.8, 35.8, 30.1, 25.9.

**HRMS** (ESI) calculated for  $\text{C}_{18}\text{H}_{23}\text{N}_2\text{O}$  [ $\text{M}+\text{H}^+$ ]: 283.1805, found: 283.1803.

**FT-IR** ( $\text{cm}^{-1}$ ): 3395, 2957, 1657, 1599, 1453, 1386, 1051, 925, 754, 703.

**MS** (EI)  $m/z$  (%): 240 (100), 241 (18), 120 (15), 148 (14), 191 (13), 163 (7), 282 (4), 267 (3).

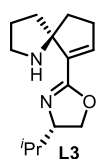

**(S)-4-isopropyl-2-((R)-1-azaspiro[4.4]non-6-en-6-yl)-4,5-dihydrooxazole (L3)**

This compound was synthesized according to the procedure above, 45% yield, colorless liquid.

$[\alpha]^{28}_{\text{D}} = -34.0$  ( $c = 1.0$ ,  $\text{CHCl}_3$ ).

$^1\text{H}$  NMR (600 MHz,  $\text{CDCl}_3$ )  $\delta$  6.59 (t,  $J = 2.7$  Hz, 1H), 5.84 (br, 1H), 4.28-4.17 (m, 1H), 4.03-3.92 (m, 2H), 3.29-3.20 (m, 1H), 3.17-3.09 (m, 1H), 2.64-2.54 (m, 1H), 2.47-2.38 (m, 1H), 2.38-2.28 (m, 1H), 2.09-1.88 (m, 4H), 1.84-1.68 (m, 2H), 0.93 (d,  $J = 6.6$  Hz, 3H), 0.89 (d,  $J = 7.2$  Hz, 3H).

$^{13}\text{C}$  NMR (150 MHz,  $\text{CDCl}_3$ )  $\delta$  159.7, 141.6, 132.8, 75.6, 72.0, 69.1, 46.0, 38.2, 35.7, 32.8, 30.2, 25.2, 18.5, 18.4.

**HRMS** (ESI) calculated for  $\text{C}_{14}\text{H}_{23}\text{N}_2\text{O}$  [ $\text{M}+\text{H}^+$ ]: 235.1805, found: 235.1804.

**FT-IR** ( $\text{cm}^{-1}$ ): 3407, 2958, 2871, 1660, 1600, 1465, 1384, 1102, 1027, 924.

**MS** (EI)  $m/z$  (%): 192 (100), 120 (48), 148 (28), 191 (20), 163 (10).

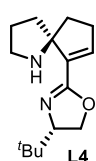

**(S)-4-(tert-butyl)-2-((R)-1-azaspiro[4.4]non-6-en-6-yl)-4,5-dihydrooxazole (L4)**

This compound was synthesized according to the procedure above, 35% yield, colorless liquid.

$[\alpha]^{17}_{\text{D}} = -37.0$  ( $c = 1.0$ ,  $\text{CHCl}_3$ ).

$^1\text{H}$  NMR (600 MHz,  $\text{CDCl}_3$ )  $\delta$  6.55 (t,  $J = 2.4$  Hz, 1H), 5.07 (br, 1H), 4.14 (dd,  $J = 9.9, 8.7$  Hz, 1H), 4.04 (dd,  $J = 8.4, 7.8$  Hz, 1H), 3.92 (dd,  $J = 10.2, 7.8$  Hz, 1H), 3.22 (dt,  $J = 11.0, 6.8$  Hz, 1H), 3.03-2.97 (m, 1H), 2.59-2.51 (m, 1H), 2.44-2.36 (m, 1H), 2.20-2.13 (m, 1H), 2.06-1.99 (m, 1H), 1.99-1.92 (m, 2H), 1.92-1.85 (m, 1H), 1.78-1.71 (m, 1H), 0.88 (s, 9H).

$^{13}\text{C}$  NMR (150 MHz,  $\text{CDCl}_3$ )  $\delta$  159.5, 140.9, 133.9, 75.7, 75.1, 67.3, 46.4, 39.2, 36.0, 33.9, 30.1, 25.8.

**HRMS** (ESI) calculated for  $\text{C}_{15}\text{H}_{25}\text{N}_2\text{O}$  [ $\text{M}+\text{H}^+$ ]: 249.1961, found: 249.1971.

**FT-IR** ( $\text{cm}^{-1}$ ): 3415, 2956, 1661, 1601, 1384, 1363, 771.

**MS** (EI)  $m/z$  (%): 206 (100), 120 (48), 148 (28), 191 (20), 163 (13), 233 (5), 248 (5), 234 (6), 219 (5).

**(R)-4-phenyl-2-((R)-1-azaspiro [4.4] non-6-en-6-yl)-4,5-dihydrooxazole (L5)**

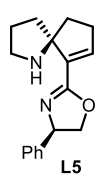

This compound was synthesized according to the procedure above, 70% yield, colorless liquid.

$[\alpha]^{27}_D = +44.0$  ( $c = 1.0$ ,  $\text{CHCl}_3$ ).

$^1\text{H NMR}$  (600 MHz,  $\text{CDCl}_3$ )  $\delta$  7.37-7.32 (m, 2H), 7.30-7.26 (m, 1H), 7.24-7.20 (m, 2H), 6.72 (t,  $J = 3.0$  Hz, 1H), 5.25 (t,  $J = 9.3$  Hz, 1H), 4.81-4.65 (br, 1H), 4.60 (dd,  $J = 9.9, 8.1$  Hz, 1H), 4.02 (t,  $J = 8.4$  Hz, 1H), 3.26-3.16 (m, 1H), 3.05-2.97 (m, 1H), 2.66-2.56 (m, 1H), 2.51-2.41 (m, 1H), 2.26-2.14 (m, 1H), 2.06-1.97 (m, 2H), 1.97-1.84 (m, 2H), 1.80-1.73 (m, 1H).

$^{13}\text{C NMR}$  (150 MHz,  $\text{CDCl}_3$ )  $\delta$  161.3, 142.5, 141.9, 133.3, 128.8, 127.6, 126.6, 75.3, 73.6, 70.0, 46.1, 38.5, 35.5, 30.2, 25.1.

**HRMS** (ESI) calculated for  $\text{C}_{17}\text{H}_{21}\text{N}_2\text{O}$   $[\text{M}+\text{H}^+]$ : 269.1648, found 269.1646.

**FT-IR** ( $\text{cm}^{-1}$ ): 3284, 2959, 1656, 1598, 1452, 1384, 1260, 1023, 699.

**MS** (EI)  $m/z$  (%): 226 (100), 107 (32), 120 (20), 269 (15), 134 (10), 147 (4).

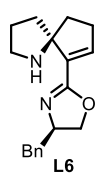

**(R)-4-benzyl-2-((R)-1-azaspiro[4.4]non-6-en-6-yl)-4,5-dihydrooxazole (L6)**

This compound was synthesized according to the procedure above, 55% yield, colorless liquid.

$[\alpha]^{28}_D = +54.0$  ( $c = 1.0$ ,  $\text{CHCl}_3$ ).

$^1\text{H NMR}$  (600 MHz,  $\text{CDCl}_3$ )  $\delta$  7.34-7.29 (m, 2H), 7.25-7.22 (m, 1H), 7.22-7.18 (m, 2H), 6.62 (t,  $J = 2.4$  Hz, 1H), 5.98 (br, 1H), 4.42 (p,  $J = 7.8$  Hz, 1H), 4.21 (dd,  $J = 9.0, 8.4$  Hz, 1H), 3.97 (dd,  $J = 8.4, 7.8$  Hz, 1H), 3.22-3.16 (m, 1H), 3.16-3.10 (m, 1H), 3.04 (dd,  $J = 13.5, 6.3$  Hz, 1H), 2.71 (dd,  $J = 13.8, 8.4$  Hz, 1H), 2.63-2.55 (m, 1H), 2.47-2.39 (m, 1H), 2.35-2.27 (m, 1H), 2.02-1.87 (m, 4H), 1.79-1.71 (m, 1H).

$^{13}\text{C NMR}$  (150 MHz,  $\text{CDCl}_3$ )  $\delta$  160.2, 142.2, 137.9, 132.6, 129.1, 128.5, 126.5, 75.6, 70.8, 67.7, 45.7, 41.7, 37.8, 35.4, 30.2, 24.8.

**HRMS** (ESI) calculated for  $\text{C}_{18}\text{H}_{23}\text{N}_2\text{O}$   $[\text{M}+\text{H}^+]$ : 283.1805, found: 283.1801.

**FT-IR** ( $\text{cm}^{-1}$ ): 3283, 2958, 1657, 1598, 1453, 1386, 1022, 703.

**MS** (EI)  $m/z$  (%): 240 (100), 241 (18), 120 (15), 148 (14), 191 (13), 163 (7), 282 (4), 267 (3).

#### 4. Synthesis of Substituted (phenylmethylene)cyclopropanes<sup>2</sup>

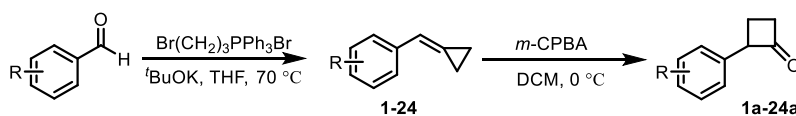

The substrate **1** was synthesized according to the literature.<sup>2</sup>

##### General procedure for the synthesis of (phenylmethylene)cyclopropanes **1**

To a solution of (3-bromopropyl) triphenyl phosphonium bromide (5.1 g, 11.0 mmol, 1.1 equiv) in dry THF (35 mL) under argon atmosphere at 0 °C, a solution of Potassium tert-butoxide (22 ml, 22 mmol, 2.2 equiv) in THF (1 M) was added dropwise and then stirred at 70 °C for 1 h. Then a THF solution of benzaldehyde (10 mmol, 1.06 g, 1.0 equiv, 2.0 M in THF) was added dropwise at 0 °C and the mixture was refluxed again for 1 h. After full conversion, the mixture was cooled down to room temperature, layered with petroleum ether (50 mL) and the suspension filtered over celite washing thoroughly with petroleum ether. The filtrate was concentrated and the residue purified by chromatography on silica gel eluting with petroleum ether and ethyl acetate to afford various (phenylmethylene)cyclopropanes.

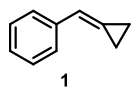

This compound was synthesized according to the procedure above, 94% yield, colorless liquid.

**<sup>1</sup>H NMR** (400 MHz, CDCl<sub>3</sub>) δ 7.53 (d, *J* = 7.6 Hz, 2H), 7.32 (t, *J* = 7.6 Hz, 2H), 7.28-7.12 (m, 1H), 6.74 (s, 1H), 1.48-1.34 (m, 2H), 1.26-1.08 (m, 2H).

**<sup>13</sup>C NMR** (100 MHz, CDCl<sub>3</sub>) δ 138.2, 128.4, 126.7, 126.6, 124.3, 118.2, 4.2, 0.5.

**HRMS** (ESI) calculated for C<sub>10</sub>H<sub>11</sub> [M+H<sup>+</sup>]: 131.0855; found: 131.0854.

**FT-IR** (cm<sup>-1</sup>) 3060, 2975, 1764, 1451, 740, 694, 509.

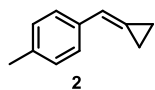

This compound was synthesized according to the procedure above, 96% yield, colorless liquid.

**<sup>1</sup>H NMR** (600 MHz, CDCl<sub>3</sub>) δ 7.46-7.39 (m, 2H), 7.12 (d, *J* = 7.8 Hz, 2H), 6.71 (t, *J* = 2.1 Hz, 1H), 2.33 (s, 3H), 1.42-1.36 (m, 2H), 1.18-1.12 (m, 2H).

**<sup>13</sup>C NMR** (150 MHz, CDCl<sub>3</sub>) δ 136.3, 135.5, 129.1, 126.5, 123.0, 118.0, 21.2, 4.1, 0.5.

**HRMS** (ESI) calculated for C<sub>11</sub>H<sub>13</sub> [M+H<sup>+</sup>]: 145.1012; found: 145.1005.

**FT-IR** (cm<sup>-1</sup>): 3444, 3005, 2921, 1782, 1704, 1513, 1176, 1020, 812, 514.

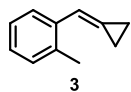

This compound was synthesized according to the procedure above, 88% yield, colorless liquid.

**<sup>1</sup>H NMR** (400 MHz, CDCl<sub>3</sub>) δ 7.73 (d, *J* = 8.0 Hz, 1H), 7.20-7.06 (m, 3H), 6.95 (p, *J* = 2.1 Hz, 1H), 2.38 (s, 3H), 1.42-1.35 (m, 2H), 1.19-1.12 (m, 2H).

**<sup>13</sup>C NMR** (100 MHz, CDCl<sub>3</sub>) δ 136.5, 134.8, 130.2, 126.6, 125.8, 125.8, 124.9, 115.4, 19.7, 4.1, 0.8.

**HRMS** (ESI) calculated for C<sub>11</sub>H<sub>13</sub> [M+H<sup>+</sup>]: 145.1012; found: 145.1011.

**FT-IR** (cm<sup>-1</sup>): 3444, 3003, 2917, 1777, 1704, 1510, 1173, 810, 517.

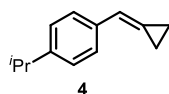

This compound was synthesized according to the procedure above, 76% yield, yellow liquid.

**<sup>1</sup>H NMR** (600 MHz, CDCl<sub>3</sub>) δ 7.46 (d, *J* = 8.4 Hz, 2H), 7.19 (d, *J* = 8.4 Hz, 2H), 6.74-6.70 (m, 1H), 2.89 (hept, *J* = 6.9 Hz, 1H), 1.42-1.37 (m, 2H), 1.25 (d, *J* = 6.6 Hz, 6H), 1.18-1.13 (m, 2H).

**<sup>13</sup>C NMR** (150 MHz, CDCl<sub>3</sub>) δ 147.4, 135.9, 126.6, 126.5, 123.2, 118.0, 33.8, 24.0, 4.1, 0.5.

**HRMS** (ESI) calculated for C<sub>13</sub>H<sub>17</sub> [M+H<sup>+</sup>]: 173.1325; found: 173.1325.

**FT-IR** (cm<sup>-1</sup>): 2959, 2869, 1785, 1769, 1512, 1459, 1054, 844, 549.

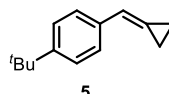

This compound was synthesized according to the procedure above, 91% yield, white solid, m. p.: 51-53 °C.

**<sup>1</sup>H NMR** (600 MHz, CDCl<sub>3</sub>) δ 7.50-7.44 (m, 2H), 7.38-7.33 (m, 2H), 6.72 (p, *J* = 2.1 Hz, 1H), 1.42-1.38 (m, 2H), 1.32 (s, 9H), 1.18-1.14 (m, 2H).

**<sup>13</sup>C NMR** (150 MHz, CDCl<sub>3</sub>) δ 149.6, 135.5, 126.3, 125.3, 123.3, 117.9, 34.5, 31.3, 4.1, 0.5.

**HRMS** (ESI) calculated for C<sub>14</sub>H<sub>19</sub> [M+H<sup>+</sup>]: 187.1481; found: 187.1479.

**FT-IR** (cm<sup>-1</sup>): 3466, 2963, 2868, 1783, 1363, 1268, 1108, 843, 571.

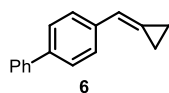

This compound was synthesized according to the procedure above, 89% yield, white solid, m. p.: 64-68 °C.

**<sup>1</sup>H NMR** (600 MHz, CDCl<sub>3</sub>) δ 7.67-7.53 (m, 6H), 7.46-7.39 (m, 2H), 7.35-3.30 (m, 1H), 6.19 (p, *J* = 2.0 Hz, 1H), 1.50-1.39 (m, 2H), 1.25-1.12 (m, 2H).

**<sup>13</sup>C NMR** (150 MHz, CDCl<sub>3</sub>) δ 140.9, 139.4, 137.3, 128.7, 127.1, 127.1, 127.0, 126.9, 124.6, 117.9, 4.2, 0.6.

**HRMS** (ESI) calculated for C<sub>16</sub>H<sub>15</sub> [M+H<sup>+</sup>]: 207.1168; found: 207.1169.

**FT-IR** (cm<sup>-1</sup>): 3437, 3031, 2972, 1486, 1426, 847, 757, 692, 493.

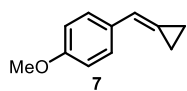

This compound was synthesized according to the procedure above, 92% yield, yellow liquid.

**<sup>1</sup>H NMR** (400 MHz, CDCl<sub>3</sub>) δ 7.45 (d, *J* = 8.4 Hz, 2H), 6.90-6.81 (m, 2H), 6.68 (t, *J* = 2.0 Hz, 1H), 3.77 (s, 3H), 1.41-1.31 (m, 2H), 1.19-1.06 (m, 2H).

**<sup>13</sup>C NMR** (100 MHz, CDCl<sub>3</sub>) δ 158.5, 131.1, 127.6, 121.5, 117.5, 113.8, 55.1, 3.9, 0.4.

**HRMS** (ESI) calculated for C<sub>11</sub>H<sub>12</sub>NaO [M+Na<sup>+</sup>]: 183.0780, found: 183.0779.

**FT-IR** (cm<sup>-1</sup>): 3467, 3000, 2836, 1718, 1608, 1511, 1441, 1249, 1173, 1033, 838, 541.

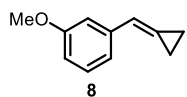

This compound was synthesized according to the procedure above, 93% yield, yellow liquid.

**<sup>1</sup>H NMR** (400 MHz, CDCl<sub>3</sub>) δ 7.24 (t, *J* = 8.0 Hz, 1H), 7.11 (d, *J* = 8.0 Hz, 2H), 6.80-6.74 (m, 1H), 6.72 (t, *J* = 1.8 Hz, 1H), 3.81 (s, 3H), 1.46-1.37 (m, 2H), 1.21-1.12 (m, 2H).

**<sup>13</sup>C NMR** (100 MHz, CDCl<sub>3</sub>) δ 159.7, 139.7, 129.3, 124.7, 119.4, 118.1, 112.2, 111.9, 55.1, 4.2, 0.5.

**HRMS** (ESI) calculated for C<sub>11</sub>H<sub>12</sub>NaO [M+Na<sup>+</sup>]: 183.0780, found: 183.0786.

**FT-IR** (cm<sup>-1</sup>): 2956, 2834, 1780, 1735, 1598, 1490, 1263, 1155, 1043, 774, 690.

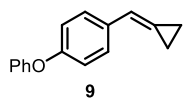

This compound was synthesized according to the procedure above, 83% yield, yellow liquid.

**<sup>1</sup>H NMR** (400 MHz, CDCl<sub>3</sub>) δ 7.49 (d, *J* = 8.8 Hz, 2H), 7.40-7.27 (m, 2H), 7.08 (t, *J* = 7.4 Hz, 1H), 7.04-6.92 (m, 4H), 6.72 (t, *J* = 1.8 Hz, 1H), 1.44-1.32 (m, 2H), 1.21-1.07 (m, 2H).

**<sup>13</sup>C NMR** (100 MHz, CDCl<sub>3</sub>) δ 157.4, 155.9, 133.6, 129.7, 127.8, 123.2, 123.1, 119.0, 118.6, 117.4, 4.0, 0.5.

**HRMS** (ESI) calculated for C<sub>16</sub>H<sub>15</sub>O [M+H<sup>+</sup>]: 223.1117, found: 223.1124.

**FT-IR** (cm<sup>-1</sup>): 3447, 3039, 1782, 1588, 1488, 1240, 1165, 871, 692.

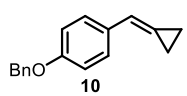

This compound was synthesized according to the procedure above, 94% yield, white solid, m. p.: 67-70 °C.

**<sup>1</sup>H NMR** (600 MHz, CDCl<sub>3</sub>) δ 7.48-7.44 (m, 2H), 7.44-7.41 (m, 2H), 7.39-7.35 (m, 2H), 7.34-7.28 (m, 1H), 6.98-6.89 (m, 2H), 6.68 (t, *J* = 2.1 Hz, 1H), 5.05 (s, 2H), 1.44-1.31 (m, 2H), 1.14 (m, 2H).

**<sup>13</sup>C NMR** (150 MHz, CDCl<sub>3</sub>) δ 157.7, 137.0, 131.4, 128.5, 127.9, 127.7, 127.4, 121.8, 117.5, 114.8, 70.0, 4.0, 0.5.

**HRMS** (ESI) calculated for C<sub>17</sub>H<sub>16</sub>NaO [M+Na<sup>+</sup>]: 259.1093, found: 259.1084.

**FT-IR** (cm<sup>-1</sup>): 3437, 2968, 1606, 1510, 1249, 1012, 837, 741, 695, 529.

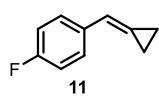

This compound was synthesized according to the procedure above, 77% yield, colorless liquid.

**<sup>1</sup>H NMR** (400 MHz, CDCl<sub>3</sub>) δ 7.52-7.41 (m, 2H), 7.05-6.93 (m, 2H), 6.69 (p, *J* = 2.0 Hz, 1H), 1.42-1.29 (m, 2H), 1.24-1.10 (m, 2H).

**<sup>13</sup>C NMR** (100 MHz, CDCl<sub>3</sub>) δ 161.8 (d, *J* = 244 Hz), 134.4 (d, *J* = 3.4 Hz), 127.9 (d, *J* = 7.9 Hz), 123.8 (d, *J* = 2.6 Hz), 117.1, 115.2 (d, *J* = 21.4 Hz), 4.0, 0.5.

**<sup>19</sup>F NMR** (376 MHz, CDCl<sub>3</sub>) δ -115.73.

**HRMS** (ESI) calculated for C<sub>10</sub>H<sub>10</sub>F [M+H<sup>+</sup>]: 149.0761, found: 149.0760.

**FT-IR** (cm<sup>-1</sup>): 3075, 2926, 1765, 1600, 1509, 1226, 1157, 836.

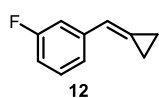

This compound was synthesized according to the procedure above, 72% yield, colorless liquid.

**<sup>1</sup>H NMR** (400 MHz, CDCl<sub>3</sub>) δ 7.27-7.19 (m, 3H), 6.92-6.83 (m, 1H), 6.70 (s, 1H), 1.45-1.34 (m, 2H), 1.23-1.09 (m, 2H).

**<sup>13</sup>C NMR** (100 MHz, CDCl<sub>3</sub>) δ 163.1 (d, *J* = 242.9 Hz), 140.5 (d, *J* = 7.6 Hz), 129.8 (d, *J* = 8.4 Hz), 126.0, 122.45 (d, *J* = 2.6 Hz), 117.3 (d, *J* = 2.7 Hz), 113.4 (d, *J* = 21.4 Hz), 112.8 (d, *J* = 21.6 Hz), 4.2, 0.6.

**<sup>19</sup>F NMR** (376 MHz, CDCl<sub>3</sub>) δ -113.76.

**HRMS** (ESI) calculated for C<sub>10</sub>H<sub>10</sub>F [M+H<sup>+</sup>]: 149.0761, found: 149.0760.

**FT-IR** (cm<sup>-1</sup>): 3073, 2925, 1761, 1590, 1523, 1488, 1448, 1250, 1162, 1142, 785.

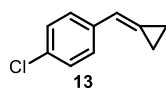

This compound was synthesized according to the procedure above, 79% yield, colorless liquid.

**<sup>1</sup>H NMR** (600 MHz, CDCl<sub>3</sub>) δ 7.42 (d, *J* = 8.4 Hz, 2H), 7.26 (d, *J* = 8.4 Hz, 2H),

6.68 (t, *J* = 1.8 Hz 1H), 1.44-1.32 (m, 2H), 1.26-1.12 (m, 2H).

**<sup>13</sup>C NMR** (150 MHz, CDCl<sub>3</sub>) δ 136.7, 132.2, 128.5, 127.7, 125.1, 117.2, 4.1, 0.6.

**HRMS** (ESI) calculated for C<sub>10</sub>H<sub>10</sub>Cl [M+H<sup>+</sup>] 165.0466, found: 165.0465.

**FT-IR** (cm<sup>-1</sup>): 3466, 2925, 1743, 1491, 1091, 1014, 831.

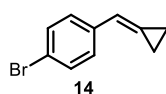

This compound was synthesized according to the procedure above, 91% yield, white solid, m. p.: 50-53 °C.

**<sup>1</sup>H NMR** (600 MHz, CDCl<sub>3</sub>) δ 7.42 (d, *J* = 8.4 Hz, 2H), 7.37 (d, *J* = 8.4 Hz, 2H),

6.68 (p, *J* = 2.1 Hz, 1H), 1.45-1.34 (m, 2H), 1.23-1.11 (m, 2H).

**<sup>13</sup>C NMR** (150 MHz, CDCl<sub>3</sub>) δ 137.1, 131.5, 128.1, 125.3, 120.3, 117.2, 4.2, 0.6.

**HRMS** (ESI) calculated for C<sub>10</sub>H<sub>10</sub>Br [M+H<sup>+</sup>]: 208.9960, 210.9940, found: 208.9960, 210.9942.

**FT-IR** (cm<sup>-1</sup>): 3455, 3044, 2967, 1745, 1486, 1401, 1105, 840, 511.

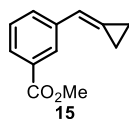

This compound was synthesized according to the procedure above, 77% yield, yellow liquid.

**<sup>1</sup>H NMR** (600 MHz, CDCl<sub>3</sub>) δ 8.16 (s, 1H), 7.87 (d, *J* = 7.8 Hz, 1H), 7.73 (d, *J* = 7.8 Hz, 1H), 7.38 (t, *J* = 7.8 Hz, 1H), 6.678 (p, *J* = 1.8 Hz, 1H), 3.92 (s, 3H), 1.56-1.39 (m, 2H),

1.23-1.16 (m, 2H).

**<sup>13</sup>C NMR** (150 MHz, CDCl<sub>3</sub>) δ 167.2, 138.5, 130.7, 130.3, 128.4, 127.7, 127.7, 125.9, 117.4, 52.1, 4.2, 0.6.

**HRMS** (ESI) calculated for C<sub>12</sub>H<sub>13</sub>O<sub>2</sub> [M+H<sup>+</sup>]: 189.0910, found: 189.0909.

**FT-IR** (cm<sup>-1</sup>): 2976, 2950, 1723, 1445, 1292, 1204, 1107, 747.

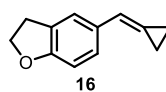

This compound was synthesized according to the procedure above, 92% yield, orange solid, m. p.: 80-83 °C.

**<sup>1</sup>H NMR** (400 MHz, CDCl<sub>3</sub>) δ 7.42 (s, 1H), 7.26 (d, *J* = 8.0 Hz, 1H), 6.75 (d, *J* = 8.0

Hz, 1H), 6.68 (*J* = 2.0 Hz, 1H), 4.57 (t, *J* = 8.8 Hz, 2H), 3.21 (t, *J* = 8.8 Hz, 3H), 1.46-1.33 (m, 2H),

1.23-1.06 (m, 2H).

**<sup>13</sup>C NMR** (100 MHz, CDCl<sub>3</sub>) δ 159.1, 131.2, 127.2, 126.8, 122.8, 120.9, 117.9, 109.1, 71.3, 29.7, 4.1, 0.5.

**HRMS** (ESI) calculated for C<sub>12</sub>H<sub>13</sub>O [M+H<sup>+</sup>]: 173.0961, found: 173.0961.

**FT-IR** (cm<sup>-1</sup>): 3437, 2967, 2895, 1607, 1492, 1237, 937, 826, 804, 425.

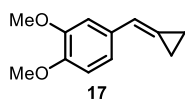

This compound was synthesized according to the procedure above, 91% yield, yellow solid, m. p.: 61-64 °C.

**<sup>1</sup>H NMR** (600 MHz, CDCl<sub>3</sub>) δ 7.14 (d, *J* = 1.8 Hz, 1H), 7.03 (dd, *J* = 8.1, 2.1 Hz,

1H), 6.83 (d, *J* = 7.8 Hz, 1H), 6.68 (p, *J* = 2.1 Hz, 1H), 3.89 (s, 3H), 3.87 (s, 3H), 1.43-1.36 (m, 2H),

1.19-1.14 (m, 2H).

$^{13}\text{C}$  NMR (150 MHz,  $\text{CDCl}_3$ )  $\delta$  148.9, 148.0, 131.5, 121.8, 119.3, 117.7, 111.0, 109.2, 55.8, 55.6, 3.8, 0.4.

HRMS (ESI) calculated for  $\text{C}_{12}\text{H}_{14}\text{NaO}_2$  [ $\text{M}+\text{Na}^+$ ]: 213.0886, found: 213.0881.

FT-IR ( $\text{cm}^{-1}$ ): 3443, 2968, 2835, 1779, 1514, 1264, 1232, 1138, 1026.

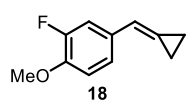

This compound was synthesized according to the procedure above, 98% yield, colorless liquid.

$^1\text{H}$  NMR (600 MHz,  $\text{CDCl}_3$ )  $\delta$  7.31 (dd,  $J = 12.6, 1.8$  Hz, 1H), 7.14 (d,  $J = 8.4$  Hz, 1H), 6.89 (t,  $J = 8.7$  Hz, 1H), 6.63 (s, 1H), 3.86 (s, 3H), 1.40-1.34 (m, 2H), 1.18-1.13 (m, 2H).

$^{13}\text{C}$  NMR (150 MHz,  $\text{CDCl}_3$ )  $\delta$  152.5 (d,  $J = 161.9$  Hz), 146.4 (d,  $J = 10.8$  Hz), 132.0 (d,  $J = 6.8$  Hz), 123.3, 122.6 (d,  $J = 3.0$  Hz), 116.8 (d,  $J = 2.0$  Hz), 113.5 (d,  $J = 19.1$  Hz), 113.2, 56.2, 3.9, 0.5.

$^{19}\text{F}$  NMR (376 MHz,  $\text{CDCl}_3$ )  $\delta$  -135.66.

HRMS (ESI) calculated for  $\text{C}_{11}\text{H}_{12}\text{FO}$  [ $\text{M}+\text{H}^+$ ]: 179.0867, found: 179.0860.

FT-IR ( $\text{cm}^{-1}$ ): 3048, 2976, 1784, 1490, 1090, 1068, 841, 511.

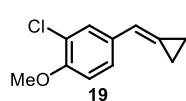

This compound was synthesized according to the procedure above, 98% yield, yellow liquid.

$^1\text{H}$  NMR (400 MHz,  $\text{CDCl}_3$ )  $\delta$  7.56 (d,  $J = 2.0$  Hz, 1H), 7.32 (dd,  $J = 8.6, 2.2$  Hz, 1H), 6.86 (d,  $J = 8.4$  Hz, 1H), 6.62 (t,  $J = 2.0$  Hz, 1H), 3.88 (s, 3H), 1.54-1.34 (m, 2H), 1.25-1.04 (m, 2H).

$^{13}\text{C}$  NMR (100 MHz,  $\text{CDCl}_3$ )  $\delta$  153.7, 132.1, 127.9, 125.9, 123.3, 122.5, 116.5, 111.9, 56.1, 4.0, 0.5.

HRMS (ESI) calculated for  $\text{C}_{11}\text{H}_{12}\text{ClO}$  [ $\text{M}+\text{H}^+$ ]: 195.0571, found: 195.0573.

FT-IR ( $\text{cm}^{-1}$ ): 2974, 1600, 1500, 1281, 1258, 1062, 1023, 819.

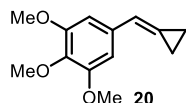

This compound was synthesized according to the procedure above, 96% yield, yellow solid, m. p.: 64-67 °C.

$^1\text{H}$  NMR (400 MHz,  $\text{CDCl}_3$ )  $\delta$  6.78 (s, 2H), 6.66 (p,  $J = 2.0$  Hz, 1H), 3.88 (s, 6H), 3.85 (s, 3H), 1.45-1.37 (m, 2H), 1.22-1.15 (m, 2H).

$^{13}\text{C}$  NMR (100 MHz,  $\text{CDCl}_3$ )  $\delta$  153.1, 137.0, 134.0, 123.5, 118.0, 103.5, 60.8, 55.9, 3.9, 0.4.

HRMS (ESI) calculated for  $\text{C}_{13}\text{H}_{16}\text{NaO}_3$  [ $\text{M}+\text{Na}^+$ ]: 243.0992, found: 243.0983.

FT-IR ( $\text{cm}^{-1}$ ): 2966, 2835, 1583, 1506, 1415, 1236, 1129, 1005, 842.

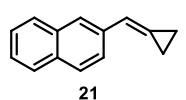

This compound was synthesized according to the procedure above, 89.3% yield, yellow solid, m. p.: 64-69 °C.

$^1\text{H}$  NMR (400 MHz,  $\text{CDCl}_3$ )  $\delta$  7.88-7.71 (m, 5H), 7.48-7.35 (m, 2H), 6.91 (t,  $J = 1.8$  Hz, 1H), 1.57-1.43 (m, 2H), 1.28-1.14 (m, 2H).

$^{13}\text{C}$  NMR (100 MHz,  $\text{CDCl}_3$ )  $\delta$  135.9, 133.7, 132.6, 127.9, 127.9, 127.6, 126.0, 125.7, 125.4, 124.9, 124.5, 118.5, 4.4, 0.7.

HRMS (ESI) calculated for  $\text{C}_{14}\text{H}_{13}$  [ $\text{M}+\text{H}^+$ ]: 181.1012, found: 181.1012.

FT-IR ( $\text{cm}^{-1}$ ): 3051, 2969, 970, 900, 860, 739, 478.

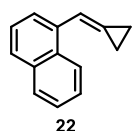

This compound was synthesized according to the procedure above, 89% yield, yellow liquid.

$^1\text{H}$  NMR (400 MHz,  $\text{CDCl}_3$ )  $\delta$  8.19 (d,  $J = 8.4$  Hz, 1H), 7.87-7.78 (m, 2H), 7.71 (d,  $J = 8.0$  Hz, 1H), 7.53-7.40 (m, 4H), 1.41-1.37 (m, 2H), 1.28-1.18 (m, 2H).

$^{13}\text{C}$  NMR (100 MHz,  $\text{CDCl}_3$ )  $\delta$  134.6, 133.8, 131.0, 128.5, 127.1, 126.7, 125.7, 125.5, 125.5, 123.8, 123.5, 114.6, 4.1, 1.5.

HRMS (ESI) calculated for  $\text{C}_{14}\text{H}_{13}$  [ $\text{M}+\text{H}^+$ ]: 181.1012, found: 181.1011.

FT-IR ( $\text{cm}^{-1}$ ): 3404, 3056, 2971, 1554, 1360, 970, 907, 860, 743, 471.

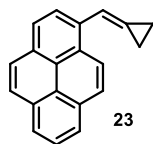

This compound was synthesized according to the procedure above, 82% yield, yellow solid, m. p.: 126-129 °C.

**<sup>1</sup>H NMR** (400 MHz, CDCl<sub>3</sub>) δ 8.42 (d, *J* = 8.8 Hz, 1H), 8.10 (t, *J* = 7.8 Hz, 3H), 8.04 (d, *J* = 9.2 Hz, 1H), 7.98 (s, 2H), 7.94 (t, *J* = 7.6 Hz, 1H), 7.79 (t, *J* = 1.8 Hz, 1H),

1.61-1.51 (m, 2H), 1.36-1.28 (m, 2H).

**<sup>13</sup>C NMR** (100 MHz, CDCl<sub>3</sub>) δ 132.1, 131.5, 130.9, 130.1, 127.6, 127.5, 127.3, 127.2, 126.8, 125.8, 125.0, 125.0, 125.0, 124.7, 124.1, 122.9, 115.0, 4.5, 1.4.

**HRMS** (ESI) calculated for C<sub>20</sub>H<sub>15</sub> [M+H<sup>+</sup>]: 255.1168, found: 255.1166.

**FT-IR** (cm<sup>-1</sup>): 3439, 3039, 2968, 1600, 1260, 843, 796, 711.

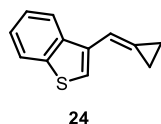

This compound was synthesized according to the procedure above, 87% yield, yellow liquid.

**<sup>1</sup>H NMR** (600 MHz, CDCl<sub>3</sub>) δ 7.96 (d, *J* = 8.4 Hz, 1H), 7.84 (dt, *J* = 8.0, 0.9 Hz, 1H), 7.53 (s, 1H), 7.41-7.37 (m, 1H), 7.36-7.31 (m, 1H), 7.07 (p, *J* = 2.0 Hz, 1H), 1.42-

1.37 (m, 2H), 1.30-1.26 (m, 2H).

**<sup>13</sup>C NMR** (150 MHz, CDCl<sub>3</sub>) δ 140.2, 137.9, 134.1, 125.3, 124.3, 124.0, 122.8, 121.8, 120.8, 110.5, 4.2, 2.1.

**HRMS** (ESI) calculated for C<sub>12</sub>H<sub>11</sub>S [M+H<sup>+</sup>]: 188.0576, found: 187.0580.

**FT-IR** (cm<sup>-1</sup>) 3426, 3009, 1615, 1265, 841, 797, 762, 711, 732, 421.

## 5. General procedure for the synthesis of cyclobutanones a<sup>3</sup>

To a solution of (cyclopropylidene)methylbenzene (1.04 g, 8 mmol, 1.0 equiv) in DCM (80 mL, 0.1 M) at 0 °C was added a DCM (27 mL, 0.3 M) solution of *m*-CPBA (1.62 g, 85%, 8 mmol, 1.0 equiv) dropwise and stirred for 2-8 h. After full conversion, the solution was diluted with a saturated solution of aqueous Na<sub>2</sub>SO<sub>3</sub> (15 mL) and extracted with DCM three times. The combined organic layers were washed successively with a saturated solution of aqueous Na<sub>2</sub>CO<sub>3</sub> three times and brine, dried over Na<sub>2</sub>SO<sub>4</sub> and concentrated in vacuum. The crude products were purified directly by column chromatography on silica gel with a mixture of petroleum ether and ethyl acetate to give various cyclobutanones.

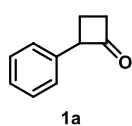

This compound was synthesized according to the procedure above, 65% yield, colorless liquid.

**<sup>1</sup>H NMR** (400 MHz, CDCl<sub>3</sub>) δ 7.31-7.22 (m, 2H), 7.22-7.09 (m, 3H), 4.53-4.39 (m, 1H), 3.24-3.06 (m, 1H), 3.03-2.87 (m, 1H), 2.46 (qd, *J* = 10.7, 4.9 Hz, 1H), 2.25-2.03 (m, 1H).

**<sup>13</sup>C NMR** (100 MHz, CDCl<sub>3</sub>) δ 207.8, 136.4, 128.6, 126.9, 126.9, 64.5, 44.8, 17.6.

**HRMS** (ESI) calculated for C<sub>10</sub>H<sub>10</sub>NaO [M+Na<sup>+</sup>]: 169.0624, found: 169.0624.

**FT-IR** (cm<sup>-1</sup>) 3027, 2962, 1781, 1495, 1070, 1031, 746, 697.

**MS** (EI) *m/z* (%): 104 (100), 105 (32), 103 (20), 117 (16), 115 (13), 146 (5)

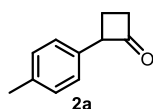

This compound was synthesized according to the procedure above, 64% yield, colorless liquid.

**<sup>1</sup>H NMR** (400 MHz, CDCl<sub>3</sub>) δ 7.10 (s, 4H), 4.49-4.36 (m, 1H), 3.20-3.07 (m, 1H), 3.01-2.88 (m, 1H), 2.44 (qd, *J* = 10.6, 4.9 Hz, 1H), 2.29 (s, 3H), 2.13 (m, 1H).

**<sup>13</sup>C NMR** (100 MHz, CDCl<sub>3</sub>) δ 207.7, 136.3, 133.4, 129.0, 126.6, 64.0, 44.5, 20.8, 17.5.

**HRMS** (ESI) calculated for C<sub>11</sub>H<sub>12</sub>NaO [M+Na<sup>+</sup>]: 183.0780, found: 183.0784.

**FT-IR** (cm<sup>-1</sup>): 2923, 1781, 1514, 1070, 812, 476.



**MS** (EI)  $m/z$  (%): 118 (100), 117 (65), 119 (40), 61 (36), 91 (30), 70 (30), 132 (7), 160 (3).

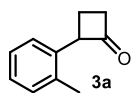

This compound was synthesized according to the procedure above, 77% yield, colorless liquid.

**$^1\text{H NMR}$**  (400 MHz,  $\text{CDCl}_3$ )  $\delta$  7.28-7.23 (m, 1H), 7.19-7.11 (m, 3H), 4.72-4.59 (m, 1H), 3.25-3.13 (m, 1H), 3.07-2.96 (m, 1H), 2.51 (qd,  $J = 10.7, 5.0$  Hz, 1H), 2.30 (s, 3H), 2.21-2.09 (m, 1H).  
 **$^{13}\text{C NMR}$**  (100 MHz,  $\text{CDCl}_3$ )  $\delta$  208.2, 135.9, 135.2, 130.4, 127.0, 126.0, 62.5, 44.5, 19.7, 17.7.

**HRMS** (ESI) calculated for  $\text{C}_{11}\text{H}_{12}\text{NaO}$  [ $\text{M}+\text{Na}^+$ ]: 183.0780, found: 183.0782.

**FT-IR** ( $\text{cm}^{-1}$ ): 2917, 1777, 1514, 1075, 810, 513, 477.

**MS** (EI)  $m/z$  (%): 118 (100), 117 (65), 119 (40), 61 (36), 91 (30), 70 (30), 132 (7), 160 (3).

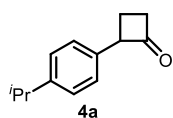

This compound was synthesized according to the procedure above, 89% yield, colorless liquid.

**$^1\text{H NMR}$**  (400 MHz,  $\text{CDCl}_3$ )  $\delta$  7.23-7.13 (m, 4H), 4.55-4.44 (m, 1H), 3.28-3.13 (m, 1H), 3.09-2.94 (m, 1H), 2.88 (hept,  $J = 6.9$  Hz, 1H), 2.51 (qd,  $J = 10.6, 5.0$  Hz, 1H), 2.28-2.15 (m, 1H), 1.23 (d,  $J = 7.2$  Hz, 6H).

**$^{13}\text{C NMR}$**  (100 MHz,  $\text{CDCl}_3$ )  $\delta$  208.1, 147.6, 133.8, 126.9, 126.7, 64.3, 44.8, 33.7, 23.9, 17.7.

**HRMS** (ESI) calculated for  $\text{C}_{13}\text{H}_{17}\text{O}$  [ $\text{M}+\text{H}^+$ ]: 189.1274, found: 189.1277.

**FT-IR** ( $\text{cm}^{-1}$ ): 2961, 2871, 1782, 1683, 1605, 1183, 1056, 826.

**MS** (EI)  $m/z$  (%): 131 (100), 146 (78), 91 (23), 145 (23), 115 (21), 117 (19), 188 (3).

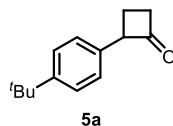

This compound was synthesized according to the procedure above, 78% yield, white solid, m. p.: 42-45 °C.

**$^1\text{H NMR}$**  (400 MHz,  $\text{CDCl}_3$ )  $\delta$  7.41-7.29 (m, 2H), 7.18 (d,  $J = 8.4$  Hz, 2H), 4.55-4.44 (m, 1H), 3.27-3.13 (m, 1H), 3.09-2.95 (m, 1H), 2.50 (qd,  $J = 10.6, 5.0$  Hz, 1H), 2.30-2.15 (m, 1H), 1.30 (s, 9H).

**$^{13}\text{C NMR}$**  (100 MHz,  $\text{CDCl}_3$ )  $\delta$  208.1, 149.8, 133.4, 126.6, 125.5, 64.2, 44.8, 34.4, 31.3, 17.7.

**HRMS** (ESI) calculated for  $\text{C}_{14}\text{H}_{18}\text{NaO}$  [ $\text{M}+\text{Na}^+$ ]: 225.1250, found: 225.1253.

**FT-IR** ( $\text{cm}^{-1}$ ): 2962, 2868, 1784, 1512, 1070, 826, 574.

**MS** (EI)  $m/z$  (%): 145 (100), 160 (24), 146 (22), 117 (18), 115 (12), 131 (8), 202 (2).

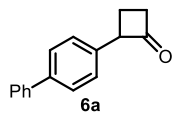

This compound was synthesized according to the procedure above, 72% yield, white solid, m. p.: 86-87 °C.

**$^1\text{H NMR}$**  (400 MHz,  $\text{CDCl}_3$ )  $\delta$  7.60-7.51 (m, 4H), 7.47-7.38 (m, 2H), 7.36-7.28 (m, 3H), 4.66-4.46 (m, 1H), 3.34-3.15 (m, 1H), 3.12-2.94 (m, 1H), 2.55 (qd,  $J = 10.6, 5.0$  Hz, 1H), 2.35-2.15 (m, 1H).

**$^{13}\text{C NMR}$**  (100 MHz,  $\text{CDCl}_3$ )  $\delta$  207.7, 140.7, 139.9, 135.4, 128.7, 127.3, 127.3, 127.2, 127.0, 64.2, 44.9, 17.7.

**HRMS** (ESI) calculated for  $\text{C}_{16}\text{H}_{14}\text{NaO}$  [ $\text{M}+\text{Na}^+$ ]: 245.0937, found: 245.0937.

**FT-IR** ( $\text{cm}^{-1}$ ): 3431, 3011, 2977, 1770, 1405, 1074, 833, 744, 688.

**MS** (EI)  $m/z$  (%): 180 (100), 181 (54), 152 (43), 165 (38), 178 (33), 179 (25), 115 (18), 194 (10), 198 (8), 222 (7).

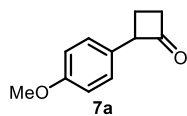

This compound was synthesized according to the procedure above, 68% yield, yellow liquid.

**$^1\text{H NMR}$**  (600 MHz,  $\text{CDCl}_3$ )  $\delta$  7.15 (d,  $J = 8.4$  Hz, 2H), 6.86 (d,  $J = 9.0$  Hz, 2H), 4.46 (m, 1H), 3.77 (s, 3H), 3.25-3.15 (m, 1H), 3.05-2.96 (m, 1H), 2.50 (qd,  $J = 10.8, 4.8$  Hz, 1H), 2.21-2.12 (m, 1H).

**$^{13}\text{C NMR}$**  (100 MHz,  $\text{CDCl}_3$ )  $\delta$  208.3, 158.5, 128.7, 128.0, 114.0, 63.8, 55.2, 44.6, 17.9.

**HRMS** (ESI) calculated for  $C_{11}H_{12}NaO_2$  [ $M+Na^+$ ]: 199.0730, found: 199.0725.

**FT-IR** ( $cm^{-1}$ ): 2959, 2836, 1781, 1513, 1282, 1248, 1178, 1072, 828.

**MS** (EI)  $m/z$  (%): 134 (100), 91 (43), 119 (30), 135 (28), 77 (25), 61 (22), 147 (17), 176 (4).

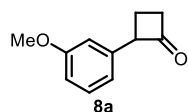

This compound was synthesized according to the procedure above, 70% yield, yellow liquid.

**$^1H$  NMR** (400 MHz,  $CDCl_3$ )  $\delta$  7.24 (t,  $J = 7.8$  Hz, 1H), 6.89-6.73 (m, 3H), 4.56-4.41 (m, 1H), 3.78 (s, 3H), 3.27-3.12 (m, 1H), 3.09-2.92 (m, 1H), 2.50 (qd,  $J = 10.6, 5.0$  Hz, 1H), 2.30-2.13 (m, 1H).

**$^{13}C$  NMR** (100 MHz,  $CDCl_3$ )  $\delta$  207.5, 159.7, 137.9, 129.5, 119.1, 112.6, 112.2, 64.3, 55.1, 44.7, 17.5.

**HRMS** (ESI) calculated for  $C_{11}H_{12}NaO_2$  [ $M+Na^+$ ]: 199.0730, found: 199.0726.

**FT-IR** ( $cm^{-1}$ ): 2961, 2836, 1780, 1600, 1491, 1251, 1154, 1071, 783, 694.

**MS** (EI)  $m/z$  (%): 134 (100), 135 (45), 91 (33), 77 (22), 176 (7).

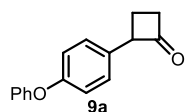

This compound was synthesized according to the procedure above, 63% yield, yellow liquid.

**$^1H$  NMR** (400 MHz,  $CDCl_3$ )  $\delta$  7.36-7.28 (m, 2H), 7.24-7.17 (m, 2H), 7.14-7.06 (m, 1H), 7.02-6.93 (m, 4H), 4.62-4.39 (m, 1H), 3.35-3.15 (m, 1H), 3.10-2.93 (m, 1H), 2.54 (qd,  $J = 10.6, 5.0$  Hz, 1H), 2.29-2.12 (m, 1H).

**$^{13}C$  NMR** (100 MHz,  $CDCl_3$ )  $\delta$  207.9, 157.2, 156.1, 131.3, 129.7, 128.3, 123.2, 119.0, 118.7, 63.9, 44.8, 17.9.

**HRMS** (ESI) calculated for  $C_{16}H_{14}NaO_2$  [ $M+Na^+$ ]: 261.0886, found: 261.0888.

**FT-IR** ( $cm^{-1}$ ): 3062, 1782, 1588, 1506, 1488, 1238, 1071, 868, 755, 693.

**MS** (EI)  $m/z$  (%): 196 (100), 77 (46), 117 (25), 135 (25), 115 (23), 197 (22), 210 (7), 238 (3).

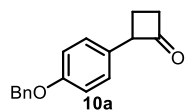

This compound was synthesized according to the procedure above, 63% yield, white solid, m. p.: 56-57 °C.

**$^1H$  NMR** (400 MHz,  $CDCl_3$ )  $\delta$  7.45-7.34 (m, 4H), 7.33 (m, 1H), 7.18-7.13 (m, 2H), 7.00-6.84 (m, 2H), 5.04 (s, 2H), 4.56-4.37 (m, 1H), 3.33-3.12 (m, 1H), 3.07-2.93 (m, 1H), 2.51 (qd,  $J = 10.6, 4.9$  Hz, 1H), 2.28-2.07 (m, 1H).

**$^{13}C$  NMR** (100 MHz,  $CDCl_3$ )  $\delta$  208.4, 157.7, 136.9, 128.9, 128.5, 128.0, 127.9, 127.4, 114.9, 69.9, 63.8, 44.7, 18.0.

**HRMS** (ESI) calculated for  $C_{17}H_{16}NaO_2$  [ $M+Na^+$ ]: 275.1043, found: 275.1034.

**FT-IR** ( $cm^{-1}$ ): 3535, 3033, 2870, 1780, 1609, 1511, 1244, 1201, 1072, 826, 698.

**MS** (EI)  $m/z$  (%): 91 (100), 65 (12), 92 (7), 77 (6), 90 (6), 210 (6), 252 (2).

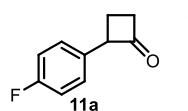

This compound was synthesized according to the procedure above, 85% yield, colorless liquid.

**$^1H$  NMR** (400 MHz,  $CDCl_3$ )  $\delta$  7.20 (dd,  $J = 8.4, 5.6$  Hz, 2H), 7.08-6.91 (m, 2H), 4.69-4.34 (m, 1H), 3.31-3.11 (m, 1H), 3.10-2.90 (m, 1H), 2.53 (qd,  $J = 10.8, 4.8$  Hz, 1H), 2.31-2.08 (m, 1H).

**$^{13}C$  NMR** (100 MHz,  $CDCl_3$ )  $\delta$  207.5, 161.7 (d,  $J = 243.7$  Hz), 132.2 (d,  $J = 3.2$  Hz), 128.4 (d,  $J = 7.9$  Hz), 115.4 (d,  $J = 21.3$  Hz), 63.5, 44.7, 17.8.

**$^{19}F$  NMR** (376 MHz,  $CDCl_3$ )  $\delta$  -115.67.

**HRMS** (ESI) calculated for  $C_{10}H_{10}FO$  [ $M+H^+$ ]: 165.0710, found: 161.0702.

**FT-IR** ( $cm^{-1}$ ): 3540, 2963, 2928, 1783, 1602, 1510, 1224, 1098, 1072, 831.

**MS** (EI)  $m/z$  (%): 122 (100), 121 (18), 135 (12), 108 (12), 96 (12), 164 (4).

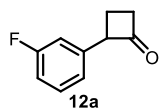

This compound was synthesized according to the procedure above, 67% yield, colorless liquid.

**<sup>1</sup>H NMR** (400 MHz, CDCl<sub>3</sub>) δ 7.33-7.22 (m, 1H), 7.05-6.87 (m, 3H), 4.67-4.40 (m, 1H), 3.34-3.15 (m, 1H), 3.15-2.91 (m, 1H), 2.53 (qd, *J* = 10.8, 5.0 Hz, 1H), 2.35-1.98 (m, 1H).  
**<sup>13</sup>C NMR** (100 MHz, CDCl<sub>3</sub>) δ 206.7, 162.8 (d, *J* = 244.7 Hz), 138.7 (d, *J* = 7.5 Hz), 130.0 (d, *J* = 8.3 Hz), 122.5 (d, *J* = 2.9 Hz), 113.9 (d, *J* = 11.2 Hz), 113.7 (d, *J* = 10.3 Hz), 63.8 (d, *J* = 1.7 Hz), 44.8, 17.4.

**<sup>19</sup>F NMR** (376 MHz, CDCl<sub>3</sub>) δ -112.83.

**HRMS** (ESI) calculated for C<sub>10</sub>H<sub>10</sub>FO [M+H<sup>+</sup>]: 165.0710, found: 165.0705.

**FT-IR** (cm<sup>-1</sup>): 3073, 2927, 1782, 1588, 1444, 1247, 1147, 787.

**MS** (EI) *m/z* (%): 122 (100), 121 (15), 96 (13), 135 (8), 164 (5).

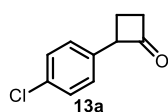

This compound was synthesized according to the procedure above, 77% yield, colorless liquid.

**<sup>1</sup>H NMR** (600 MHz, CDCl<sub>3</sub>) δ 7.32-7.26 (m, 2H), 7.21-7.15 (m, 2H), 4.54-4.44 (m, 1H), 3.29-3.18 (m, 1H), 3.05-2.95 (m, 1H), 2.53 (qd, *J* = 10.5, 5.0 Hz, 1H), 2.25-2.11 (m, 1H).  
**<sup>13</sup>C NMR** (150 MHz, CDCl<sub>3</sub>) δ 207.0, 134.8, 132.7, 128.6, 128.2, 63.6, 44.8, 17.6.

**HRMS** (ESI) calculated for C<sub>10</sub>H<sub>10</sub>ClO [M+H<sup>+</sup>]: 181.0415, found: 181.0414.

**FT-IR** (cm<sup>-1</sup>): 3541, 2962, 1784, 1491, 1397, 1199, 1069, 1030, 821.

**MS** (EI) *m/z* (%): 138 (100), 140 (35), 103 (26), 115 (20), 89 (18), 180 (3), 182 (1).

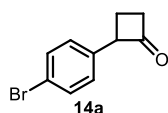

This compound was synthesized according to the procedure above, 63% yield, white solid, m. p.: 37-40 °C.

**<sup>1</sup>H NMR** (400 MHz, CDCl<sub>3</sub>) δ 7.54-7.36 (m, 2H), 7.23-7.05 (m, 2H), 4.55-4.38 (m, 1H), 3.32-3.15 (m, 1H), 3.08-2.94 (m, 1H), 2.52 (qd, *J* = 10.7, 4.9 Hz, 1H), 2.28-2.08 (m, 1H).  
**<sup>13</sup>C NMR** (100 MHz, CDCl<sub>3</sub>) δ 206.8, 135.3, 131.6, 128.6, 120.7, 63.6, 44.8, 17.5.

**FT-IR** (cm<sup>-1</sup>): 3539, 2924, 1782, 1485, 1395, 1070, 1011, 816, 727.

**MS** (EI) *m/z* (%): 184 (100), 182 (95), 103 (53), 115 (48), 89 (35), 77 (28), 63 (23), 51 (13), 224 (3), 226 (3).

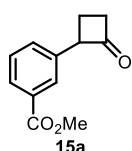

This compound was synthesized according to the procedure above, 67% yield, colorless liquid.

**<sup>1</sup>H NMR** (400 MHz, CDCl<sub>3</sub>) δ 7.94 (d, *J* = 8.0 Hz, 1H), 7.53-7.44 (m, 1H), 7.40-7.28 (m, 2H), 5.43-5.23 (m, 1H), 3.89 (s, 2H), 3.30-3.13 (m, 1H), 3.12-2.94 (m, 1H), 2.58 (qd, *J* = 10.7, 4.4 Hz, 1H), 2.16 (p, *J* = 9.3 Hz, 1H).

**<sup>13</sup>C NMR** (100 MHz, CDCl<sub>3</sub>) δ 207.0, 167.7, 137.6, 132.3, 130.9, 128.9, 128.4, 127.0, 63.1, 52.1, 44.4, 18.8.

**HRMS** (ESI) calculated for C<sub>12</sub>H<sub>12</sub>NaO<sub>3</sub> [M+Na<sup>+</sup>]: 227.0679, found: 226.0678.

**FT-IR** (cm<sup>-1</sup>): 2953, 1781, 1720, 1443, 1273, 1199, 1085, 747.

**MS** (EI) *m/z* (%): 131 (100), 162 (92), 115 (28), 103 (27), 77 (22), 145 (17), 173 (8), 204 (2).

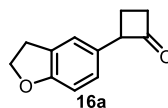

This compound was synthesized according to the procedure above, 80% yield, yellow liquid.

**<sup>1</sup>H NMR** (400 MHz, CDCl<sub>3</sub>) δ 7.08 (s, 1H), 7.01-6.89 (m, 1H), 6.73 (d, *J* = 8.4 Hz, 1H), 4.54 (t, *J* = 8.6 Hz, 1H), 4.50-4.40 (m, 1H), 3.35-3.12 (m, 3H), 3.08-2.92 (m, 1H), 2.51 (qd, *J* = 10.8, 5.1 Hz, 1H), 2.24-2.07 (m, 1H).

**<sup>13</sup>C NMR** (100 MHz, CDCl<sub>3</sub>) δ 208.6, 159.1, 128.5, 127.4, 126.6, 123.6, 109.2, 71.2, 64.2, 44.6, 29.6, 18.2.

**HRMS** (ESI) calculated for  $C_{12}H_{12}NaO_2$  [ $M+Na^+$ ]: 211.0730, found: 211.0729.

**FT-IR** ( $cm^{-1}$ ): 2961, 2895, 1779, 1492, 1238, 1071, 982, 942, 817.

**MS** (EI)  $m/z$  (%): 146 (100), 51 (35), 91 (32), 117 (32), 77 (25), 115 (25), 131 (23), 159 (22), 188 (5).

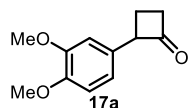

This compound was synthesized according to the procedure above, 72% yield, yellow solid, m. p.: 74-77 °C.

**$^1H$  NMR** (600 MHz,  $CDCl_3$ )  $\delta$  6.88-6.81 (m, 1H), 6.81-6.71 (m, 2H), 4.54-4.44 (m, 1H), 3.88 (s, 3H), 3.86 (s, 3H), 3.28-3.15 (m, 1H), 3.11-2.95 (m, 1H), 2.53 (qd,  $J = 10.8, 4.8$  Hz, 1H), 2.25-2.14 (m, 1H).

**$^{13}C$  NMR** (150 MHz,  $CDCl_3$ )  $\delta$  208.1, 149.0, 148.0, 129.1, 118.9, 111.3, 110.3, 64.0, 55.9, 55.8, 44.6, 17.9.

**HRMS** (ESI) calculated for  $C_{12}H_{14}NaO_3$  [ $M+Na^+$ ]: 229.0835, found: 229.0839.

**FT-IR** ( $cm^{-1}$ ): 3441, 2959, 1779, 1516, 1253, 1141, 1026.

**MS** (EI)  $m/z$  (%): 57 (100), 55 (87), 71 (68), 69 (66), 164 (53), 149 (46), 165 (38), 206 (8).

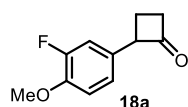

This compound was synthesized according to the procedure above, 76% yield, yellow liquid.

**$^1H$  NMR** (600 MHz,  $CDCl_3$ )  $\delta$  7.05-6.86 (m, 3H), 4.54-4.37 (m, 1H), 3.86 (s, 3H), 3.29-3.15 (m, 1H), 3.10-2.88 (m, 1H), 2.52 (qd,  $J = 10.8, 4.8$  Hz, 1H), 2.23-2.11 (m, 1H).

**$^{13}C$  NMR** (150 MHz,  $CDCl_3$ )  $\delta$  207.4, 152.3 (d,  $J = 244.8$  Hz), 146.5 (d,  $J = 11.0$  Hz), 129.4 (d,  $J = 5.9$  Hz), 122.6 (d,  $J = 4.4$  Hz), 114.8 (d,  $J = 19.1$  Hz), 113.5 (d,  $J = 0.9$  Hz), 63.4, 56.2, 44.7, 17.8.

**$^{19}F$  NMR** (376 MHz,  $CDCl_3$ )  $\delta$  -134.84.

**HRMS** (ESI) calculated for  $C_{11}H_{12}FO_2$  [ $M+H^+$ ]: 195.0816, found: 195.0813.

**FT-IR** ( $cm^{-1}$ ): 2962, 2841, 1781, 1518, 1276, 1128, 1072, 1026, 760.

**MS** (EI)  $m/z$  (%): 139 (100), 141 (64), 125 (36), 57 (36), 111 (35), 152 (30), 195 (5).

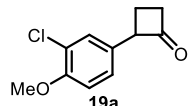

This compound was synthesized according to the procedure above, 76% yield, white solid, m. p.: 57-59 °C.

**$^1H$  NMR** (600 MHz,  $CDCl_3$ )  $\delta$  7.29-7.21 (m, 1H), 7.17-7.04 (m, 1H), 6.88 (d,  $J = 8.4$  Hz, 1H), 4.54-4.34 (m, 1H), 3.87 (s, 3H), 3.32-3.13 (m, 1H), 3.08-2.89 (m, 1H), 2.52 (qd,  $J = 10.8, 4.8$  Hz, 1H), 2.25-2.08 (m, 1H).

**$^{13}C$  NMR** (150 MHz,  $CDCl_3$ )  $\delta$  207.4, 153.8, 129.5, 128.6, 126.3, 122.3, 112.0, 63.1, 56.0, 44.7, 17.7.

**HRMS** (ESI) calculated for  $C_{11}H_{12}ClO_2$  [ $M+H^+$ ]: 211.0520, found: 211.0518.

**FT-IR** ( $cm^{-1}$ ): 2963, 1779, 1503, 1255, 1065, 1022, 810.

**MS** (EI)  $m/z$  (%): 168 (100), 84 (90), 57 (80), 153 (60), 159 (56), 210 (8).

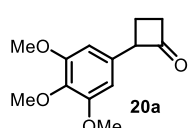

This compound was synthesized according to the procedure above, 65% yield, yellow solid, m. p.: 49-54 °C.

**$^1H$  NMR** (600 MHz,  $CDCl_3$ )  $\delta$  6.48 (s, 2H), 4.48 (m, 1H), 3.86 (s, 6H), 3.82 (s, 3H), 3.27-3.16 (m, 1H), 3.08-2.98 (m, 1H), 2.54 (qd,  $J = 10.7, 4.8$  Hz, 1H), 2.27-2.14 (m, 1H).

**$^{13}C$  NMR** (150 MHz,  $CDCl_3$ )  $\delta$  207.6, 153.2, 136.8, 132.0, 103.8, 64.2, 60.6, 55.9, 44.5, 17.8.

**HRMS** (ESI) calculated for  $C_{13}H_{16}NaO_4$  [ $M+Na^+$ ]: 259.0941, found: 259.0933.

**FT-IR** ( $cm^{-1}$ ): 2940, 2838, 1780, 1587, 1508, 1463, 1241, 1127, 1007.

**MS** (EI)  $m/z$  (%): 194 (100), 236 (80), 179 (78), 193 (62), 177(30), 195 (23), 208 (22), 237 (10).

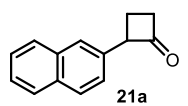

This compound was synthesized according to the procedure above, 74% yield, white solid, m. p.: 82-85 °C.

**$^1H$  NMR** (400 MHz,  $CDCl_3$ )  $\delta$  7.84-7.75 (m, 3H), 7.69 (s, 1H), 7.51-7.39 (m, 2H),

7.35 (dd,  $J = 8.6, 0.8$  Hz, 1H), 4.83-4.56 (m, 1H), 3.25 (s, 1H), 3.17-2.95 (m, 1H), 2.58 (qd,  $J = 10.7, 5.0$  Hz, 1H), 2.39-2.19 (m, 1H).

$^{13}\text{C NMR}$  (100 MHz,  $\text{CDCl}_3$ )  $\delta$  207.8, 133.9, 133.3, 132.4, 128.3, 127.7, 127.6, 126.2, 125.7, 125.3, 125.3, 64.6, 44.9, 17.7.

**HRMS** (ESI) calculated for  $\text{C}_{14}\text{H}_{12}\text{NaO}$  [ $\text{M}+\text{Na}^+$ ]: 219.0780, found: 219.0779.

**FT-IR** ( $\text{cm}^{-1}$ ): 3429, 2964, 1775, 1598, 1074, 1031, 483.

**MS** (EI)  $m/z$  (%): 154 (100), 153 (28), 152 (17), 155 (16), 139 (13), 115 (12), 128 (10), 196 (5).

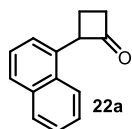

This compound was synthesized according to the procedure above, 62% yield, yellow solid, m. p.: 54-57 °C.

$^1\text{H NMR}$  (400 MHz,  $\text{CDCl}_3$ )  $\delta$  7.83 (d,  $J = 8.0$  Hz, 1H), 7.80-7.74 (m, 1H), 7.67 (d,  $J = 8.4$  Hz, 1H), 7.51-7.39 (m, 3H), 7.33 (t,  $J = 7.6$  Hz, 1H), 4.98 (t,  $J = 8.6$  Hz, 1H), 3.22-3.04 (m, 1H), 3.04-2.86 (m, 1H), 2.49 (m, 1H), 2.31-2.01 (m, 1H).

$^{13}\text{C NMR}$  (100 MHz,  $\text{CDCl}_3$ )  $\delta$  207.6, 133.7, 132.8, 131.0, 128.4, 127.4, 125.9, 125.6, 125.2, 123.7, 123.0, 61.7, 44.4, 18.2.

**HRMS** (ESI) calculated for  $\text{C}_{14}\text{H}_{12}\text{NaO}$  [ $\text{M}+\text{Na}^+$ ]: 219.0780, found: 219.0778.

**FT-IR** ( $\text{cm}^{-1}$ ): 3404, 3047, 2960, 1780, 1396, 1076, 777, 426.

**MS** (EI)  $m/z$  (%): 154 (100), 153 (80), 127 (24), 139 (20), 165 (8), 196 (7).

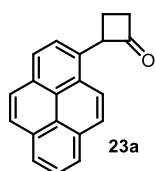

This compound was synthesized according to the procedure above, 57% yield, yellow solid, m. p.: 126-129 °C.

$^1\text{H NMR}$  (400 MHz,  $\text{CDCl}_3$ )  $\delta$  8.20-7.90 (m, 9H), 5.52-5.29 (m, 1H), 3.41-3.26 (m, 1H), 3.22-3.07 (m, 1H), 2.74 (qd,  $J = 10.7, 5.0$  Hz, 1H), 2.49-2.26 (m, 1H).

$^{13}\text{C NMR}$  (100 MHz,  $\text{CDCl}_3$ )  $\delta$  208.1, 131.2, 130.7, 130.4, 130.4, 128.3, 127.6, 127.3, 127.1, 125.9, 125.2, 125.0, 124.8, 124.6, 123.7, 123.1, 62.3, 44.8, 18.9.

**HRMS** (ESI) calculated for  $\text{C}_{20}\text{H}_{14}\text{NaO}$  [ $\text{M}+\text{Na}^+$ ]: 293.0937, found: 293.0934.

**FT-IR** ( $\text{cm}^{-1}$ ): 3442, 3039, 2962, 1776, 1601, 1071, 843, 715.

**MS** (EI)  $m/z$  (%): 228 (100), 113 (65), 227 (62), 239 (53), 253 (50), 119 (48), 126(40), 270 (25).

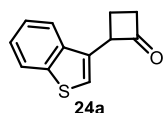

This compound was synthesized according to the procedure above, 26% yield, brown solid, m. p.: 53-55 °C.

$^1\text{H NMR}$  (600 MHz,  $\text{CDCl}_3$ )  $\delta$  7.85 (d,  $J = 7.8$  Hz, 1H), 7.74 (d,  $J = 7.8$  Hz, 1H), 7.42-7.32 (m, 3H), 4.84-4.78 (m, 1H), 3.35-3.26 (m, 1H), 3.19-3.10 (m, 1H), 2.66 (qd,  $J = 10.7, 5.0$  Hz, 1H), 2.29-2.21 (m, 1H).

$^{13}\text{C NMR}$  (150 MHz,  $\text{CDCl}_3$ )  $\delta$  206.8, 140.4, 137.9, 131.3, 124.6, 124.1, 122.9, 122.0, 121.7, 59.1, 45.2, 17.6.

**HRMS** (ESI) calculated for  $\text{C}_{12}\text{H}_{11}\text{OS}$  [ $\text{M}+\text{H}^+$ ]: 203.0525, found: 203.0526.

**FT-IR** ( $\text{cm}^{-1}$ ) 3069, 2962, 1780, 1725, 1428, 1258, 1071, 762, 732, 421.

**MS** (EI)  $m/z$  (%): 161 (100), 115 (62), 139 (56), 173 (52), 147 (48), 202 (20).

## 6. [2+2] Synthesis of Heteroaromatic substituted Cyclobutanone<sup>4</sup>

The substrate **25a-27a** was synthesized according to the literature

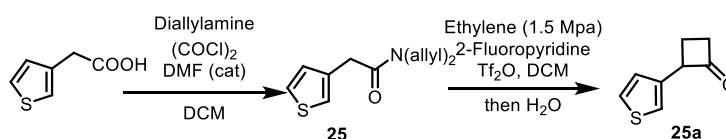

To a solution of 3-thiopheneacetic acid (2.84 g, 20 mmol) in DCM at 0 °C was added oxalyl chloride (2.0 ml, 24 mmol, 1.2 equiv) dropwise carefully. And the reaction mixture was stirred for 30 min at room temperature. The mixture was concentrated in vacuum, dissolved in DCM again and cooled to 0 °C. Diallylamine (7.4 mL, 60 mmol, 3.0 equiv) was added dropwise and stirred until full conversion monitored by TLC. The solution was diluted with a saturated solution of aqueous Na<sub>2</sub>CO<sub>3</sub> (15 mL) and extracted with DCM three times. The combined organic layers were washed with brine, dried (Na<sub>2</sub>SO<sub>4</sub>) and concentrated in vacuum. The crude product can be used in the next step without further purification.

To a solution of the crude product (2.21 g, 10 mmol) in DCM (0.2 M, 50 mL) at 0 °C was added 2-Fluoropyridine (1.12 mL, 13.0 mmol, 1.3 equiv), Tf<sub>2</sub>O (2.02 mL, 12.0 mmol, 1.2 equiv). And then the reaction mixture stirred under ethylene (1.5 MPa) at 60 °C for 30 min, then the solution was diluted with H<sub>2</sub>O (20 mL), and stirred overnight. The organic layers were separated, and the aqueous layer was extracted with DCM. The combined organic layers were washed with saturated aqueous NaHCO<sub>3</sub> and brine, dried (Na<sub>2</sub>SO<sub>4</sub>), and concentrated in vacuo. The residue was purified by column chromatography on silica gel to afford cyclobutanone **25a**.

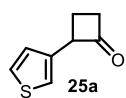

This compound was synthesized according to the procedure above, 31% yield, red liquid.

**<sup>1</sup>H NMR** (600 MHz, CDCl<sub>3</sub>) δ 7.29 (dd, *J* = 4.8, 3.0 Hz, 1H), 7.10 (d, *J* = 3.0 Hz, 1H), 6.99 (dd, *J* = 4.8, 1.2 Hz, 1H), 4.58-4.49 (m, 1H), 3.26-3.15 (m, 1H), 3.10-2.99 (m, 1H),

2.52 (qd, *J* = 10.7, 5.2 Hz, 1H), 2.20-2.10 (m, 1H).

**<sup>13</sup>C NMR** (150 MHz, CDCl<sub>3</sub>) δ 207.2, 136.8, 126.4, 126.0, 120.6, 60.2, 44.9, 18.2.

**HRMS** (ESI) calculated for C<sub>8</sub>H<sub>9</sub>OS [M+H<sup>+</sup>]: 153.0369, found: 153.0374.

**FT-IR** (cm<sup>-1</sup>) 3103, 2961, 1779, 1259, 1072, 845, 784, 752, 628.

**MS** (EI) *m/z* (%): 111 (100), 139 (50), 124 (10), 152 (10).

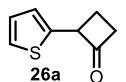

This compound was synthesized according to the procedure above, 15% yield, red liquid.

**<sup>1</sup>H NMR** (600 MHz, CDCl<sub>3</sub>) δ 7.21 (dd, *J* = 5.1, 0.9 Hz, 1H), 6.97 (dd, *J* = 5.4, 3.6 Hz, 1H), 6.91 (d, *J* = 3.6 Hz, 1H), 4.71-4.66 (m, 1H), 3.29-3.19 (m, 1H), 3.14-3.05 (m, 1H),

2.61 (qd, *J* = 10.8, 4.8 Hz, 1H), 2.25-2.16 (m, 1H).

**<sup>13</sup>C NMR** (150 MHz, CDCl<sub>3</sub>) δ 205.7, 138.5, 127.0, 124.3, 124.2, 59.7, 44.9, 19.7.

**HRMS** (ESI) calculated for C<sub>8</sub>H<sub>9</sub>OS [M+H<sup>+</sup>]: 153.0369, found: 153.0370.

**FT-IR** (cm<sup>-1</sup>) 3105, 2962, 2926, 1783, 1727, 1665, 1415, 1258, 1068, 701.

**MS** (EI) *m/z* (%): 111 (100), 139 (50), 124 (10), 152 (10).

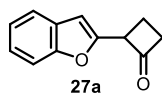

This compound was synthesized according to the procedure above, 27.3% yield, brown solid, m. p.: 34-36 °C.

**<sup>1</sup>H NMR** (600 MHz, CDCl<sub>3</sub>) δ 7.56 (d, *J* = 1.2 Hz, 1H), 7.53 (dd, *J* = 7.8, 1.2 Hz, 1H), 7.47 (d, *J* = 8.4 Hz, 1H), 7.30 (td, *J* = 7.5, 1.2 Hz, 1H), 7.24 (td, *J* = 7.5, 1.0 Hz, 1H), 4.68-4.58 (m, 1H), 3.36-3.25 (m, 1H), 3.18-3.10 (m, 1H), 2.59 (qd, *J* = 10.8, 4.8 Hz, 1H), 2.24-2.10 (m, 1H).

**<sup>13</sup>C NMR** (150 MHz, CDCl<sub>3</sub>) δ 206.6, 155.4, 141.1, 126.6, 124.6, 122.6, 119.9, 116.2, 111.6, 55.1, 45.5, 17.3.

**HRMS** (ESI) calculated for C<sub>12</sub>H<sub>11</sub>O<sub>2</sub> [M+H<sup>+</sup>]: 187.0754, found: 187.0749.

**FT-IR** (cm<sup>-1</sup>) 2962, 2929, 1788, 1724, 1599, 1453, 1255, 803, 750.

**MS** (EI) *m/z* (%): 145 (100), 144 (87), 115 (40), 131 (15), 157 (12), 102 (10), 186 (7).

## 7. Synthesis of 2,3-disubstituted Cyclobutanone<sup>5</sup>

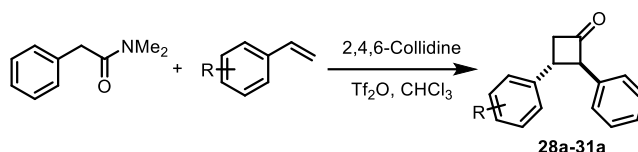

The substrate **28a-31a** was synthesized according to the literature.<sup>5</sup>

### General procedure for the synthesis of 2,3-diphenyl Cyclobutanone **28a**

To a refluxing mixture of *N,N*-Dimethyl-2-phenyl-acetamide (1.63 g, 10 mmol, 1.0 equiv), 2,4,6-Collidine (1.6 mL, 12 mmol, 1.2 equiv) and styrene (5.8 ml, 50 mmol, 5.0 equiv) in  $\text{CHCl}_3$  30 mL under argon atmosphere was added the  $\text{CHCl}_3$  solution of  $\text{Tf}_2\text{O}$  (2.0 mL, 12 mmol, 1.2 equiv) dropwise over 12 h by syringe pump. After full conversion, the reaction mixture was cooled to room temperature, then diluted with  $\text{CH}_2\text{Cl}_2$  and water. The biphasic mixture was stirred for 30 min, then separated and the aqueous layer extracted with  $\text{CH}_2\text{Cl}_2$ , combined organic layers were washed with brine, dried by  $\text{Na}_2\text{SO}_4$ , concentrated in vacuum. The crude products were purified directly by column chromatography on silica gel with a mixture of petroleum ether and ethyl acetate to give cyclobutanone **28a**.

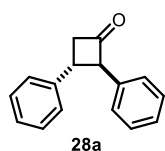

This compound was synthesized according to the procedure above, 67% yield, white solid, m.p.: 49-51 °C.

<sup>1</sup>H NMR (400 MHz,  $\text{CDCl}_3$ )  $\delta$  7.42-7.19 (m, 10H), 4.55 (dt,  $J$  = 8.8, 1.6 Hz, 1H), 3.78 (q,  $J$  = 8.9 Hz, 1H), 3.47-3.24 (m, 2H).

<sup>13</sup>C NMR (100 MHz,  $\text{CDCl}_3$ )  $\delta$  204.9, 142.4, 135.6, 128.7, 128.7, 127.2, 127.0, 126.8, 126.5, 71.3, 51.3, 36.7.

HRMS (ESI) calculated for  $\text{C}_{16}\text{H}_{14}\text{NaO}$  [ $\text{M}+\text{Na}^+$ ]: 245.0937, found: 245.0932.

FT-IR ( $\text{cm}^{-1}$ ): 3451, 2923, 1778, 1452, 1074, 6950.

MS (EI)  $m/z$  (%): 134 (100), 148 (47), 118 (34), 91 (25), 77 (22), 180 (14), 165 (5), 223 (1).

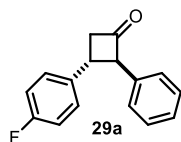

This compound was synthesized according to the procedure above, 69% yield, colorless liquid.

<sup>1</sup>H NMR (400 MHz,  $\text{CDCl}_3$ )  $\delta$  7.41-7.19 (m, 7H), 7.11-6.99 (m, 2H), 4.52 (dt,  $J$  = 8.9, 2.1 Hz, 1H), 3.77 (q,  $J$  = 8.8 Hz, 1H), 3.48-3.23 (m, 2H).

<sup>13</sup>C NMR (100 MHz,  $\text{CDCl}_3$ )  $\delta$  204.5, 161.7 (d,  $J$  = 244 Hz), 138.1 (d,  $J$  = 3.2 Hz), 135.4, 128.7, 128.1 (d,  $J$  = 7.9 Hz), 127.3, 127.0, 115.6 (d,  $J$  = 21.4 Hz), 71.6, 51.4, 36.2.

<sup>19</sup>F NMR (376 MHz,  $\text{CDCl}_3$ )  $\delta$  -115.61.

HRMS (ESI) calculated for  $\text{C}_{16}\text{H}_{14}\text{FO}$  [ $\text{M}+\text{H}^+$ ]: 241.1023, found: 241.1030.

FT-IR ( $\text{cm}^{-1}$ ): 3029, 1781, 1510, 1225, 1174, 831, 697, 525.

MS (EI)  $m/z$  (%): 198 (100), 118 (96), 90 (48), 183 (22), 133 (10), 240 (1).

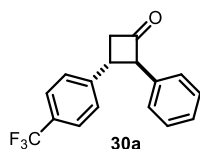

This compound was synthesized according to the procedure above, 69% yield, yellow solid, m.p.: 35-37 °C.

<sup>1</sup>H NMR (400 MHz,  $\text{CDCl}_3$ )  $\delta$  7.62 (d,  $J$  = 8.0 Hz, 2H), 7.47 (d,  $J$  = 8.8 Hz, 2H), 7.40-7.31 (m, 2H), 7.31-7.24 (m, 3H), 4.58 (d,  $J$  = 8.8 Hz, 1H), 3.86 (q,  $J$  = 8.9 Hz, 1H), 3.42 (m, 2H).

<sup>13</sup>C NMR (100 MHz,  $\text{CDCl}_3$ )  $\delta$  203.9, 146.4 (d,  $J$  = 1.1 Hz), 135.2, 129.2 (q,  $J$  = 32.3 Hz), 128.8, 127.5, 127.0, 127.0, 125.7 (q,  $J$  = 3.7 Hz), 71.6, 51.2, 36.8.

<sup>19</sup>F NMR (376 MHz,  $\text{CDCl}_3$ )  $\delta$  -62.39.

**HRMS** (ESI) calculated for C<sub>17</sub>H<sub>14</sub>F<sub>3</sub>O [M+H<sup>+</sup>]: 291.0991, found: 291.0992.

**FT-IR** (cm<sup>-1</sup>): 3030, 1784, 1619, 1326, 1165, 1122, 1068, 835, 697.

**MS** (EI) *m/z* (%): 248 (100), 118 (68), 179 (66), 89 (54), 90 (50), 262 (25), 290 (5).

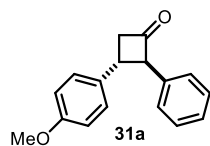

This compound was synthesized according to the procedure above, 39% yield, yellow liquid.

**<sup>1</sup>H NMR** (600 MHz, CDCl<sub>3</sub>) δ 7.37-7.31 (m, 2H), 7.29-7.24 (m, 5H), 6.98-6.85 (m, 2H), 4.53 (dt, *J* = 9.0, 2.1 Hz, 1H), 3.80 (s, 3H), 3.78-3.69 (m, 1H), 3.43-3.26 (m, 2H).

**<sup>13</sup>C NMR** (150 MHz, CDCl<sub>3</sub>) δ 205.4, 158.5, 135.7, 134.5, 128.7, 127.6, 127.2, 127.0, 114.1, 71.5, 55.3, 51.5, 36.1.

**HRMS** (ESI) calculated for C<sub>17</sub>H<sub>17</sub>O [M+H<sup>+</sup>]: 253.1223, found: 253.1223.

**FT-IR** (cm<sup>-1</sup>): 3084, 2933, 2835, 1777, 1513, 1249, 1179, 1033, 829, 698.

**MS** (EI) *m/z* (%): 134 (100), 105 (50), 136 (24), 119 (10), 179 (10), 210 (5), 252 (1).

## 8. Characterization of the products and unreacted Cyclobutanone

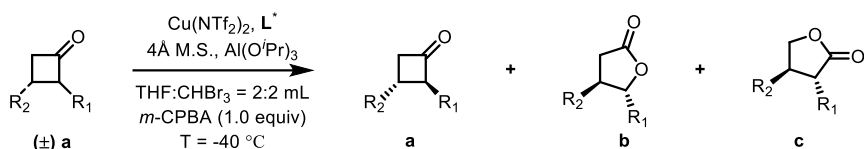

**General procedure:** the mixture of anhydrous Cu(NTf<sub>2</sub>)<sub>2</sub> (12.5 mg, 0.02 mmol), **L1** (6.4 mg, 0.024 mmol) was stirred in THF (1 mL) for 1 h at room temperature (r. t.). The 4Å molecular sieves (M.S., 60 mg), Al(O<sup>i</sup>Pr)<sub>3</sub> (20.4 mg, 50% mol) and **1a** was added to an oven-dried reaction tube in batches, then the chiral catalyst solution prepared beforehand, THF (1 mL) and CHBr<sub>3</sub> (2 mL) were added, the reaction mixture was cooled to -40 °C for 20 min. Then, the *m*-CPBA (0.2 mmol) was added to the reaction mixture at -40 °C. The Na<sub>2</sub>SO<sub>3</sub> (126 mg, 1.0 mmol) was added after the reaction mixture had been stirred for the time indicated at -40 °C, and stirred for additional 2 h at -40 °C. The DCM (10 mL) was added, the solution was extracted with DCM. The combined organic layers were washed with brine, dried (NaSO<sub>4</sub>), concentrated and the crude product was purified by flash column chromatography on silica gel at -15 °C to afford the desired lactones **b/c** and recover the unreacted ketones **a**.

**Indicated procedure a:** The reaction was performed at 20 °C.

**Indicated procedure b:** The THF/Et<sub>2</sub>O/CHBr<sub>3</sub> (1.0/1.0/2.0 mL) was used.

**Indicated procedure c:** 0.6 equiv of *m*-CPBA was used.

**Indicated procedure d:** Cu(OTf)<sub>2</sub> and *ent*-**L1** was used.

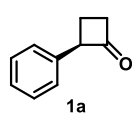

### (-)-2-phenylcyclobutan-1-one (**1a**):

Prepared according to **general procedure**: 36 h, 43% yield, 91.2% ee

[α]<sub>D</sub><sup>22</sup> = -15.0 (c = 1.0, CHCl<sub>3</sub>).

The ee value was determined by the chiral UPC<sup>2</sup> analysis (CHIRALPAK® IG-3, CO<sub>2</sub>/MeOH = 95/05, v = 2.0 mL/min, λ = 205.0 nm, t (major) = 1.041 min, t (minor) = 1.190 min.



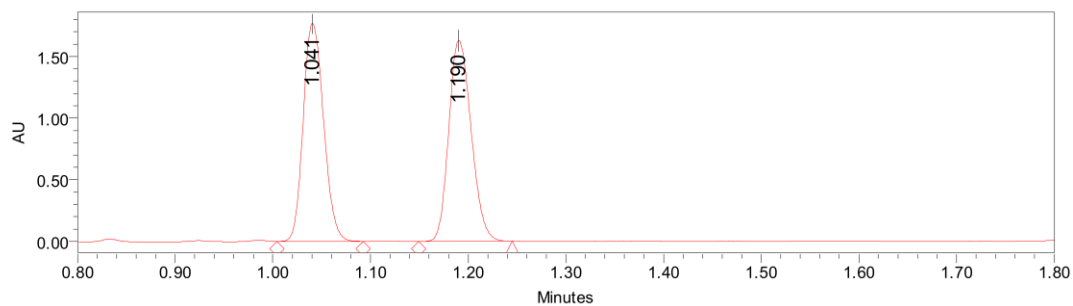

|   | RT    | Area    | % Area | Height  |
|---|-------|---------|--------|---------|
| 1 | 1.041 | 2573419 | 49.75  | 1773586 |
| 2 | 1.190 | 2599177 | 50.25  | 1631409 |

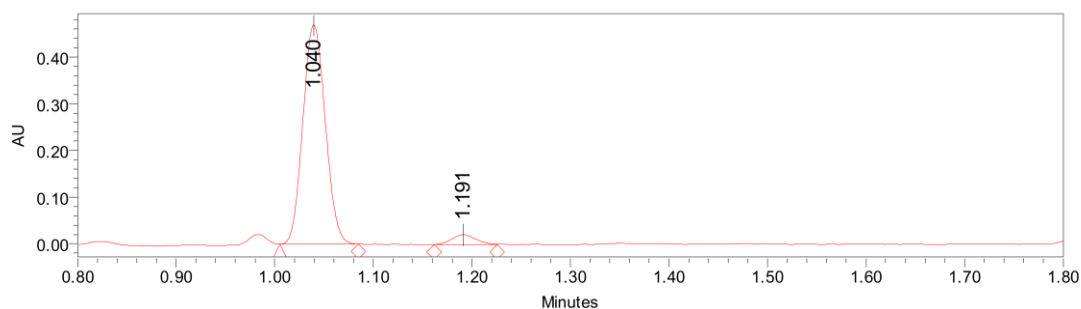

|   | RT    | Area   | % Area | Height |
|---|-------|--------|--------|--------|
| 1 | 1.040 | 743230 | 95.61  | 470195 |
| 2 | 1.191 | 34104  | 4.39   | 20535  |

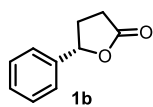

**(-)-5-phenyldihydrofuran-2(3H)-one (1b):**

Prepared according to **general procedure**: 36 h, 52% yield, 92.6% ee, **1b/1c** = 12.5/1, colorless liquid.

$[\alpha]_D^{23} = -27.0$  (c = 1.0, CHCl<sub>3</sub>).

<sup>1</sup>H NMR (400 MHz, CDCl<sub>3</sub>) δ 7.42-7.30 (m, 5H), 5.53-5.46 (m, 1H), 2.70-2.60 (m, 3H), 2.23-2.11 (m, 1H).

<sup>13</sup>C NMR (100 MHz, CDCl<sub>3</sub>) δ 176.8, 139.3, 128.6, 128.3, 125.2, 81.1, 30.8, 28.8.

HRMS (ESI) calculated for C<sub>10</sub>H<sub>10</sub>NaO<sub>2</sub> [M+Na<sup>+</sup>]: 185.0573, found: 185.0570.

FT-IR (cm<sup>-1</sup>): 2926, 1173, 1216, 1176, 1141, 1025, 940, 699.

MS (EI) *m/z* (%): 84 (100), 56 (74), 51 (68), 107 (66), 117 (65), 105 (56), 162 (42).

The ee value was determined by the chiral UPC<sup>2</sup> analysis (CHIRALPAK<sup>®</sup> IC-3, CO<sub>2</sub>/MeOH = 95/05, v = 2.0 mL/min, λ = 205.0 nm), t<sub>b</sub> (minor) = 2.304 min, t<sub>b</sub> (major) = 2.476 min, t<sub>c</sub> (minor) = 3.102 min, t<sub>c</sub> (major) = 3.240 min.

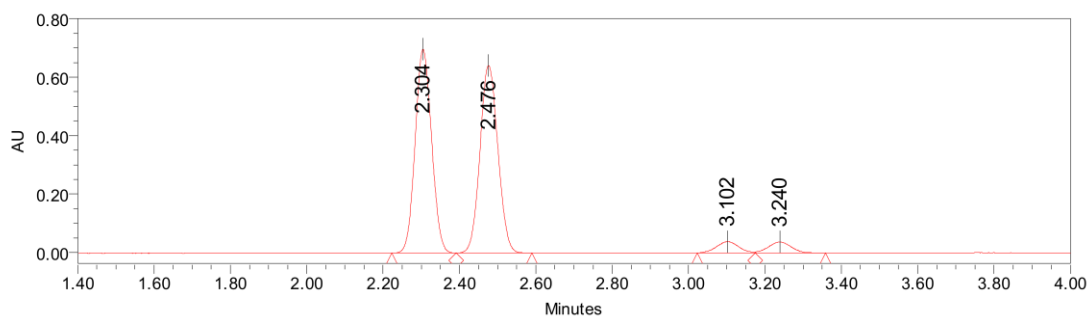

|   | RT    | Area    | % Area | Height |
|---|-------|---------|--------|--------|
| 1 | 2.304 | 2085191 | 46.59  | 697184 |
| 2 | 2.476 | 2090832 | 46.71  | 641540 |
| 3 | 3.102 | 149444  | 3.34   | 38233  |
| 4 | 3.240 | 150501  | 3.36   | 36944  |

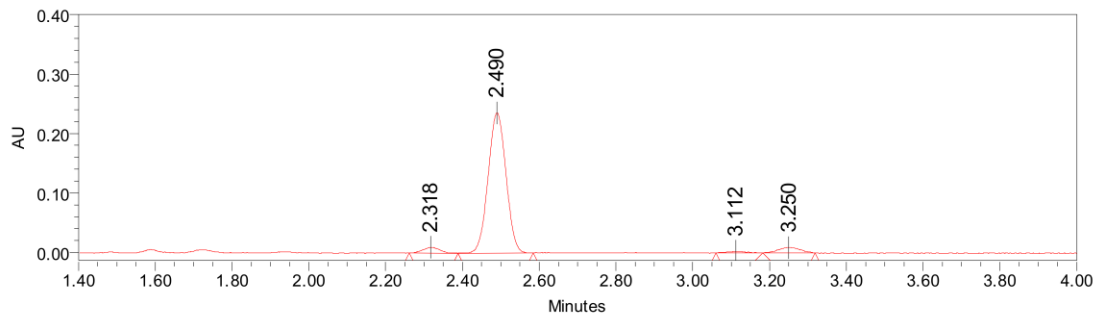

|   | RT    | Area   | % Area | Height |
|---|-------|--------|--------|--------|
| 1 | 2.318 | 29242  | 3.50   | 9795   |
| 2 | 2.490 | 764873 | 91.46  | 236179 |
| 3 | 3.112 | 7537   | 0.90   | 2429   |
| 4 | 3.250 | 34597  | 4.14   | 9074   |

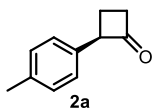

**(-)-2-(p-tolyl)cyclobutan-1-one (2a)**

Prepared according to **general procedure**: 48 h, 43% yield, 98.4% ee.

$[\alpha]_D^{22} = -15.0$  (c = 1.0, CHCl<sub>3</sub>).

The ee value was determined by the chiral UPC<sup>2</sup> analysis (CHIRALPAK<sup>®</sup> IG-3, CO<sub>2</sub>/MeOH = 95/05, v = 2.0 mL/min,  $\lambda = 205.0$  nm, t (major) = 1.213 min, t (minor) = 1.402 min).

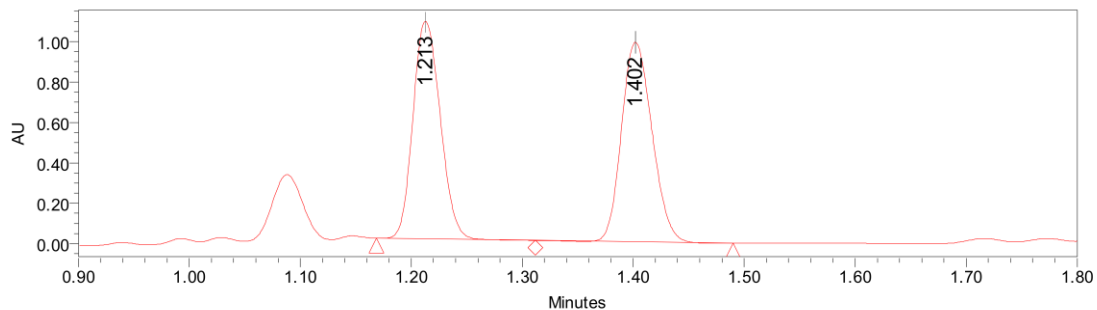

|   | RT    | Area    | % Area | Height  |
|---|-------|---------|--------|---------|
| 1 | 1.213 | 1845000 | 49.41  | 1076762 |
| 2 | 1.402 | 1889430 | 50.59  | 986704  |

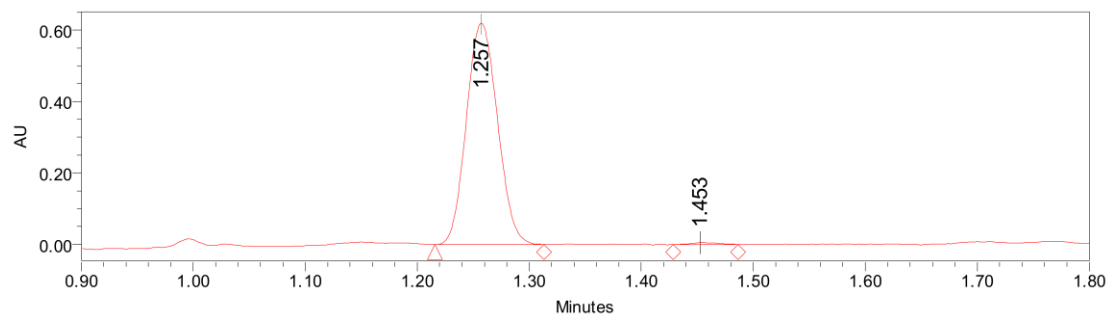

|   | RT    | Area    | % Area | Height |
|---|-------|---------|--------|--------|
| 1 | 1.257 | 1199679 | 99.19  | 620090 |
| 2 | 1.453 | 9815    | 0.81   | 5446   |

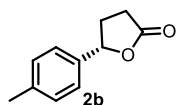

**(-)-5-(p-tolyl)dihydrofuran-2(3H)-one (2b)**

Prepared according to **general procedure**: 48 h, 57% yield, 89.8% ee, **2b/2c** = 10.0/1, colorless liquid.

$[\alpha]_D^{25} = -10.0$  ( $c = 1.0$ ,  $\text{CHCl}_3$ ).

$^1\text{H NMR}$  (600 MHz,  $\text{CDCl}_3$ )  $\delta$  7.21 (q,  $J = 8.6$  Hz, 4H), 5.51-5.44 (m, 1H), 2.67-2.61 (m, 3H), 2.36 (s, 3H), 2.21-2.15 (m, 1H).

$^{13}\text{C NMR}$  (150 MHz,  $\text{CDCl}_3$ )  $\delta$  176.9, 138.3, 136.3, 129.4, 125.3, 81.3, 30.9, 29.0, 21.1.

HRMS (ESI) calculated for  $\text{C}_{11}\text{H}_{12}\text{NaO}_2$  [ $\text{M}+\text{Na}^+$ ]: 199.0730, found: 199.0723.

**FT-IR** ( $\text{cm}^{-1}$ ): 3407, 2923, 1772, 1175, 1141, 1025, 938, 803.

**MS** (EI)  $m/z$  (%): 121 (100), 176 (69), 119 (54), 117 (52), 161 (34), 132 (20).

The ee value was determined by the chiral UPC<sup>2</sup> analysis (CHIRALPAK<sup>®</sup> IG-3,  $\text{CO}_2/\text{MeOH} = 95/05$ ,  $v = 2.0$  mL/min,  $\lambda = 205.0$  nm),  $t_b$  (major) = 3.438 min,  $t_b$  (minor) = 4.193 min,  $t_c = 3.673$  min.

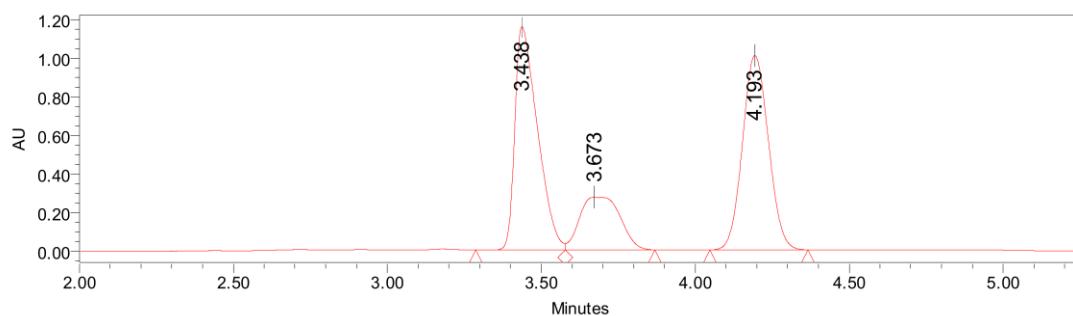

|   | RT    | Area    | % Area | Height  |
|---|-------|---------|--------|---------|
| 1 | 3.438 | 5907715 | 41.28  | 1157066 |
| 2 | 3.673 | 2492912 | 17.42  | 272842  |
| 3 | 4.193 | 5911667 | 41.30  | 1007212 |

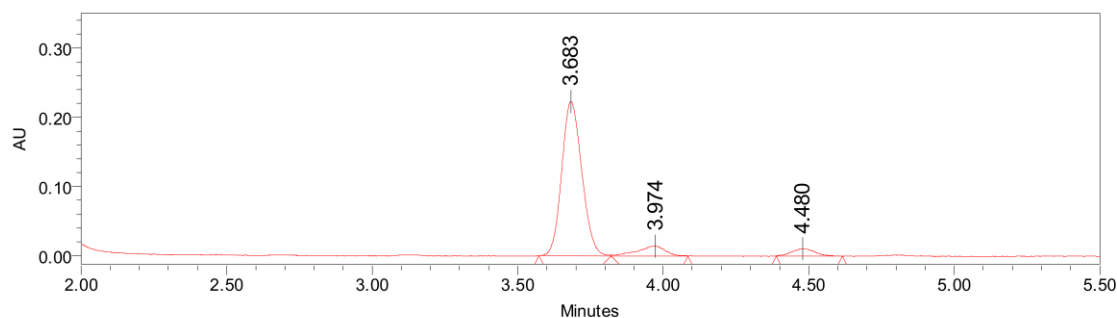

|   | RT    | Area    | % Area | Height |
|---|-------|---------|--------|--------|
| 1 | 3.683 | 1068463 | 87.50  | 222938 |
| 2 | 3.974 | 95045   | 7.78   | 14253  |
| 3 | 4.480 | 57646   | 4.72   | 10360  |

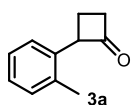

**(-)-2-(o-tolyl)cyclobutan-1-one (3a)**

Prepared according to **indicated procedure a**: 72 h, 52% yield, 7.3% ee, colorless liquid.

$[\alpha]_D^{22} = -3.0$  ( $c = 1.0$ ,  $\text{CHCl}_3$ ).

The ee value was determined by the chiral UPC<sup>2</sup> analysis (CHIRALPAK<sup>®</sup> IG-3, CO<sub>2</sub>/MeOH = 95/05, v = 2.0 mL/min, λ = 205.0 nm, t (major) = 0.989min, t (minor) = 1.186 min).

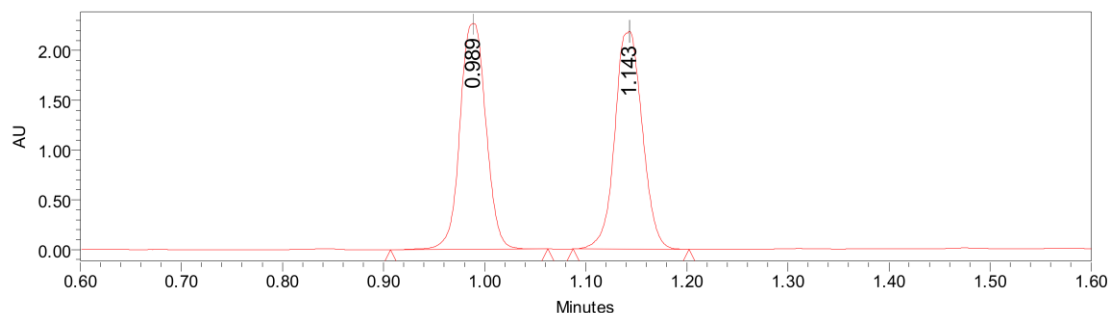

|   | RT    | Area    | % Area | Height  |
|---|-------|---------|--------|---------|
| 1 | 0.989 | 4043020 | 49.45  | 2269209 |
| 2 | 1.143 | 4133217 | 50.55  | 2188244 |

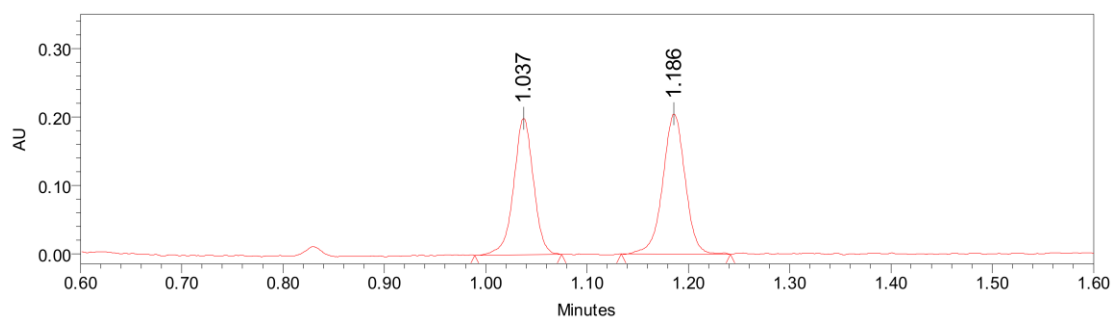

|   | RT    | Area   | % Area | Height |
|---|-------|--------|--------|--------|
| 1 | 1.037 | 271554 | 46.33  | 199282 |
| 2 | 1.186 | 314581 | 53.67  | 204793 |

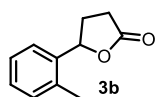

**(-)-5-(o-tolyl)dihydrofuran-2(3H)-one (3b)**

Prepared according to **indicated procedure a**: 72 h, 44% yield, 61.5% ee (**3c**: 44.8% ee), **3b/3c** = 1.5/1, colorless liquid.

$[\alpha]_D^{22} = -8.0$  (c = 1.0, CHCl<sub>3</sub>).

<sup>1</sup>H NMR (600 MHz, CDCl<sub>3</sub>) δ 7.39-7.32 (m, 1H), 7.26-7.23 (m, 2H), 7.22-7.15 (m, 1H), 5.76-5.67 (m, 1H), 2.73-2.63 (m, 3H), 2.34 (s, 3H), 2.17-2.09 (m, 1H).

<sup>13</sup>C NMR (150 MHz, CDCl<sub>3</sub>) δ 177.1, 137.5, 134.1, 130.7, 128.1, 126.4, 124.1, 78.9, 29.5, 28.7, 19.0.

**HRMS** (ESI) calculated for C<sub>11</sub>H<sub>12</sub>O<sub>2</sub>Na [M+Na<sup>+</sup>]: 199.0730, found: 199.0731.

**FT-IR** (cm<sup>-1</sup>): 2923, 1772, 1175, 1143, 1023, 937, 801, 717.

**MS** (EI) *m/z* (%): 176 (100), 117 (87), 121 (86%), 119 (80), 131 (60), 132 (18), 120 (18).

The ee value was determined by the chiral UPC<sup>2</sup> analysis (CHIRALPAK<sup>®</sup> IC-3, CO<sub>2</sub>/MeOH = 95/05, v = 2.0 mL/min, λ = 205.0 nm), t<sub>b</sub> (minor) = 2.462 min, t<sub>b</sub> (major) = 2.782 min, t<sub>c</sub> (major) = 3.089 min t<sub>c</sub> (minor) = 3.349 min.

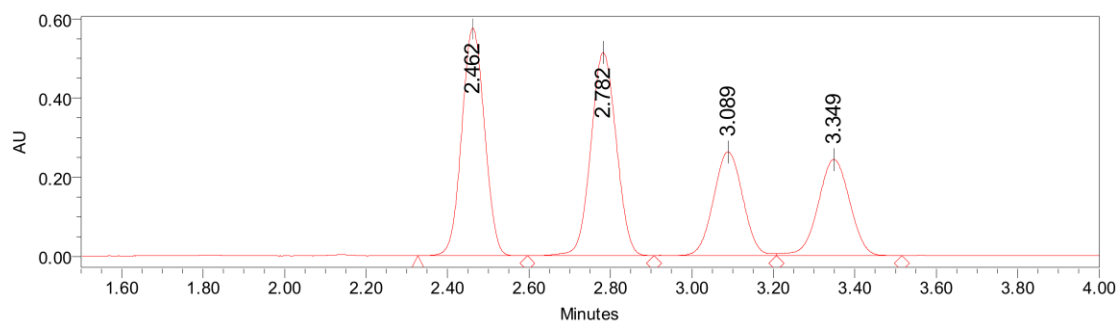

|   | RT    | Area    | % Area | Height |
|---|-------|---------|--------|--------|
| 1 | 2.462 | 2226644 | 31.47  | 574956 |
| 2 | 2.782 | 2224117 | 31.44  | 513060 |
| 3 | 3.089 | 1311916 | 18.54  | 262297 |
| 4 | 3.349 | 1311711 | 18.54  | 243108 |

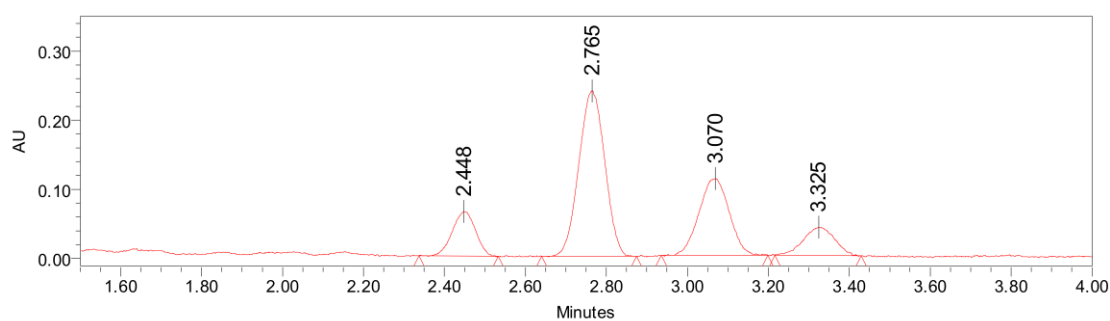

|   | RT    | Area    | % Area | Height |
|---|-------|---------|--------|--------|
| 1 | 2.448 | 254292  | 12.07  | 64166  |
| 2 | 2.765 | 1065289 | 50.55  | 239390 |
| 3 | 3.070 | 570449  | 27.07  | 110259 |
| 4 | 3.325 | 217397  | 10.32  | 40716  |

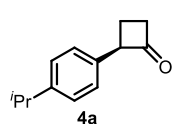

**(-)-2-(4-isopropylphenyl)cyclobutan-1-one (4a)**

Prepared according to **indicated procedure b**: 50 h, 44% yield, 90.2% ee.

$[\alpha]_D^{24} = -25.0$  ( $c = 1.0$ ,  $\text{CHCl}_3$ ).

The ee value was determined by the chiral UPC<sup>2</sup> analysis (CHIRALPAK® IG-3,  $\text{CO}_2/\text{MeOH} = 98/02$ ,  $v = 2.0$  mL/min,  $\lambda = 205.0$  nm),  $t$  (major) = 1.819 min,  $t$  (minor) = 2.434 min.

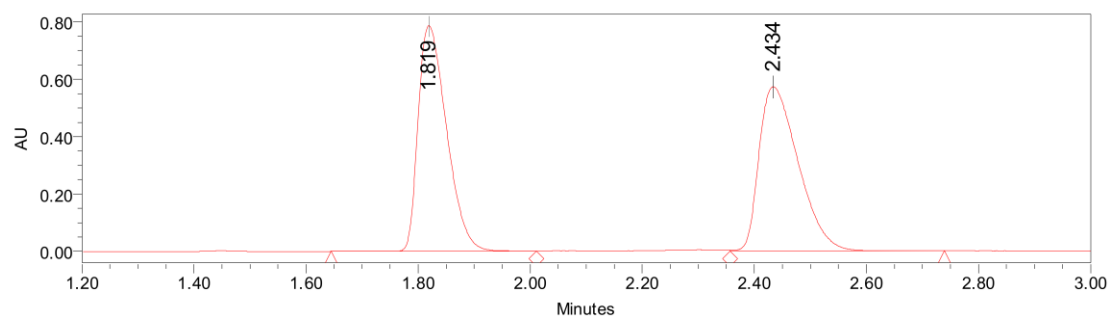

|   | RT    | Area    | % Area | Height |
|---|-------|---------|--------|--------|
| 1 | 1.819 | 2774264 | 49.96  | 787186 |
| 2 | 2.434 | 2779124 | 50.04  | 572559 |

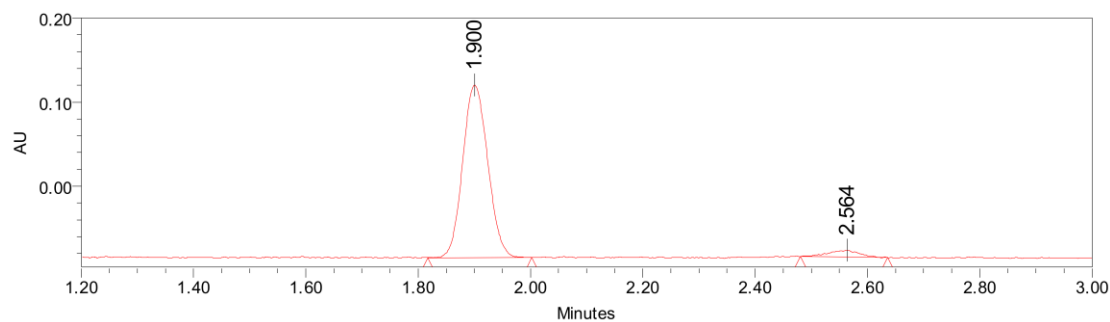

|   | RT    | Area   | % Area | Height |
|---|-------|--------|--------|--------|
| 1 | 1.900 | 634363 | 95.12  | 205209 |
| 2 | 2.564 | 32531  | 4.88   | 8219   |

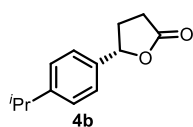

**(-)-5-(4-isopropylphenyl)dihydrofuran-2(3H)-one (4b)**

Prepared according to **indicated procedure b**: 50 h, 52% yield, 90.6% ee, **4b/4c** = 9.2/1, white solid, m. p.: 39-44 °C.

$[\alpha]_D^{24} = -11.0$  (c = 1.0, CHCl<sub>3</sub>).

**<sup>1</sup>H NMR** (400 MHz, CDCl<sub>3</sub>) δ 7.29-7.24 (m, 4H), 5.53-5.43 (m, 1H), 2.91 (hept, *J* = 6.9 Hz, 1H), 2.69-2.59 (m, 3H), 2.26-2.16 (m, 1H), 1.25 (s, 3H), 1.24 (s, 3H).

**<sup>13</sup>C NMR** (100 MHz, CDCl<sub>3</sub>) δ 176.9, 149.2, 136.6, 126.7, 125.4, 81.3, 33.8, 30.8, 29.0, 23.9.

**HRMS** (ESI) calculated for C<sub>13</sub>H<sub>17</sub>O<sub>2</sub> [M+H<sup>+</sup>]: 225.1223, found: 225.1222.

**FT-IR** (cm<sup>-1</sup>): 2960, 1773, 1176, 1142, 1018, 938, 808.

**MS** (EI) *m/z* (%): 149 (100), 161 (96), 105 (60), 91 (60), 201 (58), 145 (50), 119 (44), 189 (42).

The ee value was determined by the chiral UPC<sup>2</sup> analysis (CHIRALPAK® IG-3, CO<sub>2</sub>/MeOH = 95/05, v = 2.0 mL/min, λ = 216.7 nm), t<sub>b</sub> (major) = 4.185 min, t<sub>b</sub> (minor) = 4.988 min, t<sub>c</sub> (minor) = 3.348 min, t<sub>c</sub> (major) = 3.436 min.

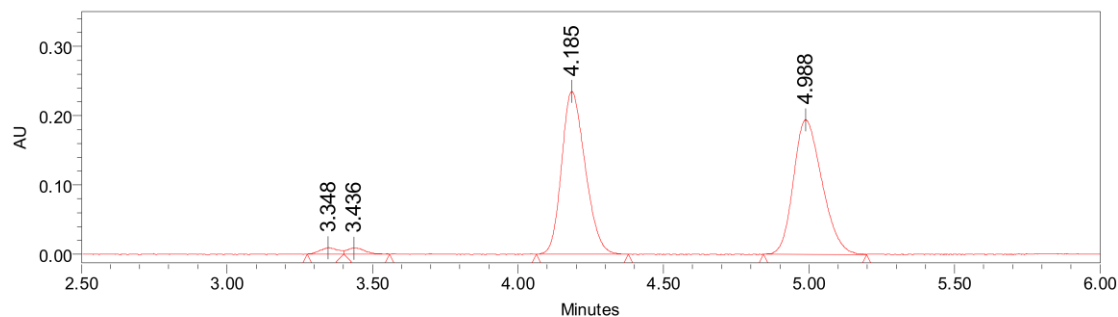

|   | RT    | Area    | % Area | Height |
|---|-------|---------|--------|--------|
| 1 | 3.348 | 41522   | 1.52   | 9448   |
| 2 | 3.436 | 38381   | 1.41   | 8922   |
| 3 | 4.185 | 1324877 | 48.57  | 235008 |
| 4 | 4.988 | 1322940 | 48.50  | 194411 |

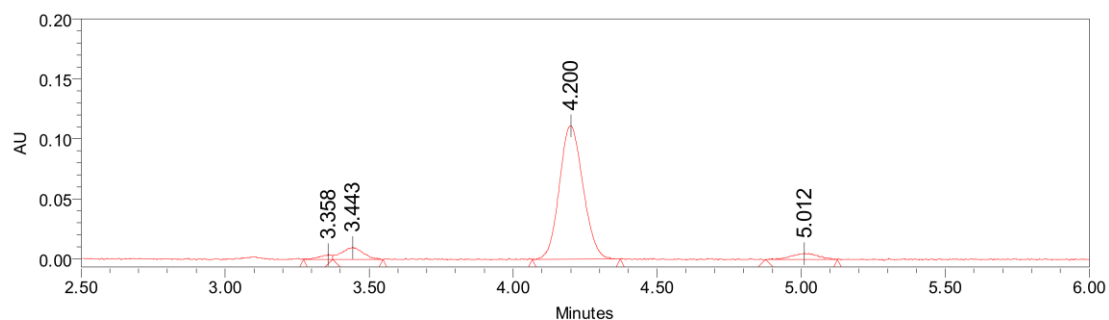

|   | RT    | Area   | % Area | Height |
|---|-------|--------|--------|--------|
| 1 | 3.358 | 10534  | 1.44   | 3911   |
| 2 | 3.443 | 51056  | 6.99   | 9797   |
| 3 | 4.200 | 637729 | 87.27  | 111679 |
| 4 | 5.012 | 31447  | 4.30   | 4789   |

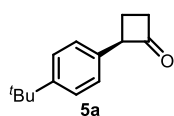

**(-)-2-(4-(tert-butyl)phenyl)cyclobutan-1-one (5a)**

Prepared according to **indicated procedure b**: 50 h, 53% yield, 78.3% ee.

$[\alpha]_D^{26} = -28.0$  (c = 1.0, CHCl<sub>3</sub>).

The ee value was determined by the chiral UPC<sup>2</sup> analysis (CHIRALPAK<sup>®</sup> IC-3, CO<sub>2</sub>/MeOH = 98/02, v = 2.0 mL/min,  $\lambda = 219.1$  nm), t (major) = 2.897 min, t (minor) = 3.729 min.

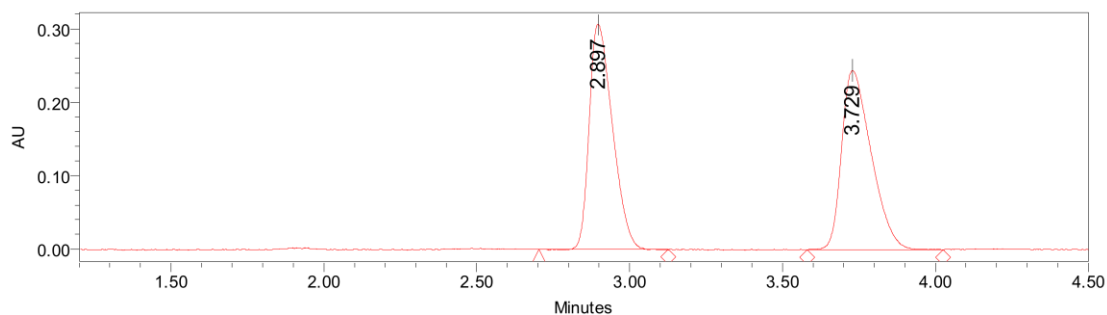

|   | RT    | Area    | % Area | Height |
|---|-------|---------|--------|--------|
| 1 | 2.897 | 1622749 | 49.77  | 307125 |
| 2 | 3.729 | 1638036 | 50.23  | 244106 |

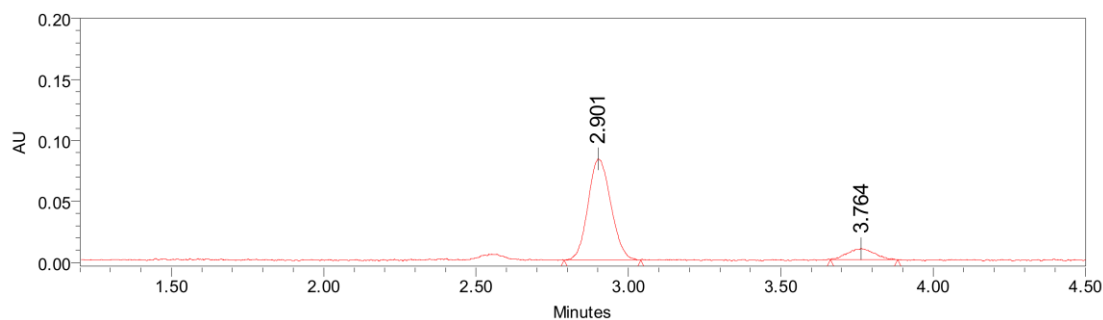

|   | RT    | Area   | % Area | Height |
|---|-------|--------|--------|--------|
| 1 | 2.901 | 433013 | 89.13  | 82995  |
| 2 | 3.764 | 52815  | 10.87  | 8898   |

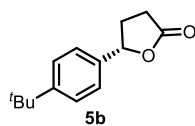

**(-)-5-(4-(tert-butyl)phenyl)dihydrofuran-2(3H)-one (5b)**

Prepared according to **indicated procedure b**: 50 h, 43% yield, 92.2% ee, **5b/5c** = 10.0/1, colorless liquid.

$[\alpha]_D^{26} = -15.0$  ( $c = 1.0$ ,  $\text{CHCl}_3$ )

**$^1\text{H NMR}$**  (600 MHz,  $\text{CDCl}_3$ )  $\delta$  7.41 (d,  $J = 7.8$  Hz, 2H), 7.27 (d,  $J = 8.4$  Hz, 2H), 5.52-5.48 (m, 1H), 2.68-2.61 (m, 3H), 2.26-2.17 (m, 1H), 1.32 (s, 9H).

**$^{13}\text{C NMR}$**  (150 MHz,  $\text{CDCl}_3$ )  $\delta$  177.0, 151.6, 136.2, 125.6, 125.1, 81.2, 34.6, 31.3, 30.8, 29.0.

**HRMS** (ESI) calculated for  $\text{C}_{14}\text{H}_{18}\text{NaO}_2$  [ $\text{M}+\text{Na}^+$ ]: 241.1199, found: 241.1191.

**FT-IR** ( $\text{cm}^{-1}$ ): 3396, 2961, 1767, 1410, 1170, 1141, 1031, 942.

**MS** (EI)  $m/z$  (%): 203 (100), 218 (20), 85 (28), 91 (18), 57 (13), 115 (11), 175 (10), 159 (10), 128 (10).

The ee value was determined by the chiral UPC<sup>2</sup> analysis (CHIRALPAK<sup>®</sup> AD-3,  $\text{CO}_2/\text{MeOH} = 95/05$ ,  $v = 2.0$  mL/min,  $\lambda = 216.7$  nm),  $t_b$  (major) = 2.455 min,  $t_b$  (minor) = 2.851 min,  $t_c$  (major) = 1.854 min,  $t_c$  (minor) = 2.052 min.

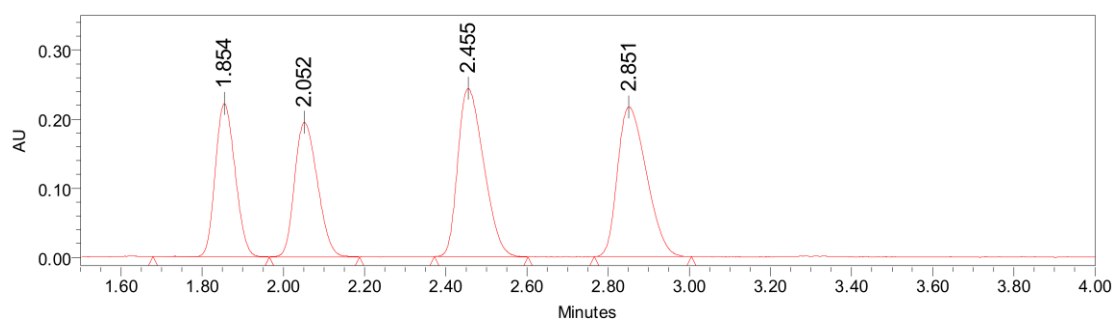

|   | RT    | Area    | % Area | Height |
|---|-------|---------|--------|--------|
| 1 | 1.854 | 752966  | 20.53  | 221618 |
| 2 | 2.052 | 760230  | 20.73  | 194598 |
| 3 | 2.455 | 1078612 | 29.41  | 243406 |
| 4 | 2.851 | 1075936 | 29.34  | 216800 |

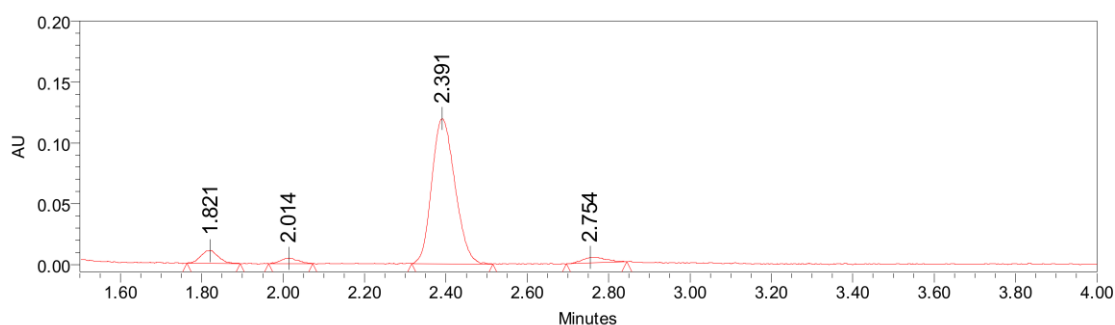

|   | RT    | Area   | % Area | Height |
|---|-------|--------|--------|--------|
| 1 | 1.821 | 31785  | 5.95   | 10600  |
| 2 | 2.014 | 12790  | 2.40   | 4392   |
| 3 | 2.391 | 470095 | 88.06  | 119258 |
| 4 | 2.754 | 19167  | 3.59   | 4666   |

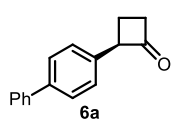

**(-)-2-([1,1'-biphenyl]-4-yl)cyclobutan-1-one (6a)**

Prepared according to **general procedure**: 42 h, 45% yield, 90.2% ee.

$[\alpha]_D^{26} = -30.0$  ( $c = 1.0$ ,  $\text{CHCl}_3$ )

The ee value was determined by the chiral UPC<sup>2</sup> analysis (CHIRALPAK<sup>®</sup> AD-3,  $\text{CO}_2/\text{MeOH} = 95/05$ ,  $v = 2.0$  mL/min,  $\lambda = 251.0$  nm),  $t$  (major) = 4.596 min,  $t$  (minor) = 6.211 min.



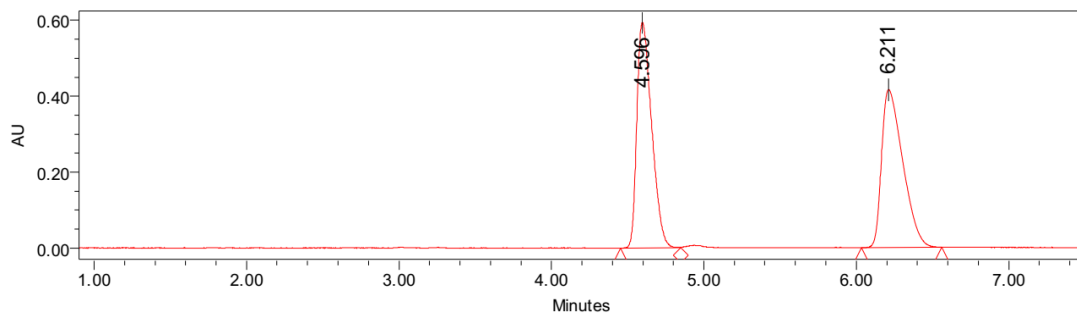

|   | RT    | Area    | % Area | Height |
|---|-------|---------|--------|--------|
| 1 | 4.596 | 4011514 | 49.95  | 594170 |
| 2 | 6.211 | 4019661 | 50.05  | 416074 |

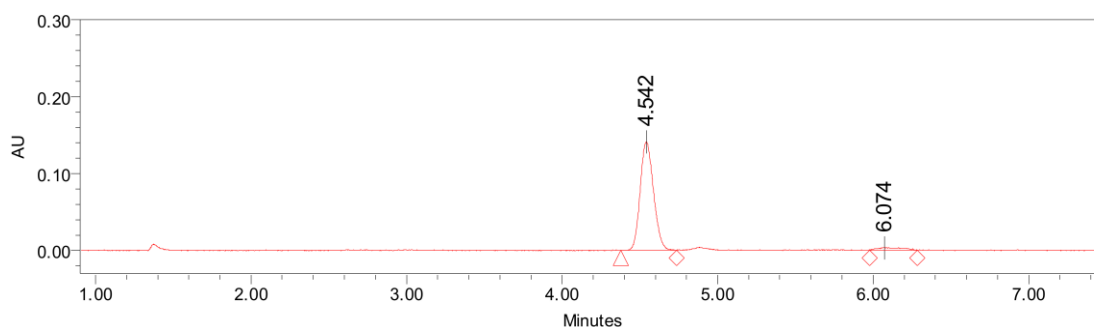

|   | RT    | Area   | % Area | Height |
|---|-------|--------|--------|--------|
| 1 | 4.542 | 833524 | 95.13  | 140835 |
| 2 | 6.074 | 42635  | 4.87   | 3505   |

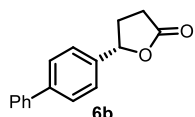

**(S)-5-([1,1'-biphenyl]-4-yl)dihydrofuran-2(3H)-one (6b)**

Prepared according to **general procedure**: 42 h, 54% yield, 91.1% ee, **6b/6c** = =12.5/1, white solid, m. p.: 105-107 °C.

$[\alpha]_D^{30} = -24.0$  (c = 1.0, CHCl<sub>3</sub>)

<sup>1</sup>H NMR (400 MHz, CDCl<sub>3</sub>) δ 7.65-7.55 (m, 4H), 7.49-7.33 (m, 5H), 5.59-5.51 (m, 1H), 2.74-2.63 (m, 3H), 2.31-2.15 (m, 1H).

<sup>13</sup>C NMR (100 MHz, CDCl<sub>3</sub>) δ 176.9, 141.4, 140.3, 138.2, 128.8, 127.5, 127.4, 127.0, 125.7, 81.0, 30.9, 28.9.

**HRMS** (ESI) calculated for C<sub>16</sub>H<sub>14</sub>NaO<sub>2</sub> [M+Na<sup>+</sup>]: 261.0886, found: 261.0880.

**FT-IR** (cm<sup>-1</sup>): 2921, 1698, 1179, 1141, 1031, 760, 688.

**MS** (EI) *m/z* (%): 238 (100), 183 (60), 152(48), 194 (26), 115 (18), 165 (14), 127 (8), 139 (5), 209 (3).

The ee value was determined by the chiral UPC<sup>2</sup> analysis (CHIRALPAK<sup>®</sup> OD-3, CO<sub>2</sub>/MeOH = 90/10, ν = 2.0 mL/min, λ = 205.0 nm), t<sub>b</sub> (minor) = 2.398 min, t<sub>b</sub> (major) = 2.620 min, t<sub>c</sub> (major) = 2.774 min, t<sub>c</sub> (minor) = 3.294 min

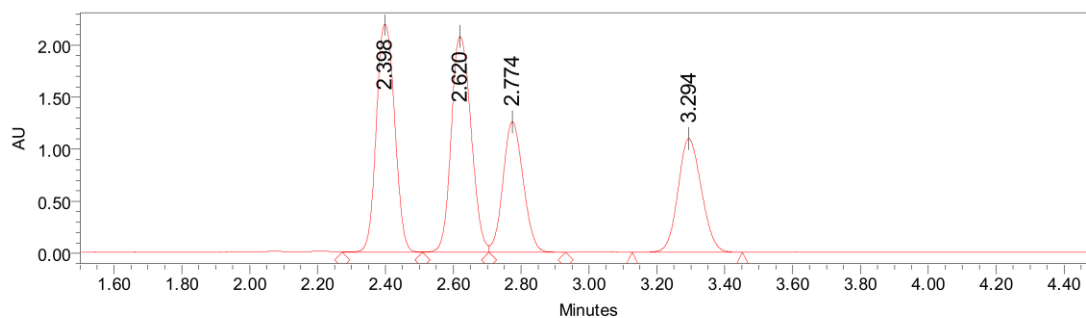

|   | RT    | Area    | % Area | Height  |
|---|-------|---------|--------|---------|
| 1 | 2.398 | 8208630 | 30.36  | 2190424 |
| 2 | 2.620 | 8437066 | 31.20  | 2071419 |
| 3 | 2.774 | 5180120 | 19.16  | 1254279 |
| 4 | 3.294 | 5215850 | 19.29  | 1093232 |

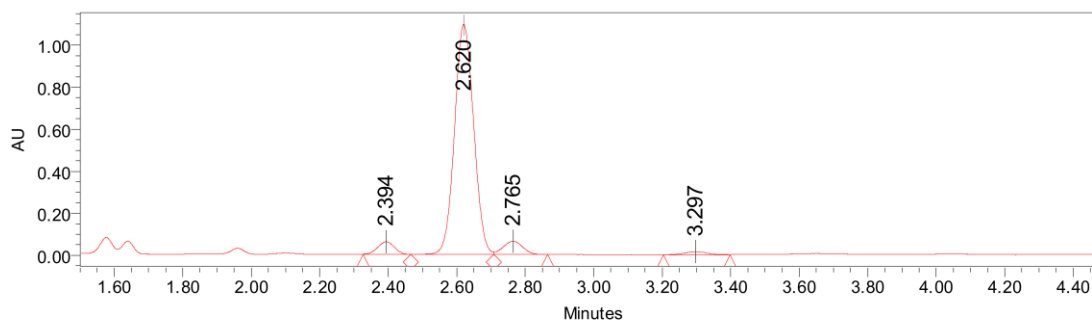

|   | RT    | Area    | % Area | Height  |
|---|-------|---------|--------|---------|
| 1 | 2.394 | 197317  | 4.16   | 59315   |
| 2 | 2.620 | 4240316 | 89.33  | 1094539 |
| 3 | 2.765 | 246361  | 5.19   | 62622   |
| 4 | 3.297 | 62562   | 1.32   | 13649   |

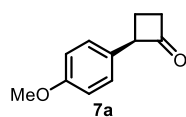

**(-)-2-(4-methoxyphenyl)cyclobutan-1-one (7a)**

Prepared according to **general procedure**: 28 h, 44% yield, 95.1% ee.

$[\alpha]_D^{27} = -15.0$  (c = 1.0, CHCl<sub>3</sub>)

The ee value was determined by the chiral UPC<sup>2</sup> analysis (CHIRALPAK<sup>®</sup> IG-3, CO<sub>2</sub>/MeOH = 98/02, v = 2.0 mL/min, λ = 225.0 nm), t (major) = 3.039 min, t (minor) = 3.742 min.

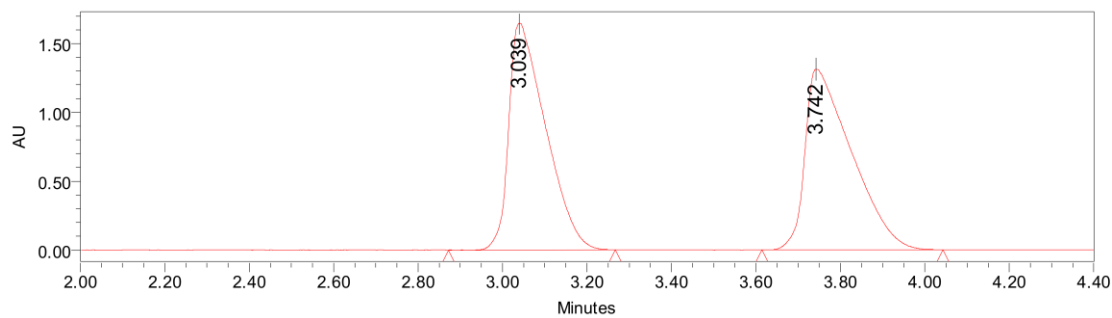

|   | RT    | Area     | % Area | Height  |
|---|-------|----------|--------|---------|
| 1 | 3.039 | 9977391  | 49.78  | 1647241 |
| 2 | 3.742 | 10064411 | 50.22  | 1311270 |

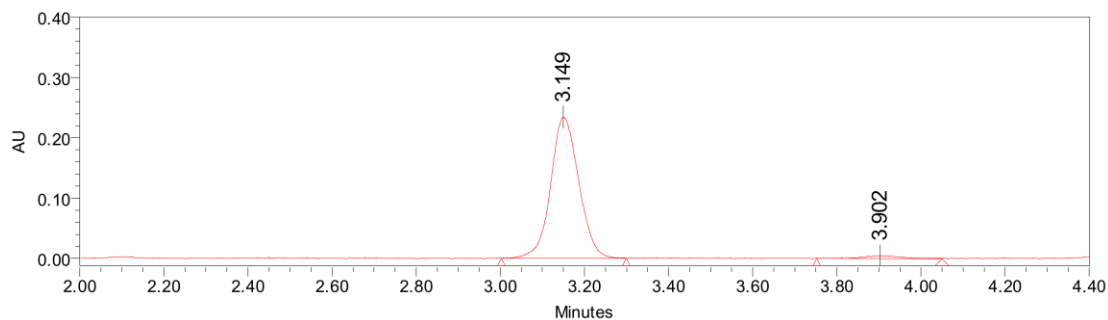

|   | RT    | Area    | % Area | Height |
|---|-------|---------|--------|--------|
| 1 | 3.149 | 1090260 | 97.55  | 233691 |
| 2 | 3.902 | 27386   | 2.45   | 4410   |

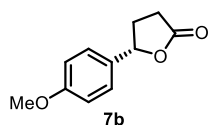

**(-)-5-(4-methoxyphenyl)dihydrofuran-2(3H)-one (7b)**

Prepared according to **general procedure**: 28 h, 54% yield, 90.8% ee, **7b/7c** = =16.6/1, white solid, m. p.: 51-52 °C.

$[\alpha]_D^{27} = -10.0$  (c = 1.0, CHCl<sub>3</sub>)

**<sup>1</sup>H NMR** (400 MHz, CDCl<sub>3</sub>) δ 7.30-7.23 (m, 2H), 6.95-6.88 (m, 2H), 5.46 (dd, *J* = 8.2, 6.2 Hz, 1H), 3.81 (s, 3H), 2.70-2.56 (m, 3H), 2.28-2.13 (m, 1H).

**<sup>13</sup>C NMR** (100 MHz, CDCl<sub>3</sub>) δ 176.9, 159.7, 131.1, 126.9, 114.0, 81.3, 55.3, 30.9, 29.2.

**HRMS** (ESI) calculated for C<sub>11</sub>H<sub>12</sub>NaO<sub>3</sub> [M+Na<sup>+</sup>]: 215.0679, found: 215.0676.

**FT-IR** (cm<sup>-1</sup>): 2957, 2838, 1770, 1516, 1250, 1175, 1142, 1031, 937.

**MS** (EI) *m/z* (%): 137 (100), 135 (50), 148 (48), 192 (48), 109 (20), 117 (12), 161 (6).

The ee value was determined by the chiral UPC<sup>2</sup> analysis (Trefoil<sup>®</sup> CEL 1, CO<sub>2</sub>/MeOH = 97/03, v = 2.0 mL/min, λ = 225.0 nm), t<sub>b</sub> (minor) = 3.595 min, t<sub>b</sub> (major) = 3.815 min, t<sub>c</sub> = 4.148 min.

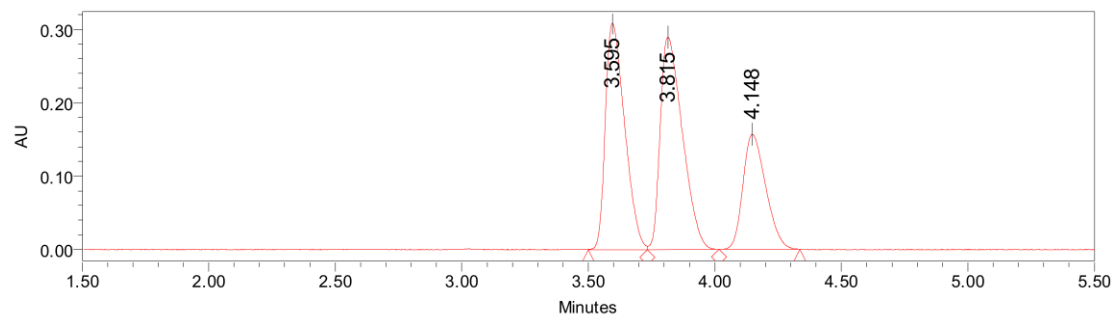

|   | RT    | Area    | % Area | Height |
|---|-------|---------|--------|--------|
| 1 | 3.595 | 1636959 | 37.29  | 308895 |
| 2 | 3.815 | 1762993 | 40.17  | 289510 |
| 3 | 4.148 | 989362  | 22.54  | 157271 |

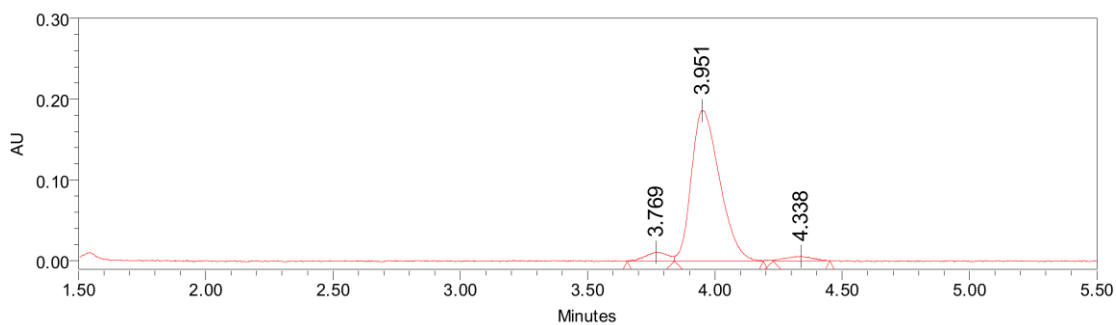

|   | RT    | Area    | % Area | Height |
|---|-------|---------|--------|--------|
| 1 | 3.769 | 69225   | 4.47   | 11067  |
| 2 | 3.951 | 1437893 | 92.88  | 186465 |
| 3 | 4.338 | 40918   | 2.64   | 5465   |

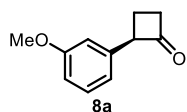

**(-)-2-(3-methoxyphenyl)cyclobutan-1-one (8a)**

Prepared according to **general procedure**: 38 h, 47% yield, 95.3% ee.

$[\alpha]_D^{25} = -9.0$  (c = 1.0, CHCl<sub>3</sub>)

The ee value was determined by the chiral UPC<sup>2</sup> analysis (CHIRALPAK<sup>®</sup> IG-3, CO<sub>2</sub>/MeOH = 98/02, v = 2.0 mL/min, λ = 205.0 nm), t (major) = 3.299 min, t (minor) = 3.738 min.

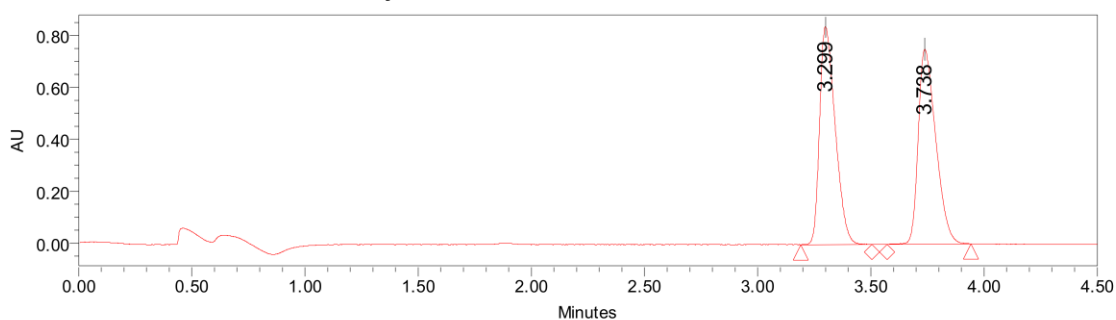

|   | RT    | Area    | % Area | Height |
|---|-------|---------|--------|--------|
| 1 | 3.299 | 4011830 | 49.75  | 839849 |
| 2 | 3.738 | 4052192 | 50.25  | 750403 |

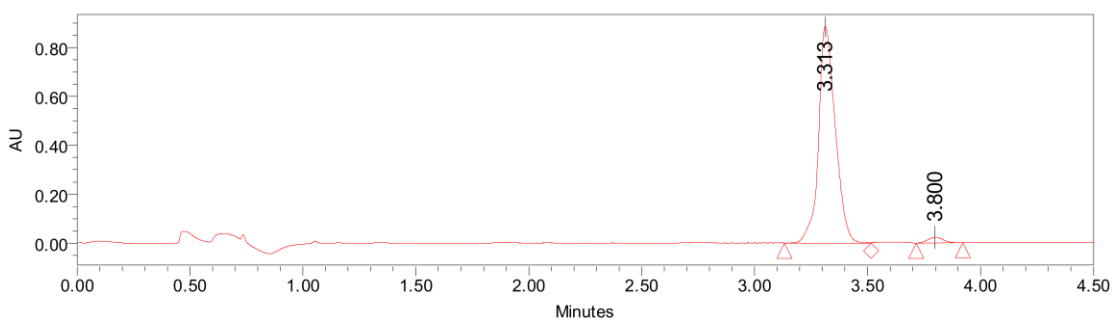

|   | RT    | Area    | % Area | Height |
|---|-------|---------|--------|--------|
| 1 | 3.313 | 4560918 | 97.64  | 887731 |
| 2 | 3.800 | 110220  | 2.36   | 23407  |

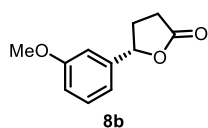

**(-)-5-(3-methoxyphenyl)dihydrofuran-2(3H)-one (8b)**

Prepared according to **general procedure**: 38 h, 51% yield, 90.7% ee, **8b/8c** = 12.4/1, colorless liquid.

$[\alpha]_D^{28} = -27.0$  (c = 1.0, CHCl<sub>3</sub>)

<sup>1</sup>H NMR (400 MHz, CDCl<sub>3</sub>) δ 7.34-7.28 (m, 1H), 6.93-6.85 (m, 3H), 5.53-5.45 (m, 1H), 3.82 (s, 3H), 2.72-2.60 (m, 3H), 2.26-2.12 (m, 1H).

<sup>13</sup>C NMR (100 MHz, CDCl<sub>3</sub>) δ 176.9, 159.9, 141.0, 129.8, 117.3, 113.8, 110.7, 81.0, 55.3, 30.9, 28.9.

HRMS (ESI) calculated for C<sub>11</sub>H<sub>12</sub>NaO<sub>3</sub> [M+Na<sup>+</sup>]: 215.0679, found: 215.0674.

FT-IR (cm<sup>-1</sup>): 3405, 2951, 2837, 1774, 1603, 1457, 1299, 1180, 1140, 1029, 907.

MS (EI) *m/z* (%): 192 (100), 137 (82), 135 (70), 109 (40), 148 (25), 161 (15), 117 (15).

The ee value was determined by the chiral UPC<sup>2</sup> analysis (CHIRALPAK<sup>®</sup> IC-3, CO<sub>2</sub>/MeOH = 95/05, *v* = 2.0 mL/min, λ = 205.0 nm), *t*<sub>b</sub> (minor) = 3.287 min, *t*<sub>b</sub> (major) = 3.464 min, *t*<sub>c</sub> (minor) = 4.836 min, *t*<sub>c</sub> (major) = 5.274 min.

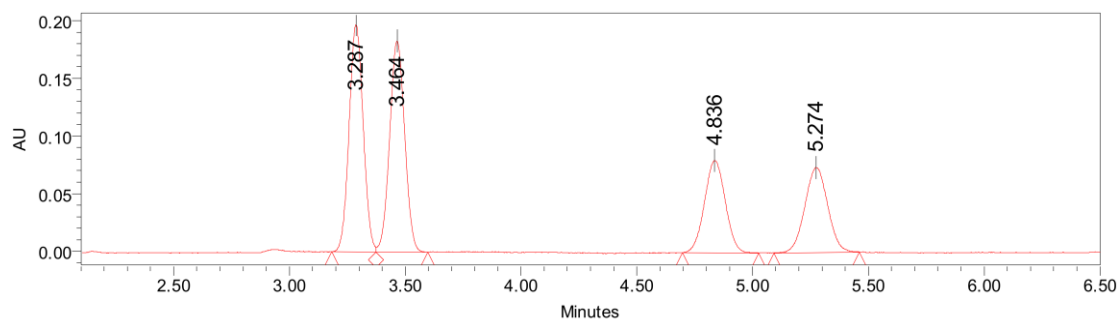

|   | RT    | Area   | % Area | Height |
|---|-------|--------|--------|--------|
| 1 | 3.287 | 834967 | 31.23  | 197127 |
| 2 | 3.464 | 830035 | 31.05  | 182979 |
| 3 | 4.836 | 503359 | 18.83  | 80080  |
| 4 | 5.274 | 504917 | 18.89  | 73811  |

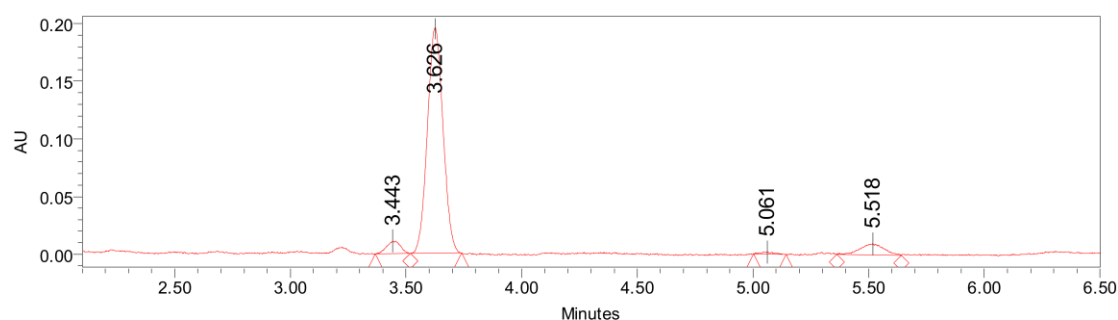

|   | RT    | Area   | % Area | Height |
|---|-------|--------|--------|--------|
| 1 | 3.443 | 44932  | 4.32   | 10984  |
| 2 | 3.626 | 917499 | 88.23  | 195221 |
| 3 | 5.061 | 8063   | 0.78   | 1920   |
| 4 | 5.518 | 69429  | 6.68   | 9664   |

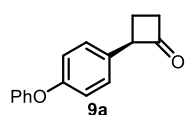

**(-)-2-(4-phenoxyphenyl)cyclobutan-1-one (9a)**

Prepared according to **general procedure**: 36 h, 45% yield, 99.9% ee.

[α]<sub>D</sub><sup>29</sup> = -16.0 (c = 1.0, CHCl<sub>3</sub>)

The ee value was determined by the chiral UPC<sup>2</sup> analysis (CHIRALPAK<sup>®</sup> IG-3, CO<sub>2</sub>/MeOH = 95/05, *v* = 2.0 mL/min, λ = 214.5 nm), *t* (minor) = 3.549 min, *t* (major) = 3.745 min.

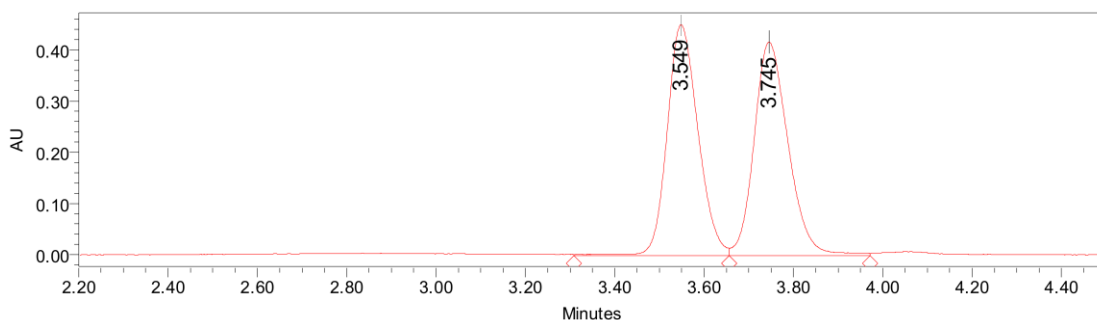

|   | RT    | Area    | % Area | Height |
|---|-------|---------|--------|--------|
| 1 | 3.549 | 2166847 | 49.60  | 450865 |
| 2 | 3.745 | 2201742 | 50.40  | 416480 |

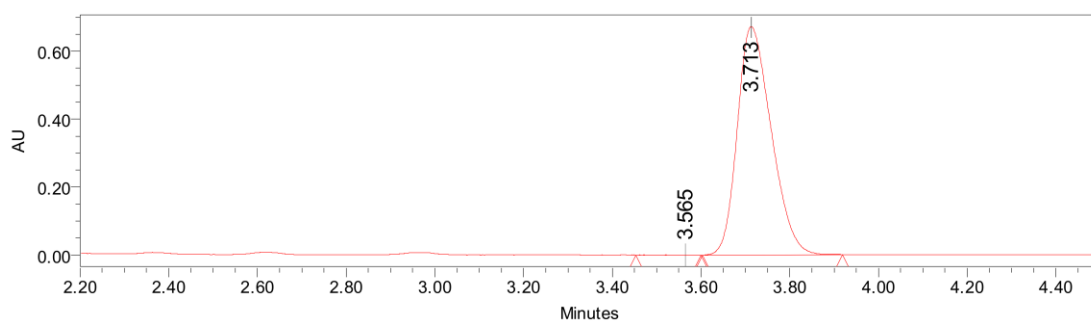

|   | RT    | Area    | % Area | Height |
|---|-------|---------|--------|--------|
| 1 | 3.565 | 1538    | 0.04   | -375   |
| 2 | 3.713 | 3569582 | 99.96  | 672108 |

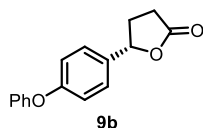

**(-)-5-(4-phenoxyphenyl)dihydrofuran-2(3H)-one (9b)**

Prepared according to **general procedure**: 36 h, 48% yield, 93.2% ee, **9b/9c** = 12.5/1, white solid, m. p.: 59-61 °C.

$[\alpha]_D^{29} = -6.0$  (c = 1.0, CHCl<sub>3</sub>)

**<sup>1</sup>H NMR** (600 MHz, CDCl<sub>3</sub>) δ 7.35 (t, *J* = 7.8 Hz, 2H), 7.30 (d, *J* = 9.0 Hz, 2H), 7.13 (t, *J* = 7.2 Hz, 1H), 7.01 (d, *J* = 9.0 Hz, 4H), 5.52-5.45 (m, 1H), 2.69-2.60 (m, 3H), 2.26-2.14 (m, 1H).

**<sup>13</sup>C NMR** (150 MHz, CDCl<sub>3</sub>) δ 176.7, 157.6, 156.7, 133.8, 129.8, 127.0, 123.6, 119.1, 118.8, 81.0, 30.9, 29.1.

**HRMS** (ESI) calculated for C<sub>16</sub>H<sub>14</sub>NaO<sub>3</sub> [M+Na<sup>+</sup>]: 277,0835, found: 77.0826.

**FT-IR** (cm<sup>-1</sup>): 3440, 2924, 1773, 1589, 1489, 1238, 1168, 1022.

**MS** (EI) *m/z* (%): 254 (100), 199 (30), 255 (16), 210 (10), 117 (9), 115 (7).

the ee value was determined by the chiral UPC<sup>2</sup> analysis (CHIRALPAK® IG-3, CO<sub>2</sub>/MeOH = 90/10, v = 2.0 mL/min, λ = 205 nm), t<sub>b</sub> (minor) = 6.443 min, t<sub>b</sub> (major) = 6.836 min, t<sub>c</sub> = 5.544 min.

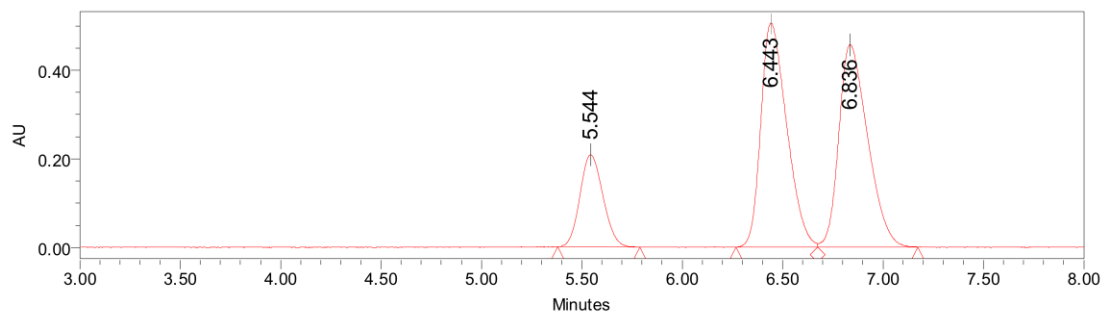

|   | RT    | Area    | % Area | Height |
|---|-------|---------|--------|--------|
| 1 | 5.544 | 1668475 | 15.49  | 208570 |
| 2 | 6.443 | 4545561 | 42.21  | 506264 |
| 3 | 6.836 | 4555779 | 42.30  | 456865 |

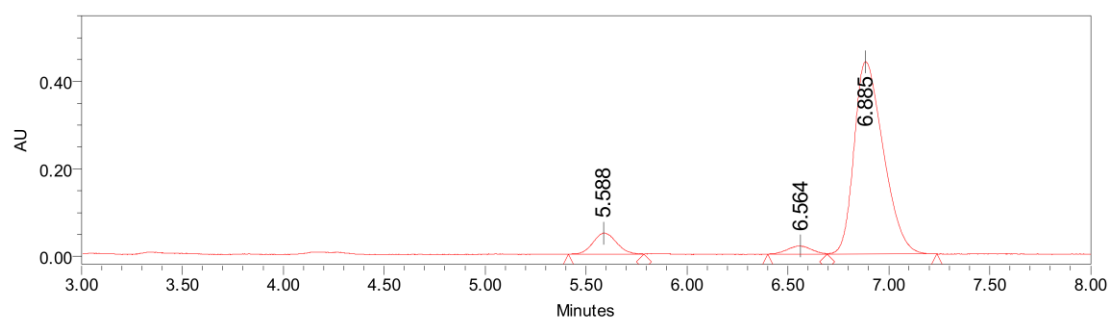

|   | RT    | Area    | % Area | Height |
|---|-------|---------|--------|--------|
| 1 | 5.588 | 399678  | 8.02   | 48530  |
| 2 | 6.564 | 155119  | 3.11   | 18423  |
| 3 | 6.885 | 4427498 | 88.86  | 440377 |

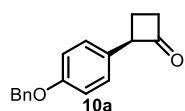

**(-)-2-(4-(benzyloxy)phenyl)cyclobutan-1-one (10a)**

Prepared according to **general procedure**: 39 h, 43% yield, 99.4% ee.

$[\alpha]_D^{29} = -11.0$  (c = 1.0, CHCl<sub>3</sub>)

The ee value was determined by the chiral UPC<sup>2</sup> analysis (CHIRALPAK<sup>®</sup> IG-3, CO<sub>2</sub>/MeOH = 90/10, v = 2.0 mL/min,  $\lambda = 205.0$  nm), t (major) = 4.778 min, t (minor) = 5.934 min.

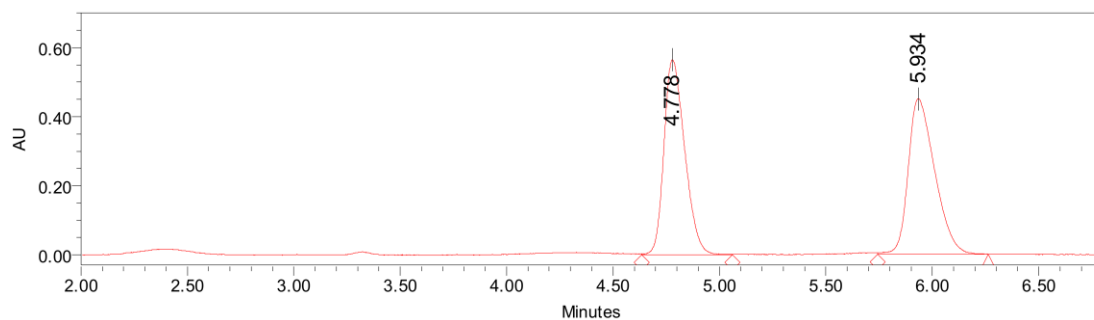

|   | RT    | Area    | % Area | Height |
|---|-------|---------|--------|--------|
| 1 | 4.778 | 3821345 | 49.49  | 564208 |
| 2 | 5.934 | 3900496 | 50.51  | 449052 |

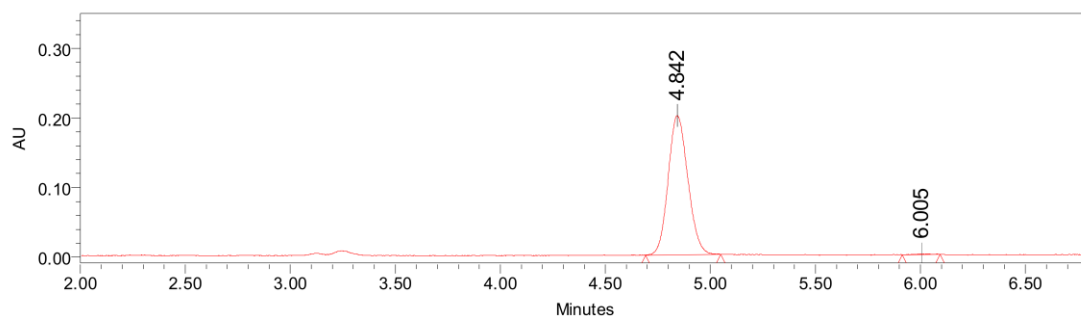

|   | RT    | Area    | % Area | Height |
|---|-------|---------|--------|--------|
| 1 | 4.842 | 1301146 | 99.70  | 200114 |
| 2 | 6.005 | 3884    | 0.30   | 886    |

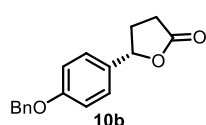

**(-)-5-(4-(benzyloxy)phenyl)dihydrofuran-2(3H)-one (10b)**

Prepared according to **general procedure**: 39 h, 52% yield, 87.5% ee, **10b/10c** = 13.0/1, white solid, m. p.: 86-90 °C.

$[\alpha]_D^{29} = -9.0$  (c = 1.0, CHCl<sub>3</sub>)

**<sup>1</sup>H NMR** (600 MHz, CDCl<sub>3</sub>) δ 7.42 (d, *J* = 7.2 Hz, 2H), 7.38 (t, *J* = 7.5 Hz, 2H), 7.32 (t, *J* = 7.2 Hz, 1H), 7.25 (d, *J* = 8.4 Hz, 2H), 7.01-6.95 (m, 2H), 5.44 (dd, *J* = 8.1, 6.3 Hz, 1H), 5.06 (s, 2H), 2.67-2.55 (m, 3H), 2.23-2.13 (m, 1H).

**<sup>13</sup>C NMR** (150 MHz, CDCl<sub>3</sub>) δ 176.9, 158.9, 136.7, 131.4, 128.6, 128.0, 127.4, 126.9, 115.0, 81.2, 70.0, 30.8, 29.1.

**HRMS** (ESI) calculated for C<sub>17</sub>H<sub>16</sub>NaO<sub>3</sub> [M+Na<sup>+</sup>]: 291.0992, found: 291.0984.

**FT-IR** (cm<sup>-1</sup>): 3406, 2924, 1614, 1516, 1314, 1175, 1155, 1013, 936, 740.

**MS** (EI) *m/z* (%): 268 (100), 103 (14), 115 (13), 137 (10), 192 (10), 254 (4).

The ee value was determined by the chiral UPC2 analysis (CHIRALPAK<sup>®</sup> IC-3, CO<sub>2</sub>/MeOH = 95/05, v = 2.0 mL/min, λ = 204.3 nm), *t<sub>b</sub>* (minor) = 4.998 min, *t<sub>b</sub>* (major) = 6.000 min, *t<sub>c</sub>* (minor) = 5.326 min, *t<sub>c</sub>* (major) = 5.768 min.

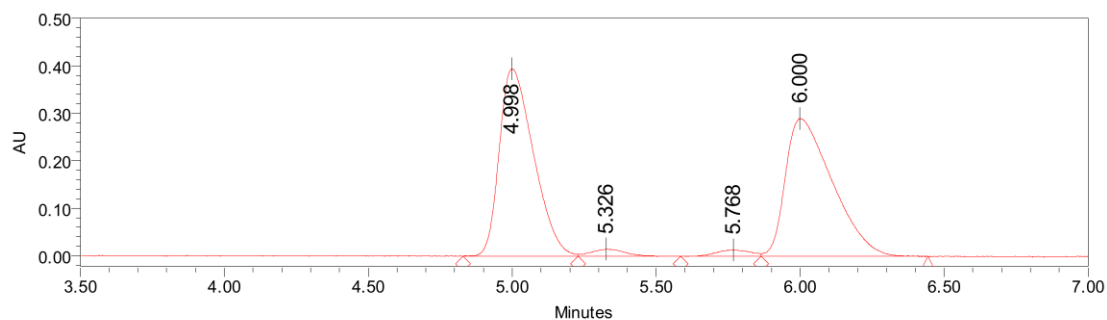

|   | RT    | Area    | % Area | Height |
|---|-------|---------|--------|--------|
| 1 | 4.998 | 3267246 | 48.16  | 394477 |
| 2 | 5.326 | 122795  | 1.81   | 14972  |
| 3 | 5.768 | 109954  | 1.62   | 13450  |
| 4 | 6.000 | 3284089 | 48.41  | 290156 |



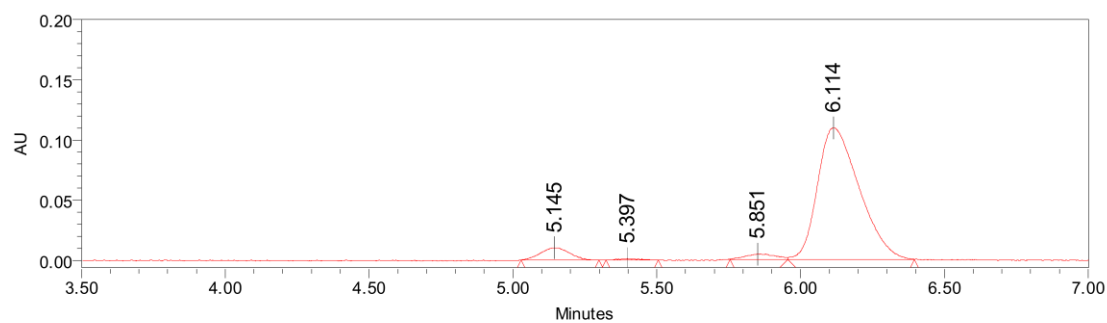

|   | RT    | Area    | % Area | Height |
|---|-------|---------|--------|--------|
| 1 | 5.145 | 72882   | 6.03   | 10330  |
| 2 | 5.397 | 5027    | 0.42   | 992    |
| 3 | 5.851 | 31870   | 2.64   | 4350   |
| 4 | 6.114 | 1098965 | 90.92  | 109402 |

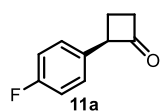

**(-)-2-(4-fluorophenyl)cyclobutan-1-one (11a)**

Prepared according to **indicated procedure b**: 39 h, 49% yield, 81.6% ee.

$[\alpha]_D^{24} = -16.0$  (c = 1.0, CHCl<sub>3</sub>)

The ee value was determined by the chiral UPC<sup>2</sup> analysis (CHIRALPAK<sup>®</sup> IG-3, CO<sub>2</sub>/MeOH = 98/02, v = 2.0 mL/min,  $\lambda = 215.0$  nm), t (major) = 1.155 min, t (minor) = 1.324 min.

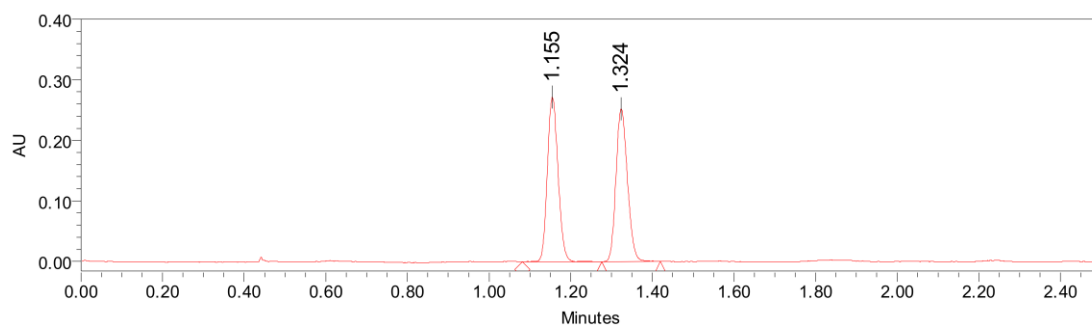

|   | RT    | Area   | % Area | Height |
|---|-------|--------|--------|--------|
| 1 | 1.155 | 500518 | 50.34  | 272168 |
| 2 | 1.324 | 493711 | 49.66  | 252697 |

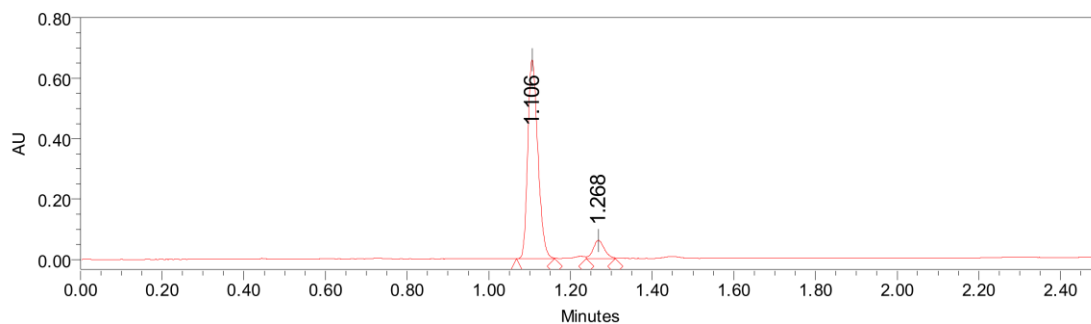

|   | RT    | Area    | % Area | Height |
|---|-------|---------|--------|--------|
| 1 | 1.106 | 1132794 | 90.83  | 658774 |
| 2 | 1.268 | 114335  | 9.17   | 60073  |

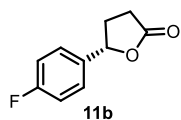

**(S)-5-(4-fluorophenyl)dihydrofuran-2(3H)-one (11b)**

Prepared according to **indicated procedure b**: 39 h, 50% yield, 91.7% ee, **11b/11c** = 6.3/1, colorless liquid.

$[\alpha]_D^{24} = -15.0$  (c = 1.0, CHCl<sub>3</sub>)

**<sup>1</sup>H NMR** (600 MHz, CDCl<sub>3</sub>) δ 7.36-7.29 (m, 2H), 7.15-7.04 (m, 2H), 5.49 (dd, *J* = 8.1, 6.3 Hz, 1H), 2.74-2.61 (m, 3H), 2.25-2.11 (m, 1H).

**<sup>13</sup>C NMR** (150 MHz, CDCl<sub>3</sub>) δ 176.6, 162.6 (d, *J* = 246 Hz), 135.1 (d, *J* = 3.2 Hz), 127.2 (d, *J* = 8.6 Hz), 115.7 (d, *J* = 21.5 Hz), 80.6, 31.0, 29.0.

**<sup>19</sup>F NMR** (376 MHz, CDCl<sub>3</sub>) δ -113.31.

**HRMS** (ESI) calculated for C<sub>10</sub>H<sub>9</sub>NaO<sub>2</sub>F [M+Na<sup>+</sup>]: 203.0479, found: 203.0479.

**FT-IR** (cm<sup>-1</sup>): 2924, 1770, 1513, 1226, 1140, 1022, 939, 837.

**MS** (EI) *m/z* (%): 56 (100), 125 (60), 135 (50), 95 (45), 180 (38), 109 (34).

The ee value was determined by the chiral UPC<sup>2</sup> analysis (CHIRALPAK<sup>®</sup> IC-3, CO<sub>2</sub>/MeOH = 98/02, *v* = 2.0 mL/min, λ = 210.0 nm), *t*<sub>b</sub> (minor) = 4.155 min, *t*<sub>b</sub> (major) = 4.430 min, *t*<sub>c</sub> (minor) = 5.099 min, *t*<sub>c</sub> (major) = 5.263 min.

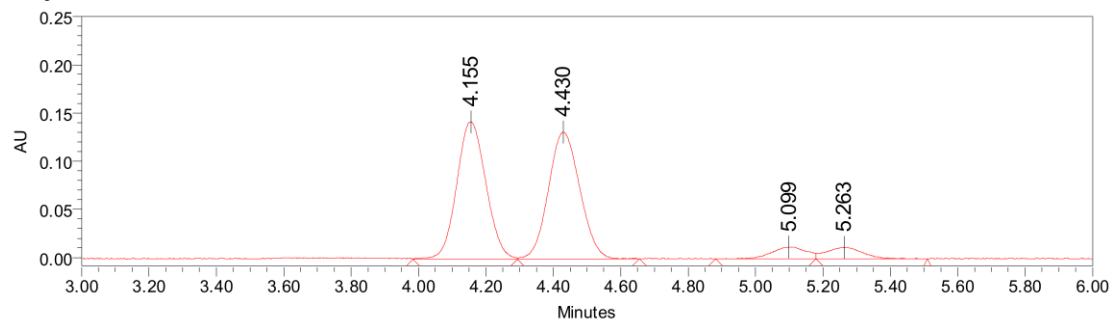

|   | RT    | Area   | % Area | Height |
|---|-------|--------|--------|--------|
| 1 | 4.155 | 857264 | 45.32  | 142544 |
| 2 | 4.430 | 854291 | 45.16  | 131876 |
| 3 | 5.099 | 89846  | 4.75   | 12446  |
| 4 | 5.263 | 90245  | 4.77   | 11992  |

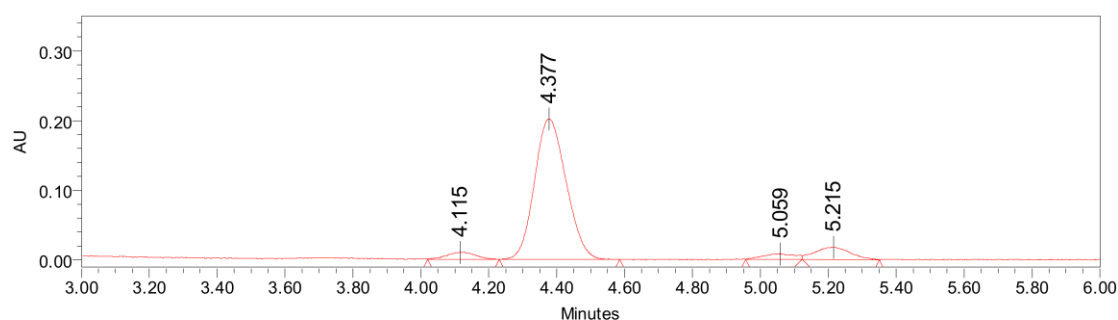

|   | RT    | Area    | % Area | Height |
|---|-------|---------|--------|--------|
| 1 | 4.115 | 56831   | 3.69   | 10018  |
| 2 | 4.377 | 1306970 | 84.76  | 201630 |
| 3 | 5.059 | 51205   | 3.32   | 7709   |
| 4 | 5.215 | 126941  | 8.23   | 17655  |

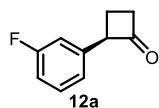

**(-)-2-(3-fluorophenyl)cyclobutan-1-one (12a)**

Prepared according to **indicated procedure b**: 39 h, 48% yield, 88.4% ee.

$[\alpha]_D^{24} = -39.0$  (c = 1.0, CHCl<sub>3</sub>)

The ee value was determined by the chiral UPC<sup>2</sup> analysis (CHIRALPAK<sup>®</sup> IG-3, CO<sub>2</sub>/MeOH = 98/02, v = 2.0 mL/min, λ = 215.0 nm), t (major) = 1.240 min, t (minor) = 1.390 min.

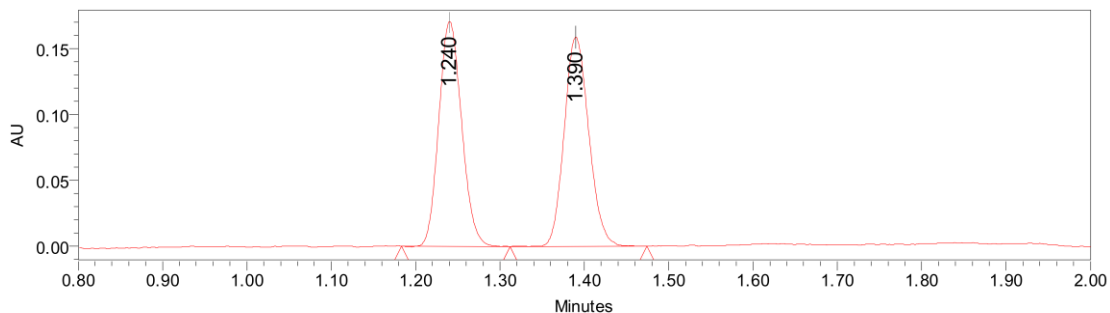

|   | RT    | Area   | % Area | Height |
|---|-------|--------|--------|--------|
| 1 | 1.240 | 321280 | 49.88  | 170652 |
| 2 | 1.390 | 322869 | 50.12  | 158953 |

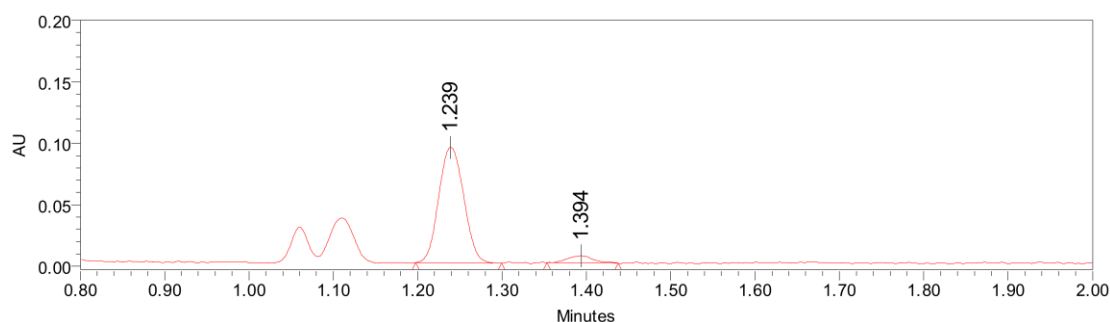

|   | RT    | Area   | % Area | Height |
|---|-------|--------|--------|--------|
| 1 | 1.239 | 193588 | 94.18  | 94023  |
| 2 | 1.394 | 11974  | 5.82   | 5820   |

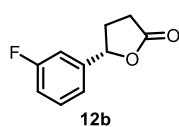

**(-)-5-(3-fluorophenyl)dihydrofuran-2(3H)-one (12b)**

Prepared according to **indicated procedure b**: 39 h, 50% yield, 90.8% ee, **12b/12c** = 5.0/1, yellow liquid.

$[\alpha]_D^{24} = -19.0$  (c = 1.0, CHCl<sub>3</sub>)

<sup>1</sup>H NMR (400 MHz, CDCl<sub>3</sub>) δ 7.42-7.32 (m, 1H), 7.15-6.99 (m, 3H), 5.57-5.45 (m, 1H), 2.78-2.61 (m, 3H), 2.25-2.11 (m, 1H).

<sup>13</sup>C NMR (150 MHz, CDCl<sub>3</sub>) δ 176.5, 162.9 (d, J = 245.7 Hz), 142.0 (d, J = 7.2 Hz), 130.5 (d, J = 3.8 Hz), 120.72 (d, J = 3.0 Hz), 115.3 (d, J = 20.9 Hz), 112.3 (d, J = 22.7 Hz), 80.2, 30.8, 28.7.

<sup>19</sup>F NMR (376 MHz, CDCl<sub>3</sub>) δ -111.93.

HRMS (ESI) calculated for C<sub>10</sub>H<sub>10</sub>O<sub>2</sub>F [M+H<sup>+</sup>]: 181.0659, found: 181.0659.

FT-IR (cm<sup>-1</sup>): 2924, 1773, 1292, 1181, 1140, 1024, 911, 798.

MS (EI) m/z (%): 56 (100), 123 (66), 180 (180), 135 (40), 95 (38), 109 (24), 115 (18).

The ee value was determined by the chiral UPC<sup>2</sup> analysis (CHIRALPAK<sup>®</sup> IC-3, CO<sub>2</sub>/MeOH = 97/03, v = 2.0 mL/min, λ = 213.0 nm), t<sub>b</sub> (minor) = 2.479 min, t<sub>b</sub> (major) = 2.718 min, t<sub>c</sub> (minor) = 3.261 min, t<sub>c</sub> (major) = 3.396 min.

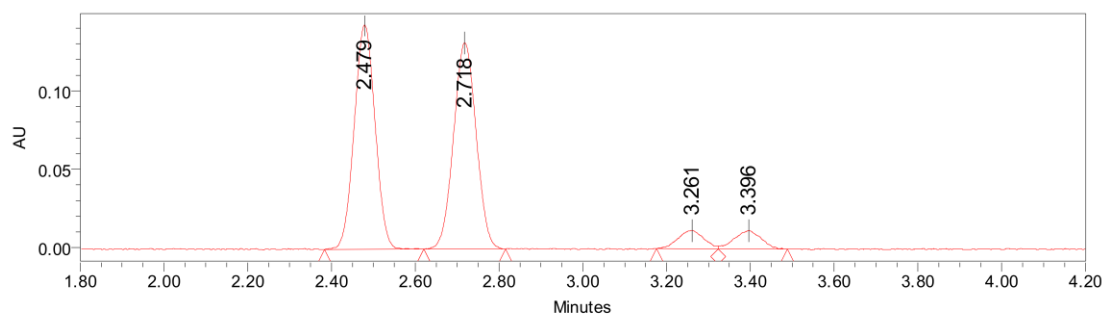

|   | RT    | Area   | % Area | Height |
|---|-------|--------|--------|--------|
| 1 | 2.479 | 495979 | 45.38  | 142961 |
| 2 | 2.718 | 494122 | 45.21  | 131418 |
| 3 | 3.261 | 50005  | 4.58   | 11640  |
| 4 | 3.396 | 52753  | 4.83   | 11841  |

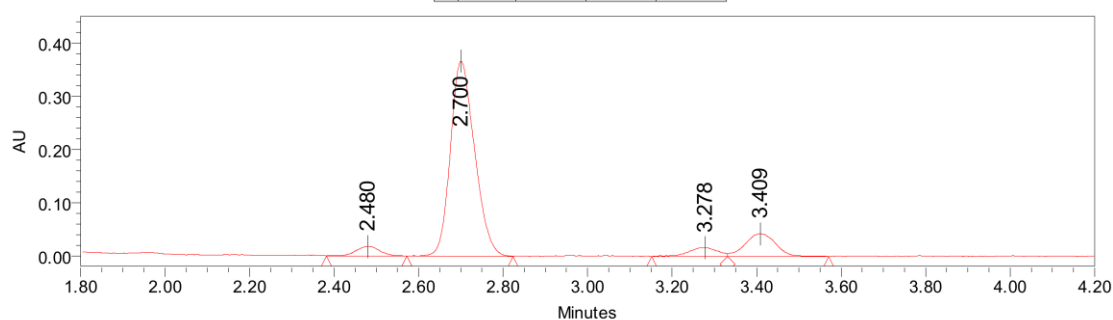

|   | RT    | Area    | % Area | Height |
|---|-------|---------|--------|--------|
| 1 | 2.480 | 70187   | 3.86   | 17818  |
| 2 | 2.700 | 1456352 | 80.06  | 366444 |
| 3 | 3.278 | 79368   | 4.36   | 16166  |
| 4 | 3.409 | 213132  | 11.72  | 42503  |

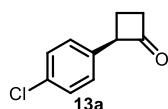

**(-)-2-(4-chlorophenyl)cyclobutan-1-one (13a)**

Prepared according to **indicated procedure b**: 36 h, 43% yield, 86.7% ee.

$[\alpha]_D^{24} = -23.0$  (c = 1.0, CHCl<sub>3</sub>)

The ee value was determined by the chiral UPC<sup>2</sup> analysis (CHIRALPAK<sup>®</sup> IG-3, CO<sub>2</sub>/MeOH = 98/02, v = 2.0 mL/min, λ = 214.7 nm), t (major) = 2.179 min, t (minor) = 2.782 min.

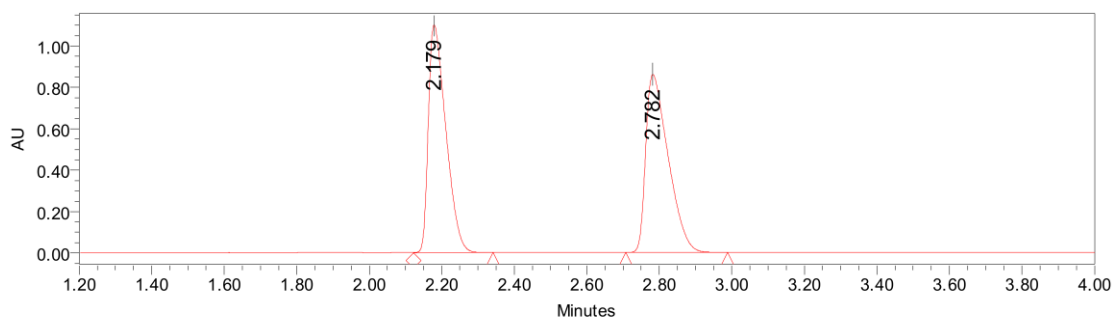

|   | RT    | Area    | % Area | Height  |
|---|-------|---------|--------|---------|
| 1 | 2.179 | 3694403 | 49.95  | 1099739 |
| 2 | 2.782 | 3701462 | 50.05  | 860402  |

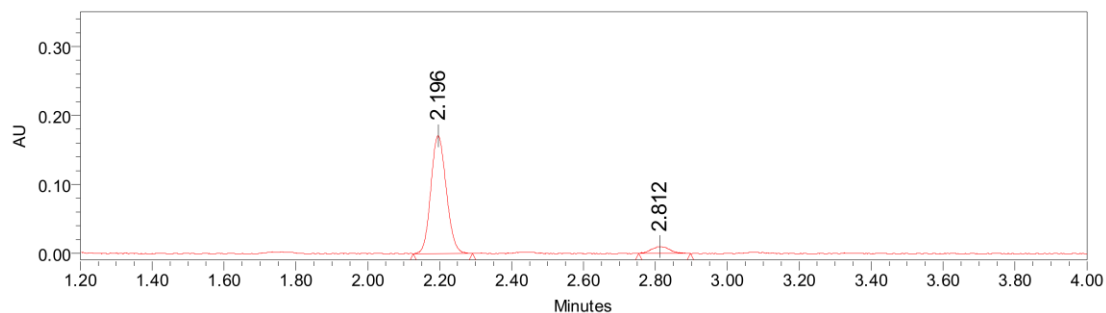

|   | RT    | Area   | % Area | Height |
|---|-------|--------|--------|--------|
| 1 | 2.196 | 508047 | 93.35  | 170870 |
| 2 | 2.812 | 36179  | 6.65   | 9976   |

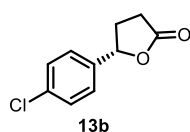

**(-)-5-(4-chlorophenyl)dihydrofuran-2(3H)-one (13b)**

Prepared according to **indicated procedure b**: 36 h, 56% yield, 92.3% ee, **13b/13c** = 5.9/1, white solid, m. p.: 47-49 °C.

$[\alpha]_D^{24} = -28.0$  (c = 1.0, CHCl<sub>3</sub>)

<sup>1</sup>H NMR (400 MHz, CDCl<sub>3</sub>) δ 7.43-7.33 (m, 2H), 7.34-7.22 (m, 2H), 5.48 (dd, *J* = 8.2, 6.2 Hz, 1H), 2.76-2.59 (m, 3H), 2.26-2.05 (m, 1H).

<sup>13</sup>C NMR (100 MHz, CDCl<sub>3</sub>) δ 176.5, 137.8, 134.2, 128.9, 126.6, 80.4, 30.9, 28.8.

HRMS (ESI) calculated for C<sub>10</sub>H<sub>10</sub>O<sub>2</sub>Cl [M+H<sup>+</sup>]: 197.0364, found: 197.0363.

FT-IR (cm<sup>-1</sup>): 2924, 1770, 1493, 1173, 1139, 1013, 938, 806.

MS (EI) *m/z* (%): 56 (100), 141 (80), 161 (40), 117 (14), 115 (40), 196 (30), 197 (10).

The ee value was determined by the chiral UPC<sup>2</sup> analysis (Trefoil<sup>®</sup> CEL 1, CO<sub>2</sub>/MeOH = 98/02, v = 2.0 mL/min, λ = 219.0 nm), t<sub>b</sub> (minor) = 4.472 min, t<sub>b</sub> (major) = 4.770 min, t<sub>c</sub> (minor) = 5.903 min, t<sub>c</sub> (major) = 6.374 min.

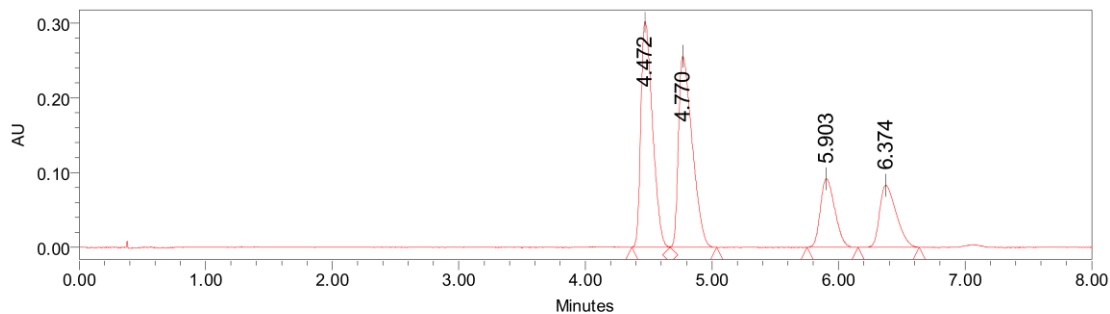

|   | RT    | Area    | % Area | Height |
|---|-------|---------|--------|--------|
| 1 | 4.472 | 1919902 | 35.98  | 302153 |
| 2 | 4.770 | 1922332 | 36.03  | 255519 |
| 3 | 5.903 | 730506  | 13.69  | 91928  |
| 4 | 6.374 | 762840  | 14.30  | 83269  |

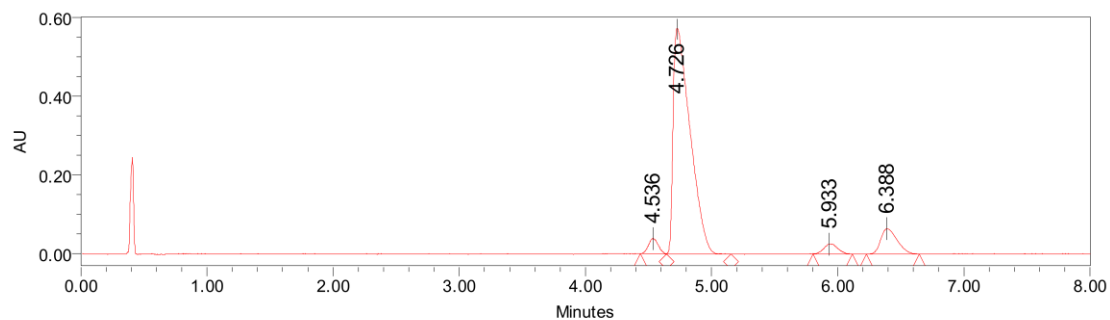

|   | RT    | Area    | % Area | Height |
|---|-------|---------|--------|--------|
| 1 | 4.536 | 210529  | 3.34   | 38680  |
| 2 | 4.726 | 5311576 | 84.21  | 572443 |
| 3 | 5.933 | 197564  | 3.13   | 25475  |
| 4 | 6.388 | 587747  | 9.32   | 64711  |

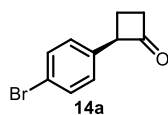

**(-)-2-(4-bromophenyl)cyclobutan-1-one (14a)**

Prepared according to **indicated procedure b**: 38 h, 45% yield, 85.3% ee.

$[\alpha]_D^{24} = -22.0$  ( $c = 1.0$ ,  $\text{CHCl}_3$ )

The ee value was determined by the chiral UPC<sup>2</sup> analysis (CHIRALPAK<sup>®</sup> IG-3,  $\text{CO}_2/\text{MeOH} = 99/01$ ,  $v = 2.0$  mL/min,  $\lambda = 225.0$  nm),  $t$  (major) = 4.954 min,  $t$  (minor) = 6.782 min.

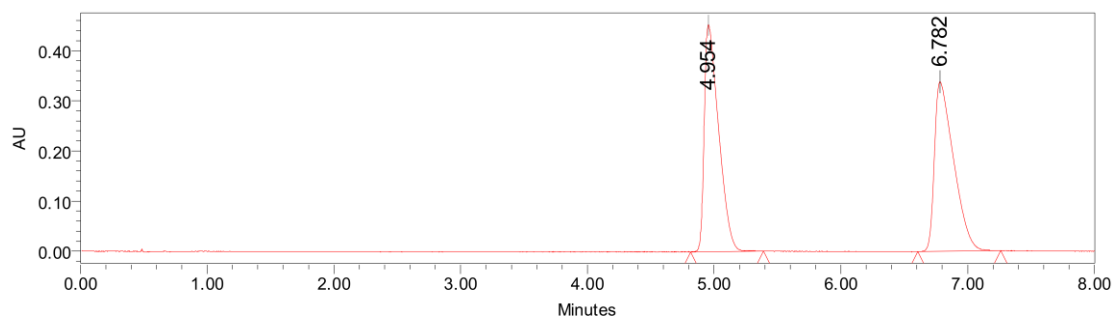

|   | RT    | Area    | % Area | Height |
|---|-------|---------|--------|--------|
| 1 | 4.954 | 3559735 | 49.98  | 453550 |
| 2 | 6.782 | 3563232 | 50.02  | 338465 |

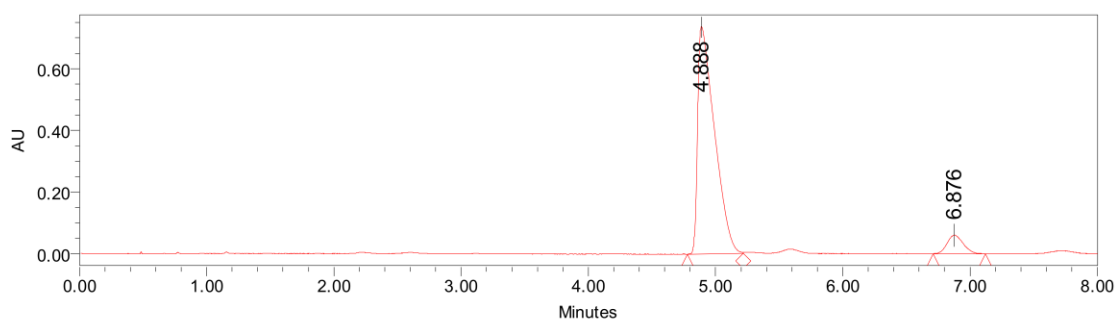

|   | RT    | Area    | % Area | Height |
|---|-------|---------|--------|--------|
| 1 | 4.888 | 6775718 | 92.68  | 738203 |
| 2 | 6.876 | 535540  | 7.32   | 60534  |

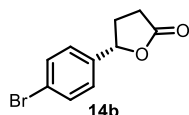

**(-)-5-(4-bromophenyl)dihydrofuran-2(3H)-one (14b)**

Prepared according to **indicated procedure b**: 38 h, 50% yield, 92.4% ee, **14b/14c**

= 6.3/1, white solid, m. p.: 79-82 °C.

$[\alpha]_D^{24} = -24.0$  (c = 1.0, CHCl<sub>3</sub>)

<sup>1</sup>H NMR (400 MHz, CDCl<sub>3</sub>) δ 7.57-7.47 (m, 2H), 7.26-7.17 (m, 2H), 5.52-5.41 (m, 1H), 2.75-2.58 (m, 3H), 2.24-2.07 (m, 1H).

<sup>13</sup>C NMR (100 MHz, CDCl<sub>3</sub>) δ 176.5, 138.4, 131.9, 126.9, 122.3, 80.4, 30.9, 28.8.

HRMS (ESI) calculated for C<sub>10</sub>H<sub>10</sub>O<sub>2</sub>Br [M+H<sup>+</sup>]: 240.9859, 242.9838, found: 240.9858, 242.9838.

FT-IR (cm<sup>-1</sup>): 2914, 1760, 1698, 1415, 1176, 1008, 804, 746.

MS (EI) m/z (%): 56 (100), 161 (70), 185 (40), 115 (40), 242 (30), 240 (20), 157 (20).

The ee value was determined by the chiral UPC<sup>2</sup> analysis (Trefoil<sup>®</sup> CEL 1, CO<sub>2</sub>/MeOH = 95/05, v = 2.0 mL/min, λ = 220.0 nm), t<sub>b</sub> (minor) = 3.070 min, t<sub>b</sub> (major) = 3.272 min, t<sub>c</sub> (minor) = 3.804 min, t<sub>c</sub> (major) = 4.214 min.

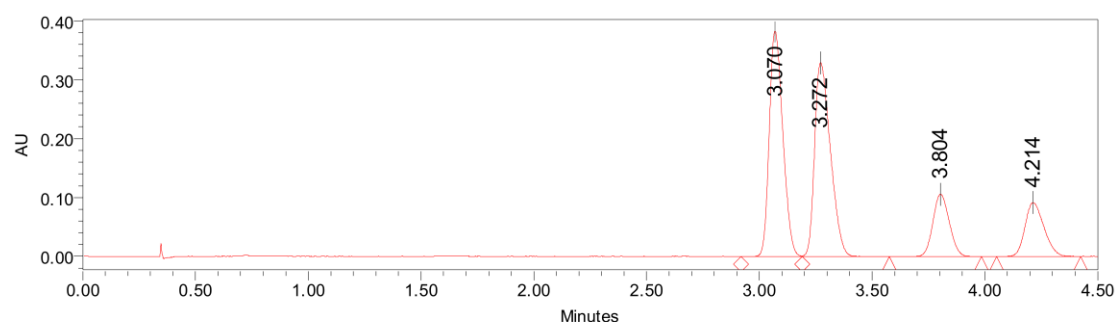

|   | RT    | Area    | % Area | Height |
|---|-------|---------|--------|--------|
| 1 | 3.070 | 1602654 | 37.42  | 383291 |
| 2 | 3.272 | 1603435 | 37.44  | 329410 |
| 3 | 3.804 | 540253  | 12.61  | 106243 |
| 4 | 4.214 | 536554  | 12.53  | 91705  |

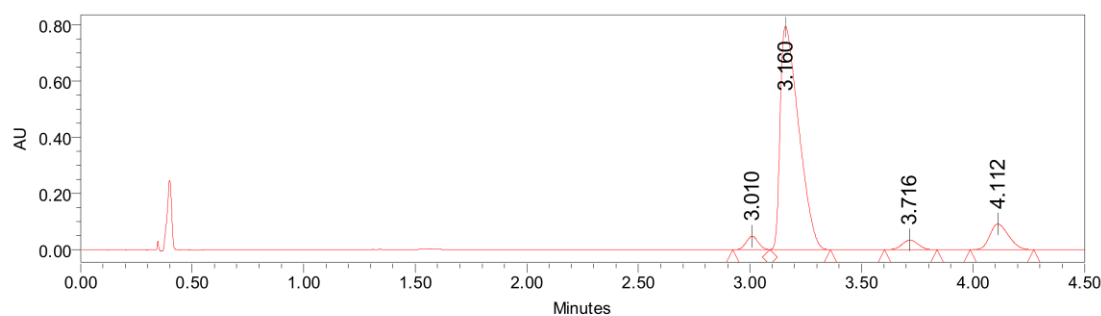

|   | RT    | Area    | % Area | Height |
|---|-------|---------|--------|--------|
| 1 | 3.010 | 181312  | 3.31   | 48049  |
| 2 | 3.160 | 4585115 | 83.74  | 794665 |
| 3 | 3.716 | 175397  | 3.20   | 34646  |
| 4 | 4.112 | 533756  | 9.75   | 91785  |

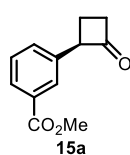

**(-)-methyl (R)-3-(2-oxocyclobutyl)benzoate (15a)**

Prepared according to **general procedure**: 45% yield, 92.1% ee.

$[\alpha]_D^{24} = -24.0$  (c = 1.0, CHCl<sub>3</sub>)

The ee value was determined by the chiral UPC<sup>2</sup> analysis (CHIRALPAK<sup>®</sup> IG-3, CO<sub>2</sub>/MeOH = 95/05, v = 2.0 mL/min, λ = 210.0 nm), t (major) = 2.542 min, t (minor) =

2.756min.

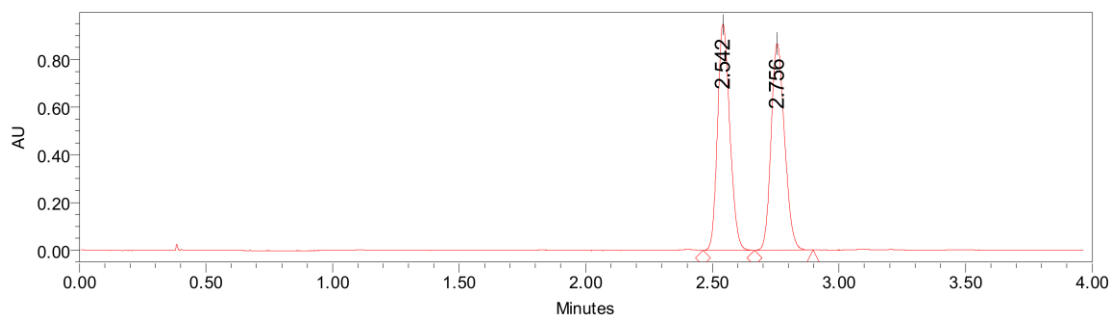

|   | RT    | Area    | % Area | Height |
|---|-------|---------|--------|--------|
| 1 | 2.542 | 3207620 | 49.93  | 949786 |
| 2 | 2.756 | 3216437 | 50.07  | 866855 |

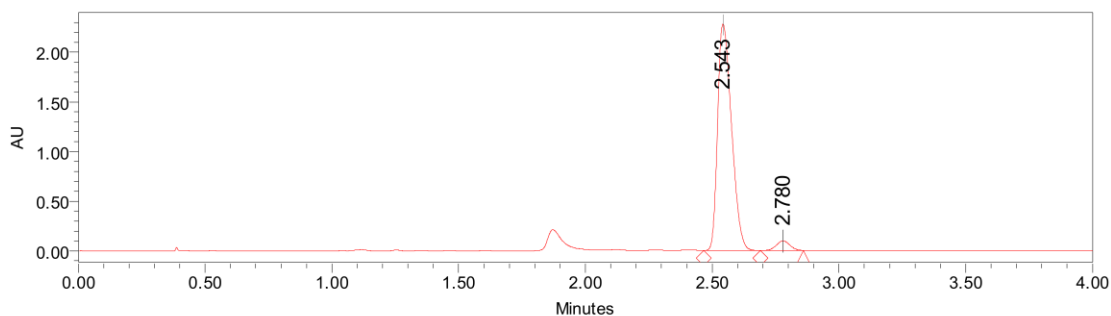

|   | RT    | Area    | % Area | Height  |
|---|-------|---------|--------|---------|
| 1 | 2.543 | 8707633 | 96.04  | 2280884 |
| 2 | 2.780 | 359070  | 3.96   | 96670   |

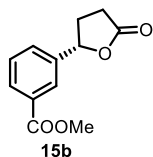

**(-)-methyl (*S*)-3-(5-oxotetrahydrofuran-2-yl)benzoate (**15b**)**

Prepared according to **general procedure**: 53.1% yield, 90.5% ee, **15b/15c** = 6.1/1, colorless liquid.

$[\alpha]_D^{24} = -18.0$  ( $c = 1.0$ ,  $\text{CHCl}_3$ )

$^1\text{H NMR}$  (600 MHz,  $\text{CDCl}_3$ )  $\delta$  8.04-7.99 (m, 2H), 7.55 (d,  $J = 7.8$  Hz, 1H), 7.48 (t,  $J = 7.8$  Hz, 1H), 5.56 (dd,  $J = 8.1, 6.3$  Hz, 1H), 3.93 (s, 3H), 2.76-2.66 (m, 3H), 2.25-2.14 (m, 1H).

$^{13}\text{C NMR}$  (150 MHz,  $\text{CDCl}_3$ )  $\delta$  176.5, 166.5, 139.8, 130.7, 129.7, 129.5, 128.9, 126.3, 80.5, 52.2, 30.9, 28.8.

**HRMS** (ESI) calculated for  $\text{C}_{12}\text{H}_{12}\text{NaO}_4$  [ $\text{M}+\text{Na}^+$ ]: 243.0628, found: 243.0628.

**FT-IR** ( $\text{cm}^{-1}$ ): 2953, 1777, 1722, 1291, 1211, 1109, 753, 698.

**MS** (EI)  $m/z$  (%): 56 (100), 165 (92), 115 (74), 133 (70), 161 (60), 105 (52), 189 (30), 220 (25).

The ee value was determined by the chiral UPC<sup>2</sup> analysis (CHIRALPAK<sup>®</sup> IG-3,  $\text{CO}_2/\text{MeOH} = 95/05$ ,  $v = 2.0$  mL/min,  $\lambda = 227.0$  nm),  $t_b$  (major) = 7.834 min,  $t_b$  (minor) = 9.882 min,  $t_c = 8.663$ .



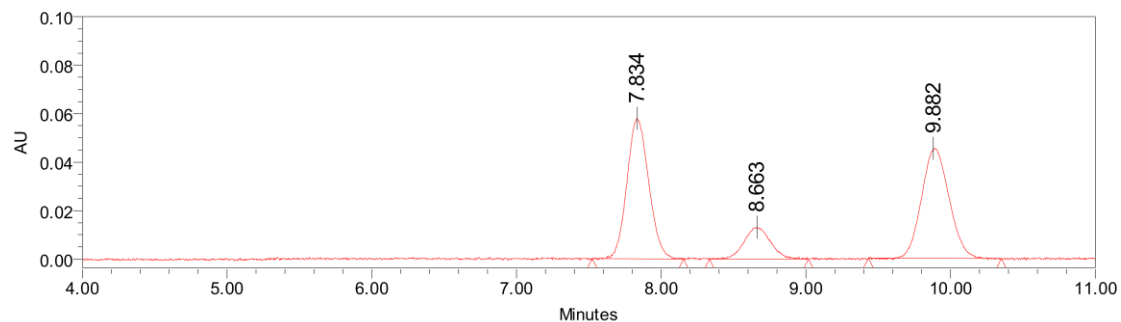

|   | RT    | Area   | % Area | Height |
|---|-------|--------|--------|--------|
| 1 | 7.834 | 606765 | 44.06  | 58052  |
| 2 | 8.663 | 167595 | 12.17  | 13091  |
| 3 | 9.882 | 602905 | 43.78  | 45396  |

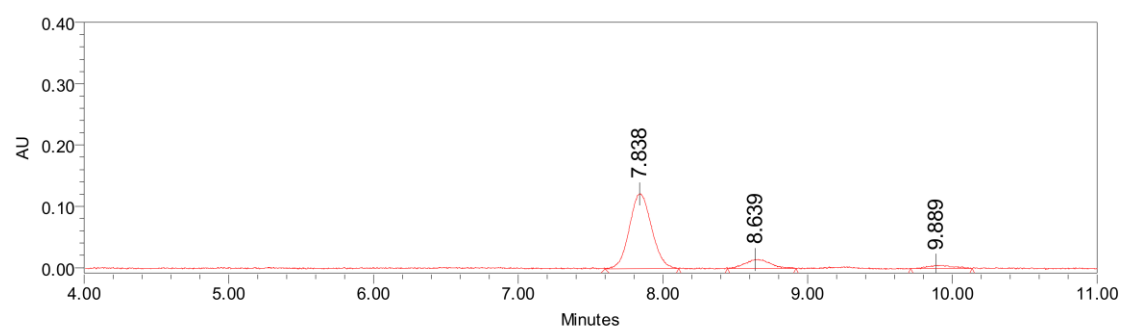

|   | RT    | Area    | % Area | Height |
|---|-------|---------|--------|--------|
| 1 | 7.838 | 1298734 | 84.14  | 121939 |
| 2 | 8.639 | 180369  | 11.69  | 14836  |
| 3 | 9.889 | 64483   | 4.18   | 5414   |

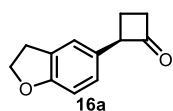

**(-)-2-(2,3-dihydrobenzofuran-5-yl)cyclobutan-1-one (16a)**

Prepared according to **general procedure**: 38 h, 40% yield, 94.7% ee.

$[\alpha]_D^{29} = -5.0$  (c = 1.0, CHCl<sub>3</sub>)

The ee value was determined by the chiral UPC<sup>2</sup> analysis (CHIRALPAK<sup>®</sup> IG-3, CO<sub>2</sub>/MeOH = 95/05, v = 2.0 mL/min,  $\lambda = 202.6$  nm), t (major) = 2.468 min, t (minor) = 2.891 min.

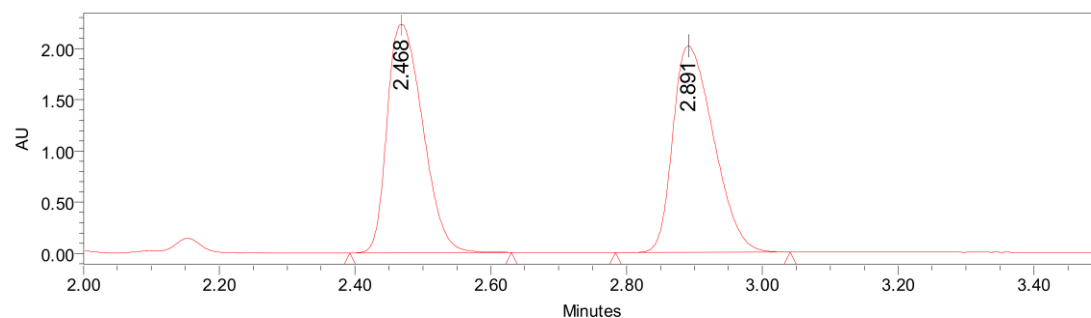

|   | RT    | Area    | % Area | Height  |
|---|-------|---------|--------|---------|
| 1 | 2.468 | 8129225 | 49.15  | 2225875 |
| 2 | 2.891 | 8410340 | 50.85  | 2012880 |

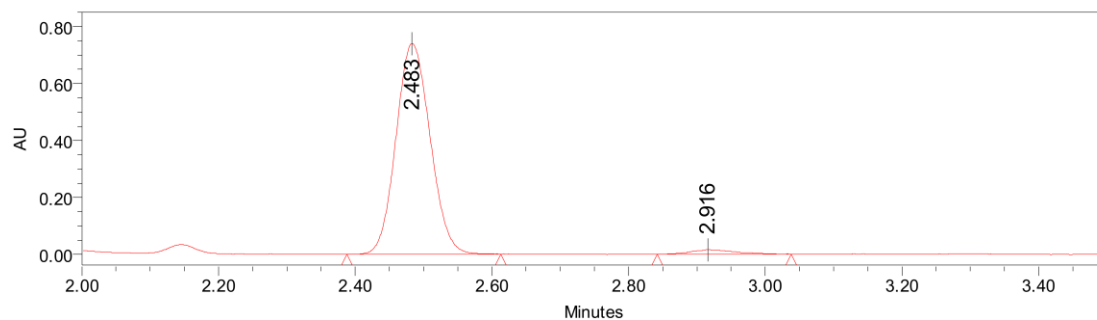

|   | RT    | Area    | % Area | Height |
|---|-------|---------|--------|--------|
| 1 | 2.483 | 2575710 | 97.35  | 739385 |
| 2 | 2.916 | 70071   | 2.65   | 15508  |

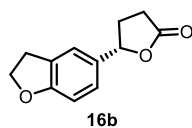

**(S)-5-(2,3-dihydrobenzofuran-5-yl)dihydrofuran-2(3H)-one (16b)**

Prepared according to **general procedure**: 38 h, 56% yield, 86.5% ee, **16b/16c** = 16.7/1, colorless liquid.

$[\alpha]_D^{29} = -9.0$  (c = 1.0, CHCl<sub>3</sub>)

**<sup>1</sup>H NMR** (600 MHz, CDCl<sub>3</sub>) δ 7.19 (s, 1H), 7.06 (dd, *J* = 8.1, 0.9 Hz, 1H), 6.77 (d, *J* = 8.4 Hz, 1H), 5.44 (dd, *J* = 8.4, 6.6 Hz, 1H), 4.59 (t, *J* = 8.7 Hz, 2H), 3.21 (t, *J* = 8.7 Hz, 2H), 2.69-2.63 (m, 2H), 2.63-2.56 (m, 1H), 2.24-2.15 (m, 1H).

**<sup>13</sup>C NMR** (150 MHz, CDCl<sub>3</sub>) δ 176.9, 160.4, 131.1, 127.7, 125.8, 122.4, 109.2, 81.7, 71.5, 31.0, 29.5, 29.3.

**HRMS** (ESI) calculated for C<sub>12</sub>H<sub>12</sub>NaO<sub>3</sub> [M+Na<sup>+</sup>]: 227.0679, found: 227.0673.

**FT-IR** (cm<sup>-1</sup>): 3441, 2921, 1771, 1494, 1178, 1143, 982, 909, 806.

**MS** (EI) *m/z* (%): 84 (100), 86 (66), 51 (64), 69 (50), 149 (44), 204 (40).

The ee value was determined by the chiral UPC2 analysis (CHIRALPAK® IG-3, CO<sub>2</sub>/MeOH = 90/10, *v* = 2.0 mL/min, λ = 202.6 nm), *t*<sub>b</sub> (minor) = 3.921 min, *t*<sub>b</sub> (major) = 4.222 min.

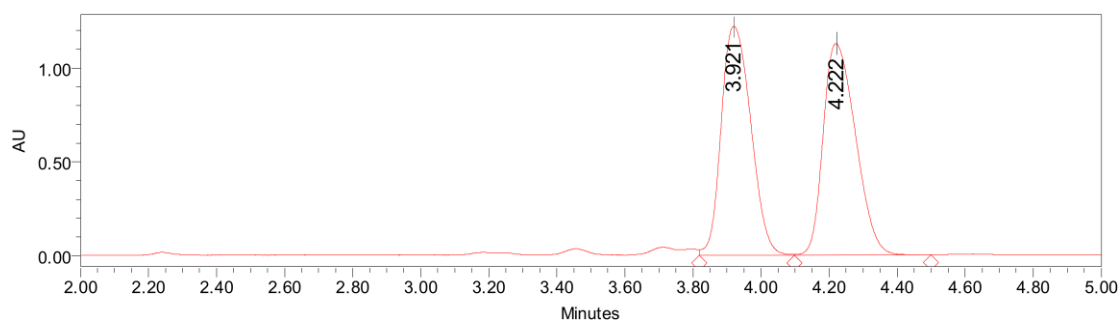

|   | RT    | Area    | % Area | Height  |
|---|-------|---------|--------|---------|
| 1 | 3.921 | 7357680 | 49.70  | 1220034 |
| 2 | 4.222 | 7446361 | 50.30  | 1127800 |

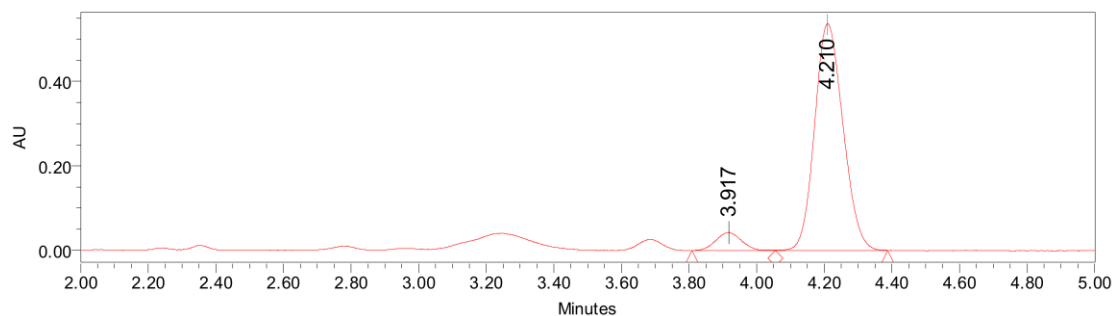

|   | RT    | Area    | % Area | Height |
|---|-------|---------|--------|--------|
| 1 | 3.917 | 226161  | 6.72   | 42840  |
| 2 | 4.210 | 3139486 | 93.28  | 537285 |

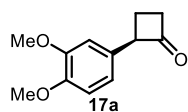

**(-)-2-(3,4-dimethoxyphenyl)cyclobutan-1-one (17a)**

Prepared according to **general procedure**: 39 h, 40% yield, 98.5% ee.

$[\alpha]_D^{30} = -17.0$  (c = 1.0, CHCl<sub>3</sub>)

The ee value was determined by the chiral UPC<sup>2</sup> analysis (CHIRALPAK<sup>®</sup> IC-3, CO<sub>2</sub>/MeOH = 90/10, v = 2.0 mL/min, λ = 205.0 nm), t (major) = 3.615 min, t (minor) = 3.956 min.

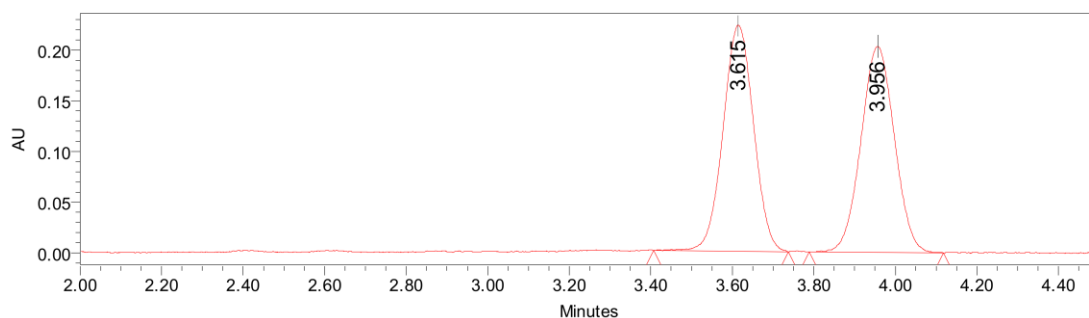

|   | RT    | Area    | % Area | Height |
|---|-------|---------|--------|--------|
| 1 | 3.615 | 1164523 | 50.08  | 223371 |
| 2 | 3.956 | 1160982 | 49.92  | 203478 |

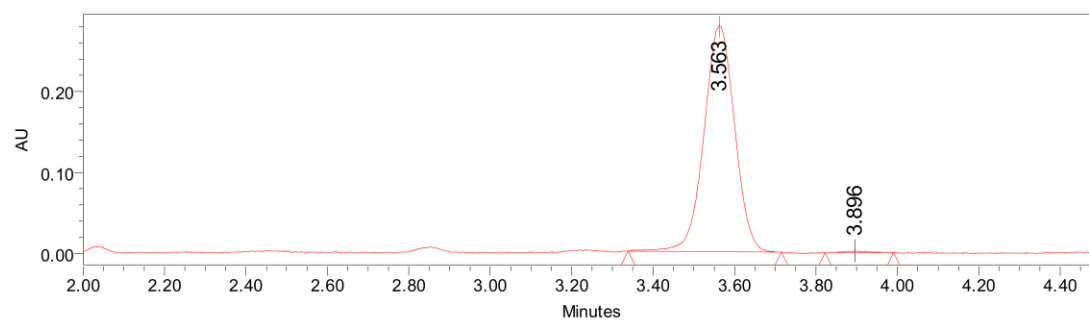

|   | RT    | Area    | % Area | Height |
|---|-------|---------|--------|--------|
| 1 | 3.563 | 1462214 | 99.26  | 279126 |
| 2 | 3.896 | 10971   | 0.74   | 2279   |

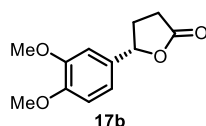

**(-)-5-(3,4-dimethoxyphenyl)dihydrofuran-2(3H)-one (17b)**

Prepared according to **general procedure**: 39 h, 58% yield, 87.0% ee, **17b/17c** = 14.3/1, white solid, m. p.: 114-116 °C.

$[\alpha]_D^{30} = -15.0$  (c = 1.0, CHCl<sub>3</sub>)

<sup>1</sup>H NMR (600 MHz, CDCl<sub>3</sub>) δ 6.87 (s, 2H), 6.86 (s, 1H), 5.46 (dd, *J* = 8.4, 6.0 Hz, 1H), 3.90 (s, 3H), 3.89 (s, 3H), 2.69-2.65 (m, 2H), 2.65-2.60 (m, 1H), 2.25-2.17 (m, 1H).

<sup>13</sup>C NMR (150 MHz, CDCl<sub>3</sub>) δ 176.9, 149.2, 149.1, 131.6, 117.9, 111.0, 108.5, 81.4, 55.9, 30.9, 29.2.

HRMS (ESI) calculated for C<sub>12</sub>H<sub>14</sub>NaO<sub>4</sub> [M+Na<sup>+</sup>]: 245.0784, found: 245.0775.

FT-IR (cm<sup>-1</sup>): 3440, 2937, 2837, 1518, 1464, 1262, 1144, 1025, 910.

MS (EI) *m/z* (%): 222 (100), 139 (55), 167 (50), 163 (35), 147 (34), 107 (30), 178 (23), 191 (14), 195 (5).

The ee value was determined by the chiral UPC<sup>2</sup> analysis (CHIRALPAK<sup>®</sup> IC-3, CO<sub>2</sub>/MeOH = 90/10, *v* = 2.0 mL/min, λ = 205 nm), *t*<sub>b</sub> (minor) = 4.863 min, *t*<sub>b</sub> (major) = 5.582 min, *t*<sub>c</sub> (minor) = 11.517 min, *t*<sub>c</sub> (major) = 11.734 min.

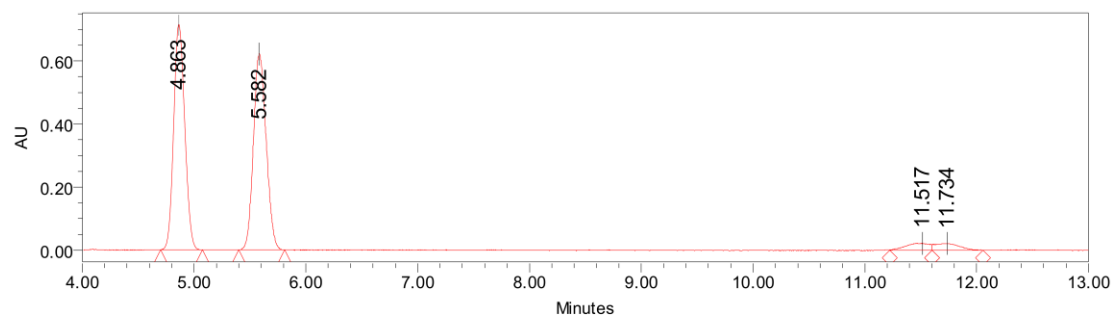

|   | RT     | Area    | % Area | Height |
|---|--------|---------|--------|--------|
| 1 | 4.863  | 4912809 | 46.63  | 715127 |
| 2 | 5.582  | 4955771 | 47.04  | 621529 |
| 3 | 11.517 | 330020  | 3.13   | 22235  |
| 4 | 11.734 | 336508  | 3.19   | 21226  |

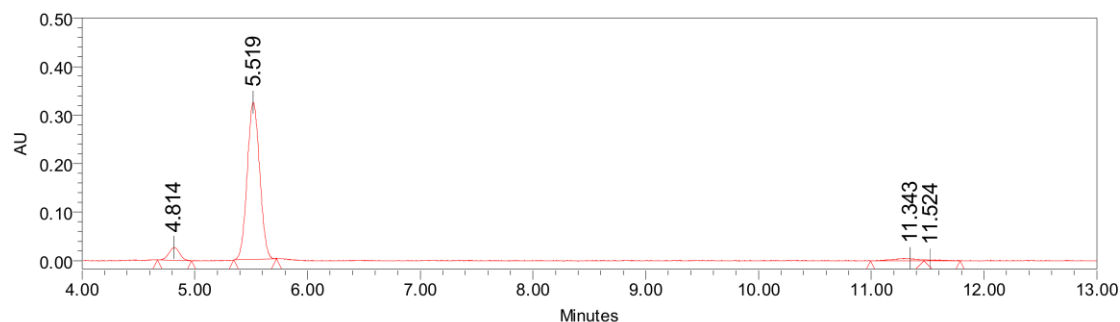

|   | RT     | Area    | % Area | Height |
|---|--------|---------|--------|--------|
| 1 | 4.814  | 172898  | 6.32   | 26487  |
| 2 | 5.519  | 2480728 | 90.73  | 323910 |
| 3 | 11.343 | 66188   | 2.42   | 4594   |
| 4 | 11.524 | 14266   | 0.52   | 1713   |

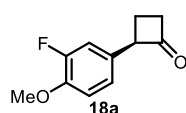

**(-)-2-(3-fluoro-4-methoxyphenyl)cyclobutan-1-one (18a)**

Prepared according to **general procedure**: 38 h, 47% yield, 93.6% ee.

$[\alpha]_D^{27} = -1.0$  (c = 1.0, CHCl<sub>3</sub>)

The ee value was determined by the chiral UPC<sup>2</sup> analysis (CHIRALPAK<sup>®</sup> IG-3, CO<sub>2</sub>/MeOH = 98/02, *v* = 2.0 mL/min, λ = 223.8 nm), *t* (major) = 2.725 min, *t* (minor) = 3.119 min.

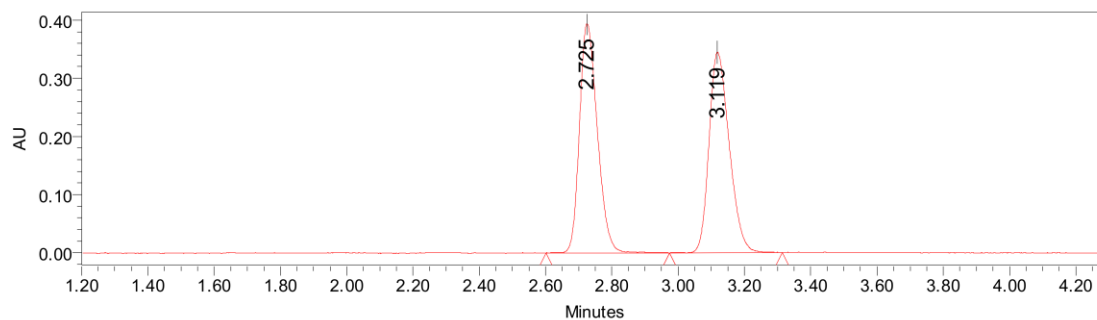

|   | RT    | Area    | % Area | Height |
|---|-------|---------|--------|--------|
| 1 | 2.725 | 1475982 | 50.23  | 394249 |
| 2 | 3.119 | 1462340 | 49.77  | 344869 |

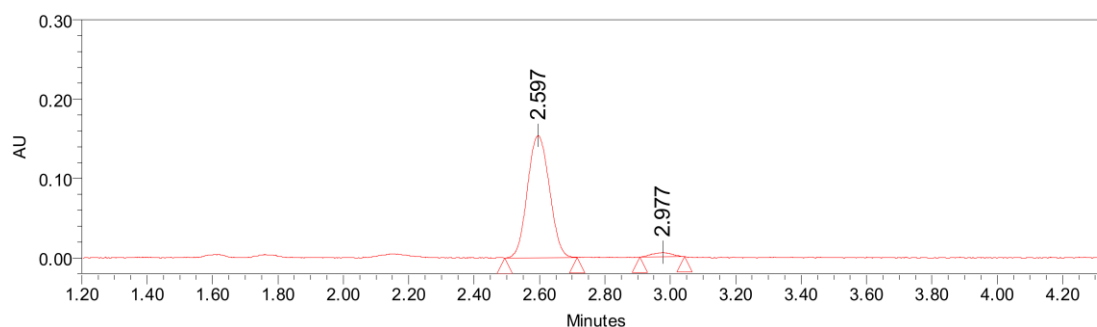

|   | RT    | Area   | % Area | Height |
|---|-------|--------|--------|--------|
| 1 | 2.597 | 719066 | 96.79  | 154085 |
| 2 | 2.977 | 23884  | 3.21   | 5795   |

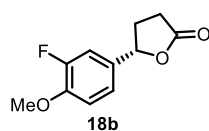

**(-)-5-(3-fluoro-4-methoxyphenyl)dihydrofuran-2(3H)-one (18b)**

Prepared according to **general procedure**: 38 h, 49% yield, 89.4% ee, **18b/18c** = 12.5/1, yellow liquid.

$[\alpha]_D^{27} = -11.0$  ( $c = 1.0$ ,  $\text{CHCl}_3$ )

**$^1\text{H NMR}$**  (400 MHz,  $\text{CDCl}_3$ )  $\delta$  7.12-7.03 (m, 2H), 7.00-6.92 (m, 1H), 5.49-5.39 (m, 1H), 3.90 (s, 3H), 2.71-2.57 (m, 3H), 2.27-2.10 (m, 1H).

**$^{13}\text{C NMR}$**  (100 MHz,  $\text{CDCl}_3$ )  $\delta$  176.6, 152.3 (d,  $J = 245.2$  Hz), 147.7 (d,  $J = 10.6$  Hz), 132.1 (d,  $J = 5.9$  Hz), 121.4 (d,  $J = 3.7$  Hz), 113.4 (d,  $J = 19.2$  Hz), 113.4 (d,  $J = 2.2$  Hz), 80.4, 56.3, 30.8, 28.9.

**$^{19}\text{F NMR}$**  (376 MHz,  $\text{CDCl}_3$ )  $\delta$  -133.96.

**HRMS** (ESI) calculated for  $\text{C}_{11}\text{H}_{11}\text{NaO}_3\text{F}$  [ $\text{M}+\text{Na}^+$ ]: 233.0584, found: 233.0583.

**FT-IR** ( $\text{cm}^{-1}$ ): 2938, 1773, 1522, 1278, 1180, 1142, 1025, 913, 758.

**MS** (EI)  $m/z$  (%): 139 (100), 84 (72), 57 (68), 69 (64), 111 (62), 85 (58), 125 (48), 155 (48), 169 (48), 210 (20).

The ee value was determined by the chiral UPC<sup>2</sup> analysis (CHIRALPAK<sup>®</sup> IG-3,  $\text{CO}_2/\text{MeOH} = 90/10$ ,  $v = 2.0$  mL/min,  $\lambda = 223.8$  nm),  $t_b$  (major) = 2.779 min,  $t_b$  (minor) = 3.081 min,  $t_c$  (major) = 2.542 min,  $t_c$  (minor) = 2.623 min.

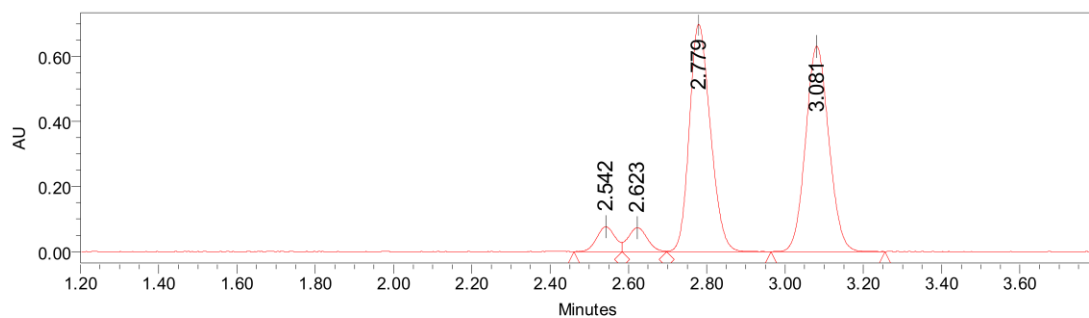

|   | RT    | Area    | % Area | Height |
|---|-------|---------|--------|--------|
| 1 | 2.542 | 249753  | 4.38   | 76495  |
| 2 | 2.623 | 250094  | 4.38   | 73394  |
| 3 | 2.779 | 2603742 | 45.62  | 698461 |
| 4 | 3.081 | 2603692 | 45.62  | 630557 |

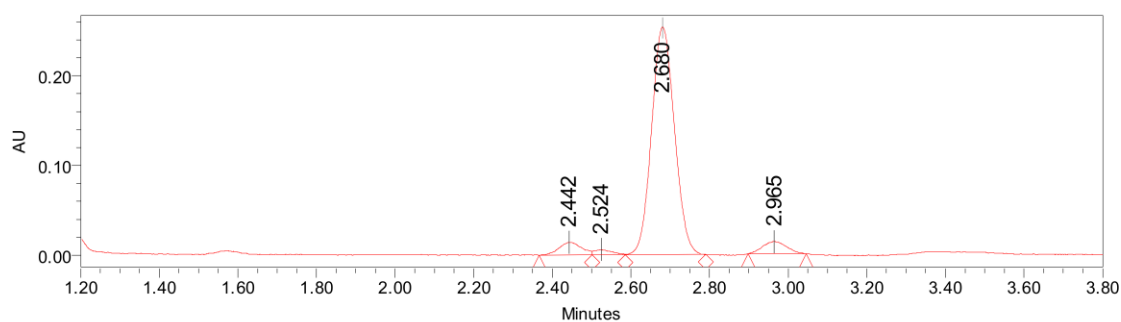

|   | RT    | Area    | % Area | Height |
|---|-------|---------|--------|--------|
| 1 | 2.442 | 57228   | 4.95   | 14249  |
| 2 | 2.524 | 18134   | 1.57   | 5882   |
| 3 | 2.680 | 1023721 | 88.51  | 253473 |
| 4 | 2.965 | 57505   | 4.97   | 13607  |

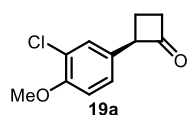

**(-)-2-(3-chloro-4-methoxyphenyl)cyclobutan-1-one (19a)**

Prepared according to **general procedure**: 38 h, 46% yield, 96.6% ee.

$[\alpha]_D^{28} = -33.0$  (c = 1.0, CHCl<sub>3</sub>)

The ee value was determined by the chiral UPC<sup>2</sup> analysis (CHIRALPAK<sup>®</sup> IC-3, CO<sub>2</sub>/MeOH = 95/05, v = 2.0 mL/min, λ = 205.0 nm), t (major) = 2.073 min, t (minor) = 2.271 min.

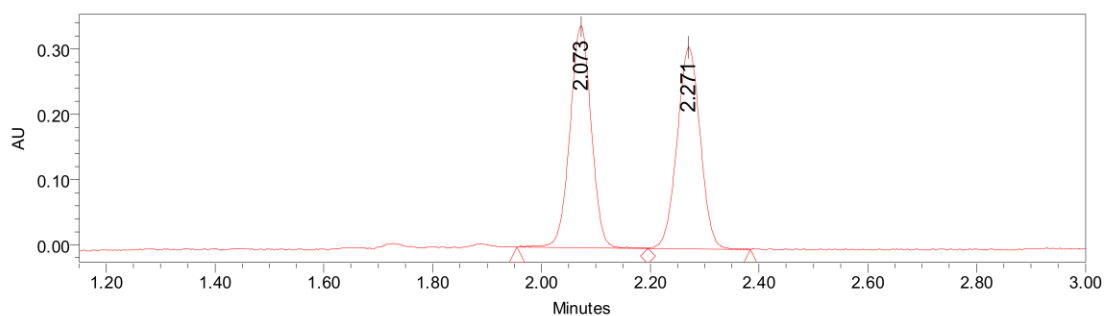

|   | RT    | Area   | % Area | Height |
|---|-------|--------|--------|--------|
| 1 | 2.073 | 923974 | 50.43  | 340005 |
| 2 | 2.271 | 908369 | 49.57  | 308876 |

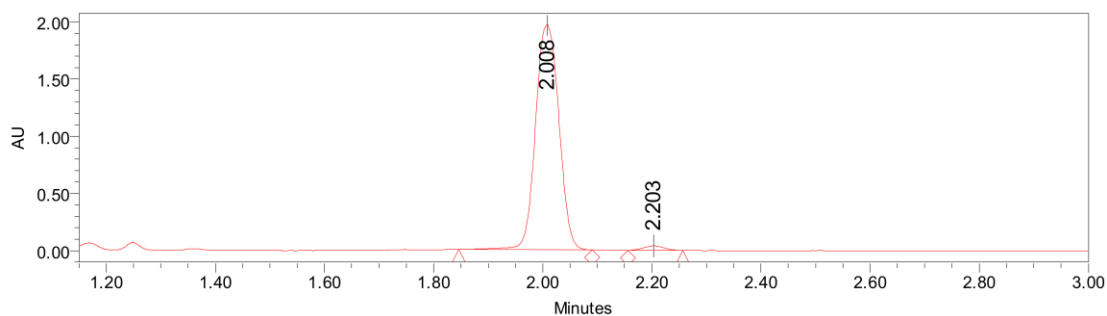

|   | RT    | Area    | % Area | Height  |
|---|-------|---------|--------|---------|
| 1 | 2.008 | 5864118 | 98.29  | 1968516 |
| 2 | 2.203 | 102140  | 1.71   | 38535   |

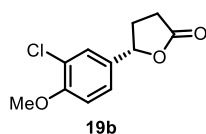

**(-)-5-(3-chloro-4-methoxyphenyl)dihydrofuran-2(3H)-one (19b)**

Prepared according to **general procedure**: 38 h, 52% yield, 89.8% ee, **19b/19c** = 11.1/1, white solid, m. p.: 57-59 °C.

$[\alpha]_D^{28} = -28.0$  (c = 1.0, CHCl<sub>3</sub>)

**<sup>1</sup>H NMR** (400 MHz, CDCl<sub>3</sub>) δ 7.35 (d, *J* = 2.0 Hz, 1H), 7.21 (dd, *J* = 8.6, 2.2 Hz, 1H), 6.94 (d, *J* = 8.4 Hz, 1H), 5.47-5.37 (m, 1H), 3.91 (s, 3H), 2.75-2.56 (m, 3H), 2.25-2.10 (m, 1H).

**<sup>13</sup>C NMR** (100 MHz, CDCl<sub>3</sub>) δ 176.5, 155.0, 132.2, 127.4, 125.0, 122.7, 112.0, 80.3, 56.2, 30.8, 28.9.

**HRMS** (ESI) calculated for C<sub>11</sub>H<sub>12</sub>O<sub>3</sub>Cl [M+H<sup>+</sup>]: 227.0469, found: 227.0469.

**FT-IR** (cm<sup>-1</sup>): 2950, 1776, 1506, 1261, 1179, 1064, 1022.

**MS** (EI) *m/z* (%): 171 (100), 226 (60), 169 (58), 147 (46), 103 (40), 182 (30), 191 (18), 228 (18).

The ee value was determined by the chiral UPC<sup>2</sup> analysis (CHIRALPAK<sup>®</sup> IC-3, CO<sub>2</sub>/MeOH = 95/05, v = 2.0 mL/min, λ = 205.0 nm), t<sub>b</sub> (minor) = 6.266 min, t<sub>b</sub> (major) = 6.643 min, t<sub>c</sub> (major) = 8.362 min, t<sub>c</sub> (minor) = 8.751 min.

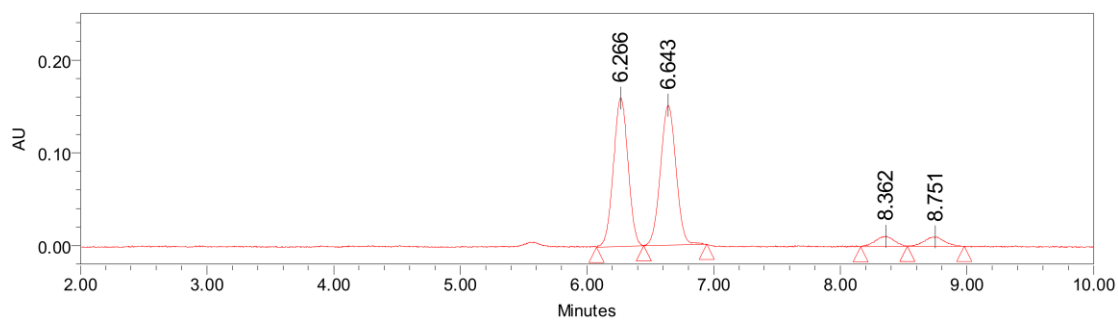

|   | RT    | Area    | % Area | Height |
|---|-------|---------|--------|--------|
| 1 | 6.266 | 1281415 | 45.85  | 160027 |
| 2 | 6.643 | 1285213 | 45.99  | 150898 |
| 3 | 8.362 | 114981  | 4.11   | 11084  |
| 4 | 8.751 | 113001  | 4.04   | 10163  |

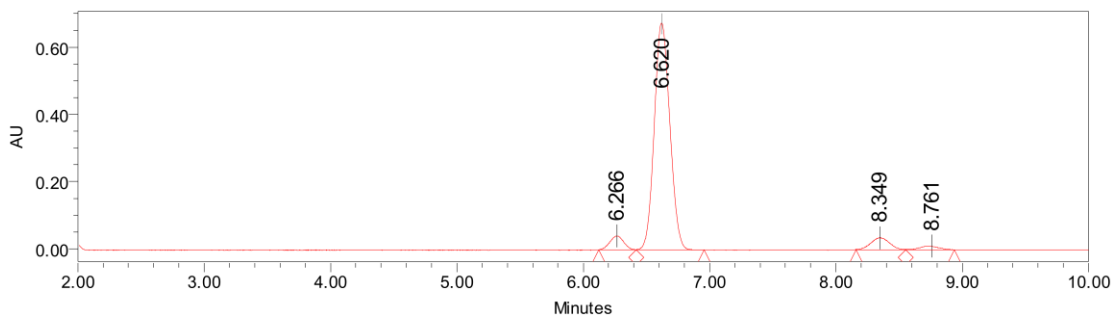

|   | RT    | Area    | % Area | Height |
|---|-------|---------|--------|--------|
| 1 | 6.266 | 312281  | 4.75   | 41050  |
| 2 | 6.620 | 5778956 | 87.97  | 675765 |
| 3 | 8.349 | 363948  | 5.54   | 35503  |
| 4 | 8.761 | 114085  | 1.74   | 10788  |

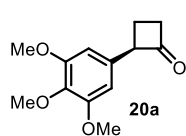

**(-)-2-(3,4,5-trimethoxyphenyl)cyclobutan-1-one (20a)**

Prepared according to **general procedure**: 48 h, 48% yield, 90.5% ee.

$[\alpha]_D^{30} = -7.0$  (c = 1.0, CHCl<sub>3</sub>)

The ee value was determined by the chiral UPC<sup>2</sup> analysis (CHIRALPAK® IC-3, CO<sub>2</sub>/MeOH = 90/10, v = 2.0 mL/min, λ = 205.0 nm), t (major) = 2.560 min, t (minor) = 3.770 min.

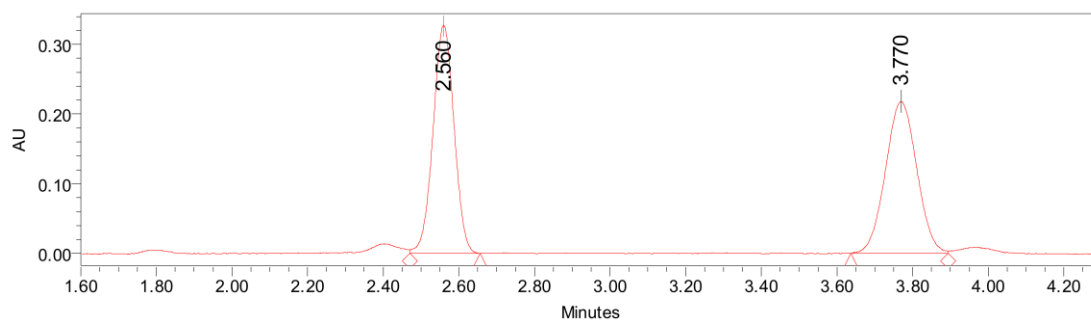

|   | RT    | Area    | % Area | Height |
|---|-------|---------|--------|--------|
| 1 | 2.560 | 1261558 | 50.07  | 327123 |
| 2 | 3.770 | 1257781 | 49.93  | 218327 |

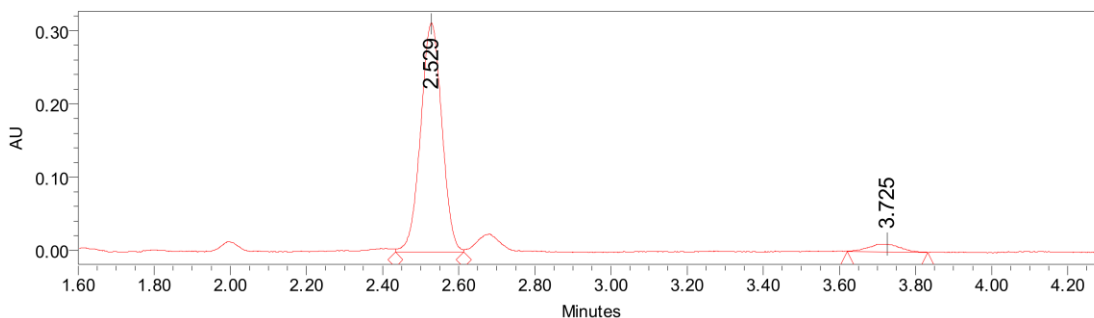

|   | RT    | Area    | % Area | Height |
|---|-------|---------|--------|--------|
| 1 | 2.529 | 1209777 | 95.26  | 312752 |
| 2 | 3.725 | 60210   | 4.74   | 10644  |



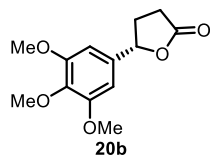

**(-)-5-(3,4,5-trimethoxyphenyl)dihydrofuran-2(3H)-one (20b)**

Prepared according to **general procedure**: 48 h, 48% yield, 84.8% ee, **20b/20c** = >20/1, colorless liquid.

$[\alpha]_D^{30} = -7.0$  ( $c = 1.0$ ,  $\text{CHCl}_3$ )

**$^1\text{H NMR}$**  (600 MHz,  $\text{CDCl}_3$ )  $\delta$  6.54 (s, 2H), 5.45 (dd,  $J = 8.4, 6.0$  Hz, 1H), 3.87 (s, 6H), 3.85 (s, 3H), 2.70-2.62 (m, 3H), 2.24-2.14 (m, 1H).

**$^{13}\text{C NMR}$**  (150 MHz,  $\text{CDCl}_3$ )  $\delta$  176.8, 153.5, 137.9, 135.0, 102.1, 81.2, 60.8, 56.2, 31.1, 29.0.

**HRMS** (ESI) calculated for  $\text{C}_{13}\text{H}_{16}\text{NaO}_5$  [ $\text{M}+\text{Na}^+$ ]: 275.0890, found: 275.0883.

**FT-IR** ( $\text{cm}^{-1}$ ): 2941, 1773, 1593, 1464, 1240, 1179, 1126.

**MS** (EI)  $m/z$  (%): 252 (100), 193 (36), 177 (20), 169 (18), 237 (15), 154 (10), 138 (10), 125 (10), 105 (10).

The ee value was determined by the chiral UPC<sup>2</sup> analysis (CHIRALPAK<sup>®</sup> IC-3,  $\text{CO}_2/\text{MeOH} = 90/10$ ,  $v = 2.0$  mL/min,  $\lambda = 205$  nm),  $t_b$  (minor) = 4.531 min,  $t_b$  (major) = 5.426 min,  $t_c$  (major) = 6.924 min,  $t_c$  (minor) = 7.688 min.

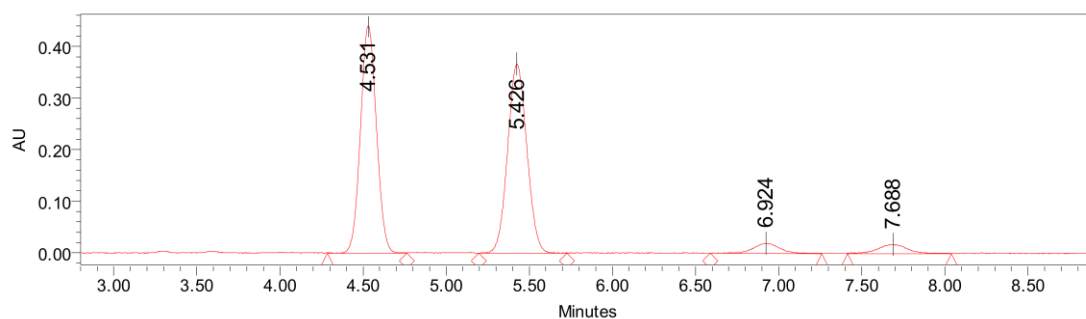

|   | RT    | Area    | % Area | Height |
|---|-------|---------|--------|--------|
| 1 | 4.531 | 2942762 | 46.51  | 440422 |
| 2 | 5.426 | 2948368 | 46.59  | 366656 |
| 3 | 6.924 | 222327  | 3.51   | 19919  |
| 4 | 7.688 | 214325  | 3.39   | 17819  |

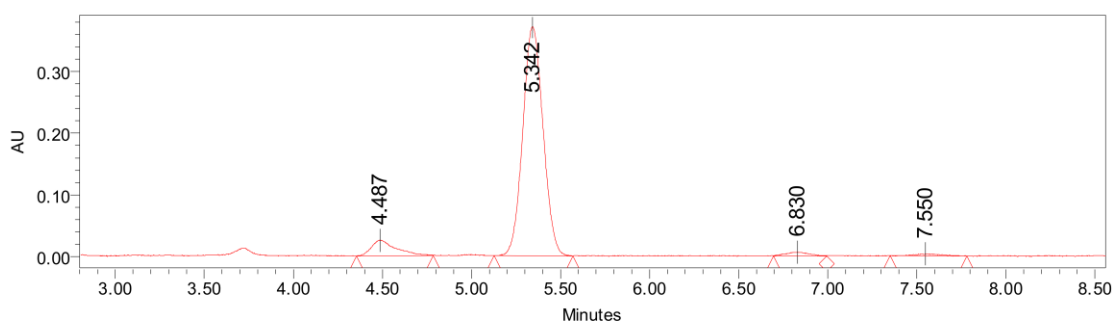

|   | RT    | Area    | % Area | Height |
|---|-------|---------|--------|--------|
| 1 | 4.487 | 242701  | 7.39   | 25396  |
| 2 | 5.342 | 2954978 | 89.98  | 371922 |
| 3 | 6.830 | 54841   | 1.67   | 6329   |
| 4 | 7.550 | 31422   | 0.96   | 3076   |

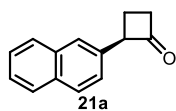

**(-)-2-(naphthalen-2-yl)cyclobutan-1-one (21a)**

Prepared according to **indicated procedure c**: 42 h, 48% yield, 91.0% ee.

$[\alpha]_D^{23} = -12.0$  (c = 1.0, CHCl<sub>3</sub>)

The ee value was determined by the chiral UPC<sup>2</sup> analysis (CHIRALPAK® IG-3, CO<sub>2</sub>/MeOH = 95/05, v = 2.0 mL/min, λ = 220.0 nm), t (major) = 3.180 min, t (minor) = 3.843 min.

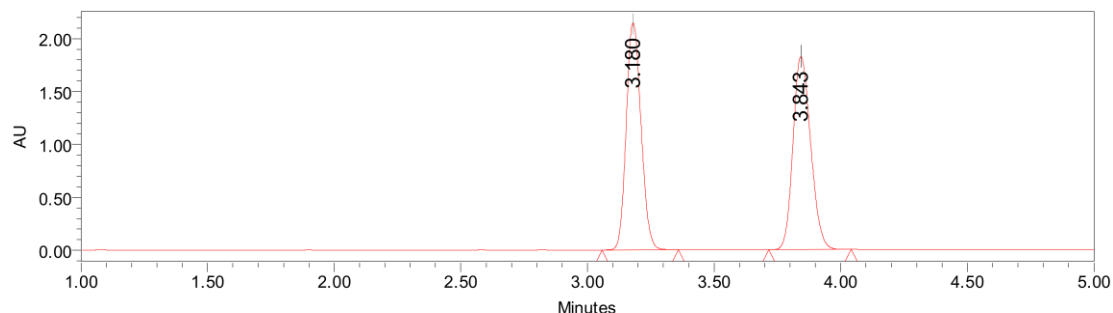

|   | RT    | Area    | % Area | Height  |
|---|-------|---------|--------|---------|
| 1 | 3.180 | 8707652 | 49.56  | 2144050 |
| 2 | 3.843 | 8861954 | 50.44  | 1824480 |

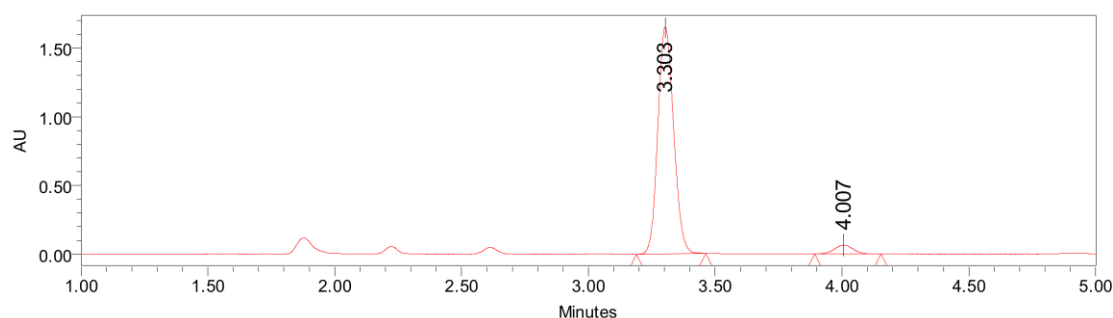

|   | RT    | Area    | % Area | Height  |
|---|-------|---------|--------|---------|
| 1 | 3.303 | 7118425 | 95.52  | 1650716 |
| 2 | 4.007 | 334052  | 4.48   | 63914   |

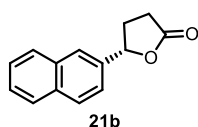

**(S)-5-(naphthalen-2-yl)dihydrofuran-2(3H)-one (21b)**

Prepared according to **indicated procedure c**: 42 h, 51% yield, 91.8% ee, **21b/21c** = >20/1, white solid, m. p.: 115-117 °C.

$[\alpha]_D^{24} = -18.0$  (c = 1.0, CHCl<sub>3</sub>)

<sup>1</sup>H NMR (400 MHz, CDCl<sub>3</sub>) δ 7.93-7.76 (m, 4H), 7.55-7.46 (m, 2H), 7.40 (dd, J = 8.4, 1.6 Hz, 1H), 5.74-5.61 (m, 1H), 2.78-2.63 (m, 3H), 2.35-2.18 (m, 1H).

<sup>13</sup>C NMR (100 MHz, CDCl<sub>3</sub>) δ 176.9, 136.6, 133.1, 133.0, 128.8, 128.0, 127.7, 126.6, 126.4, 124.2, 122.8, 81.2, 30.9, 28.9.

HRMS (ESI) calculated for C<sub>14</sub>H<sub>12</sub>NaO<sub>2</sub> [M+Na<sup>+</sup>]: 235.0730, found: 235.0722.

FT-IR (cm<sup>-1</sup>): 3420, 2951, 1768, 1191, 1013, 933, 755, 491.

MS (EI) m/z (%): 212 (100), 128 (65), 157 (54), 167 (30), 141 (12), 115 (12), 183 (5).

The ee value was determined by the chiral UPC<sup>2</sup> analysis (CHIRALPAK® OD-3, CO<sub>2</sub>/MeOH = 95/05, v = 2.0 mL/min, λ = 220 nm), t<sub>b</sub> (minor) = 3.502 min, t<sub>b</sub> (major) = 3.813 min, t<sub>c</sub> (major) = 4.799 min, t<sub>c</sub> (minor) = 5.501 min.

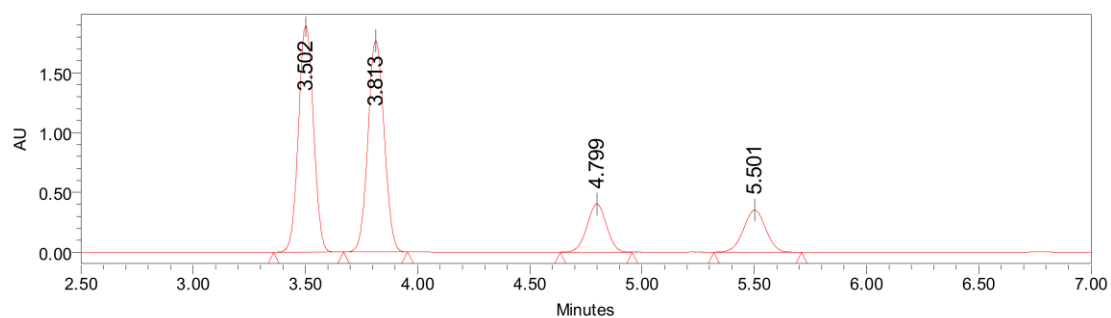

|   | RT    | Area    | % Area | Height  |
|---|-------|---------|--------|---------|
| 1 | 3.502 | 8804609 | 39.07  | 1890894 |
| 2 | 3.813 | 8875516 | 39.38  | 1764657 |
| 3 | 4.799 | 2421633 | 10.74  | 402007  |
| 4 | 5.501 | 2436155 | 10.81  | 352052  |

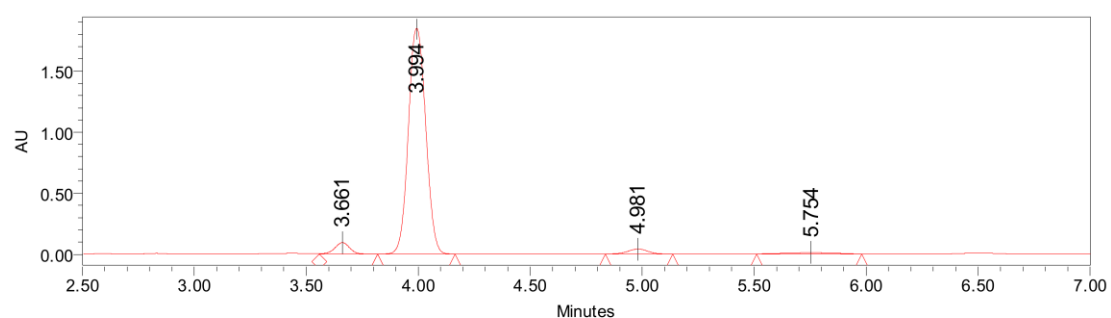

|   | RT    | Area    | % Area | Height  |
|---|-------|---------|--------|---------|
| 1 | 3.661 | 423080  | 3.92   | 92584   |
| 2 | 3.994 | 9950222 | 92.28  | 1846356 |
| 3 | 4.981 | 250129  | 2.32   | 40678   |
| 4 | 5.754 | 159719  | 1.48   | 12366   |

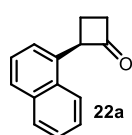

**(+)-2-(naphthalen-1-yl)cyclobutan-1-one (22a)**

Prepared according to **general procedure**: 38 h, 41% yield, 97.8% ee.

$[\alpha]_D^{25} = +48.0$  ( $c = 1.0$ ,  $\text{CHCl}_3$ )

The ee value was determined by the chiral UPC<sup>2</sup> analysis (CHIRALPAK<sup>®</sup> IG-3,  $\text{CO}_2/\text{MeOH} = 95/05$ ,  $v = 2.0$  mL/min,  $\lambda = 217.0$  nm),  $t$  (major) = 2.586 min,  $t$  (minor) = 2.832 min.

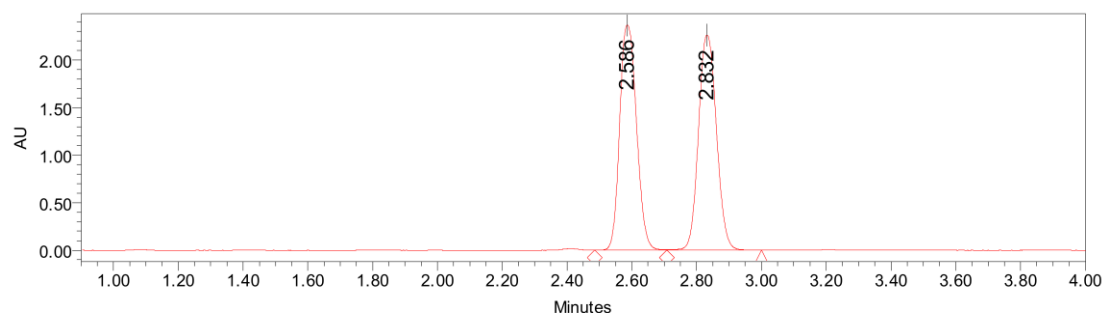

|   | RT    | Area    | % Area | Height  |
|---|-------|---------|--------|---------|
| 1 | 2.586 | 8510333 | 49.46  | 2367128 |
| 2 | 2.832 | 8697014 | 50.54  | 2260464 |

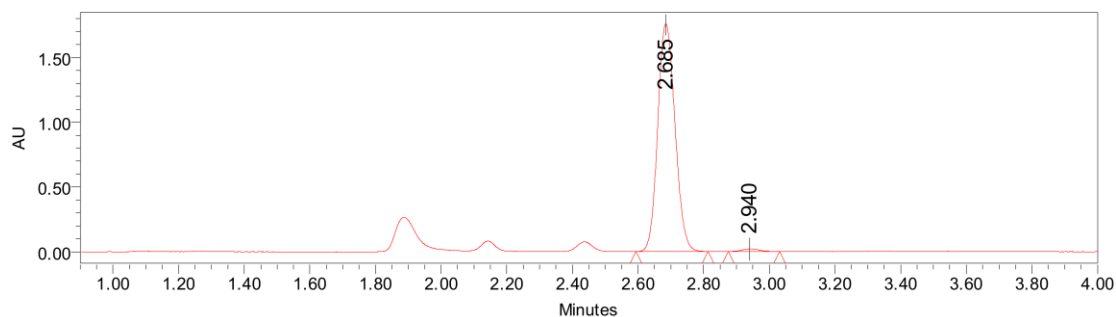

|   | RT    | Area    | % Area | Height  |
|---|-------|---------|--------|---------|
| 1 | 2.685 | 6424718 | 98.89  | 1757725 |
| 2 | 2.940 | 71966   | 1.11   | 19249   |

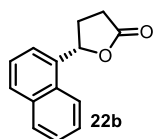

**(-)-5-(naphthalen-1-yl)dihydrofuran-2(3H)-one (22b)**

Prepared according to **general procedure**: 38 h, 56% yield, 94.4% ee (c: 95.3% ee), **22b/22c** = 6.0/1, orange liquid.

$[\alpha]_D^{26} = -110.0$  (c = 1.0, CHCl<sub>3</sub>)

<sup>1</sup>H NMR (400 MHz, CDCl<sub>3</sub>) δ 7.96-7.88 (m, 1H), 7.87-7.80 (m, 2H), 7.61-7.52 (m, 3H), 7.52-7.44 (m, 1H), 6.26 (t, *J* = 7.0 Hz, 1H), 2.96-2.83 (m, 1H), 2.78-2.58 (m, 2H), 2.35-2.23 (m, 1H).

<sup>13</sup>C NMR (100 MHz, CDCl<sub>3</sub>) δ 177.1, 134.9, 133.7, 129.4, 129.1, 128.7, 126.5, 125.9, 125.3, 122.4, 121.5, 78.6, 29.9, 28.3.

**HRMS** (ESI) calculated for C<sub>14</sub>H<sub>12</sub>NaO<sub>2</sub> [M+Na<sup>+</sup>]: 235.0730, found: 235.0726.

**FT-IR** (cm<sup>-1</sup>): 3426, 2925, 1776, 1511, 1184, 1162, 930, 779.

**MS** (EI) *m/z* (%): 128 (100), 212 (92), 157 (54), 153 (30), 167 (20), 115 (15), 141 (10).

The ee value was determined by the chiral UPC<sup>2</sup> analysis (CHIRALPAK® IC-3, CO<sub>2</sub>/MeOH = 95/05, *v* = 2.0 mL/min, λ = 219 nm), *t*<sub>b</sub> (minor) = 5.536 min, *t*<sub>b</sub> (major) = 7.857 min, *t*<sub>c</sub> (major) = 9.693 min, *t*<sub>c</sub> (minor) = 10.255 min.

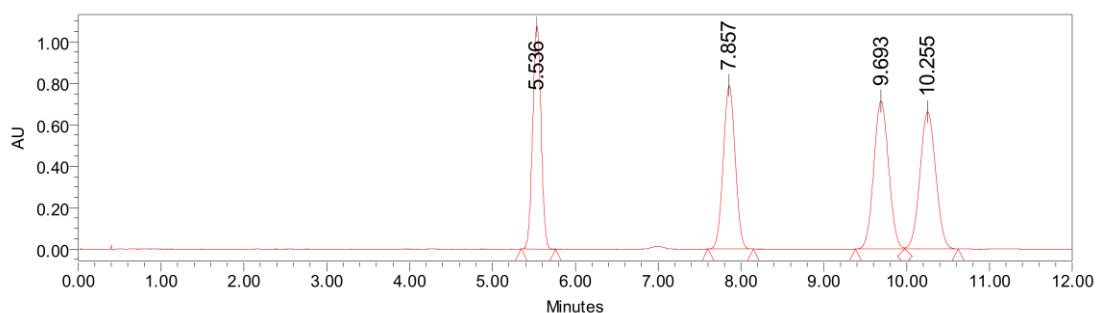

|   | RT     | Area    | % Area | Height  |
|---|--------|---------|--------|---------|
| 1 | 5.536  | 7539214 | 22.82  | 1077212 |
| 2 | 7.857  | 7885523 | 23.87  | 789656  |
| 3 | 9.693  | 8890567 | 26.91  | 714665  |
| 4 | 10.255 | 8723493 | 26.40  | 662116  |

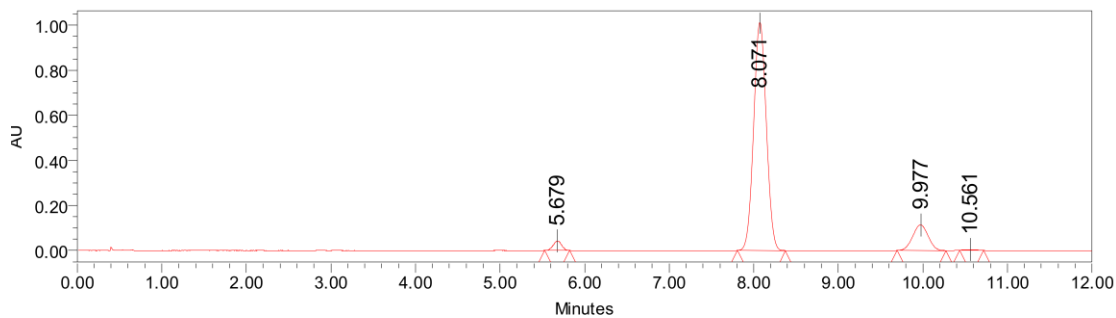

|   | RT     | Area     | % Area | Height  |
|---|--------|----------|--------|---------|
| 1 | 5.679  | 299946   | 2.44   | 42655   |
| 2 | 8.071  | 10498981 | 85.52  | 1012827 |
| 3 | 9.977  | 1442499  | 11.75  | 113721  |
| 4 | 10.561 | 34578    | 0.28   | 3607    |

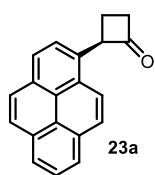

**(-)-2-(pyren-1-yl)cyclobutan-1-one (23a)**

Prepared according to **indicated procedure c**: 42 h, 44% yield, 96.5% ee.

$[\alpha]_D^{30} = -42.0$  (c = 1.0, CHCl<sub>3</sub>)

The ee value was determined by the chiral UPC<sup>2</sup> analysis (CHIRALPAK<sup>®</sup> IC-3, CO<sub>2</sub>/MeOH = 80/20, v = 2.0 mL/min, λ = 240.0 nm), t (major) = 4.539 min, t (minor)

= 6.121 min.

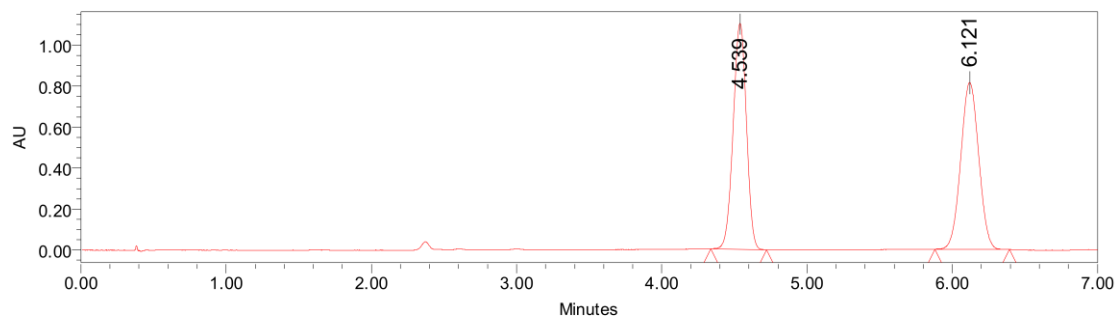

|   | RT    | Area    | % Area | Height  |
|---|-------|---------|--------|---------|
| 1 | 4.539 | 7007808 | 49.99  | 1102414 |
| 2 | 6.121 | 7010802 | 50.01  | 814628  |

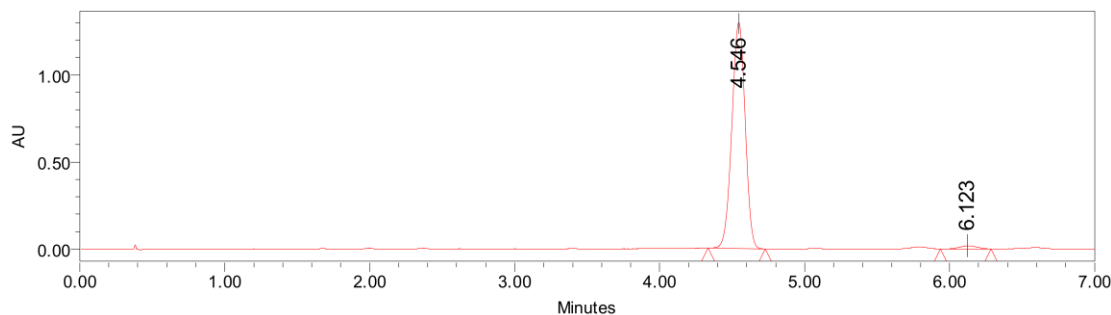

|   | RT    | Area    | % Area | Height  |
|---|-------|---------|--------|---------|
| 1 | 4.546 | 8295588 | 98.28  | 1297292 |
| 2 | 6.123 | 144843  | 1.72   | 17328   |

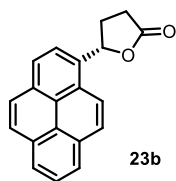

**(-)-5-(pyren-2-yl)dihydrofuran-2(3H)-one (23b)**

Prepared according to **indicated procedure c**: 42 h, 55% yield, 88.6% ee, **23b/23c** = >20/1, white solid, m. p.: 142-144 °C.

$[\alpha]_D^{30} = -131.0$  (c = 1.0, CHCl<sub>3</sub>)

**<sup>1</sup>H NMR** (400 MHz, CDCl<sub>3</sub>) δ 8.26-8.12 (m, 4H), 8.12-7.98 (m, 5H), 6.55 (t, *J* = 7.2 Hz, 1H), 3.06-2.92 (m, 1H), 2.86-2.68 (m, 2H), 2.46-2.30 (m, 1H).

**<sup>13</sup>C NMR** (100 MHz, CDCl<sub>3</sub>) δ 177.2, 132.4, 131.3, 131.2, 130.4, 128.3, 127.7, 127.4, 127.0, 126.2, 125.7, 125.4, 125.0, 124.8, 124.6, 121.7, 121.5, 79.0, 30.9, 28.7.

**HRMS** (ESI) calculated for C<sub>20</sub>H<sub>14</sub>NaO<sub>2</sub> [M+Na<sup>+</sup>]: 309.0886, found: 309.0874.

**FT-IR** (cm<sup>-1</sup>): 3042, 2953, 1774, 1182, 1160, 844, 717.

**MS** (EI) *m/z* (%): 286 (100), 202 (64), 241 (48), 227 (30), 120 (25), 100 (25), 214 (14), 254 (5).

The ee value was determined by the chiral UPC<sup>2</sup> analysis (CHIRALPAK<sup>®</sup> IC-3, CO<sub>2</sub>/MeOH = 80/20, v = 2.0 mL/min, λ = 240.0 nm), t<sub>b</sub> (minor) = 6.940 min, t<sub>b</sub> (major) = 9.071 min, t<sub>c</sub> = 5.571 min, t<sub>c</sub> = 9.071 min.

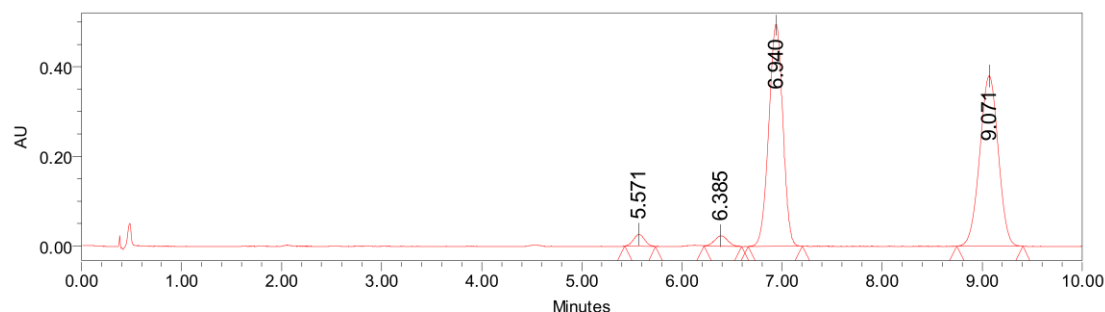

|   | RT    | Area    | % Area | Height |
|---|-------|---------|--------|--------|
| 1 | 5.571 | 205391  | 2.03   | 26390  |
| 2 | 6.385 | 207272  | 2.05   | 23091  |
| 3 | 6.940 | 4848549 | 47.87  | 496089 |
| 4 | 9.071 | 4868298 | 48.06  | 380744 |

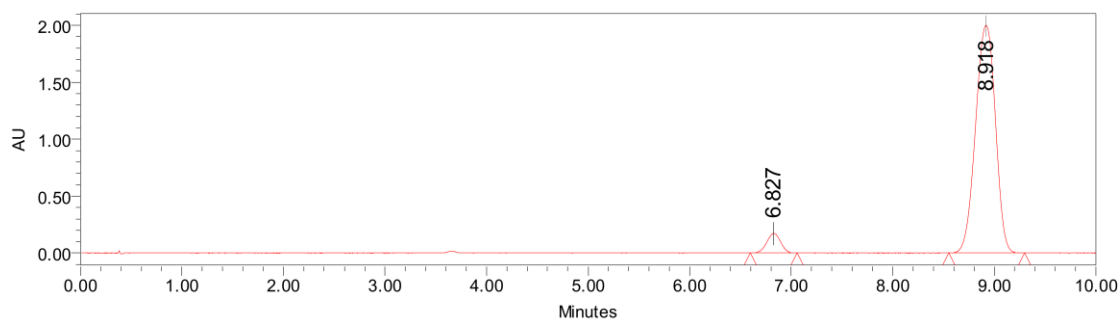

|   | RT    | Area     | % Area | Height  |
|---|-------|----------|--------|---------|
| 1 | 6.827 | 1640006  | 5.69   | 172203  |
| 2 | 8.918 | 27177013 | 94.31  | 2002102 |

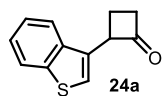

**(+)-2-(benzo[b]thiophen-3-yl)cyclobutan-1-one (24a)**

Prepared according to **indicated procedure b**: 48 h, 40% yield, 83.7% ee.

$[\alpha]_D^{25} = +37.0$  (c = 1.0, CHCl<sub>3</sub>)

The ee value was determined by the chiral UPC<sup>2</sup> analysis (CHIRALPAK<sup>®</sup> IC-3, CO<sub>2</sub>/MeOH = 95/05, v = 2.0 mL/min, λ = 226.0 nm), t (major) = 2.252 min, t (minor) = 2.570 min.

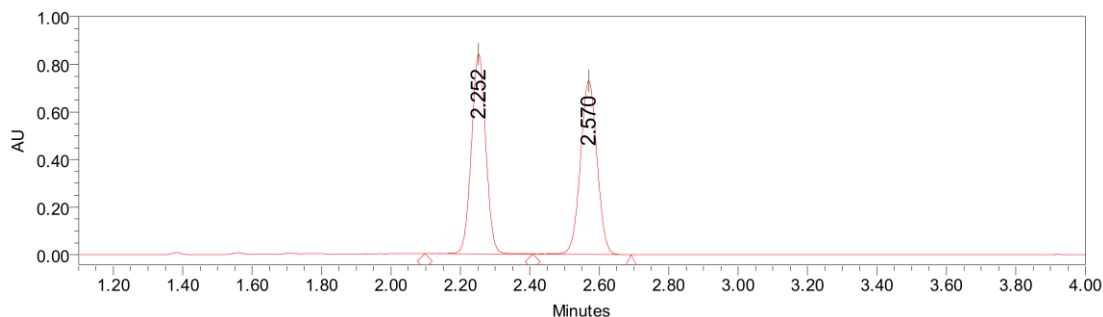

|   | RT    | Area    | % Area | Height |
|---|-------|---------|--------|--------|
| 1 | 2.252 | 2426113 | 50.00  | 839209 |
| 2 | 2.570 | 2426111 | 50.00  | 729770 |

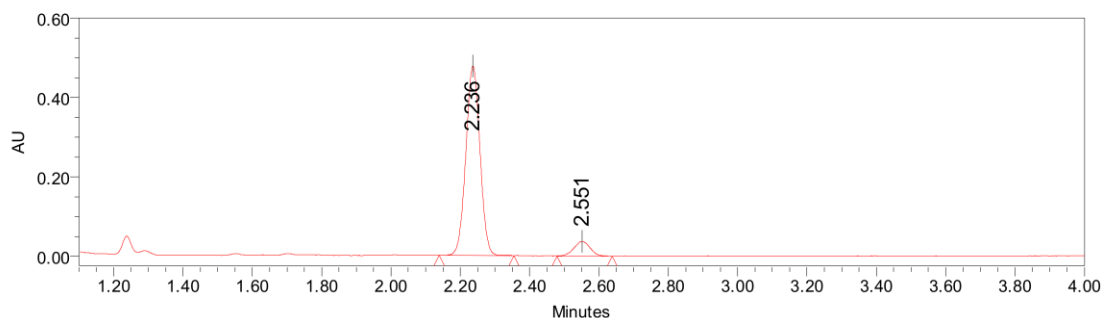

|   | RT    | Area    | % Area | Height |
|---|-------|---------|--------|--------|
| 1 | 2.236 | 1348137 | 91.84  | 477126 |
| 2 | 2.551 | 119789  | 8.16   | 36792  |

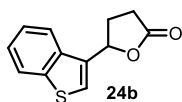

**(-)-5-(benzo[b]thiophen-3-yl)dihydrofuran-2(3H)-one (24b)**

Prepared according to **indicated procedure b**: 48 h, 58% yield, 90.1% ee (**d**: 84.5% ee), **24b/24c** = 4.0/1, orange solid, m. p.: 89-91 °C.

$[\alpha]_D^{25} = -27.0$  (c = 1.0, CHCl<sub>3</sub>)

**<sup>1</sup>H NMR** (600 MHz, CDCl<sub>3</sub>) δ 7.88 (dd, *J* = 6.6, 1.8 Hz, 1H), 7.73 (dd, *J* = 6.9, 2.1 Hz, 1H), 7.33-7.48 (m, 3H), 5.85 (t, *J* = 7.2 Hz, 1H), 2.88-2.62 (m, 3H), 2.46-2.36 (m, 1H).

**<sup>13</sup>C NMR** (150 MHz, CDCl<sub>3</sub>) δ 176.6, 140.9, 136.4, 133.9, 124.8, 124.4, 123.0, 122.8, 121.7, 28.4, 28.3.

**HRMS** (ESI) calculated for C<sub>12</sub>H<sub>10</sub>NaO<sub>2</sub>S [M+Na<sup>+</sup>]: 242.0294, found: 242.0295.

**FT-IR** (cm<sup>-1</sup>) 3081, 2961, 1773, 1704, 1429, 1184, 1020, 919, 747, 733, 421.

**MS** (EI) *m/z* (%): 218 (100), 168 (80), 173 (66), 147 (60), 134 (50), 115 (28).

The ee value was determined by the chiral UPC<sup>2</sup> analysis (CHIRALPAK<sup>®</sup> IC-3, CO<sub>2</sub>/MeOH = 95/05, v = 2.0 mL/min, λ = 226.0 nm), t<sub>b</sub> (minor) = 6.658 min, t<sub>b</sub> (major) = 6.309 min, t<sub>c</sub> (major) = 9.088 min, t<sub>c</sub> (minor) = 10.135 min.

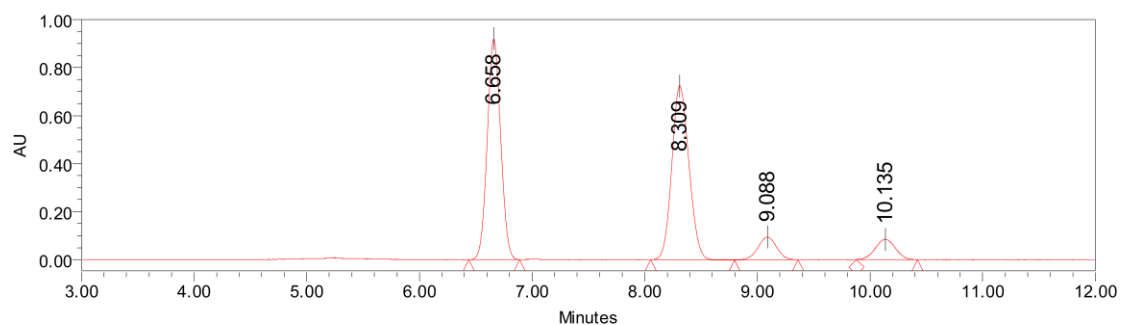

|   | RT     | Area    | % Area | Height |
|---|--------|---------|--------|--------|
| 1 | 6.658  | 7601706 | 43.69  | 920396 |
| 2 | 8.309  | 7636650 | 43.89  | 724852 |
| 3 | 9.088  | 1087447 | 6.25   | 94508  |
| 4 | 10.135 | 1074740 | 6.18   | 85258  |

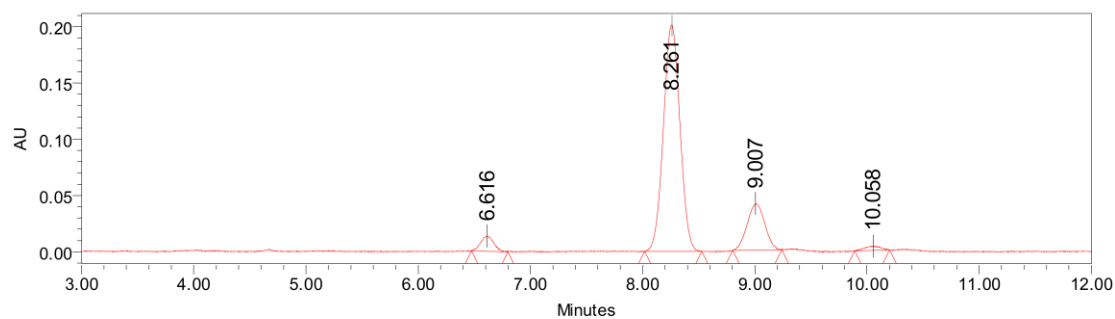

|   | RT     | Area    | % Area | Height |
|---|--------|---------|--------|--------|
| 1 | 6.616  | 107863  | 4.06   | 13380  |
| 2 | 8.261  | 2062542 | 77.59  | 201349 |
| 3 | 9.007  | 449850  | 16.92  | 41381  |
| 4 | 10.058 | 37833   | 1.42   | 3909   |

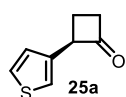

**(-)-2-(thiophen-3-yl)cyclobutan-1-one (25a)**

Prepared according to **indicated procedure b**: 36 h, 45% yield, 90.4% ee.

$[\alpha]_D^{26} = -13.0$  (c = 1.0, CHCl<sub>3</sub>)

The ee value was determined by the chiral UPC<sup>2</sup> analysis (CHIRALPAK<sup>®</sup> IG-3, CO<sub>2</sub>/MeOH = 98/02, v = 2.0 mL/min, λ = 234.0 nm), t (major) = 1.959 min, t (minor) = 2.294 min.

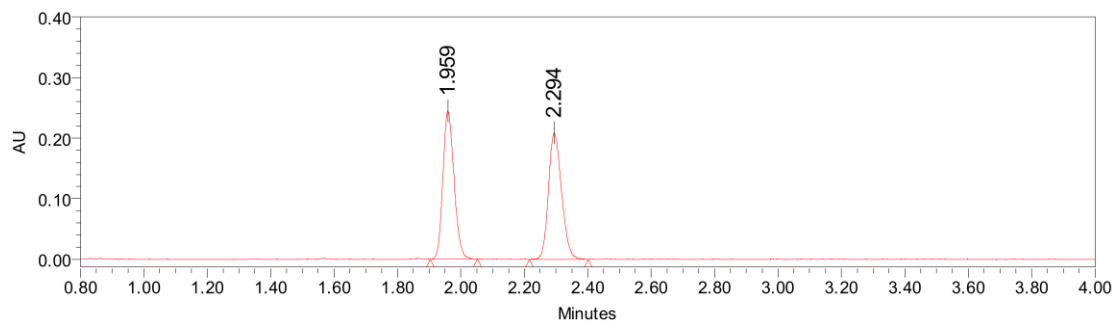

|   | RT    | Area   | % Area | Height |
|---|-------|--------|--------|--------|
| 1 | 1.959 | 596113 | 49.86  | 244547 |
| 2 | 2.294 | 599474 | 50.14  | 208613 |



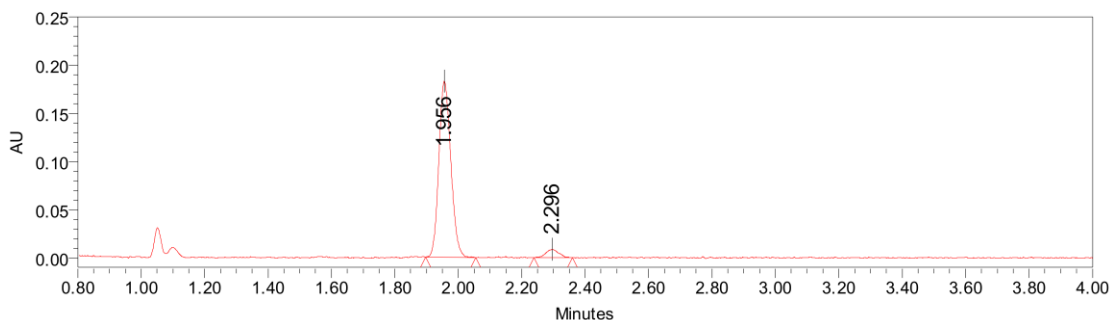

|   | RT    | Area   | % Area | Height |
|---|-------|--------|--------|--------|
| 1 | 1.956 | 479104 | 95.26  | 182669 |
| 2 | 2.296 | 23863  | 4.74   | 8531   |

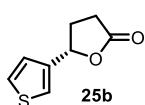

**(+)-5-(thiophen-3-yl)dihydrofuran-2(3H)-one (25b)**

Prepared according to **indicated procedure b**: 36 h, 51% yield, 89.8% ee, **25b/25c** = 17.1/1, orange liquid.

$[\alpha]_D^{26} = +5.0$  (c = 1.0, CHCl<sub>3</sub>)

<sup>1</sup>H NMR (600 MHz, CDCl<sub>3</sub>) δ 7.37 (dd, *J* = 5.4, 3.0 Hz, 1H), 7.28 (d, *J* = 3.0 Hz, 1H), 7.07 (dd, *J* = 5.1, 1.5 Hz, 1H), 5.59 (t, *J* = 6.6 Hz, 1H), 2.71-2.59 (m, 3H), 2.32-2.21 (m, 1H).

<sup>13</sup>C NMR (150 MHz, CDCl<sub>3</sub>) δ 176.7, 140.3, 127.0, 125.1, 121.9, 78.0, 29.9, 28.7.

HRMS (ESI) calculated for C<sub>8</sub>H<sub>8</sub>NaO<sub>2</sub>S [M+Na<sup>+</sup>]: 191.0137, found: 191.0138.

FT-IR (cm<sup>-1</sup>) 3101, 2958, 1771, 1709, 1168, 1159, 911, 789, 747, 678.

MS (EI) *m/z* (%): 139 (100), 111 (98), 105 (66), 156 (50), 168 (20).

The ee value was determined by the chiral UPC<sup>2</sup> analysis (CHIRALPAK<sup>®</sup> IG-3, CO<sub>2</sub>/MeOH = 95/05, v = 2.0 mL/min, λ = 226.0 nm), t<sub>b</sub> (major) = 4.560 min, t<sub>b</sub> (minor) = 4.882 min.

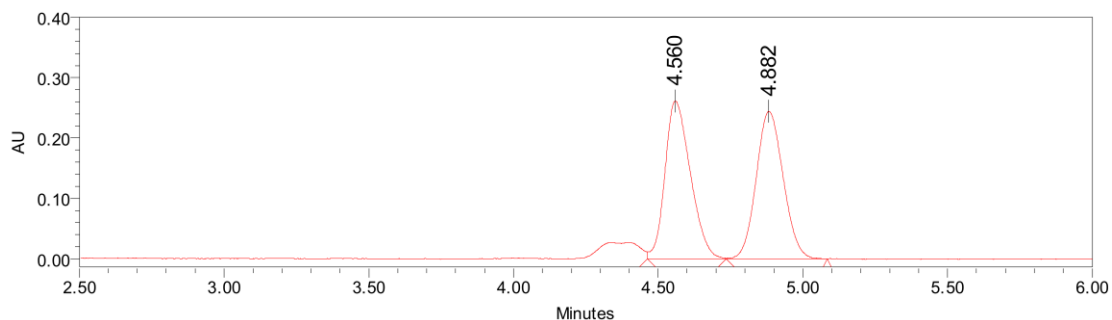

|   | RT    | Area    | % Area | Height |
|---|-------|---------|--------|--------|
| 1 | 4.560 | 1594903 | 50.05  | 261583 |
| 2 | 4.882 | 1591683 | 49.95  | 244763 |

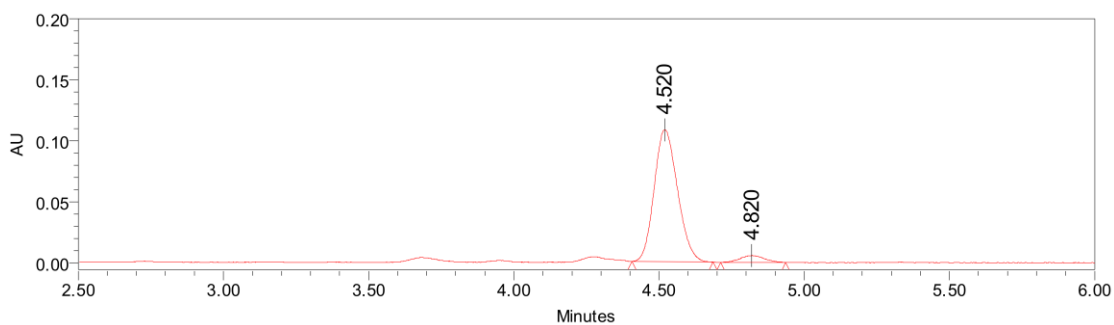

|   | RT    | Area   | % Area | Height |
|---|-------|--------|--------|--------|
| 1 | 4.520 | 604638 | 94.91  | 108150 |
| 2 | 4.820 | 32417  | 5.09   | 5657   |

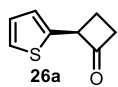

**(-)-2-(thiophen-2-yl)cyclobutan-1-one (26a)**

Prepared according to **general procedure**: 48 h, 40% yield, 98.5% ee.

$[\alpha]_D^{26} = -15.0$  ( $c = 1.0$ ,  $\text{CHCl}_3$ )

The ee value was determined by the chiral UPC<sup>2</sup> analysis (CHIRALPAK<sup>®</sup> IG-3,  $\text{CO}_2/\text{MeOH} = 98/02$ ,  $v = 2.0$  mL/min,  $\lambda = 235.6$  nm),  $t$  (major) = 1.766 min,  $t$  (minor) = 1.884 min.

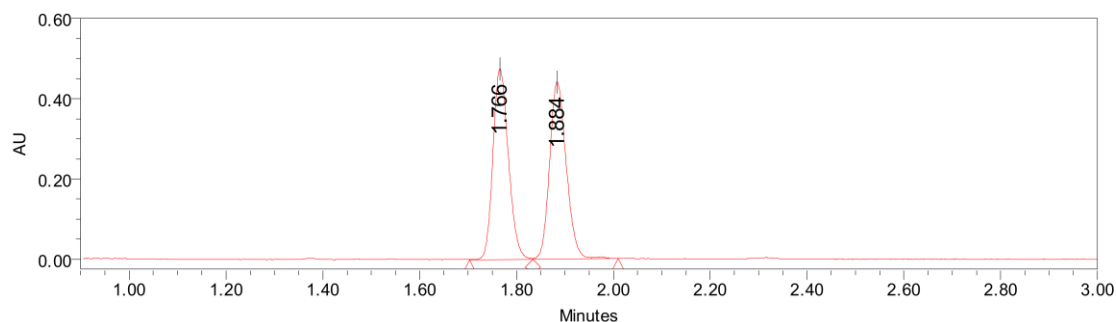

|   | RT    | Area    | % Area | Height |
|---|-------|---------|--------|--------|
| 1 | 1.766 | 1047346 | 49.84  | 474513 |
| 2 | 1.884 | 1053899 | 50.16  | 441150 |

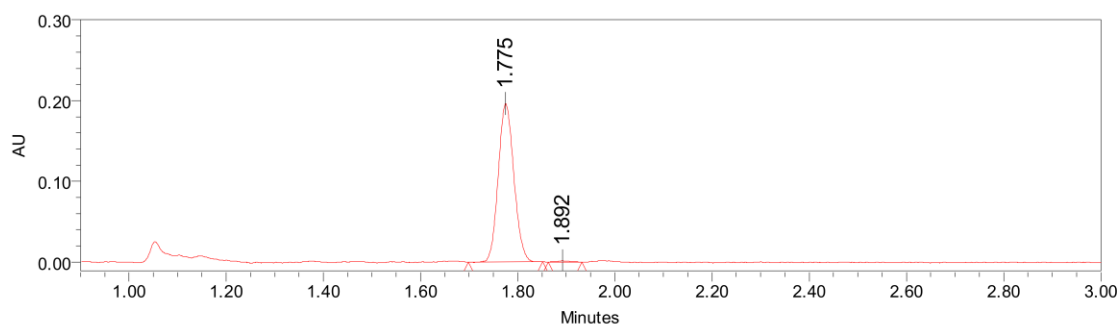

|   | RT    | Area   | % Area | Height |
|---|-------|--------|--------|--------|
| 1 | 1.775 | 437402 | 99.27  | 196029 |
| 2 | 1.892 | 3237   | 0.73   | 1645   |

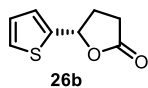

**(+)-5-(furan-2-yl)dihydrofuran-2(3H)-one (26b)**

Prepared according to **general procedure**: 48 h, 54% yield, 85.9% ee, **26b/26c** = 12.0/1, yellow liquid.

$[\alpha]_D^{26} = +21.0$  ( $c = 1.0$ ,  $\text{CHCl}_3$ )

<sup>1</sup>H NMR (600 MHz,  $\text{CDCl}_3$ )  $\delta$  7.34 (d,  $J = 5.4$  Hz, 1H), 7.09 (d,  $J = 3.6$  Hz, 1H), 7.01 (dd,  $J = 5.1, 3.9$  Hz, 1H), 5.80-5.70 (m, 1H), 2.75-2.61 (m, 3H), 2.43-2.33 (m, 1H).

<sup>13</sup>C NMR (150 MHz,  $\text{CDCl}_3$ )  $\delta$  176.1, 141.7, 126.9, 126.2, 125.9, 77.3, 30.7, 28.9.

HRMS (ESI) calculated for  $\text{C}_8\text{H}_9\text{O}_2$  [ $\text{M}+\text{H}^+$ ]: 169.0318, found: 169.0320.

FT-IR (cm<sup>-1</sup>) 3907, 2960, 1777, 1706, 1297, 1172, 1014, 920, 718.

MS (EI)  $m/z$  (%): 111 (100), 139 (78), 105 (48), 156 (40), 168 (20).

The ee value was determined by the chiral UPC<sup>2</sup> analysis (CHIRALPAK<sup>®</sup> IC-3,  $\text{CO}_2/\text{MeOH} = 95/05$ ,  $v = 2.0$  mL/min,  $\lambda = 230.0$  nm),  $t_b$  (minor) = 3.023 min,  $t_b$  (major) = 3.269 min.

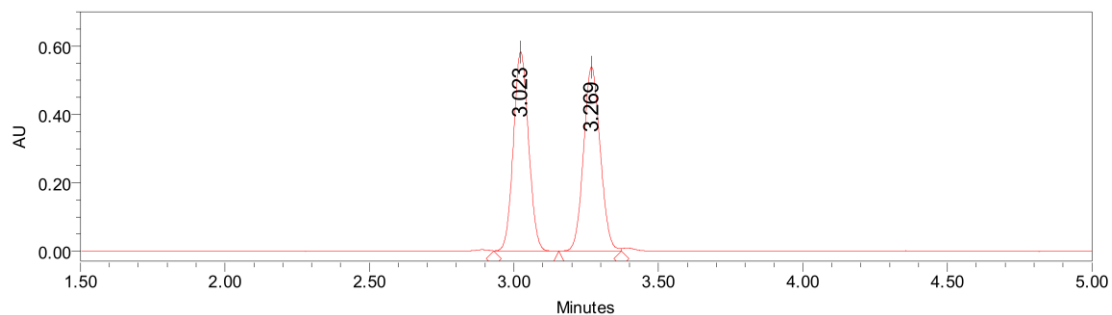

|   | RT    | Area    | % Area | Height |
|---|-------|---------|--------|--------|
| 1 | 3.023 | 2133282 | 49.63  | 583109 |
| 2 | 3.269 | 2164971 | 50.37  | 538949 |

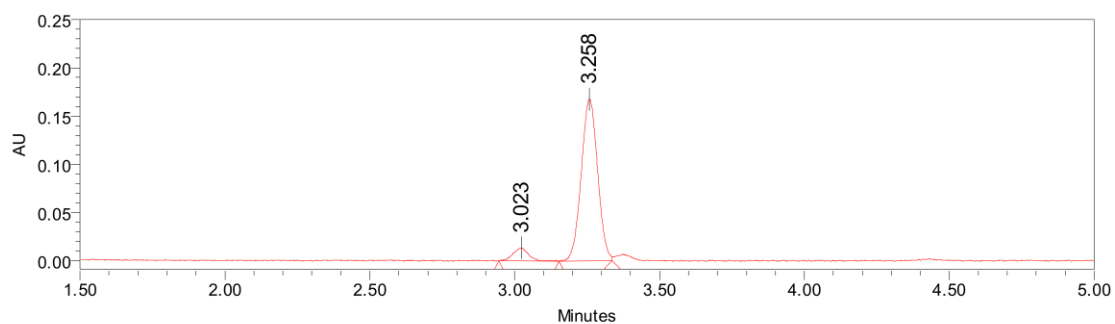

|   | RT    | Area   | % Area | Height |
|---|-------|--------|--------|--------|
| 1 | 3.023 | 50184  | 7.06   | 13563  |
| 2 | 3.258 | 660307 | 92.94  | 167650 |

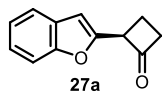

**(+)-2-(benzofuran-2-yl)cyclobutan-1-one (27a)**

Prepared according to **general procedure**: 36 h, 42% yield, 95.7% ee.

$[\alpha]_D^{25} = +2.0$  (c = 1.0, CHCl<sub>3</sub>)

The ee value was determined by the chiral UPC<sup>2</sup> analysis (CHIRALPAK<sup>®</sup> OD-3, CO<sub>2</sub>/MeOH = 98/02, v = 2.0 mL/min, λ = 246.0 nm), t (major) = 1.688 min, t (minor) = 2.011 min.

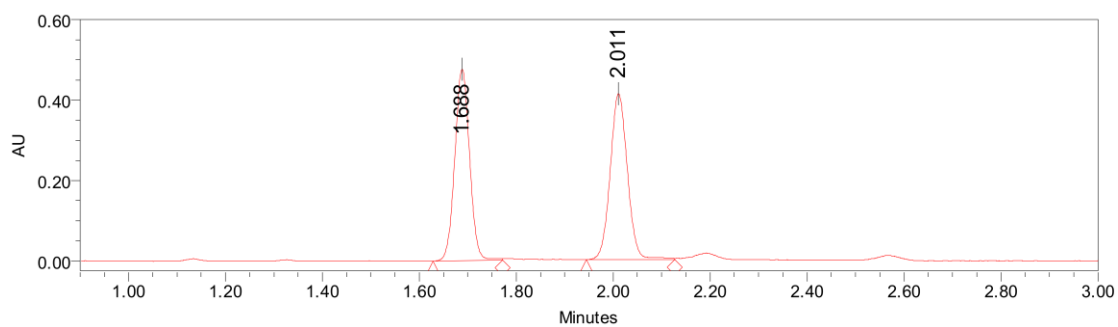

|   | RT    | Area    | % Area | Height |
|---|-------|---------|--------|--------|
| 1 | 1.688 | 1006897 | 49.70  | 476279 |
| 2 | 2.011 | 1018911 | 50.30  | 412773 |

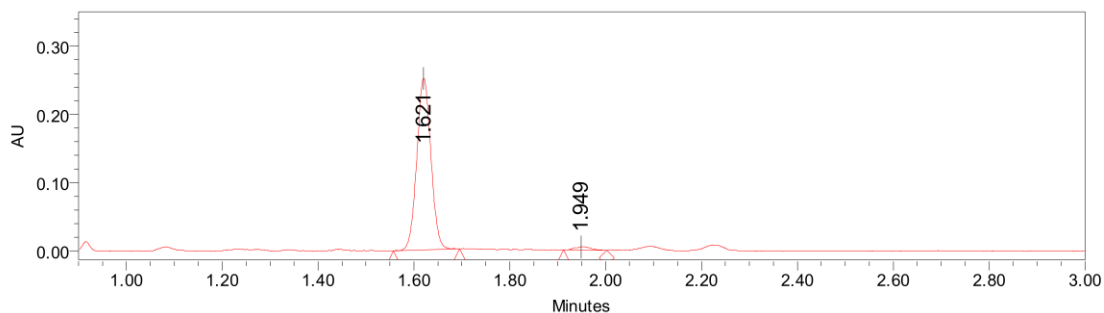

|   | RT    | Area   | % Area | Height |
|---|-------|--------|--------|--------|
| 1 | 1.621 | 513675 | 97.85  | 251449 |
| 2 | 1.949 | 11308  | 2.15   | 4711   |

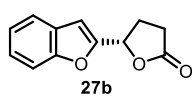

**(+)-5-(benzofuran-2-yl)dihydrofuran-2(3H)-one (27b)**

Prepared according to **general procedure**: 48 h, 53% yield, 81.5% ee, **27b/27c** = 10.0/1, yellow solid, m. p.: 44-46 °C.

$[\alpha]_D^{25} = +2.0$  (c=1.0, CHCl<sub>3</sub>)

**<sup>1</sup>H NMR** (600 MHz, CDCl<sub>3</sub>) δ 7.56 (d, *J* = 7.8 Hz, 1H), 7.46 (d, *J* = 7.8 Hz, 1H), 7.31 (t, *J* = 7.2 Hz, 1H), 7.24 (t, *J* = 7.5 Hz, 1H), 6.77 (s, 1H), 5.62 (t, *J* = 6.6 Hz, 1H), 2.87-2.76 (m, 1H), 2.70-2.52 (m, 3H).

**<sup>13</sup>C NMR** (150 MHz, CDCl<sub>3</sub>) δ 176.3, 155.1, 153.4, 127.4, 125.1, 123.1, 121.4, 111.4, 105.5, 74.6, 28.1, 26.6.

**HRMS** (ESI) calculated for C<sub>12</sub>H<sub>10</sub>NaO<sub>3</sub> [M+Na<sup>+</sup>]: 225.0522, found: 225.0524.

**FT-IR** (cm<sup>-1</sup>) 3435, 2927, 1777, 1701, 1453, 1254, 1174, 1142, 919, 747.

**MS** (EI) *m/z* (%): 147 (100), 145 (60), 157 (58), 131 (36), 210 (34).

The ee value was determined by the chiral UPC<sup>2</sup> analysis (CHIRALPAK<sup>®</sup> OD-3, CO<sub>2</sub>/MeOH = 97/03, *v* = 2.0 mL/min, λ = 243.0 nm), *t<sub>b</sub>* (minor) = 2.706 min, *t<sub>b</sub>* (major) = 3.162 min, *t<sub>c</sub>* (major) = 3.309 min, *t<sub>c</sub>* (minor) = 3.398 min.

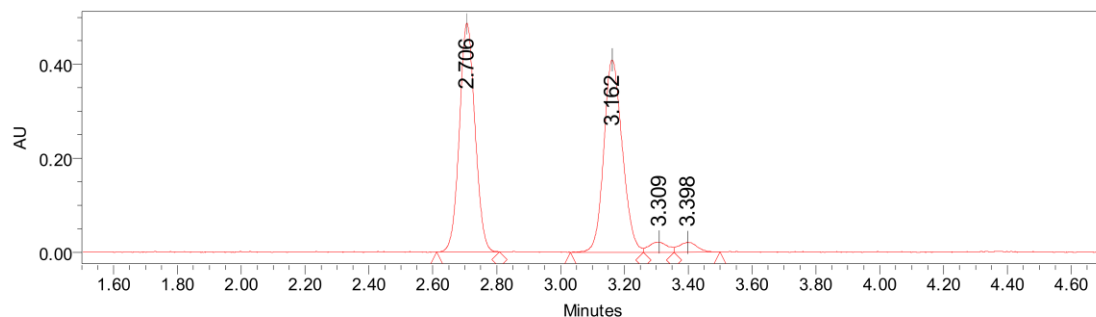

|   | RT    | Area    | % Area | Height |
|---|-------|---------|--------|--------|
| 1 | 2.706 | 1657773 | 47.52  | 487535 |
| 2 | 3.162 | 1656171 | 47.47  | 409460 |
| 3 | 3.309 | 88843   | 2.55   | 21832  |
| 4 | 3.398 | 85810   | 2.46   | 20984  |

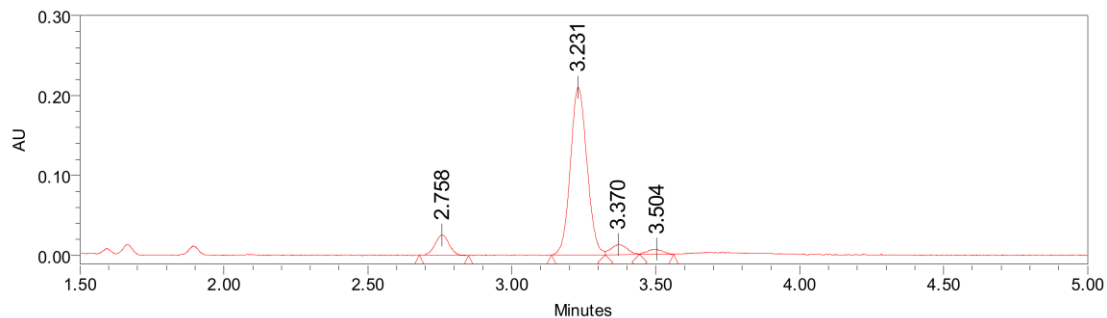

|   | RT    | Area   | % Area | Height |
|---|-------|--------|--------|--------|
| 1 | 2.758 | 85359  | 8.55   | 25244  |
| 2 | 3.231 | 838959 | 84.03  | 209826 |
| 3 | 3.370 | 49816  | 4.99   | 12396  |
| 4 | 3.504 | 24234  | 2.43   | 6435   |

**(-)-2,3-diphenylcyclobutan-1-one (28a)**

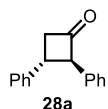

Prepared according to **general procedure**: 36 h, 46% yield, 95.6% ee.

$[\alpha]_D^{23} = -131.0$  (c = 1.0, CHCl<sub>3</sub>)

The ee value was determined by the chiral UPC<sup>2</sup> analysis (CHIRALPAK® IG-3, CO<sub>2</sub>/MeOH = 95/05, v = 2.0 mL/min, λ = 205.0 nm), t (minor) = 2.343 min, t (major) = 2.645 min.

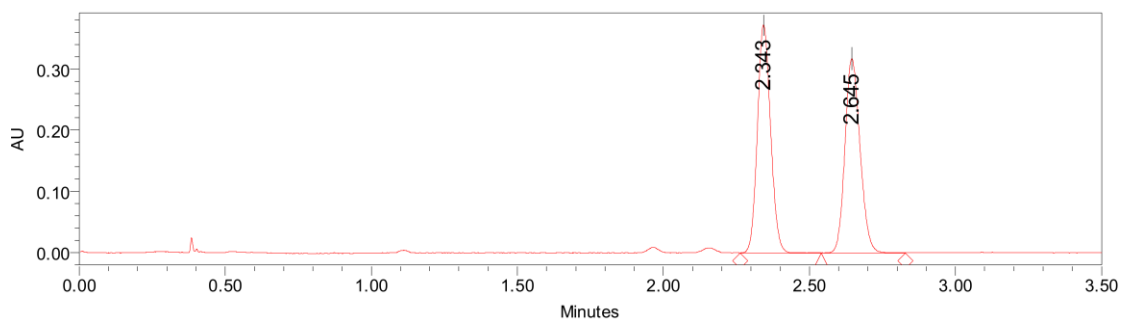

|   | RT    | Area    | % Area | Height |
|---|-------|---------|--------|--------|
| 1 | 2.343 | 1177717 | 50.73  | 373975 |
| 2 | 2.645 | 1143703 | 49.27  | 317688 |

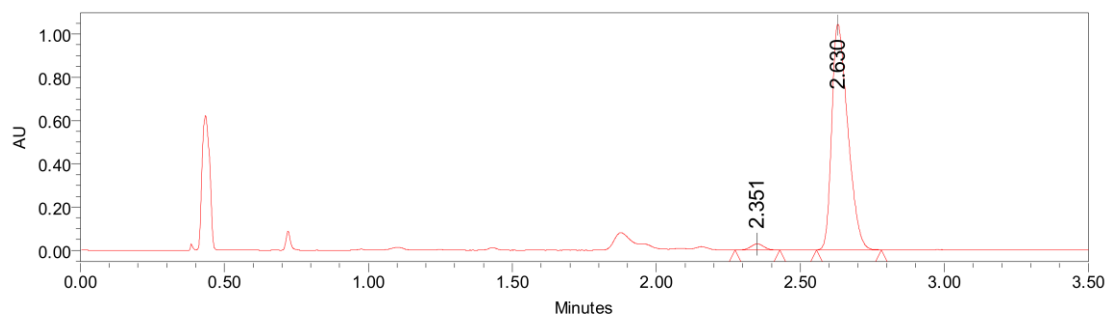

|   | RT    | Area    | % Area | Height  |
|---|-------|---------|--------|---------|
| 1 | 2.351 | 90351   | 2.19   | 28489   |
| 2 | 2.630 | 4039982 | 97.81  | 1043397 |

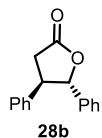

**(4R,5S)-4,5-diphenyldihydrofuran-2(3H)-one (28b)**

Prepared according to **general procedure**: 36 h, 52% yield, 93.6% ee, **28b/28c** = 12.5/1, white solid, m. p.: 108-109 °C.

$[\alpha]_D^{23} = +114.0$  (c = 1.0, CHCl<sub>3</sub>)

**<sup>1</sup>H NMR** (600 MHz, CDCl<sub>3</sub>) δ 7.40-7.27 (m, 6H), 7.22-7.14 (m, 4H), 5.42 (d, *J* = 8.5 Hz, 1H), 3.59 (dt, *J* = 10.4, 9.0 Hz, 1H), 3.05 (dd, *J* = 17.4, 8.4 Hz, 1H), 2.92 (dd, *J* = 17.4, 10.8 Hz, 1H).

**<sup>13</sup>C NMR** (150 MHz, CDCl<sub>3</sub>) δ 175.2, 137.9, 137.7, 129.1, 128.6, 127.8, 127.3, 125.6, 87.4, 50.5, 37.1.

**HRMS** (ESI) calculated for C<sub>16</sub>H<sub>15</sub>O<sub>2</sub> [M+H<sup>+</sup>]: 239.1067, found: 239.1066.

**FT-IR** (cm<sup>-1</sup>): 3032, 2924, 1783, 1455, 1269, 1195, 1141, 1000, 765, 698.

**MS** (EI) *m/z* (%): 104 (100), 77 (60), 132 (55), 51 (54), 178 (45), 115 (43), 238 (40).

The ee value was determined by the chiral UPC<sup>2</sup> analysis (CHIRALPAK<sup>®</sup> IG-3, CO<sub>2</sub>/MeOH = 95/05, *v* = 2.0 mL/min, λ = 205.0 nm), *t<sub>b</sub>* (major) = 3.735 min, *t<sub>b</sub>* (minor) = 6.154 min.

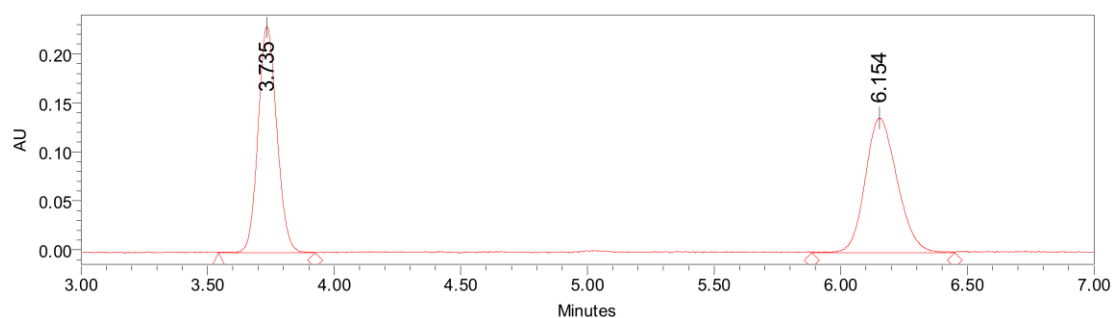

|   | RT    | Area    | % Area | Height |
|---|-------|---------|--------|--------|
| 1 | 3.735 | 1191141 | 49.71  | 230722 |
| 2 | 6.154 | 1204798 | 50.29  | 137462 |

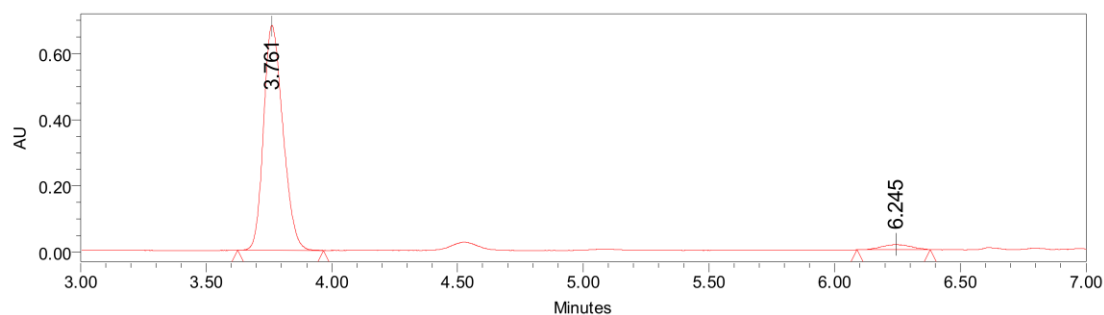

|   | RT    | Area    | % Area | Height |
|---|-------|---------|--------|--------|
| 1 | 3.761 | 3643873 | 96.81  | 680090 |
| 2 | 6.245 | 120197  | 3.19   | 15175  |

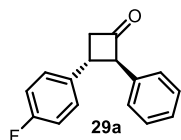

**(-)-3-(4-fluorophenyl)-2-phenylcyclobutan-1-one (29a)**

Prepared according to **general procedure**: 37 h, 49% yield, 96.0% ee.

$[\alpha]_D^{24} = -44.0$  (c = 1.0, CHCl<sub>3</sub>)

The ee value was determined by the chiral UPC<sup>2</sup> analysis (CHIRALPAK<sup>®</sup> AD-3, CO<sub>2</sub>/MeOH = 95/05, *v* = 2.0 mL/min, λ = 205.0 nm), *t* (minor) = 1.400 min, *t* (major) = 1.782 min.

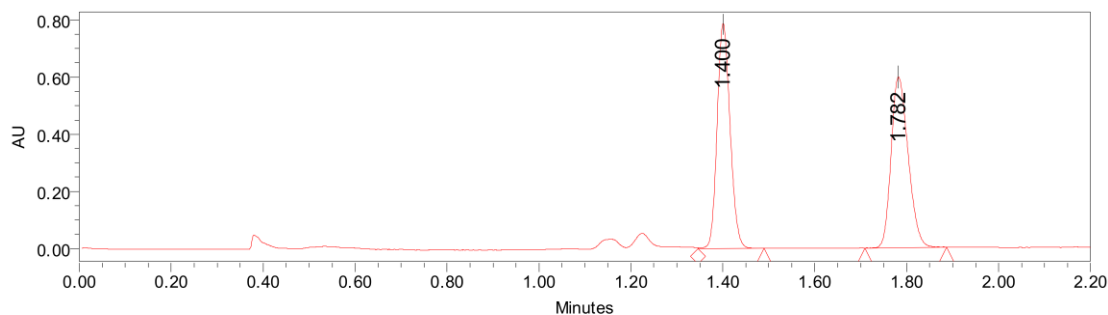

|   | RT    | Area    | % Area | Height |
|---|-------|---------|--------|--------|
| 1 | 1.400 | 1549261 | 50.04  | 788175 |
| 2 | 1.782 | 1546619 | 49.96  | 597606 |

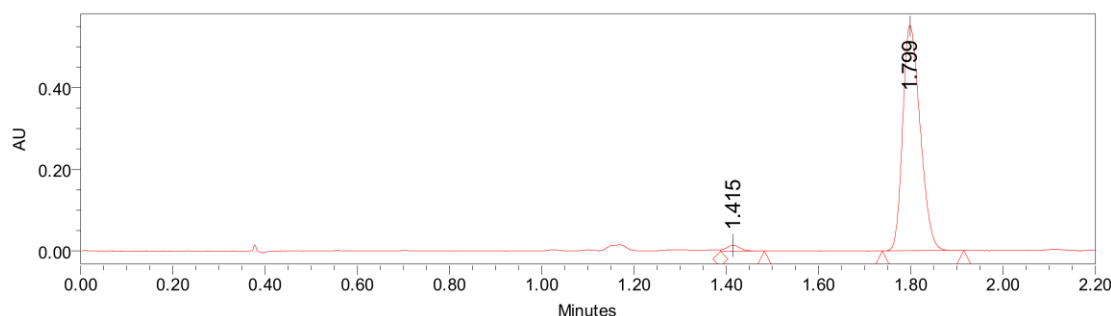

|   | RT    | Area    | % Area | Height |
|---|-------|---------|--------|--------|
| 1 | 1.415 | 29851   | 2.01   | 14080  |
| 2 | 1.799 | 1454547 | 97.99  | 551957 |

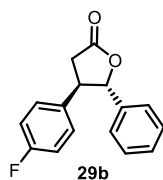

**(+)-4-(4-fluorophenyl)-5-phenyldihydrofuran-2(3H)-one (29b)**

Prepared according to **general procedure**: 37 h, 50% yield, 93.8% ee, **29b/29c** = 8.3/1, white solid, m. p.: 87-89 °C.

$[\alpha]_D^{24} = +56.0$  ( $c = 1.0$ ,  $\text{CHCl}_3$ )

$^1\text{H NMR}$  (600 MHz,  $\text{CDCl}_3$ )  $\delta$  7.38-7.31 (m, 3H), 7.21-7.16 (m, 2H), 7.16-7.11 (m, 2H), 7.06-7.00 (m, 2H), 5.36 (d,  $J = 8.4$  Hz, 1H), 3.58 (dt,  $J = 10.8, 8.4$  Hz, 1H), 3.05 (dd,  $J = 17.4, 8.4$  Hz, 1H), 2.89 (dd,  $J = 17.4, 10.8$  Hz, 1H).

$^{13}\text{C NMR}$  (150 MHz,  $\text{CDCl}_3$ )  $\delta$  174.9, 162.2 (d,  $J = 245.4$  Hz), 137.4, 133.4 (d,  $J = 3.2$  Hz), 128.9 (d,  $J = 8.0$  Hz), 128.8, 128.7, 125.6, 116.0 (d,  $J = 21.9$  Hz), 87.4, 49.9, 37.1.

$^{19}\text{F NMR}$  (376 MHz,  $\text{CDCl}_3$ )  $\delta$  -114.11.

**HRMS** (ESI) calculated for  $\text{C}_{16}\text{H}_{13}\text{NaO}_2\text{F}$  [ $\text{M}+\text{Na}^+$ ]: 279.0792, found: 279.0793.

**FT-IR** ( $\text{cm}^{-1}$ ): 3035, 2925, 1785, 1512, 1270, 1144, 1000, 840, 700, 522.

**MS** (EI)  $m/z$  (%): 122 (100), 121 (70), 96 (57), 77 (56), 101 (55), 51 (53), 228 (40), 256 (30).

The ee value was determined by the chiral UPC<sup>2</sup> analysis (CHIRALPAK<sup>®</sup> AD-3,  $\text{CO}_2/\text{MeOH} = 95/05$ ,  $v = 2.0$  mL/min,  $\lambda = 205.0$  nm),  $t_b$  (major) = 2.430 min,  $t_b$  (minor) = 4.063 min,  $t_c$  (minor) = 2.827 min,  $t_c$  (major) = 6.994 min.

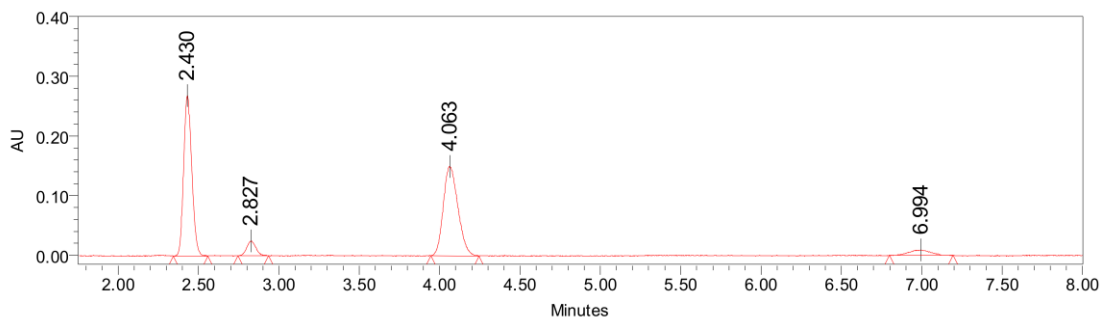

|   | RT    | Area   | % Area | Height |
|---|-------|--------|--------|--------|
| 1 | 2.430 | 951795 | 45.61  | 268839 |
| 2 | 2.827 | 99399  | 4.76   | 24900  |
| 3 | 4.063 | 948675 | 45.46  | 150041 |
| 4 | 6.994 | 86947  | 4.17   | 9286   |

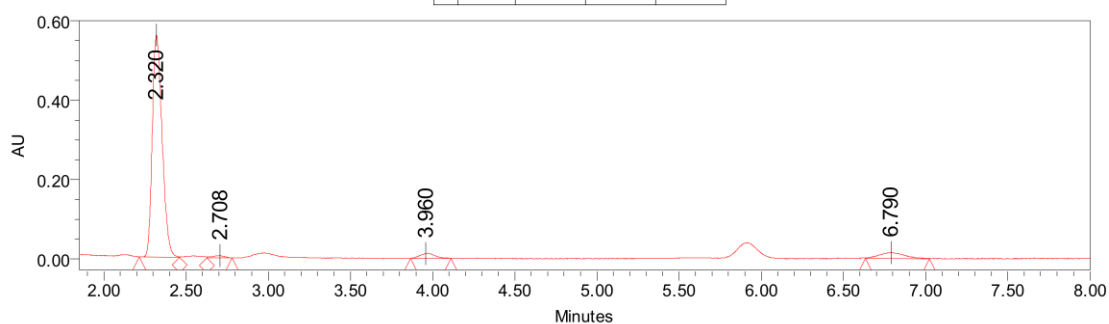

|   | RT    | Area    | % Area | Height |
|---|-------|---------|--------|--------|
| 1 | 2.320 | 2325046 | 90.18  | 559909 |
| 2 | 2.708 | 26379   | 1.02   | 5644   |
| 3 | 3.960 | 74106   | 2.87   | 12171  |
| 4 | 6.790 | 152829  | 5.93   | 14894  |

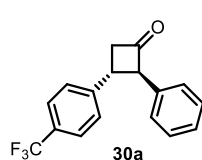

**(-)-2-phenyl-3-(4-(trifluoromethyl)phenyl)cyclobutan-1-one (30a)**

Prepared according to **general procedure**: 37 h, 48% yield, 95.2% ee.

$[\alpha]_D^{24} = -75.0$  ( $c = 1.0$ ,  $\text{CHCl}_3$ )

The ee value was determined by the chiral UPC<sup>2</sup> analysis (CHIRALPAK<sup>®</sup> AD-3,  $\text{CO}_2/\text{MeOH} = 98/02$ ,  $v = 2.0$  mL/min,  $\lambda = 220.0$  nm),  $t$  (minor) = 1.592 min,  $t$  (major) = 1.843 min.

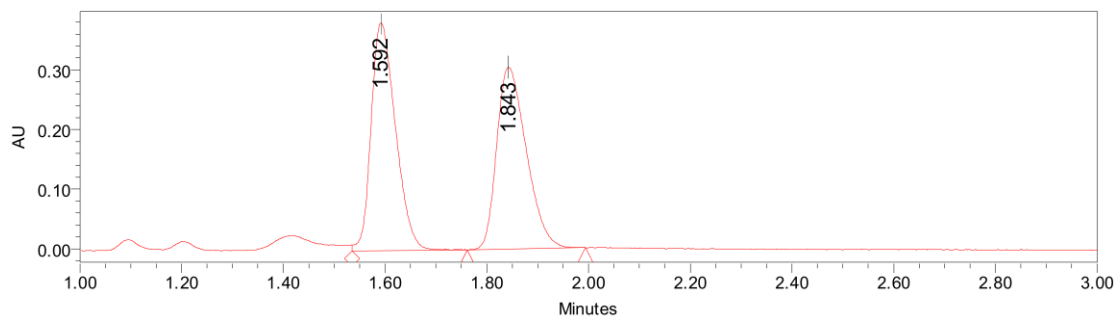

|   | RT    | Area    | % Area | Height |
|---|-------|---------|--------|--------|
| 1 | 1.592 | 1273554 | 50.79  | 381738 |
| 2 | 1.843 | 1234137 | 49.21  | 304484 |



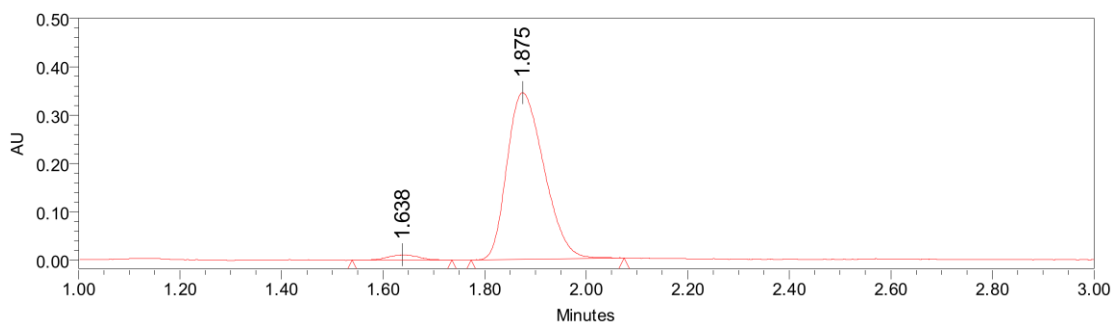

|   | RT    | Area    | % Area | Height |
|---|-------|---------|--------|--------|
| 1 | 1.638 | 42718   | 2.38   | 10497  |
| 2 | 1.875 | 1749222 | 97.62  | 344740 |

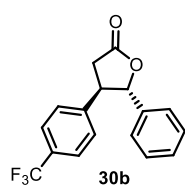

**(+)-5-phenyl-4-(4-(trifluoromethyl)phenyl)dihydrofuran-2(3H)-one (30b)**

Prepared according to **general procedure**: 37 h, 50% yield, 93.1% ee, **30b/30c** = 9.1/1, white solid, m. p.: 99-100 °C.

$[\alpha]_D^{24} = +78.0$  (c = 1.0, CHCl<sub>3</sub>)

**<sup>1</sup>H NMR** (600 MHz, CDCl<sub>3</sub>) δ 7.61 (d, *J* = 7.8 Hz, 2H), 7.37-7.33 (m, 3H), 7.31 (d, *J* = 7.8 Hz, 2H), 7.23-7.16 (m, 2H), 5.41 (d, *J* = 8.4 Hz, 1H), 3.68 (dt, *J* = 10.2, 8.5 Hz, 1H), 3.10 (dd, *J* = 17.4, 8.4 Hz, 1H), 2.93 (dd, *J* = 17.4, 10.8 Hz, 1H).

**<sup>13</sup>C NMR** (150 MHz, CDCl<sub>3</sub>) δ 174.6, 141.9, 137.2, 130.0 (q, *J* = 32.4 Hz), 128.9, 128.8, 127.8, 126.0 (q, *J* = 3.7 Hz), 125.6, 123.8 (q, *J* = 270.4 Hz), 87.0, 50.3, 36.8.

**<sup>19</sup>F NMR** (376 MHz, CDCl<sub>3</sub>) δ -62.62.

**HRMS** (ESI) calculated for C<sub>17</sub>H<sub>13</sub>NaO<sub>2</sub>F<sub>3</sub> [M+Na<sup>+</sup>]: 329.0760, found: 329.0762.

**FT-IR** (cm<sup>-1</sup>): 3035, 1788, 1327, 1123, 1070, 700.

**MS** (EI) *m/z* (%): 172 (100), 107 (60), 105 (55), 77 (50), 151 (50), 180 (45), 286 (45), 306 (30).

The ee value was determined by the chiral UPC<sup>2</sup> analysis (CHIRALPAK<sup>®</sup> OD-3, CO<sub>2</sub>/MeOH = 98/02, *v* = 2.0 mL/min, *λ* = 205.0 nm), *t*<sub>b</sub> (minor) = 3.888 min, *t*<sub>b</sub> (major) = 4.188 min, *t*<sub>c</sub> (major) = 4.546 min, *t*<sub>c</sub> (minor) = 5.117 min.

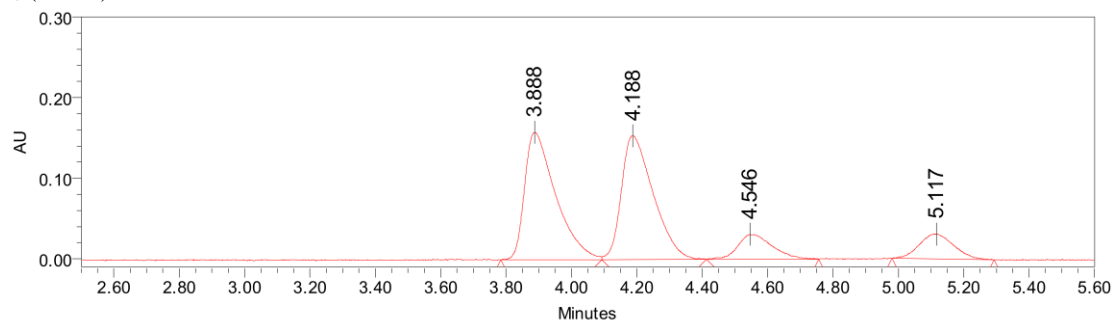

|   | RT    | Area    | % Area | Height |
|---|-------|---------|--------|--------|
| 1 | 3.888 | 1048107 | 41.20  | 158253 |
| 2 | 4.188 | 1039228 | 40.85  | 153519 |
| 3 | 4.546 | 226233  | 8.89   | 30761  |
| 4 | 5.117 | 230548  | 9.06   | 31099  |

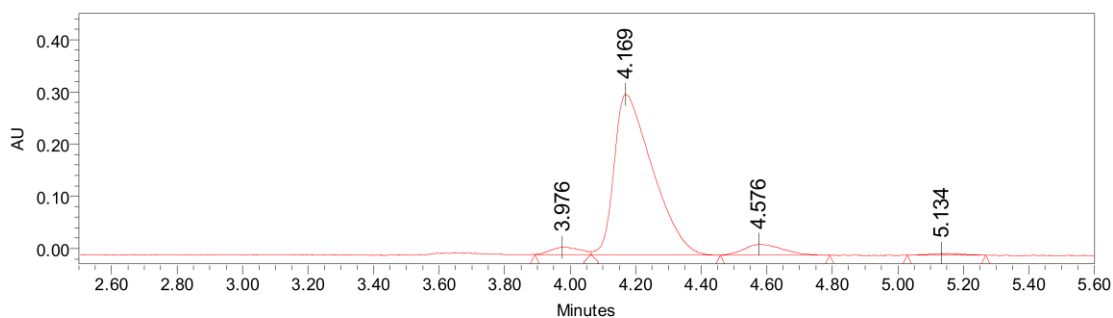

|   | RT    | Area    | % Area | Height |
|---|-------|---------|--------|--------|
| 1 | 3.976 | 89266   | 3.20   | 14560  |
| 2 | 4.169 | 2497288 | 89.60  | 307317 |
| 3 | 4.576 | 173538  | 6.23   | 20730  |
| 4 | 5.134 | 27105   | 0.97   | 3837   |

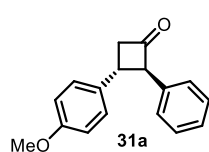

**(-)-3-(4-methoxyphenyl)-2-phenylcyclobutan-1-one (31a)**

Prepared according to **general procedure**: 37 h, 48% yield, 98.1% ee.

$[\alpha]_D^{24} = -178.0$  (c = 1.0, CHCl<sub>3</sub>)

The ee value was determined by the chiral UPC<sup>2</sup> analysis (CHIRALPAK<sup>®</sup> IG-3, CO<sub>2</sub>/MeOH = 90/10, v = 2.0 mL/min, λ = 225.0 nm), t (minor) = 2.576 min, t (major) = 3.524 min.

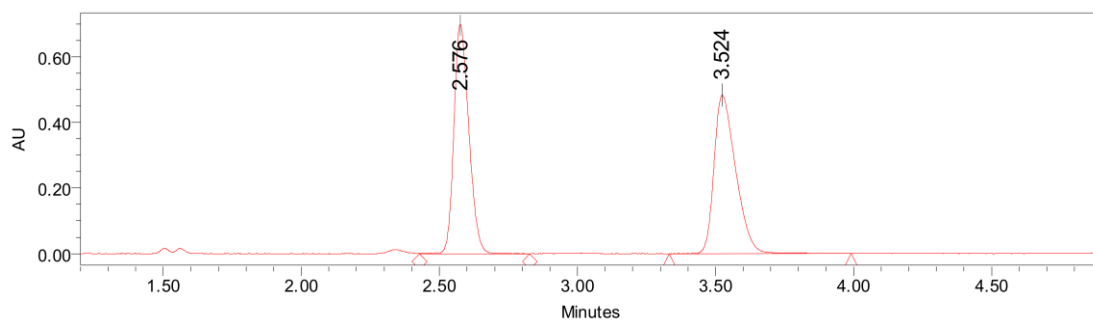

|   | RT    | Area    | % Area | Height |
|---|-------|---------|--------|--------|
| 1 | 2.576 | 2631136 | 49.83  | 698890 |
| 2 | 3.524 | 2649499 | 50.17  | 483460 |

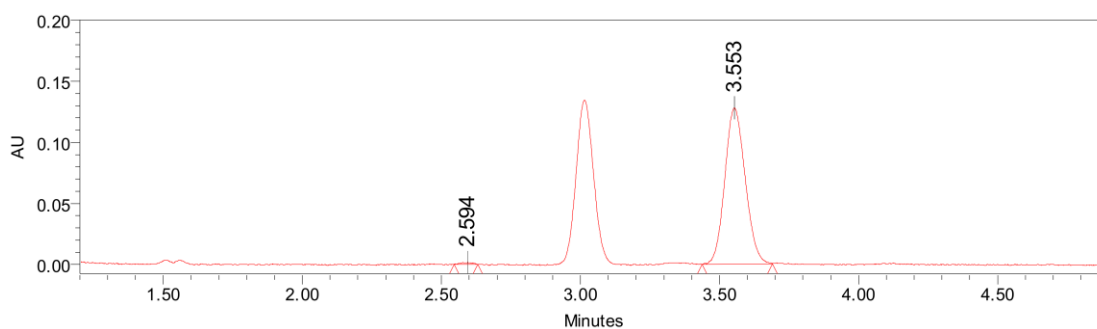

|   | RT    | Area   | % Area | Height |
|---|-------|--------|--------|--------|
| 1 | 2.594 | 4053   | 0.62   | 1418   |
| 2 | 3.553 | 650909 | 99.38  | 127806 |

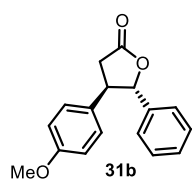

**(+)-4-(4-methoxyphenyl)-5-phenyldihydrofuran-2(3H)-one (31b)**

Prepared according to **general procedure**: 37 h, 51% yield, 95.6% ee, **31b/31c** = 12.5/1, colorless liquid.

$[\alpha]_D^{24} = +148.0$  ( $c = 1.0$ ,  $\text{CHCl}_3$ )

**$^1\text{H NMR}$**  (600 MHz,  $\text{CDCl}_3$ )  $\delta$  7.36-7.29 (m, 3H), 7.23-7.14 (m, 2H), 7.08 (d,  $J = 8.4$  Hz, 2H), 6.87 (d,  $J = 8.4$  Hz, 2H), 5.36 (d,  $J = 8.4$  Hz, 1H), 3.79 (s, 3H), 3.53 (dt,  $J = 10.7, 8.6$  Hz, 1H), 3.02 (dd,  $J = 17.4, 8.4$  Hz, 1H), 2.88 (dd,  $J = 17.4, 11.1$  Hz, 1H).

**$^{13}\text{C NMR}$**  (150 MHz,  $\text{CDCl}_3$ )  $\delta$  175.3, 159.1, 137.7, 129.6, 128.6, 128.6, 128.4, 128.4, 125.6, 125.6, 114.4, 87.6, 55.2, 49.9, 37.2.

**HRMS** (ESI) calculated for  $\text{C}_{17}\text{H}_{17}\text{O}_3$   $[\text{M}+\text{H}^+]$ : 269.1172, found: 269.1171.

**FT-IR** ( $\text{cm}^{-1}$ ): 2933, 2836, 1785, 1515, 1253, 1180, 1034, 1000, 700.

**MS** (EI)  $m/z$  (%): 134 (100), 91 (60), 119 (58), 135 (55), 77 (50), 152 (45), 165 (43), 268 (30).

The ee value was determined by the chiral UPC<sup>2</sup> analysis (CHIRALPAK<sup>®</sup> IG-3,  $\text{CO}_2/\text{MeOH} = 90/10$ ,  $v = 2.0$  mL/min,  $\lambda = 225.0$  nm),  $t_b$  (major) = 3.009 min,  $t_b$  (minor) = 5.390 min,  $t_c$  (major) = 11.644 min,  $t_c$  (minor) = 5.117 min.

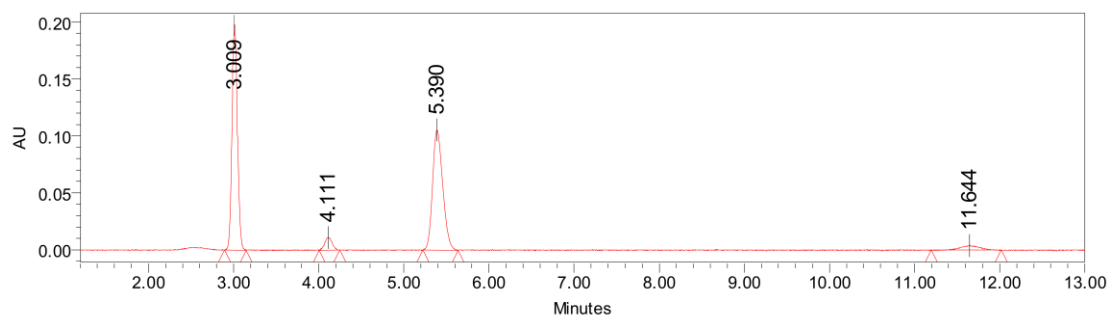

|   | RT     | Area   | % Area | Height |
|---|--------|--------|--------|--------|
| 1 | 3.009  | 879238 | 46.54  | 198297 |
| 2 | 4.111  | 67608  | 3.58   | 11172  |
| 3 | 5.390  | 876783 | 46.41  | 105749 |
| 4 | 11.644 | 65574  | 3.47   | 4127   |

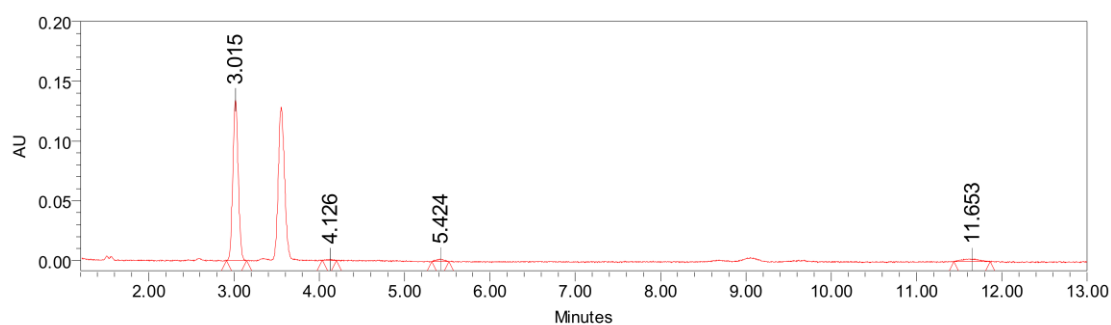

|   | RT     | Area   | % Area | Height |
|---|--------|--------|--------|--------|
| 1 | 3.015  | 589783 | 92.39  | 134722 |
| 2 | 4.126  | 4970   | 0.78   | 1185   |
| 3 | 5.424  | 14241  | 2.23   | 2303   |
| 4 | 11.653 | 29340  | 4.60   | 2139   |

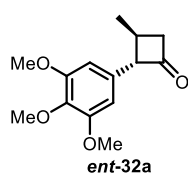

**(+)-3-methyl-2-(3,4,5-trimethoxyphenyl)cyclobutan-1-one (*ent*-32a)**

Prepared according to **indicated procedure d**: 32 h, 40% yield, 91.0% ee, colorless liquid.

$[\alpha]_D^{26} = +45.0$  ( $c=1.0$ ,  $\text{CHCl}_3$ )

The ee value was determined by the chiral UPC<sup>2</sup> analysis (Trefoil<sup>®</sup> CEL 1,  $\text{CO}_2/\text{MeOH} = 95/05$ ,  $v = 2.0$  mL/min,  $\lambda = 205.0$  nm),  $t$  (minor) = 1.627 min,  $t$  (major) = 2.137 min.

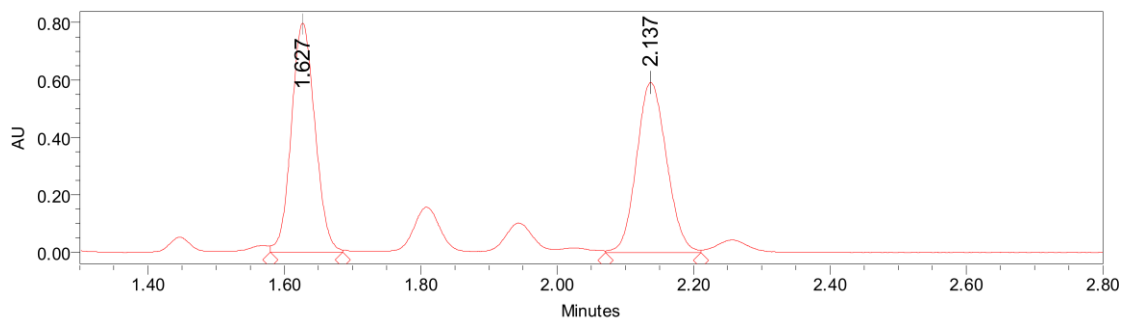

|   | RT    | Area    | % Area | Height |
|---|-------|---------|--------|--------|
| 1 | 1.627 | 1924233 | 51.44  | 798179 |
| 2 | 2.137 | 1816561 | 48.56  | 592208 |

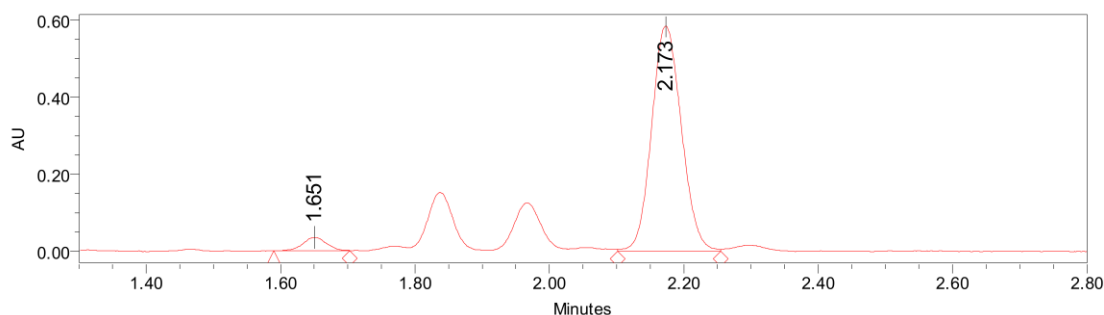

|   | RT    | Area    | % Area | Height |
|---|-------|---------|--------|--------|
| 1 | 1.651 | 85087   | 4.51   | 34255  |
| 2 | 2.173 | 1801260 | 95.49  | 583849 |

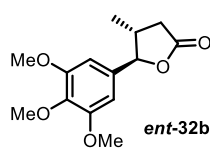

**(-)-4-methyl-5-(3,4,5-trimethoxyphenyl)dihydrofuran-2(3H)-one (*ent*-32b)**

Prepared according to **indicated procedure d**: 32 h, 48% yield, 92.4% ee, **32b/32c** = 19/1, yellow liquid.

$[\alpha]_D^{26} = -5.0$  ( $c = 1.0$ ,  $\text{CHCl}_3$ )

The ee value was determined by the chiral UPC<sup>2</sup> analysis (CHIRALPAK<sup>®</sup> IG-3,  $\text{CO}_2/\text{MeOH} = 90/10$ ,  $v = 2.0$  mL/min,  $\lambda = 205.0$  nm),  $t_b$  (major) = 2.837 min,  $t_b$  (minor) = 4.250 min,  $t_c$  (major) = 3.844 min,  $t_c$  (minor) = 4.647 min.

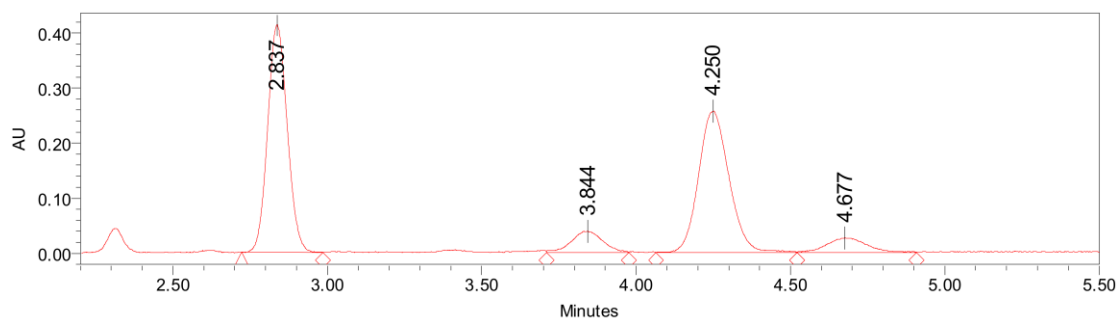

|   | RT    | Area    | % Area | Height |
|---|-------|---------|--------|--------|
| 1 | 2.837 | 1822597 | 44.49  | 413263 |
| 2 | 3.844 | 276543  | 6.75   | 38775  |
| 3 | 4.250 | 1758816 | 42.93  | 256854 |
| 4 | 4.677 | 238914  | 5.83   | 26477  |

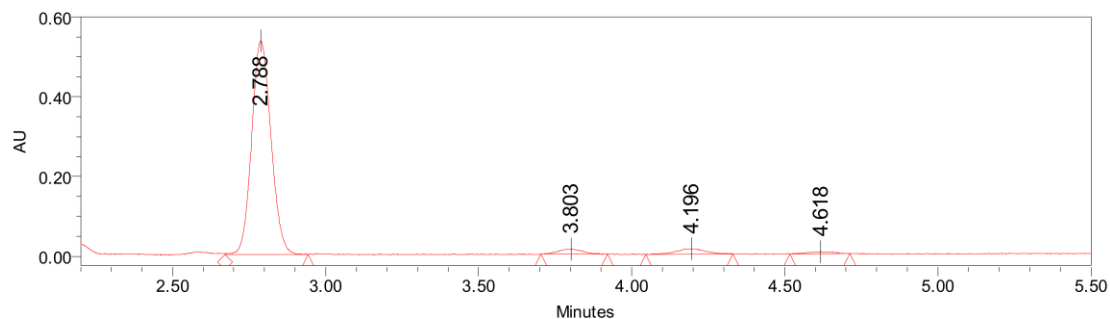

|   | RT    | Area    | % Area | Height |
|---|-------|---------|--------|--------|
| 1 | 2.788 | 2358562 | 92.33  | 536067 |
| 2 | 3.803 | 69091   | 2.70   | 12399  |
| 3 | 4.196 | 93119   | 3.65   | 13719  |
| 4 | 4.618 | 33651   | 1.32   | 5618   |

## 9. Optimization of direct $\alpha$ -arylation of cyclobutanone (Table S4)<sup>a</sup>

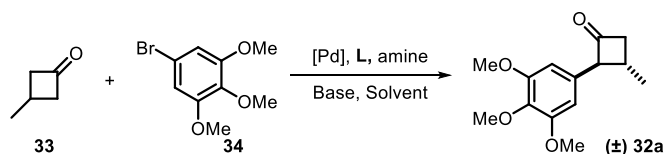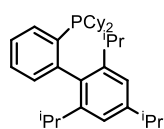

X-Phos

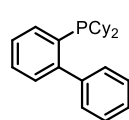

Cy-John-Phos

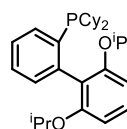

Ru-Phos

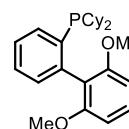

S-Phos

| entry           | [pd]                                              | Ligand       | Amine         | Base                                              | Solvent     | Yield% | dr    |
|-----------------|---------------------------------------------------|--------------|---------------|---------------------------------------------------|-------------|--------|-------|
| 1               | Pd(OAc) <sub>2</sub>                              | X-Phos       | Pyrrolidine   | K <sub>3</sub> PO <sub>4</sub>                    | 1,4-Dioxane | 24     | 3.2:1 |
| 2               | Pd(CF <sub>3</sub> CO <sub>2</sub> ) <sub>2</sub> | X-Phos       | Pyrrolidine   | K <sub>3</sub> PO <sub>4</sub>                    | 1,4-Dioxane | 17     | 3.0:1 |
| 3               | Pd(PivO) <sub>2</sub>                             | X-Phos       | Pyrrolidine   | K <sub>3</sub> PO <sub>4</sub>                    | 1,4-Dioxane | 48     | 4.1:1 |
| 4               | Pd(PPh <sub>3</sub> ) <sub>4</sub>                | X-Phos       | Pyrrolidine   | K <sub>3</sub> PO <sub>4</sub>                    | 1,4-Dioxane | N.P.   | -     |
| 5               | Pd(PivO) <sub>2</sub>                             | Cy-John-Phos | Pyrrolidine   | K <sub>3</sub> PO <sub>4</sub>                    | 1,4-Dioxane | trace  | -     |
| 6               | Pd(PivO) <sub>2</sub>                             | Ru-Phos      | Pyrrolidine   | K <sub>3</sub> PO <sub>4</sub>                    | 1,4-Dioxane | 34     | 3.2:1 |
| 7               | Pd(PivO) <sub>2</sub>                             | Sphos        | Pyrrolidine   | K <sub>3</sub> PO <sub>4</sub>                    | 1,4-Dioxane | 42     | 3.4:1 |
| 8 <sup>b</sup>  | Pd(PivO) <sub>2</sub>                             | X-Phos       | Pyrrolidine   | K <sub>3</sub> PO <sub>4</sub>                    | THF         | 41     | 4.1:1 |
| 9               | Pd(PivO) <sub>2</sub>                             | X-Phos       | Pyrrolidine   | K <sub>3</sub> PO <sub>4</sub>                    | Toluene     | 26     | 3.7:1 |
| 10              | Pd(PivO) <sub>2</sub>                             | X-Phos       | Pyrrolidine   | K <sub>3</sub> PO <sub>3</sub> •3H <sub>2</sub> O | 1,4-Dioxane | 52     | 4.2:1 |
| 11              | Pd(PivO) <sub>2</sub>                             | X-Phos       | Pyrrolidine   | CsF                                               | 1,4-Dioxane | 53     | 4.2:1 |
| 12              | Pd(PivO) <sub>2</sub>                             | X-Phos       | Dibenzylamine | CsF                                               | 1,4-Dioxane | 60     | 5.6:1 |
| 13              | Pd(PivO) <sub>2</sub>                             | X-Phos       | Piperidine    | CsF                                               | 1,4-Dioxane | 47     | 3.7:1 |
| 14 <sup>c</sup> | Pd(PivO) <sub>2</sub>                             | X-Phos       | Dibenzylamine | CsF                                               | 1,4-Dioxane | 70     | 5.6:1 |
| 15 <sup>d</sup> | Pd(PivO) <sub>2</sub>                             | X-Phos       | Dibenzylamine | CsF                                               | 1,4-Dioxane | 65     | 5.6:1 |

<sup>a</sup> Reaction condition: the reactions were performed with **33** (1.5 equiv), **34** (0.2 mmol), [Pd] (10 mol%), ligand (20

mol%), amine (20 mol%), base (2.0 equiv) in solvent (2 mL) at 110 °C (oil temperature). Yield and dr was determined by NMR. <sup>b</sup> The oil temperature was 80 °C. <sup>c</sup> **33** (2.0 equiv) was used and the isolated yield of the reaction was 65 %. <sup>d</sup> 1.0 g **34** and **33** (2.0 equiv) was used. Isolated yield.

## 10. Synthesis of eupomatilone-5 and eupomatilone-6

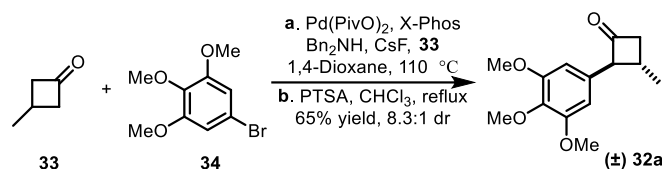

**Compound (±) 32a:** A 1,4-dioxane (10 mL) solution of 3-methylcyclobutan-1-one (681 mg, 8.1 mmol, 2.0 equiv), 5-bromo-1,2,3-trimethoxybenzene (1.0 g, 4.0 mmol, 1.0 equiv), Pd(PivO)<sub>2</sub> (125 mg, 0.4 mmol, 0.1 equiv), X-phos (386 mg, 0.8 mmol, 0.2 equiv), dibenzylamine (156 μL, 0.8 mmol, 0.2 equiv), CsF (1.23 g, 8.0 mmol, 2.0 equiv) was degassed with argon gas for 5 min and heated to 110 °C for 16 h before it was cooled down to room temperature. Water (10 mL) and EA was added and the mixture was extracted with EA three times. The combined organic layers were washed with brine three times, dried (NaSO<sub>4</sub>), concentrated and the crude product was dissolved in CHCl<sub>3</sub> (20 mL). *p*-toluenesulfonic acid monohydrate (228 mg, 1.2 mmol, 0.3 equiv) was added, and the mixture was refluxing for 3 h before it was cooled down to room temperature. Water (10 mL) and EA was added and the mixture was extracted with EA three times. The combined organic layers were washed with water, brine, dried (NaSO<sub>4</sub>), concentrated and the crude product was purified by flash column chromatography on silica gel to afford (±) **32a** as colorless liquid (655 mg, 65% yield, 8.3:1 dr).

<sup>1</sup>H NMR (400 MHz, CDCl<sub>3</sub>) δ 6.44 (s, 2H), 3.98-3.93 (m, 1H), 3.86 (s, 6H), 3.82 (s, 3H), 3.19-3.08 (m, 1H), 2.87-2.76 (m, 1H), 2.69-2.57 (m, 1H), 1.51 (d, *J* = 6.4 Hz, 3H).

<sup>13</sup>C NMR (100 MHz, CDCl<sub>3</sub>) δ 206.3, 153.3, 137.0, 131.7, 103.9, 71.0, 60.7, 56.0, 51.4, 27.9, 21.3.

HRMS (ESI) calculated for C<sub>14</sub>H<sub>19</sub>O<sub>4</sub> [M+H<sup>+</sup>]: 251.1278, found: 251.1279.

FT-IR (cm<sup>-1</sup>): 3534, 2959, 1776, 1586, 1455, 1420, 1242, 1127, 1010.

MS (EI) *m/z* (%): 208 (100), 193 (60), 250 (29), 209 (15), 165 (10).

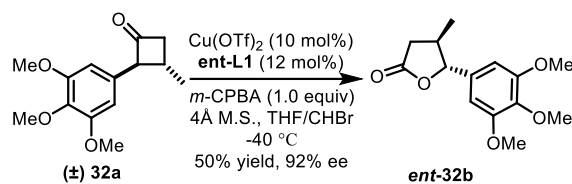

**Compound ent-32b:** The mixture of anhydrous Cu(OTf)<sub>2</sub> (7.2 mg, 0.02 mmol), *ent-L1* (6.4 mg, 0.024 mmol) was stirred in THF (1 mL) for 1h at room temperature. The 4Å molecular sieves (60 mg), Al(O<sup>*i*</sup>Pr)<sub>3</sub> (20.4 mg, 50% mol) and (±)-**32a** was added to an oven-dried reaction tube, then the chiral catalyst solution prepared beforehand, THF (1 mL), CHBr<sub>3</sub> was added, the reaction mixture was cooled to -40 °C for 20 min. Then, the *m*-CPBA (0.2 mmol) was added to the reaction mixture a stirred at -40 °C. The Na<sub>2</sub>SO<sub>3</sub> (126 mg, 1.0 mmol) was added after the reaction mixture was stirred for 32 h at -40 °C, and stirred for more 2 h at -40 °C. The DCM (10 mL) was added, the solution was extracted with DCM. The combined organic layers were washed with brine, dried (NaSO<sub>4</sub>), concentrated and the crude product was purified by flash column chromatography on silica gel at -20 °C to afford *ent-32b* (25.6 mg, 48% yield) as a yellow liquid, 92.4% ee.

$[\alpha]_D^{27} = -5.0$  (c = 1.0, CHCl<sub>3</sub>)

<sup>1</sup>H NMR (400 MHz, CDCl<sub>3</sub>) δ 6.54 (s, 2H), 4.87 (d, *J* = 8.5 Hz, 1H), 3.88 (s, 6H), 3.85 (s, 3H), 2.80 (dd, *J* = 16.9, 7.6 Hz, 1H), 2.56-2.42 (m, 1H), 2.35 (dd, *J* = 16.9, 10.7 Hz, 1H), 1.21 (d, *J* = 6.5 Hz, 3H).

<sup>13</sup>C NMR (100 MHz, CDCl<sub>3</sub>) δ 176.0, 153.4, 138.1, 133.4, 102.9, 88.2, 60.8, 56.2, 39.8, 37.2, 16.5.

HRMS (ESI) calculated for C<sub>14</sub>H<sub>18</sub>NaO<sub>5</sub> [M+Na<sup>+</sup>]: 289.1046, found: 289.1046.

FT-IR (cm<sup>-1</sup>): 3522, 2964, 1776, 1593, 1463, 1240, 1126, 1005, 987.

MS (EI) *m/z* (%): 266 (100), 196 (45), 181 (40), 169 (25), 125 (25), 167 (15).

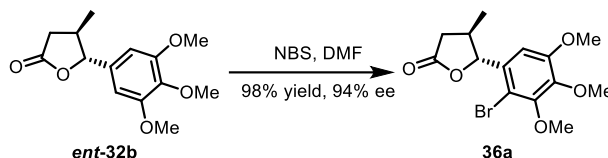

**Compound 36a:** To a solution of **ent-32b** (300 mg, 1.1 mmol) in DMF (2 mL) was added N-Bromosuccinimide (220 mg, 1.2 mmol) at 0 °C, stirred for 12 h at room temperature. Water (10 mL) and EA was added and the solution was extracted with EA three times. The combined organic layers were washed with brine ten times, dried (NaSO<sub>4</sub>), concentrated and the crude product was purified by column chromatography on silica gel to afford **36a** (380 mg, 98% yield) as colorless liquid, 94.1% ee.

$[\alpha]_D^{27} = +24.0$  (c = 1.0, CHCl<sub>3</sub>)

<sup>1</sup>H NMR (600 MHz, CDCl<sub>3</sub>) δ 6.67 (s, 1H), 5.44 (d, *J* = 5.4 Hz, 1H), 3.91 (s, 3H), 3.89 (s, 3H), 3.86 (s, 3H), 2.75 (dd, *J* = 17.4, 7.8 Hz, 1H), 2.61-2.49 (m, 1H), 2.29 (dd, *J* = 17.4, 6.6 Hz, 1H), 1.33 (d, *J* = 7.2 Hz, 3H).

<sup>13</sup>C NMR (150 MHz, CDCl<sub>3</sub>) δ 176.6, 153.2, 150.9, 143.0, 133.4, 108.2, 105.1, 86.0, 61.0, 56.2, 38.9, 35.8, 18.2.

HRMS (ESI) calculated for C<sub>14</sub>H<sub>17</sub>BrNaO<sub>5</sub> [M+Na<sup>+</sup>]: 367.0152, 369.0131, found: 367.0152, 369.0132.

FT-IR (cm<sup>-1</sup>): 3542, 2938, 1781, 1485, 1396, 1327, 1202, 1106, 1006, 941.

MS (EI) *m/z* (%): 344 (100), 146 (95), 276 (56), 275 (55), 274 (53), 277 (46), 169 (28), 259 (20), 261 (18).

The ee value was determined by the chiral HPLC analysis (CHIRALPAK<sup>®</sup> OD-H, Hexane/ Isopropanol = 90/10, v = 1.0 mL/min, λ = 210.0 nm), t (major) = 11.436, t (minor) = 12.699.

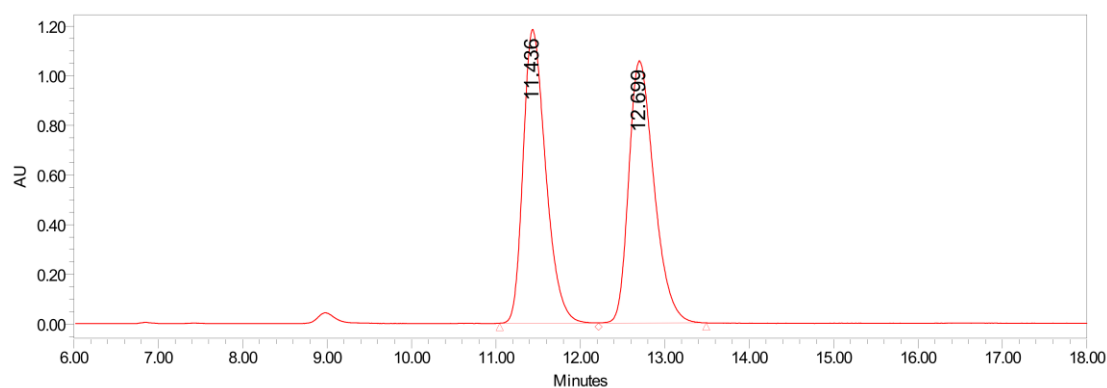

peak information

|   | RetTime (min) | Area (μV*s) | Area (%) | Height (μV) |
|---|---------------|-------------|----------|-------------|
| 1 | 11.436        | 22012537    | 49.93    | 1183177     |
| 2 | 12.699        | 22078440    | 50.07    | 1056870     |

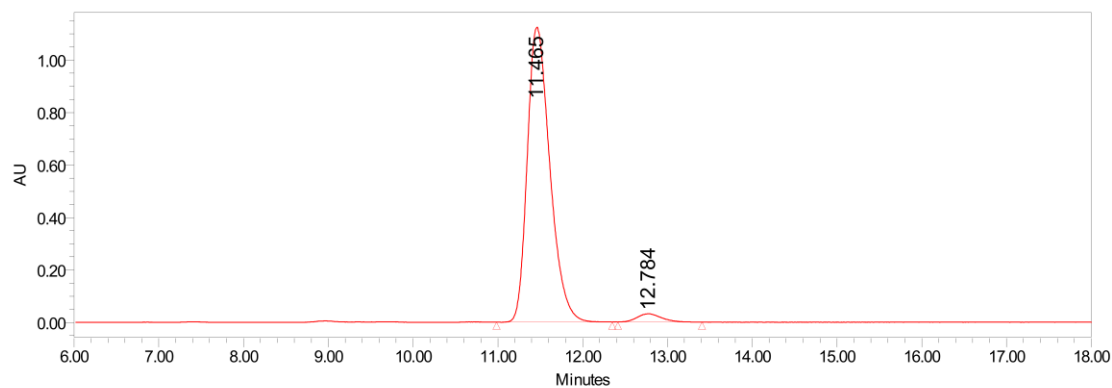

peak information

|   | RetTime (min) | Area ( $\mu\text{V}^{\circ}\text{s}$ ) | Area (%) | Height ( $\mu\text{V}$ ) |
|---|---------------|----------------------------------------|----------|--------------------------|
| 1 | 11.465        | 20847498                               | 97.05    | 1123564                  |
| 2 | 12.784        | 633405                                 | 2.95     | 31811                    |

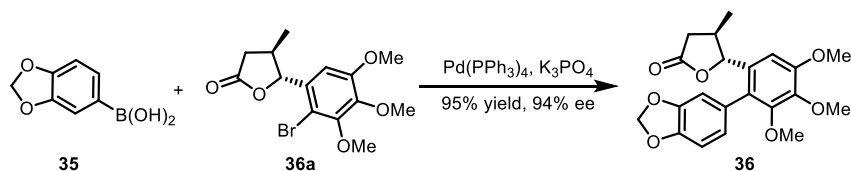

**Compound 36:** To a solution of **36a** (300 mg, 0.87 mmol) in dioxane (0.1 M, 8.7 mL), K<sub>3</sub>PO<sub>4</sub> (922 mg, 4.3 mmol, 5 equiv), 3,4-(methylenedioxy)phenylboronic acid (**35**, 431 mg, 2.6 mmol, 3 equiv) and Pd(PPh<sub>3</sub>)<sub>4</sub> (50 mg, 0.043 mmol) was added. The reaction mixture was degassed with argon gas for 10 min and stirred for 2 h at 100 °C. Then the resulting mixture was filtered through a pad of celite and concentrated and the crude product was purified by column chromatography on silica gel to afford **36** (319 mg, 95% yield as a mixture of atropdiastereomers) as a colorless liquid, 94.4% ee.

$[\alpha]_{\text{D}}^{27} = -58.0$  (c = 1.0, CHCl<sub>3</sub>).

**<sup>1</sup>H NMR** (400 MHz, CDCl<sub>3</sub>)  $\delta$  6.91-6.88 (m, 1H), 6.88-6.84 (m, 1H), 6.74 (d, *J* = 1.6 Hz, 1H), 6.73-6.68 (m, 4H), 6.64 (dd, *J* = 8.0, 1.6 Hz, 1H), 6.07-5.97 (m, 4H), 4.98 (d, *J* = 7.6 Hz, 1H), 4.93 (d, *J* = 7.4 Hz, 1H), 3.91 (s, 6H), 3.90 (s, 6H), 3.64 (s, 3H), 3.64 (s, 3H), 2.74 (dd, *J* = 8.0, 4.8 Hz, 1H), 2.70 (dd, *J* = 8.0, 4.8 Hz, 1H), 2.56-2.40 (m, 2H), 2.18 (dd, *J* = 9.4, 2.6 Hz, 1H), 2.14 (dd, *J* = 9.4, 2.6 Hz, 1H), 0.88 (d, *J* = 5.6 Hz, 3H), 0.86 (d, *J* = 5.6 Hz, 3H).

**<sup>13</sup>C NMR** (100 MHz, CDCl<sub>3</sub>)  $\delta$  176.4, 176.4, 153.2, 153.2, 151.4, 151.3, 147.5, 147.4, 146.9, 146.8, 142.3, 142.3, 131.7, 131.6, 128.8, 128.8, 128.8, 124.1, 123.1, 111.2, 110.3, 108.2, 107.9, 104.4, 101.1, 101.1, 84.7, 84.7, 61.1, 61.0, 60.8, 56.1, 39.2, 39.2, 36.9, 36.8, 16.78.

**HRMS** (ESI) calculated for C<sub>21</sub>H<sub>22</sub>NaO<sub>7</sub> [M+Na<sup>+</sup>]: 409.1258, found: 409.1257.

**FT-IR** (cm<sup>-1</sup>): 3487, 2965, 1777, 1483, 1324, 1224, 1127, 1002, 754.

**MS** (EI) *m/z* (%): 386 (100), 299 (60), 327 (15), 249 (13), 316 (12).

The ee value was determined by the chiral HPLC analysis (CHIRALPAK<sup>®</sup> OD-H, Hexane/ Isopropanol = 80/20, *v* = 1.0 mL/min,  $\lambda$  = 207.0 nm), *t* (major) = 8.971, *t* (minor) = 12.384



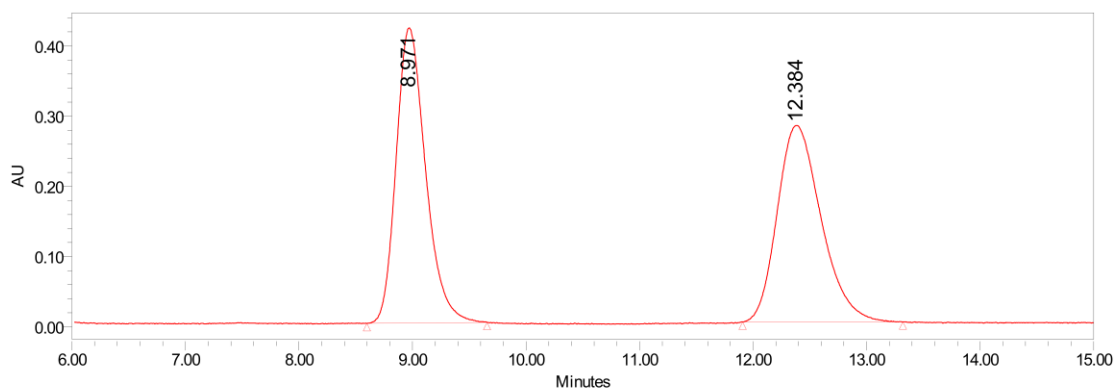

peak information

|   | RetTime (min) | Area ( $\mu\text{V}^{\circ}\text{s}$ ) | Area (%) | Height ( $\mu\text{V}$ ) |
|---|---------------|----------------------------------------|----------|--------------------------|
| 1 | 8.971         | 7584074                                | 50.25    | 420598                   |
| 2 | 12.384        | 7509456                                | 49.75    | 279845                   |

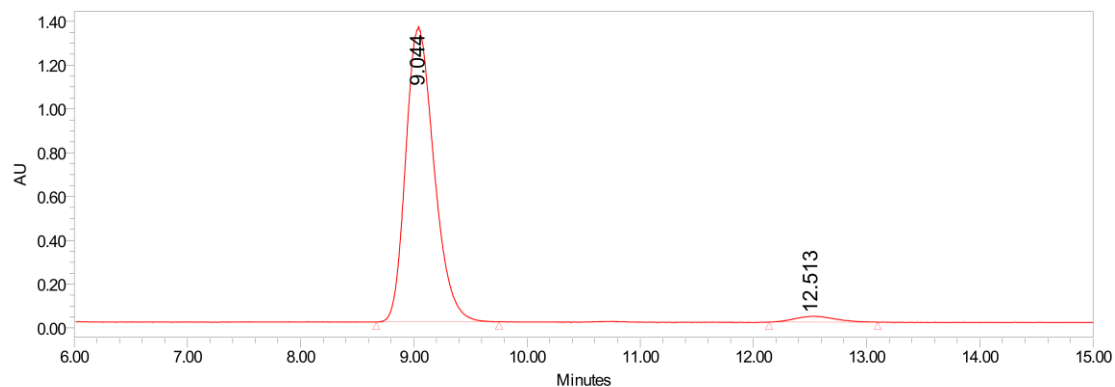

peak information

|   | RetTime (min) | Area ( $\mu\text{V}^{\circ}\text{s}$ ) | Area (%) | Height ( $\mu\text{V}$ ) |
|---|---------------|----------------------------------------|----------|--------------------------|
| 1 | 9.044         | 23421479                               | 97.21    | 1350041                  |
| 2 | 12.513        | 672050                                 | 2.79     | 26776                    |

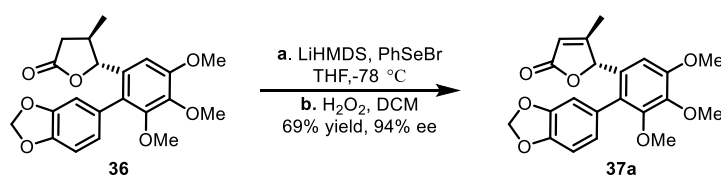

**Compound 37a:** Compound **36** (300 mg, 0.78 mmol) was dissolved in dry THF under argon atmosphere at room temperature and then cooled down to  $-78\text{ }^{\circ}\text{C}$ . Lithium bis(trimethylsilyl)amide (1.0 M in THF, 1.55 mL 2 equiv) was added dropwise via a syringe. The resulted solution was stirred at  $-78\text{ }^{\circ}\text{C}$  for one hour. Then PhSeBr (275 mg, 1.16 mmol, 1.5 equiv) was added, and the mixture was stirred at  $-78\text{ }^{\circ}\text{C}$ . The reaction mixture was quenched with saturated  $\text{NH}_4\text{Cl}$  aqueous solution after full conversion monitored by TLC, and the extracted with DCM. The combined organic layers were washed again with brine, dried ( $\text{NaSO}_4$ ) and concentrated. The residue was dissolved in DCM and cooled to  $0\text{ }^{\circ}\text{C}$ . 30%  $\text{H}_2\text{O}_2$  solution (775  $\mu\text{L}$ , 10 equiv) was added dropwise and stirred for 1 h at  $0\text{ }^{\circ}\text{C}$ . After full conversion, water (10 mL) was added, the solution was extracted with DCM. The combined organic layers were washed with brine, dried ( $\text{NaSO}_4$ ), concentrated and the crude product was purified by flash column chromatography on silica gel to afford **37a**<sup>7</sup> (207 mg, 69% yield, as a mixture of

atropdiastereomers) as yellow liquid, 94.5% ee.

$[\alpha]_D^{27} = -66.0$  ( $c = 1.0$ ,  $\text{CHCl}_3$ ).

$^1\text{H NMR}$  (400 MHz,  $\text{CDCl}_3$ )  $\delta$  6.88 (t,  $J = 7.6$  Hz, 2H), 6.85-6.79 (m, 2H), 6.75 (d,  $J = 1.2$  Hz, 1H), 6.69 (dd,  $J = 8.0, 1.6$  Hz, 1H), 6.32 (s, 2H), 6.06-5.99 (m, 4H), 5.91 (s, 2H), 5.70 (s, 2H), 3.92 (d,  $J = 0.8$  Hz, 6H), 3.83 (s, 6H), 3.65 (s, 3H), 3.64 (s, 3H), 1.87 (s, 3H), 1.86 (s, 3H).

$^{13}\text{C NMR}$  (100 MHz,  $\text{CDCl}_3$ )  $\delta$  173.4, 173.3, 168.5, 153.5, 153.5, 151.7, 151.7, 147.7, 147.5, 147.1, 143.1, 130.4, 130.4, 128.5, 128.5, 127.6, 127.6, 123.8, 116.9, 116.8, 110.9, 110.9, 108.3, 108.0, 104.5, 104.4, 101.2, 101.2, 83.2, 83.1, 61.1, 61.1, 60.9, 56.1, 14.3.

**HRMS** (ESI) calculated for  $\text{C}_{21}\text{H}_{21}\text{O}_7$   $[\text{M}+\text{H}^+]$ : 385.1282, found: 385.1280.

**FT-IR** ( $\text{cm}^{-1}$ ): 2937, 1759, 1483, 1237, 1127, 1087, 756.

**MS** (EI)  $m/z$  (%): 384 (100), 385 (25), 135 (27), 115 (25), 335 (23), 307 (20), 152 (20), 285 (10).

The ee value was determined by the chiral HPLC analysis (CHIRALPAK<sup>®</sup> OD-H, Hexane/ Isopropanol = 80/20,  $v = 1.0$  mL/min,  $\lambda = 210.0$  nm),  $t$  (major) = 9.398,  $t$  (minor) = 13.691.

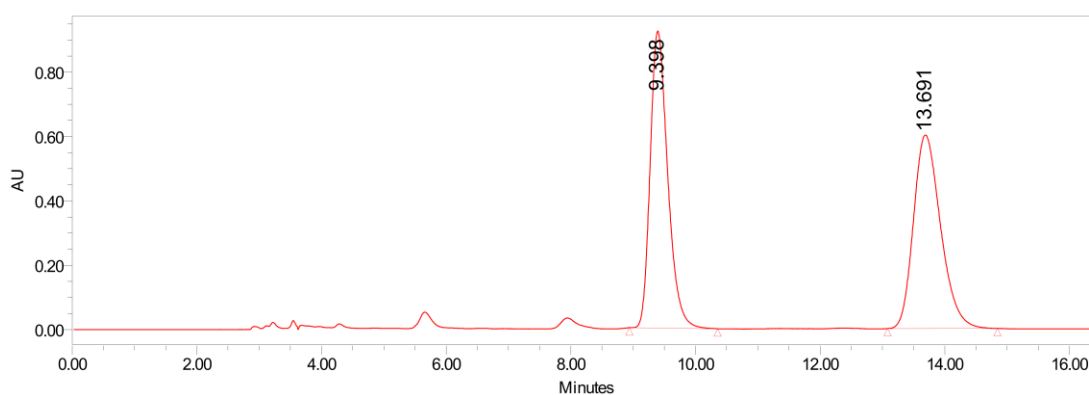

peak information

|   | RetTime (min) | Area ( $\mu\text{V}^2\text{s}$ ) | Area (%) | Height ( $\mu\text{V}$ ) |
|---|---------------|----------------------------------|----------|--------------------------|
| 1 | 9.398         | 18057296                         | 49.81    | 923002                   |
| 2 | 13.691        | 18195800                         | 50.19    | 601653                   |

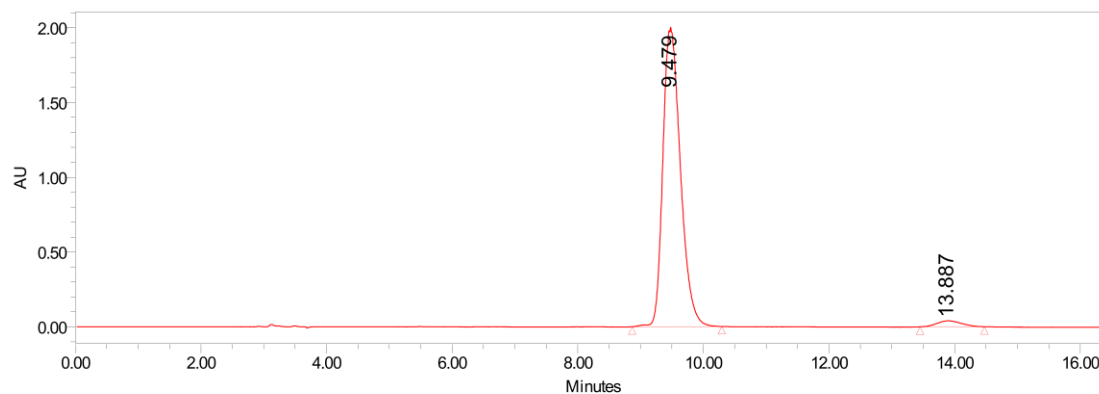

peak information

|   | RetTime (min) | Area ( $\mu\text{V}^2\text{s}$ ) | Area (%) | Height ( $\mu\text{V}$ ) |
|---|---------------|----------------------------------|----------|--------------------------|
| 1 | 9.479         | 38776237                         | 97.27    | 2001450                  |
| 2 | 13.887        | 1088323                          | 2.73     | 39860                    |

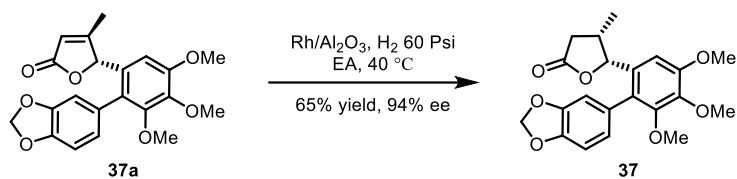

**Compound 37:** Compound **37** was prepared according to the literature.<sup>8</sup> Compound **37a** (82 mg, 0.21 mmol) was dissolved in dry EA at room temperature and Rh/Al<sub>2</sub>O<sub>3</sub> (5%, 10 mg) was added. Then the reaction mixture stirred under H<sub>2</sub> (5 atm) at 40 °C for 24 h before the catalyst was filtered, and the filtrate concentrated to afford a residue, which on purification by column chromatography on silica gel to afford **37** (53.5 mg, 65% yield, as a mixture of atropdiastereomers) as white amorphous solid, 94.4% ee, m. p.: 166.0-167.8 °C

$[\alpha]_D^{27} = +21.0$  (c = 1.0, CHCl<sub>3</sub>)

<sup>1</sup>H NMR (600 MHz, CDCl<sub>3</sub>) δ 6.87 (dd, *J* = 7.8, 6.0 Hz, 2H), 6.81 (d, *J* = 4.8 Hz, 2H), 6.72 (d, *J* = 1.8 Hz, 1H), 6.69 (dd, *J* = 7.8, 1.8 Hz, 1H), 6.62 (d, *J* = 1.8 Hz, 1H), 6.57 (dd, *J* = 7.8, 1.8 Hz, 1H), 6.04 (d, *J* = 1.8 Hz, 2H), 6.02 (dd, *J* = 2.4, 1.2 Hz, 2H), 5.50 (d, *J* = 6.0 Hz, 1H), 5.41 (d, *J* = 5.4 Hz, 1H), 3.91 (s, 12H), 3.65 (s, 3H), 3.65 (s, 3H), 2.70 (dt, *J* = 17.4, 7.8 Hz, 2H), 2.30-2.19 (m, 4H), 0.70 (d, *J* = 7.2 Hz, 3H), 0.67 (d, *J* = 7.2 Hz, 3H).

<sup>13</sup>C NMR (150 MHz, CDCl<sub>3</sub>) δ 176.4, 152.8, 151.5, 147.7, 147.6, 147.0, 146.9, 130.1, 129.1, 126.4, 126.3, 123.4, 122.4, 110.6, 109.6, 108.5, 108.2, 104.7, 104.6, 101.2, 101.2, 82.1, 82.1, 61.2, 61.1, 60.9, 56.2, 37.9, 34.0, 33.7, 15.5, 15.4.

**HRMS** (ESI) calculated for C<sub>21</sub>H<sub>22</sub>NaO<sub>7</sub> [M+Na<sup>+</sup>]: 409.1258, found: 409.1258.

**FT-IR** (cm<sup>-1</sup>): 2968, 2936, 1780, 1482, 1457, 1236, 1162, 1127, 1038, 752.

**MS** (EI) *m/z* (%): 386 (100), 299 (60), 327 (15), 249 (13), 316 (12).

The ee value was determined by the chiral HPLC analysis (CHIRALPAK® OD-H, Hexane/ Isopropanol = 80/20, v = 1.0 mL/min, λ = 207.0 nm), t (minor) = 10.422, t (major) = 12.463.

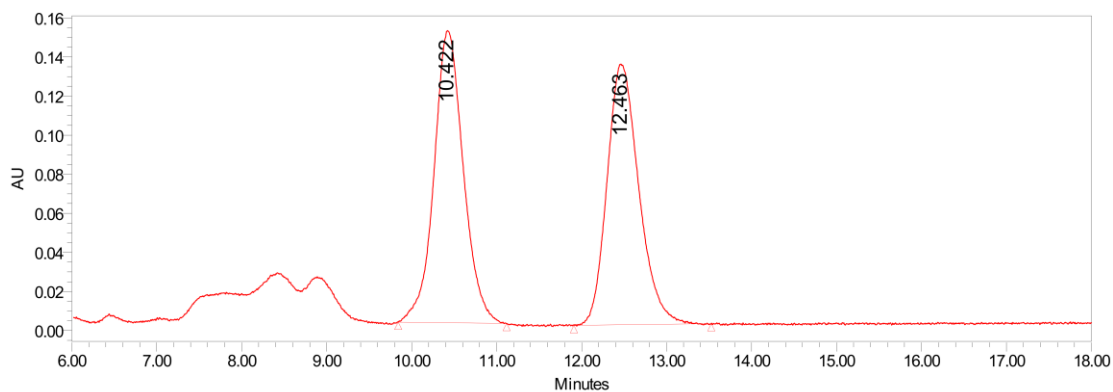

peak information

|   | RetTime (min) | Area (μV*s) | Area (%) | Height (μV) |
|---|---------------|-------------|----------|-------------|
| 1 | 10.422        | 3584151     | 50.77    | 149478      |
| 2 | 12.463        | 3475139     | 49.23    | 133436      |

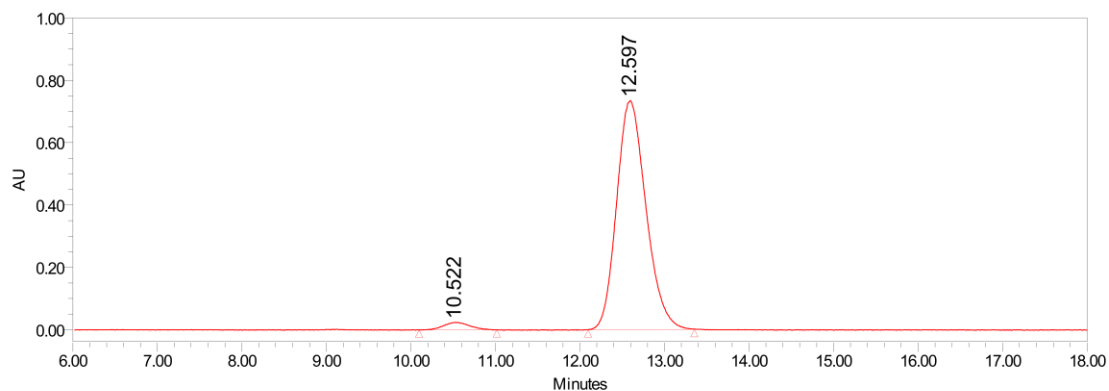

peak information

|   | RetTime (min) | Area ( $\mu\text{V}^2\text{s}$ ) | Area (%) | Height ( $\mu\text{V}$ ) |
|---|---------------|----------------------------------|----------|--------------------------|
| 1 | 10.522        | 513261                           | 2.82     | 24119                    |
| 2 | 12.597        | 17685972                         | 97.18    | 734509                   |

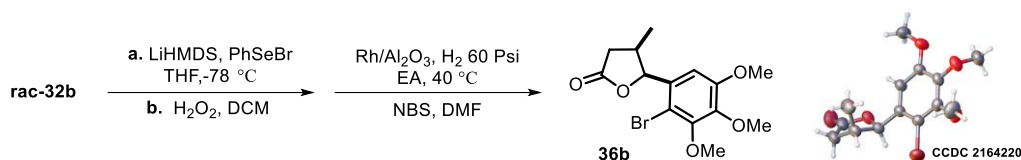

This compound was synthesized according to the procedure above and the relative configuration of **36b** was confirmed by X-ray analysis. The asymmetric product **32b** would be partially racemized after these reactions.

**$^1\text{H}$  NMR** (600 MHz,  $\text{CDCl}_3$ )  $\delta$  6.81 (s, 1H), 5.77 (d,  $J = 6.0$  Hz, 1H), 3.91 (s, 3H), 3.90 (s, 3H), 3.88 (s, 3H), 3.28-3.20 (m, 1H), 2.96 (dd,  $J = 17.4, 7.8$  Hz, 1H), 2.36 (dd,  $J = 17.4, 1.8$  Hz, 1H), 0.68 (d,  $J = 7.2$  Hz, 3H).

**$^{13}\text{C}$  NMR** (150 MHz,  $\text{CDCl}_3$ )  $\delta$  176.2, 152.9, 150.7, 142.5, 131.0, 106.7, 106.0, 83.4, 61.0, 61.0, 56.2, 37.5, 32.5, 15.3.

**HRMS** (ESI) calculated for  $\text{C}_{14}\text{H}_{17}\text{BrNaO}_5$  [ $\text{M}+\text{Na}^+$ ]: 367.0152, 369.0131, found: 367.0154, 369.0131.

**FT-IR** ( $\text{cm}^{-1}$ ): 3543, 2937, 1779, 1487, 1398, 1327, 1202, 1106, 1006, 940.

**MS** (EI)  $m/z$  (%): 344 (100), 146 (95), 276 (56), 275 (55), 274 (53), 277 (46), 169 (28), 259 (20), 261 (18).

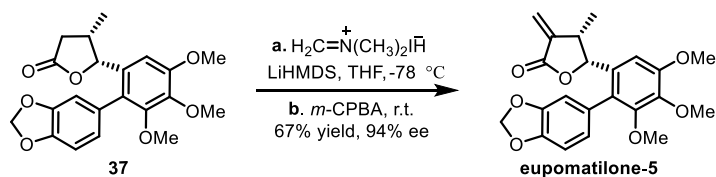

**eupomatilone-5**: Compound **38** was prepared according to the literature.<sup>9</sup> To a solution of **37** (20 mg, 0.052 mmol) in dry THF (0.02 M, 2.6 mL) under argon atmosphere at  $-78$   $^\circ\text{C}$ , Lithium bis(trimethylsilyl)amide (1.0 M in THF, 105  $\mu\text{L}$ , 2.0 equiv) was added. Eschenmoser's Salt (28.7 mg, 0.155 mmol, 3.0 equiv) was added after the reaction mixture was stirred for 1 h at  $-78$   $^\circ\text{C}$ . The resulting mixture was stirred for 1 h at  $-78$   $^\circ\text{C}$  before it was quenched with the addition of saturated aqueous  $\text{NaHCO}_3$  and diluted with DCM. The solution was extracted with DCM. The combined organic layers were washed with brine, dried ( $\text{Na}_2\text{SO}_4$ ), concentrated in vacuo. The residue was dissolved in DCM (0.01 M, 5.2 mL), saturated aqueous  $\text{NaHCO}_3$  (0.02 M, 2.6 mL) and 85% *m*-CPBA (21.0 mg, 0.10

mmol, 2.0 equiv) was added at room temperature. The reaction mixture was stirred for 10 min before it was diluted with saturated aqueous NaHCO<sub>3</sub>. The organic layers were separated, and the aqueous layer was extracted with DCM. The combined organic layers were washed again with saturated aqueous NaHCO<sub>3</sub> and brine, dried (NaSO<sub>4</sub>) and concentrated to afford a residue, which on purification by column chromatography on silica gel to afford **eupomatilone-5** (13.8 mg, 67% yield, as a mixture of atropdiastereomers) as a colorless liquid, 94.1% ee.

$[\alpha]_D^{21} = +31.0$  (c = 1.0, CHCl<sub>3</sub>).

<sup>1</sup>H NMR (600 MHz, CDCl<sub>3</sub>) δ 6.87 (dd, *J* = 7.8, 1.2 Hz, 2H), 6.73 (d, *J* = 1.2 Hz, 1H), 6.70 (dd, *J* = 7.8, 1.8 Hz, 1H), 6.69 (s, 2H), 6.64 (d, *J* = 1.8 Hz, 1H), 6.59 (dd, *J* = 7.8, 1.8 Hz, 1H), 6.24 (d, *J* = 1.8 Hz, 2H), 6.07-5.99 (m, 4H), 5.58-5.49 (m, 3H), 5.44 (d, *J* = 7.2 Hz, 1H), 3.91 (s, 6H), 3.88 (s, 6H), 3.65 (s, 3H), 3.64 (s, 3H), 2.91-2.82 (m, 2H), 0.82 (d, *J* = 7.3 Hz, 3H), 0.80 (d, *J* = 7.8 Hz, 3H).

<sup>13</sup>C NMR (150 MHz, CDCl<sub>3</sub>) δ 170.2, 170.1, 152.9, 151.5, 147.7, 147.7, 147.1, 147.0, 141.8, 141.2, 141.1, 130.1, 130.1, 129.0, 127.1, 123.3, 122.7, 122.0, 110.6, 109.9, 108.5, 108.2, 104.8, 104.8, 101.2, 101.2, 79.4, 79.3, 61.2, 61.1, 60.9, 56.1, 38.4, 38.2, 17.3, 17.1.

HRMS (ESI) calculated for C<sub>22</sub>H<sub>22</sub>NaO<sub>7</sub> [M+Na<sup>+</sup>]: 421.1258, found: 421.1259

FT-IR (cm<sup>-1</sup>): 2935, 1767, 1483, 1458, 1324, 1236, 1128, 1037, 970.

MS (EI) *m/z* (%): 299 (100), 398 (85), 284 (25), 300 (22), 399 (22).

The ee value was determined by the chiral HPLC analysis (CHIRALPAK® IC-3, Hexane/ Isopropanol = 80/20, v = 1.0 mL/min, λ = 208.0 nm), t (major) = 14.616, t (minor) = 17.428.

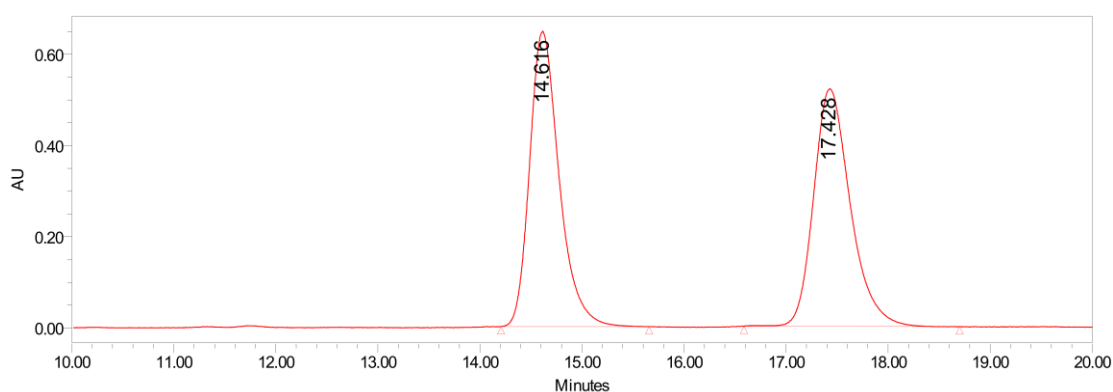

peak information

|   | RetTime (min) | Area (μV*s) | Area (%) | Height (μV) |
|---|---------------|-------------|----------|-------------|
| 1 | 14.616        | 13027170    | 49.95    | 648154      |
| 2 | 17.428        | 13053013    | 50.05    | 521837      |

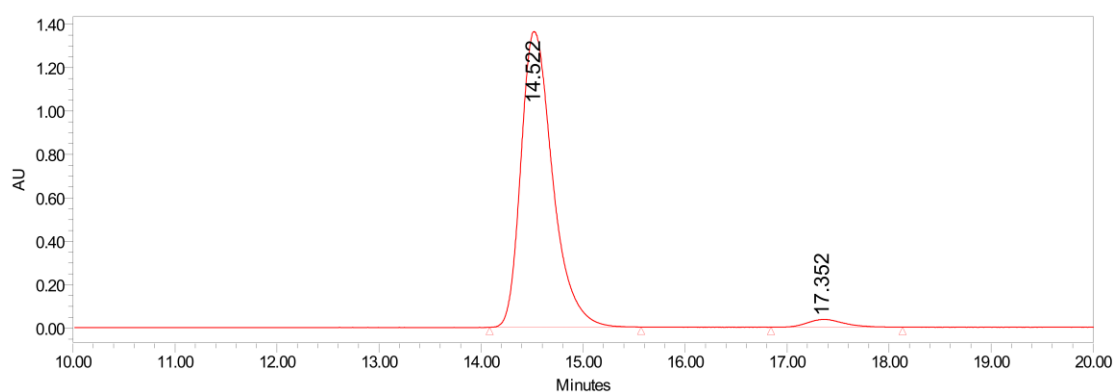

peak information

|   | RetTime (min) | Area ( $\mu\text{V}^2\text{s}$ ) | Area (%) | Height ( $\mu\text{V}$ ) |
|---|---------------|----------------------------------|----------|--------------------------|
| 1 | 14.522        | 29444388                         | 97.05    | 1362231                  |
| 2 | 17.352        | 896372                           | 2.95     | 35906                    |

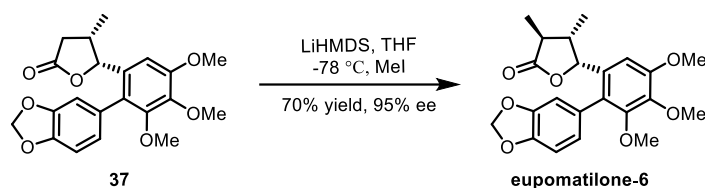

**eupomatilone-6:** Compound **39** was prepared according to the literature.<sup>9c</sup> To a solution of **37** (20 mg, 0.052 mmol) in dry THF (0.05 M, 1.0 mL) under argon atmosphere at  $-78\text{ }^\circ\text{C}$ , Lithium bis(trimethylsilyl)amide (1.0 M in THF, 105  $\mu\text{L}$ , 2.0 equiv) was added. MeI (4.8  $\mu\text{L}$ , 0.078 mmol, 1.5 equiv) was added after the reaction mixture was stirred for 1 h at  $-78\text{ }^\circ\text{C}$ . The resulting mixture was stirred for 1 h at  $-78\text{ }^\circ\text{C}$  before it was quenched with the addition of saturated aqueous  $\text{NH}_4\text{Cl}$  and diluted with EA. The solution was extracted with DCM. The combined organic layers were washed with brine, dried ( $\text{NaSO}_4$ ), concentrated in vacuo. The crude product was purified by flash column chromatography on silica gel to afford **eupomatilone-6** (14.5 mg, 70% yield, as a mixture of atropdiastereomers) as a colorless liquid, 94.8% ee.

$[\alpha]_D^{21} = -23.0$  ( $c = 1.0$ ,  $\text{CHCl}_3$ ).

**$^1\text{H NMR}$**  (600 MHz,  $\text{CDCl}_3$ )  $\delta$  6.88 (d,  $J = 5.4$  Hz, 1H), 6.86 (d,  $J = 4.8$  Hz, 1H), 6.73 (d,  $J = 1.8$  Hz, 1H), 6.70 (dd,  $J = 8.1, 1.5$  Hz, 1H), 6.67 (d,  $J = 4.2$  Hz, 2H), 6.65 (d,  $J = 1.8$  Hz, 1H), 6.59 (dd,  $J = 7.8, 1.8$  Hz, 1H), 6.03 (dd,  $J = 3.6, 1.2$  Hz, 2H), 6.02 (dd,  $J = 4.2, 1.8$  Hz, 2H), 5.64 (d,  $J = 7.2$  Hz, 1H), 5.53 (d,  $J = 7.2$  Hz, 1H), 3.90 (s, 6H), 3.89 (s, 6H), 3.64 (s, 3H), 3.63 (s, 3H), 2.40-2.32 (m, 2H), 2.06-1.93 (m, 2H), 1.20 (d,  $J = 6.6$  Hz, 3H), 1.19 (d,  $J = 6.6$  Hz, 3H), 0.72 (d,  $J = 7.2$  Hz, 3H), 0.69 (d,  $J = 7.2$  Hz, 3H).

**$^{13}\text{C NMR}$**  (150 MHz,  $\text{CDCl}_3$ )  $\delta$  179.7, 152.9, 151.6, 147.7, 147.6, 146.9, 146.9, 141.8, 141.8, 130.3, 130.3, 129.1, 129.0, 127.2, 127.1, 123.8, 122.7, 111.0, 109.9, 108.4, 108.1, 104.7, 104.7, 101.2, 101.1, 79.9, 79.8, 61.2, 61.1, 60.9, 56.2, 42.7, 42.5, 41.5, 41.2, 15.5, 15.3, 15.0, 14.8.

**HRMS** (ESI) calculated for  $\text{C}_{22}\text{H}_{24}\text{NaO}_7$  [ $\text{M}+\text{Na}^+$ ]: 423.1414, found: 423.1415.

**FT-IR** ( $\text{cm}^{-1}$ ): 2968, 2935, 1774, 1483, 1457, 1325, 1236, 1197, 1128, 1038, 1005, 937.

**MS** (EI)  $m/z$  (%): 400 (100), 316 (30), 299 (25), 401 (25), 341 (20), 243 (10).

The ee value was determined by the chiral HPLC analysis (CHIRALPAK<sup>®</sup> IC-3, Hexane/ Isopropanol = 80/20,  $v = 1.0$  mL/min,  $\lambda = 208.0$  nm),  $t$  (major) = 12.787,  $t$  (minor) = 16.696.

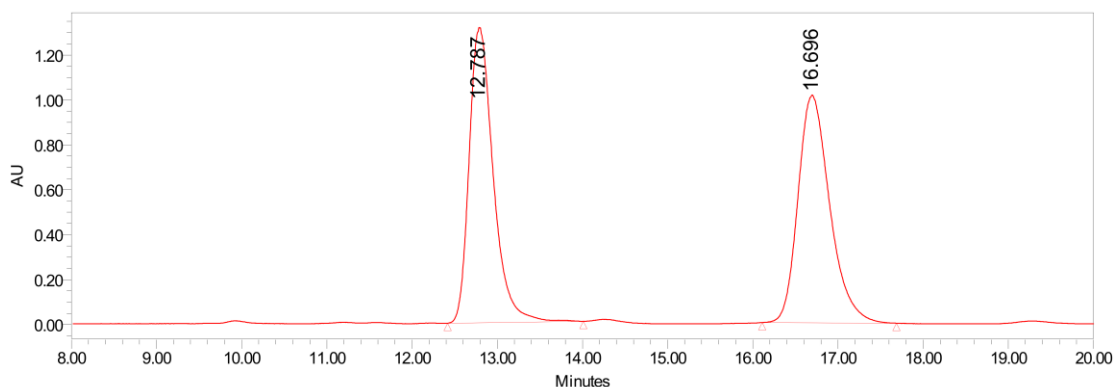

peak information

|   | RetTime (min) | Area ( $\mu\text{V}^2\text{s}$ ) | Area (%) | Height ( $\mu\text{V}$ ) |
|---|---------------|----------------------------------|----------|--------------------------|
| 1 | 12.787        | 25892953                         | 49.65    | 1314846                  |
| 2 | 16.696        | 26260845                         | 50.35    | 1014760                  |

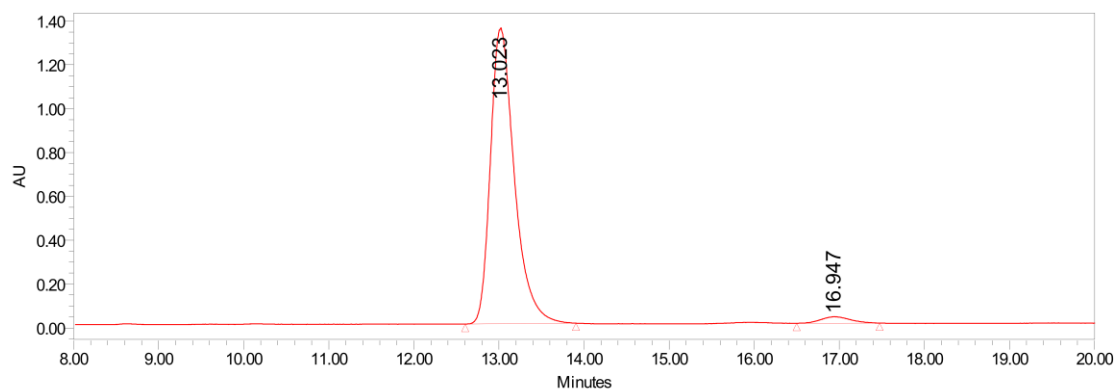

peak information

|   | RetTime (min) | Area ( $\mu\text{V}^2\text{s}$ ) | Area (%) | Height ( $\mu\text{V}$ ) |
|---|---------------|----------------------------------|----------|--------------------------|
| 1 | 13.023        | 26381381                         | 97.43    | 1349896                  |
| 2 | 16.947        | 695256                           | 2.57     | 29148                    |

## 11. A possible mechanism for Cu/SPDO catalyzed Baeyer–Villiger oxidation

Based on the reported B–V oxidation reaction in literature and the absolute configuration of four products (**6b**, **16b**, **21b**, and **28b**; CCDC Nos. 2169290, 2169293, 2164219, and 2164218, respectively), a preliminary model of classical kinetic resolution of 2-aryl-substituted cyclobutanones through B–V oxidation catalysed using a Cu(II)/SPDO system is proposed (Scheme R1). Initially, 2-aryl cyclobutanone could be activated by chiral Cu-SPDO complex and then reacted with 3-chloroperoxybenzoic acid, and two possible Criegee intermediates **A** and **A'** were proposed. For the intermediate **A** derived from enantiomer (**S**)-**1a**, due to the  $\pi$ - $\pi$  stacking interactions between the substrate and the SPDO ligand, the leaving group of peroxide acid in this transition state is oriented antiperiplanar to the adjacent migrating group, which accelerated the subsequent alkyl migration (Scheme R1a). Hence this favoured intermediate **A'** easily generated lactone **b** and by-product 3-chlorobenzoic acid through a rearrangement procedure and simultaneously released the chiral Cu-catalyst for the next catalytic cycle. However, for the latter, because of the lack of possible  $\pi$ - $\pi$  stacking interactions between the chiral catalyst and enantiomer (**R**)-**1a** and suitable orientation between the leaving group and migrating group in the expected rearrangement reaction, this unfavoured intermediate **A'** remained unreacted under the optimal reaction conditions, and then released the ketone (**R**)-**1a** in a high enantioselective fashion after quenching with  $\text{Na}_2\text{SO}_3$  solution (Scheme S1).

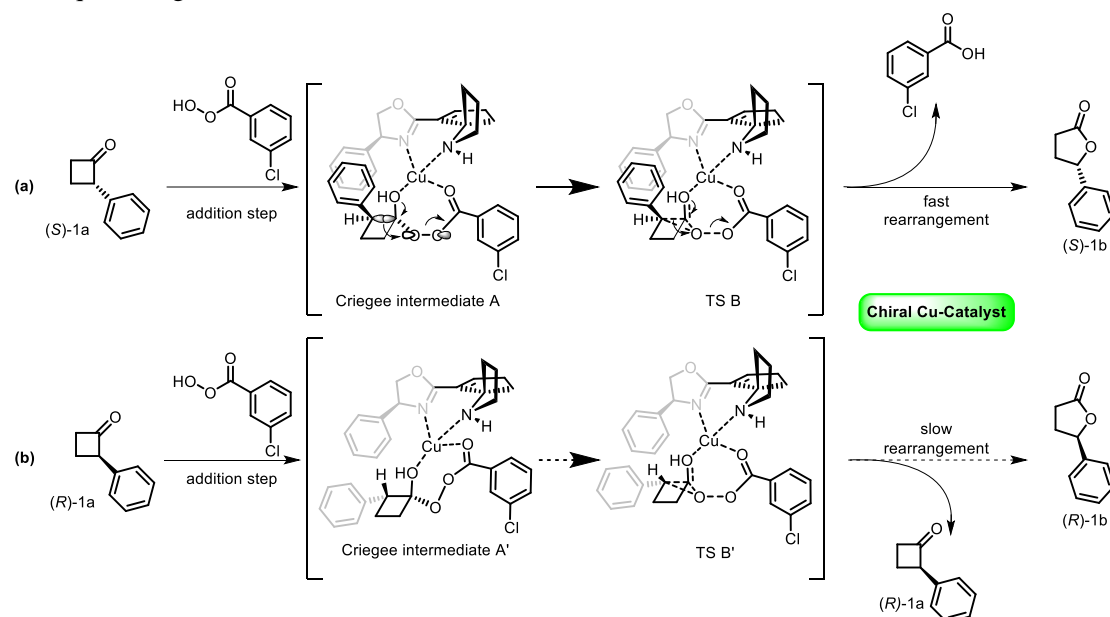

**Scheme S1.** A possible mechanism for Cu/SPDO catalyzed Baeyer–Villiger oxidation



## 12. References

- [1] (a) J.-M. Tian, A.-F. Wang, J.-S. Yang, X.-J. Zhao, Y.-Q. Tu, S.-Y. Zhang and Z.-M. Chen, *Angew. Chem., Int. Ed.*, 2019, **58**, 11023; (b) X.-J. Zhao, Z.-H. Li, T.-M. Ding, J.-M. Tian, Y.-Q. Tu, A.-F. Wang and Y.-Y. Xie, *Angew. Chem., Int. Ed.*, 2021, **60**, 7061.
- [2] Y. Wang, M. E. Muratore, Z. Rong and A. M. Echavarren, *Angew. Chem., Int. Ed.*, 2014, **53**, 14022.
- [3] X. Zhao, M. Tian, L. Ji, J. Liu and K. Lu, *Org. Lett.*, 2020, **22**, 863.
- [4] C. Battilocchio, G. Iannucci, S. Wang, E. Godineau, A. Kolleth, A. D. Mesmaeker and S. V. Ley, *React. Chem. Eng.*, 2017, **2**, 295.
- [5] C. Aïssa, D. Crépin, D. J. Tetlow and K. Y. T. Ho, *Org. Lett.*, 2013, **15**, 1322.
- [6] M. M. Hussain, H. Li, N. Hussain, M. Ureña, P. J. Carroll and P. J. Walsh, *J. Am. Chem. Soc.*, 2009, **131**, 6516.
- [7] L. Guillaume, F. Josep, P. Teodor, A. Ramon and F. Marta, *J. Org. Chem.*, 2015, **80**, 9437.
- [8] M. K. Gurjar, J. Cherian and C. V. Ramana, *Org. Lett.*, 2004, **6**, 317.
- [9] (a) T. S. Kaoud, H. Park, S. Mitra, C. Yan, C.-C. Tseng, Y. Shi, J. Jose, J. M. Taliaferro, K. Lee, P. Ren, J. Hong and K. N. Dalby, *ACS Chem. Biol.*, 2012, **7**, 1873. (b) J. Schreiber, H. Maag, N. Hashimoto and A. Eschenmoser, *Angew. Chem., Int. Ed.*, 1971, **10**, 330. (c) M. Mandal, H. Yun, G. B. Dudley, S. Lin, D. S. Tan and S. J. Danishefsky, *J. Org. Chem.*, 2005, **70**, 10619.

### 13. X-ray Crystallographic Data

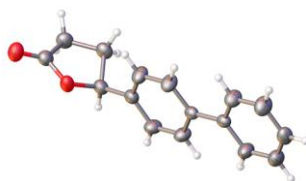

CCDC 2169290

**Table S7. Crystal data and structure refinement for 6b (CCDC 2169290)**

|                                             |                                                          |
|---------------------------------------------|----------------------------------------------------------|
| Identification code                         | <b>6b</b>                                                |
| Empirical formula                           | C <sub>16</sub> H <sub>14</sub> O <sub>2</sub>           |
| Formula weight                              | 238.27                                                   |
| Temperature/K                               | 149.99(10)                                               |
| Crystal system                              | orthorhombic                                             |
| Space group                                 | P212121                                                  |
| a/Å                                         | 5.2470(2)                                                |
| b/Å                                         | 8.2089(2)                                                |
| c/Å                                         | 28.1307(9)                                               |
| α/°                                         | 90                                                       |
| β/°                                         | 90                                                       |
| γ/°                                         | 90                                                       |
| Volume/Å <sup>3</sup>                       | 1211.65(7)                                               |
| Z                                           | 4                                                        |
| ρ <sub>calc</sub> /cm <sup>3</sup>          | 1.306                                                    |
| μ/mm <sup>-1</sup>                          | 0.679                                                    |
| F(000)                                      | 504.0                                                    |
| Crystal size/mm <sup>3</sup>                | 0.18 × 0.15 × 0.12                                       |
| Radiation                                   | Cu Kα (λ = 1.54184)                                      |
| 2θ range for data collection/°              | 6.284 to 154.806                                         |
| Index ranges                                | -6 ≤ h ≤ 6, -10 ≤ k ≤ 10, -30 ≤ l ≤ 34                   |
| Reflections collected                       | 2834                                                     |
| Independent reflections                     | 2834 [R <sub>int</sub> = ?, R <sub>sigma</sub> = 0.0166] |
| Data/restraints/parameters                  | 2834/0/164                                               |
| Goodness-of-fit on F <sup>2</sup>           | 1.112                                                    |
| Final R indexes [I >= 2σ (I)]               | R <sub>1</sub> = 0.0687, wR <sub>2</sub> = 0.1927        |
| Final R indexes [all data]                  | R <sub>1</sub> = 0.0727, wR <sub>2</sub> = 0.1994        |
| Largest diff. peak/hole / e Å <sup>-3</sup> | 0.32/-0.37                                               |
| Flack parameter                             | -0.3(3)                                                  |

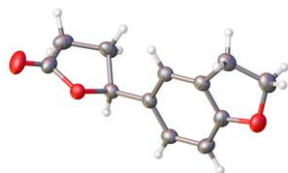

CCDC 2169293

**Table S7. Crystal data and structure refinement for 16b (CCDC 2169293)**

|                                             |                                                               |
|---------------------------------------------|---------------------------------------------------------------|
| Identification code                         | <b>16b</b>                                                    |
| Empirical formula                           | C <sub>12</sub> H <sub>12</sub> O <sub>3</sub>                |
| Formula weight                              | 204.22                                                        |
| Temperature/K                               | 150.00(10)                                                    |
| Crystal system                              | orthorhombic                                                  |
| Space group                                 | P212121                                                       |
| a/Å                                         | 8.7960(2)                                                     |
| b/Å                                         | 10.4133(2)                                                    |
| c/Å                                         | 10.7857(2)                                                    |
| α/°                                         | 90                                                            |
| β/°                                         | 90                                                            |
| γ/°                                         | 90                                                            |
| Volume/Å <sup>3</sup>                       | 987.92(3)                                                     |
| Z                                           | 4                                                             |
| ρ <sub>calc</sub> /cm <sup>3</sup>          | 1.373                                                         |
| μ/mm <sup>-1</sup>                          | 0.809                                                         |
| F(000)                                      | 432.0                                                         |
| Crystal size/mm <sup>3</sup>                | 0.17 × 0.14 × 0.12                                            |
| Radiation                                   | Cu Kα (λ = 1.54184)                                           |
| 2θ range for data collection/°              | 11.814 to 154.708                                             |
| Index ranges                                | -5 ≤ h ≤ 10, -13 ≤ k ≤ 12, -12 ≤ l ≤ 13                       |
| Reflections collected                       | 3439                                                          |
| Independent reflections                     | 1765 [R <sub>int</sub> = 0.0201, R <sub>sigma</sub> = 0.0231] |
| Data/restraints/parameters                  | 1765/0/136                                                    |
| Goodness-of-fit on F <sup>2</sup>           | 0.877                                                         |
| Final R indexes [I ≥ 2σ (I)]                | R <sub>1</sub> = 0.0298, wR <sub>2</sub> = 0.0924             |
| Final R indexes [all data]                  | R <sub>1</sub> = 0.0307, wR <sub>2</sub> = 0.0941             |
| Largest diff. peak/hole / e Å <sup>-3</sup> | 0.18/-0.13                                                    |
| Flack parameter                             | -0.06(9)                                                      |

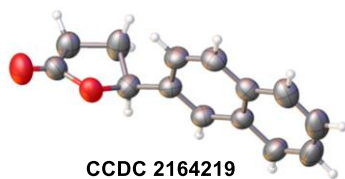

**Table S5. Crystal data and structure refinement for 21b (CCDC 2164219)**

|                                             |                                                               |
|---------------------------------------------|---------------------------------------------------------------|
| Identification code                         | <b>21b</b>                                                    |
| Empirical formula                           | C <sub>14</sub> H <sub>12</sub> O <sub>2</sub>                |
| Formula weight                              | 212.24                                                        |
| Temperature/K                               | 298.23(10)                                                    |
| Crystal system                              | orthorhombic                                                  |
| Space group                                 | P2 <sub>1</sub> 2 <sub>1</sub> 2 <sub>1</sub>                 |
| a/Å                                         | 8.67930(10)                                                   |
| b/Å                                         | 22.7043(3)                                                    |
| c/Å                                         | 11.04130(10)                                                  |
| α/°                                         | 90                                                            |
| β/°                                         | 90                                                            |
| γ/°                                         | 90                                                            |
| Volume/Å <sup>3</sup>                       | 2175.77(4)                                                    |
| Z                                           | 4                                                             |
| ρ <sub>calc</sub> /cm <sup>3</sup>          | 1.296                                                         |
| μ/mm <sup>-1</sup>                          | 0.689                                                         |
| F (000)                                     | 896.0                                                         |
| Crystal size/mm <sup>3</sup>                | 0.18 × 0.15 × 0.12                                            |
| Radiation                                   | Cu Kα (λ = 1.54184)                                           |
| 2θ range for data collection/°              | 8.906 to 151.824                                              |
| Index ranges                                | -10 ≤ h ≤ 5, -28 ≤ k ≤ 28, -13 ≤ l ≤ 13                       |
| Reflections collected                       | 11192                                                         |
| Independent reflections                     | 4292 [R <sub>int</sub> = 0.0235, R <sub>sigma</sub> = 0.0235] |
| Data/restraints/parameters                  | 4292/0/289                                                    |
| Goodness-of-fit on F <sup>2</sup>           | 1.067                                                         |
| Final R indexes [I ≥ 2σ (I)]                | R1 = 0.0368, wR2 = 0.1012                                     |
| Final R indexes [all data]                  | R1 = 0.0393, wR2 = 0.1027                                     |
| Largest diff. peak/hole / e Å <sup>-3</sup> | 0.13/-0.14                                                    |
| Flack parameter                             | 0.10(9)                                                       |

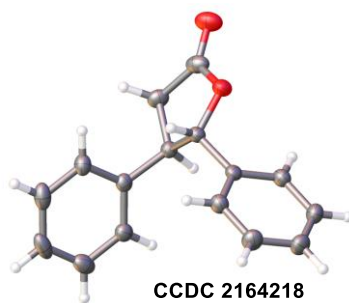

**Table S6. Crystal data and structure refinement for 28b (CCDC 2164218)**

|                                             |                                                               |
|---------------------------------------------|---------------------------------------------------------------|
| Identification code                         | <b>28b</b>                                                    |
| Empirical formula                           | C <sub>16</sub> H <sub>14</sub> O <sub>2</sub>                |
| Formula weight                              | 238.27                                                        |
| Temperature/K                               | 150.01(10)                                                    |
| Crystal system                              | orthorhombic                                                  |
| Space group                                 | P2 <sub>1</sub> 2 <sub>1</sub> 2 <sub>1</sub>                 |
| a/Å                                         | 5.91070(10)                                                   |
| b/Å                                         | 13.8035(3)                                                    |
| c/Å                                         | 15.3174(3)                                                    |
| α/°                                         | 90                                                            |
| β/°                                         | 90                                                            |
| γ/°                                         | 90                                                            |
| Volume/Å <sup>3</sup>                       | 1249.72(4)                                                    |
| Z                                           | 4                                                             |
| ρ <sub>calc</sub> /cm <sup>3</sup>          | 1.266                                                         |
| μ/mm <sup>-1</sup>                          | 0.658                                                         |
| F(000)                                      | 504.0                                                         |
| Crystal size/mm <sup>3</sup>                | 0.15 × 0.12 × 0.04                                            |
| Radiation                                   | Cu Kα (λ = 1.54184)                                           |
| 2θ range for data collection/°              | 8.624 to 154.91                                               |
| Index ranges                                | -7 ≤ h ≤ 7, -16 ≤ k ≤ 17, -18 ≤ l ≤ 14                        |
| Reflections collected                       | 6468                                                          |
| Independent reflections                     | 2485 [R <sub>int</sub> = 0.0289, R <sub>sigma</sub> = 0.0260] |
| Data/restraints/parameters                  | 2485/0/163                                                    |
| Goodness-of-fit on F <sup>2</sup>           | 1.065                                                         |
| Final R indexes [I ≥ 2σ (I)]                | R <sub>1</sub> = 0.0468, wR <sub>2</sub> = 0.1244             |
| Final R indexes [all data]                  | R <sub>1</sub> = 0.0481, wR <sub>2</sub> = 0.1256             |
| Largest diff. peak/hole / e Å <sup>-3</sup> | 0.66/-0.26                                                    |
| Flack parameter                             | -0.19(15)                                                     |

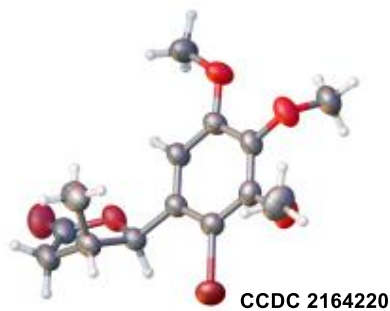

**Table S7. Crystal data and structure refinement for 36b (CCDC 2164220)**

|                                             |                                                               |
|---------------------------------------------|---------------------------------------------------------------|
| Identification code                         | <b>36b</b>                                                    |
| Empirical formula                           | C <sub>14</sub> H <sub>17</sub> BrO <sub>5</sub>              |
| Formula weight                              | 345.18                                                        |
| Temperature/K                               | 303.15(10)                                                    |
| Crystal system                              | triclinic                                                     |
| Space group                                 | P-1                                                           |
| a/Å                                         | 7.8803(2)                                                     |
| b/Å                                         | 9.7157(2)                                                     |
| c/Å                                         | 10.6212(2)                                                    |
| α/°                                         | 94.2410(10)                                                   |
| β/°                                         | 94.434(2)                                                     |
| γ/°                                         | 111.794(2)                                                    |
| Volume/Å <sup>3</sup>                       | 748.16(3)                                                     |
| Z                                           | 2                                                             |
| ρ <sub>calc</sub> /cm <sup>3</sup>          | 1.532                                                         |
| μ/mm <sup>-1</sup>                          | 3.900                                                         |
| F(000)                                      | 352.0                                                         |
| Crystal size/mm <sup>3</sup>                | 0.13 × 0.11 × 0.09                                            |
| Radiation                                   | Cu Kα (λ = 1.54184)                                           |
| 2θ range for data collection/°              | 8.402 to 152.902                                              |
| Index ranges                                | -9 ≤ h ≤ 9, -12 ≤ k ≤ 12, -12 ≤ l ≤ 13                        |
| Reflections collected                       | 8578                                                          |
| Independent reflections                     | 2995 [R <sub>int</sub> = 0.0248, R <sub>sigma</sub> = 0.0229] |
| Data/restraints/parameters                  | 2995/0/185                                                    |
| Goodness-of-fit on F <sup>2</sup>           | 1.068                                                         |
| Final R indexes [I ≥ 2σ (I)]                | R <sub>1</sub> = 0.0306, wR <sub>2</sub> = 0.0819             |
| Final R indexes [all data]                  | R <sub>1</sub> = 0.0327, wR <sub>2</sub> = 0.0832             |
| Largest diff. peak/hole / e Å <sup>-3</sup> | 0.46/-0.49                                                    |

#### 14. <sup>1</sup>H NMR, <sup>13</sup>C NMR and <sup>19</sup>F NMR Spectra of the Compounds

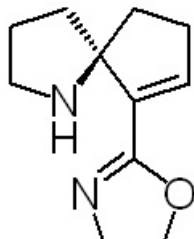

**L1**

**<sup>1</sup>H NMR spectrum (400 MHz, CDCl<sub>3</sub>)**

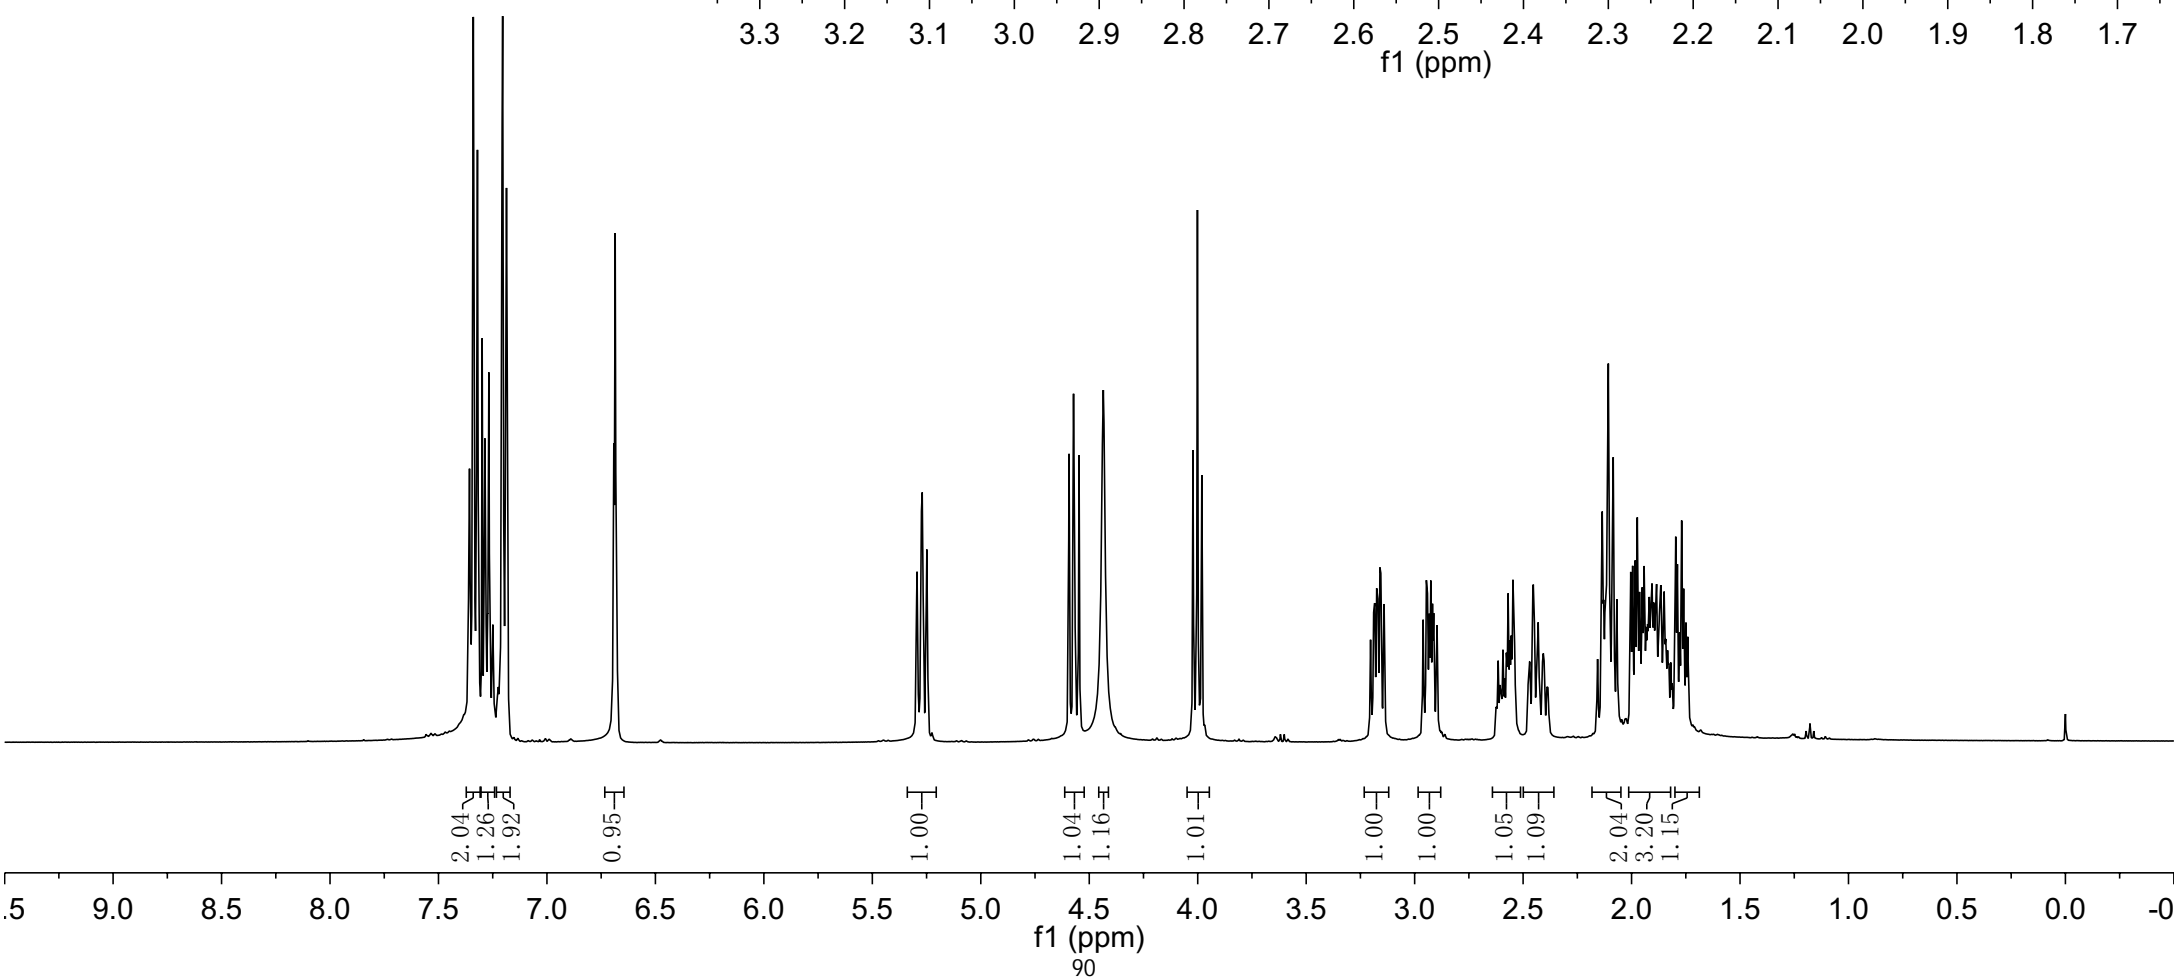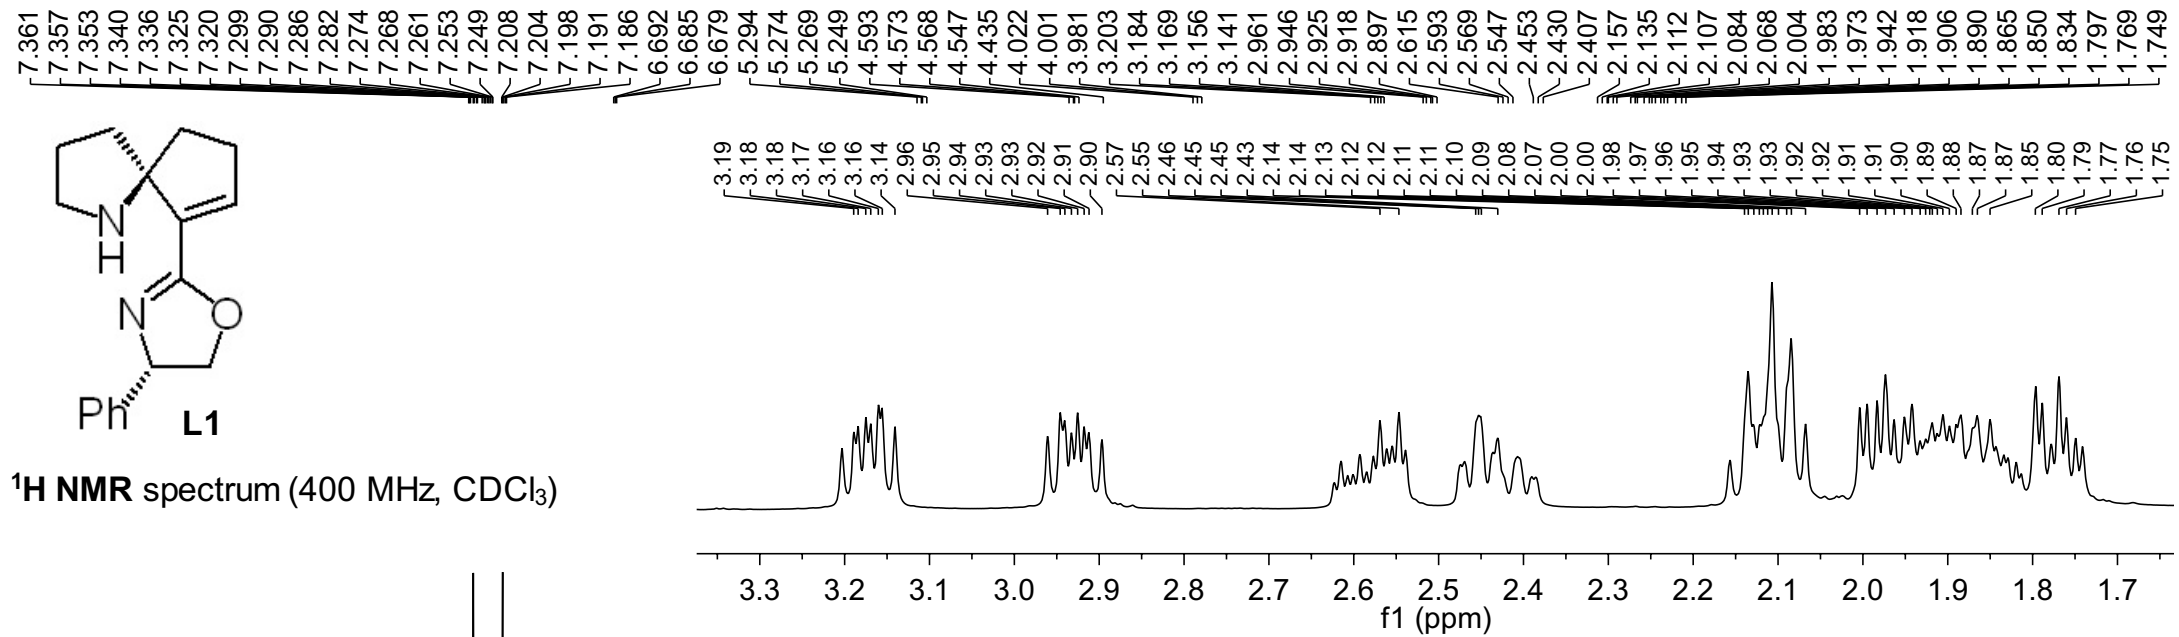

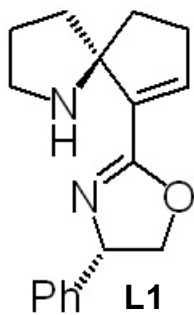

<sup>13</sup>C NMR spectrum (100 MHz, CDCl<sub>3</sub>)

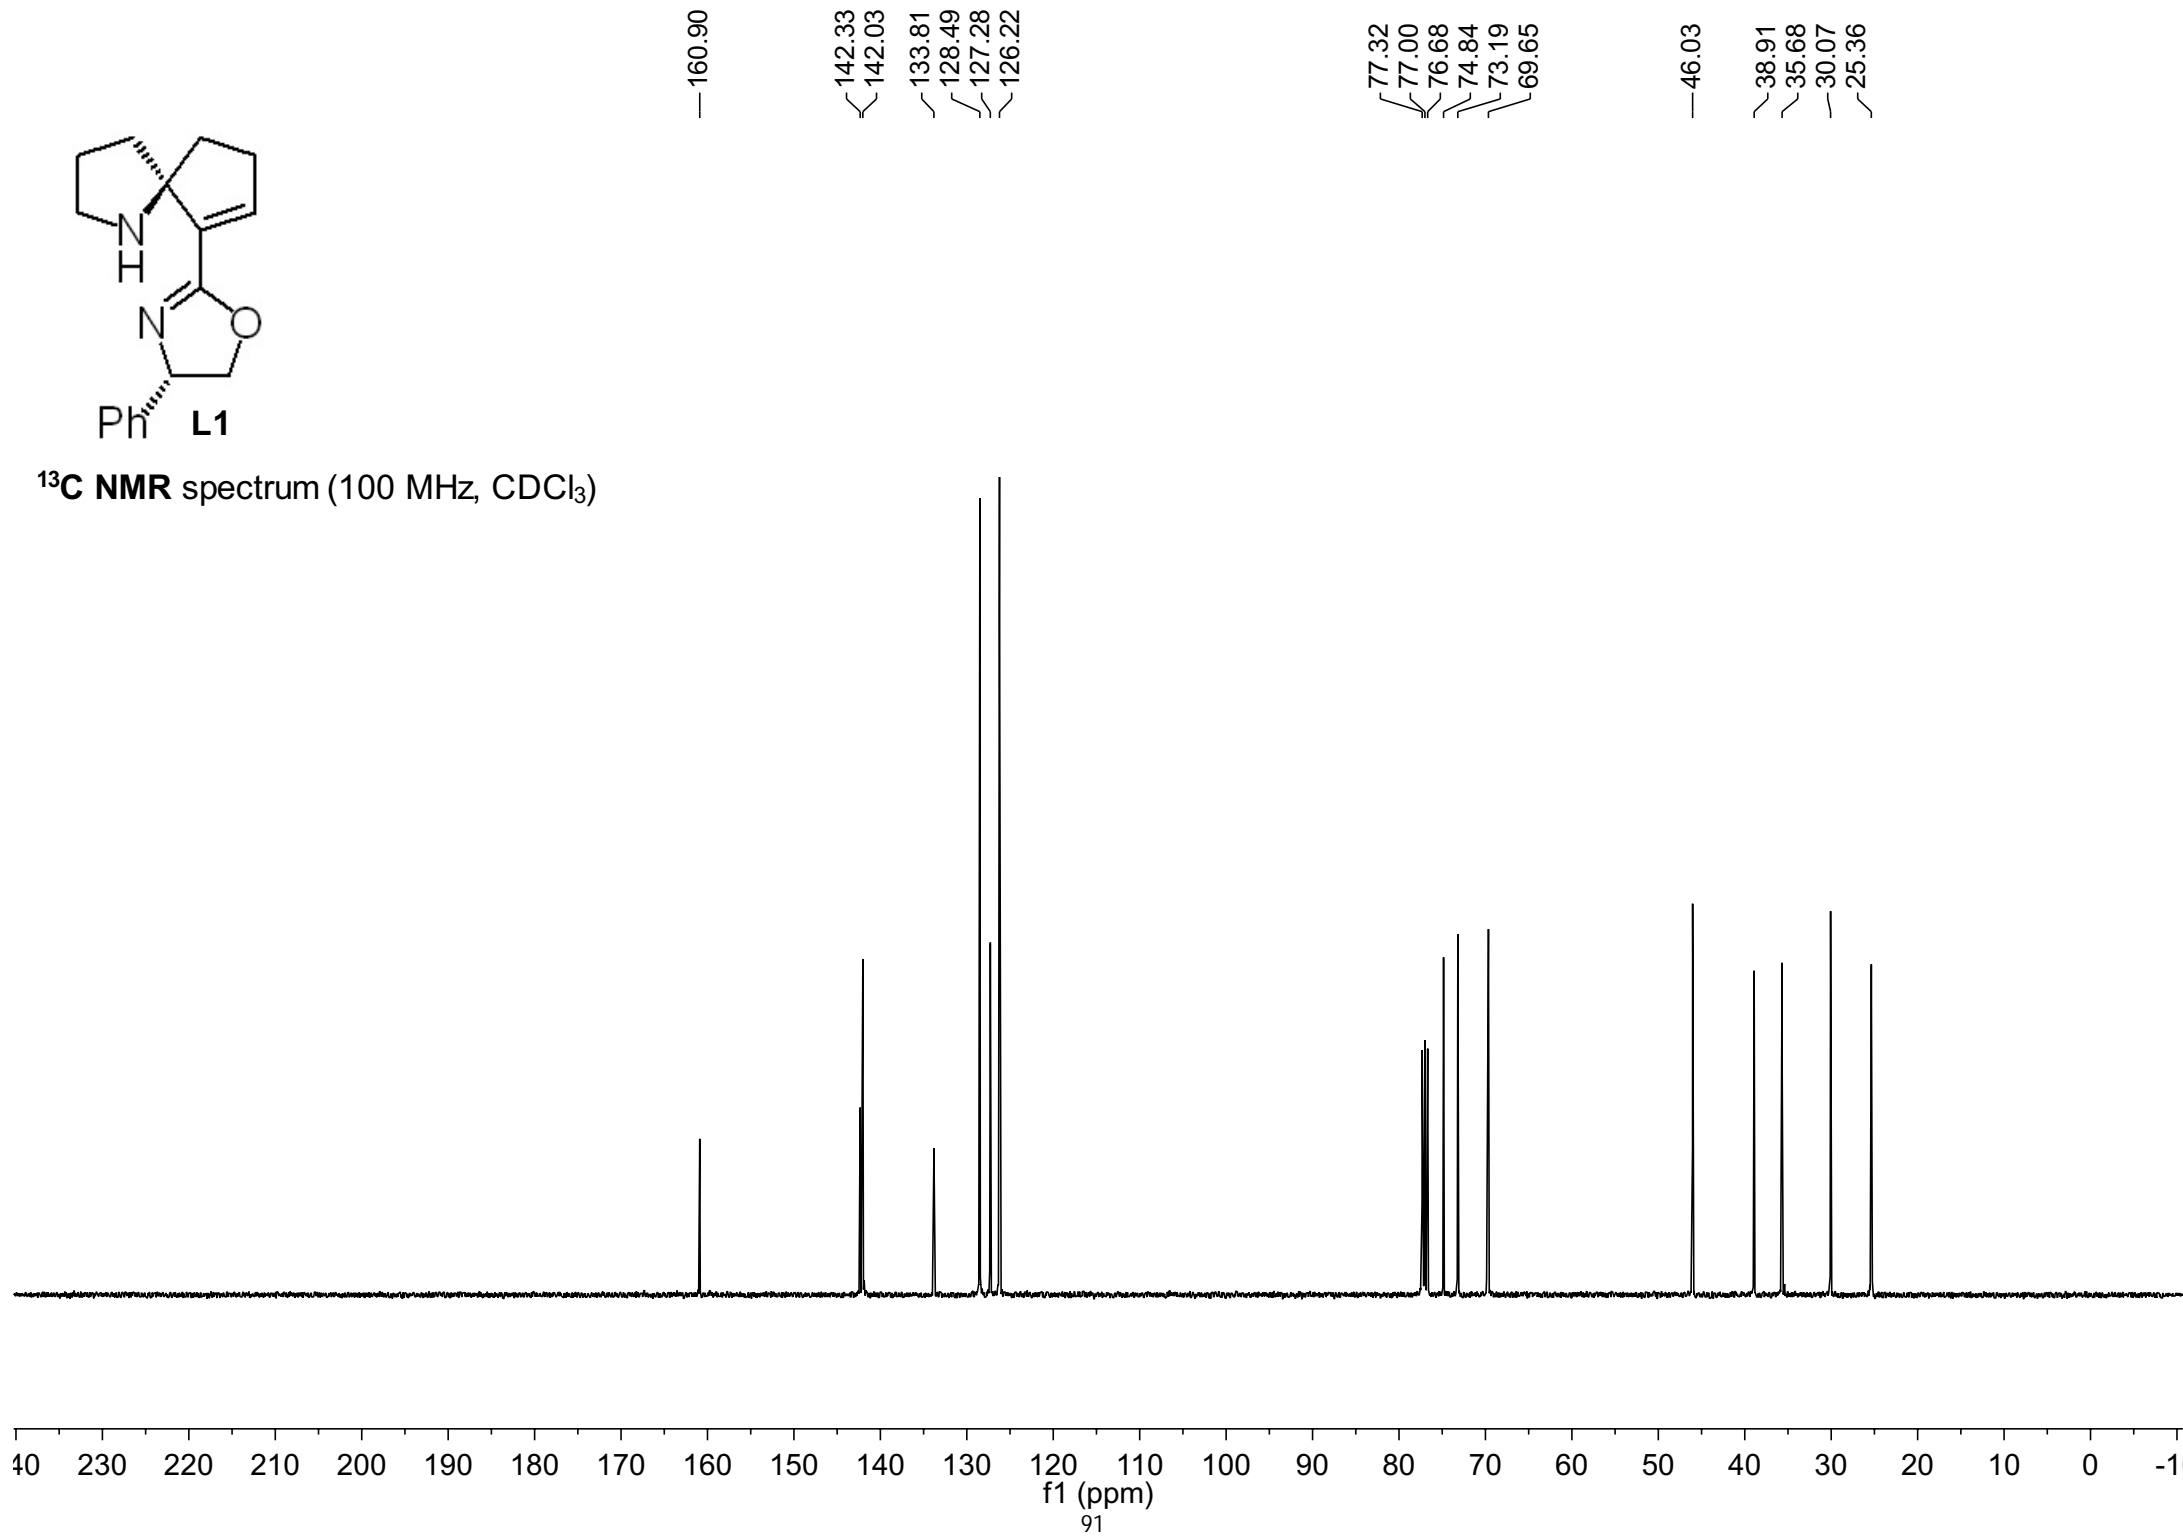



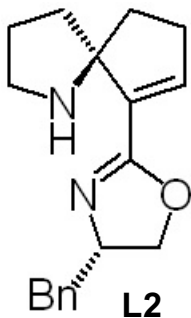

<sup>1</sup>H NMR spectrum (600 MHz, CDCl<sub>3</sub>)

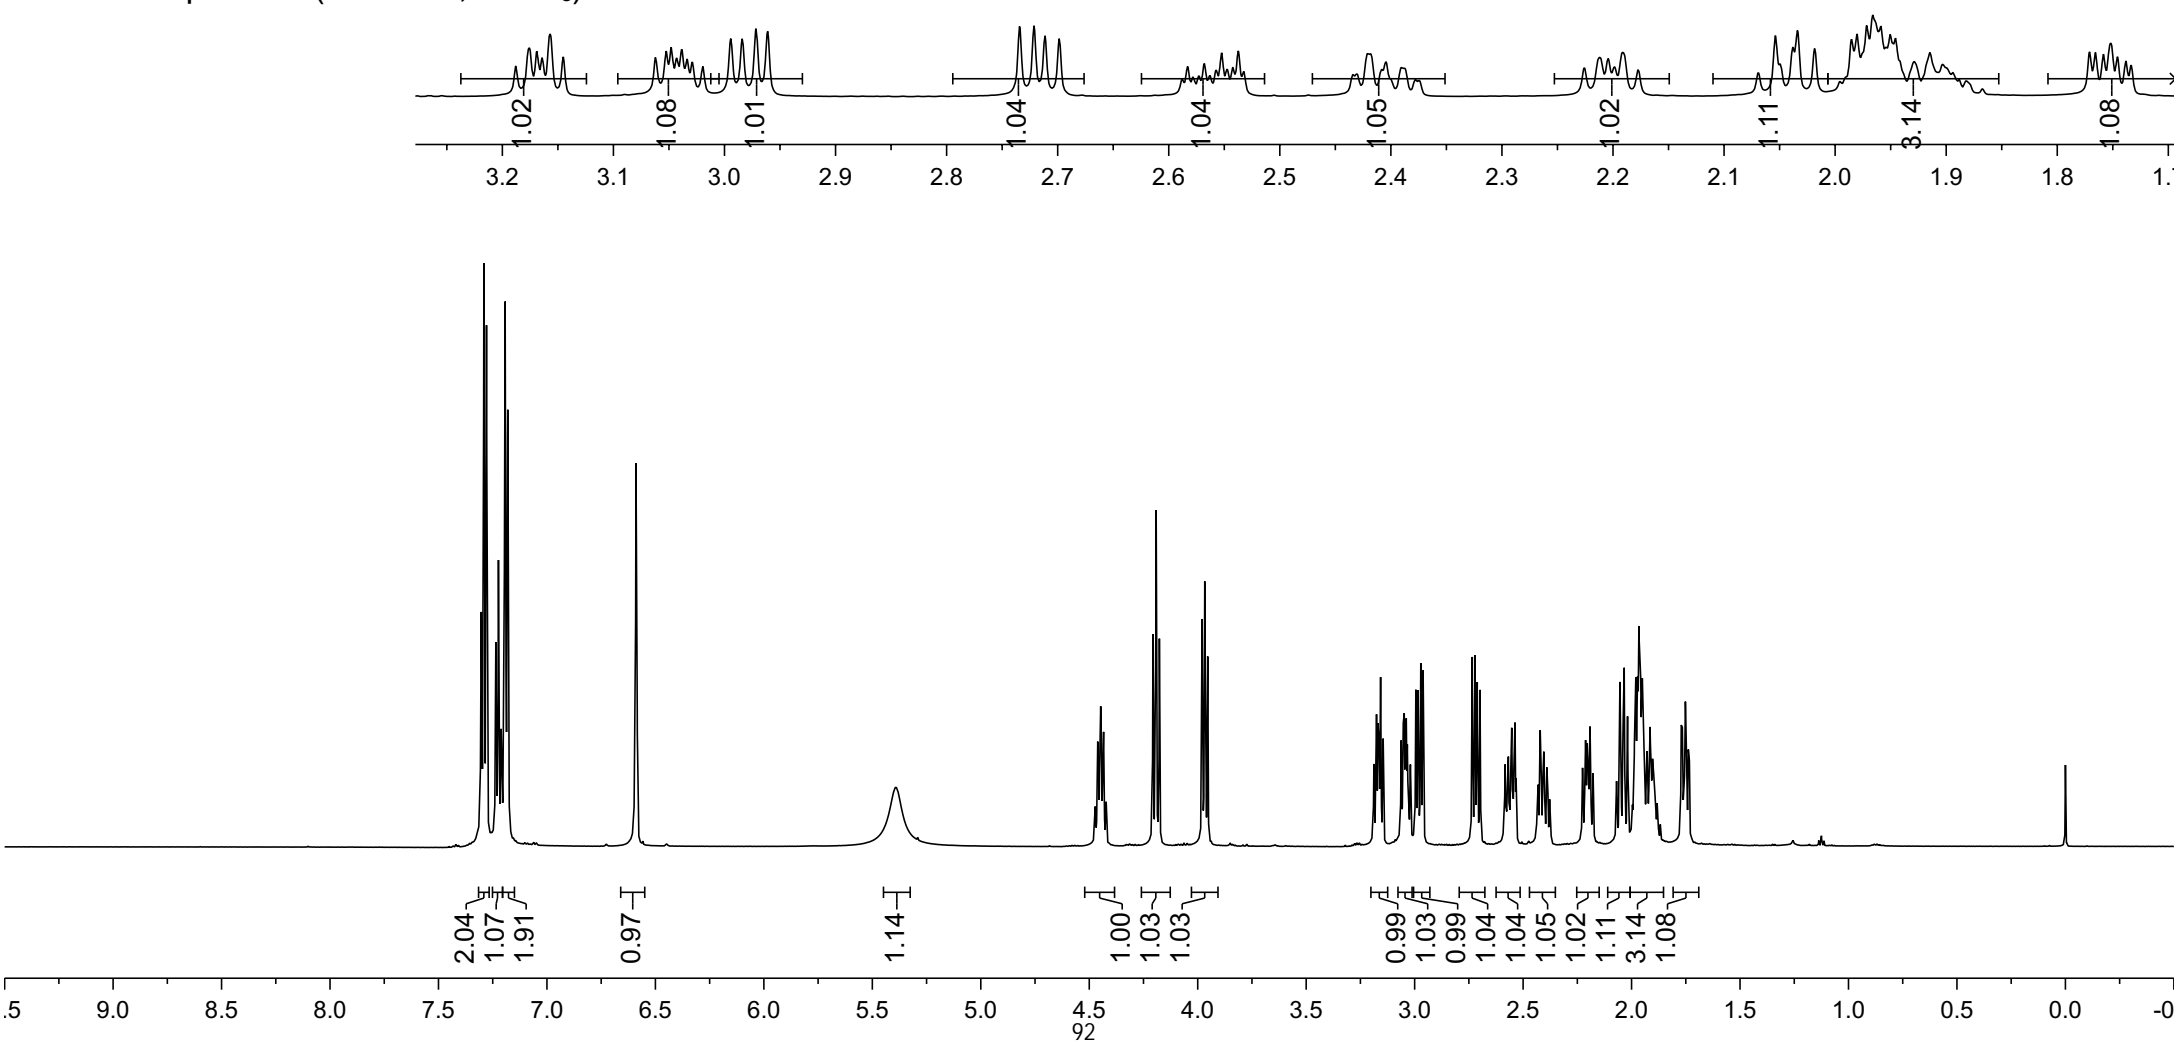

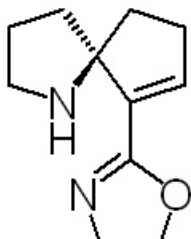

Bn L2

<sup>13</sup>C NMR spectrum (150 MHz, CDCl<sub>3</sub>)

- 160.12
- 141.86
- 137.76
- 133.17
- 129.19
- 128.33
- 126.43
- 77.21
- 77.00
- 76.79
- 75.28
- 70.53
- 67.35
- 45.94
- 41.69
- 38.45
- 35.56
- 30.14
- 25.19

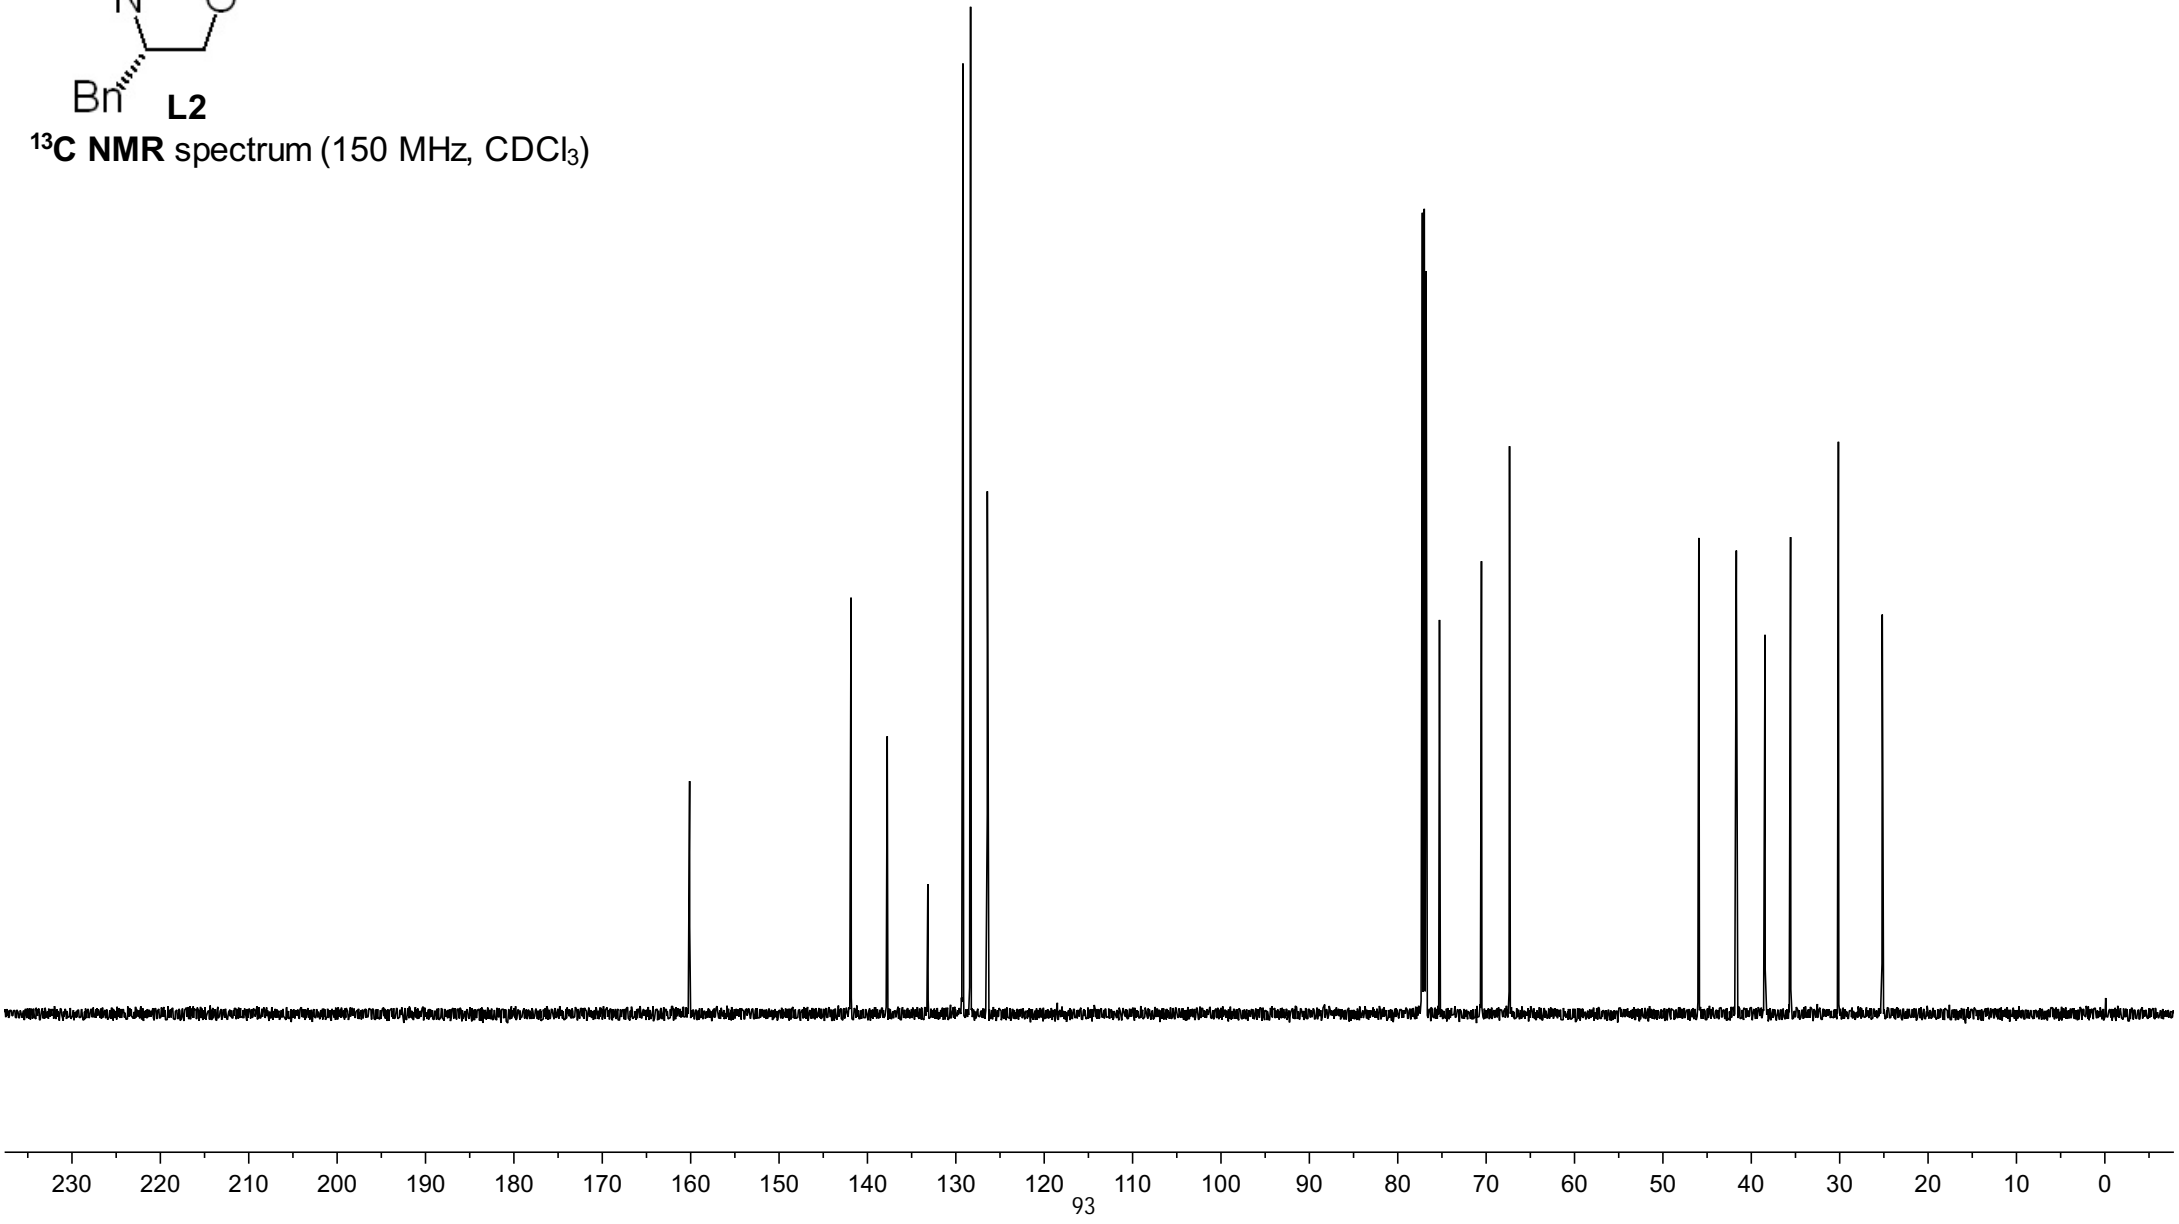



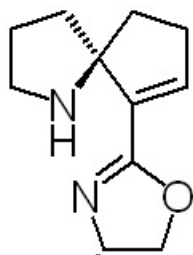

i-Pr L3

<sup>13</sup>C NMR spectrum (150 MHz, CDCl<sub>3</sub>)

—159.69

—141.65

—132.82

{ 77.21  
77.00  
76.79  
75.59  
72.02  
69.10

—45.96

—38.16

—35.73

—32.80

—30.21

—25.17

—18.51

—18.39

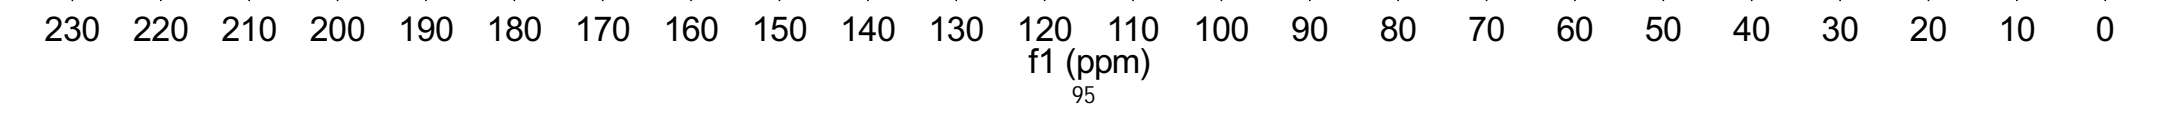

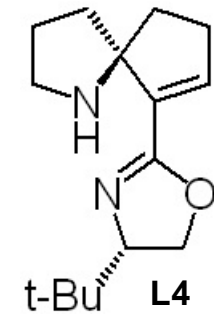

<sup>1</sup>H NMR spectrum (600 MHz, CDCl<sub>3</sub>)

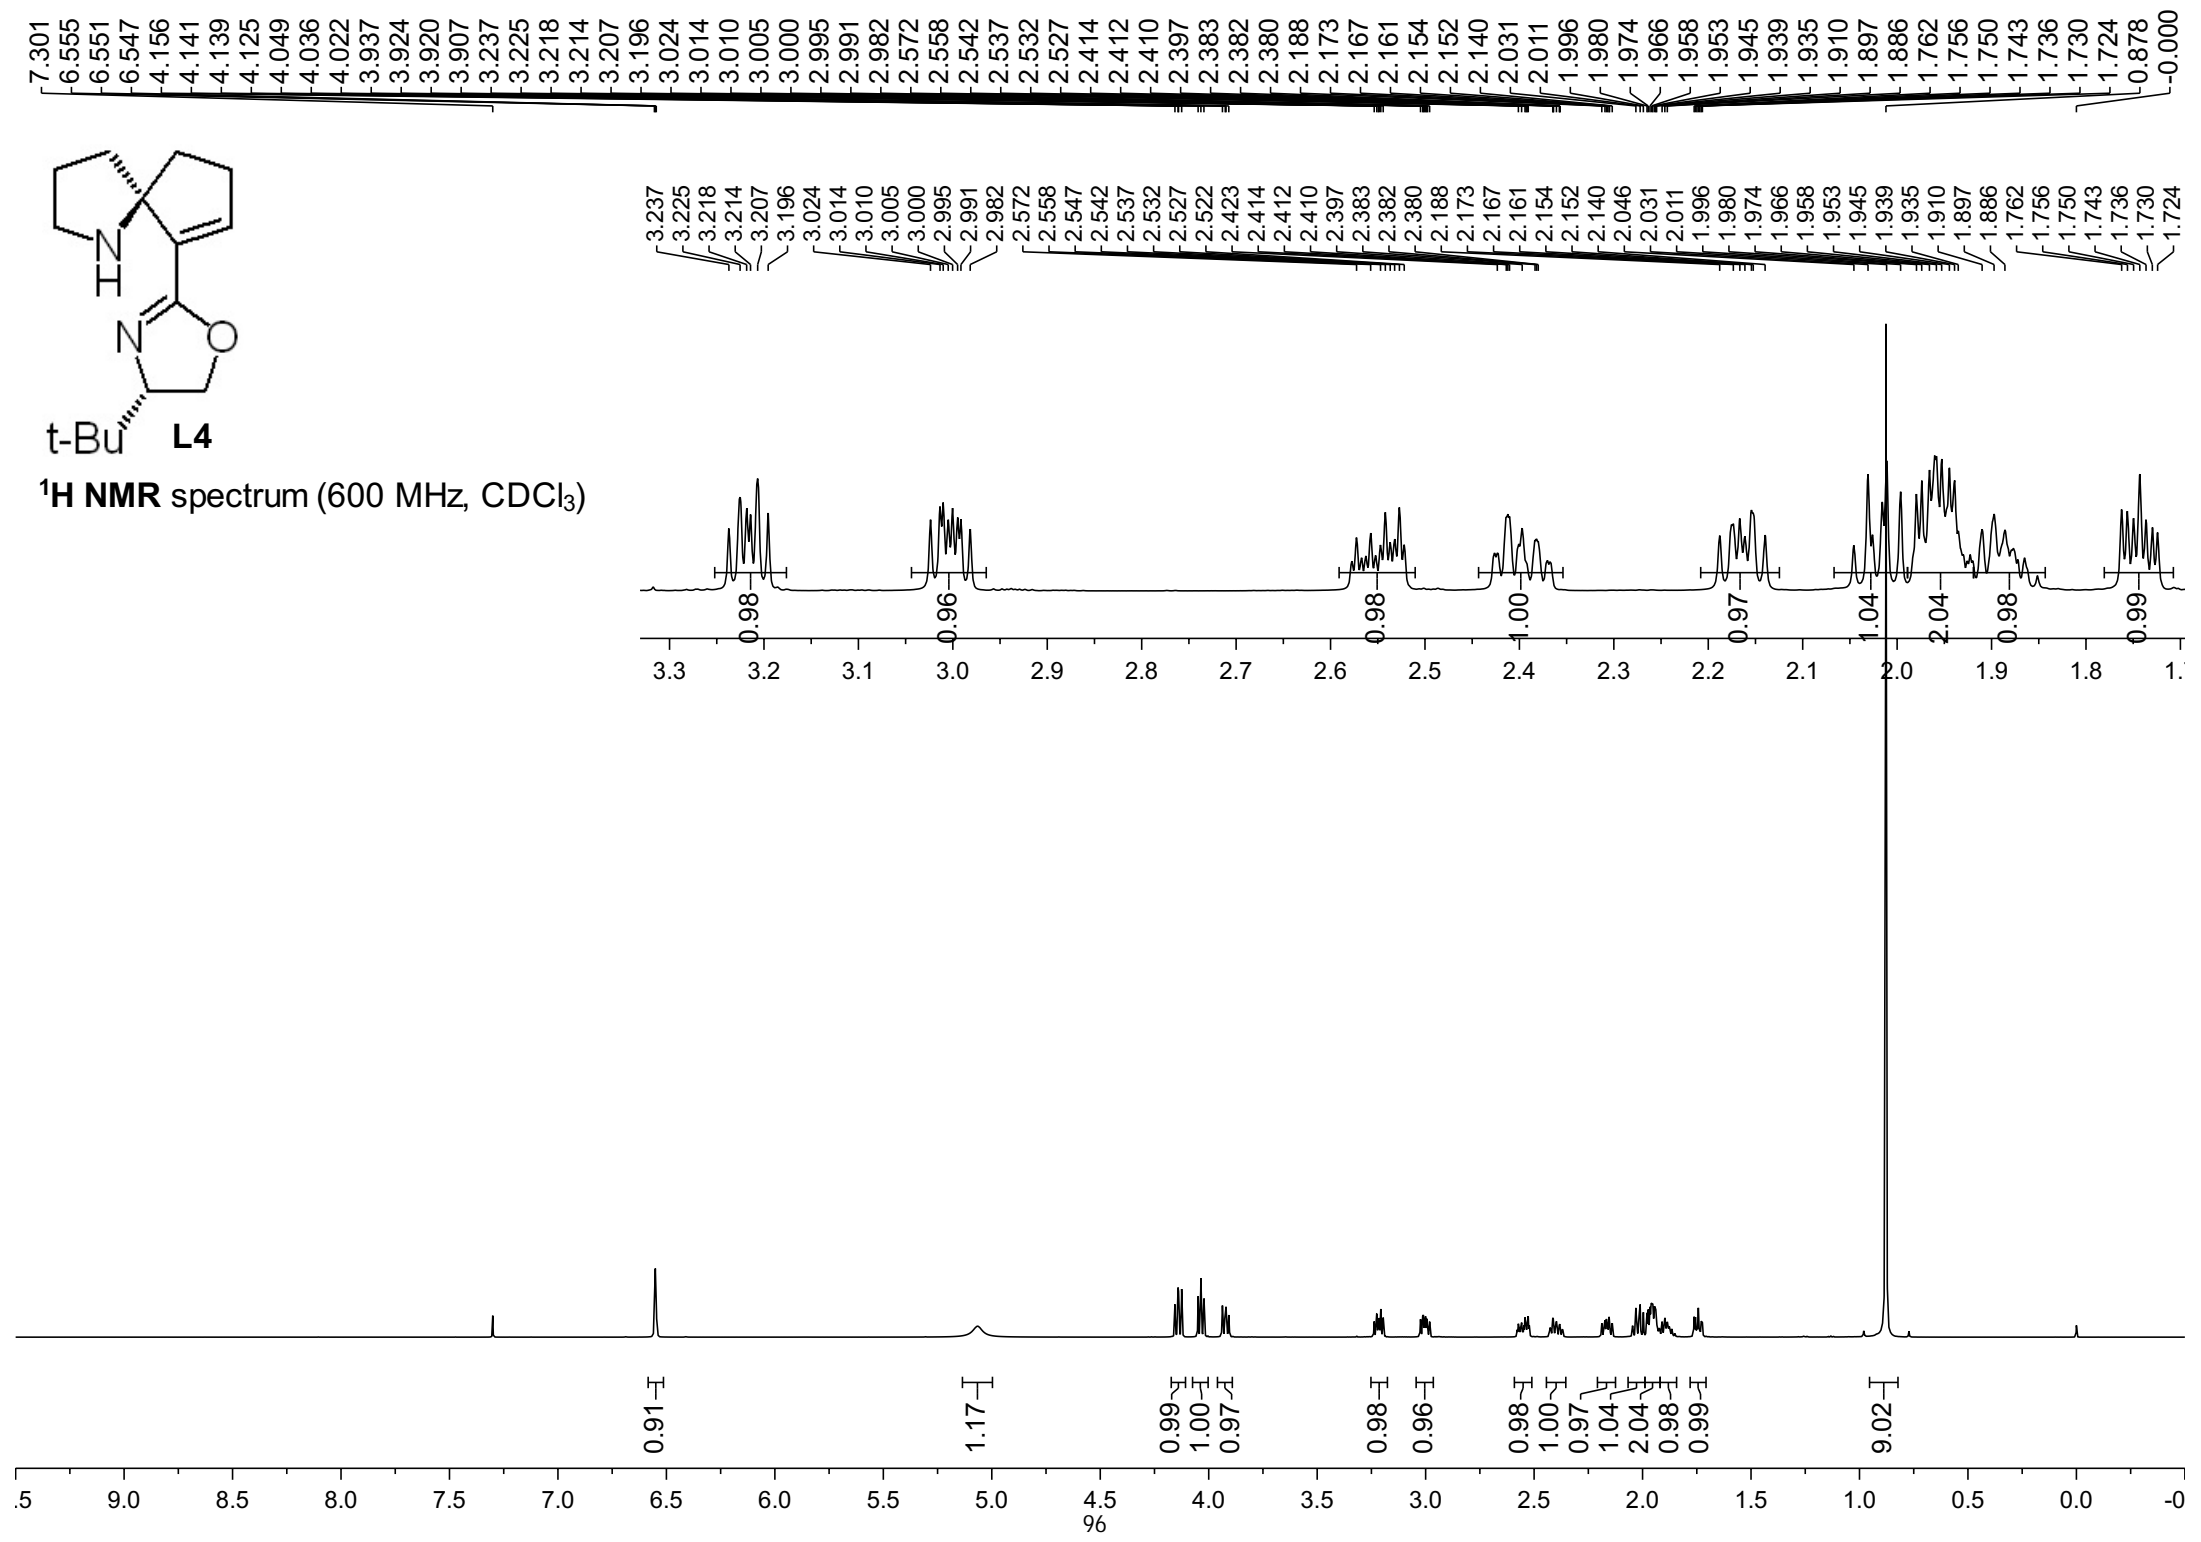

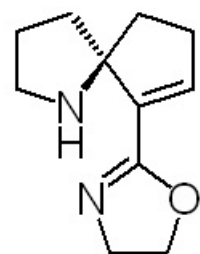

t-Bu L4

$^{13}\text{C}$  NMR spectrum (150 MHz,  $\text{CDCl}_3$ )

— 159.48

— 140.88

— 133.93

77.21  
77.00  
76.79  
75.74  
75.12  
— 67.26

— 46.41

— 39.21

— 35.98

~ 33.87

~ 30.12

— 25.76

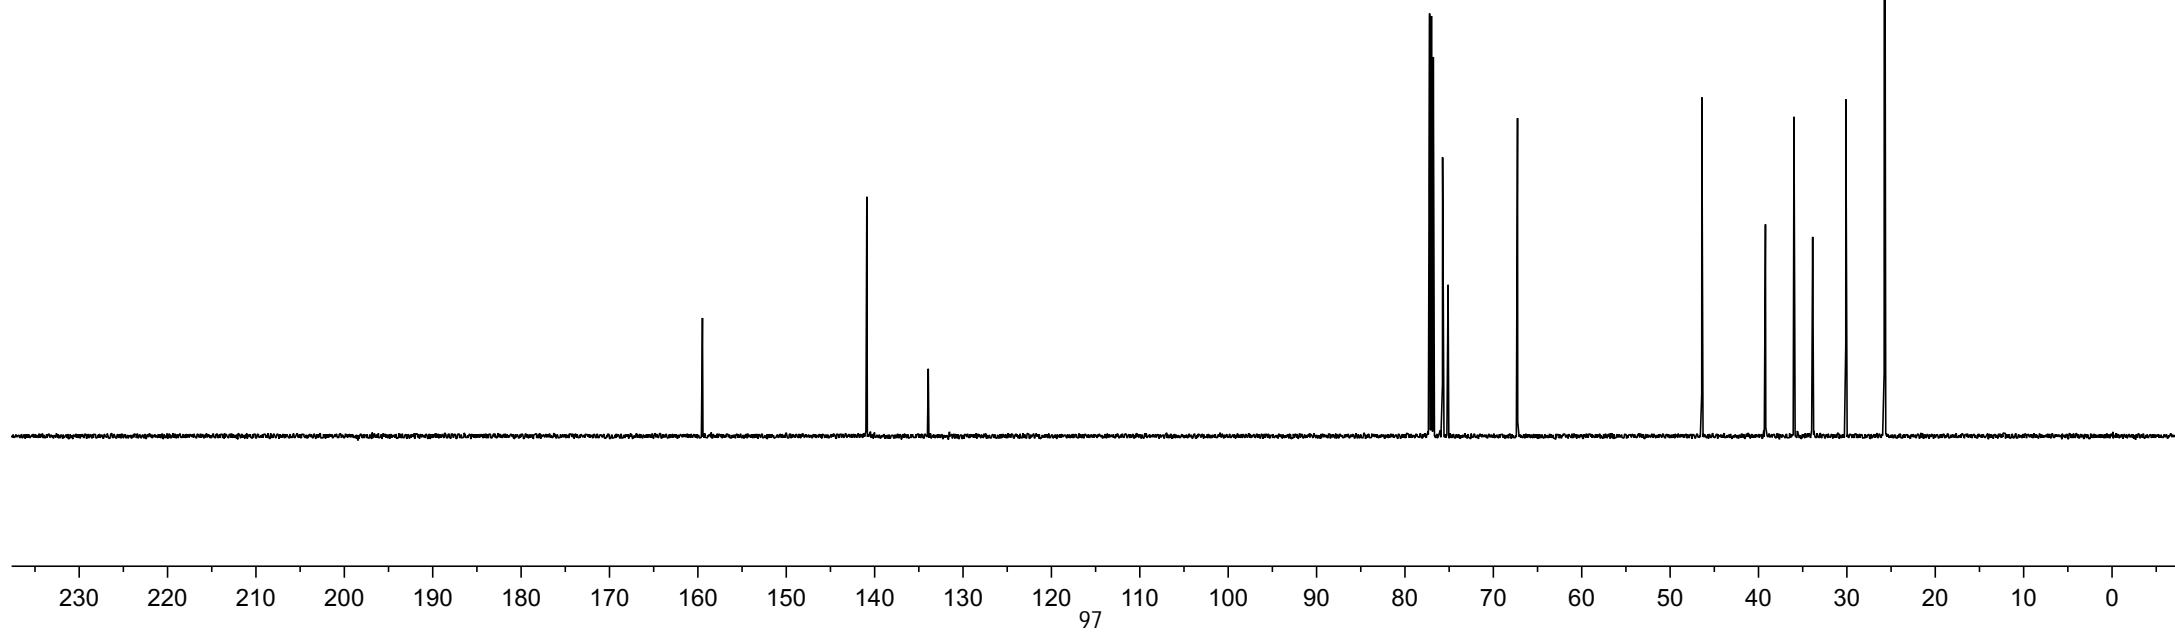

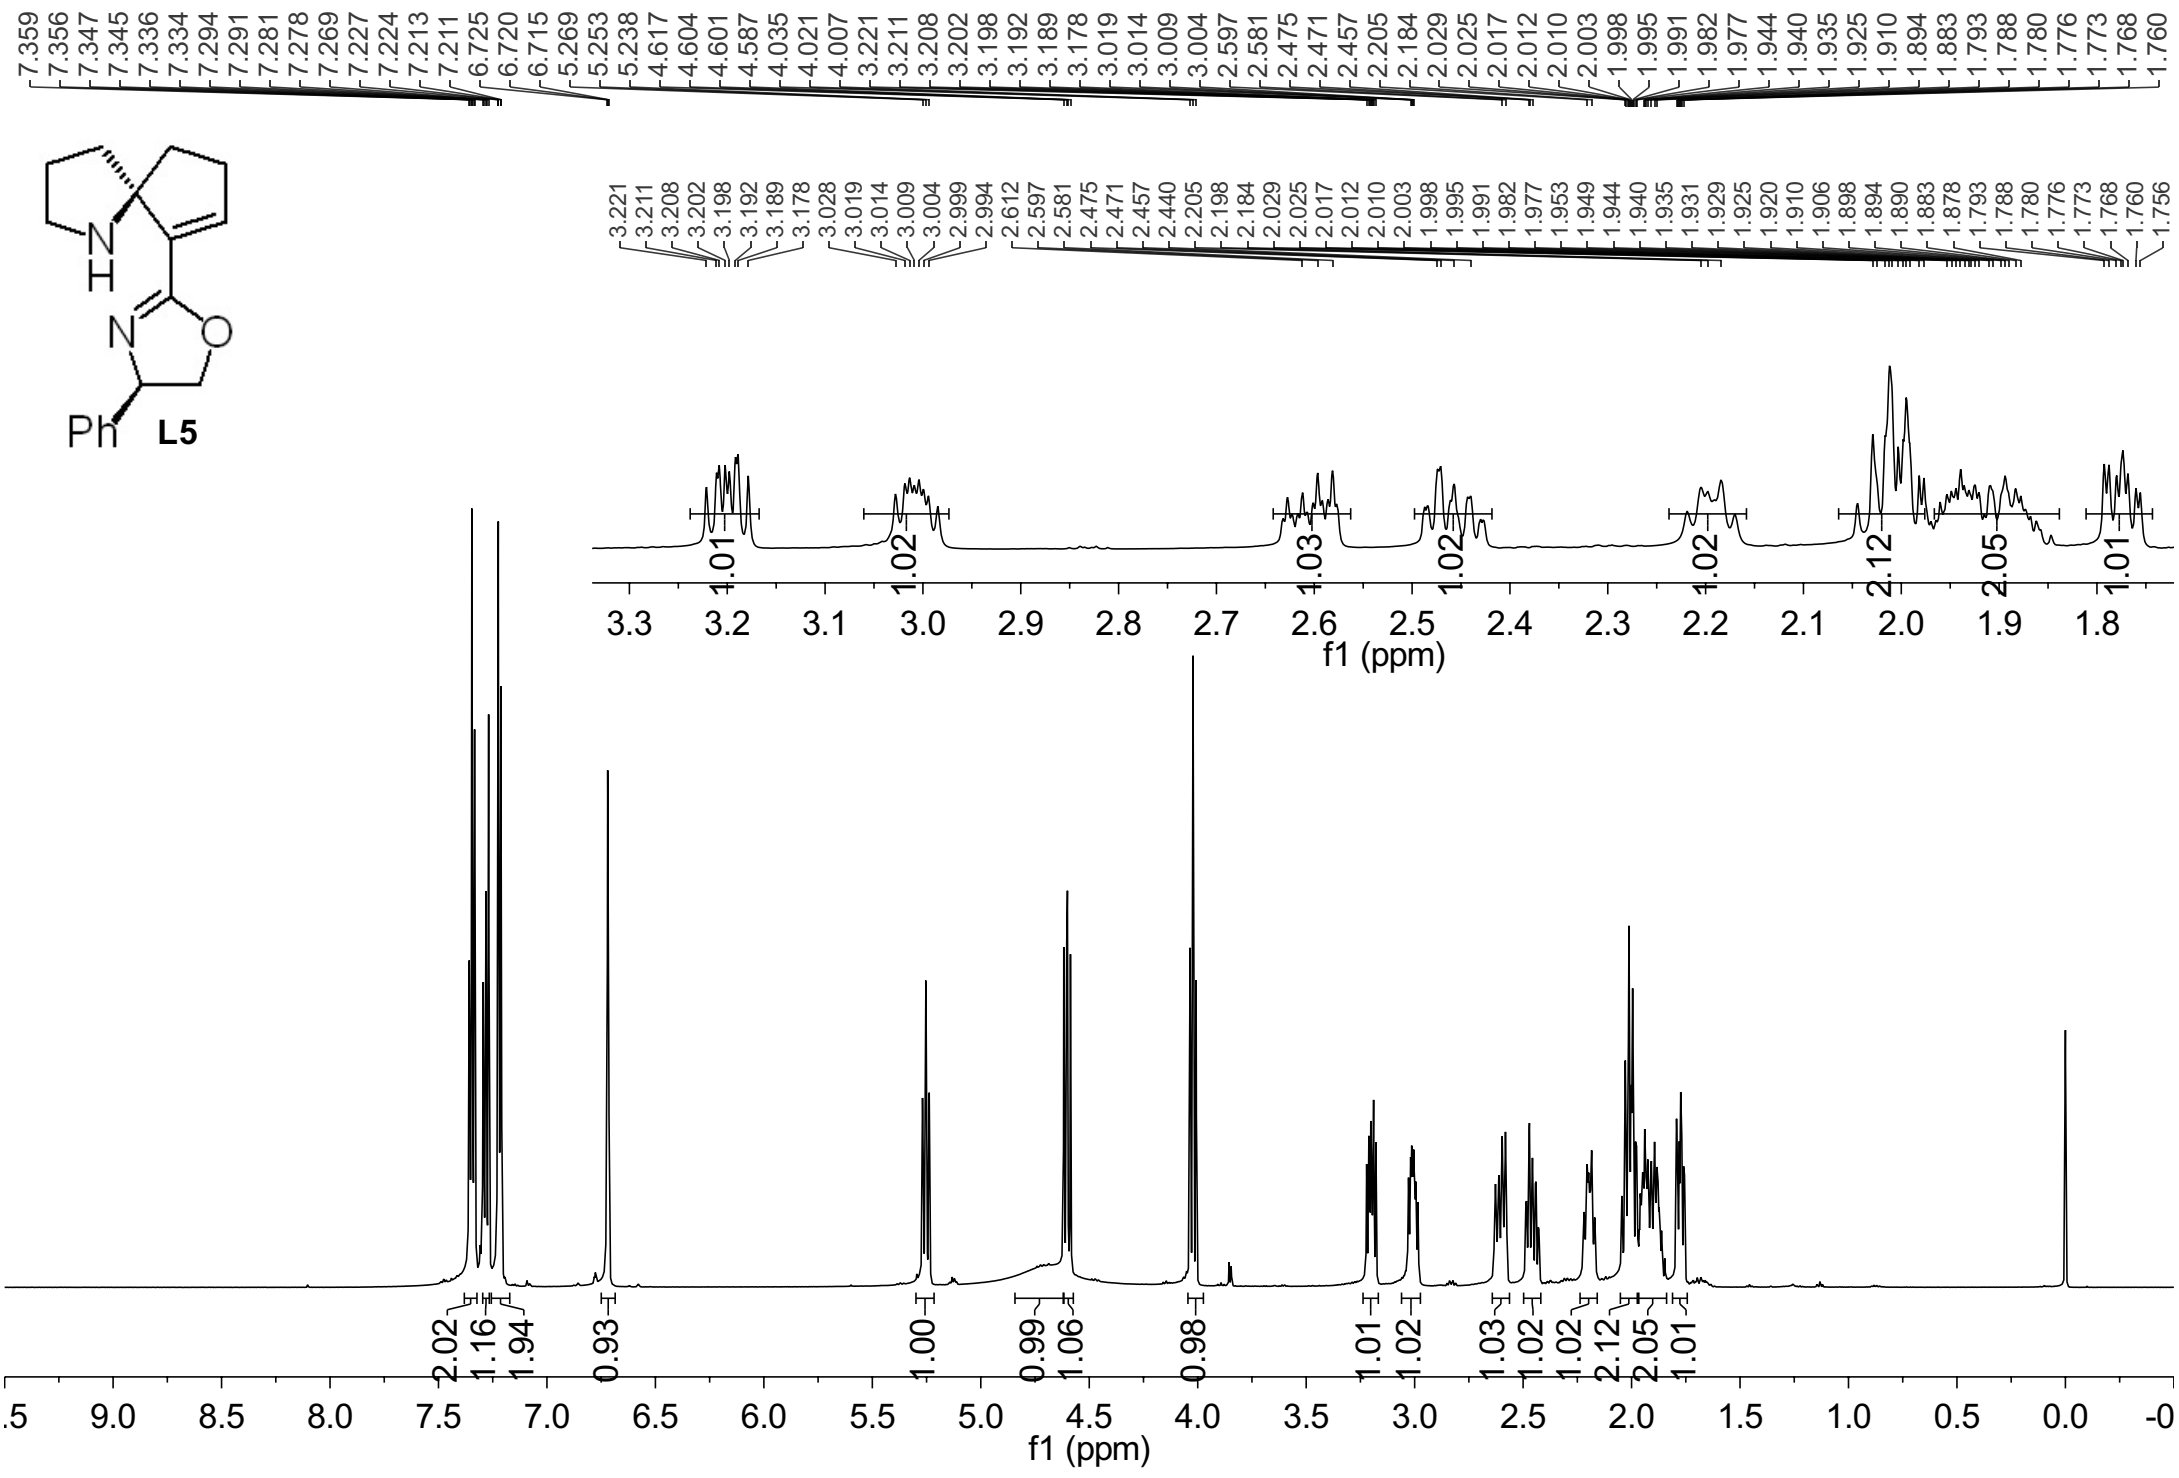

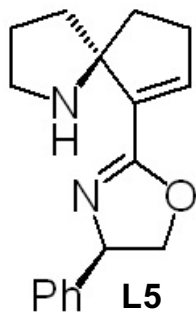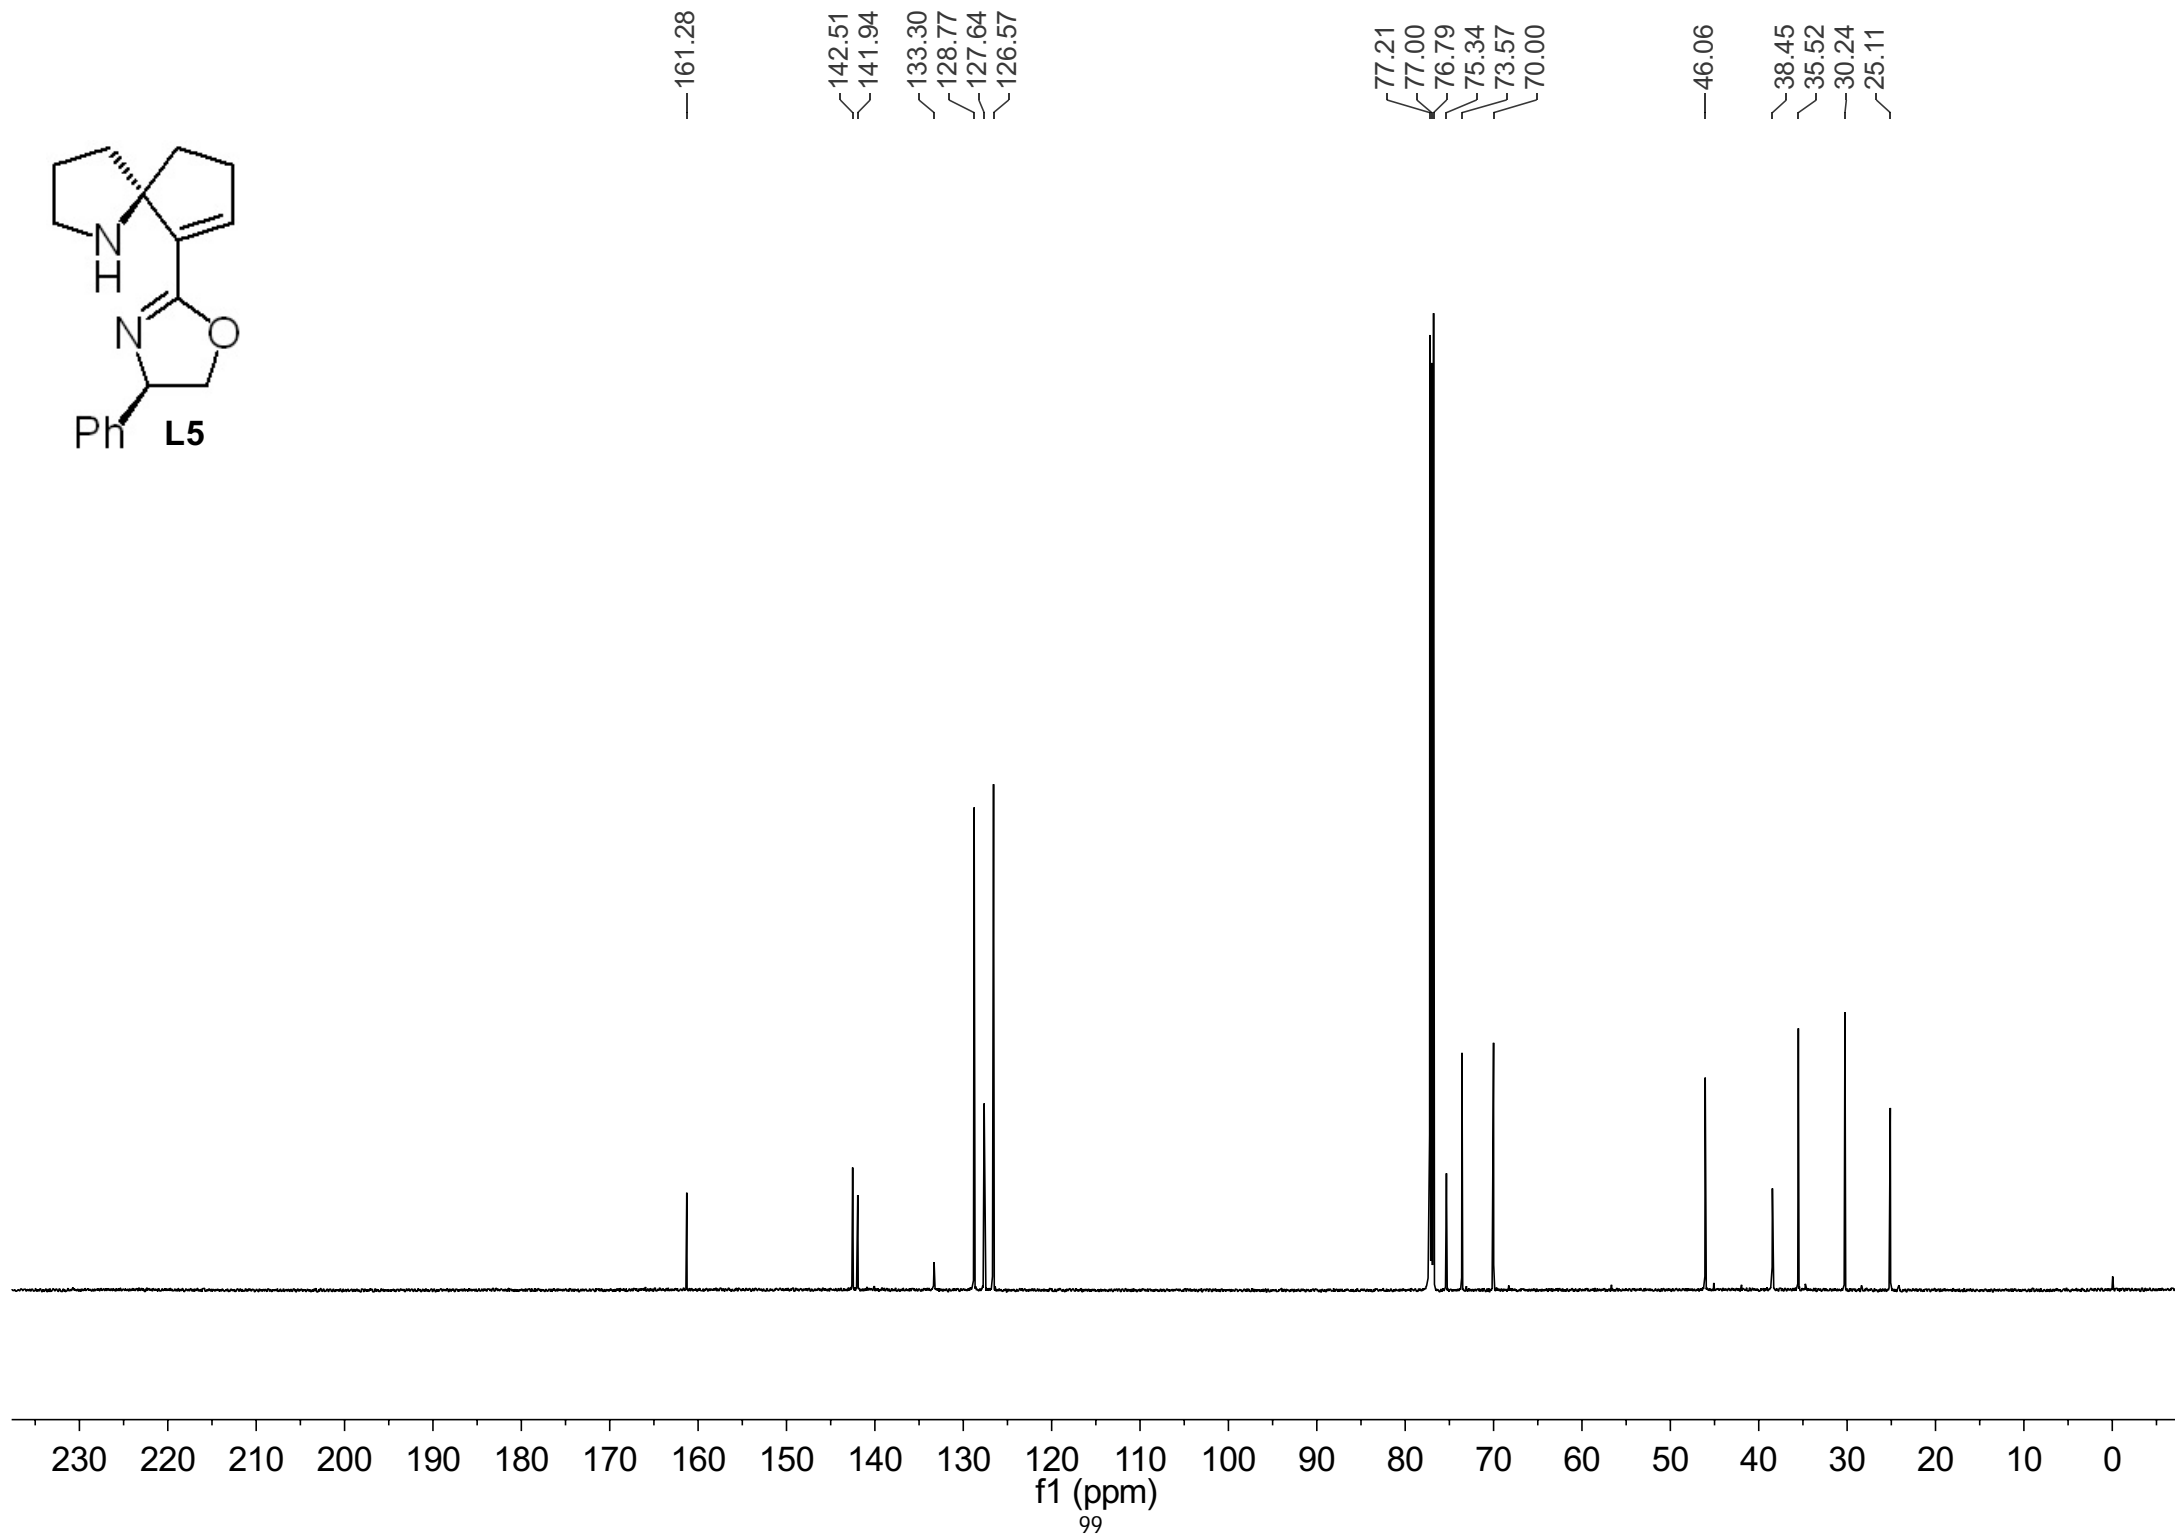



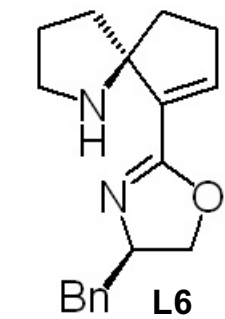

**<sup>1</sup>H NMR spectrum (600 MHz, CDCl<sub>3</sub>)**

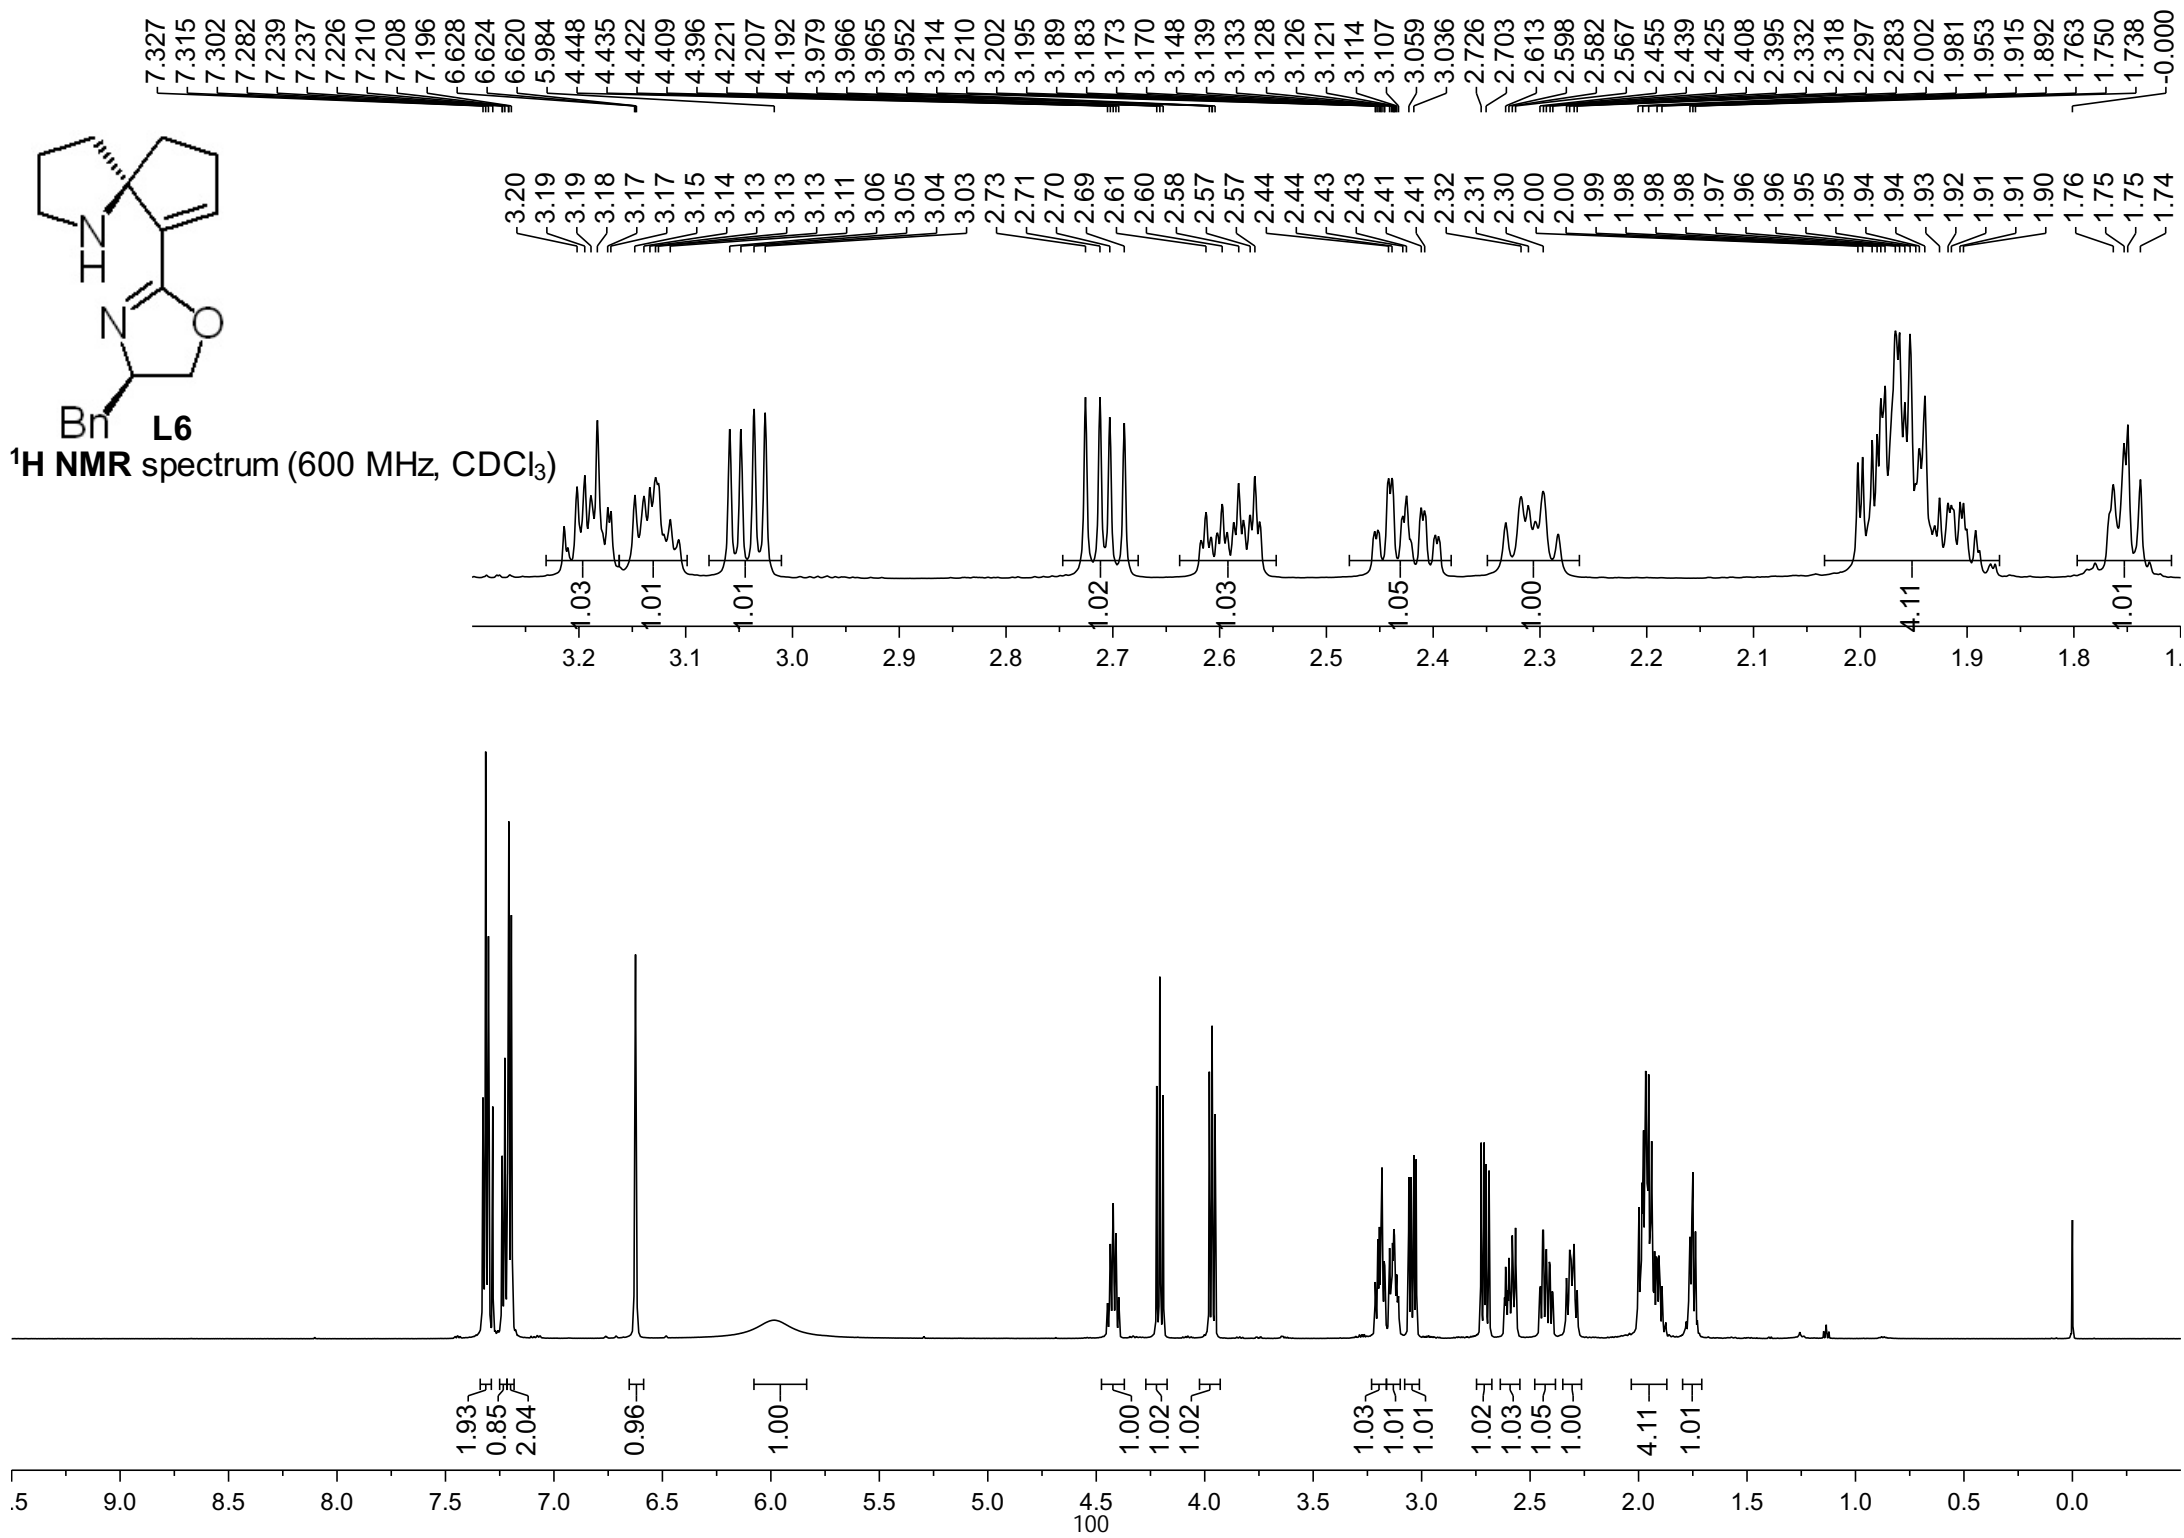

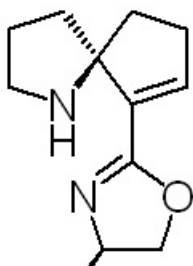

Bn L6

$^{13}\text{C}$  NMR spectrum (150 MHz,  $\text{CDCl}_3$ )

— 160.24

~ 142.24  
/ 137.85  
/ 132.55  
/ 129.09  
/ 128.49  
~ 126.46

{ 77.21  
/ 77.00  
/ 76.79  
/ 75.55  
/ 70.83  
/ 67.65

~ 45.69  
~ 41.74  
~ 37.84  
~ 35.36  
— 30.18  
/ 24.81

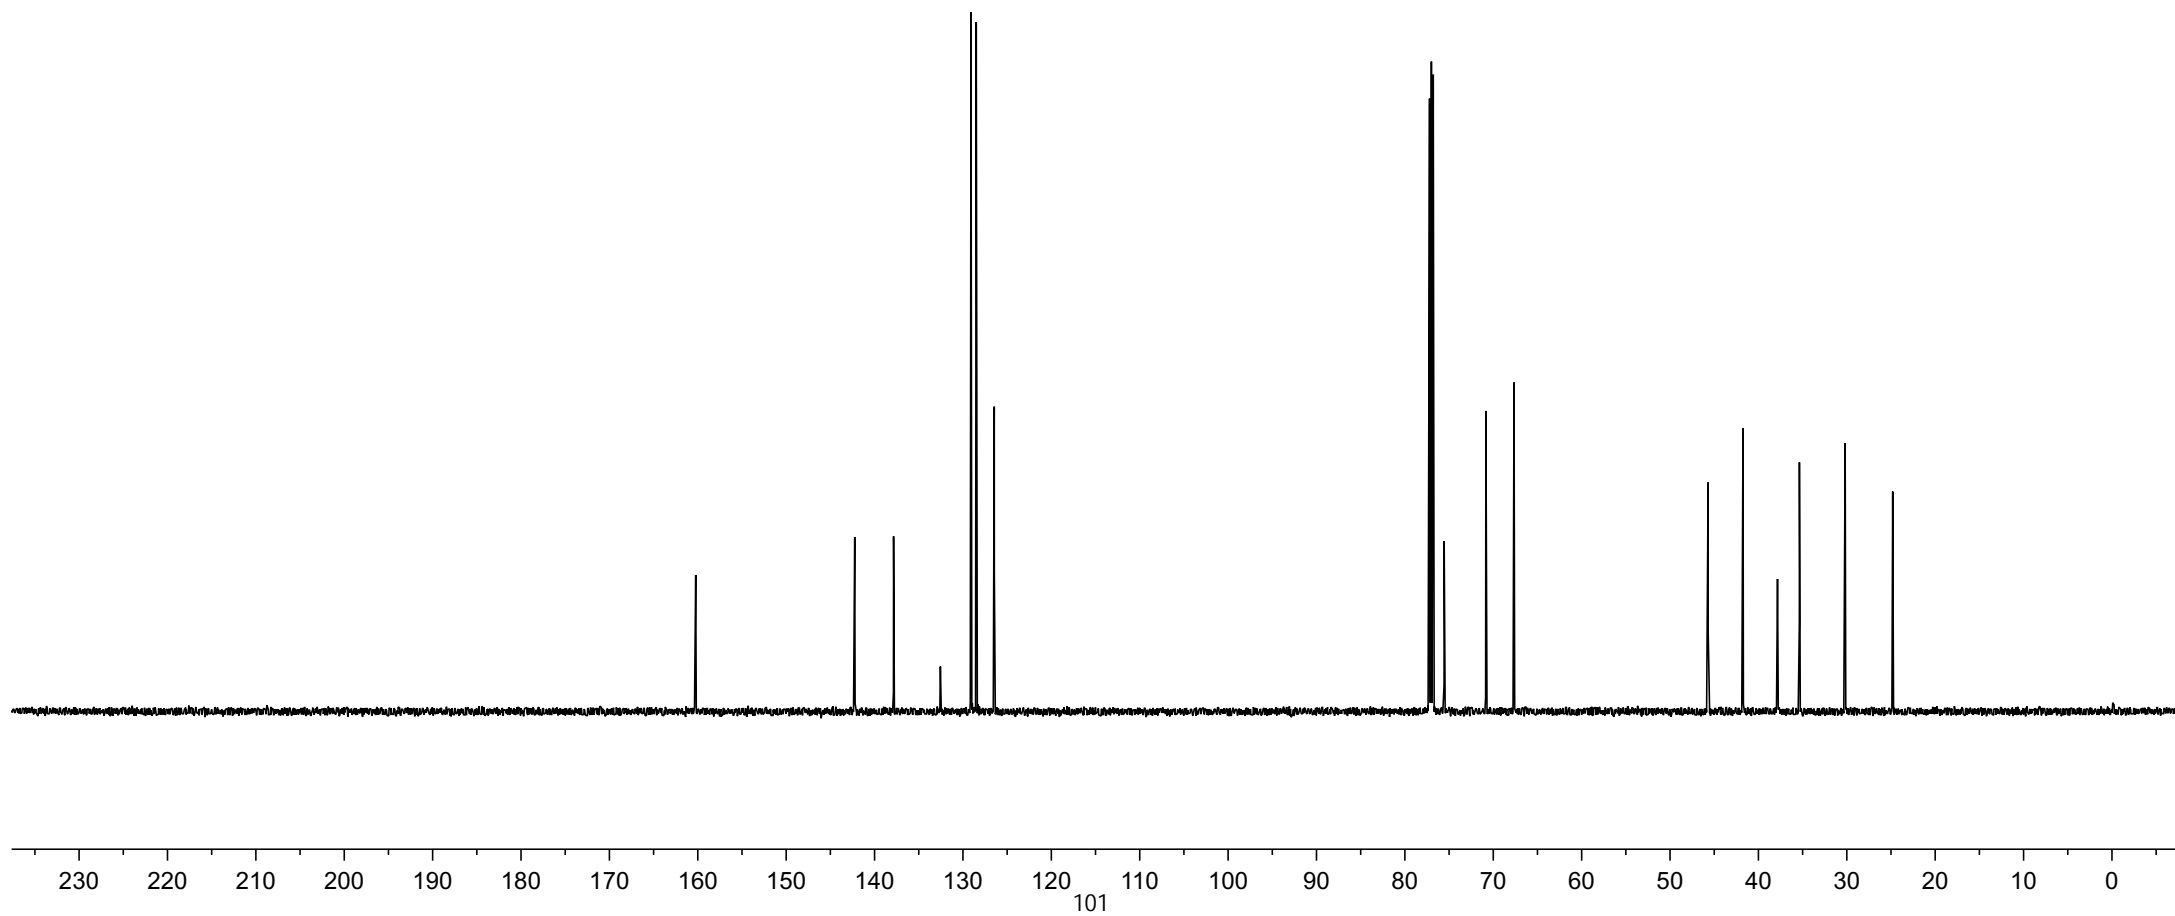

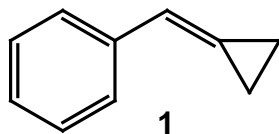

<sup>1</sup>H NMR spectrum (400 MHz, CDCl<sub>3</sub>)

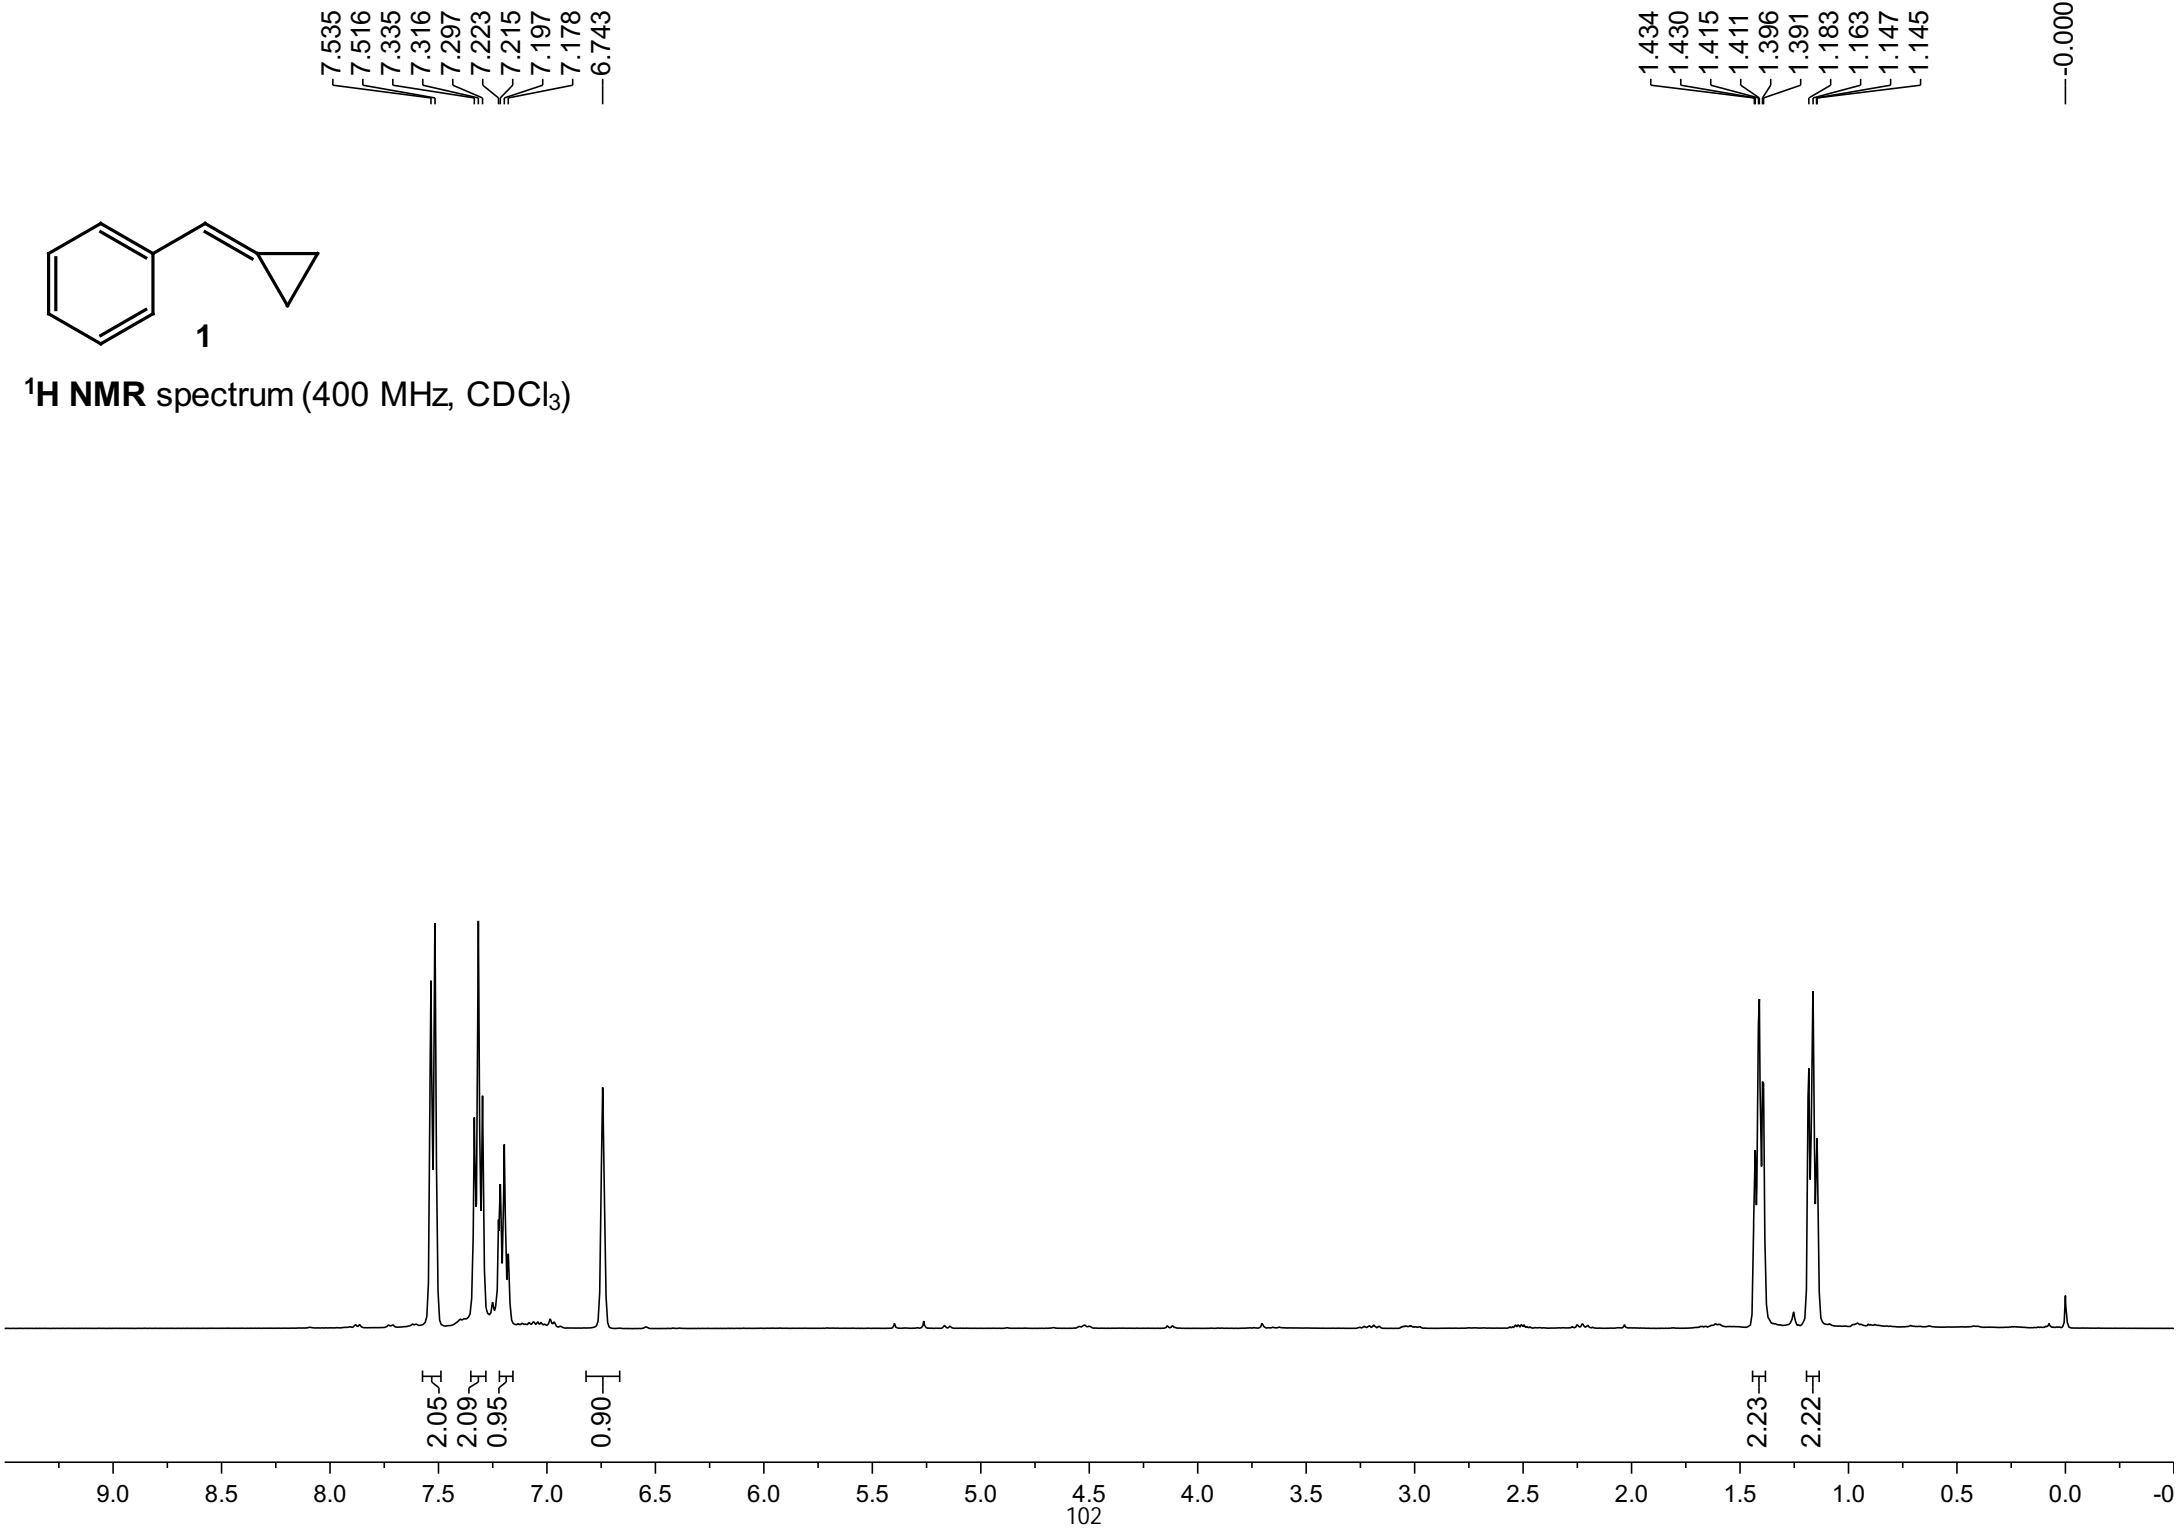

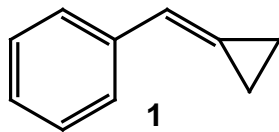

$^{13}\text{C}$  NMR spectrum (100 MHz,  $\text{CDCl}_3$ )

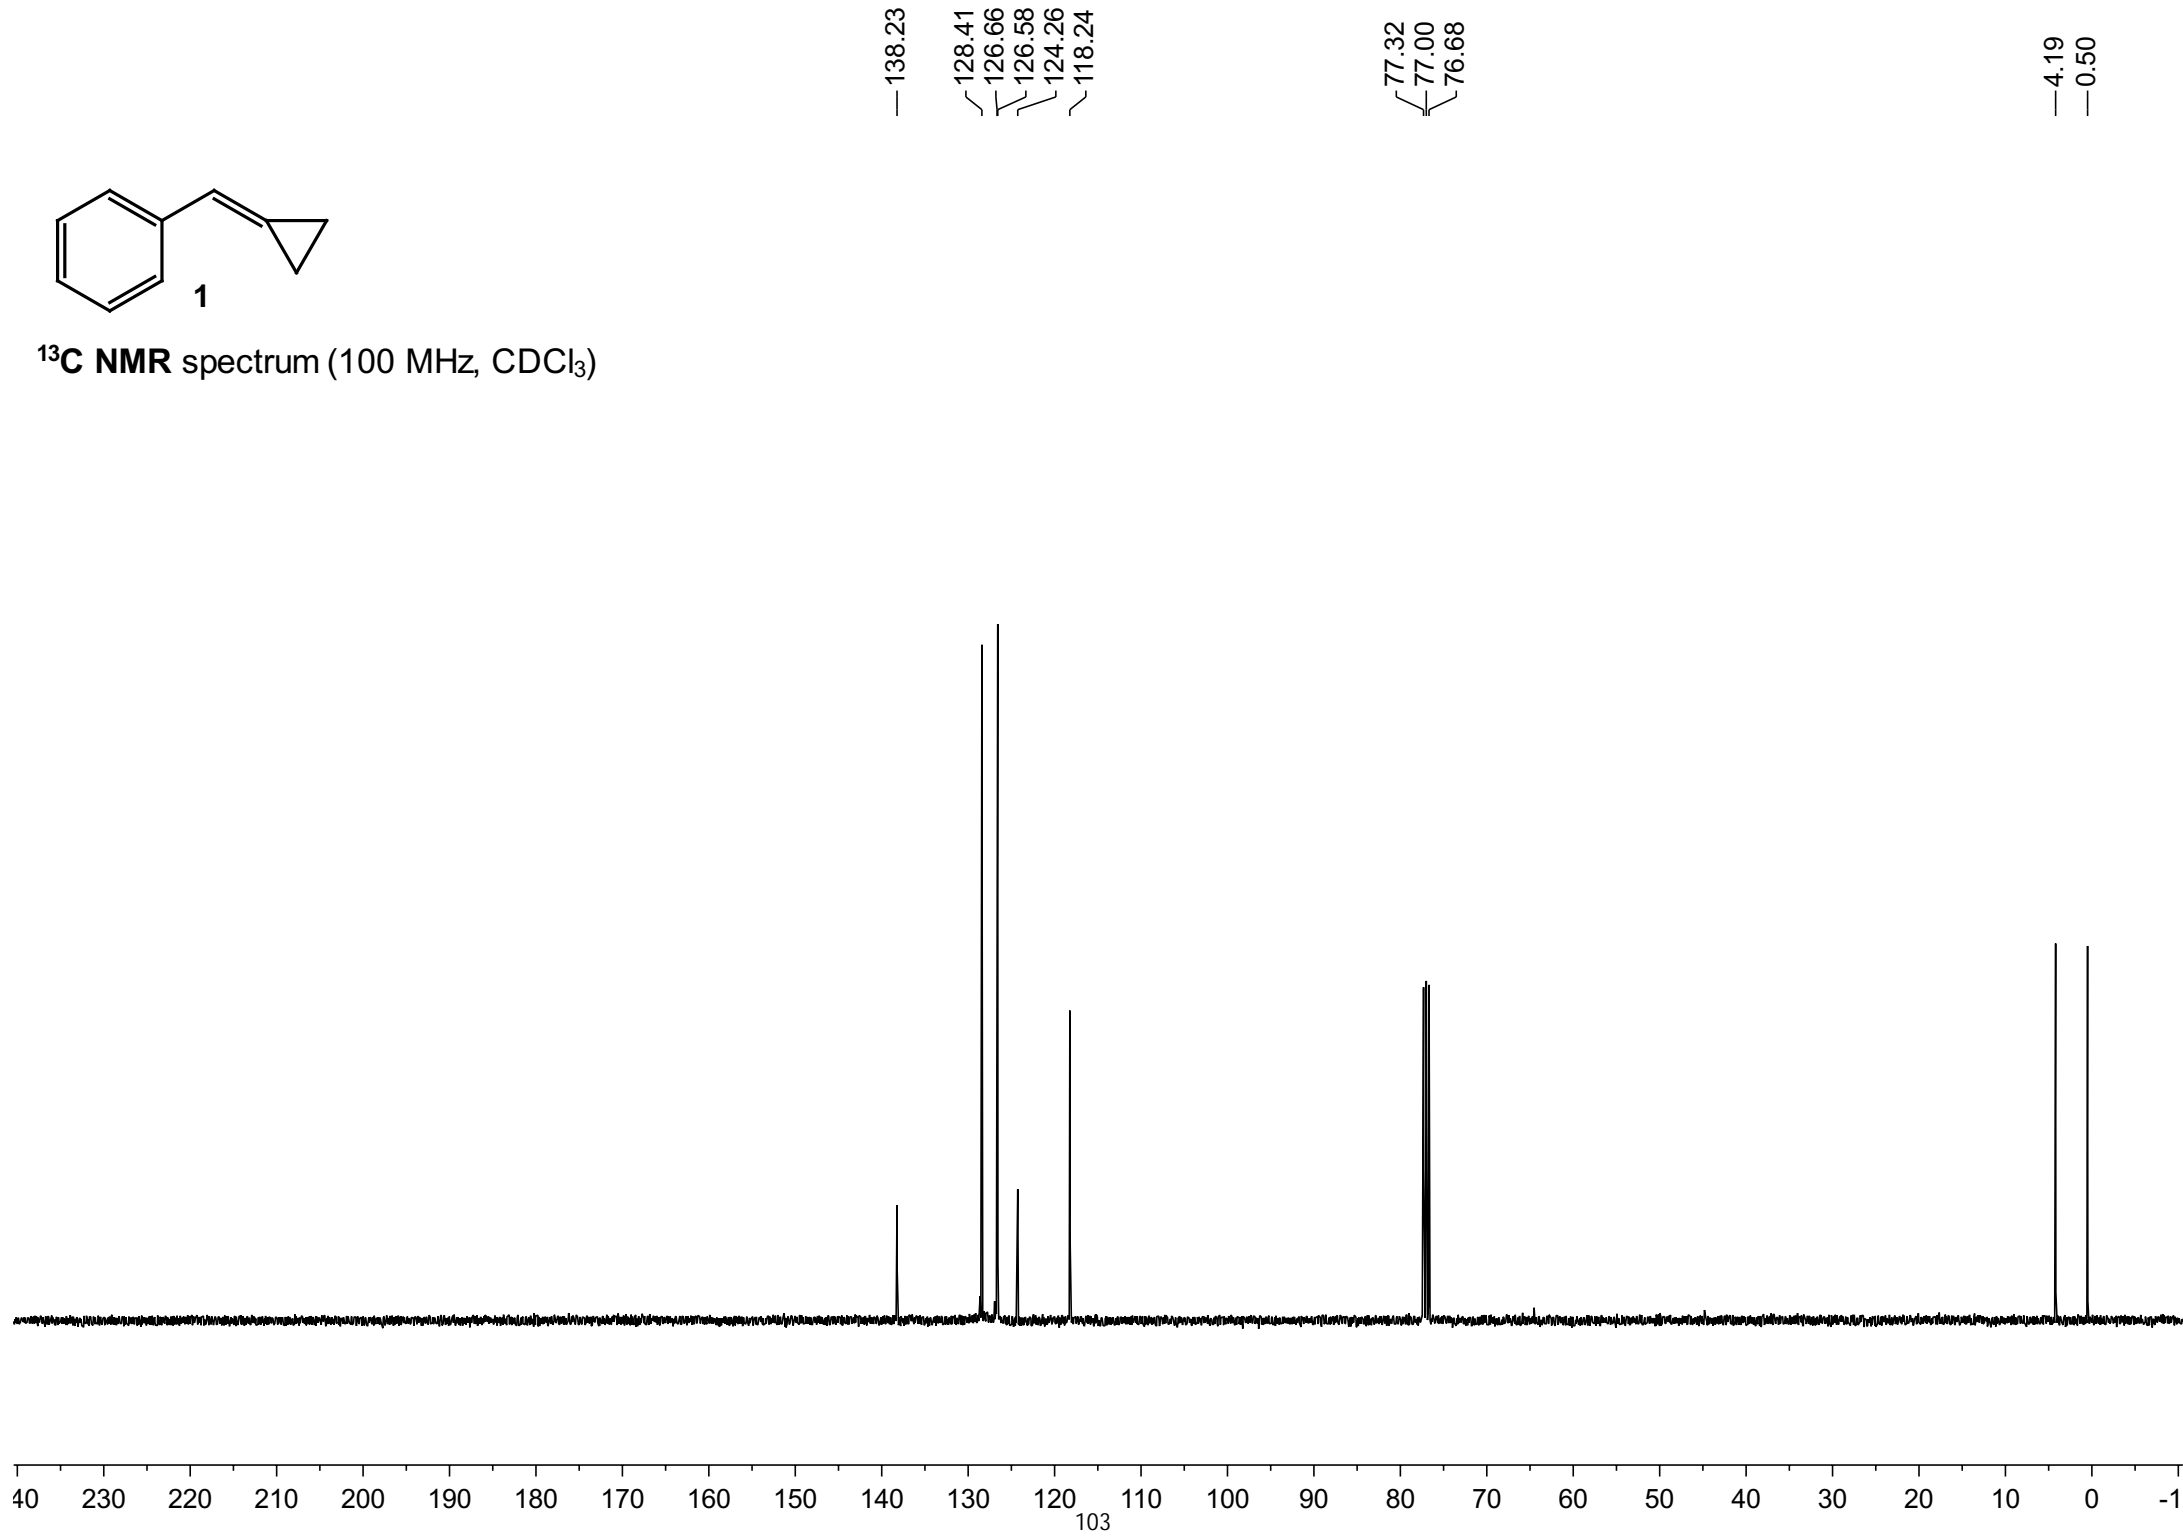

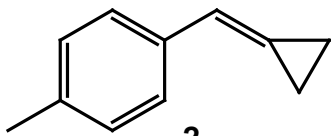

2

<sup>1</sup>H NMR spectrum (600 MHz, CDCl<sub>3</sub>)

7.425  
7.423  
7.415  
7.411  
7.223  
7.130  
7.117  
6.713  
6.710  
6.706

2.330

1.403  
1.399  
1.393  
1.390  
1.387  
1.383  
1.378  
1.374  
1.163  
1.160  
1.155  
1.151  
1.147  
1.144  
1.138  
1.135  
-0.000

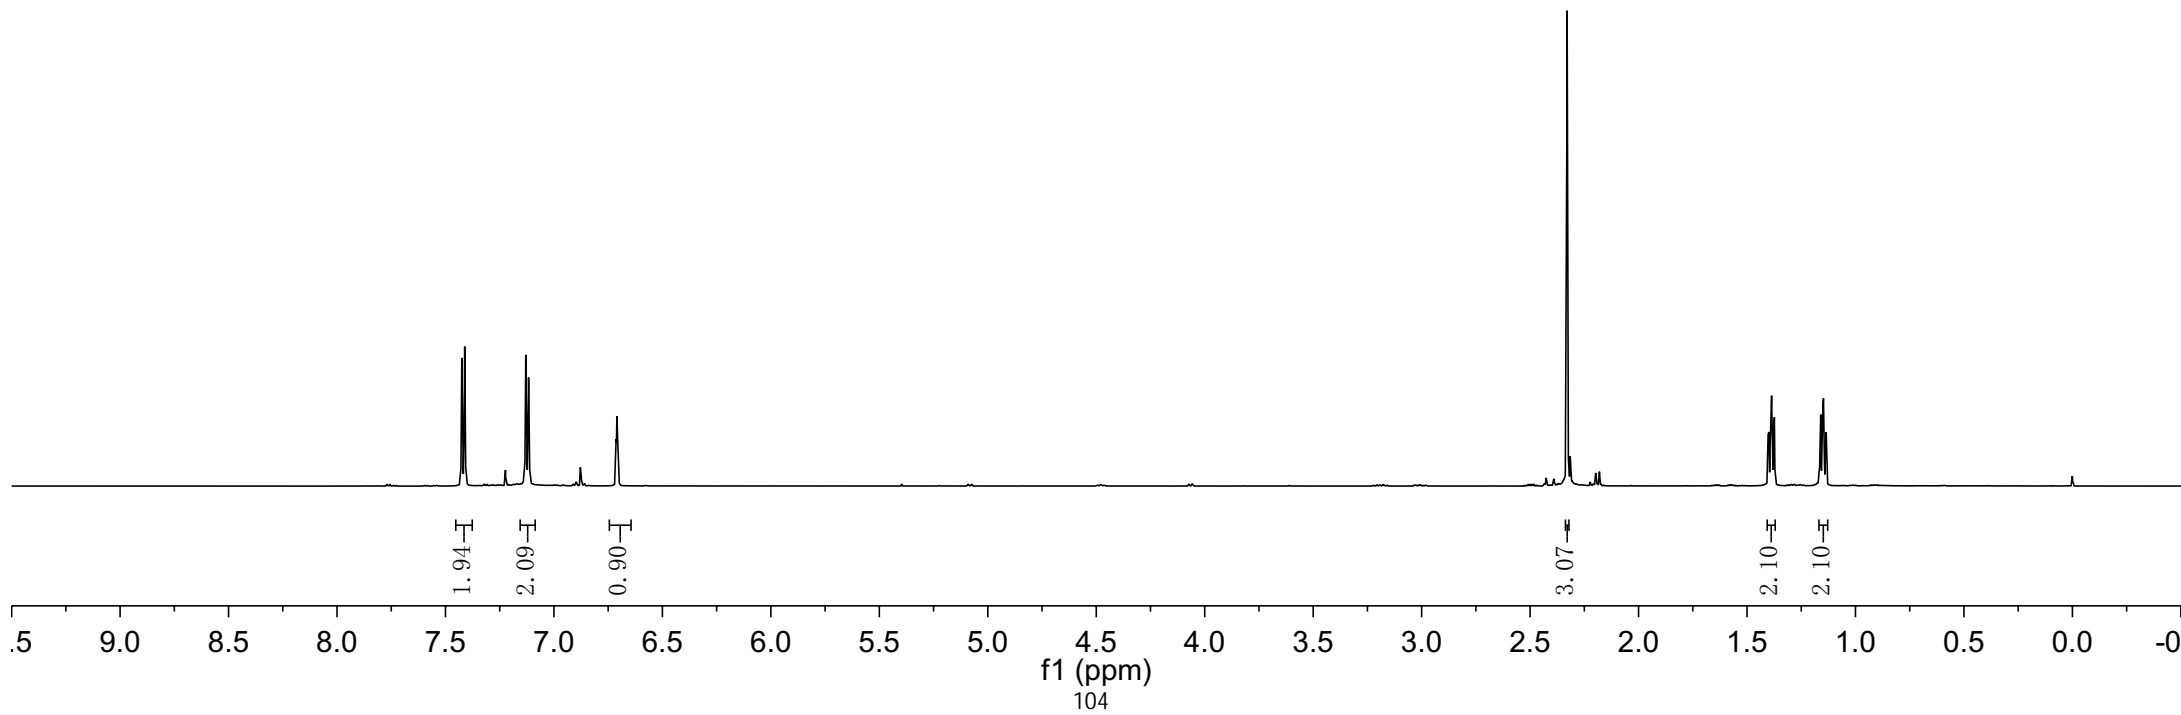

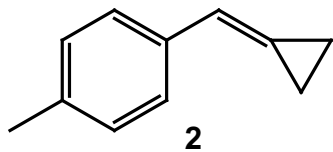

<sup>13</sup>C NMR spectrum (150 MHz, CDCl<sub>3</sub>)

136.34  
135.49  
129.12  
126.49  
123.03  
118.04

77.21  
77.00  
76.79

21.16

4.10  
0.46

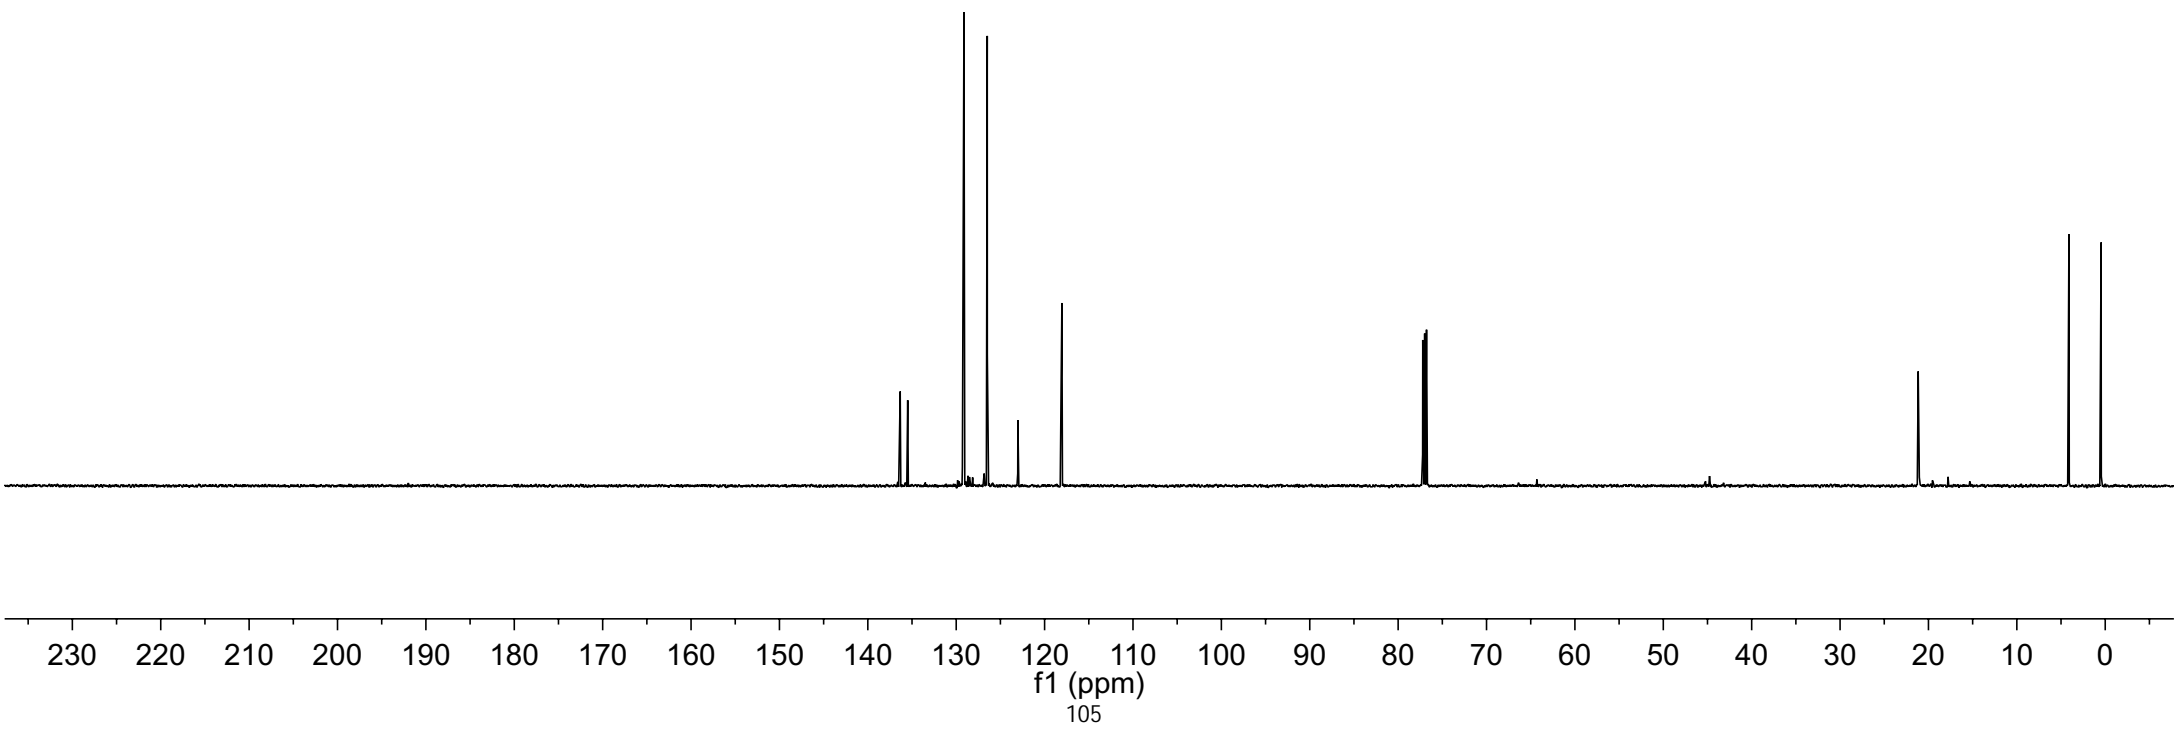

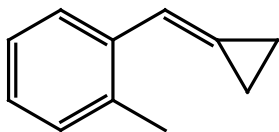

3

<sup>1</sup>H NMR spectrum (400 MHz, CDCl<sub>3</sub>)

7.738  
7.718  
7.177  
7.172  
7.160  
7.155  
7.152  
7.143  
7.139  
7.136  
7.131  
7.126  
7.124  
7.120  
7.113  
7.109  
7.095  
7.092  
7.090  
7.077  
7.073  
6.959  
6.954  
6.949  
6.943  
6.938

2.376

1.405  
1.404  
1.399  
1.398  
1.389  
1.387  
1.384  
1.380  
1.374  
1.366  
1.360  
1.180  
1.175  
1.167  
1.161  
1.156  
1.152  
1.141  
1.137  
0.000

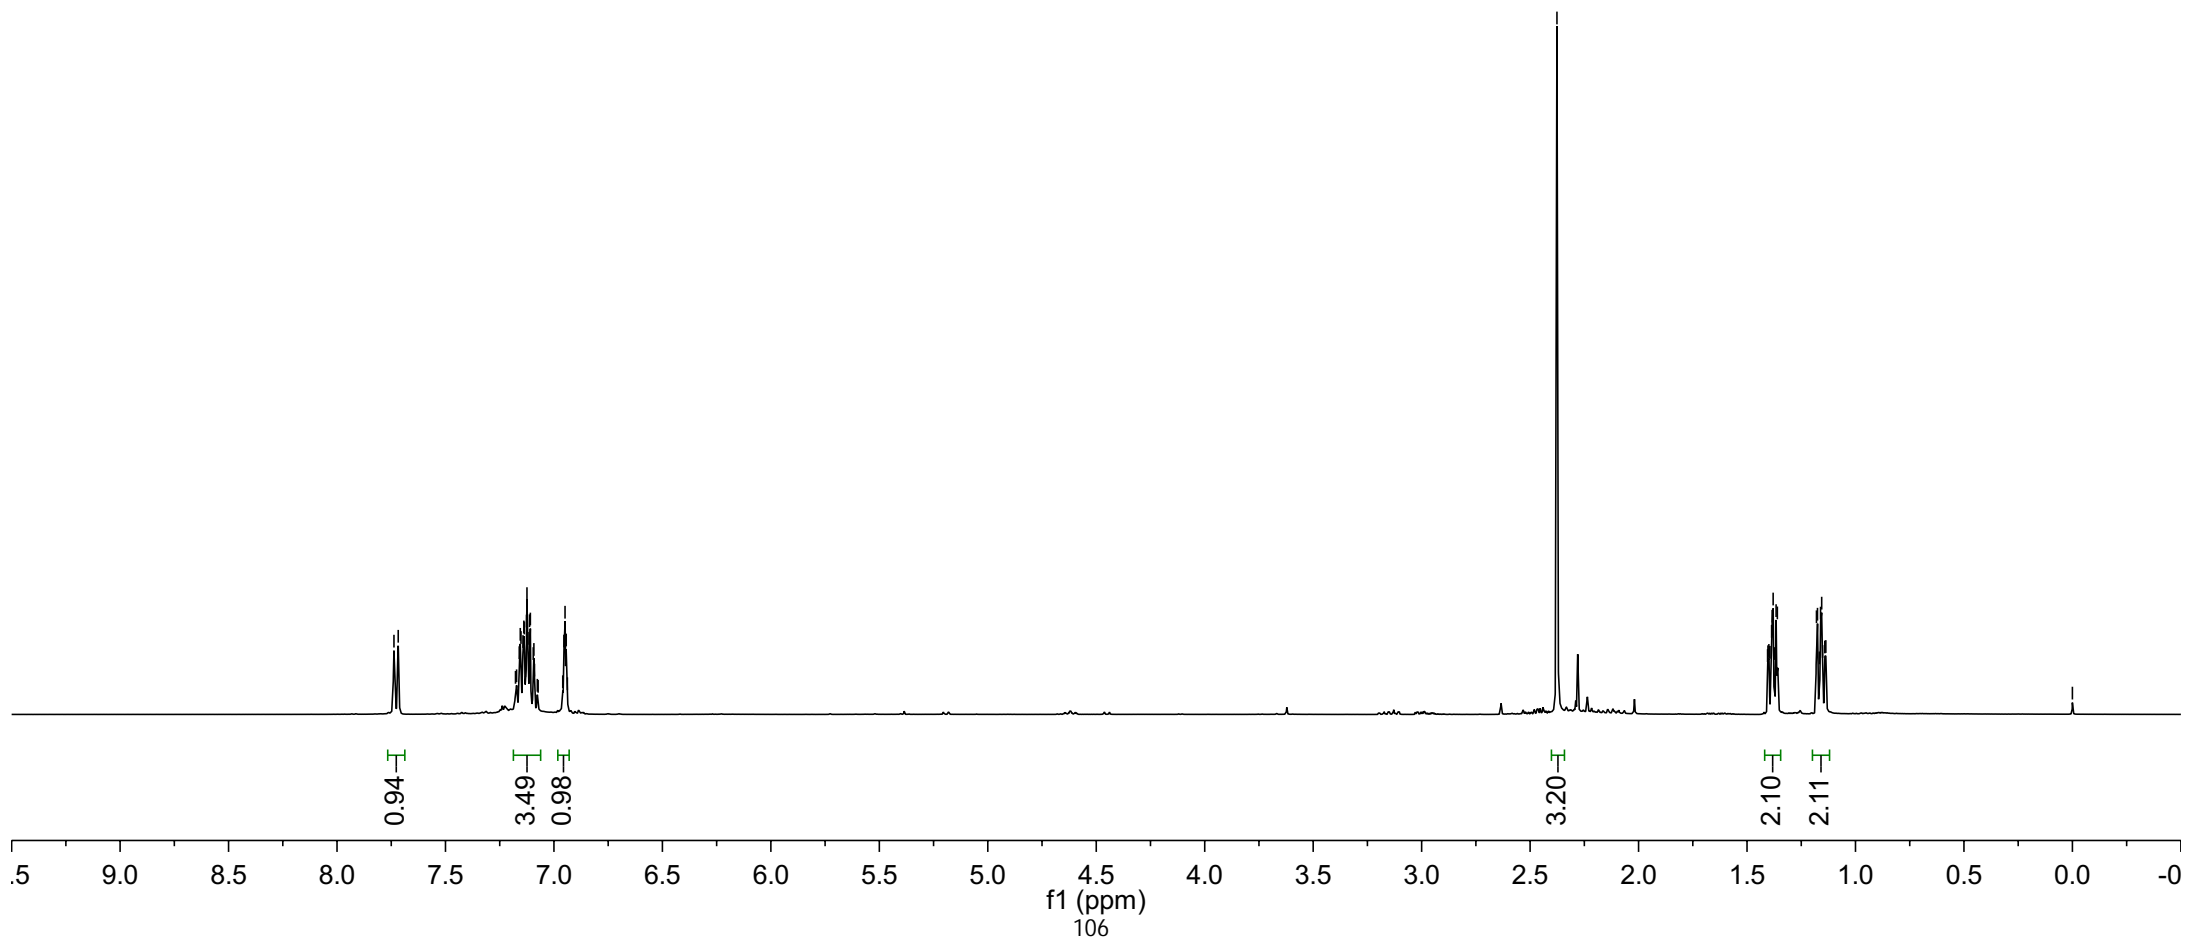



**3**

<sup>13</sup>C NMR spectrum (100 MHz, CDCl<sub>3</sub>)

136.49  
134.82  
130.24  
126.57  
125.82  
125.77  
124.87

115.45

77.32  
77.00  
76.68

19.69

4.08  
0.80

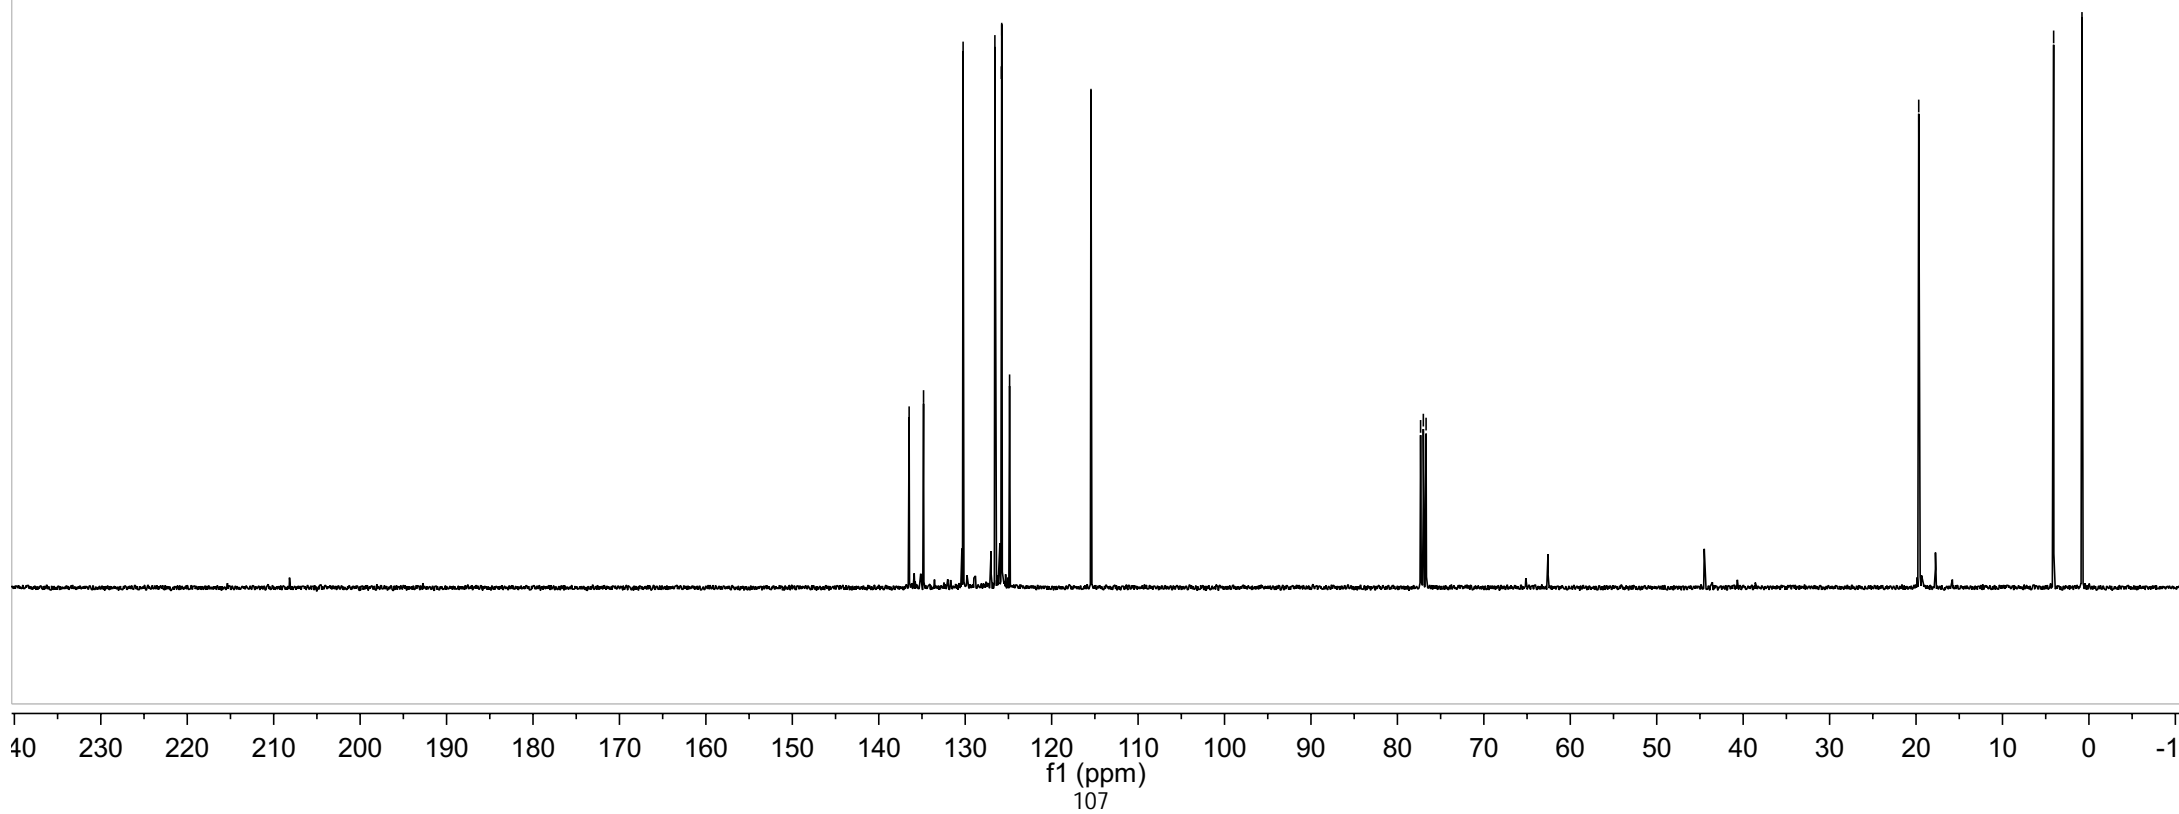



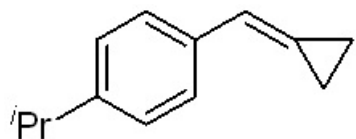

4

<sup>1</sup>H NMR spectrum (600 MHz, CDCl<sub>3</sub>)

7.466  
7.452  
7.231  
7.193  
7.179  
6.722  
6.719

2.923  
2.912  
2.900  
2.889  
2.877  
2.866  
2.854  
1.407  
1.404  
1.394  
1.391  
1.387  
1.382  
1.378  
1.252  
1.241  
1.167  
1.164  
1.154  
1.152  
1.142  
1.139  
-0.000

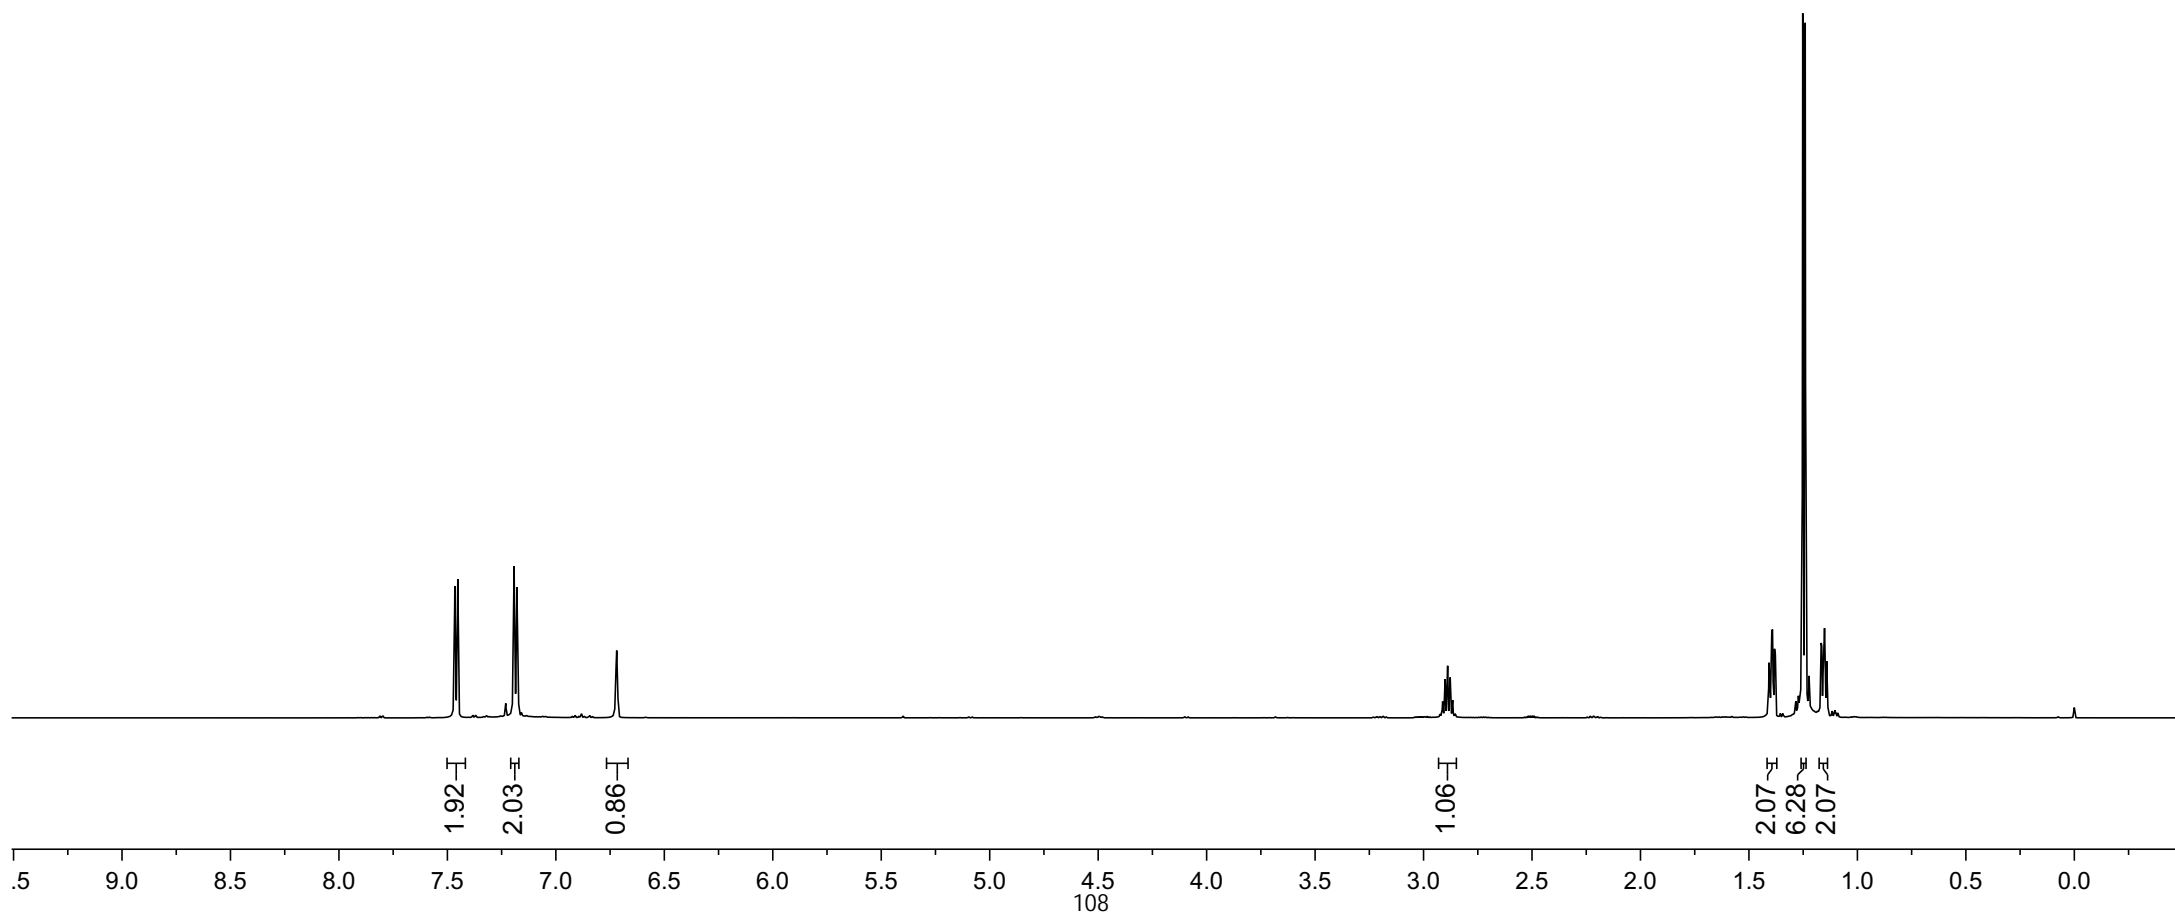



4

<sup>13</sup>C NMR spectrum (150 MHz, CDCl<sub>3</sub>)

— 147.41

— 135.92

— 126.55

— 126.49

— 123.16

— 118.02

— 77.21

— 77.00

— 76.79

— 33.83

— 23.97

— 4.11

— 0.49

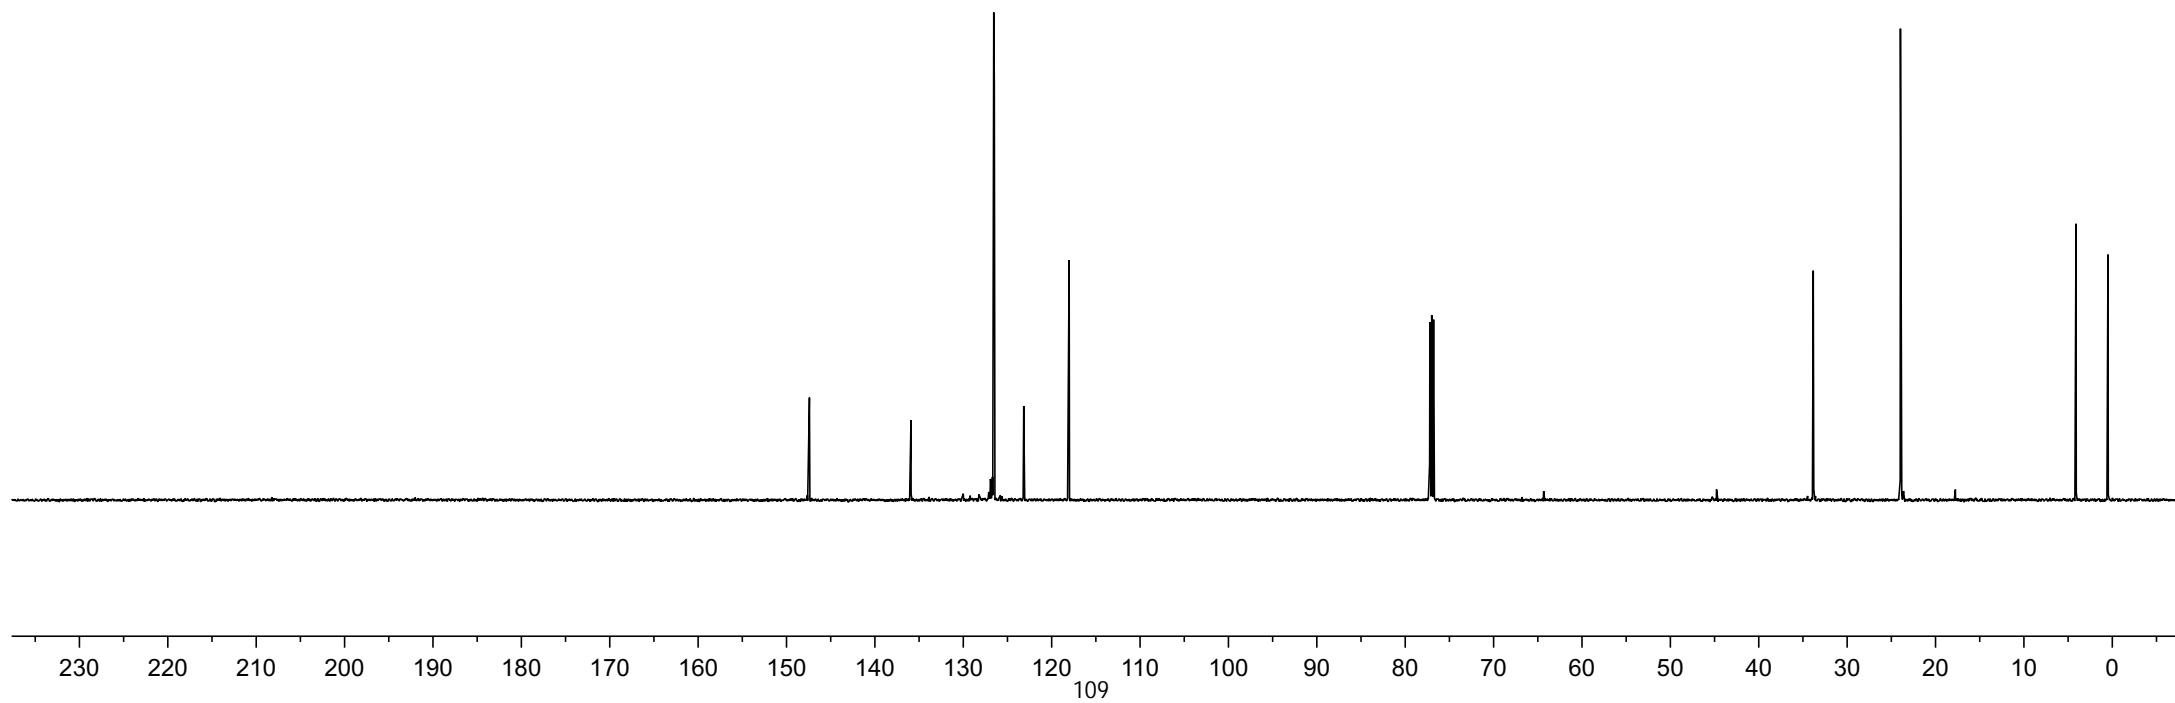

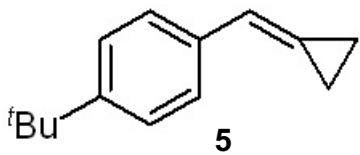

<sup>1</sup>H NMR spectrum (600 MHz, CDCl<sub>3</sub>)

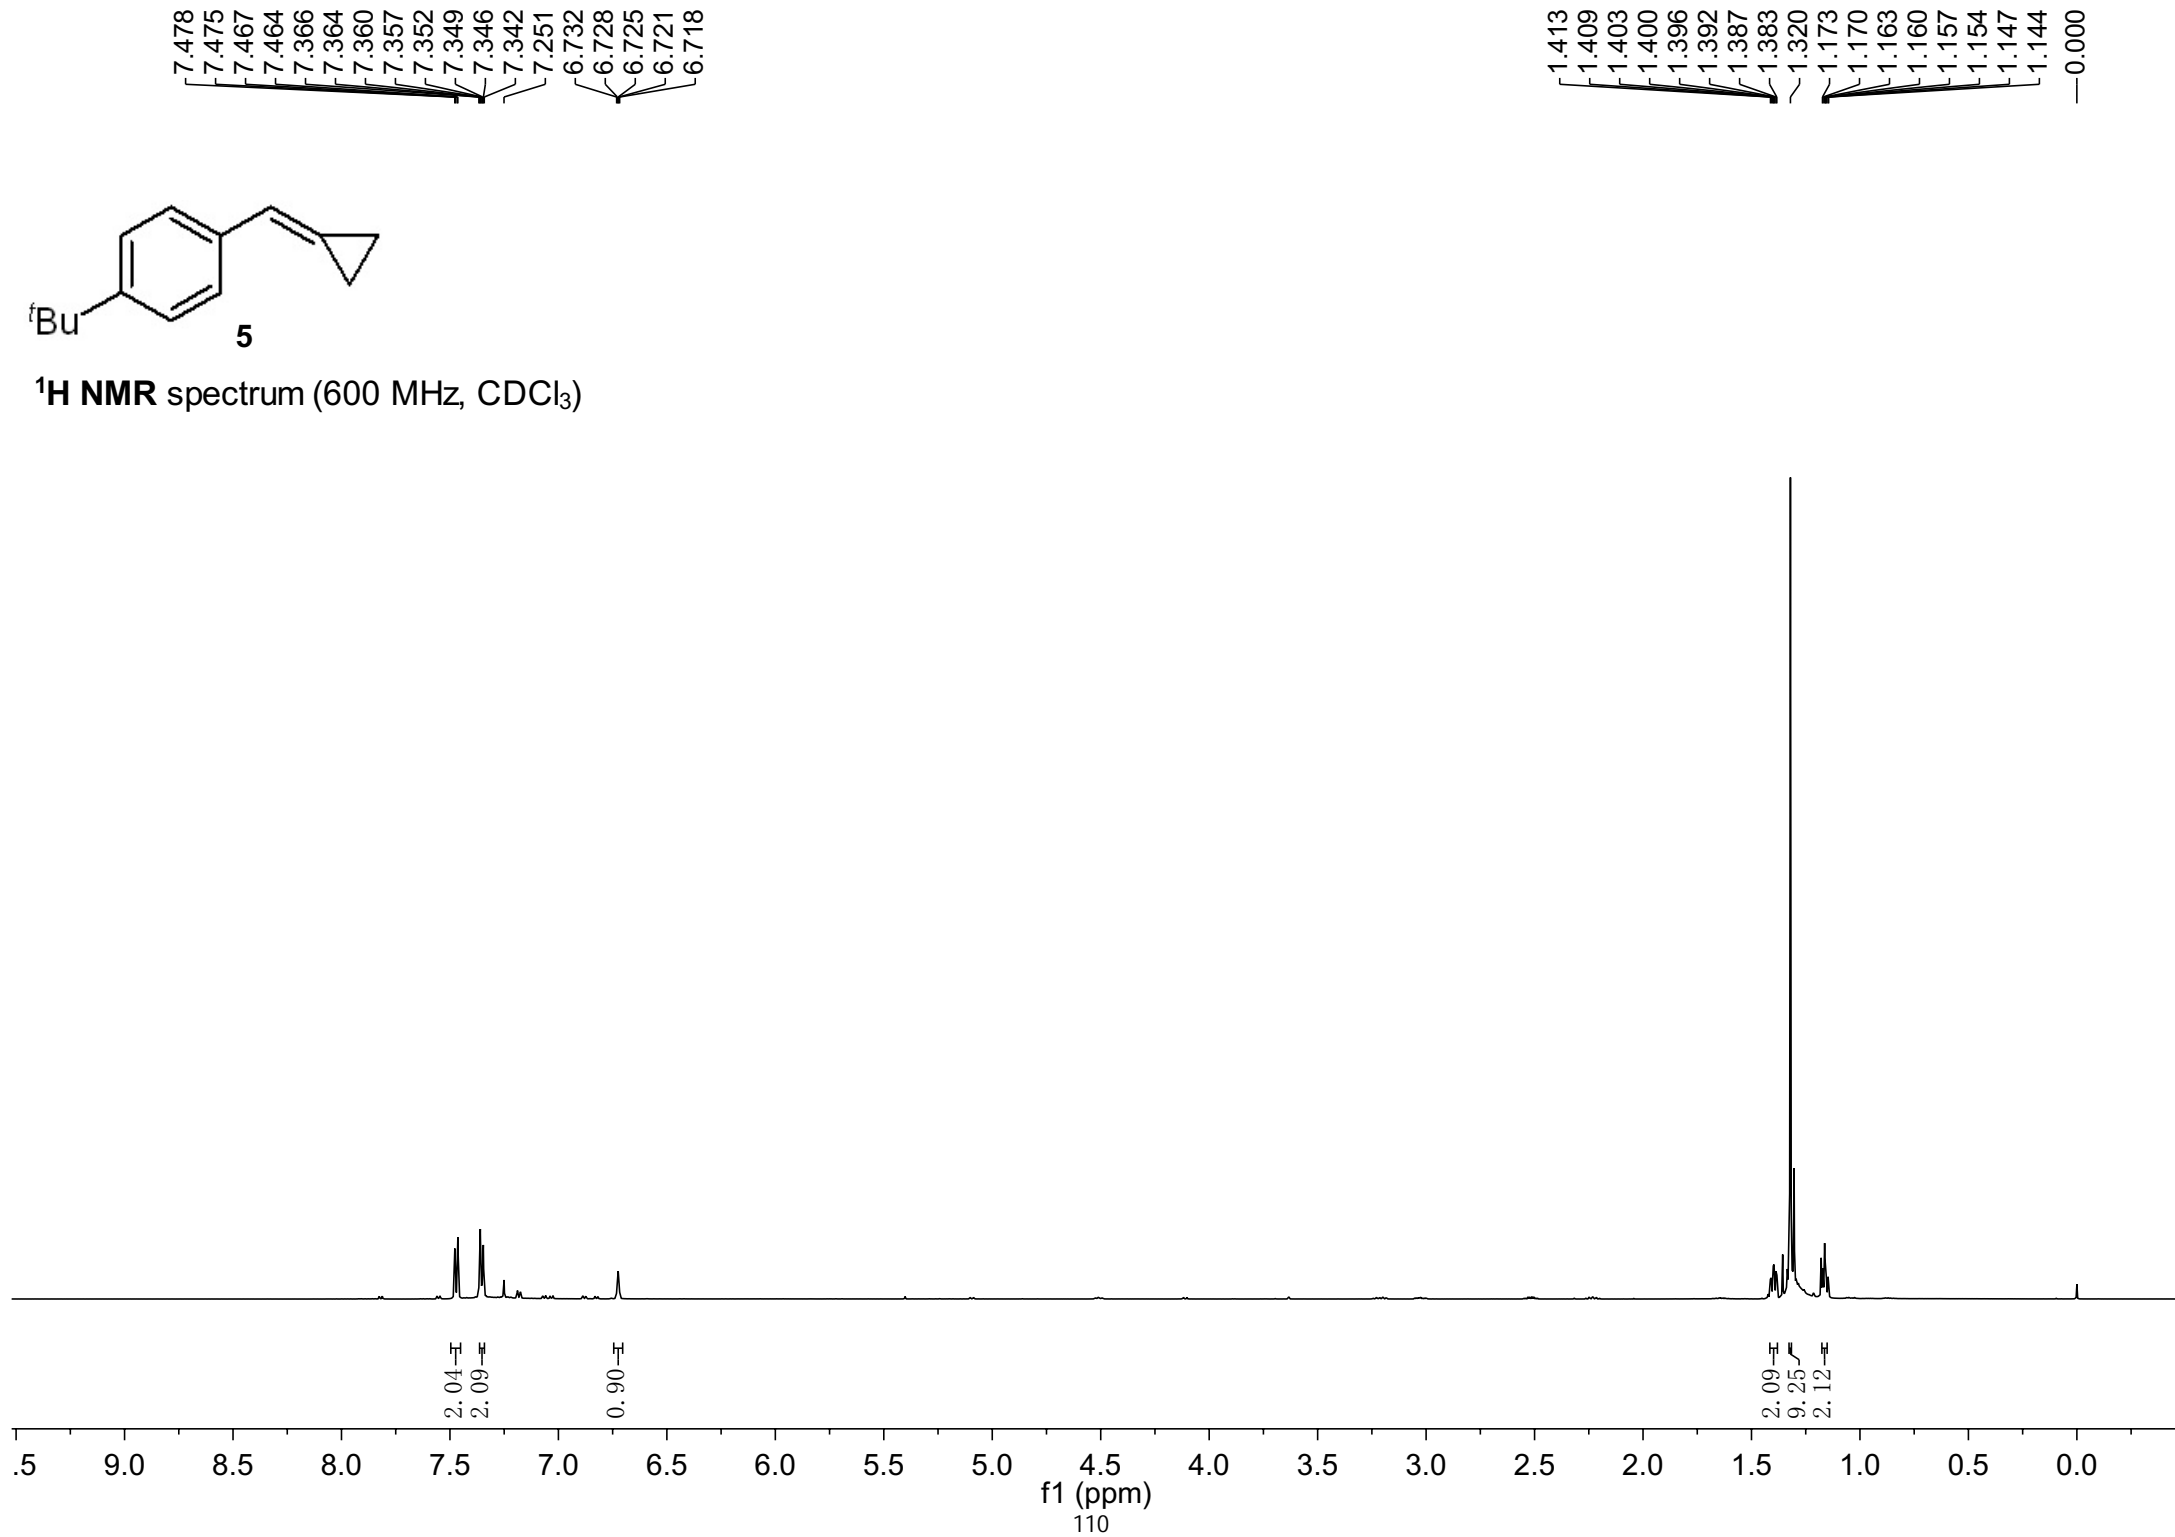

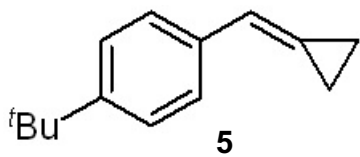

<sup>13</sup>C NMR spectrum (150 MHz, CDCl<sub>3</sub>)

— 149.63

— 135.53

~ 126.29

~ 125.34

~ 123.33

~ 117.90

77.21

77.00

76.79

— 34.50

— 31.32

— 4.10

— 0.50

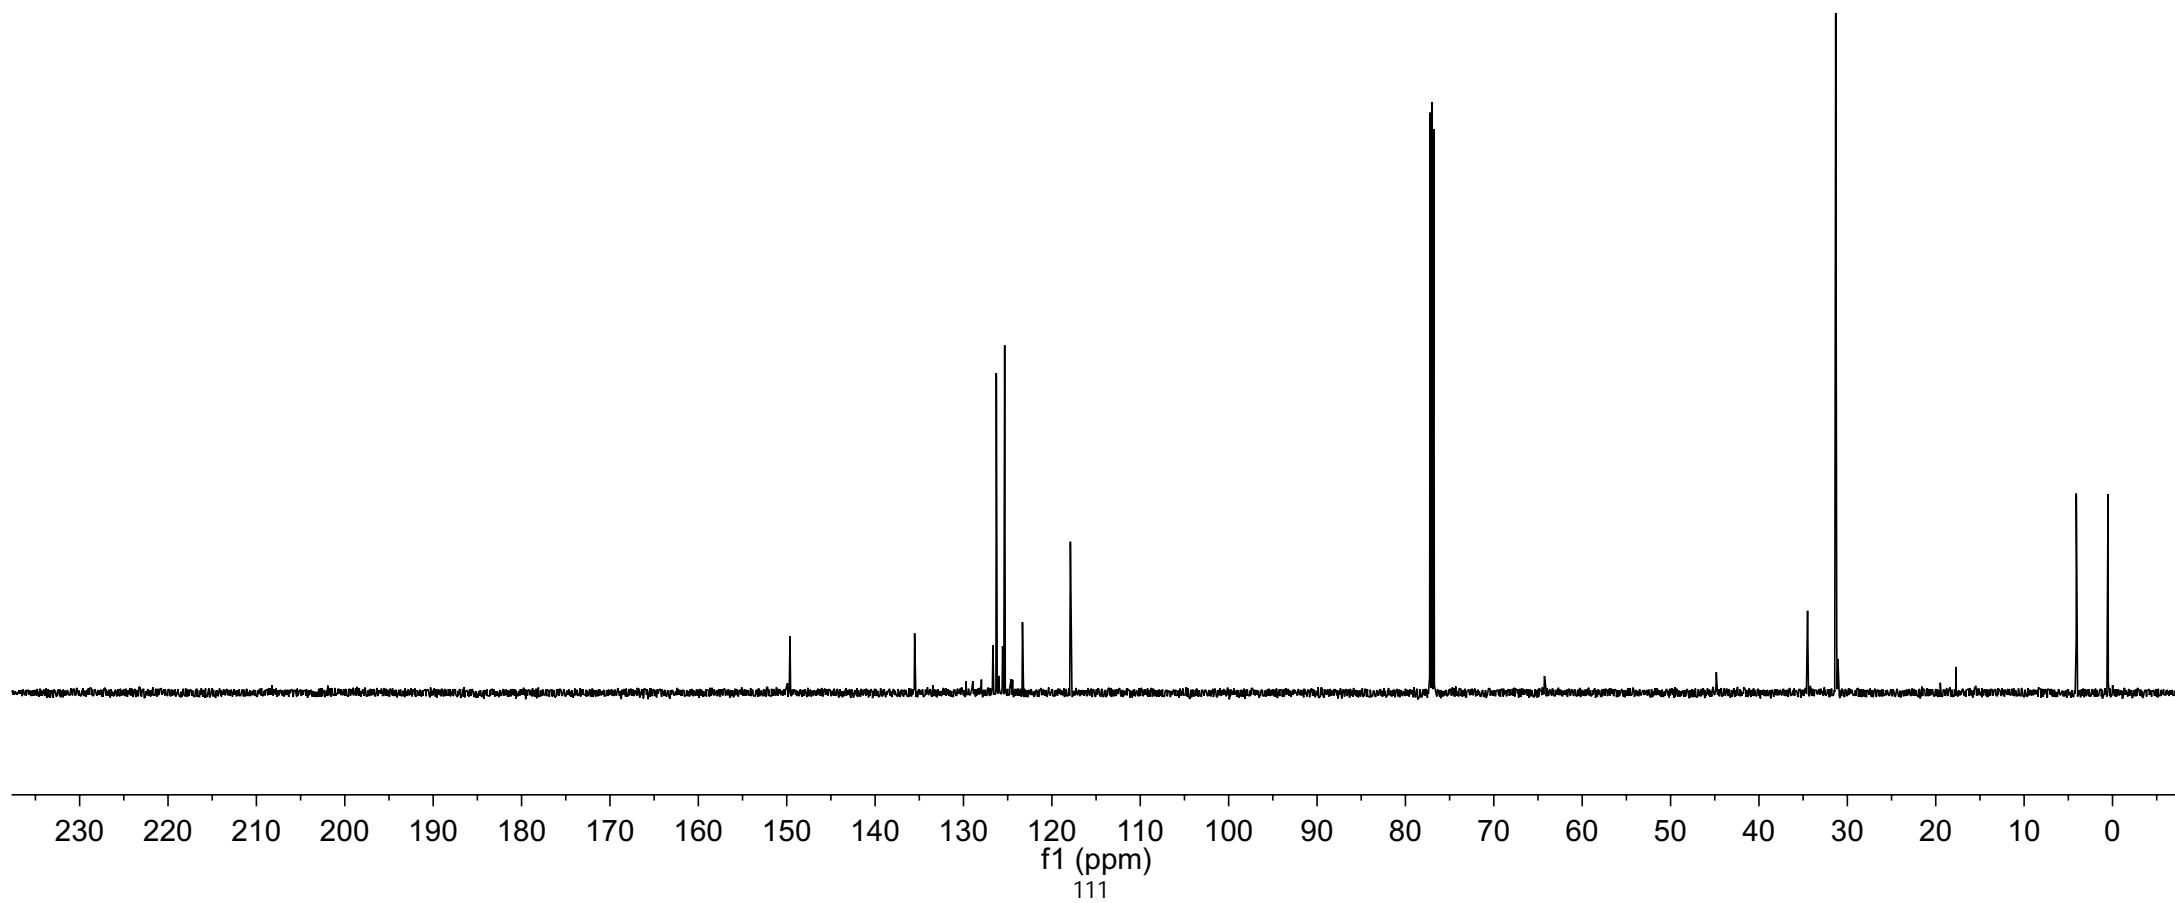

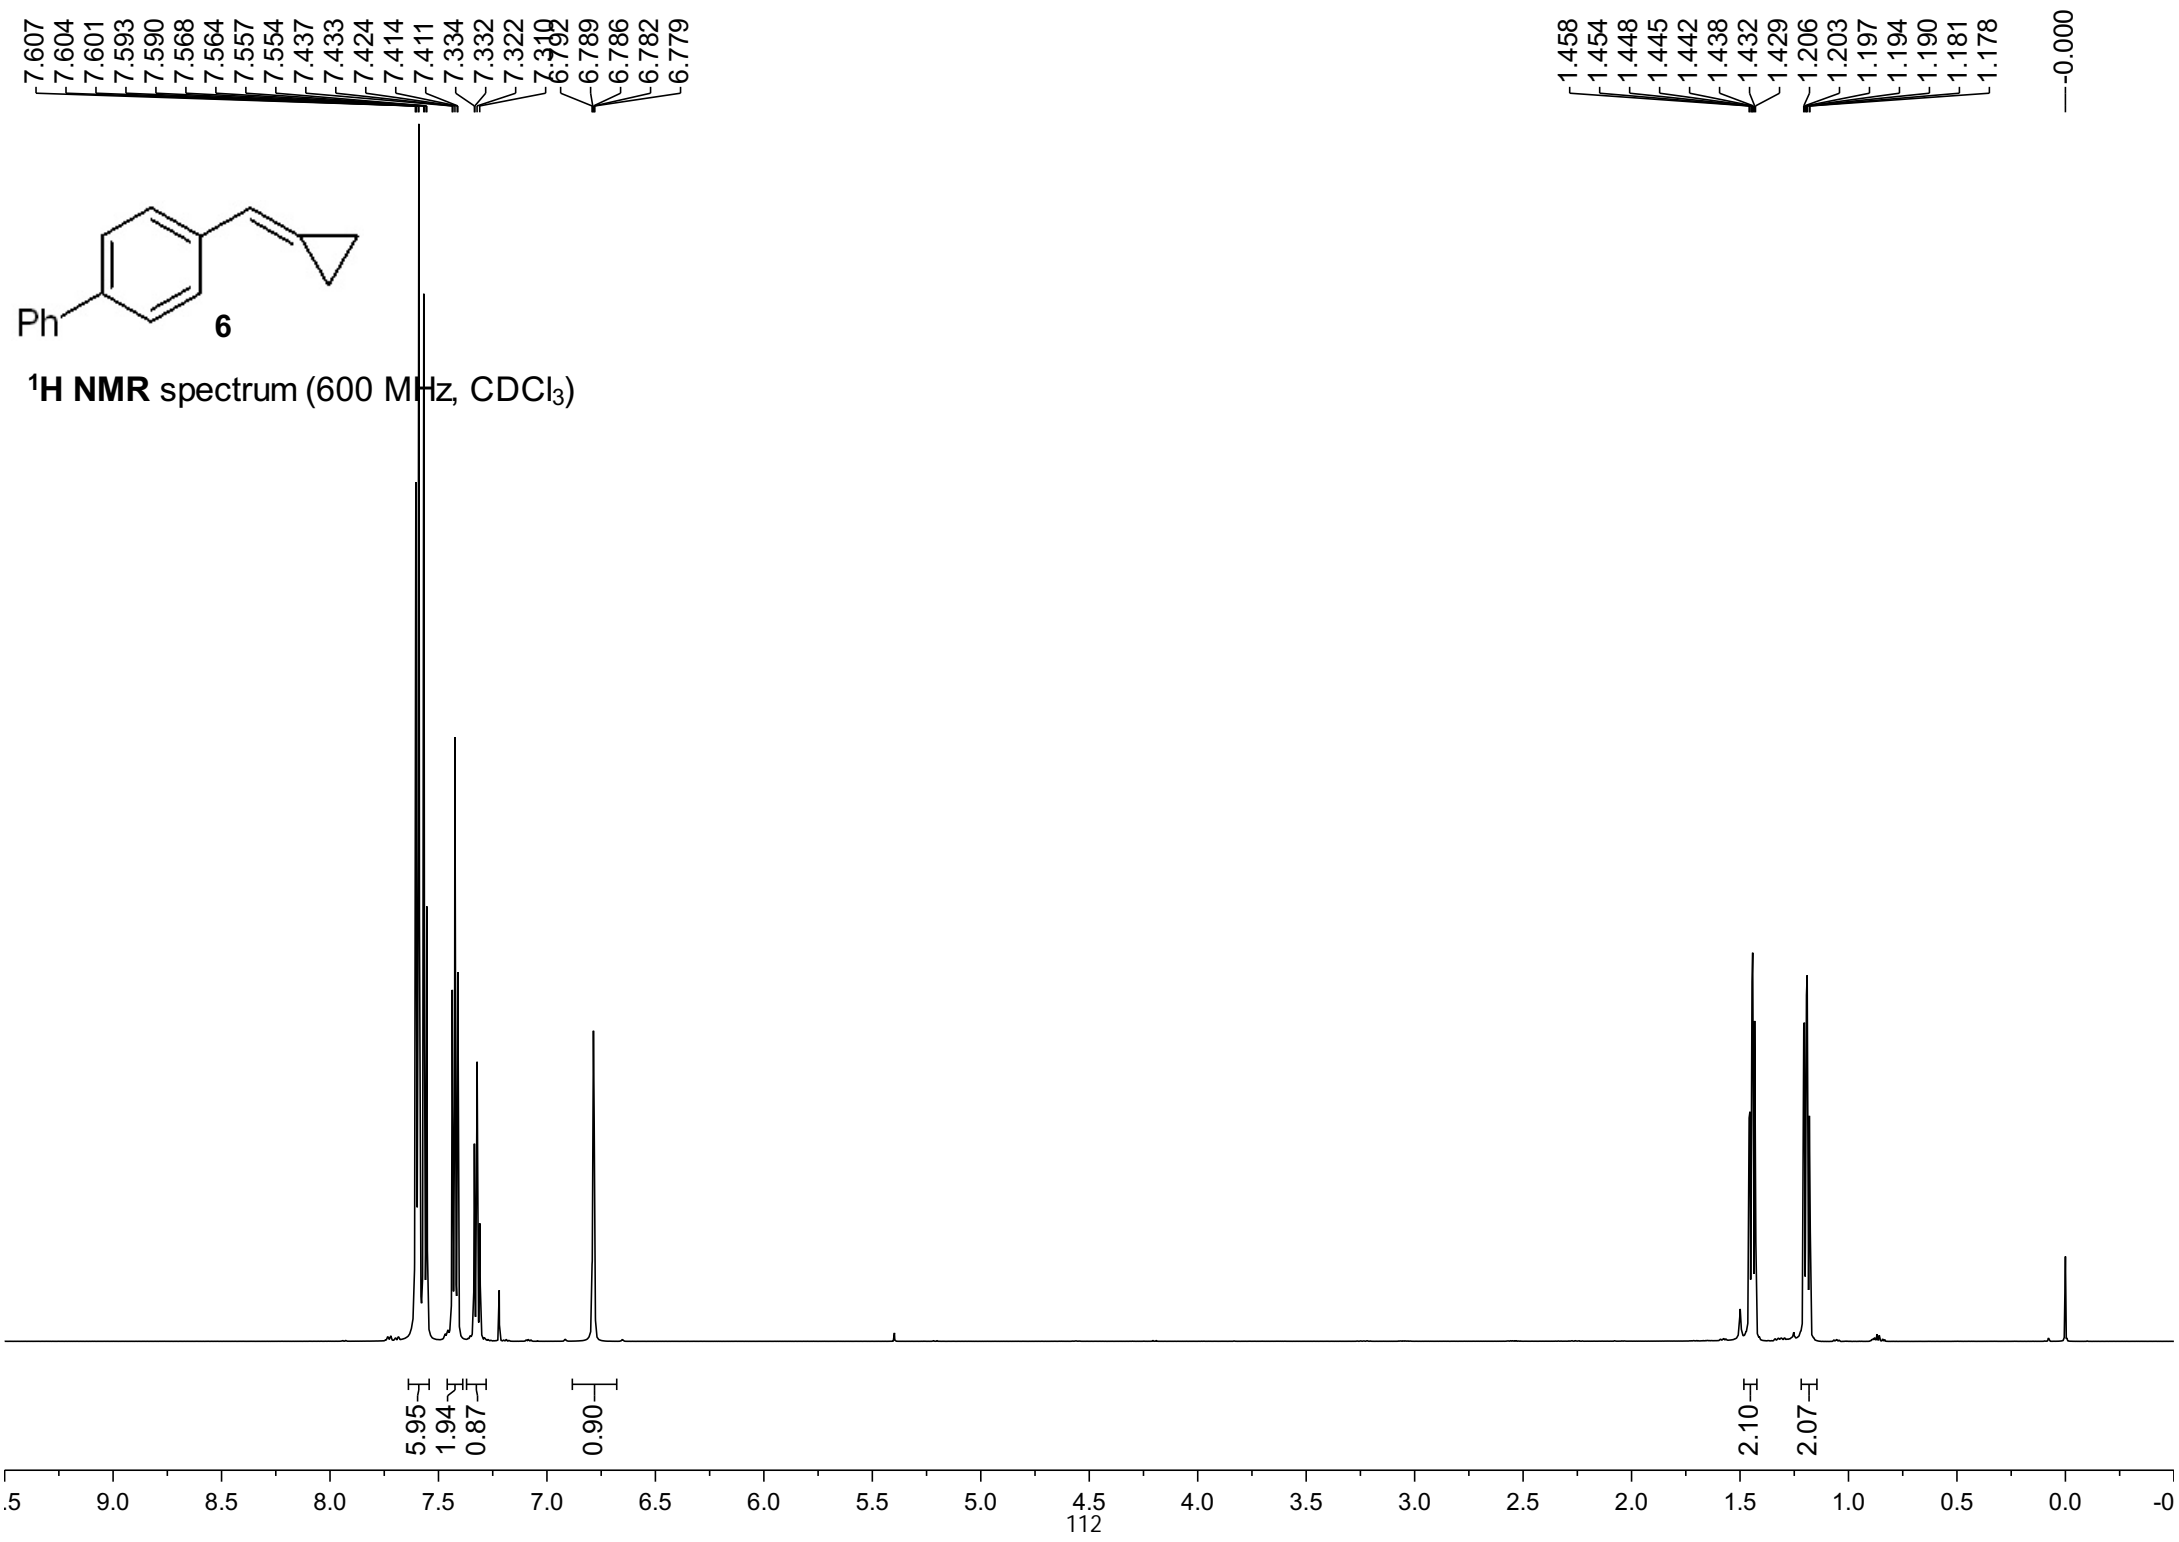

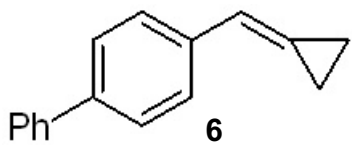

<sup>13</sup>C NMR spectrum (150 MHz, CDCl<sub>3</sub>)

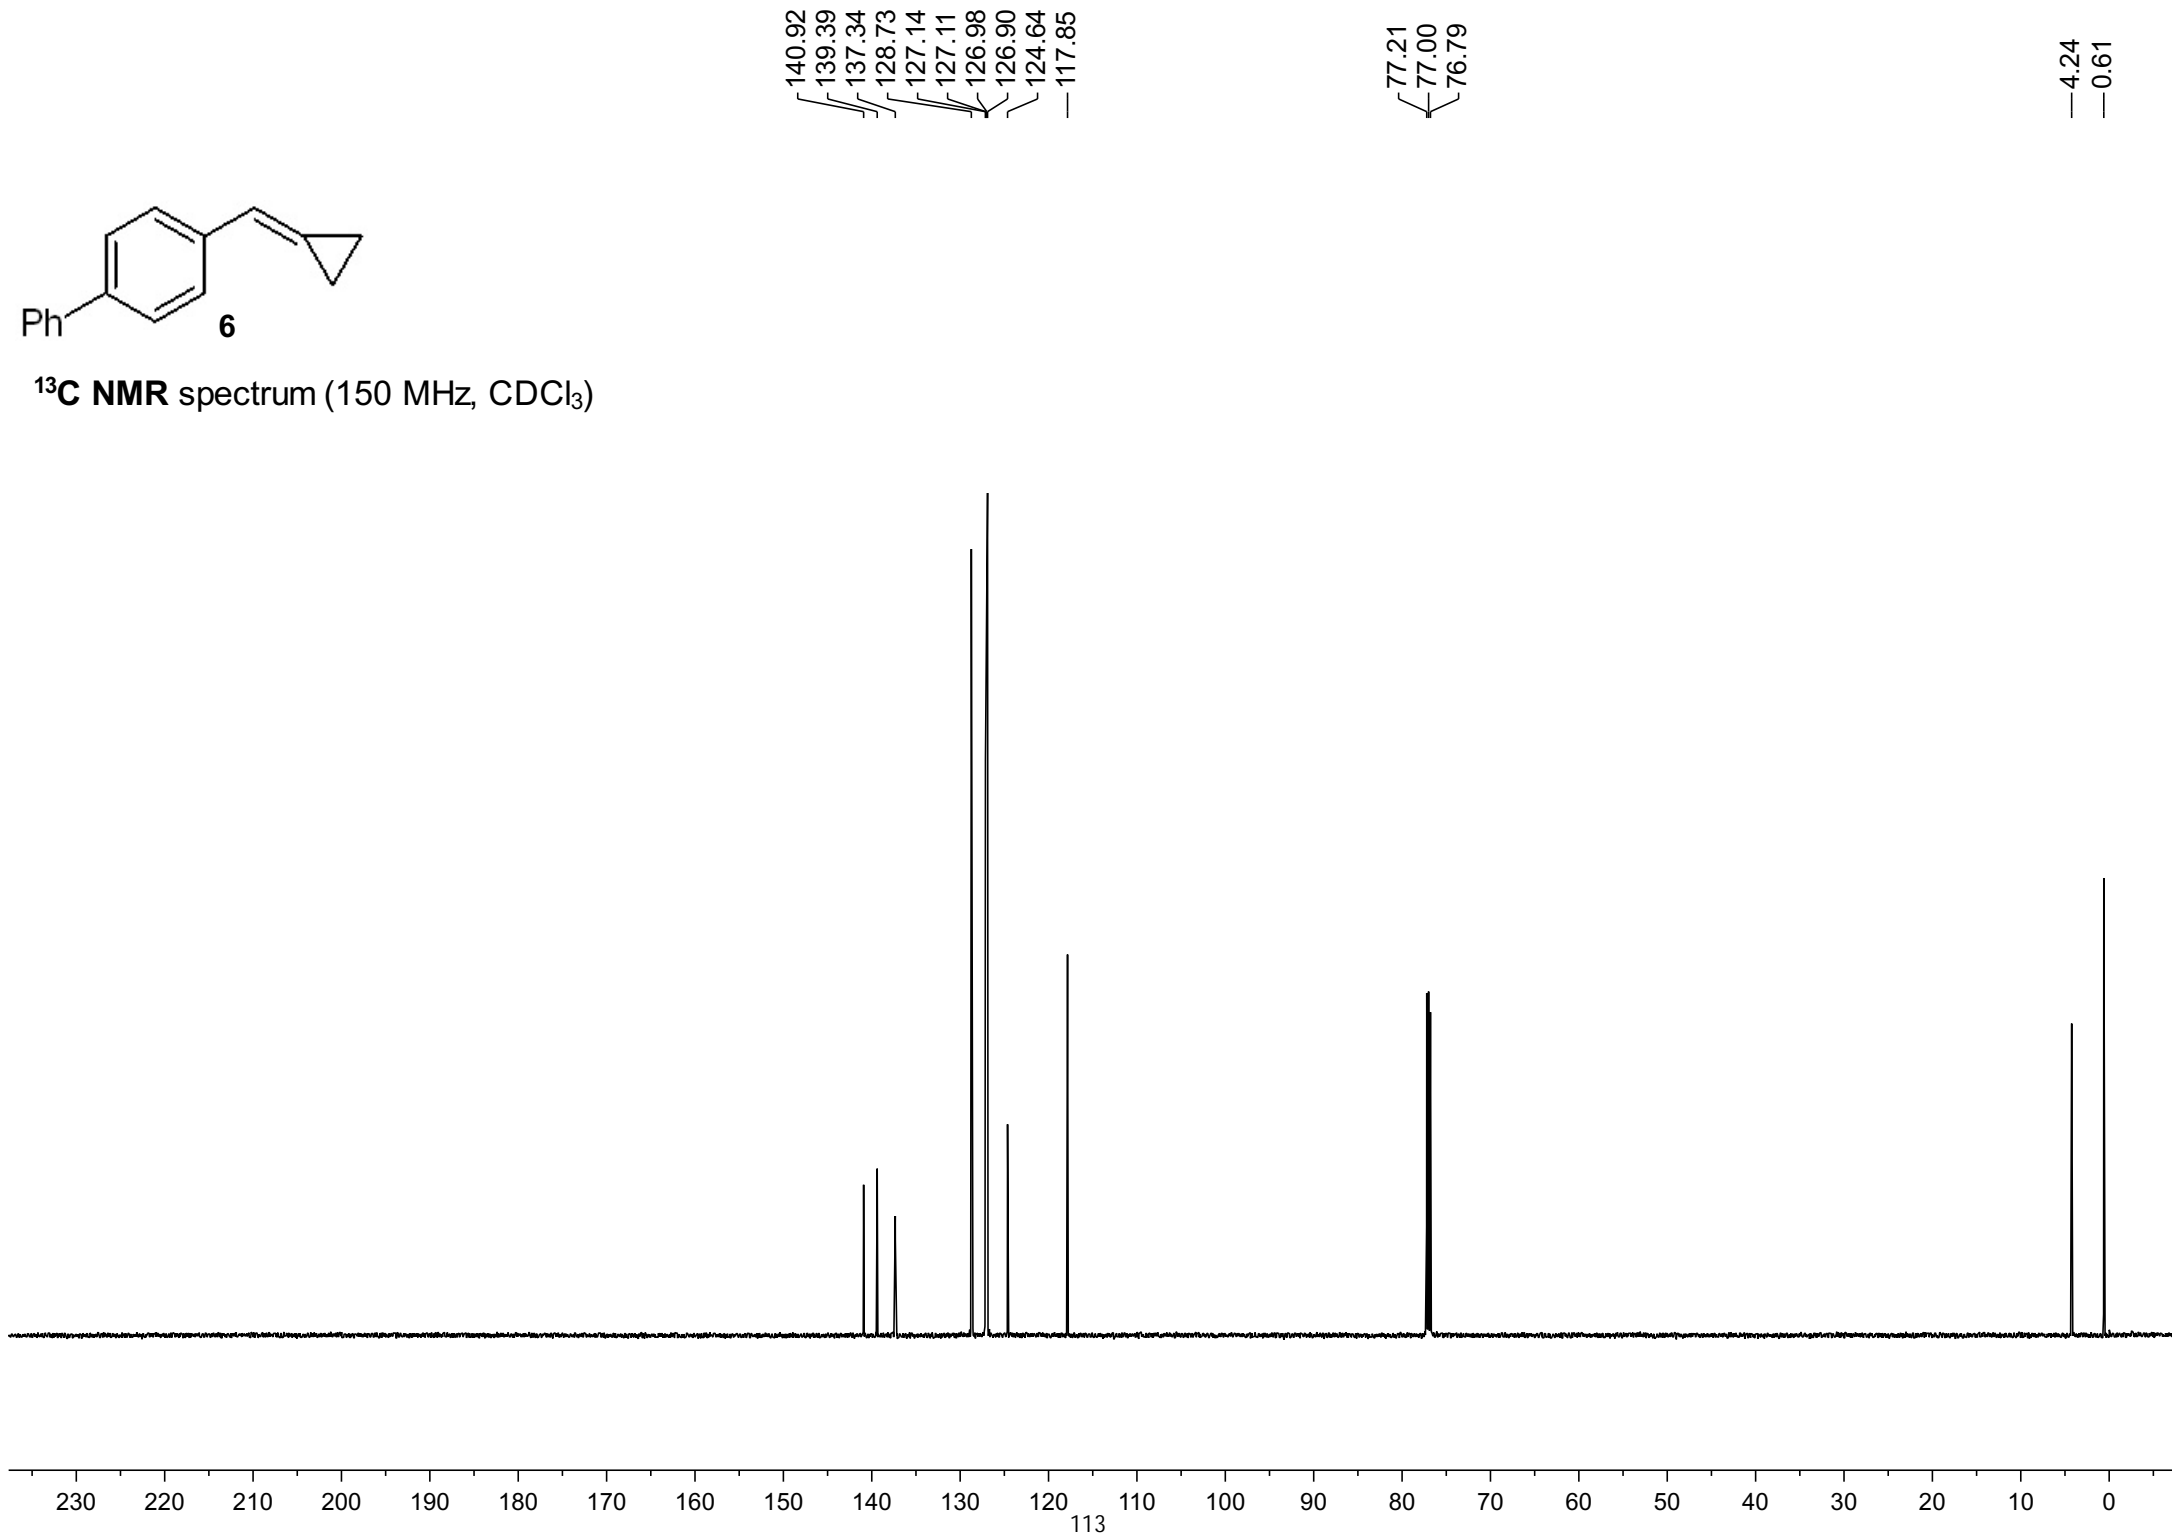

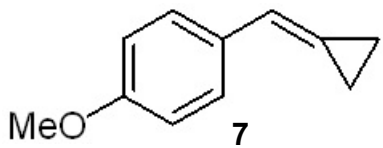

<sup>1</sup>H NMR spectrum (400 MHz, CDCl<sub>3</sub>)

7.456  
7.435  
6.867  
6.860  
6.855  
6.843  
6.838  
6.831  
6.681  
6.676  
6.671

3.766

1.378  
1.372  
1.358  
1.354  
1.348  
1.340  
1.335  
1.150  
1.145  
1.136  
1.131  
1.127  
1.112  
1.108

-0.000

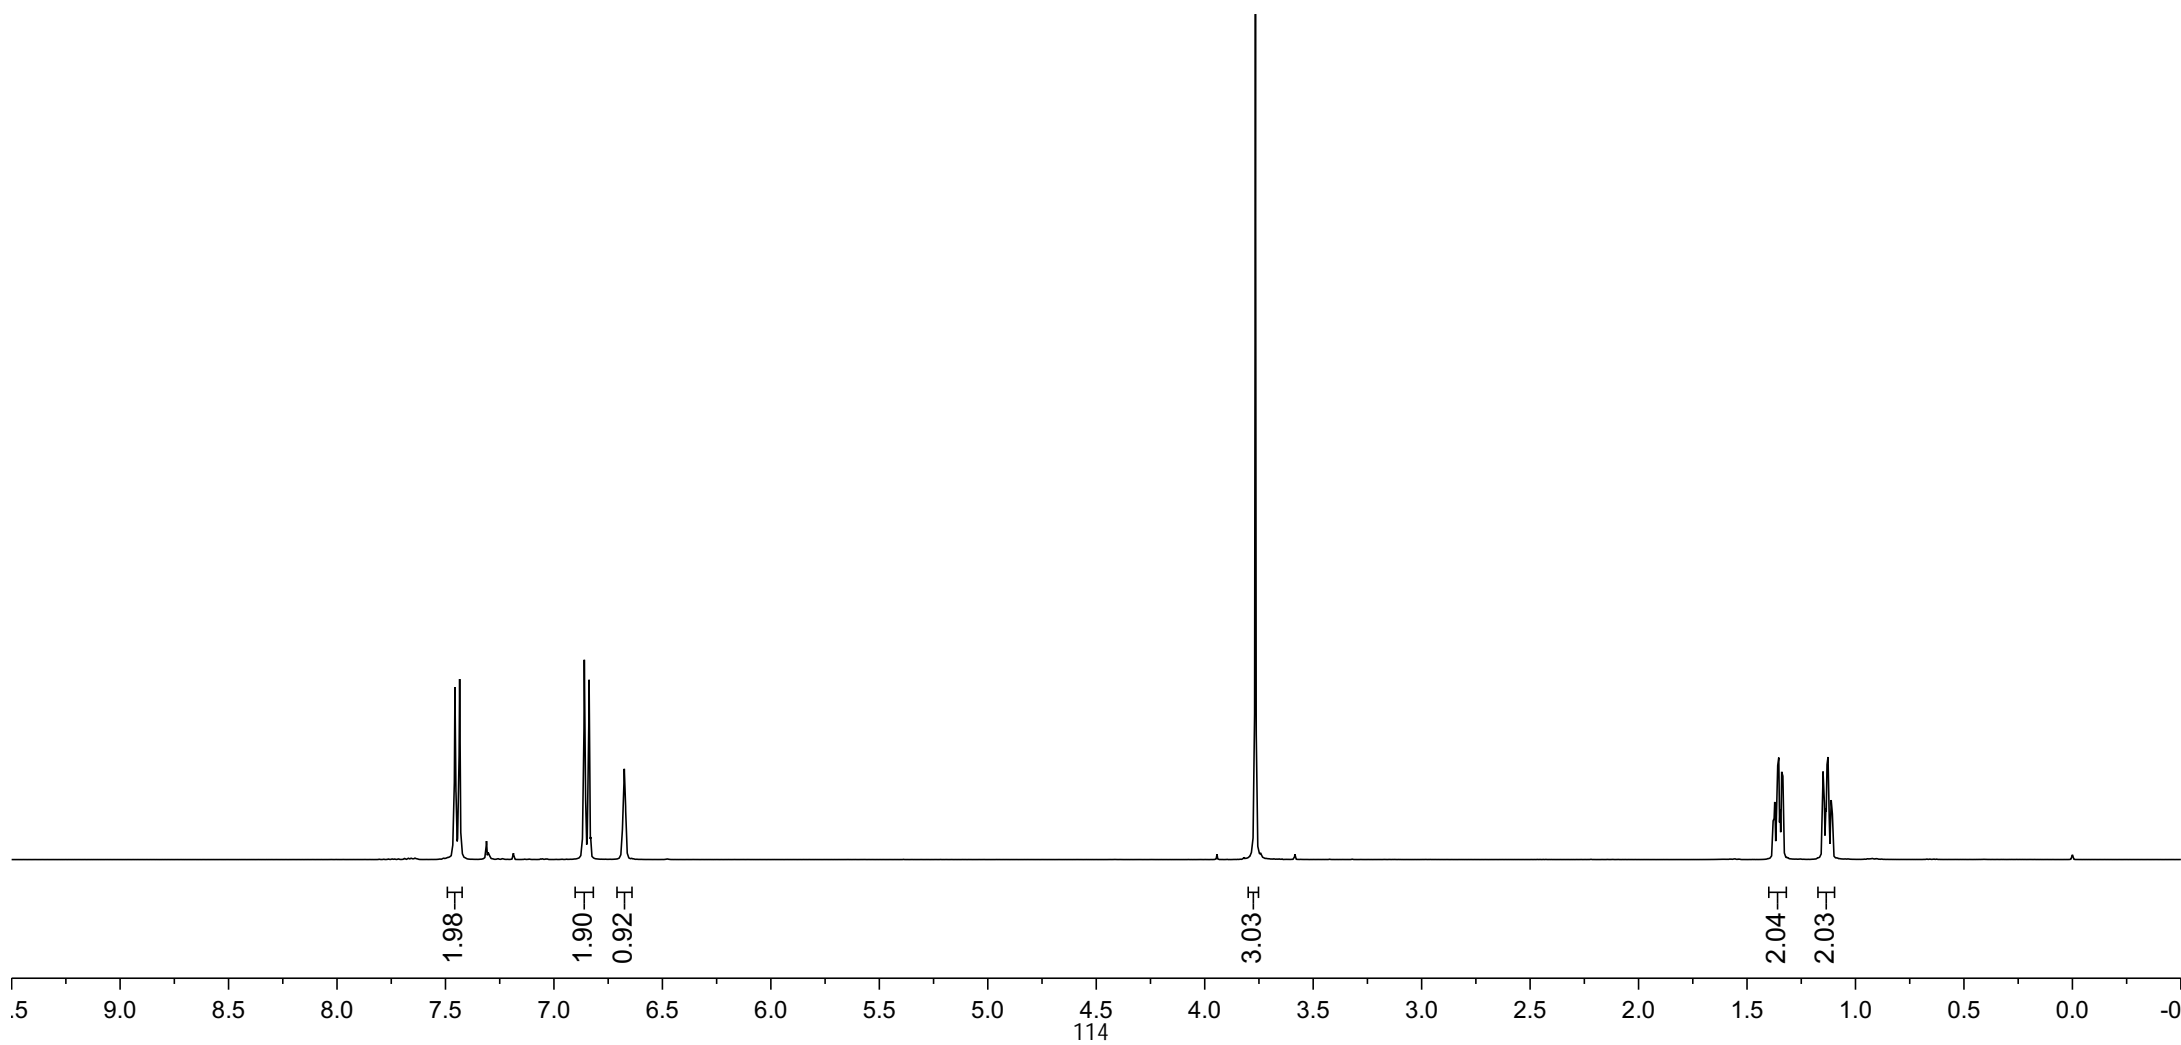

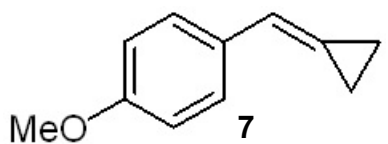

<sup>13</sup>C NMR spectrum (100 MHz, CDCl<sub>3</sub>)

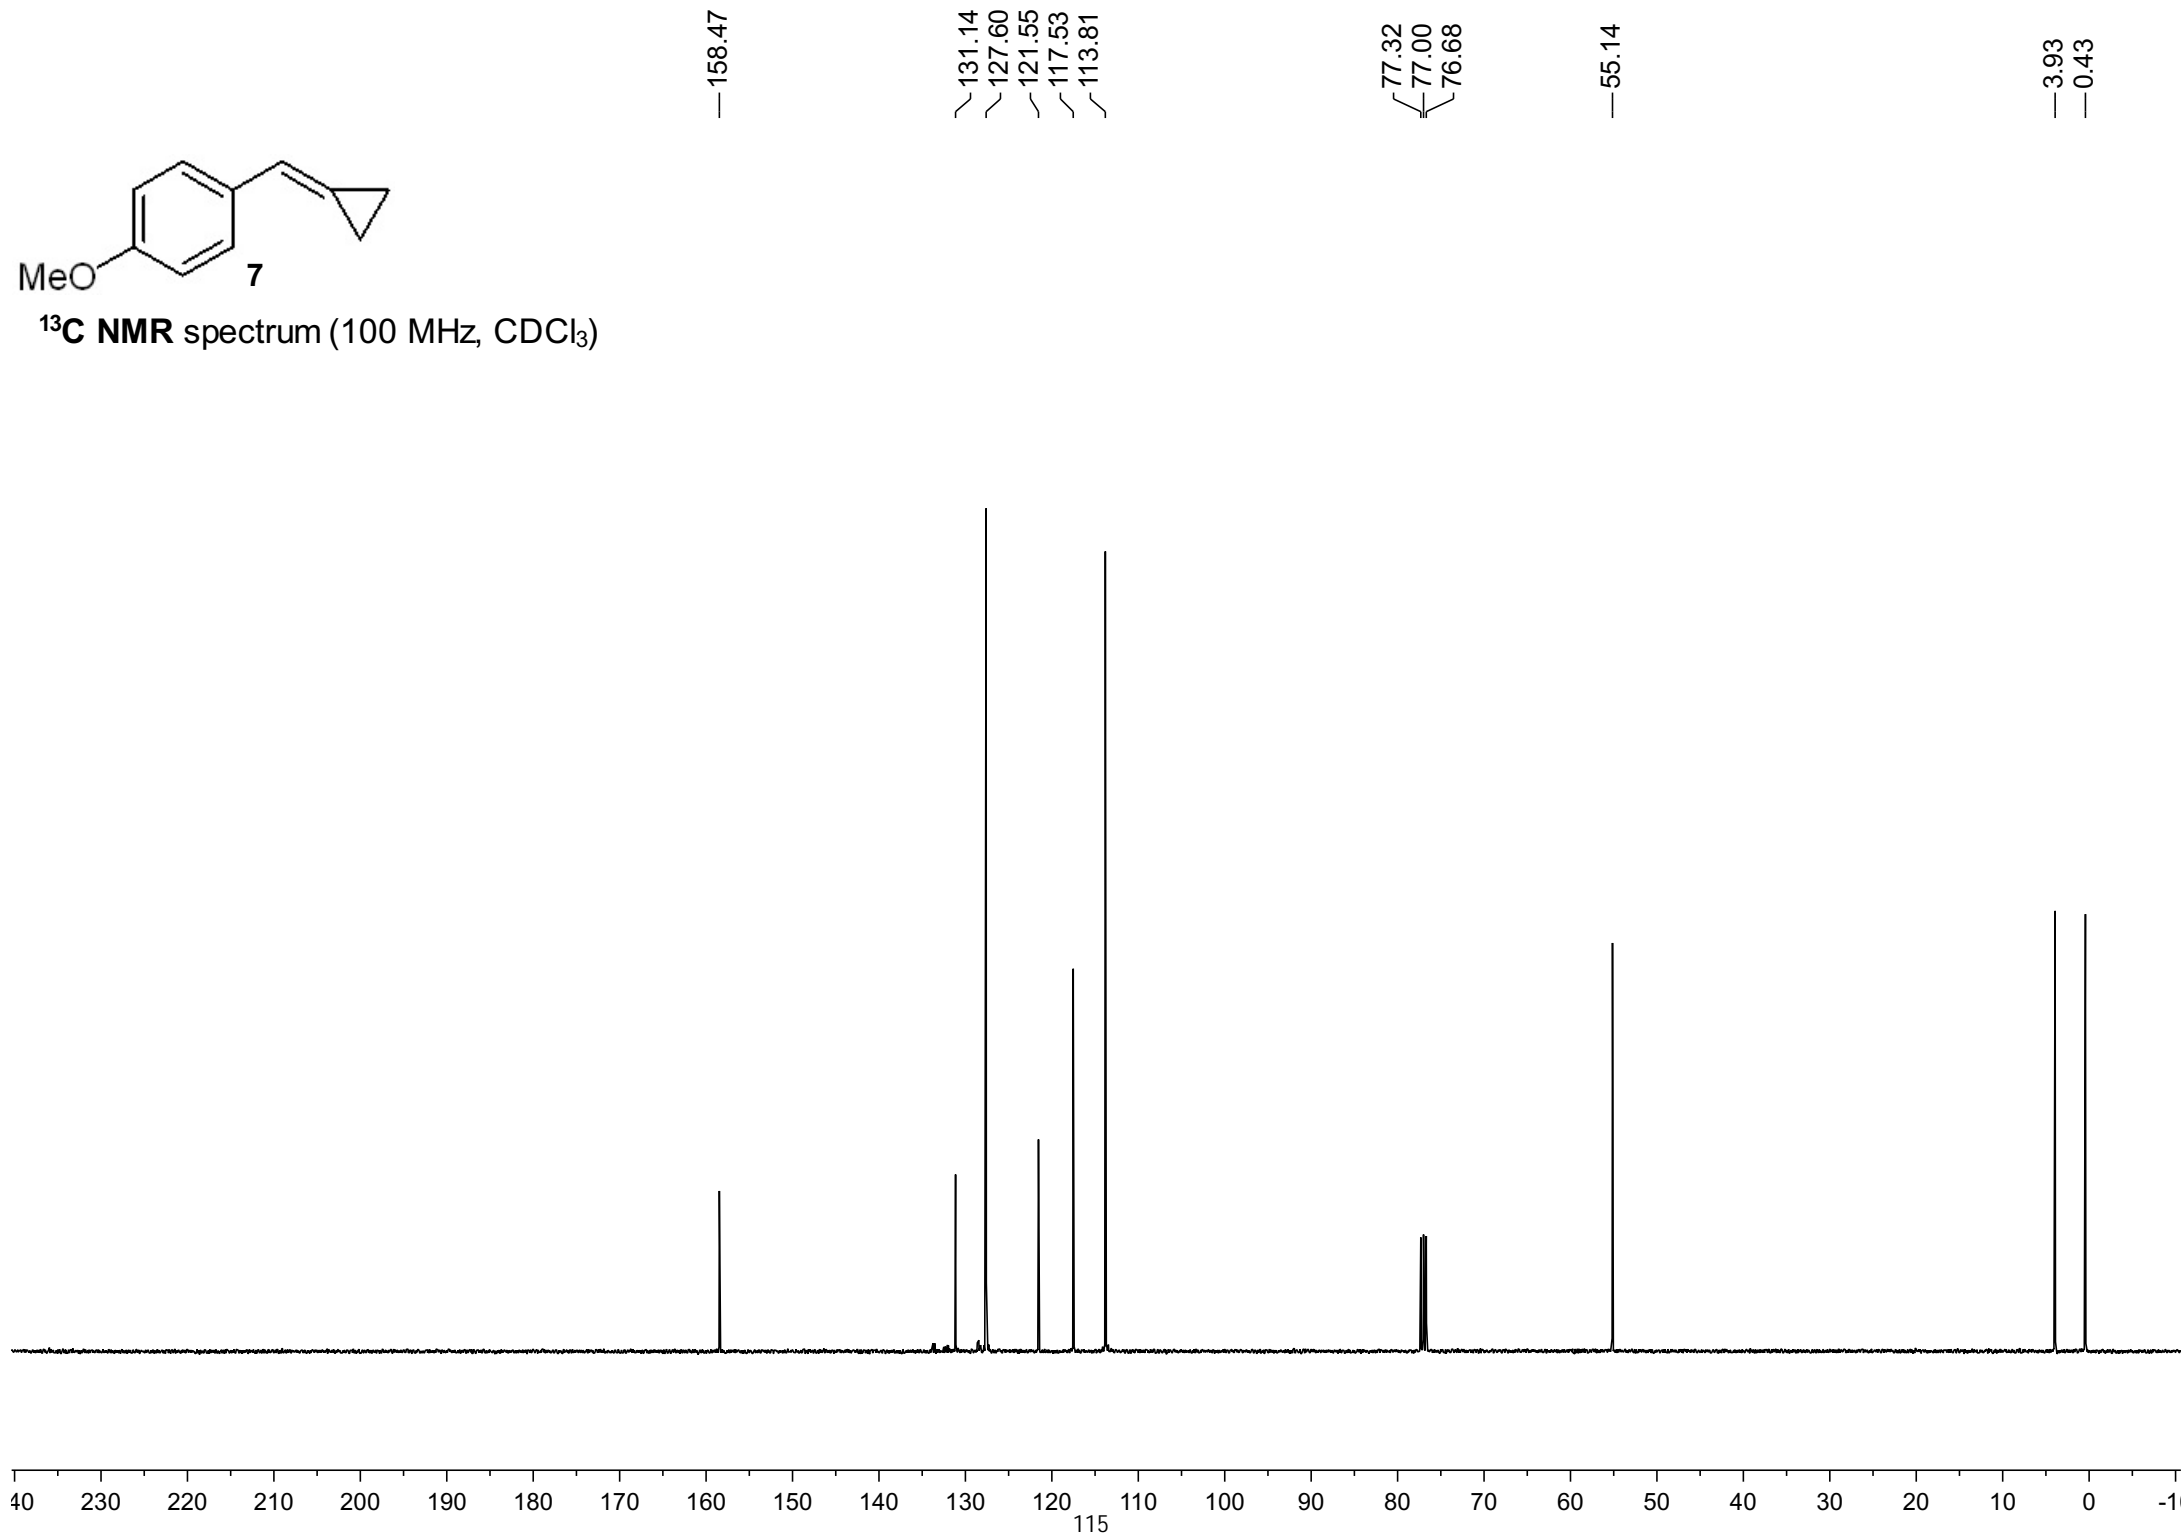



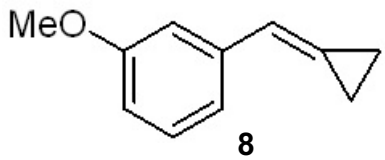

<sup>1</sup>H NMR spectrum (400 MHz, CDCl<sub>3</sub>)

7.256  
7.236  
7.216  
7.121  
7.101  
6.777  
6.772  
6.758  
6.755  
6.752  
6.720  
6.715  
6.711

3.811

1.437  
1.431  
1.417  
1.412  
1.406  
1.398  
1.393  
1.190  
1.186  
1.176  
1.171  
1.167  
1.151  
1.148

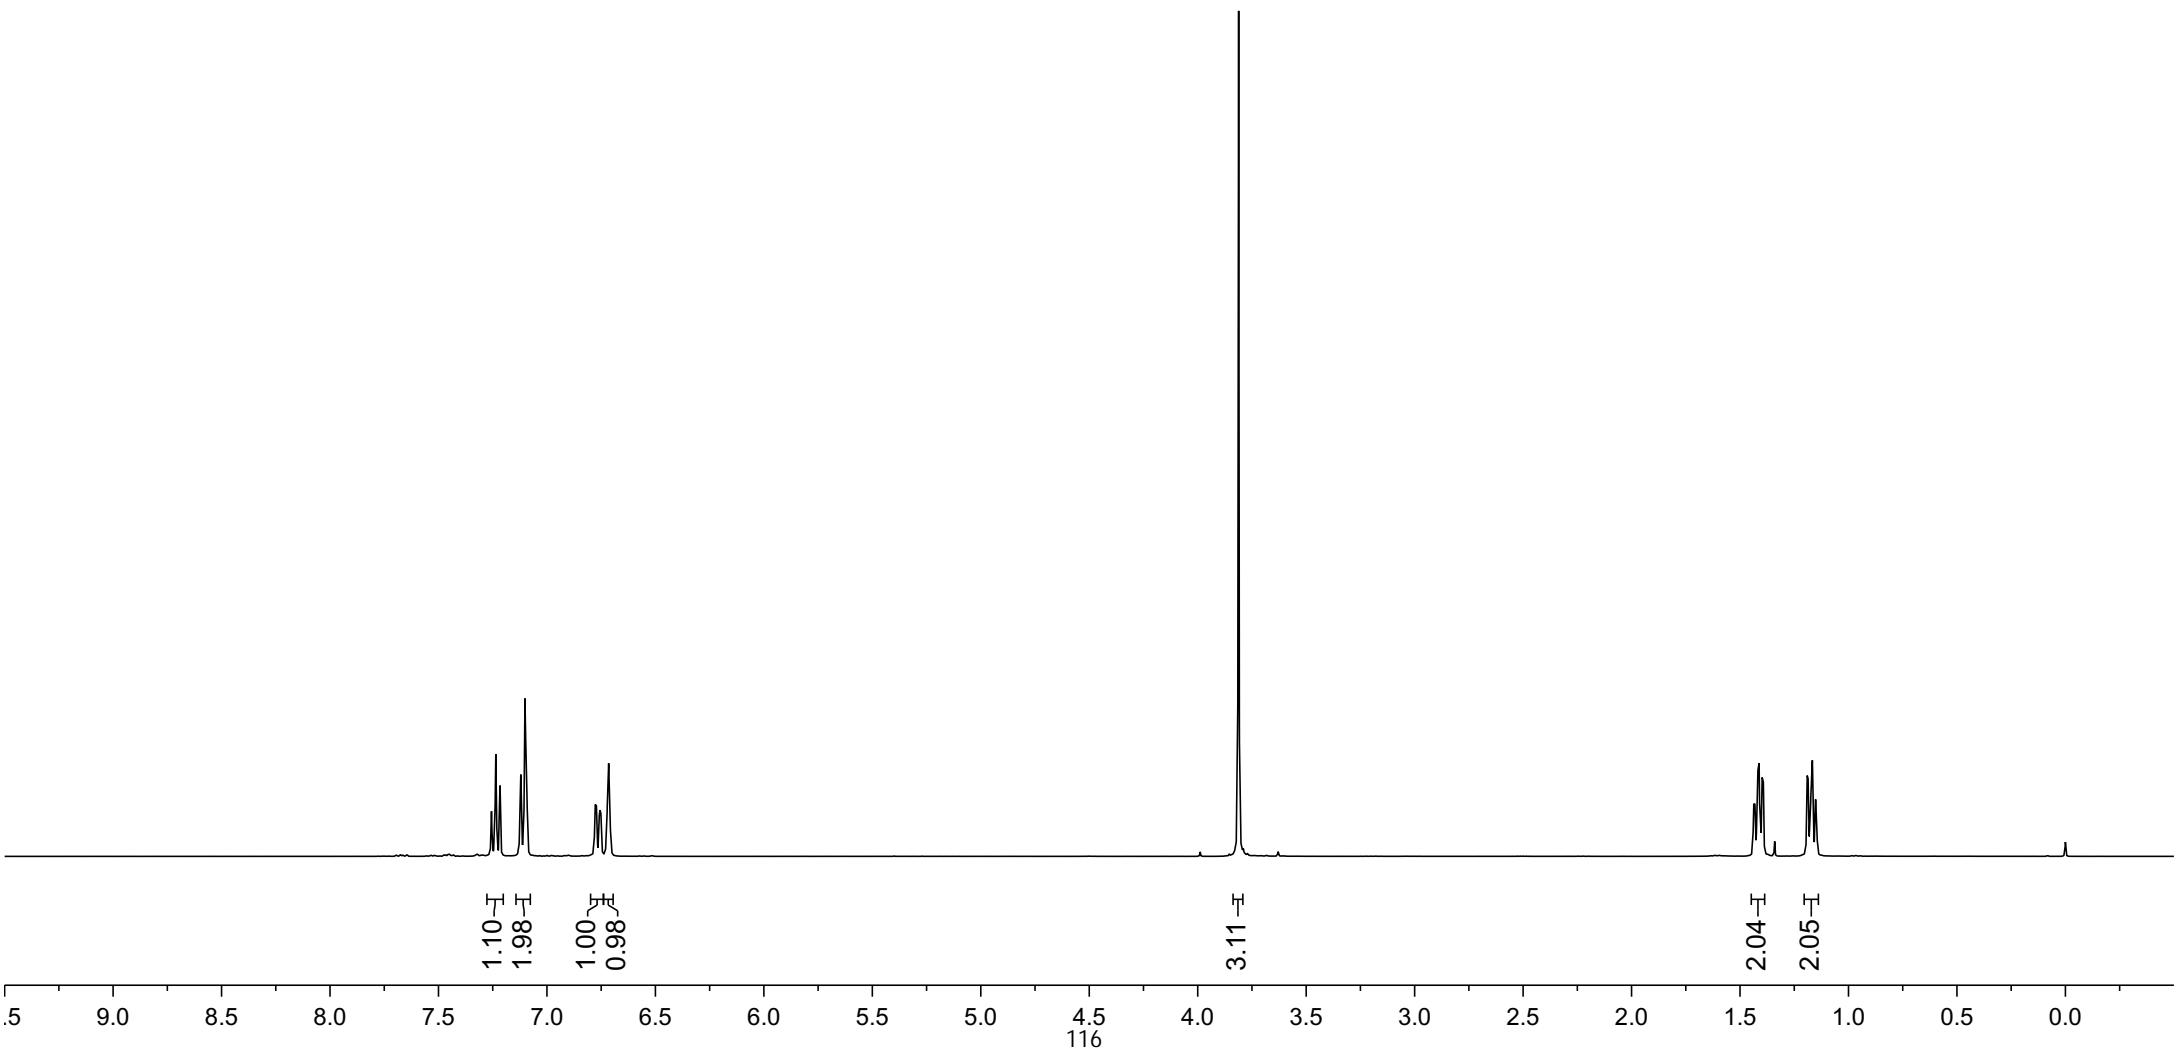

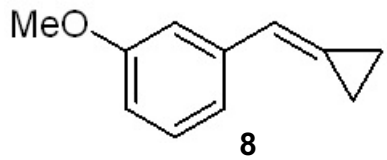

<sup>13</sup>C NMR spectrum (100 MHz, CDCl<sub>3</sub>)

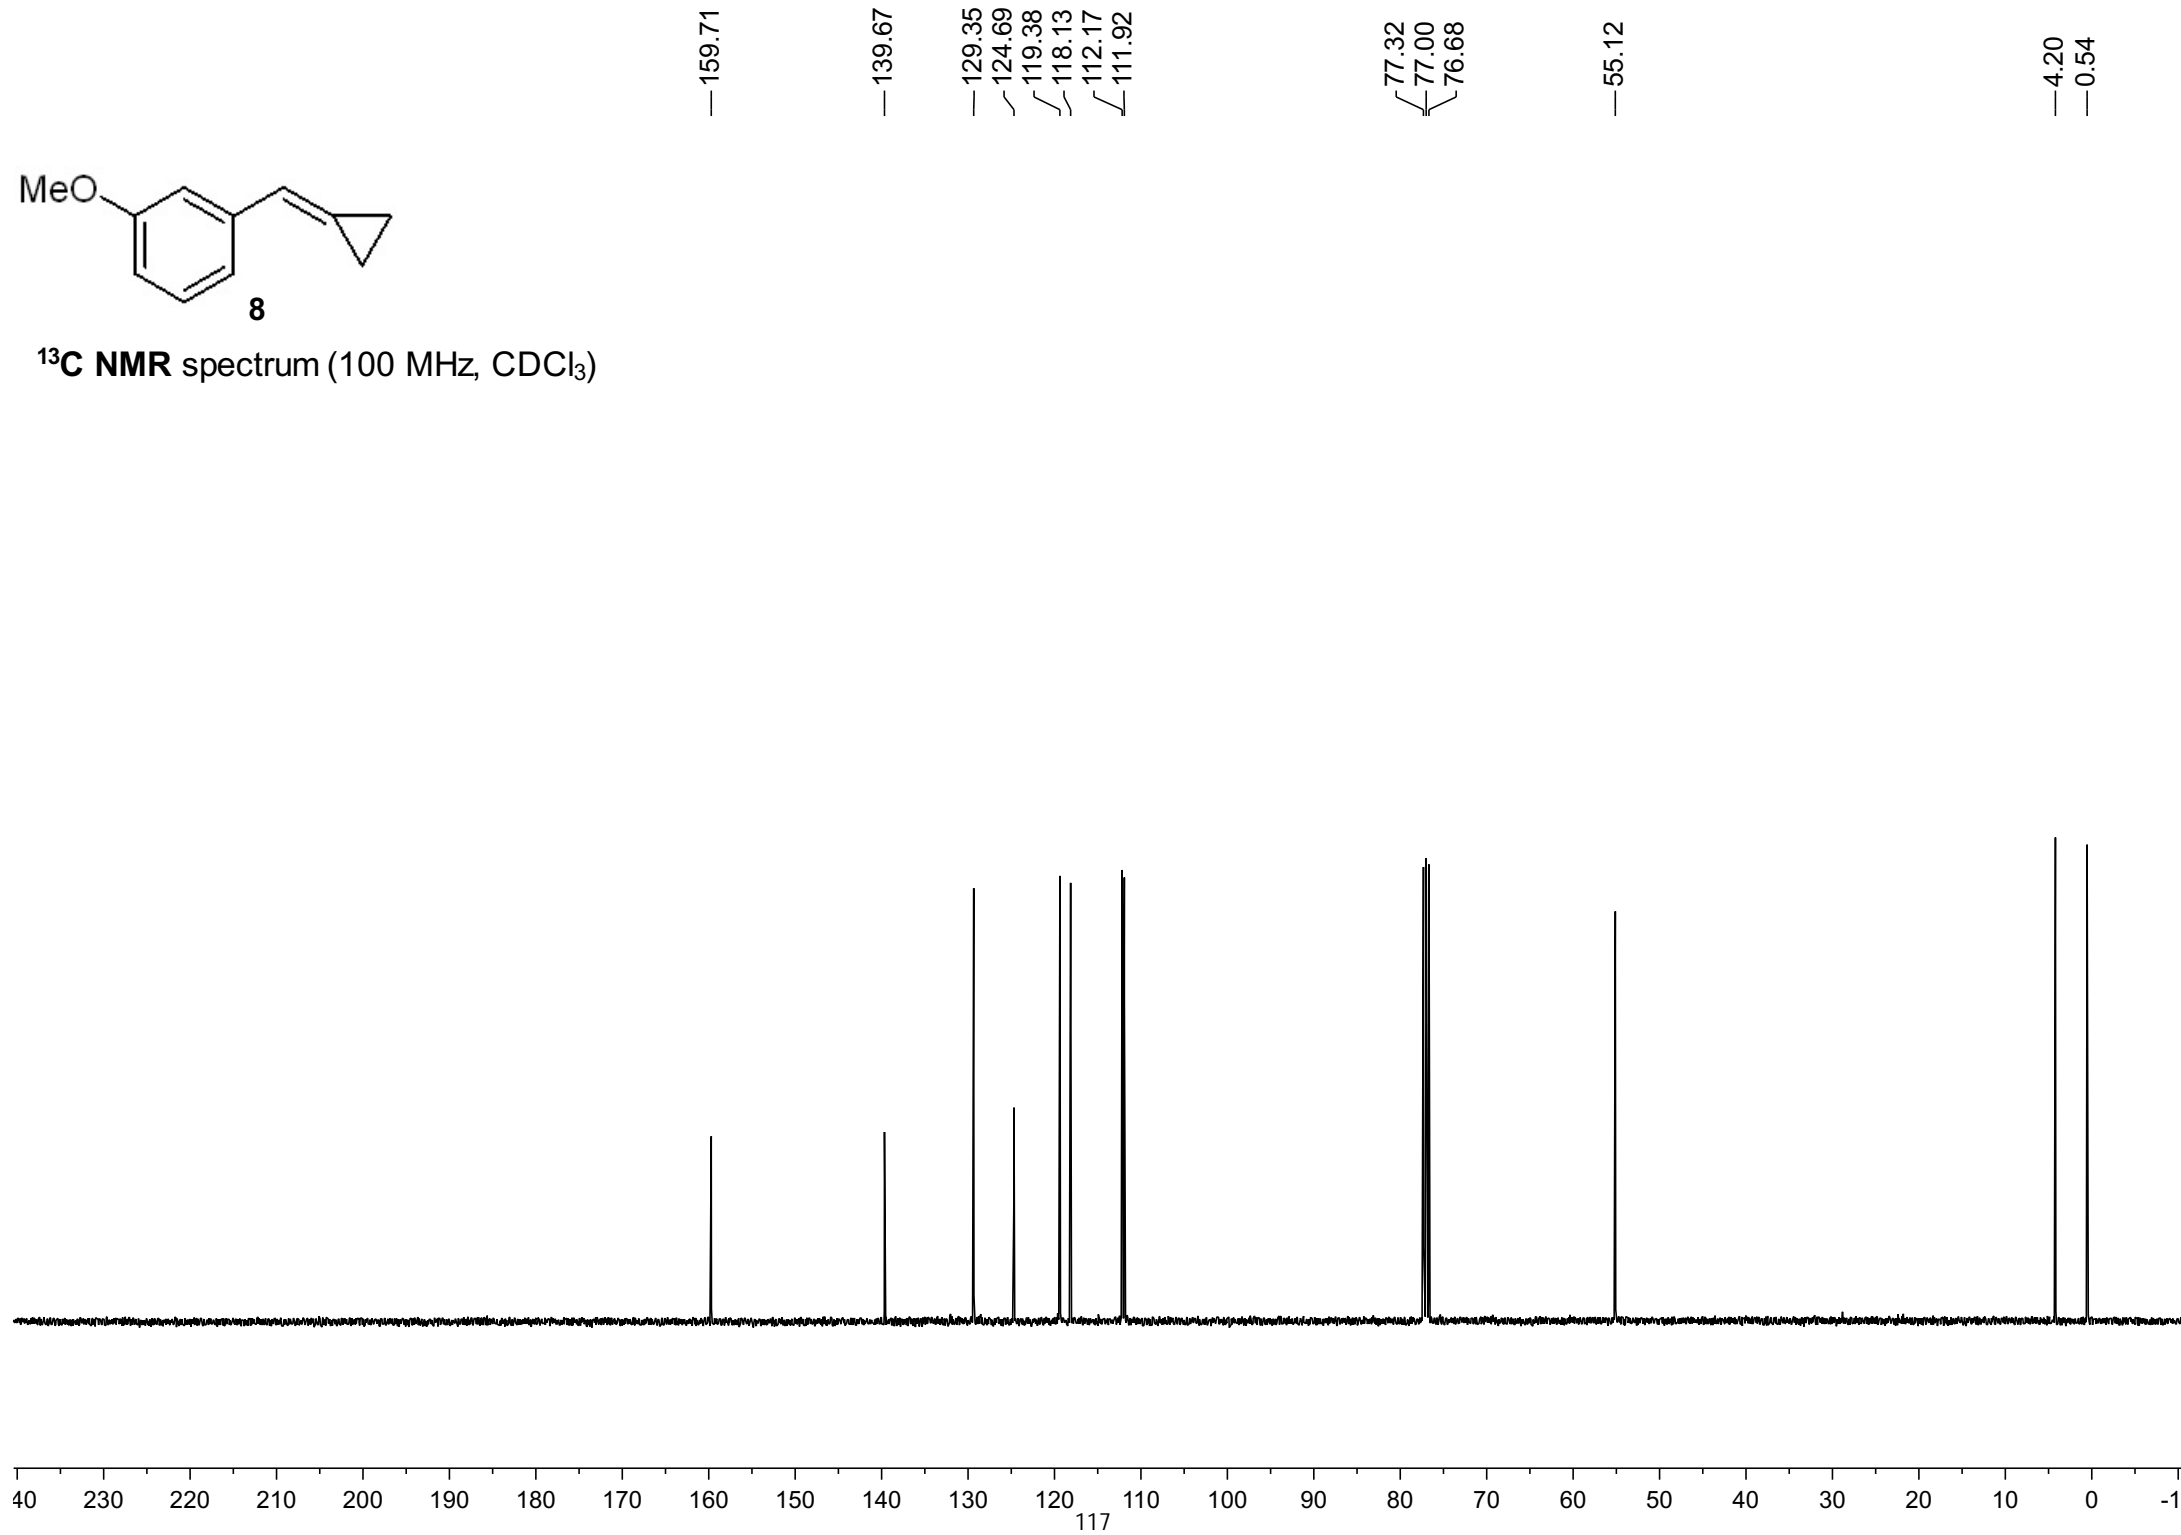

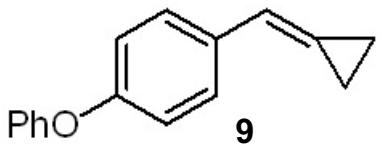

<sup>1</sup>H NMR spectrum (400 MHz, CDCl<sub>3</sub>)

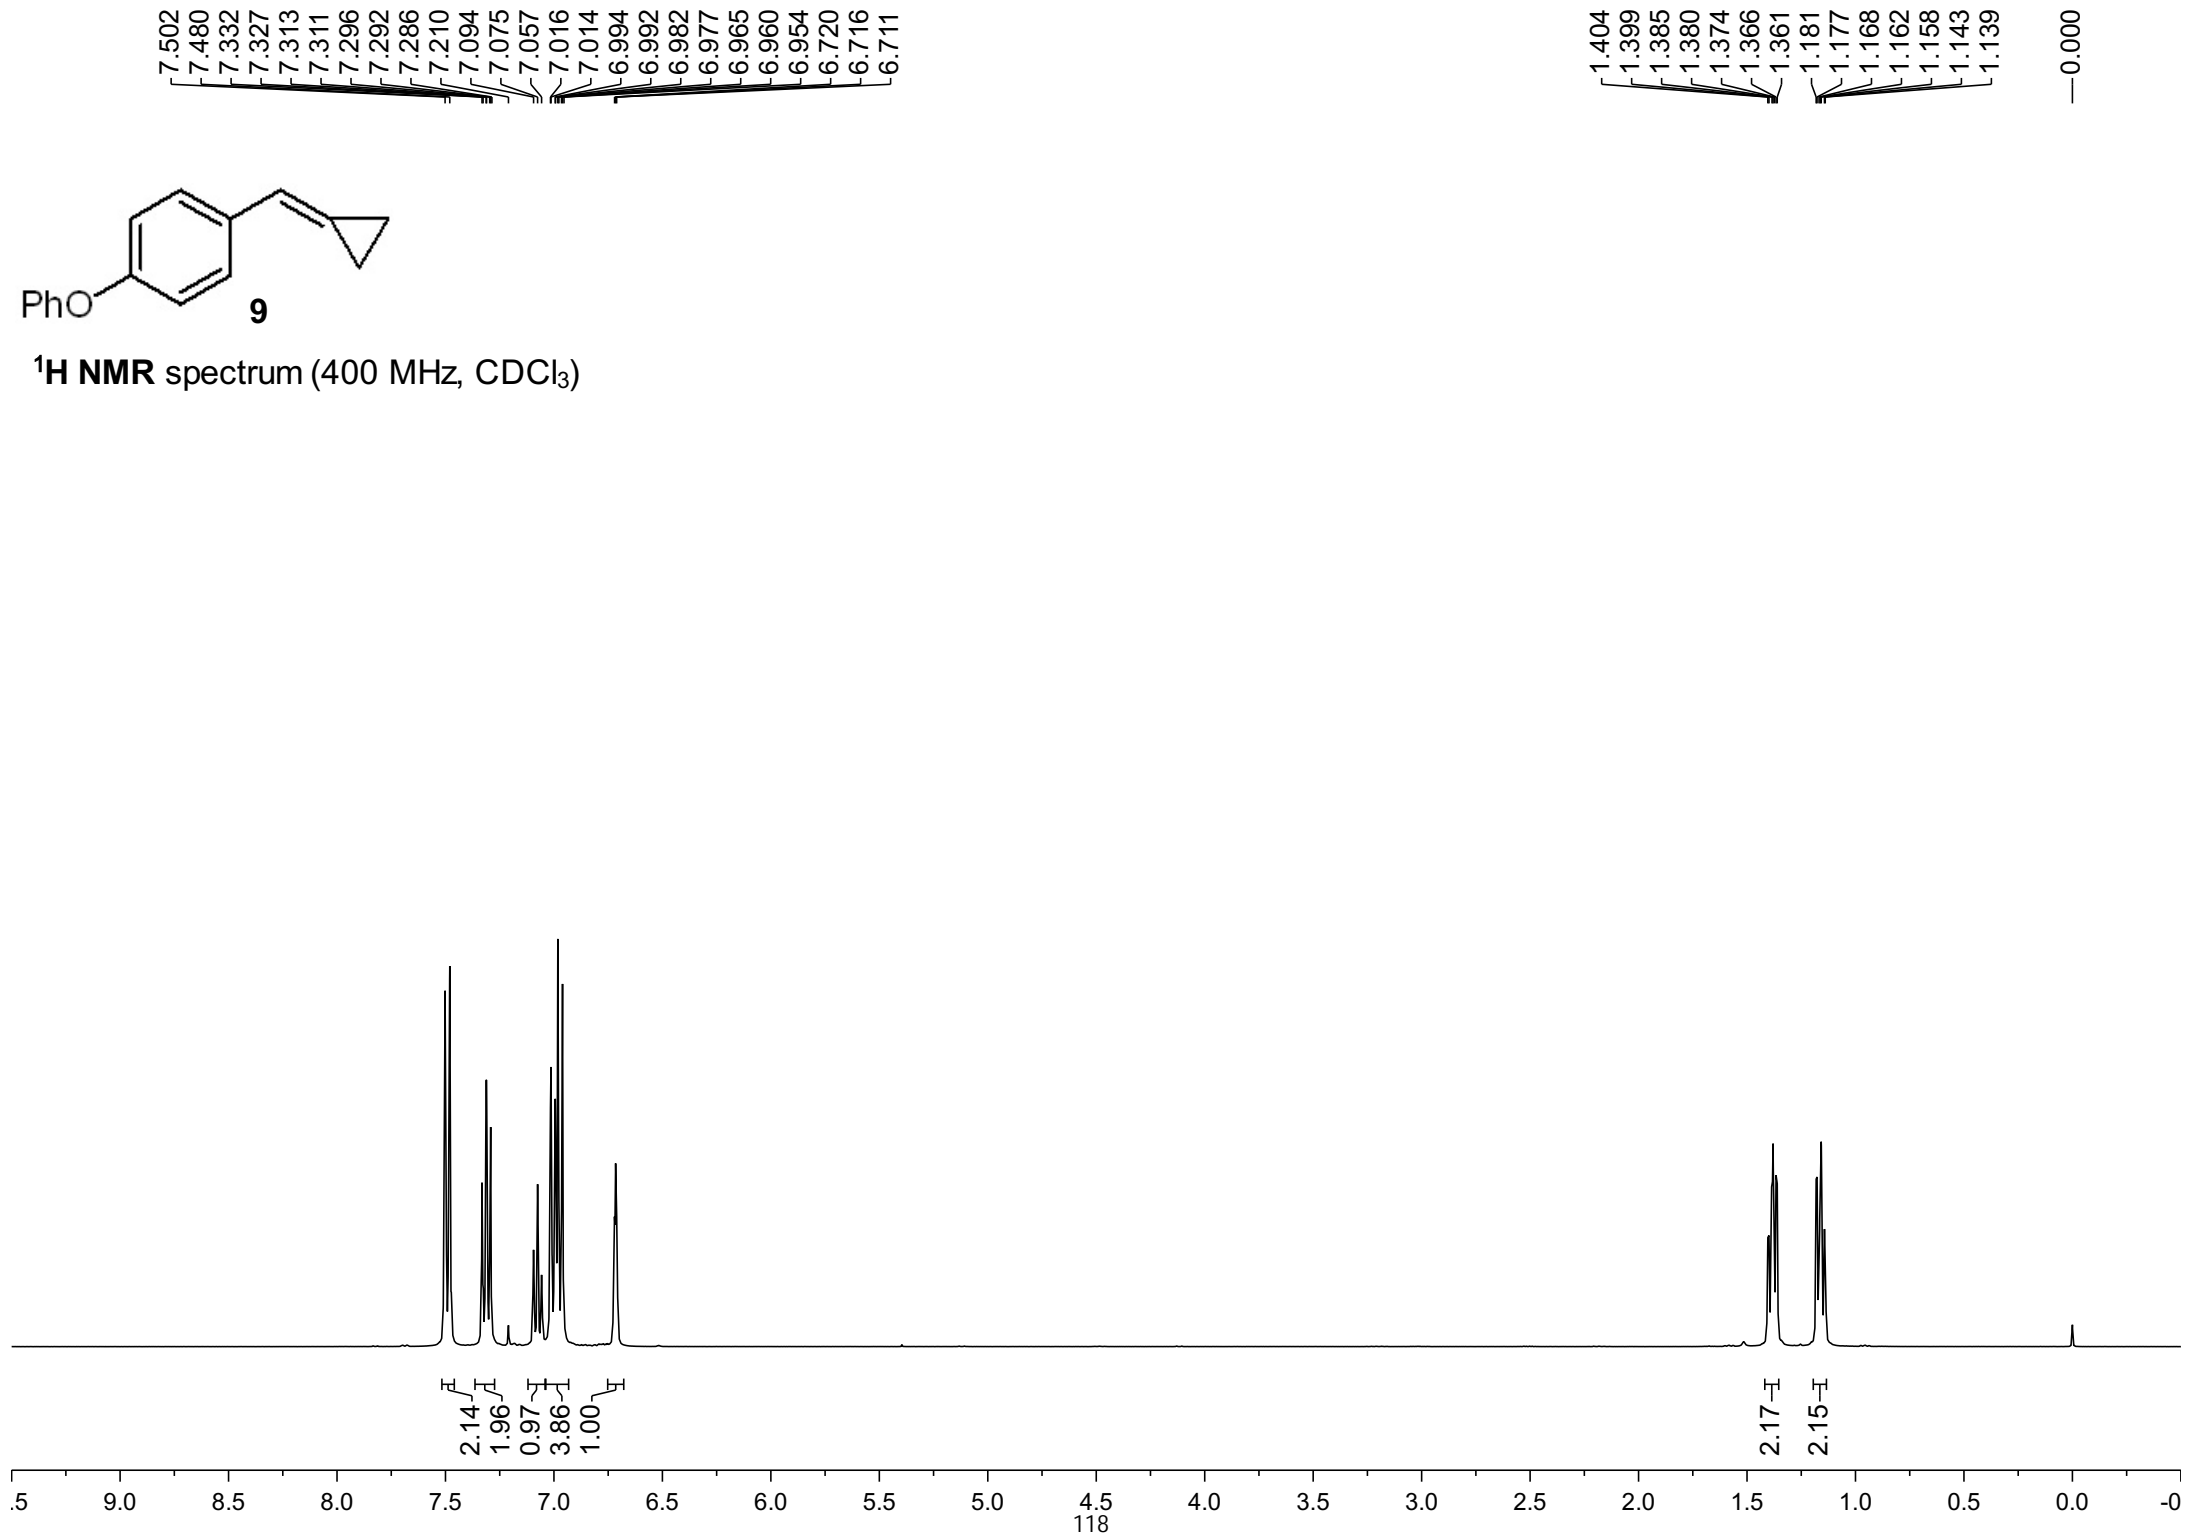



<sup>13</sup>C NMR spectrum (100 MHz, CDCl<sub>3</sub>)

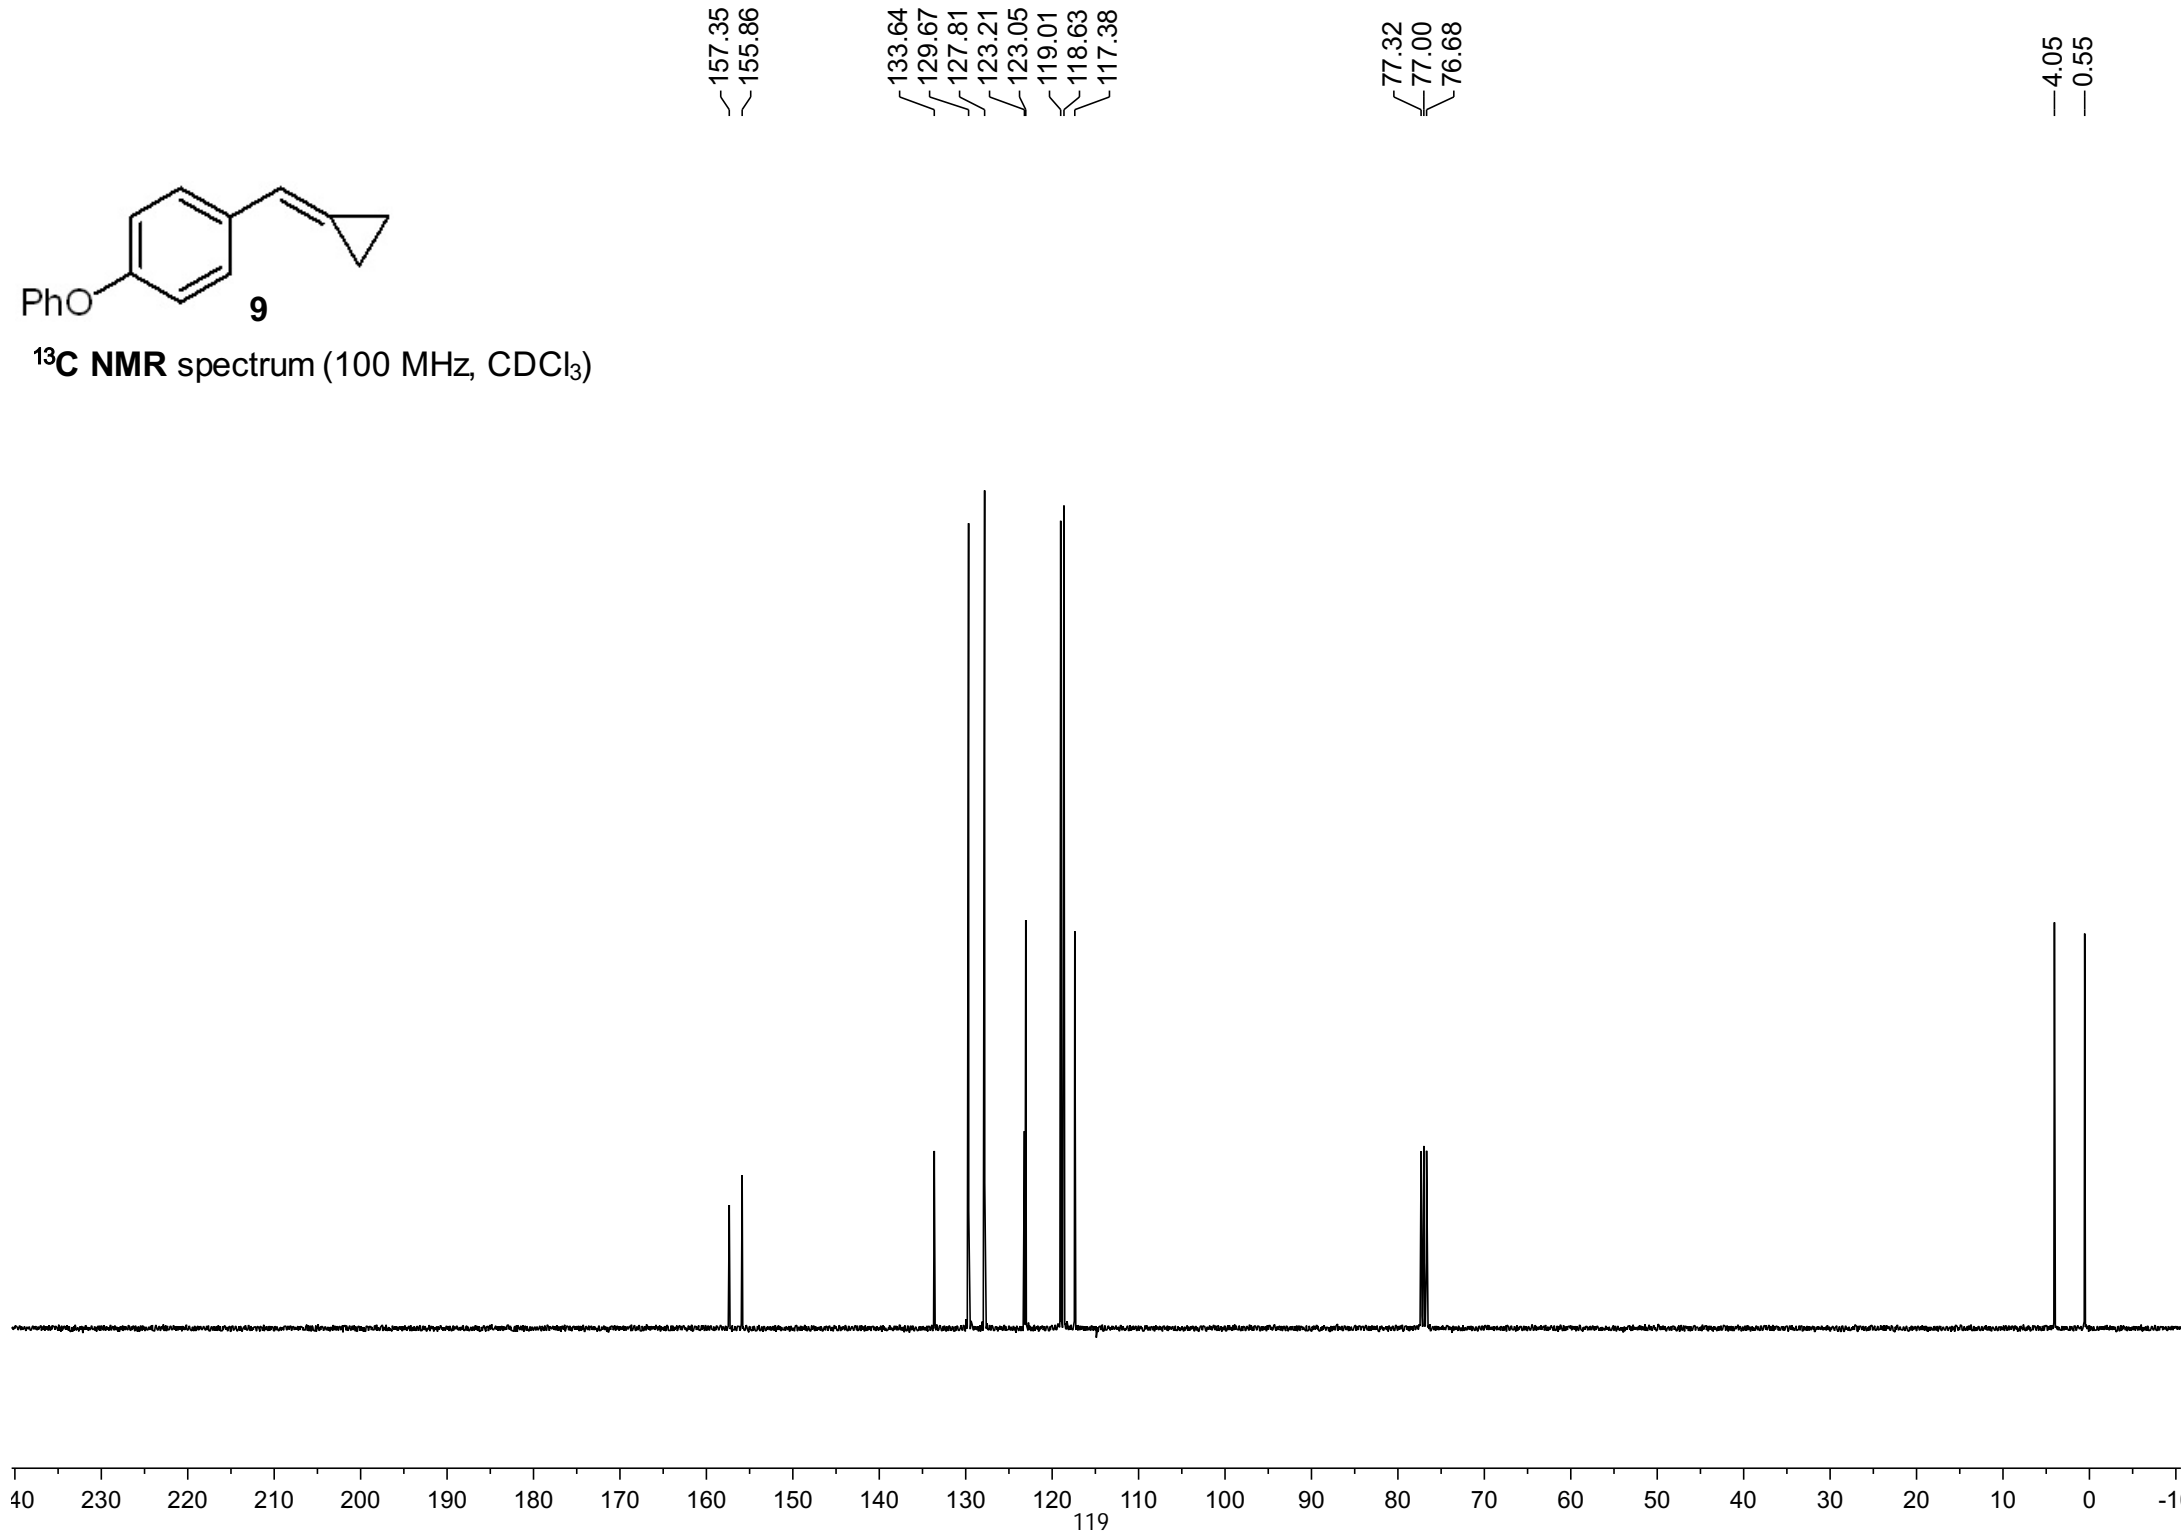

7.461  
7.447  
7.442  
7.429  
7.417  
7.382  
7.370  
7.357  
7.320  
7.308  
7.296  
7.219  
6.946  
6.941  
6.938  
6.926  
6.922  
6.686  
6.682  
6.679

5.052

1.381  
1.378  
1.368  
1.365  
1.361  
1.356  
1.352  
1.154  
1.152  
1.145  
1.142  
1.139  
1.129  
1.127

0.000

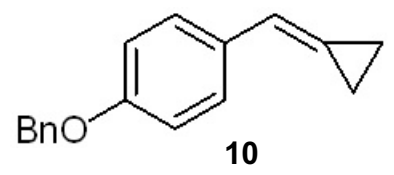

<sup>1</sup>H NMR spectrum (600 MHz, CDCl<sub>3</sub>)

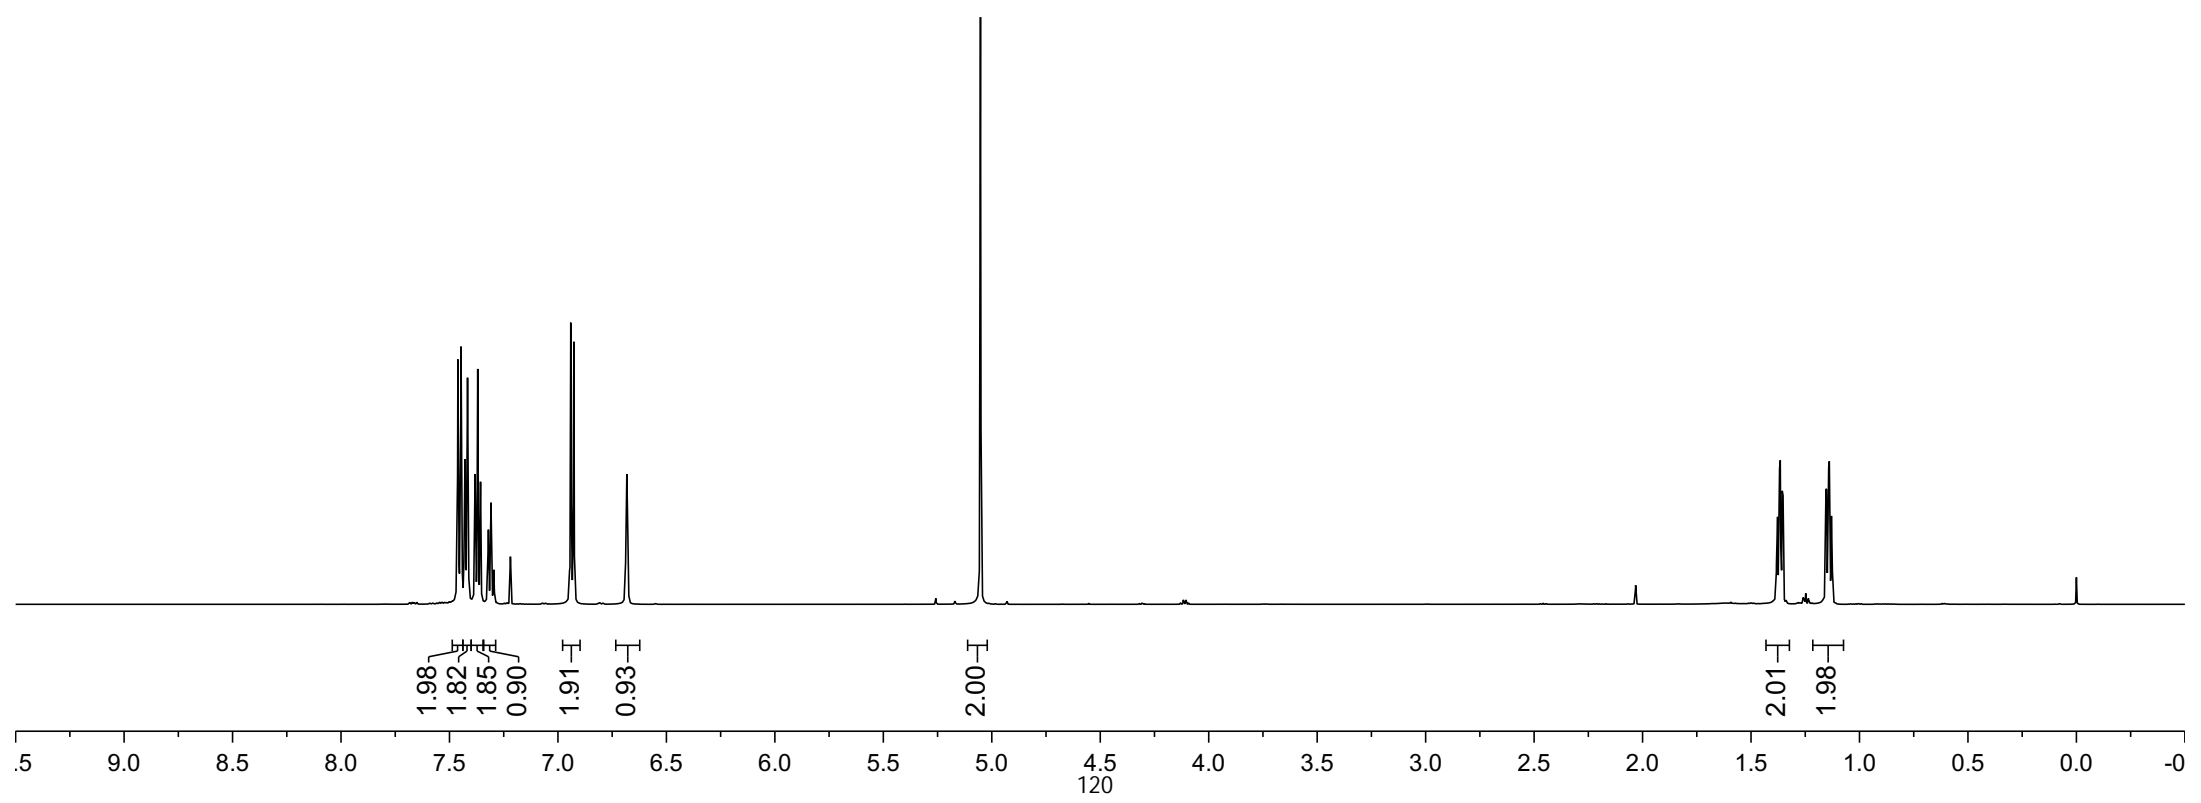

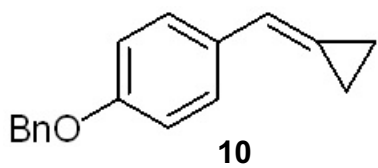

<sup>13</sup>C NMR spectrum (150 MHz, CDCl<sub>3</sub>)

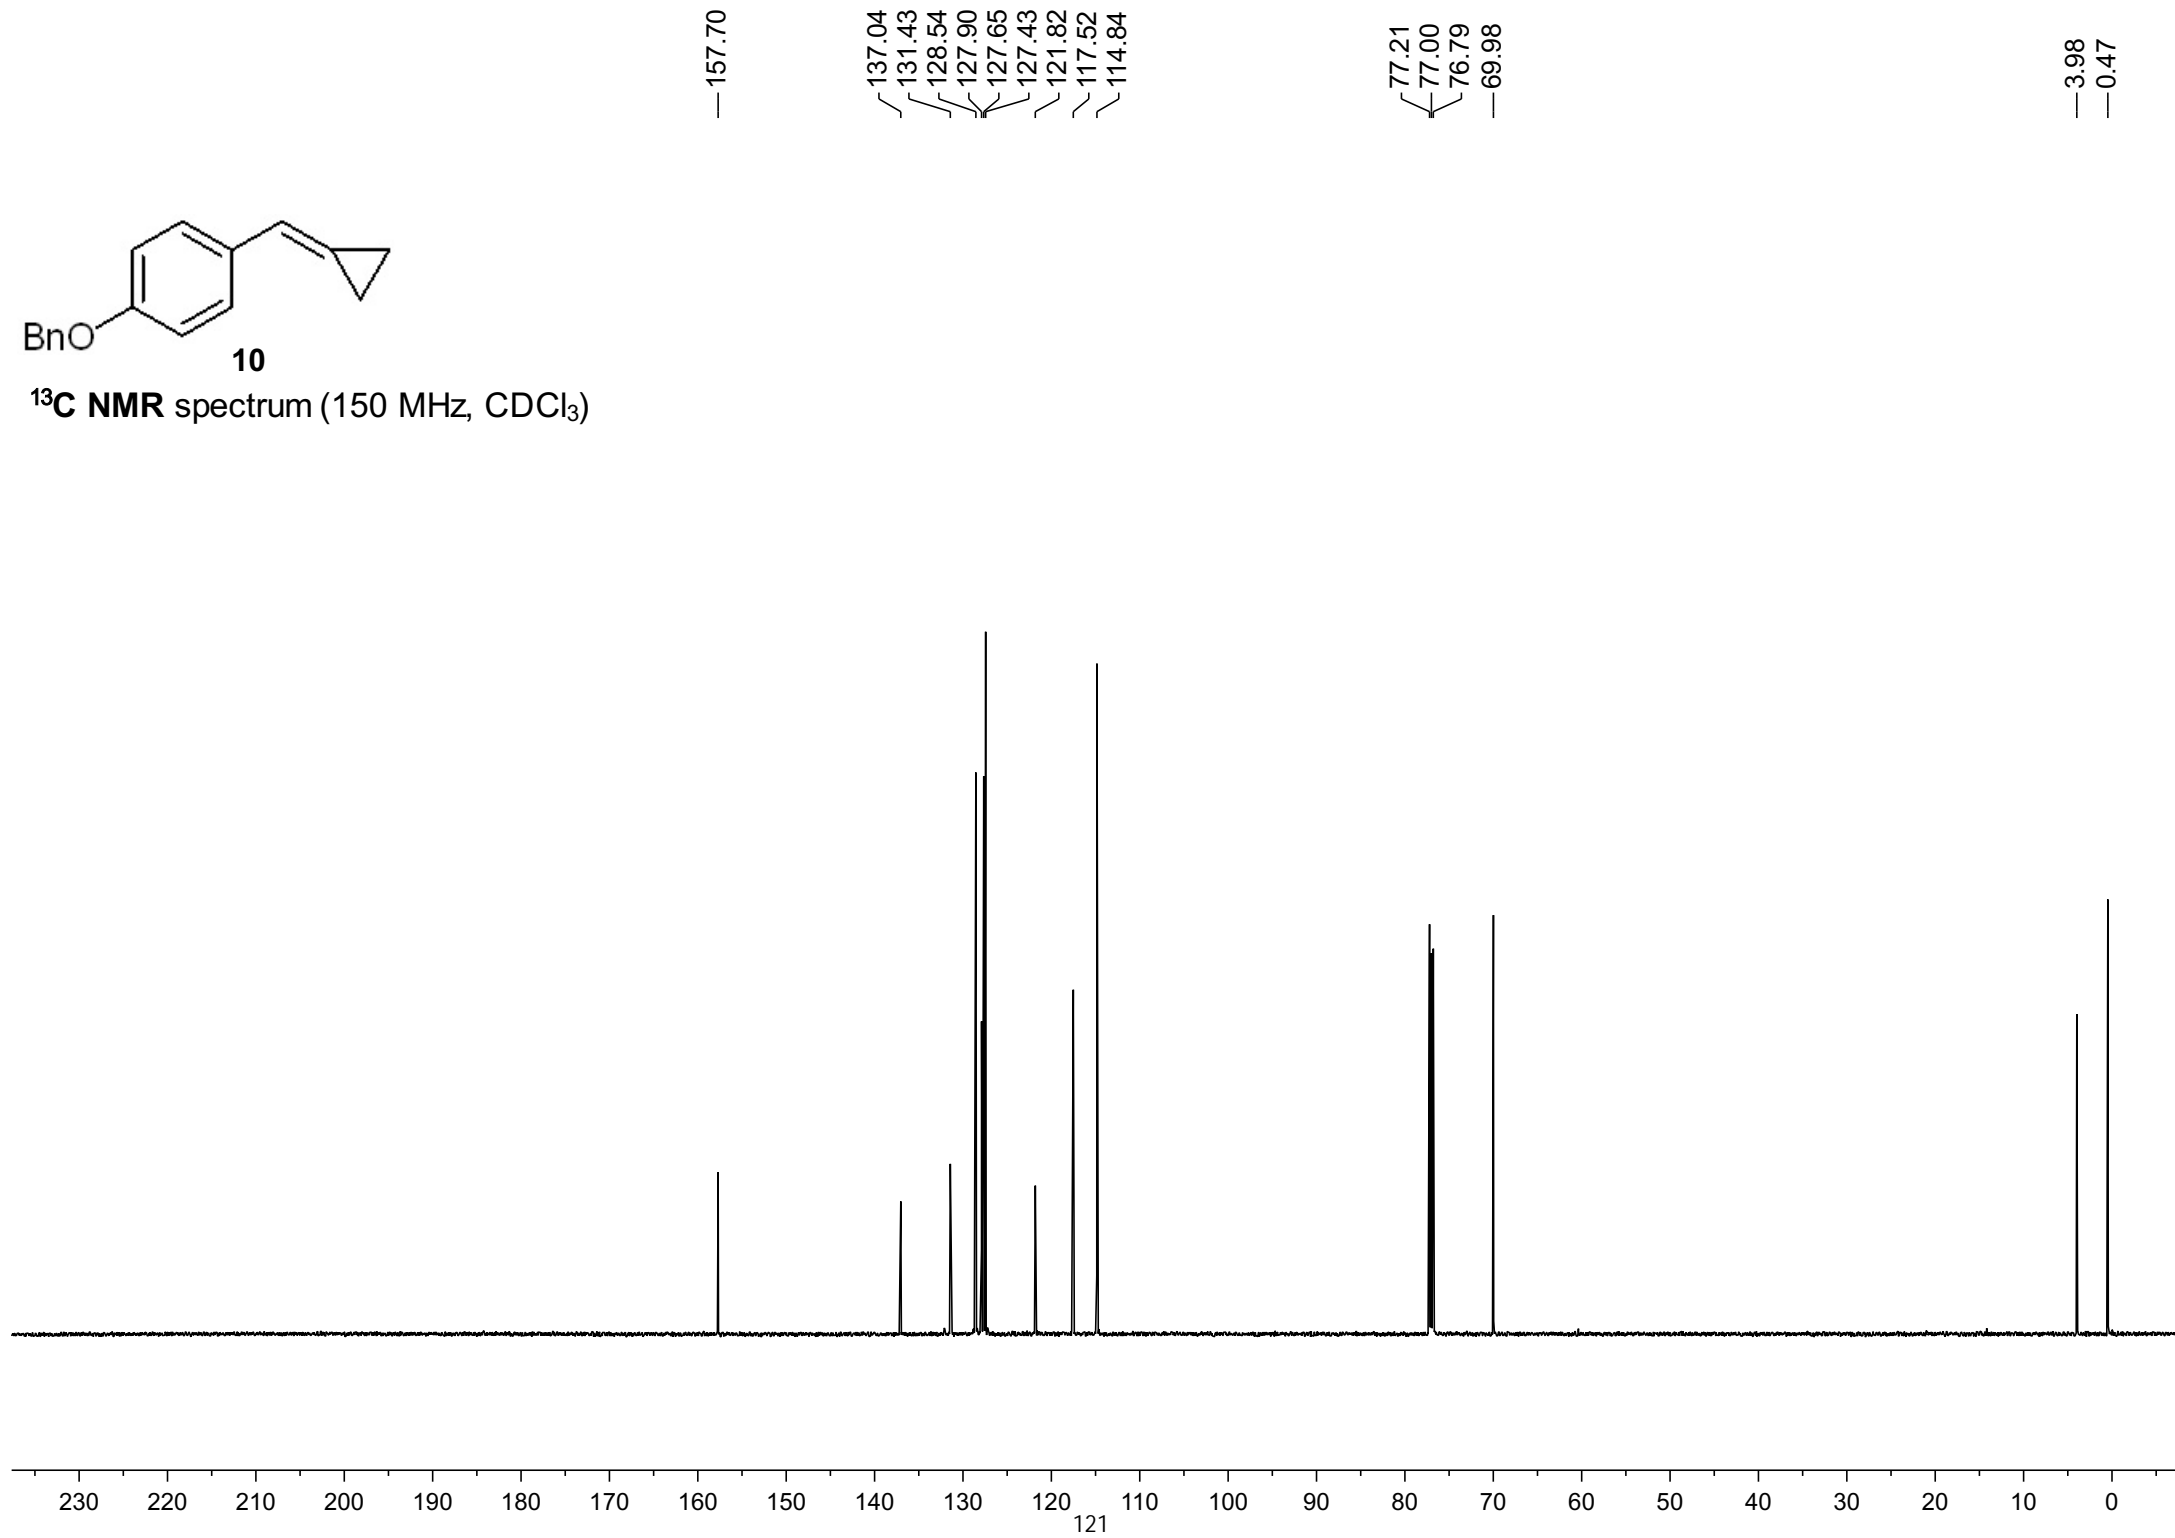

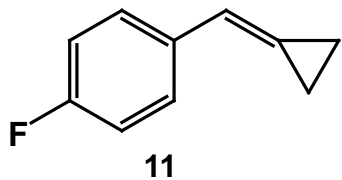

<sup>1</sup>H NMR spectrum (400 MHz, CDCl<sub>3</sub>)

7.490  
7.483  
7.477  
7.469  
7.461  
7.452  
7.447  
7.440  
7.208  
7.022  
7.015  
7.009  
6.998  
6.993  
6.988  
6.976  
6.971  
6.964  
6.700  
6.695  
6.690  
6.685  
6.680

1.391  
1.385  
1.371  
1.367  
1.360  
1.353  
1.347  
1.173  
1.169  
1.159  
1.154  
1.150  
1.134  
1.131  
-0.000

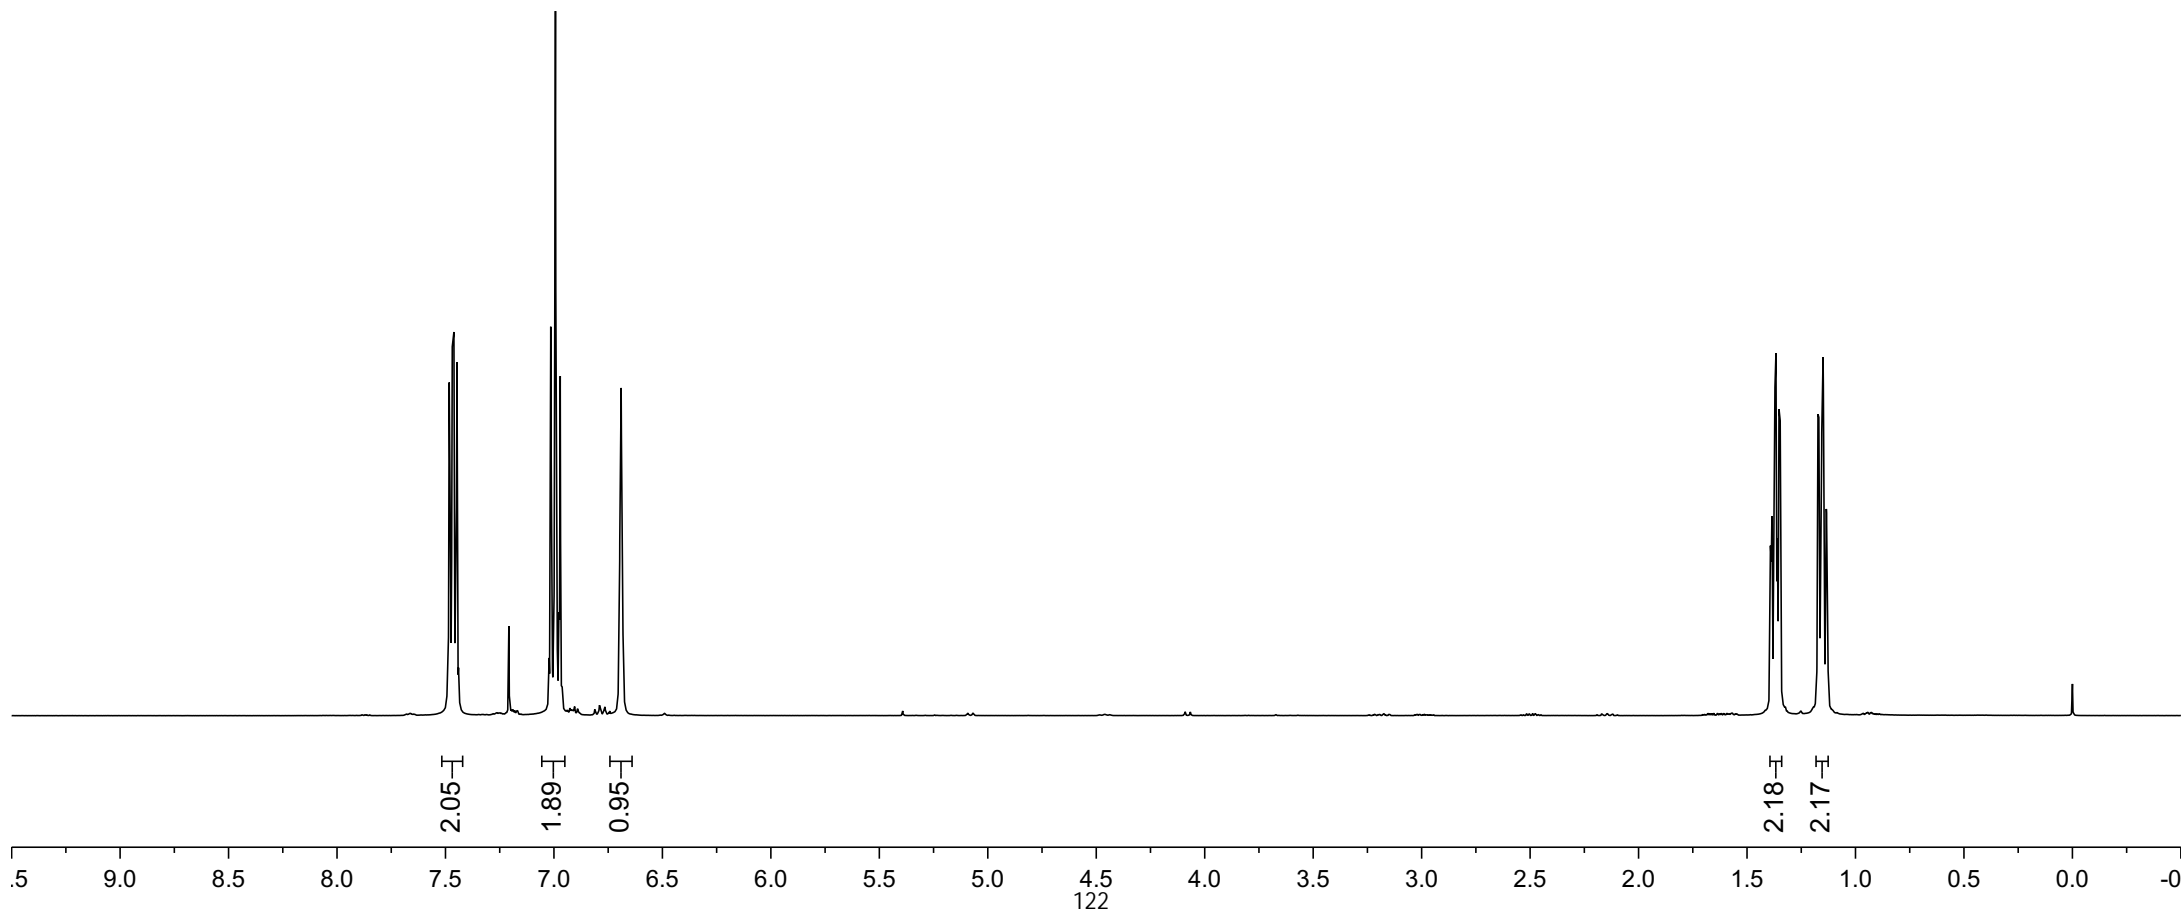

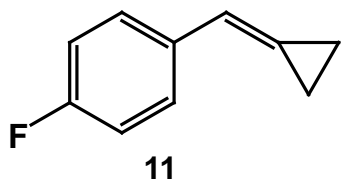

<sup>13</sup>C NMR spectrum (100 MHz, CDCl<sub>3</sub>)

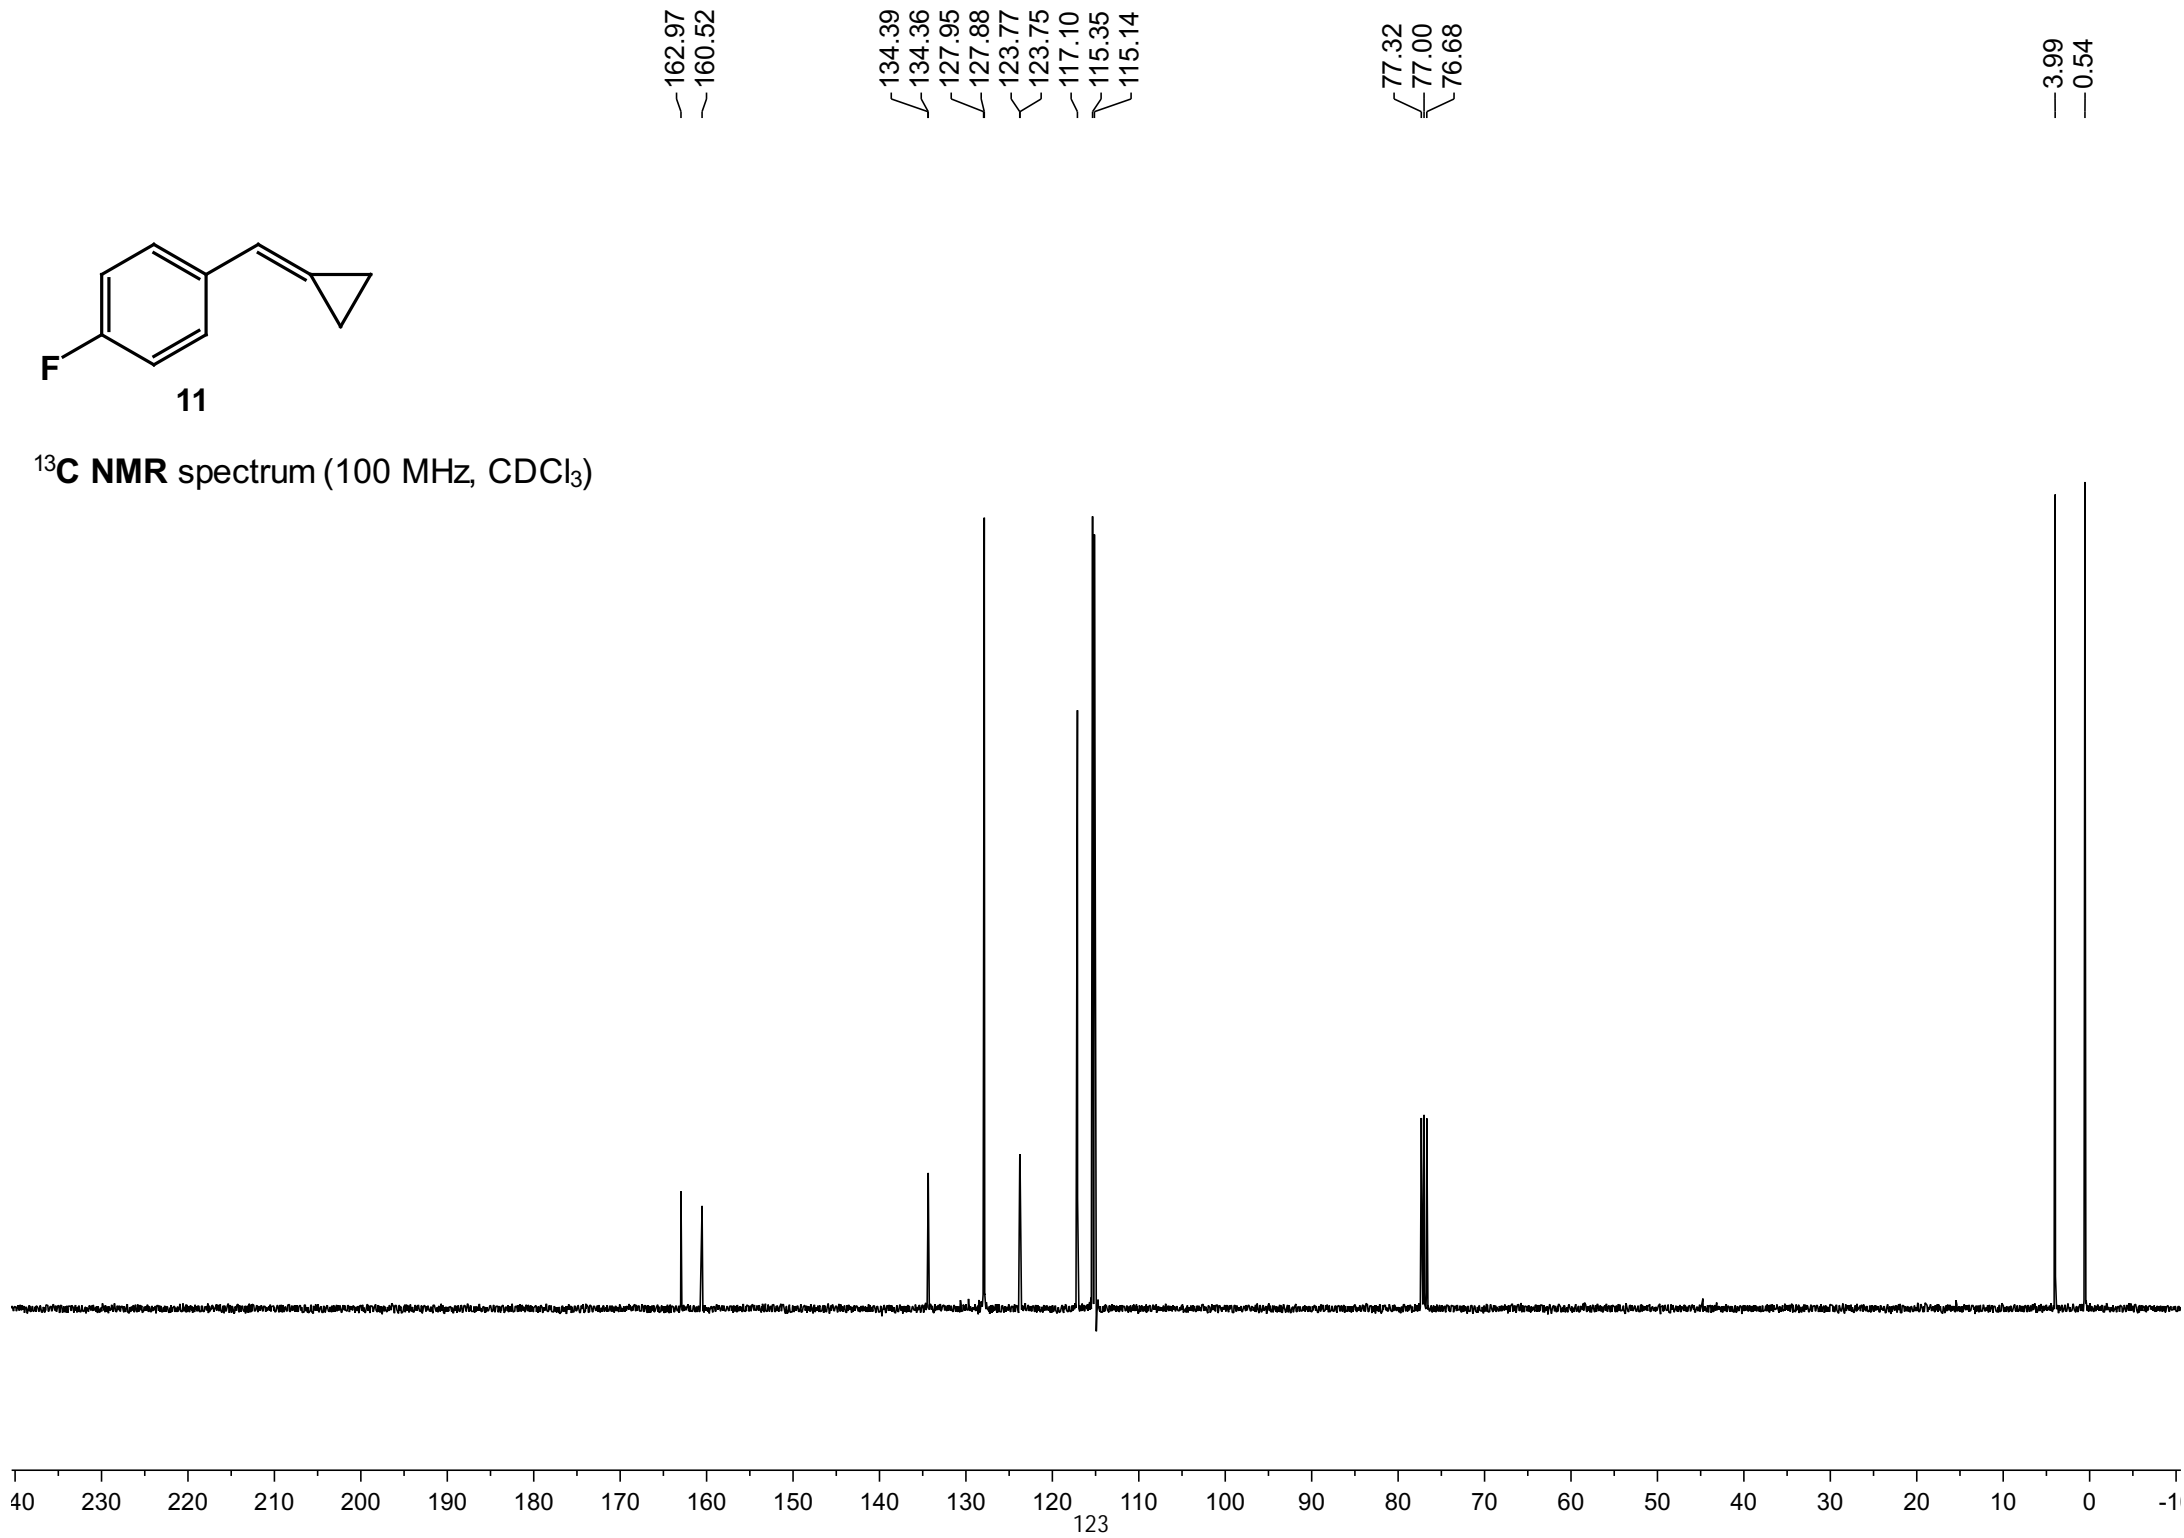





<sup>19</sup>F NMR spectrum (376 MHz, CDCl<sub>3</sub>)

---115.73

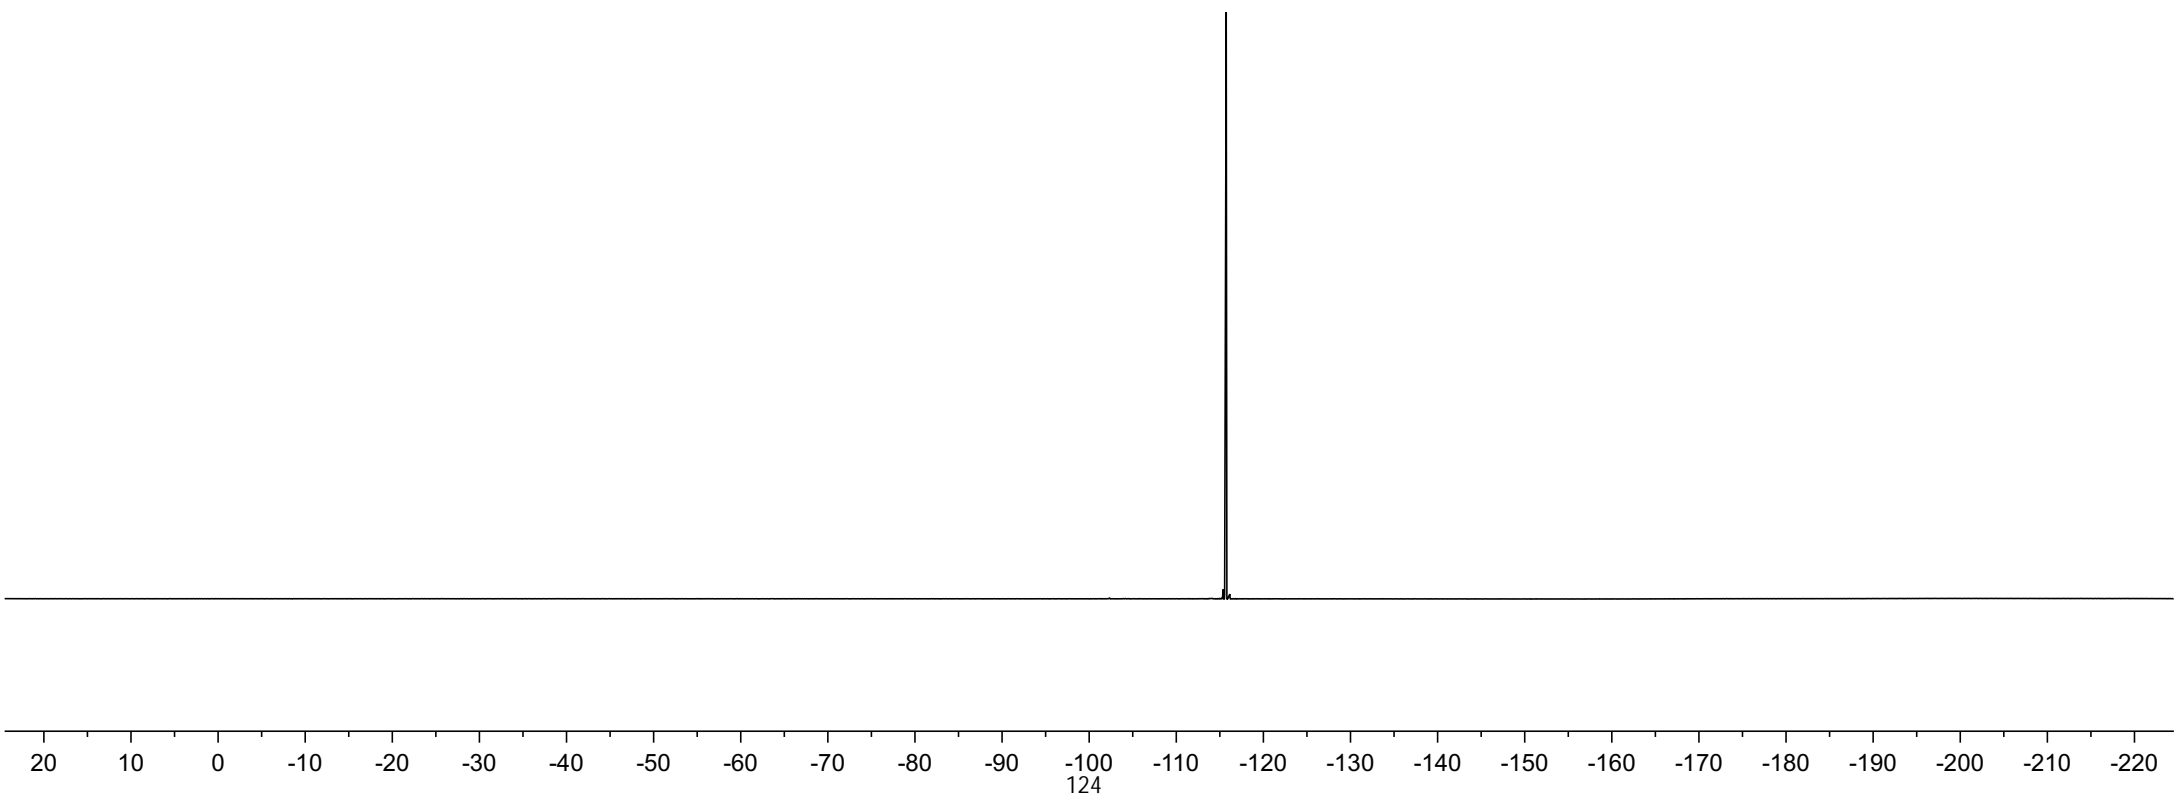

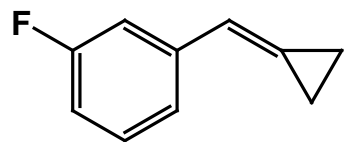

12

<sup>1</sup>H NMR spectrum (400 MHz, CDCl<sub>3</sub>)

7.275  
7.256  
7.251  
7.242  
7.237  
7.228  
7.202  
6.905  
6.899  
6.893  
6.887  
6.883  
6.876  
6.867  
6.862  
6.854  
6.696

1.419  
1.413  
1.399  
1.394  
1.388  
1.380  
1.374  
1.187  
1.183  
1.173  
1.167  
1.163  
1.147  
1.144

—0.000

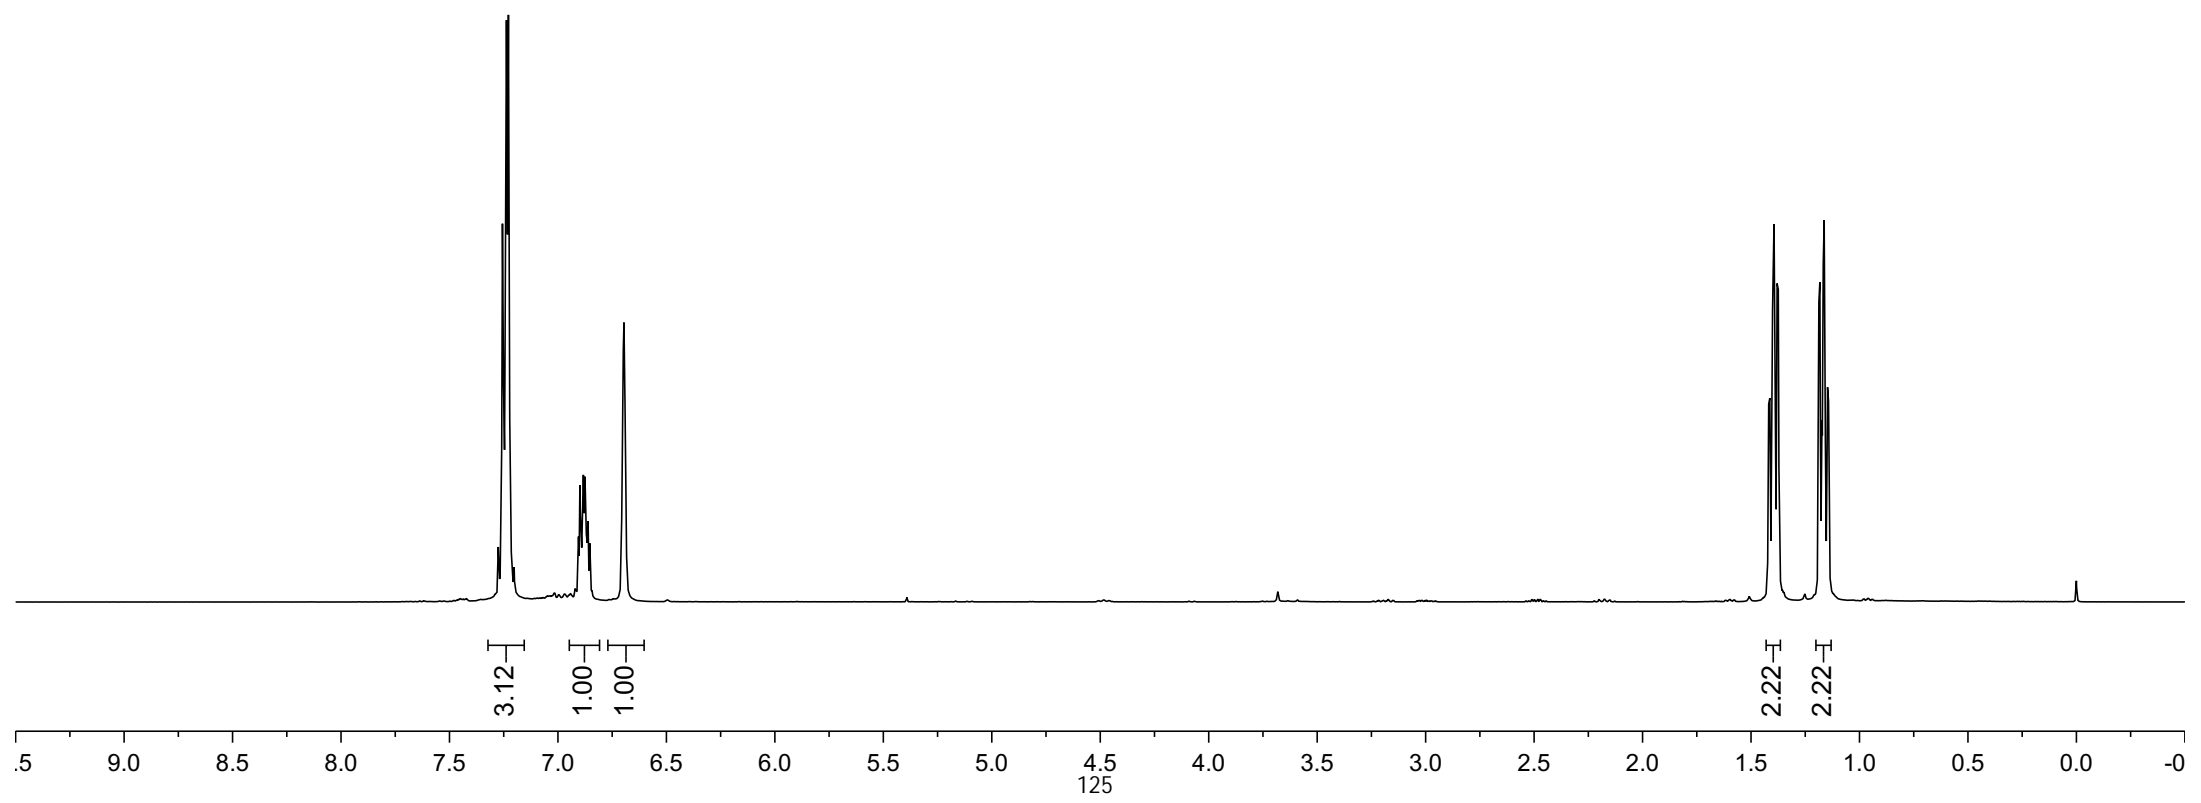

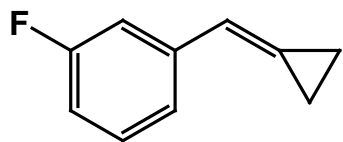

12

<sup>13</sup>C NMR spectrum (100 MHz, CDCl<sub>3</sub>)

164.30  
161.87

140.58  
140.50  
129.80  
129.71  
126.01  
122.49  
122.47  
117.34  
117.32  
113.51  
113.30  
112.88  
112.67

77.32  
77.00  
76.68

4.17  
0.56

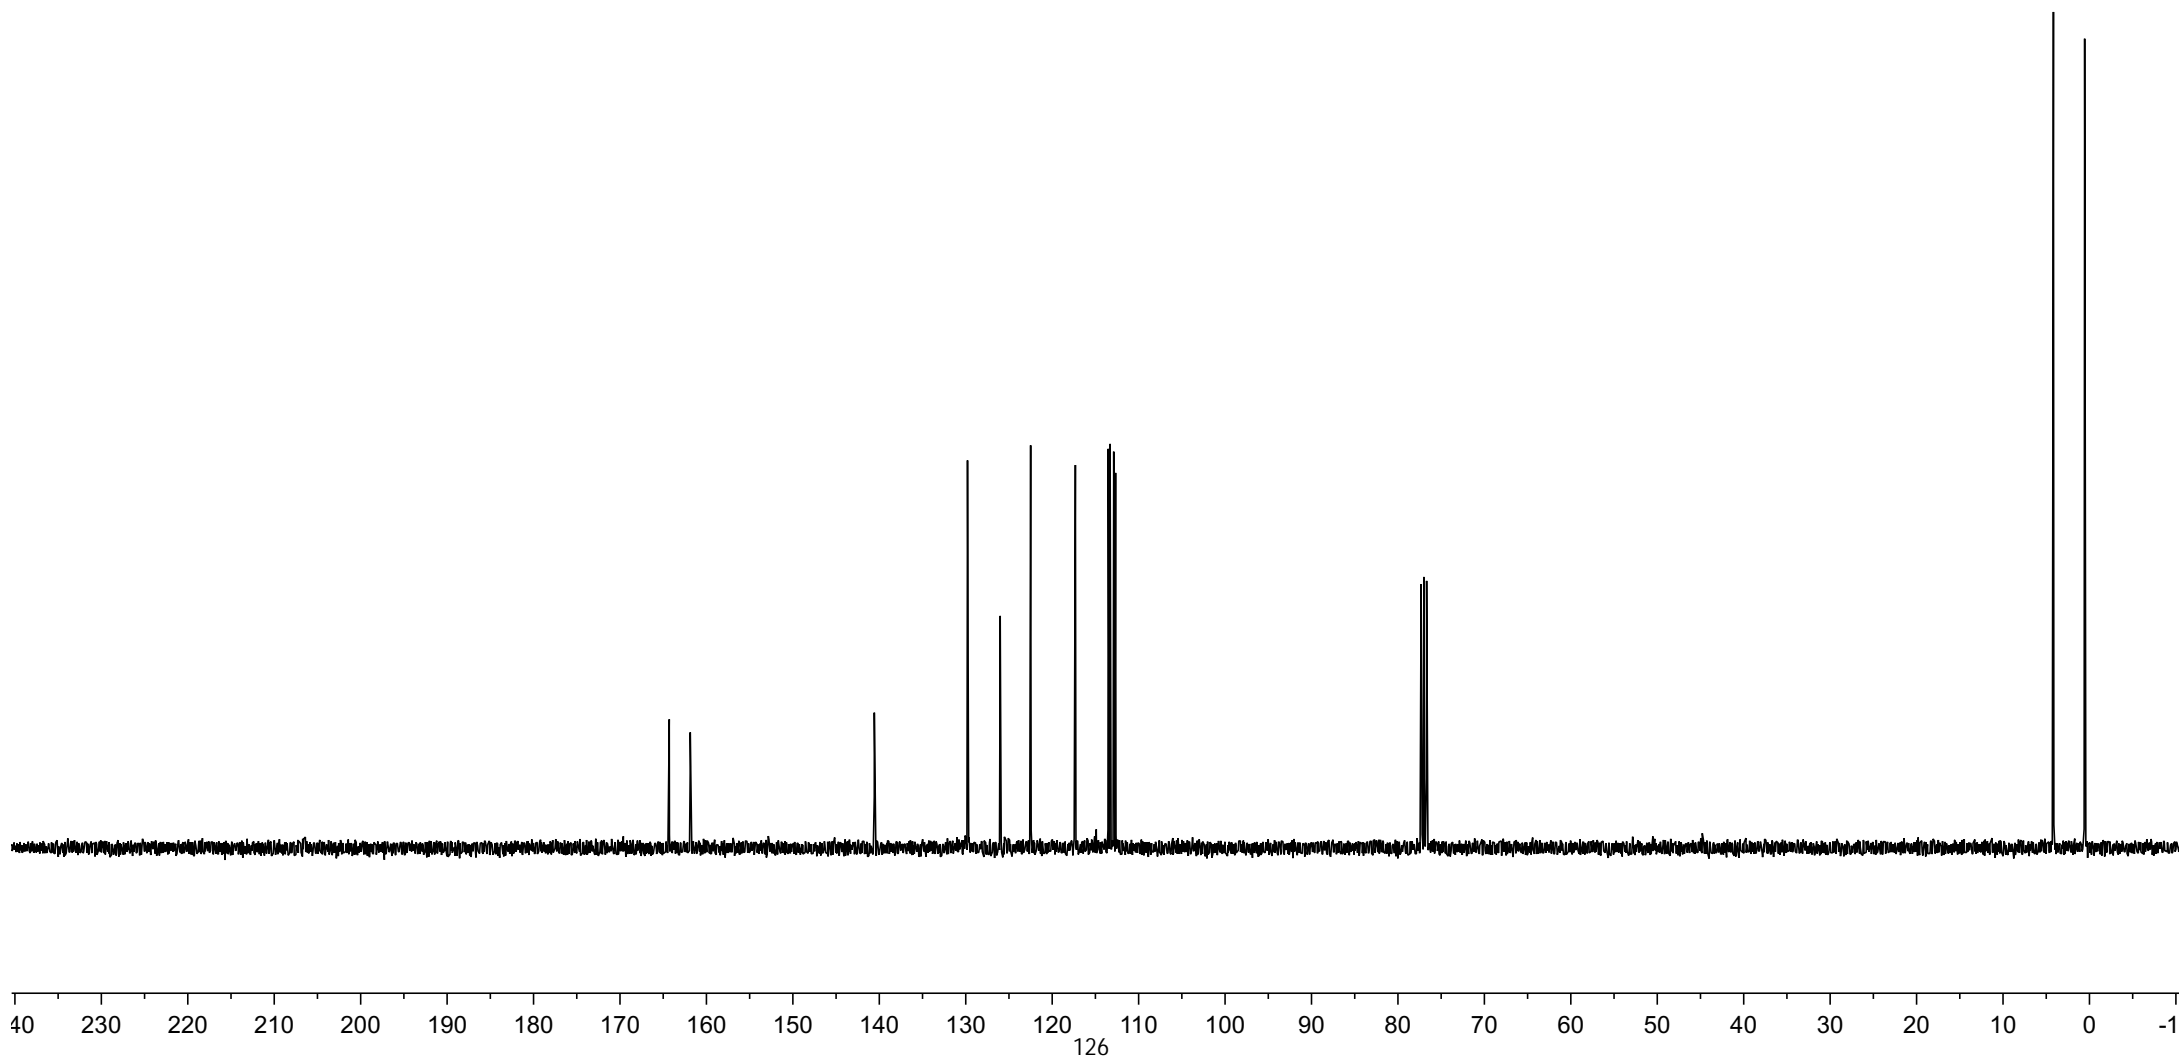

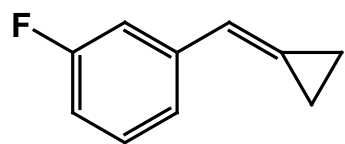

12

<sup>19</sup>F NMR spectrum (376 MHz, CDCl<sub>3</sub>)

---113.76

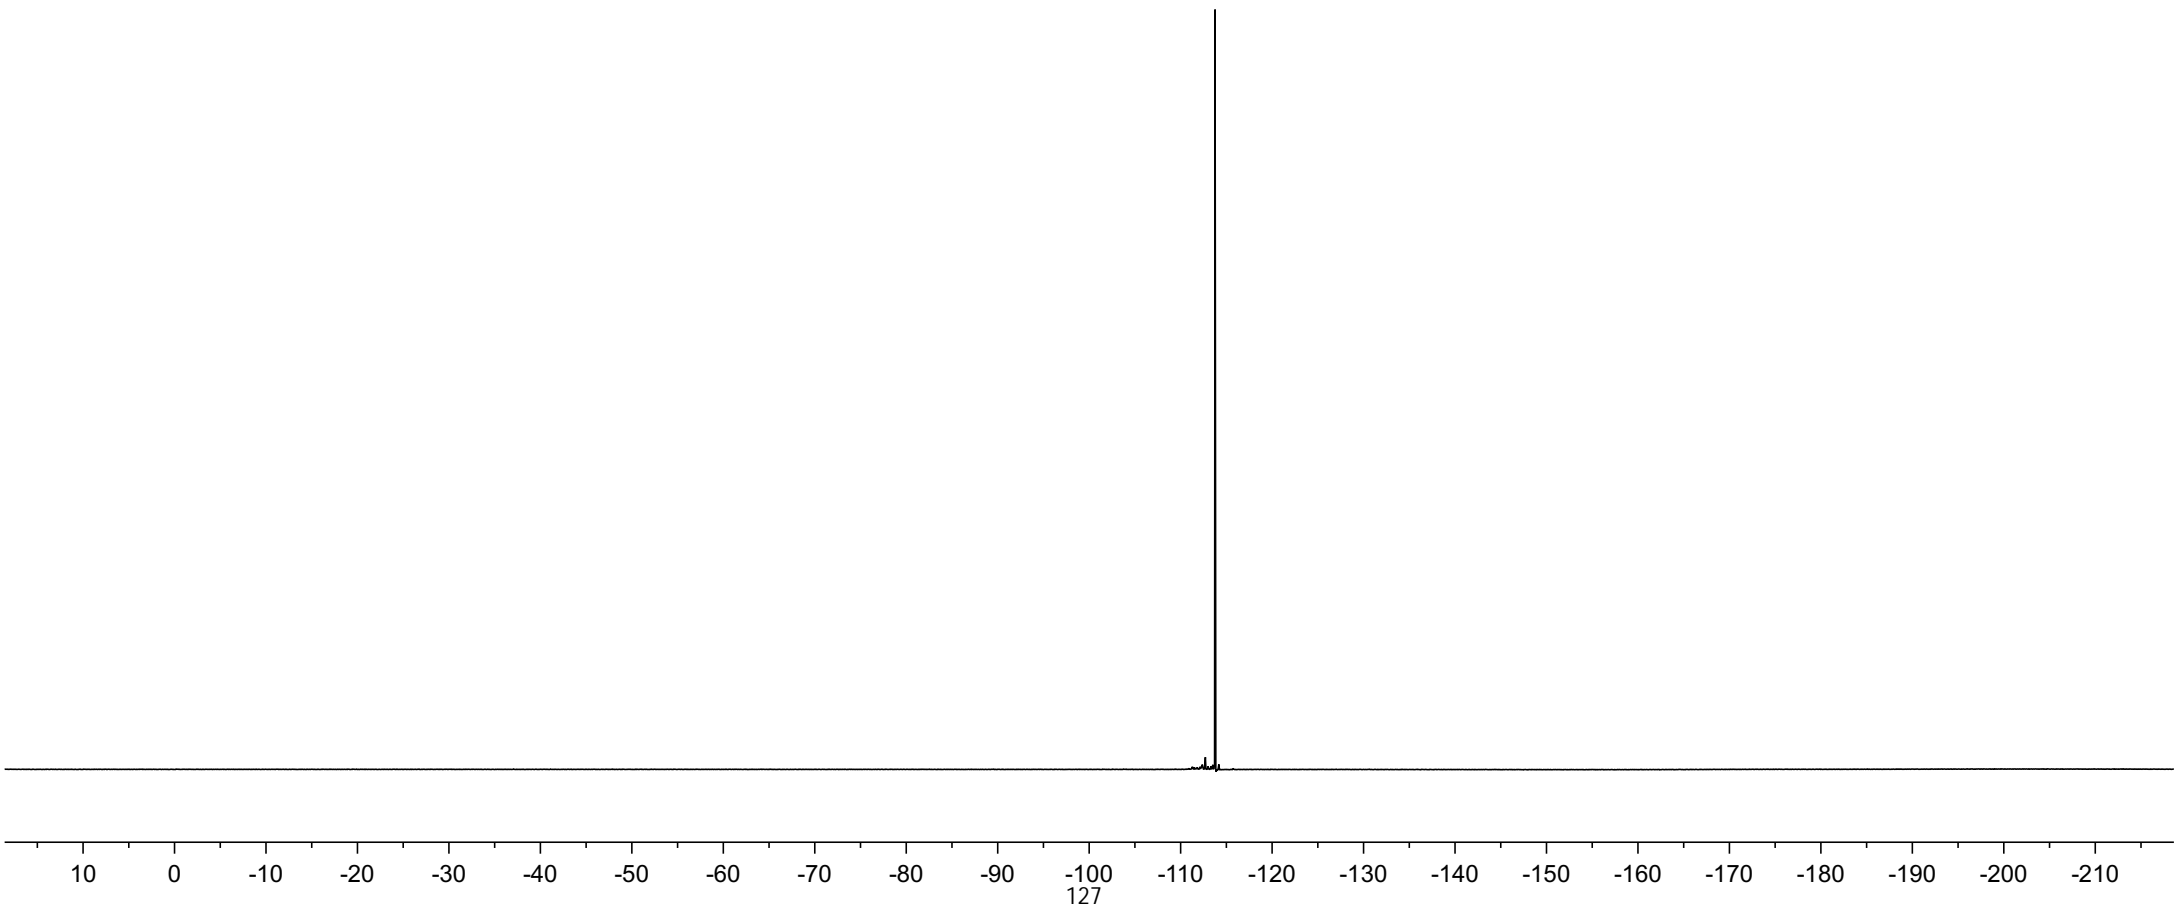

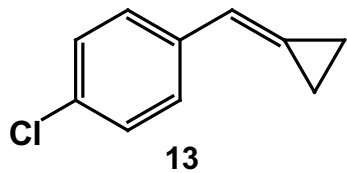

<sup>1</sup>H NMR spectrum (600 MHz, CDCl<sub>3</sub>)

7.431  
7.417  
7.270  
7.256  
6.685  
6.682  
6.679

1.394  
1.391  
1.381  
1.378  
1.374  
1.368  
1.365  
1.175  
1.172  
1.162  
1.159  
1.149

—0.000

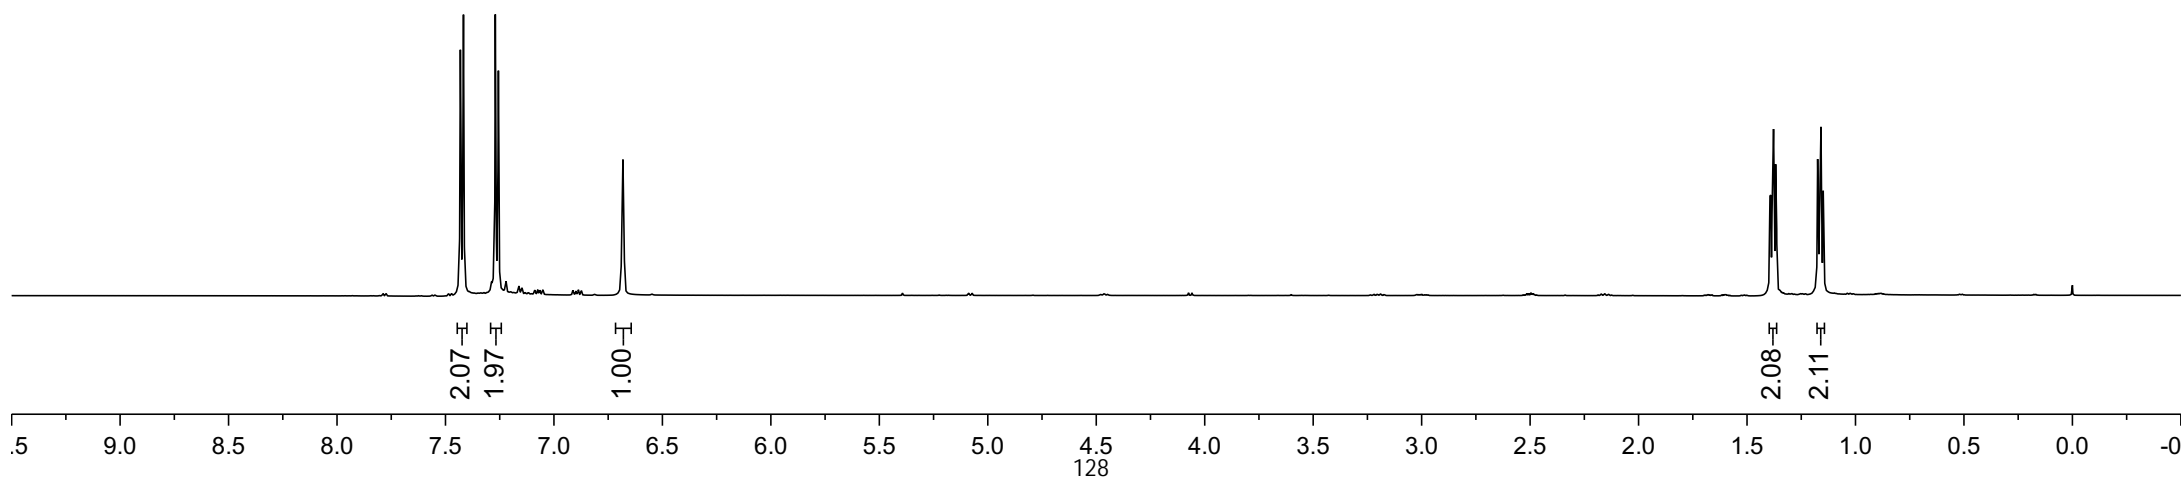

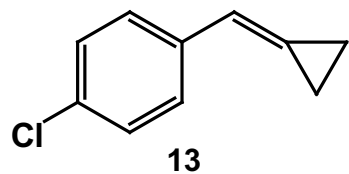

<sup>13</sup>C NMR spectrum (150 MHz, CDCl<sub>3</sub>)

136.70  
132.18  
128.52  
127.71  
125.11  
117.18

77.21  
77.00  
76.79

4.12  
0.58

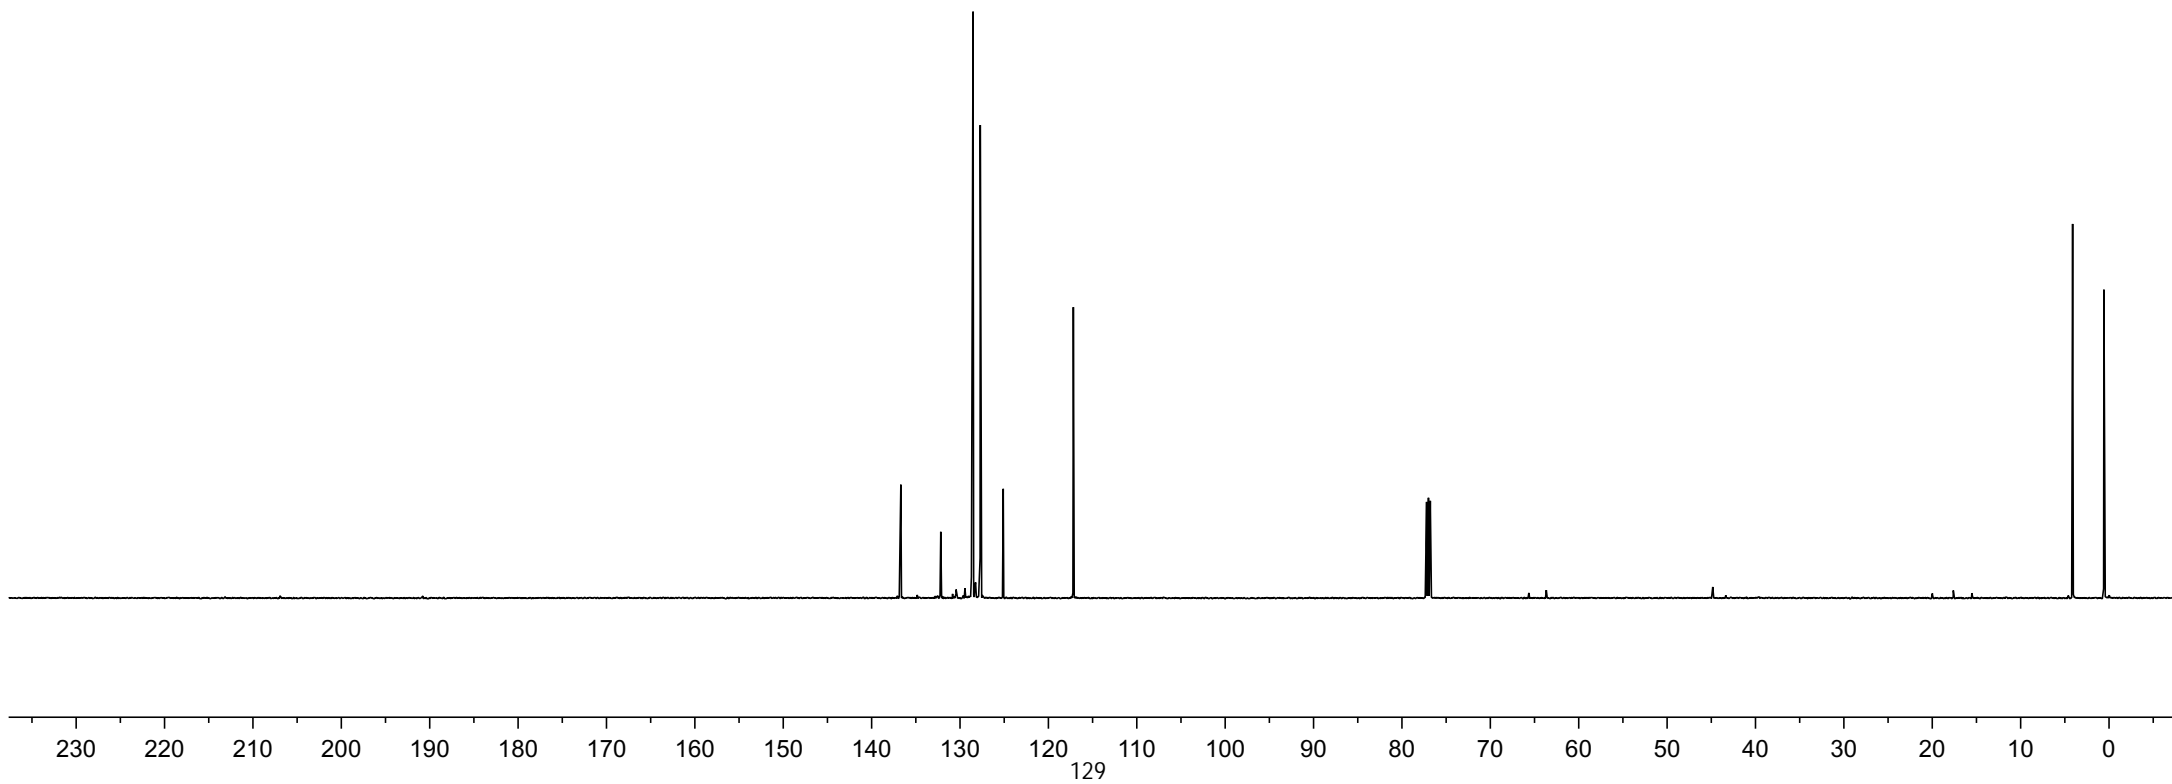

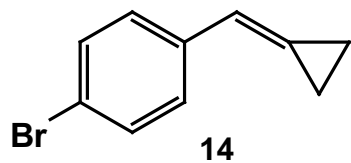

<sup>1</sup>H NMR spectrum (600 MHz, CDCl<sub>3</sub>)

7.431  
7.417  
7.381  
7.367  
7.239  
6.684  
6.681  
6.677  
6.673  
6.670

1.399  
1.396  
1.386  
1.382  
1.378  
1.373  
1.369  
1.176  
1.174  
1.167  
1.164  
1.160  
1.150  
1.147

—0.000

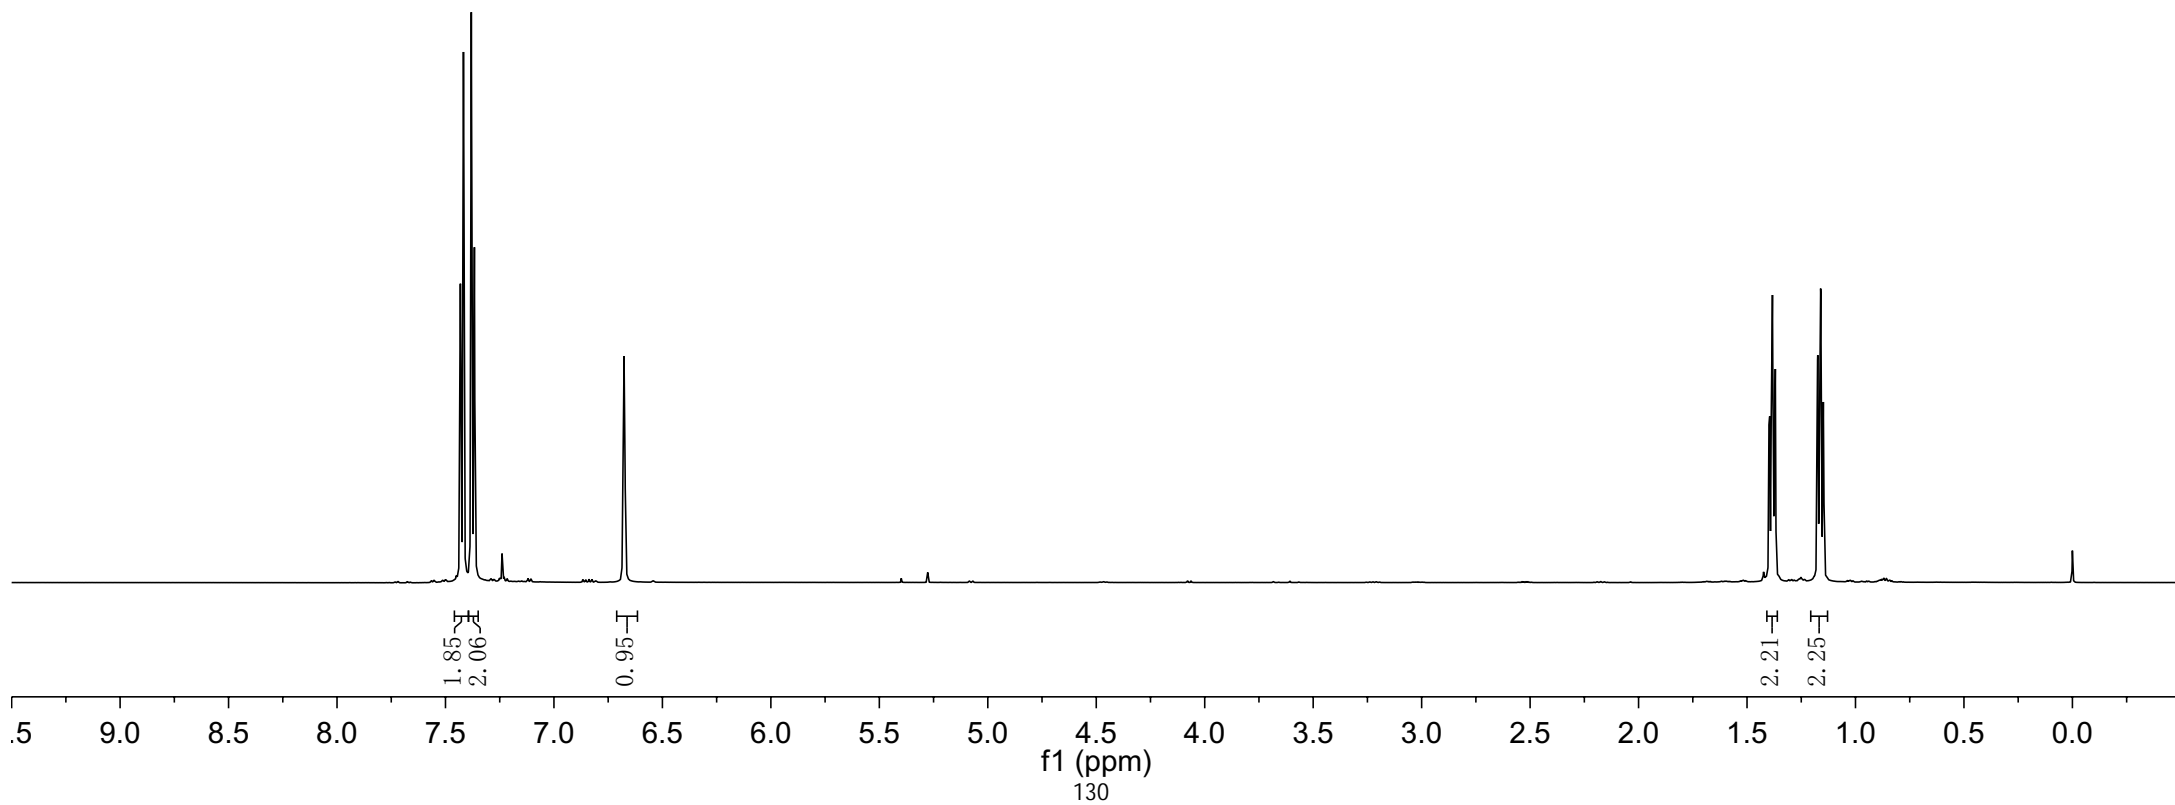

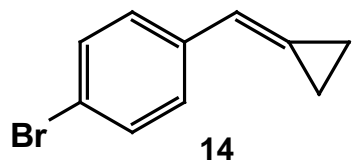

<sup>13</sup>C NMR spectrum (150 MHz, CDCl<sub>3</sub>)

137.13  
131.48  
128.06  
125.35  
120.31  
117.24

77.21  
77.00  
76.79

4.17  
0.61

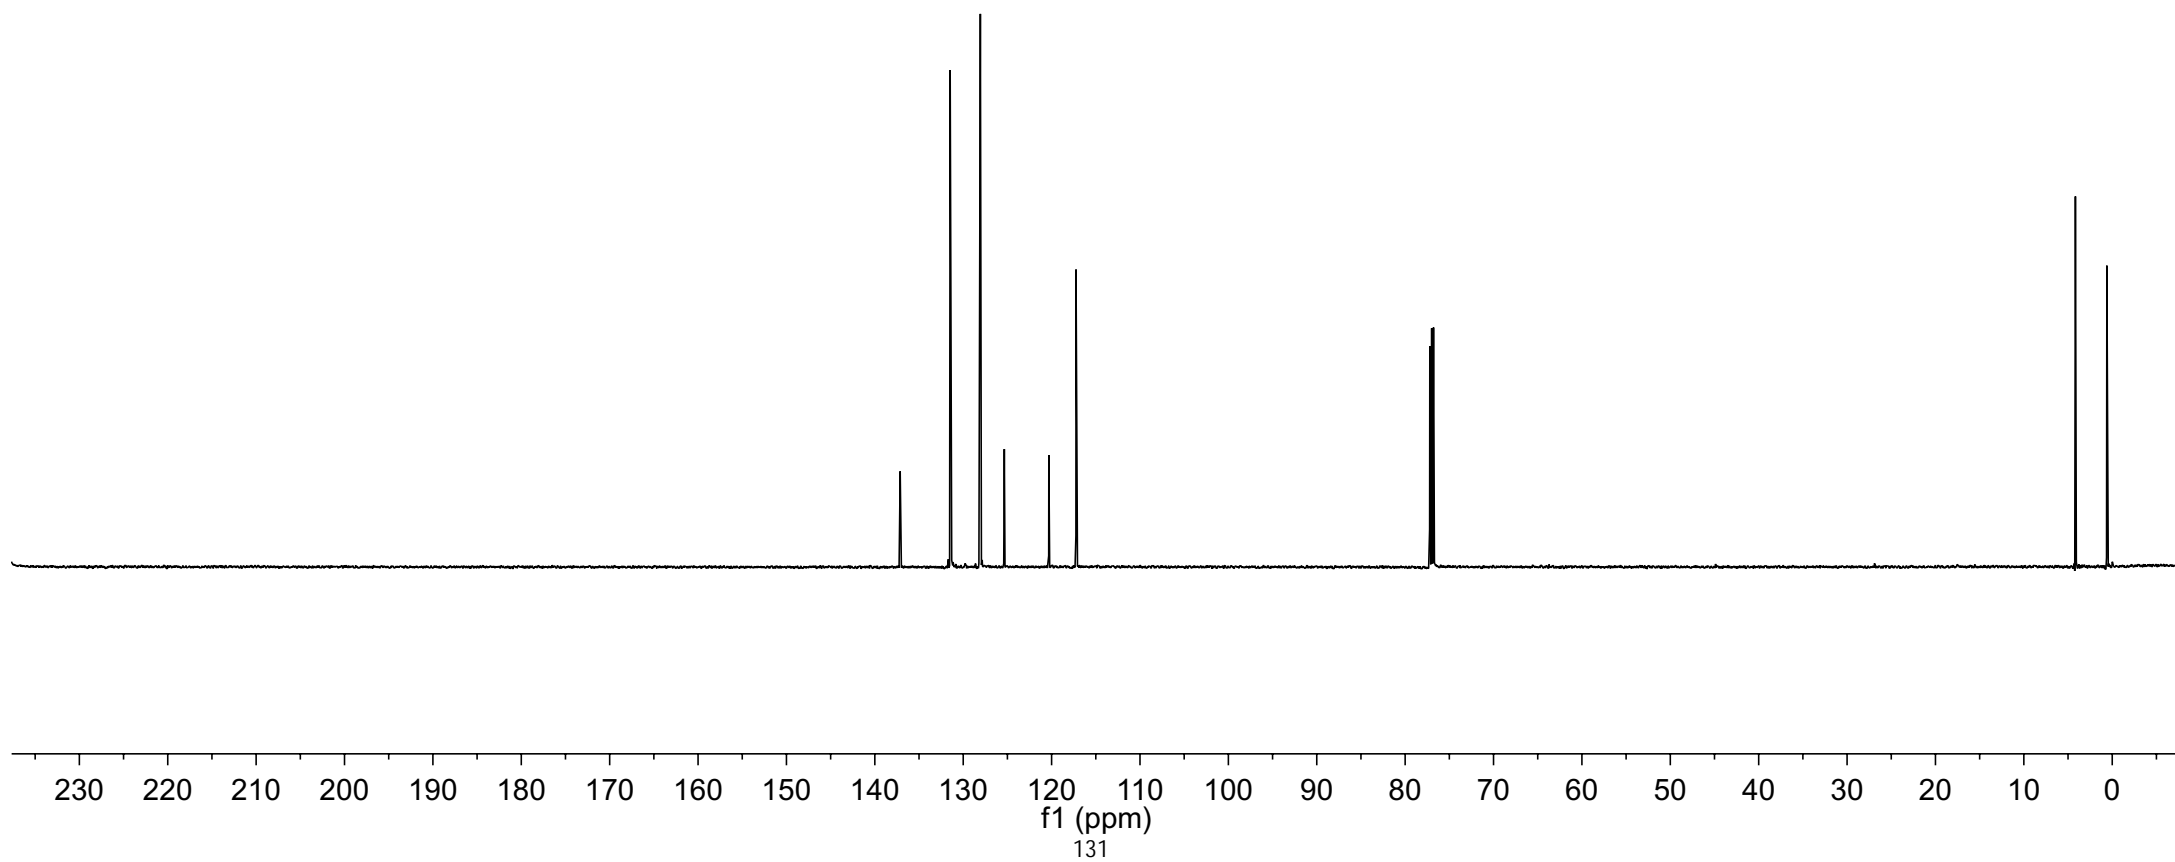



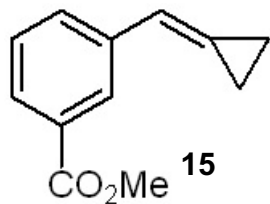

<sup>1</sup>H NMR spectrum (600 MHz, CDCl<sub>3</sub>)

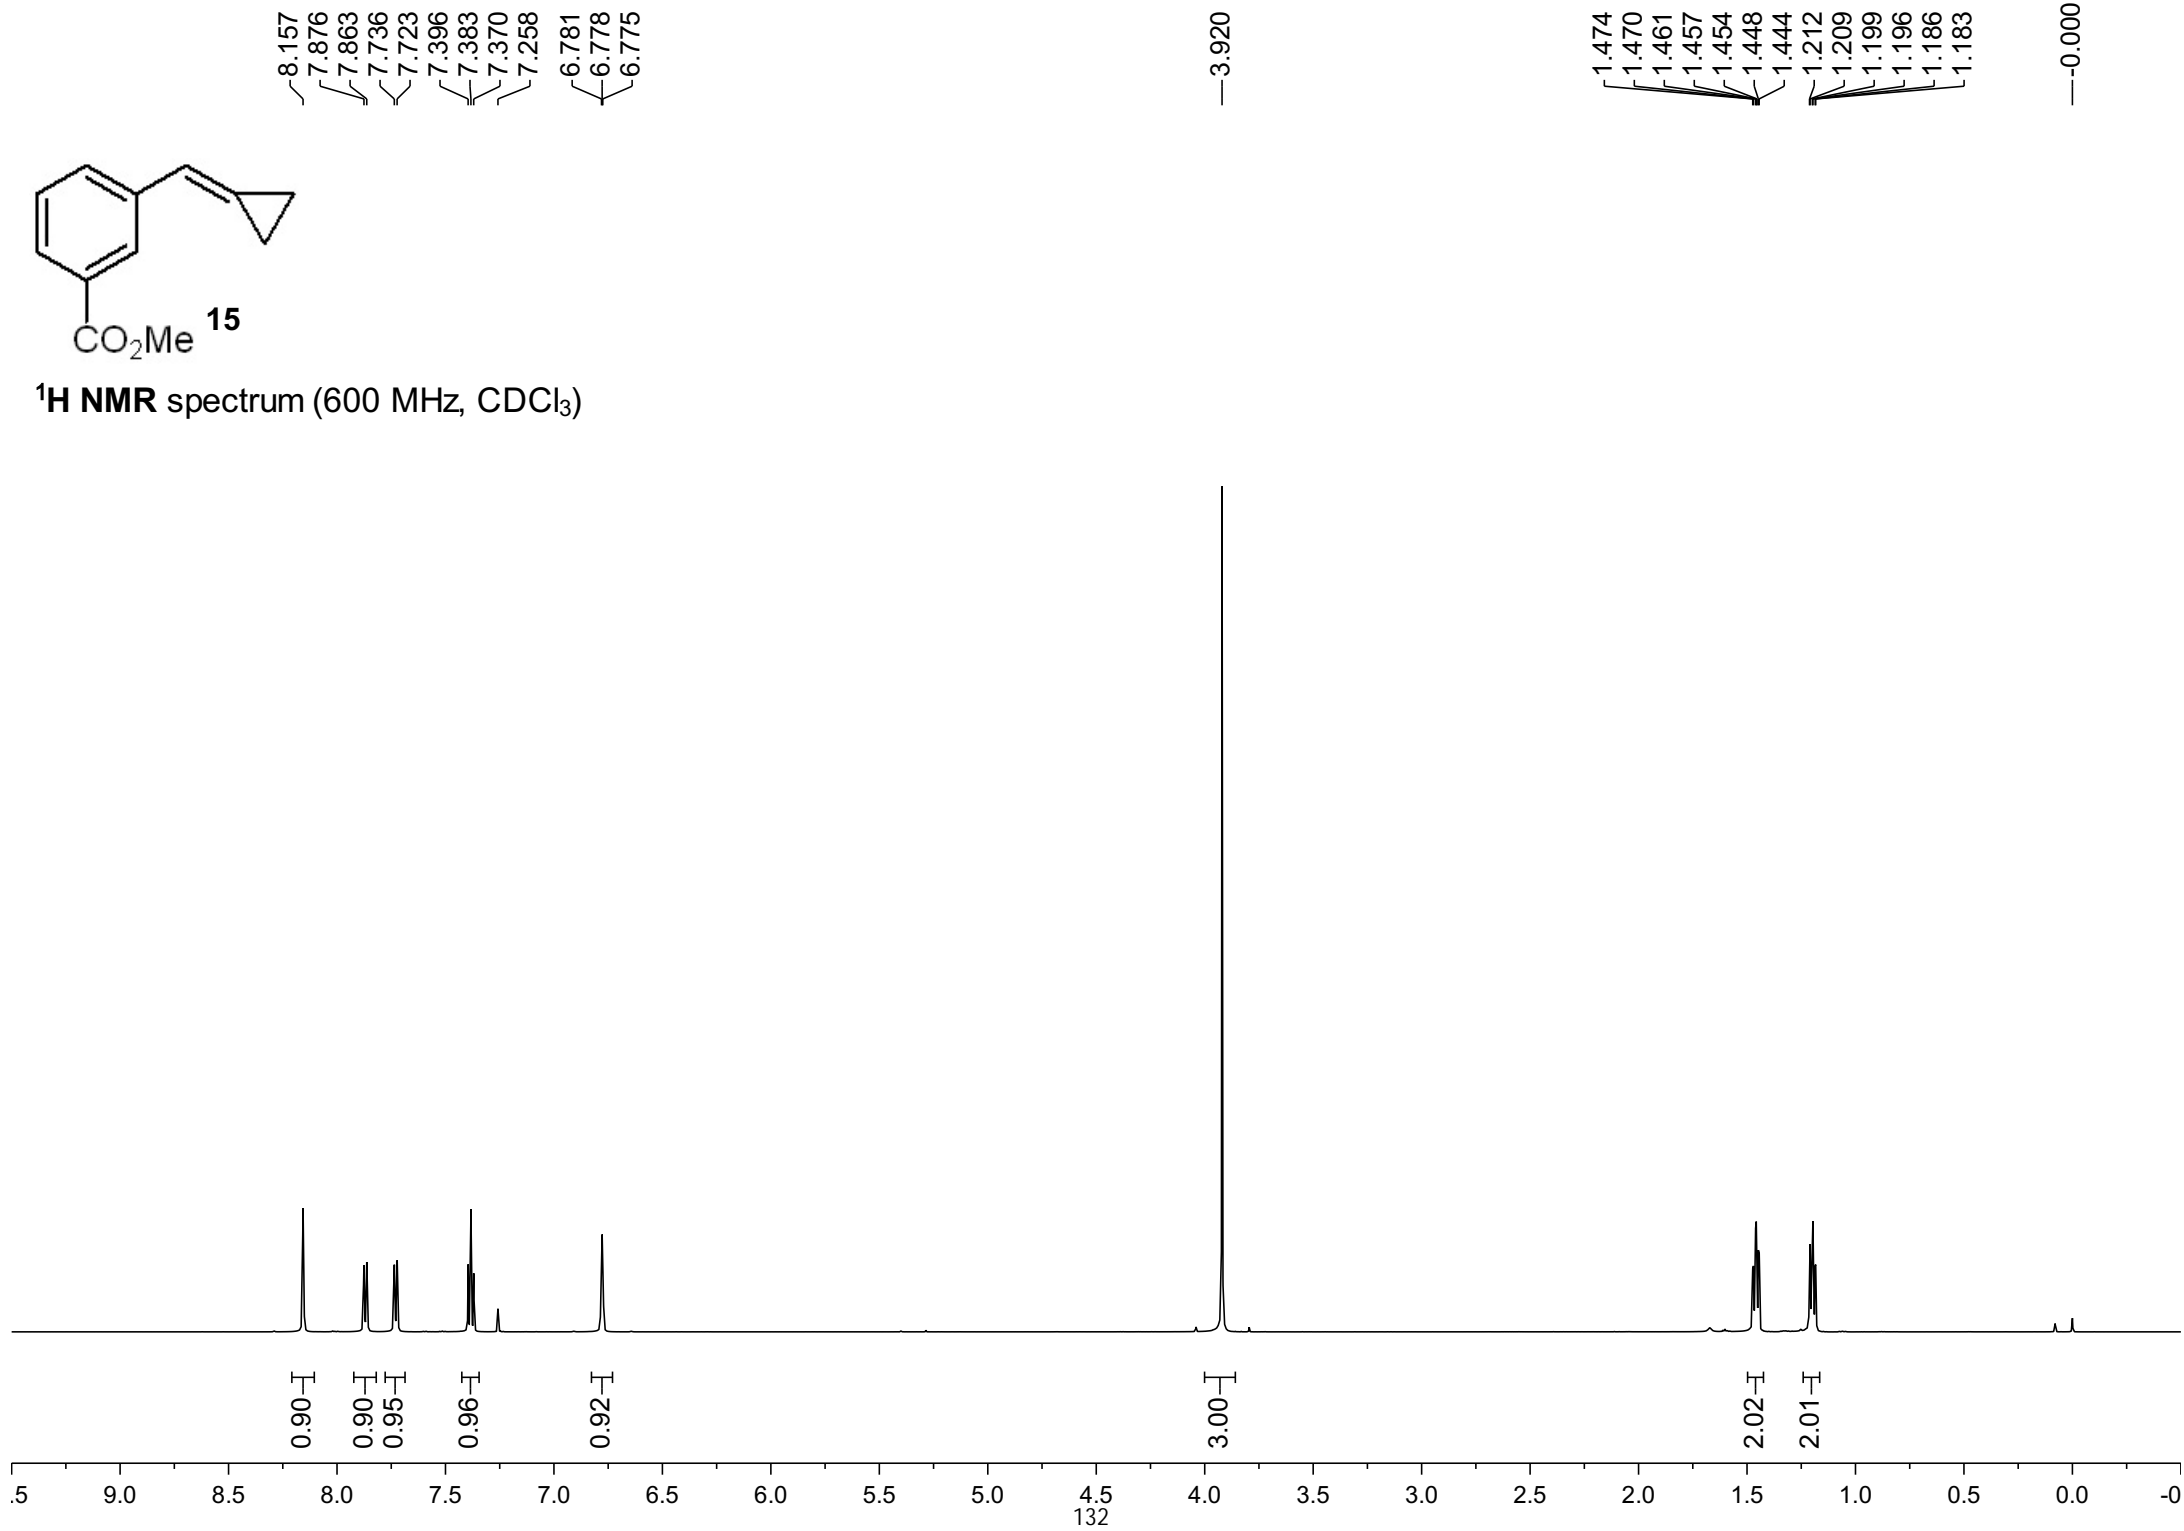

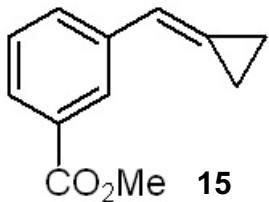

<sup>13</sup>C NMR spectrum (150 MHz, CDCl<sub>3</sub>)

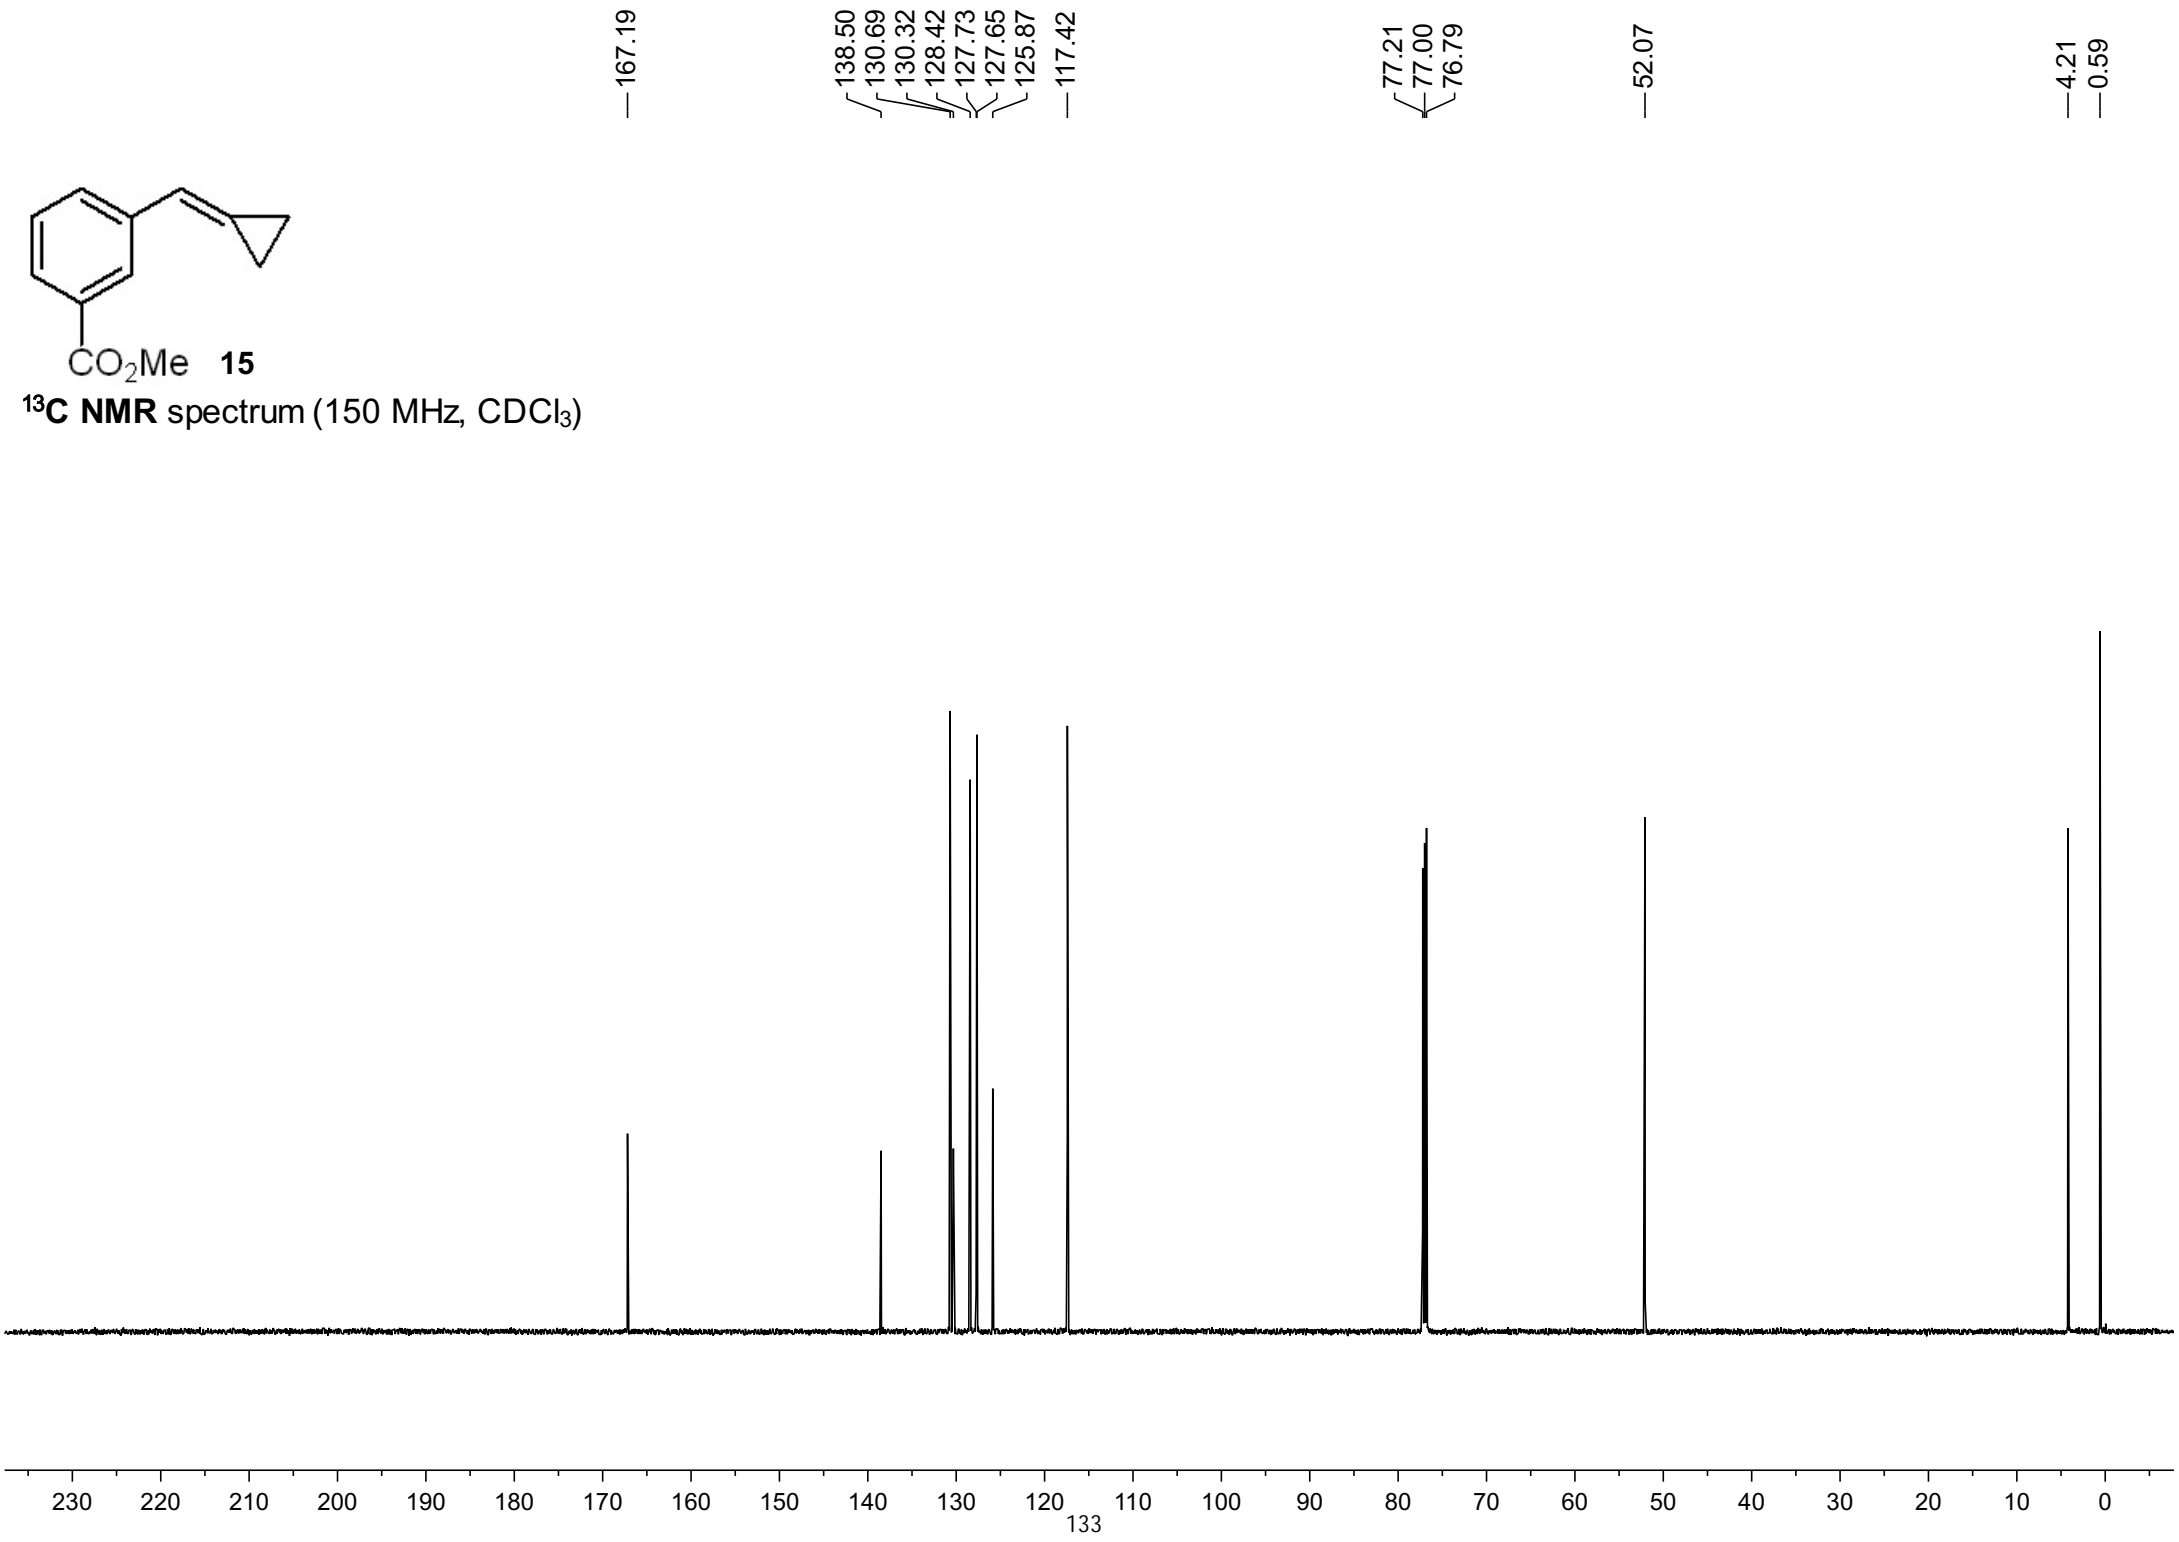

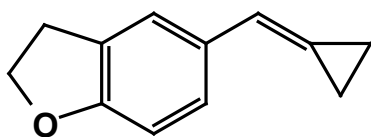

16

<sup>1</sup>H NMR spectrum (400 MHz, CDCl<sub>3</sub>)

7.421  
7.268  
7.250  
6.757  
6.737  
6.682  
6.677  
6.672

4.589  
4.567  
4.545

3.227  
3.205  
3.183

1.396  
1.390  
1.377  
1.372  
1.366  
1.359  
1.353  
1.165  
1.161  
1.153  
1.147  
1.142  
1.128  
1.124

—0.000

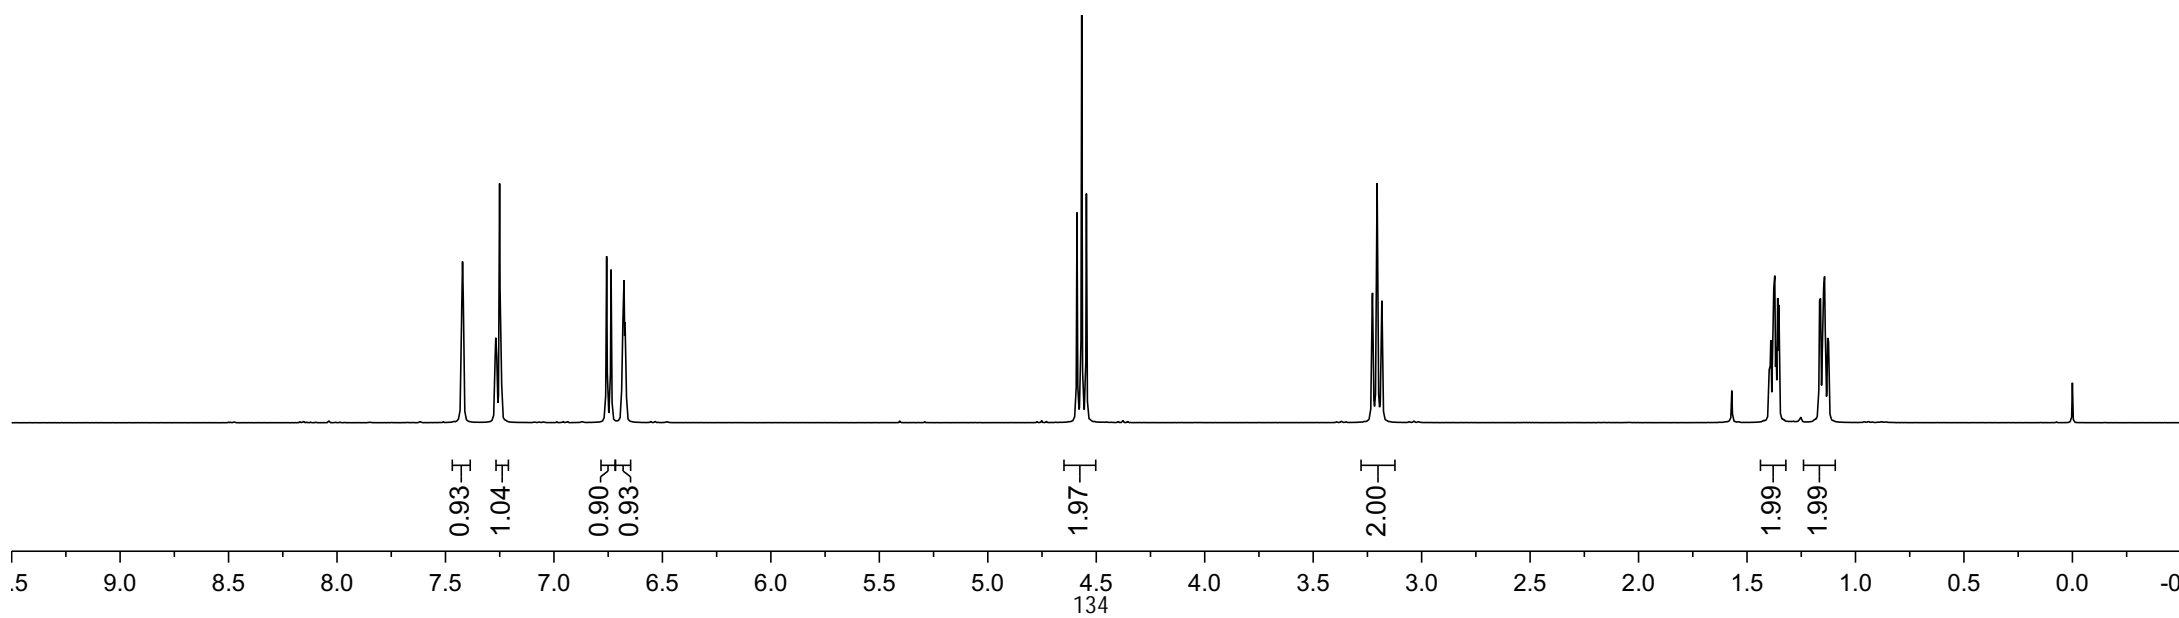

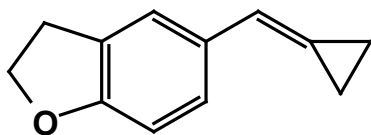

16

<sup>13</sup>C NMR spectrum (100 MHz, CDCl<sub>3</sub>)

— 159.06

131.20

127.21

126.77

122.80

120.85

117.87

— 109.10

77.32

77.00

76.68

71.31

— 29.68

— 4.05

— 0.49

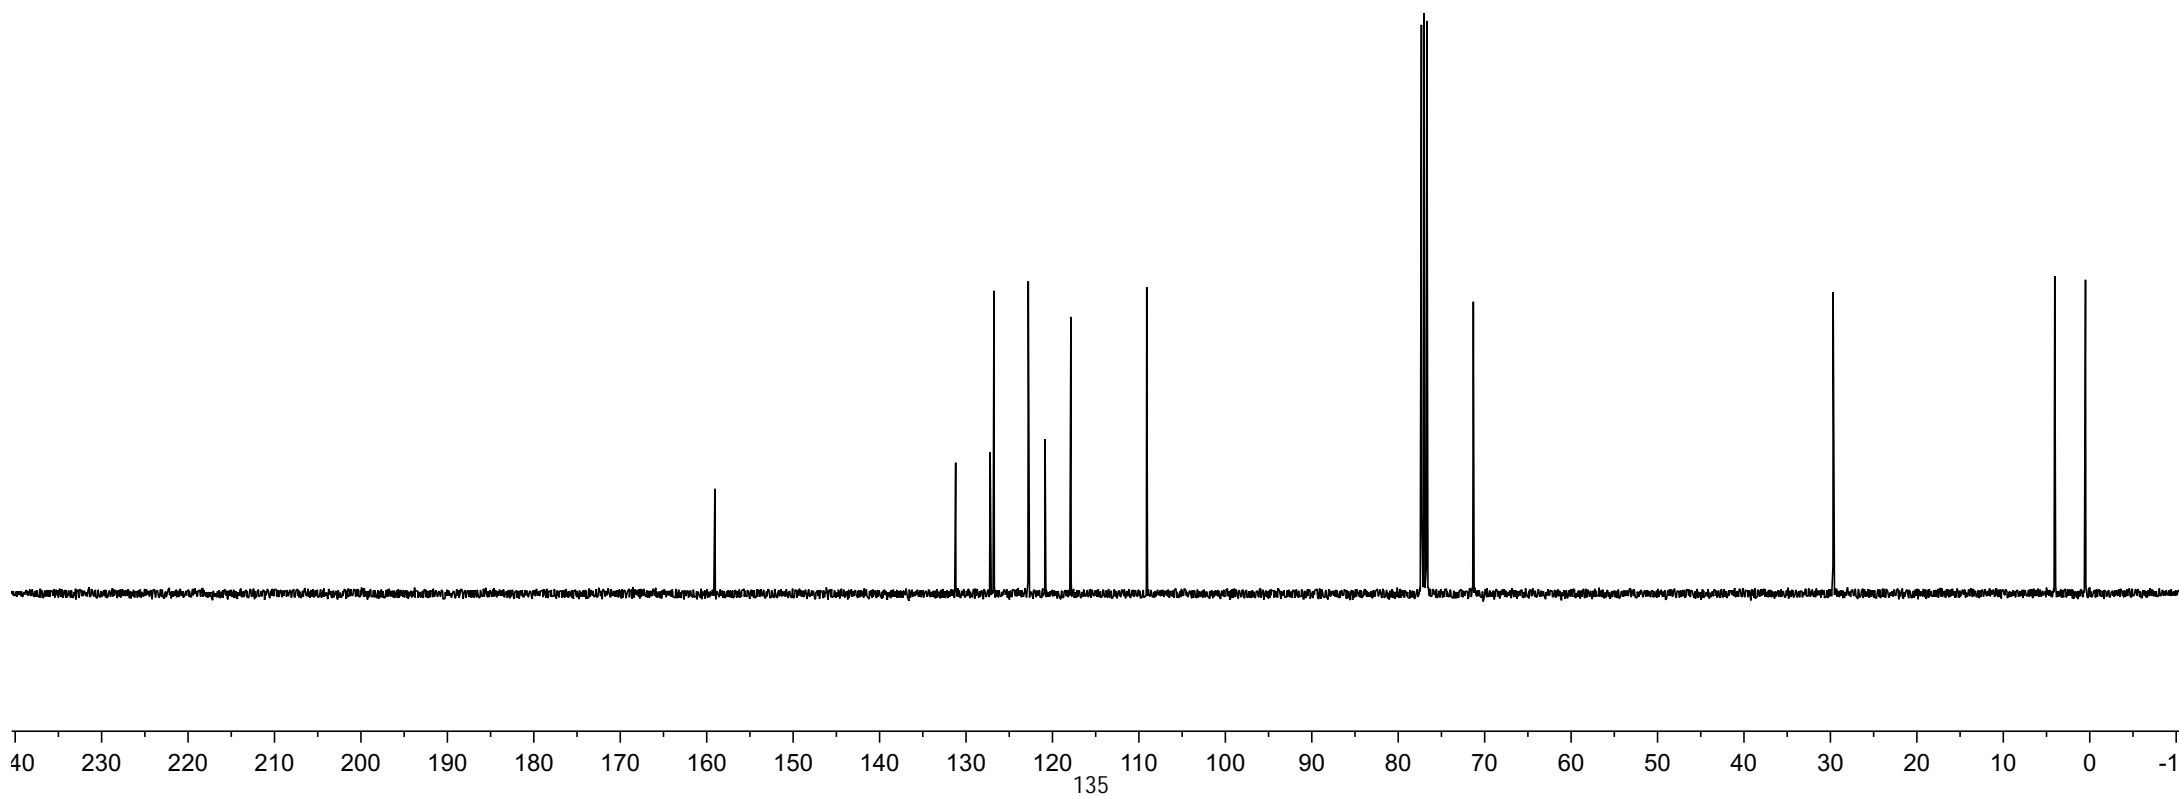

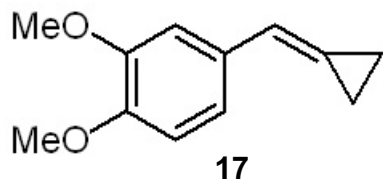

**<sup>1</sup>H NMR spectrum (600 MHz, CDCl<sub>3</sub>)**

7.255  
7.143  
7.140  
7.040  
7.036  
7.026  
7.023  
6.832  
6.819  
6.683  
6.680  
6.676  
6.673  
6.669

3.894  
3.869

1.404  
1.400  
1.394  
1.391  
1.388  
1.384  
1.379  
1.375  
1.175  
1.172  
1.167  
1.163  
1.160  
1.157  
1.150  
1.147

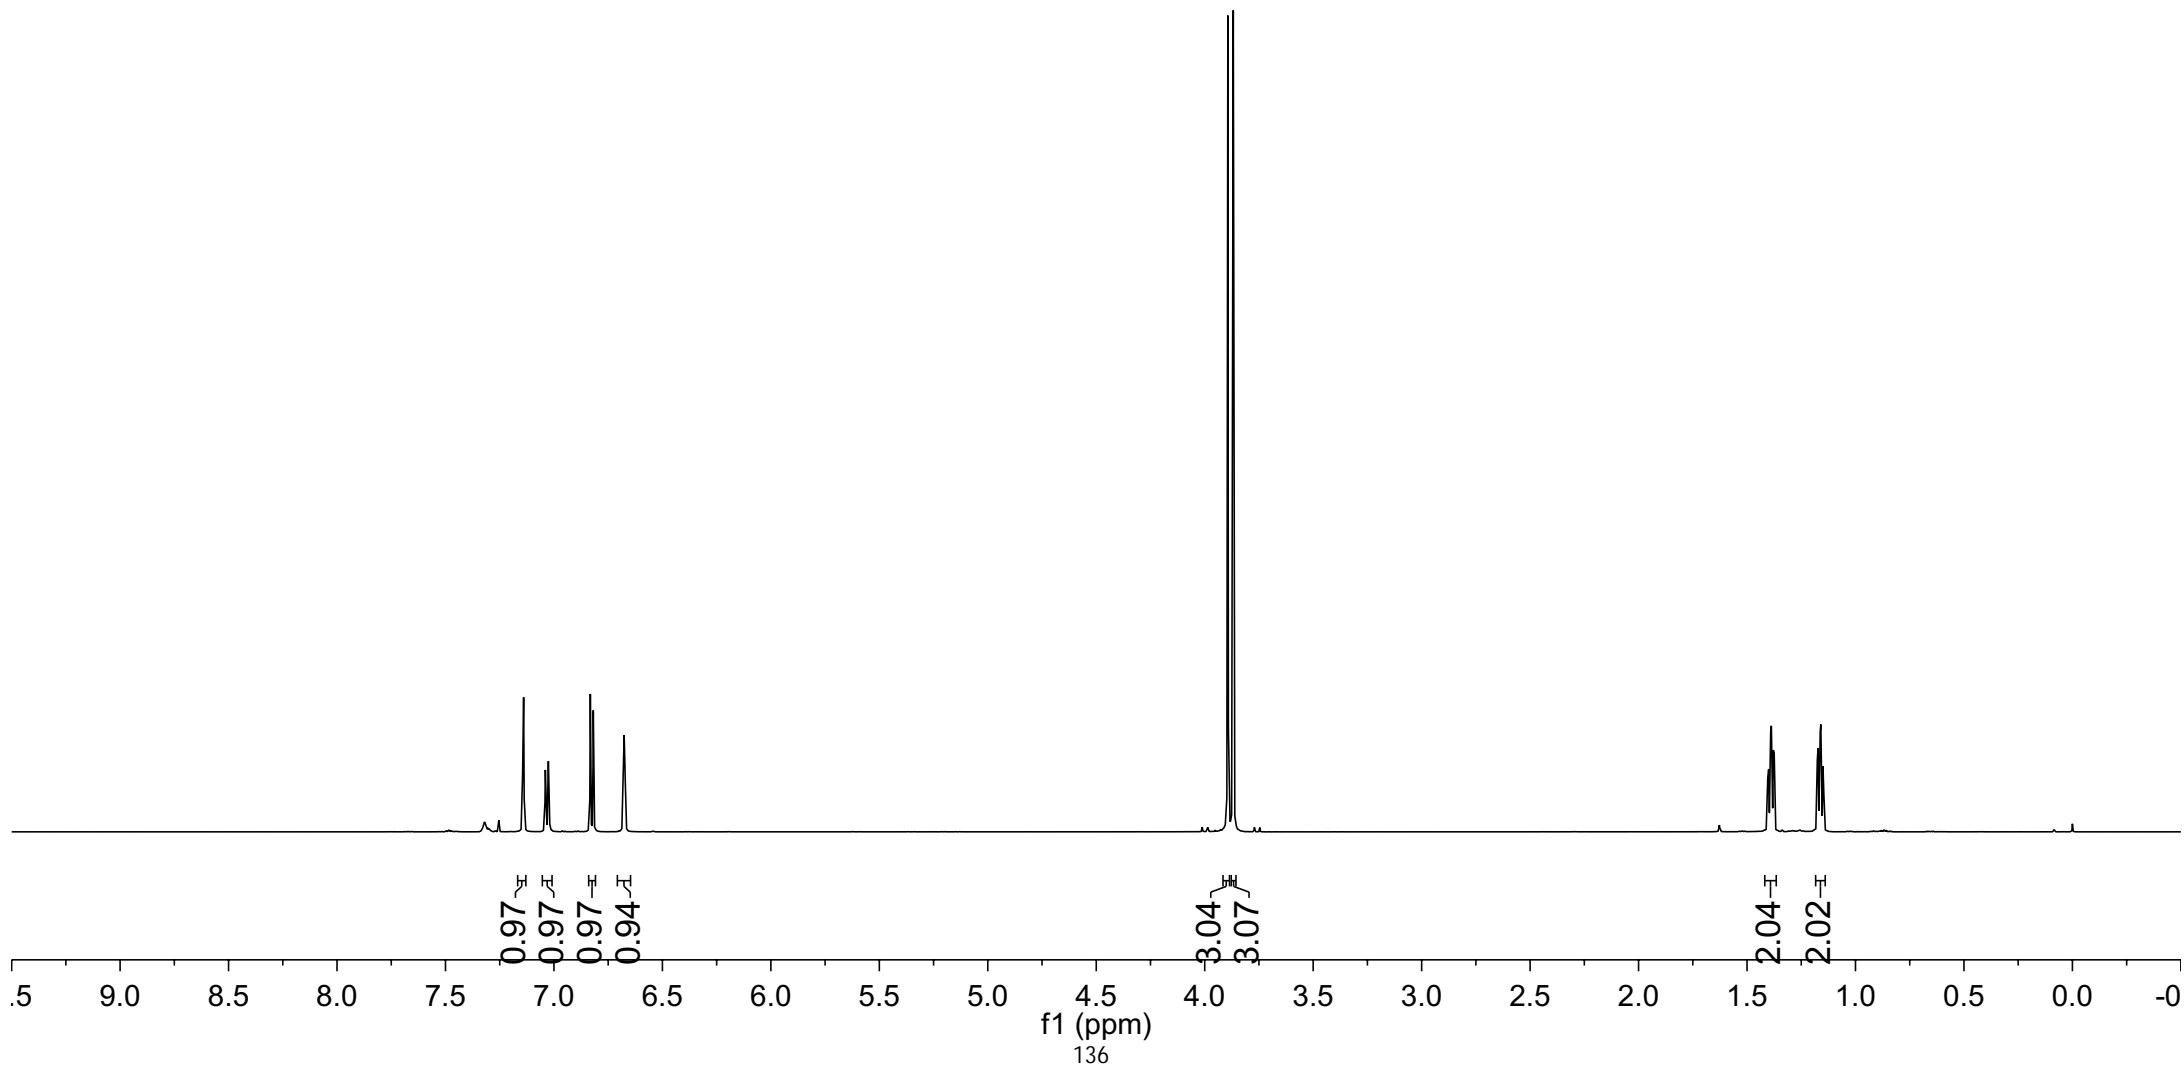

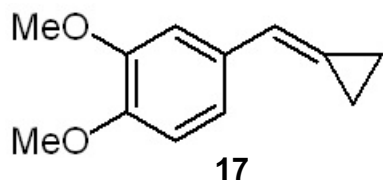

<sup>13</sup>C NMR spectrum (150 MHz, CDCl<sub>3</sub>)

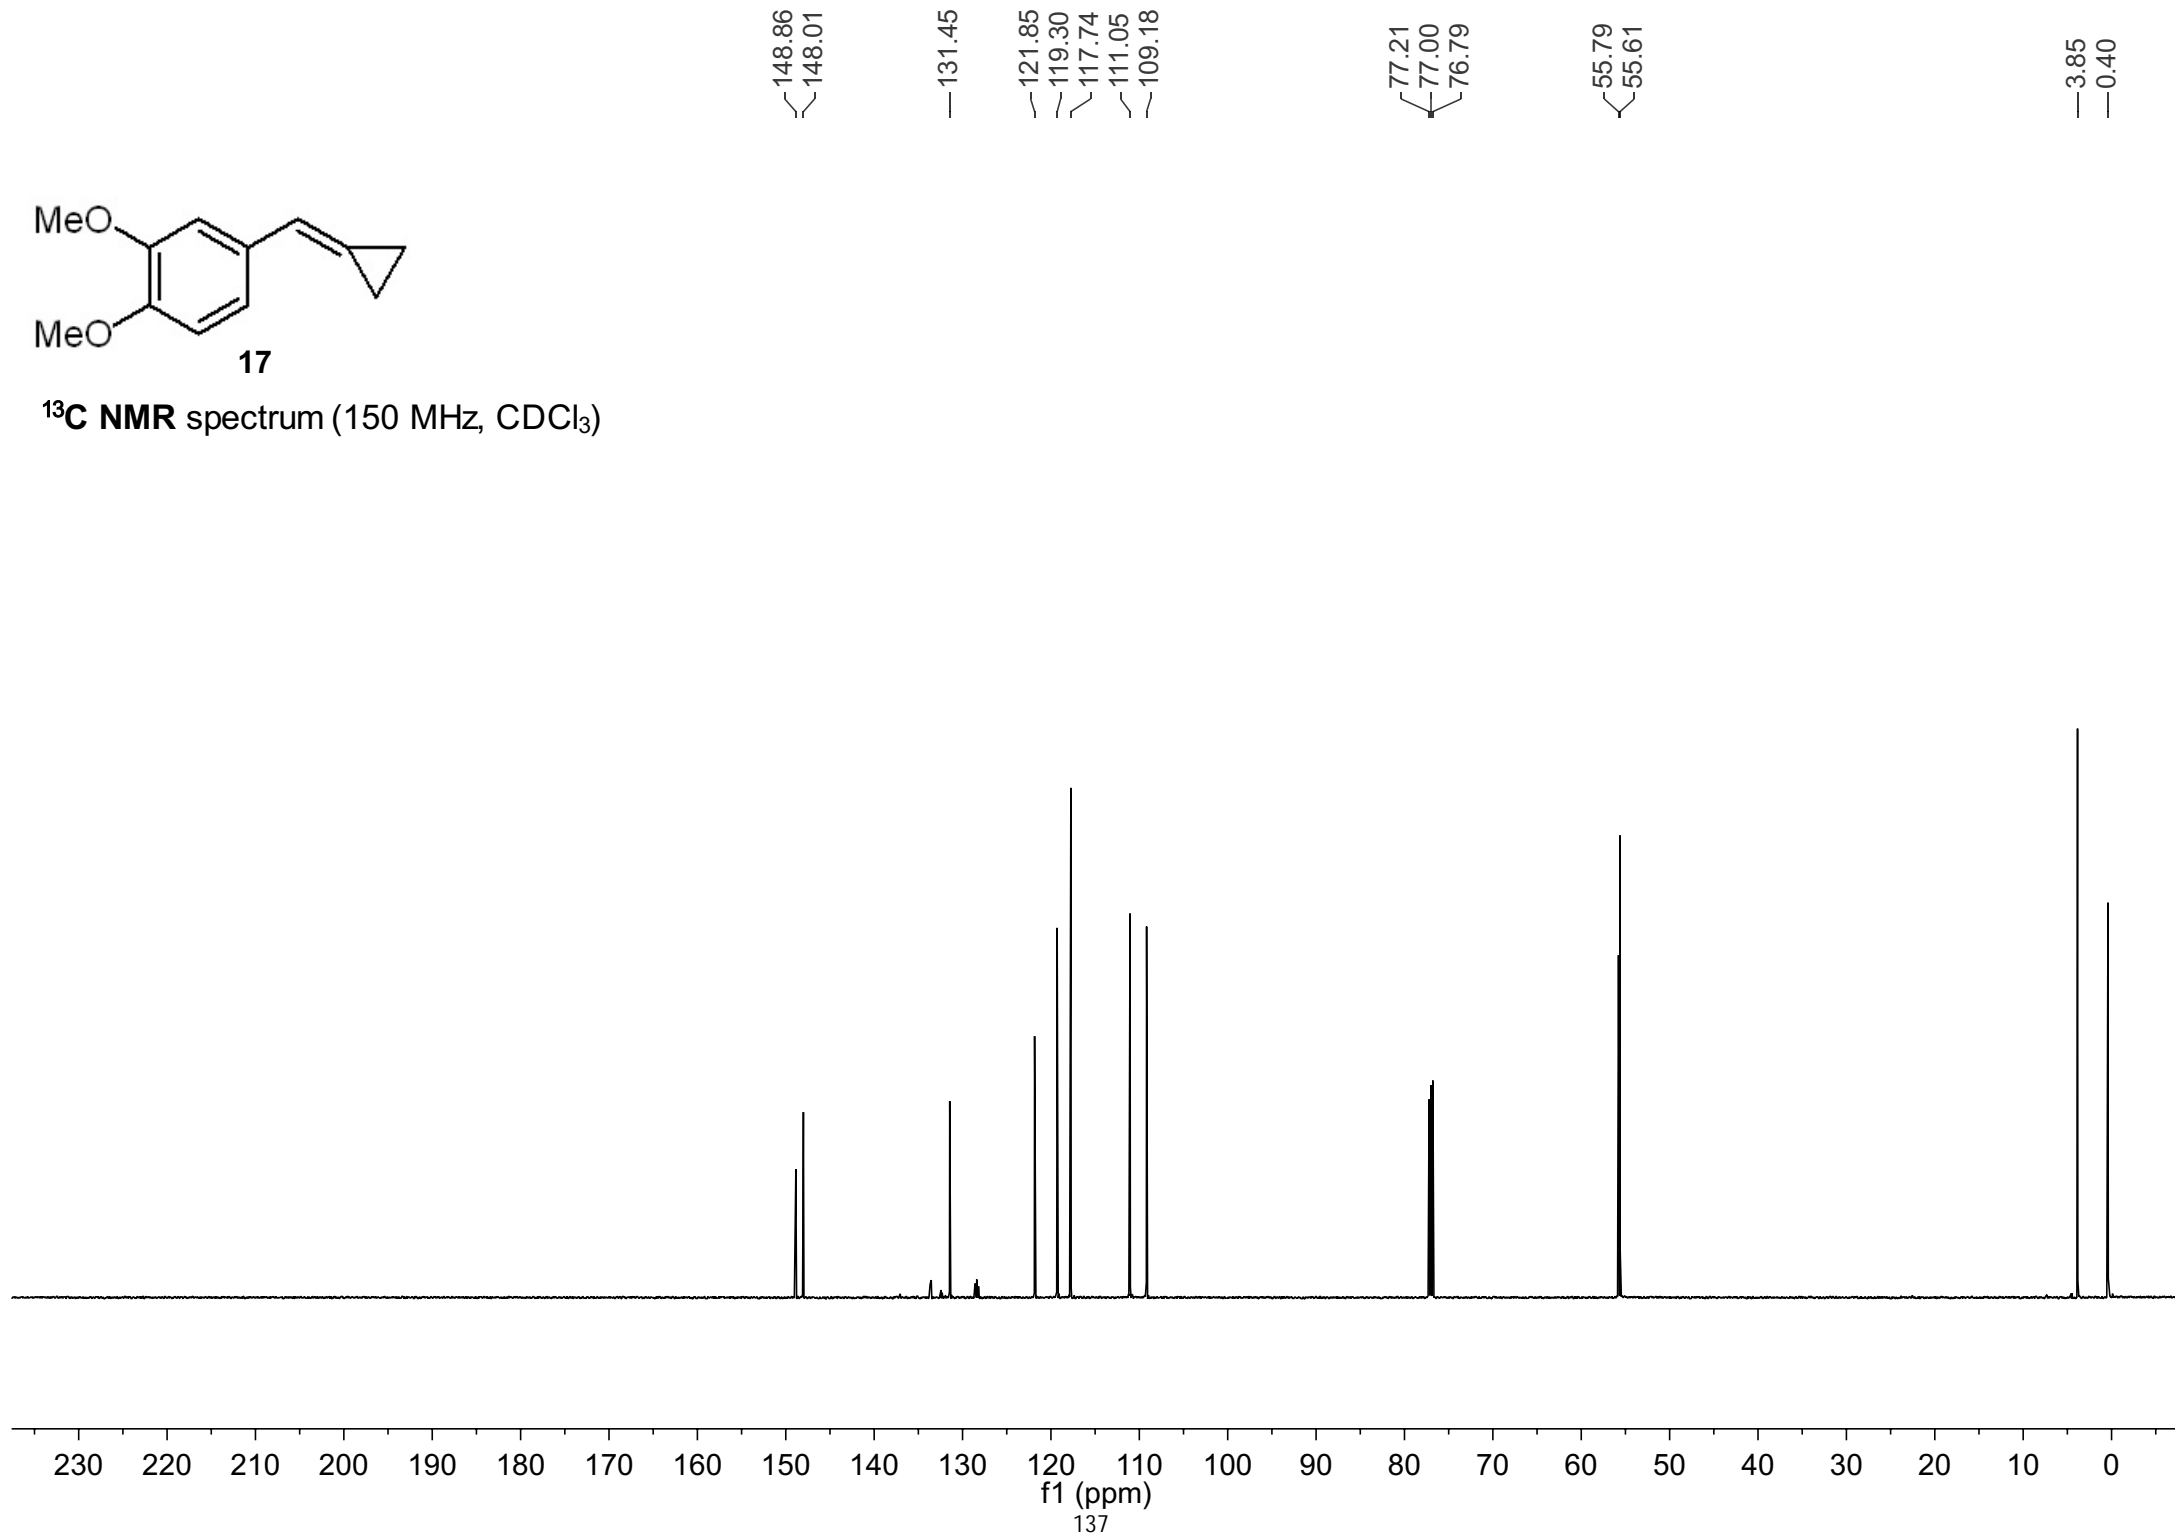

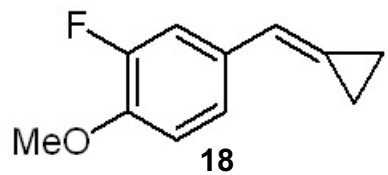

<sup>1</sup>H NMR spectrum (600 MHz, CDCl<sub>3</sub>)

7.325  
7.322  
7.304  
7.301  
7.239  
7.145  
7.131  
6.900  
6.886  
6.871  
6.629

3.861

1.382  
1.379  
1.369  
1.366  
1.362  
1.357  
1.353  
1.163  
1.160  
1.154  
1.150  
1.147  
1.137  
1.135

-0.000

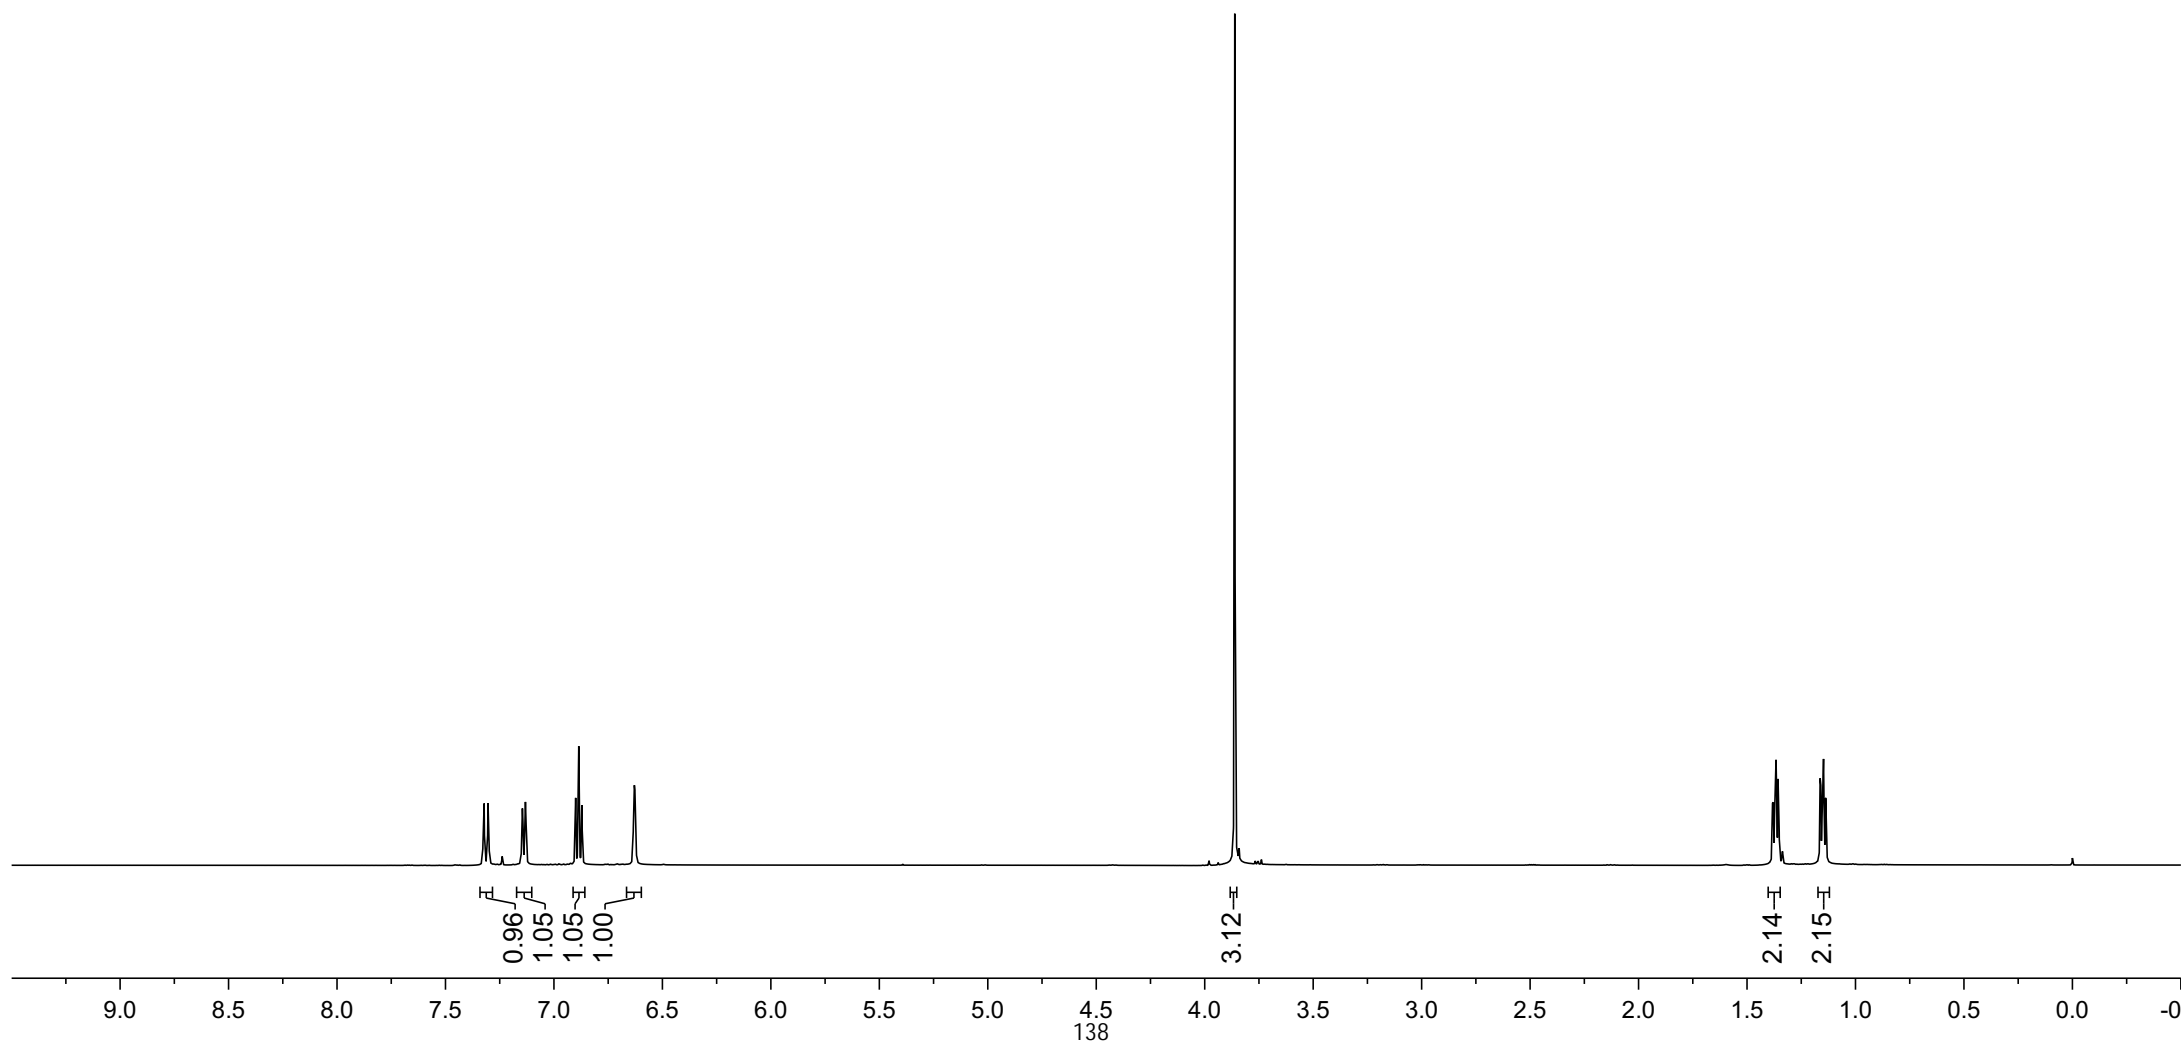

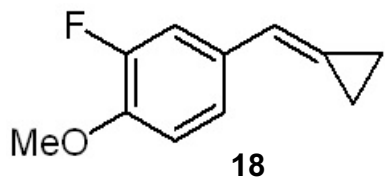

**<sup>13</sup>C NMR spectrum (150 MHz, CDCl<sub>3</sub>)**

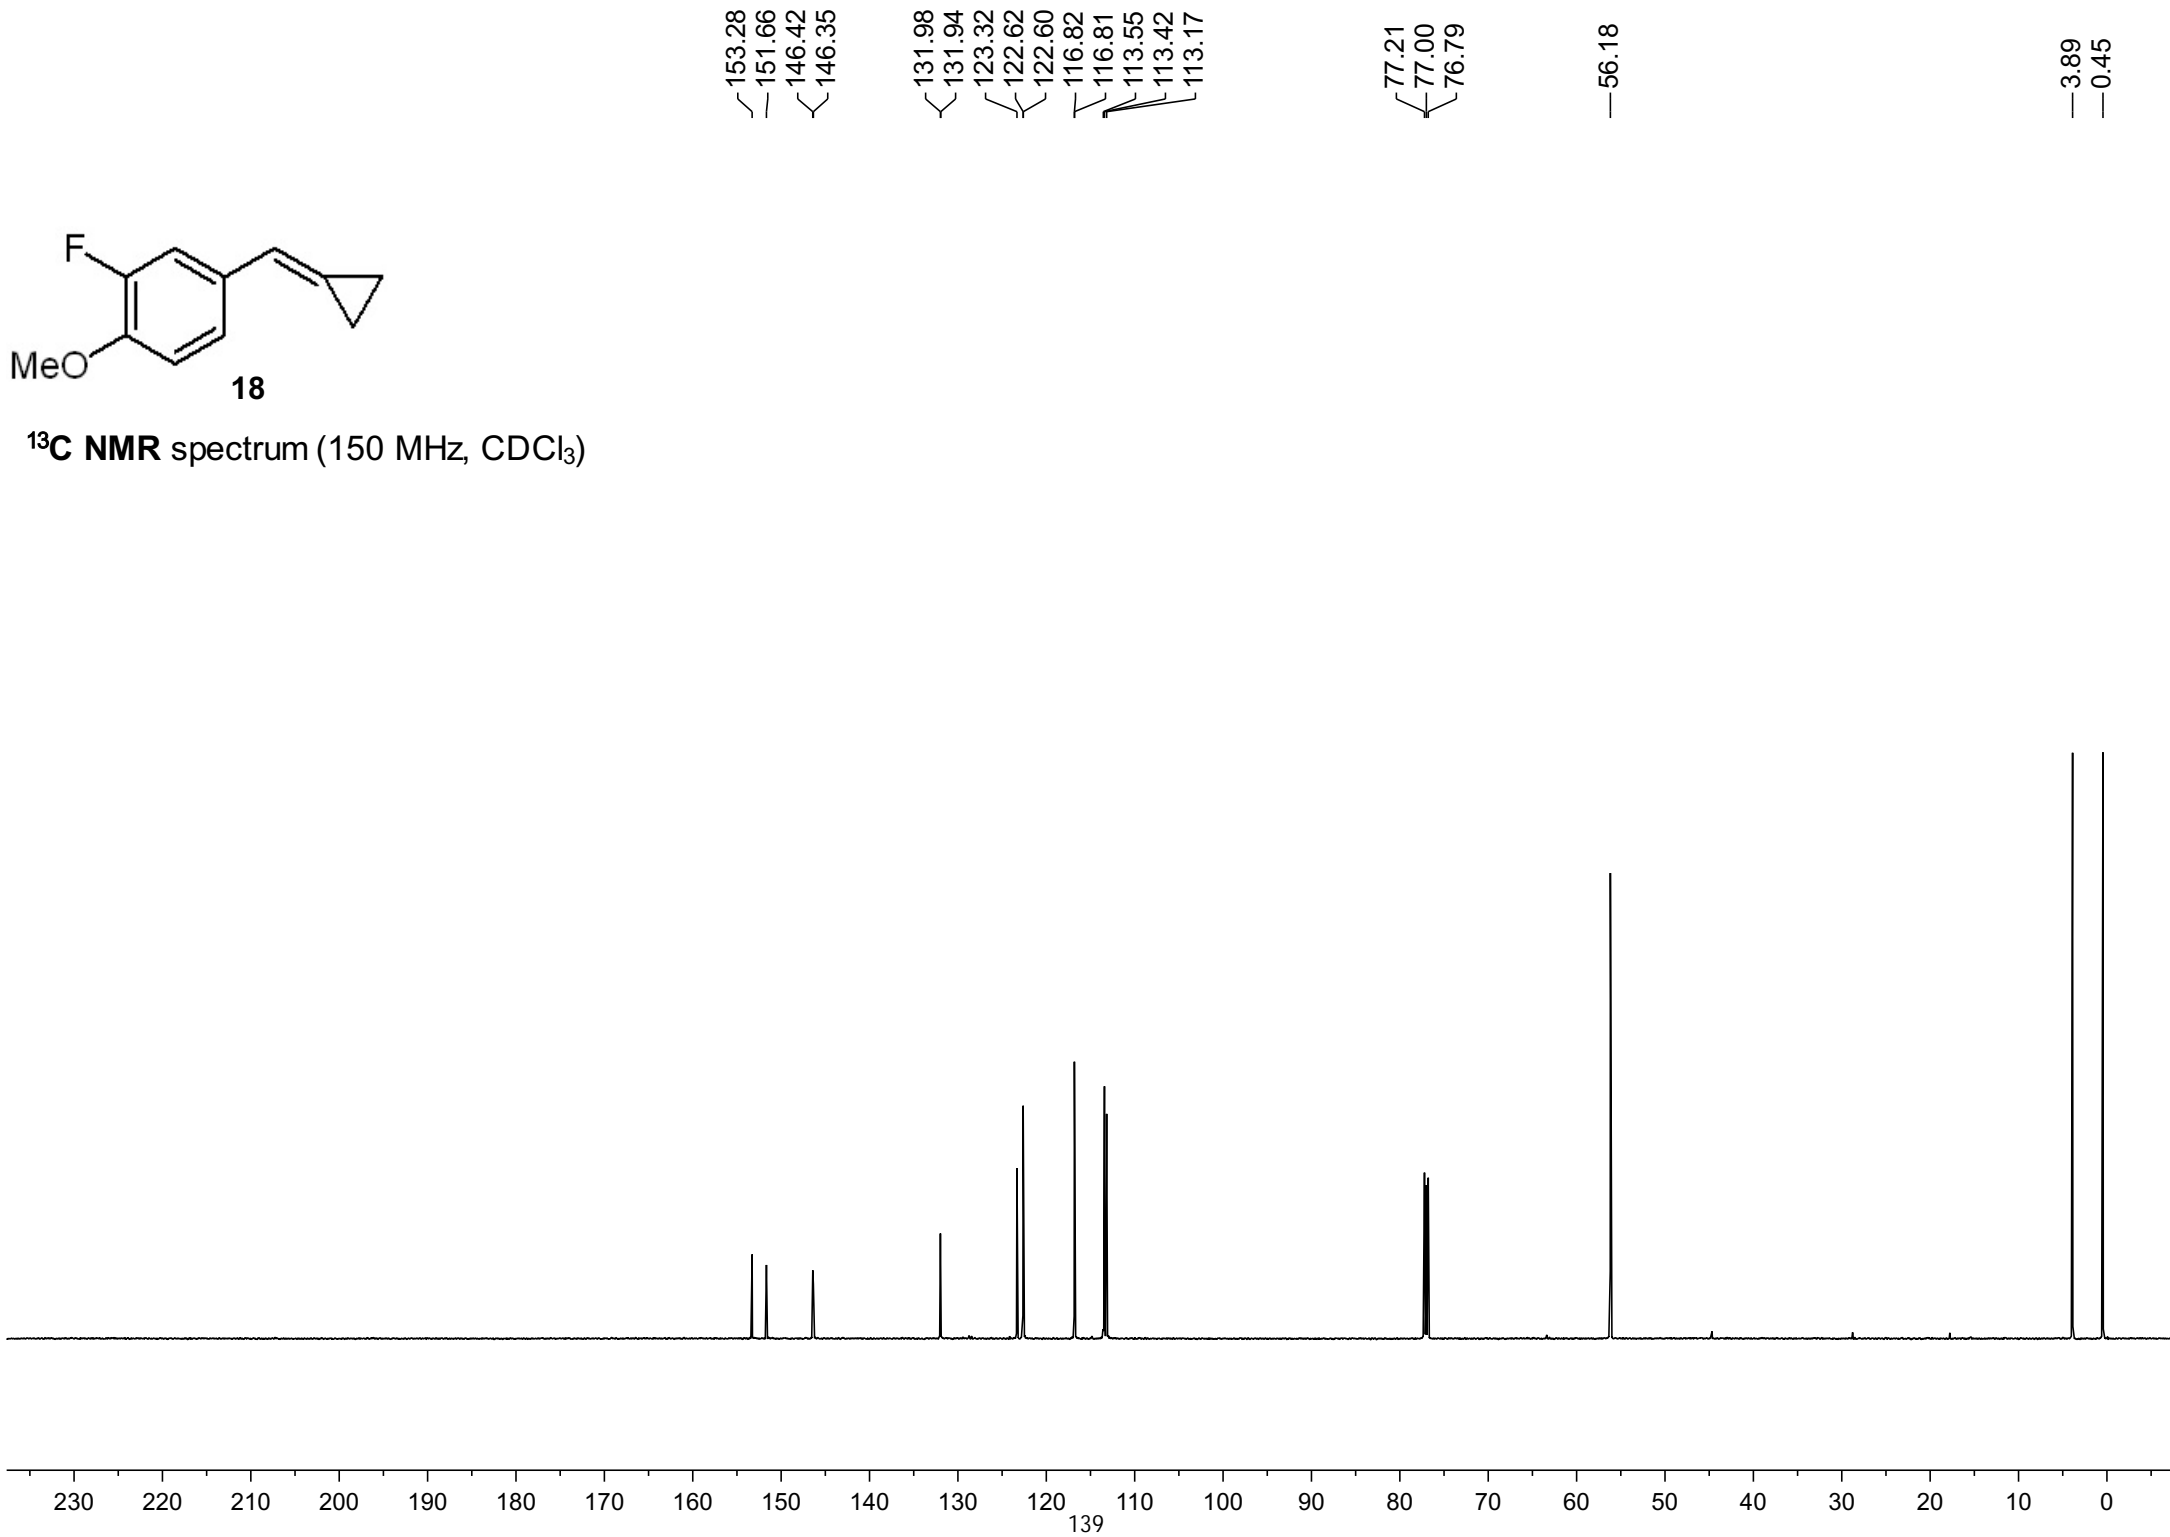



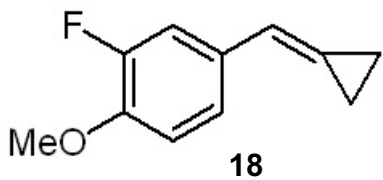

<sup>19</sup>F NMR spectrum (376 MHz, CDCl<sub>3</sub>)

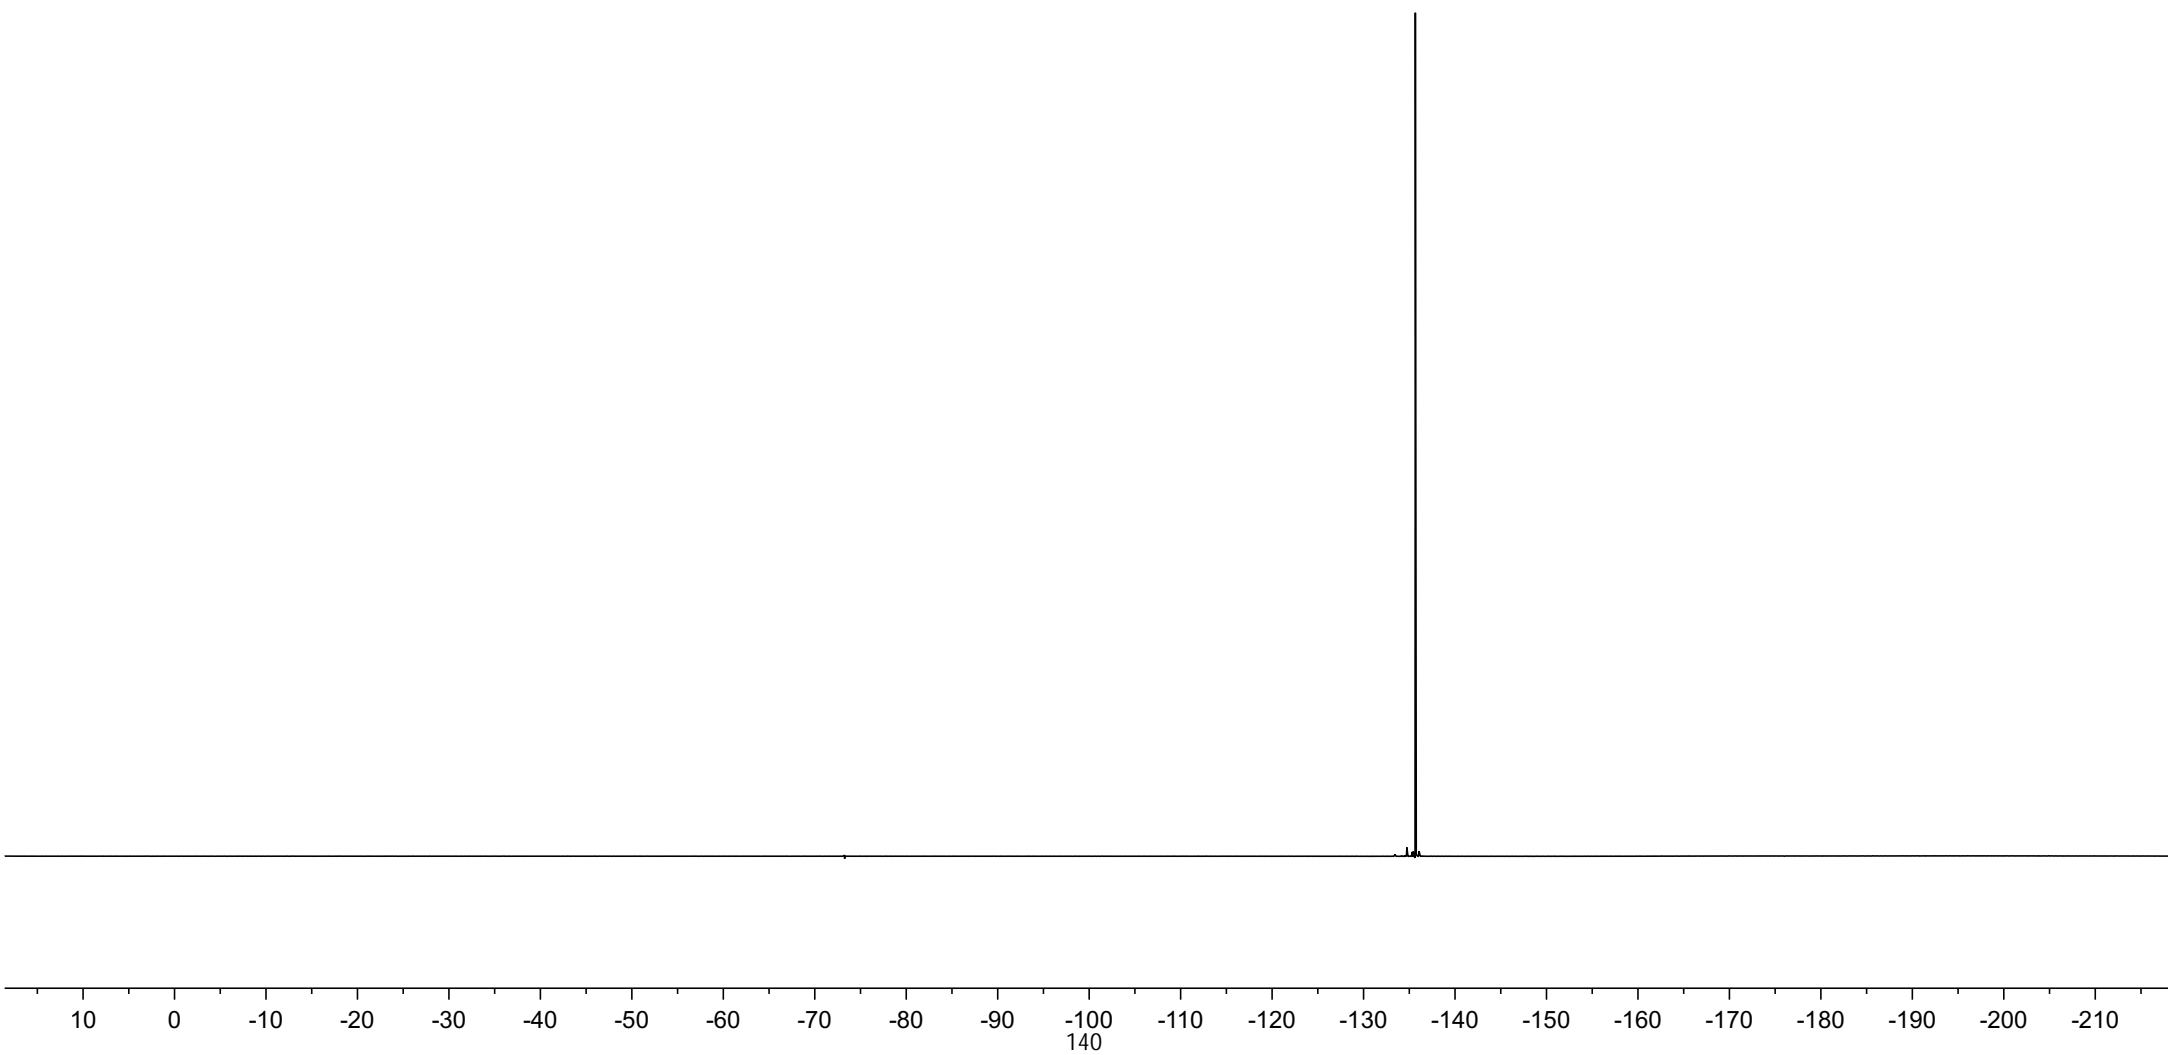

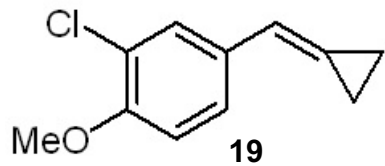

<sup>1</sup>H NMR spectrum (400 MHz, CDCl<sub>3</sub>)

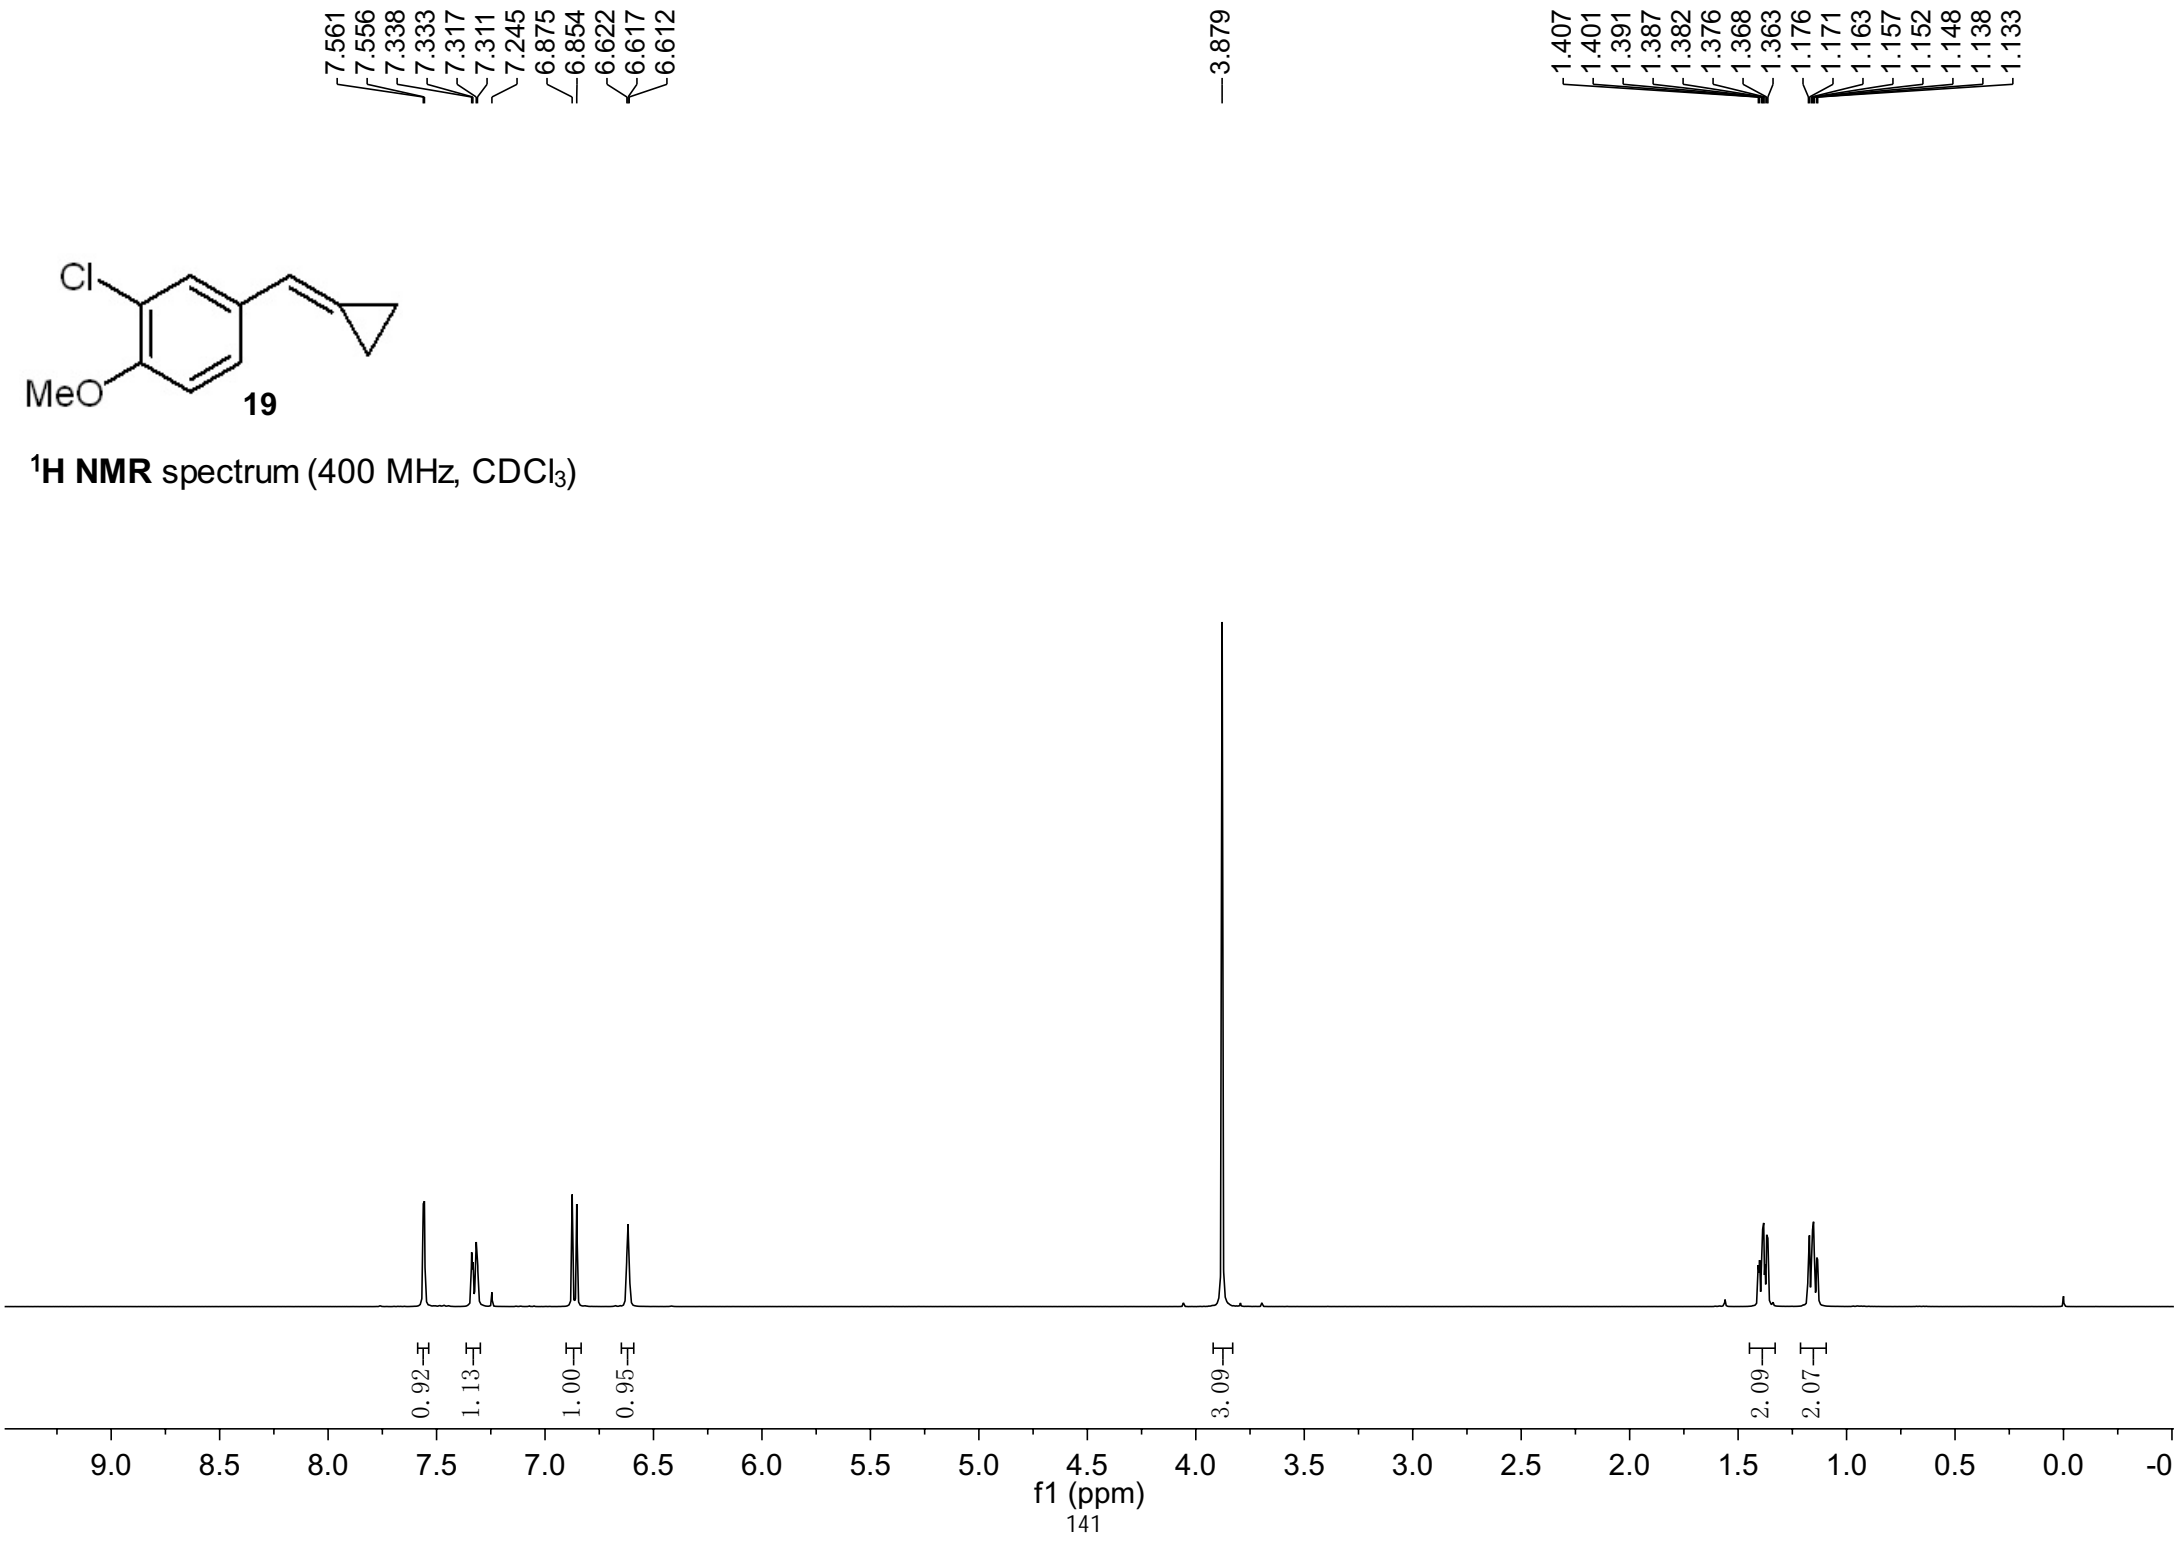



<sup>13</sup>C NMR spectrum (100 MHz, CDCl<sub>3</sub>)

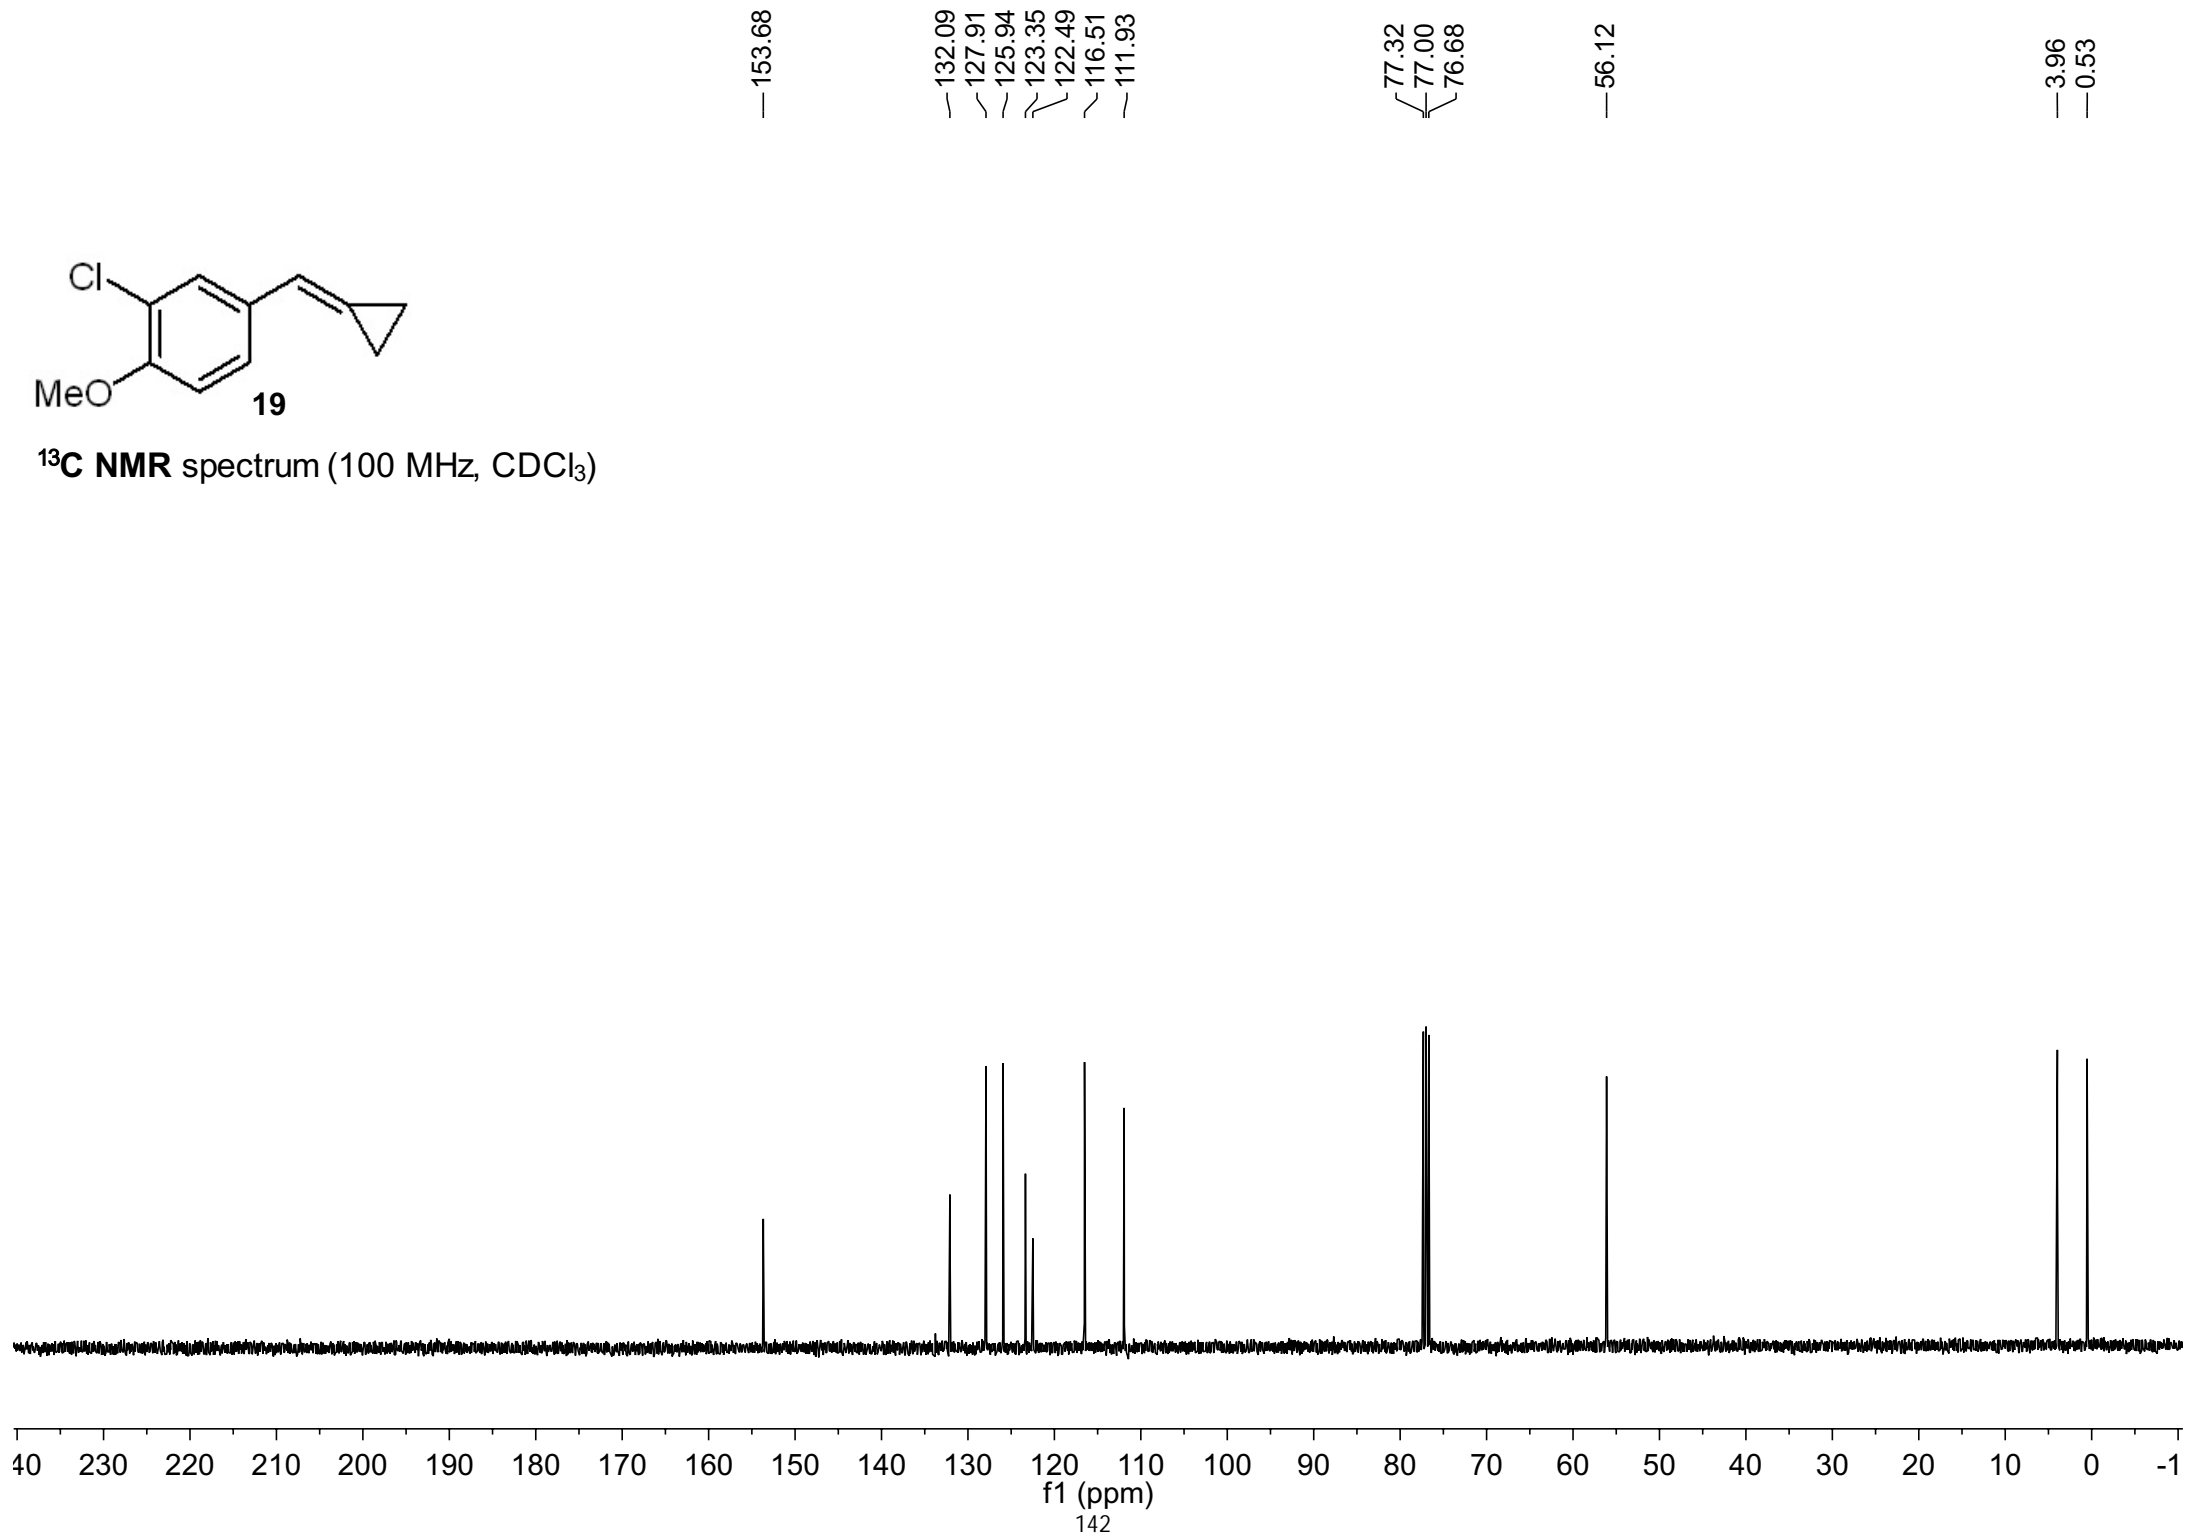

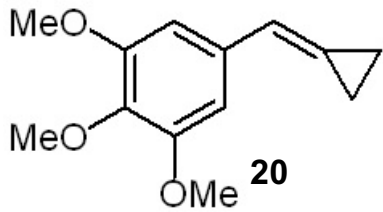

<sup>1</sup>H NMR spectrum (400 MHz, CDCl<sub>3</sub>)

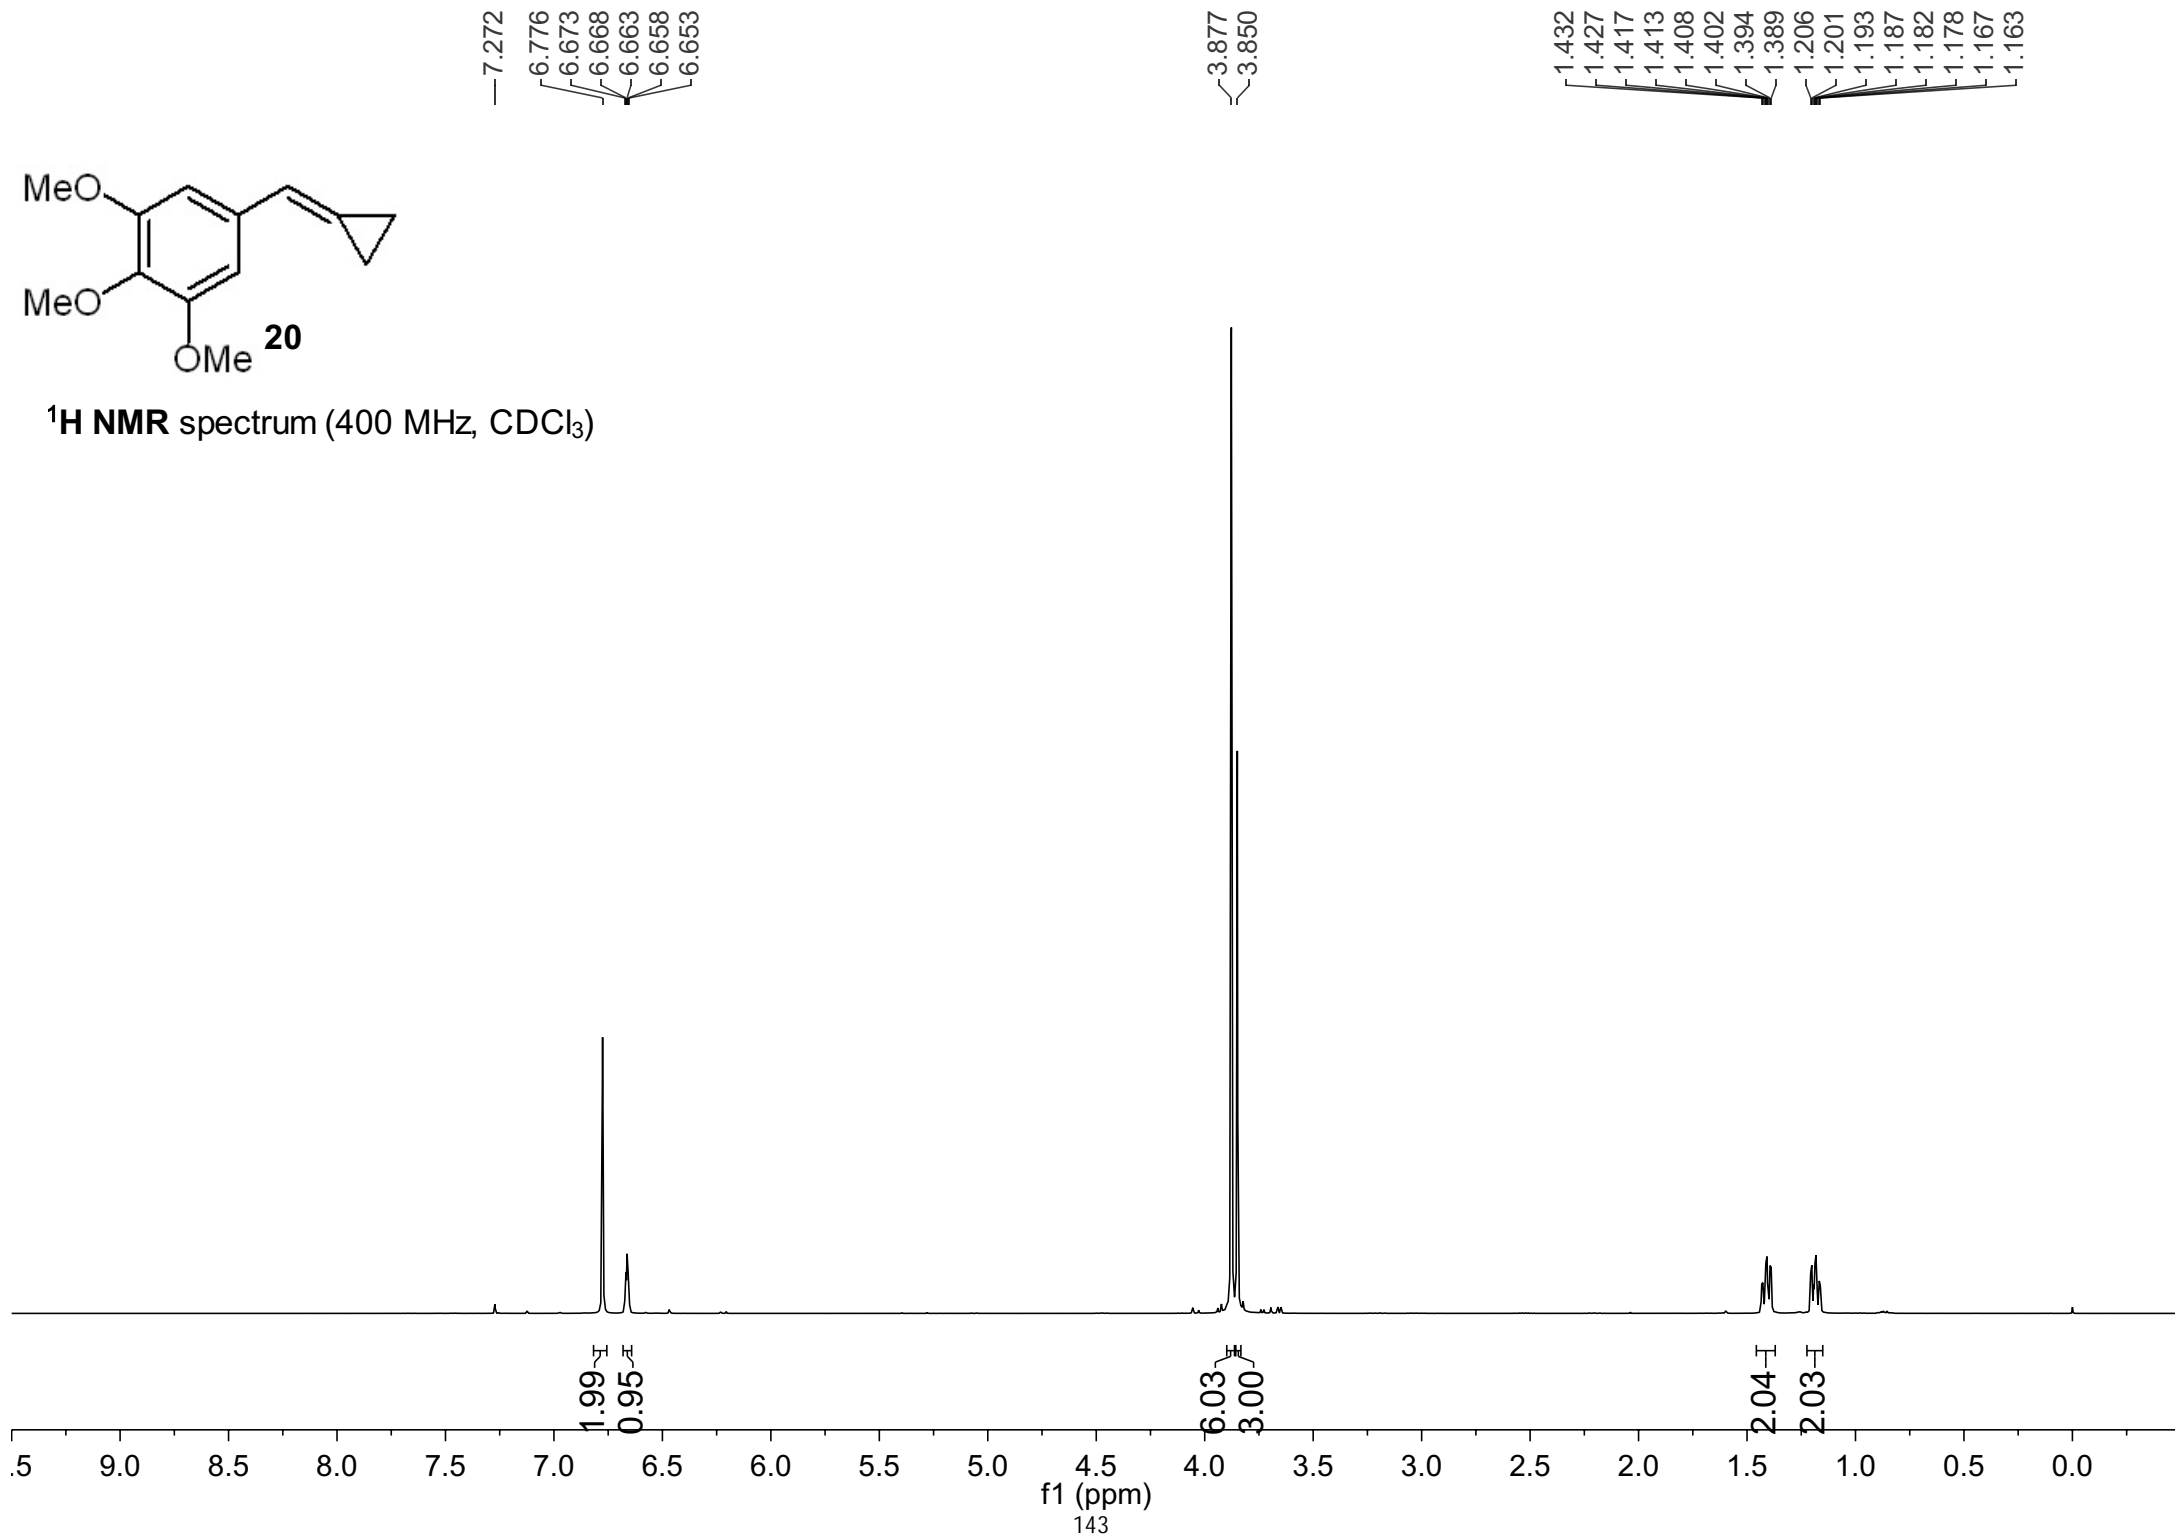

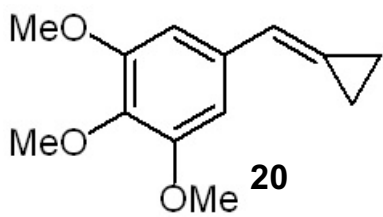

<sup>13</sup>C NMR spectrum (100 MHz, CDCl<sub>3</sub>)

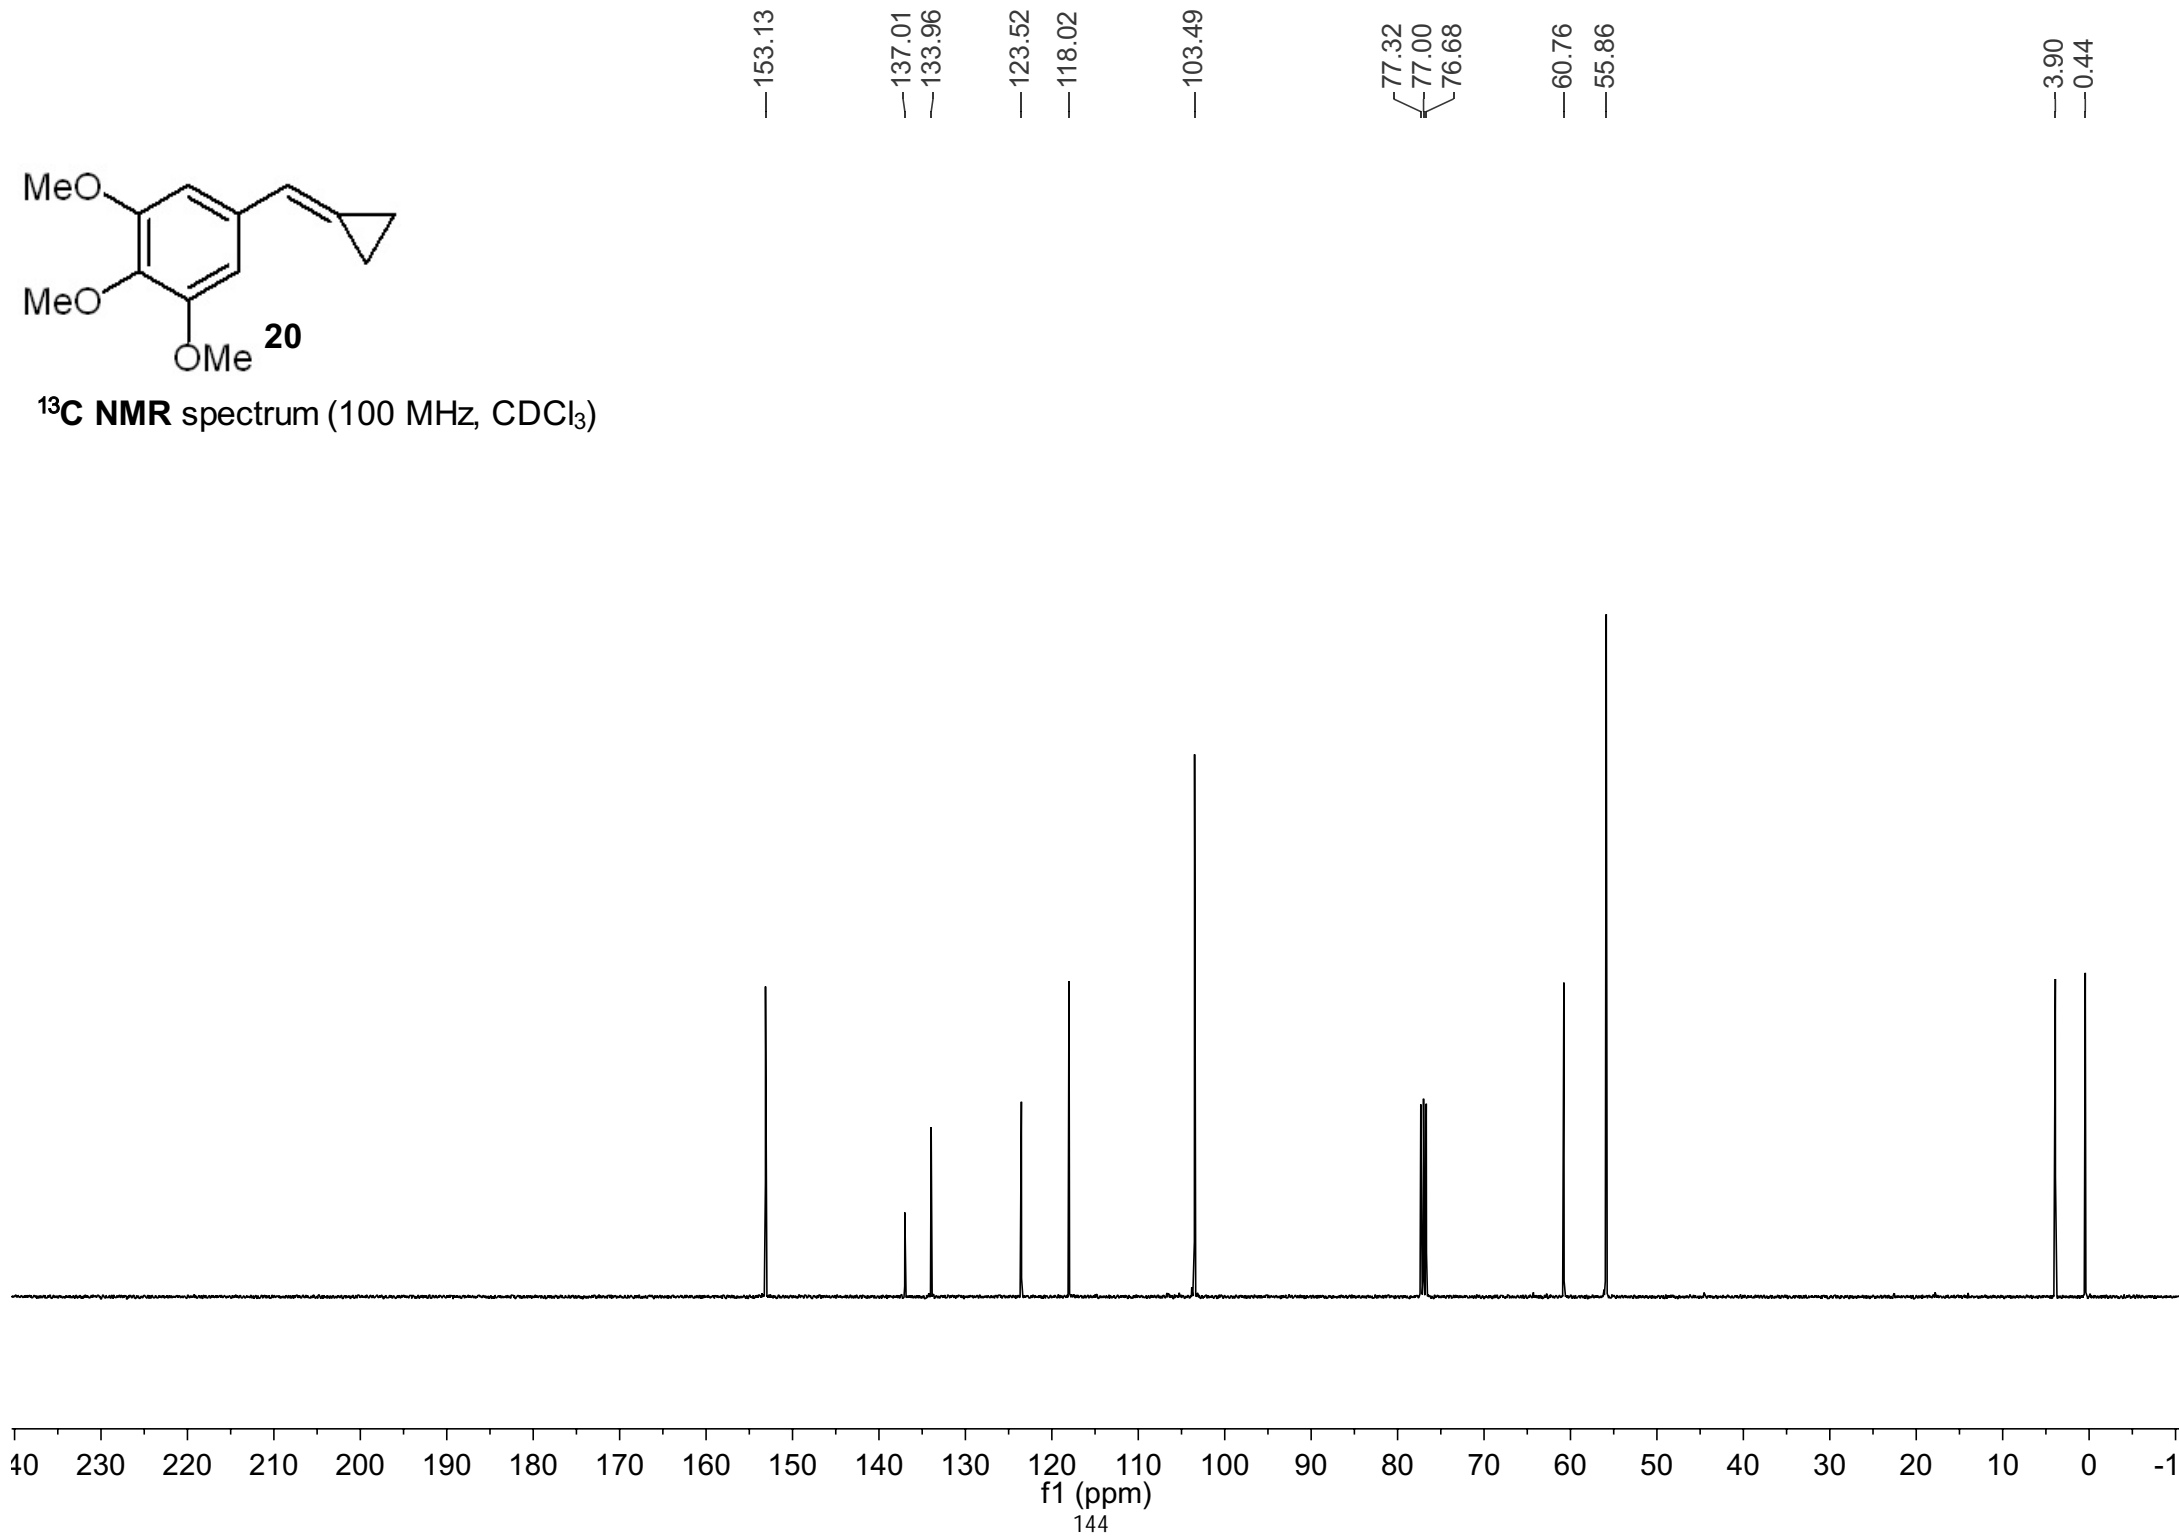

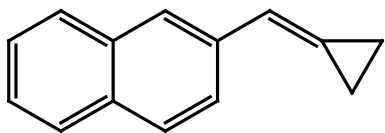

**21**

<sup>1</sup>H NMR spectrum (400 MHz, CDCl<sub>3</sub>)

7.831  
7.827  
7.806  
7.801  
7.788  
7.784  
7.775  
7.754  
7.453  
7.449  
7.436  
7.432  
7.417  
7.412  
7.398  
7.394  
7.380  
7.377  
7.208  
6.910  
6.905  
6.901

1.518  
1.513  
1.499  
1.494  
1.488  
1.480  
1.474  
1.250  
1.229  
1.225  
1.216  
1.210  
1.206  
1.191  
1.187

—0.000

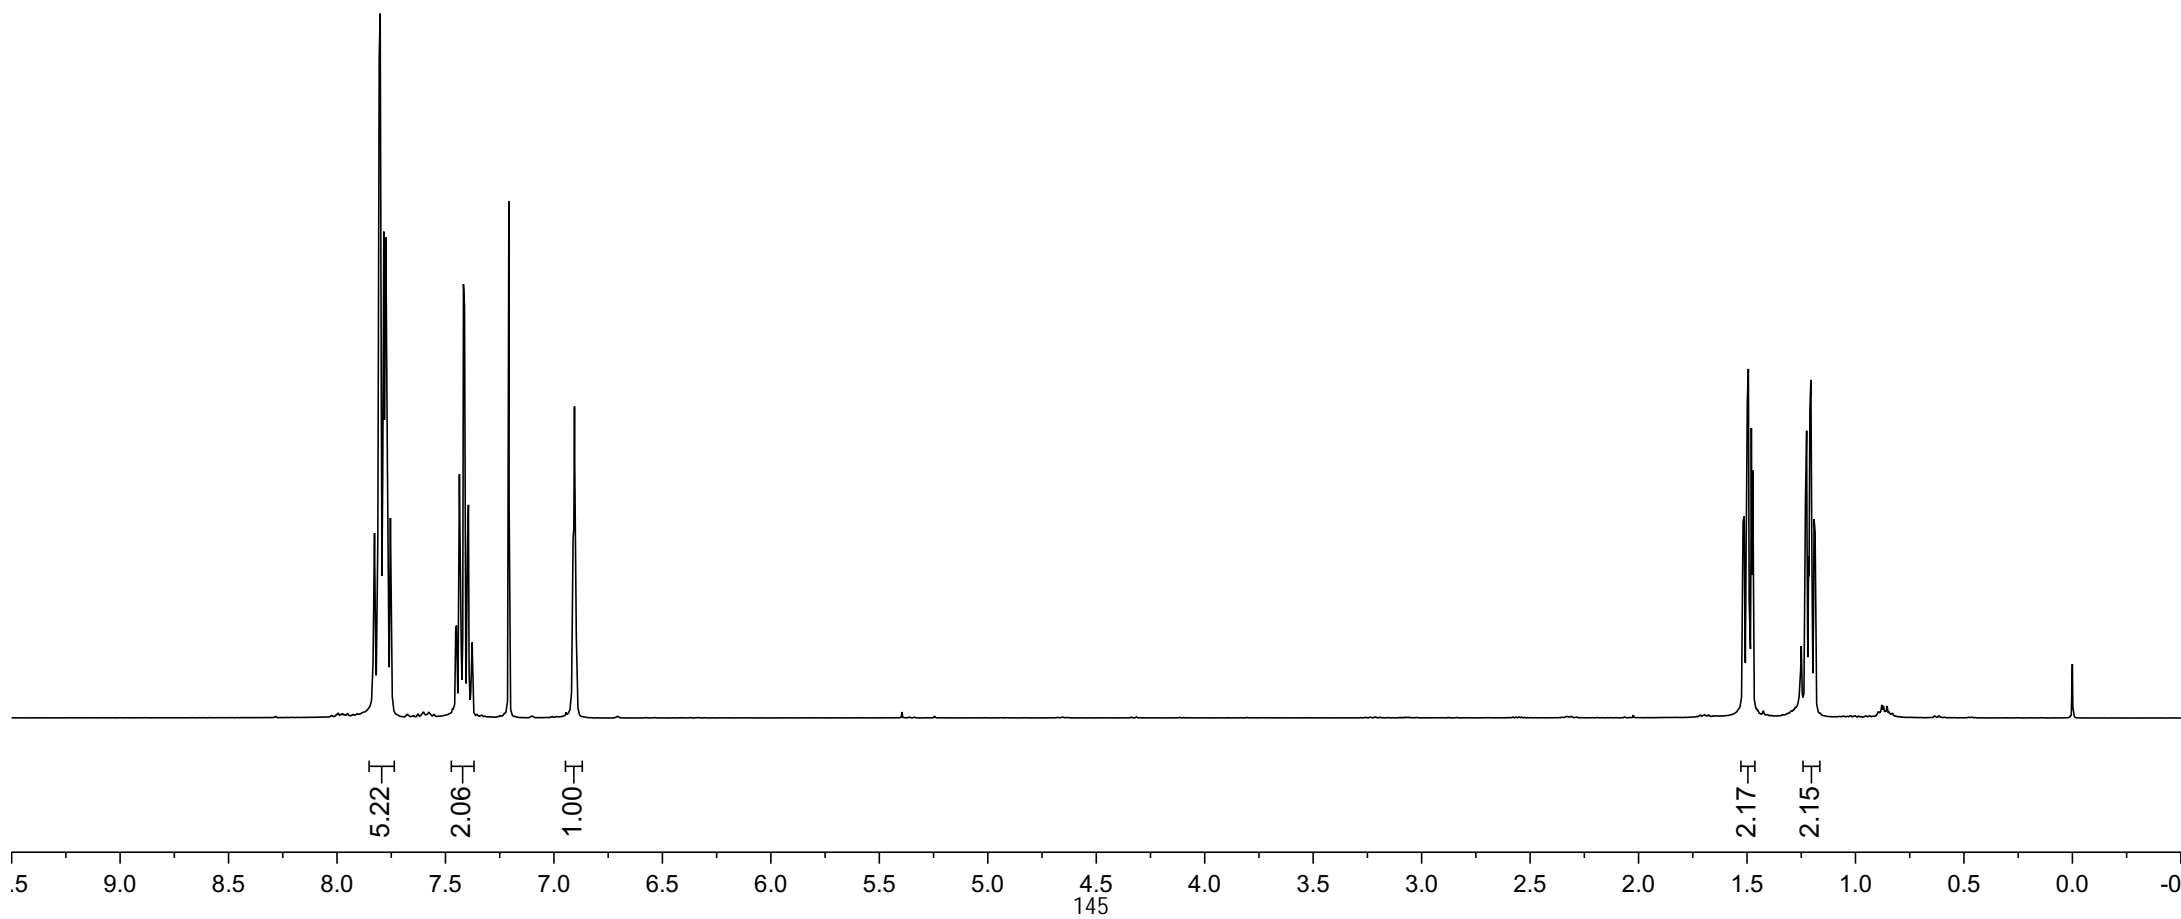

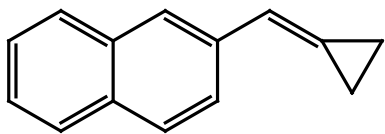

21

<sup>13</sup>C NMR spectrum (100 MHz, CDCl<sub>3</sub>)

135.86  
133.71  
132.55  
127.94  
127.85  
127.62  
126.03  
125.73  
125.42  
124.92  
124.46  
118.49

77.32  
77.00  
76.68

4.43  
0.66

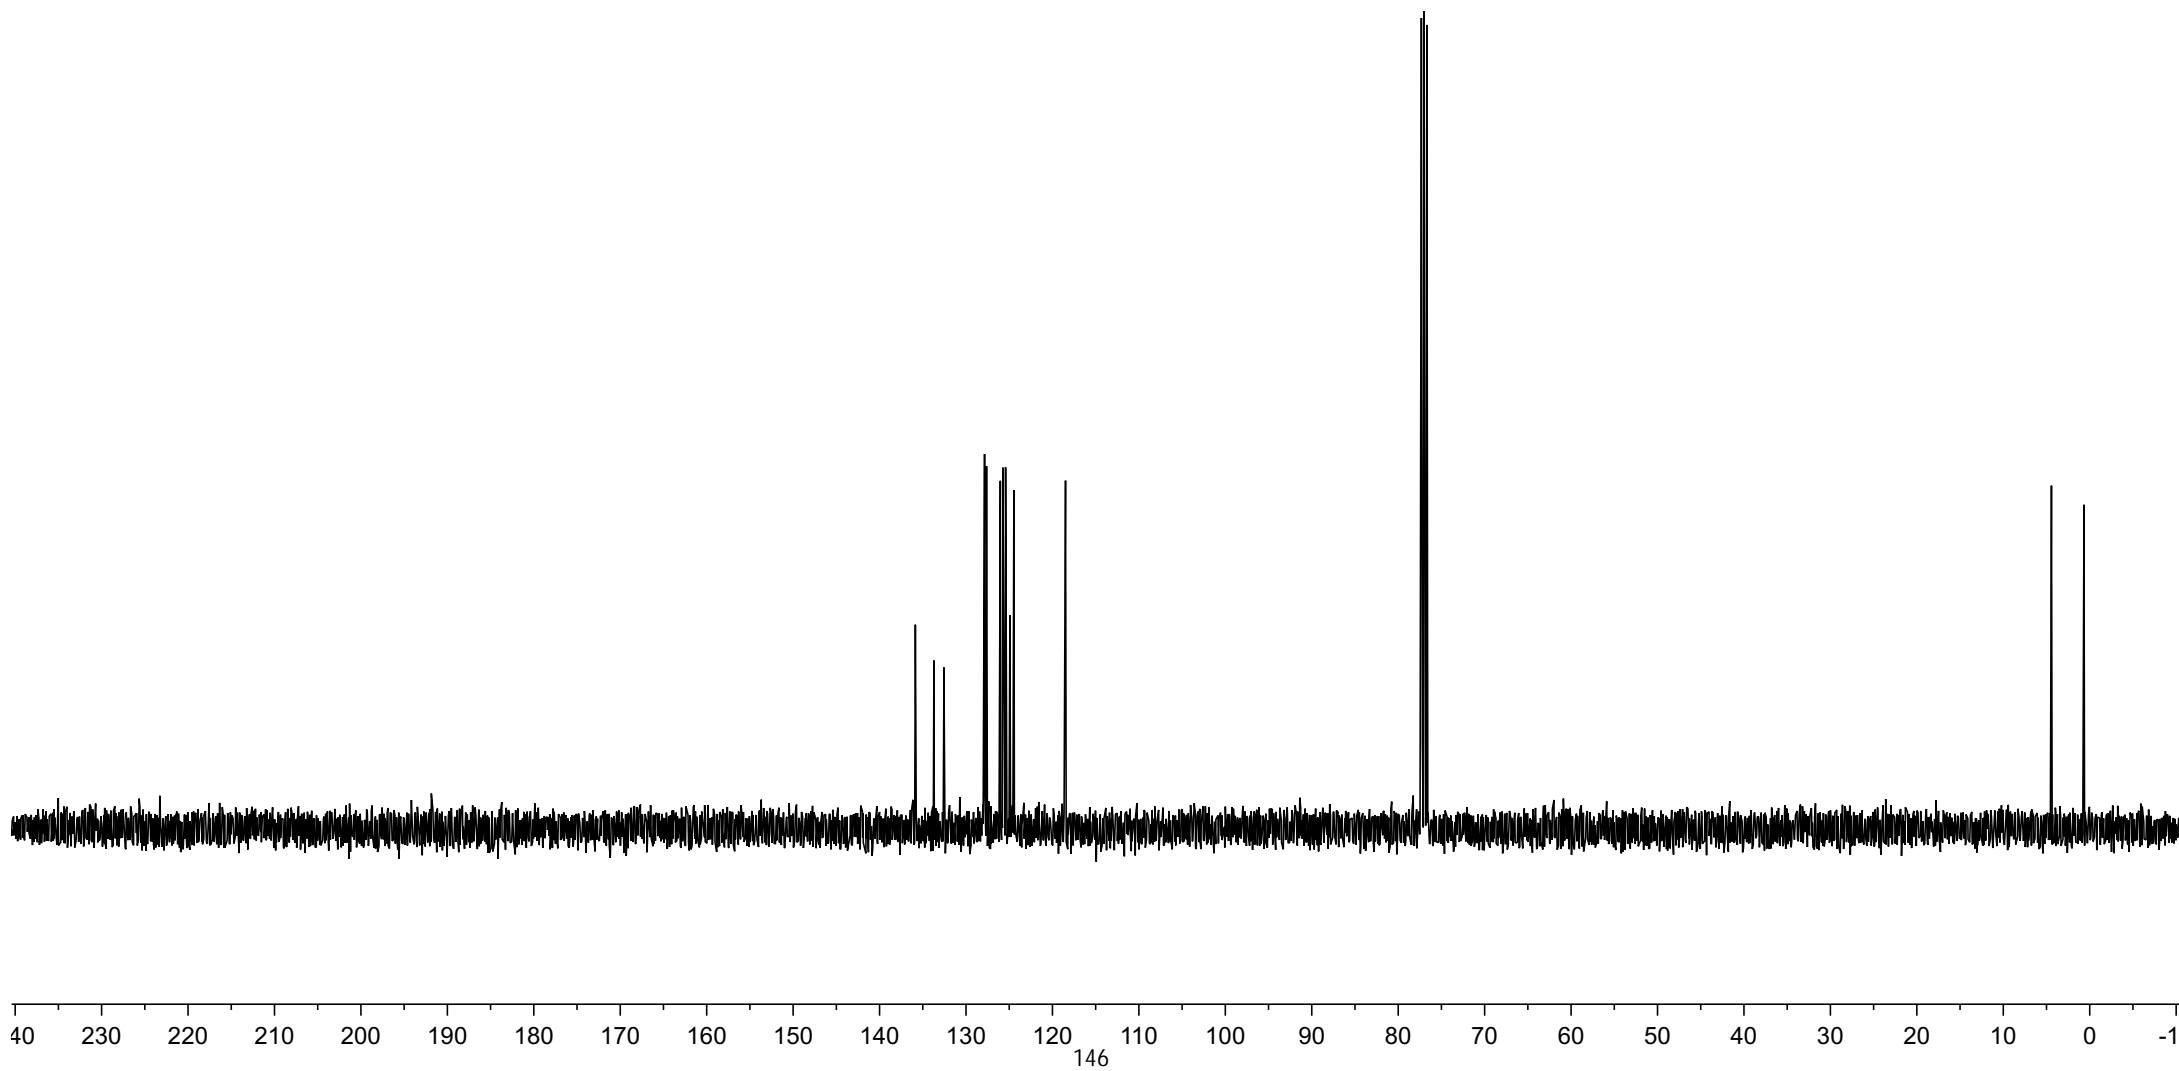

8.205  
8.184  
7.850  
7.832  
7.816  
7.798  
7.794  
7.715  
7.695  
7.498  
7.486  
7.473  
7.469  
7.451  
7.431  
7.413  
—7.116

1.427  
1.424  
1.406  
1.403  
1.397  
1.389  
1.384  
1.260  
1.256  
1.247  
1.237  
1.219

—0.000

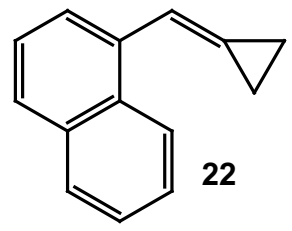

<sup>1</sup>H NMR spectrum (400 MHz, CDCl<sub>3</sub>)

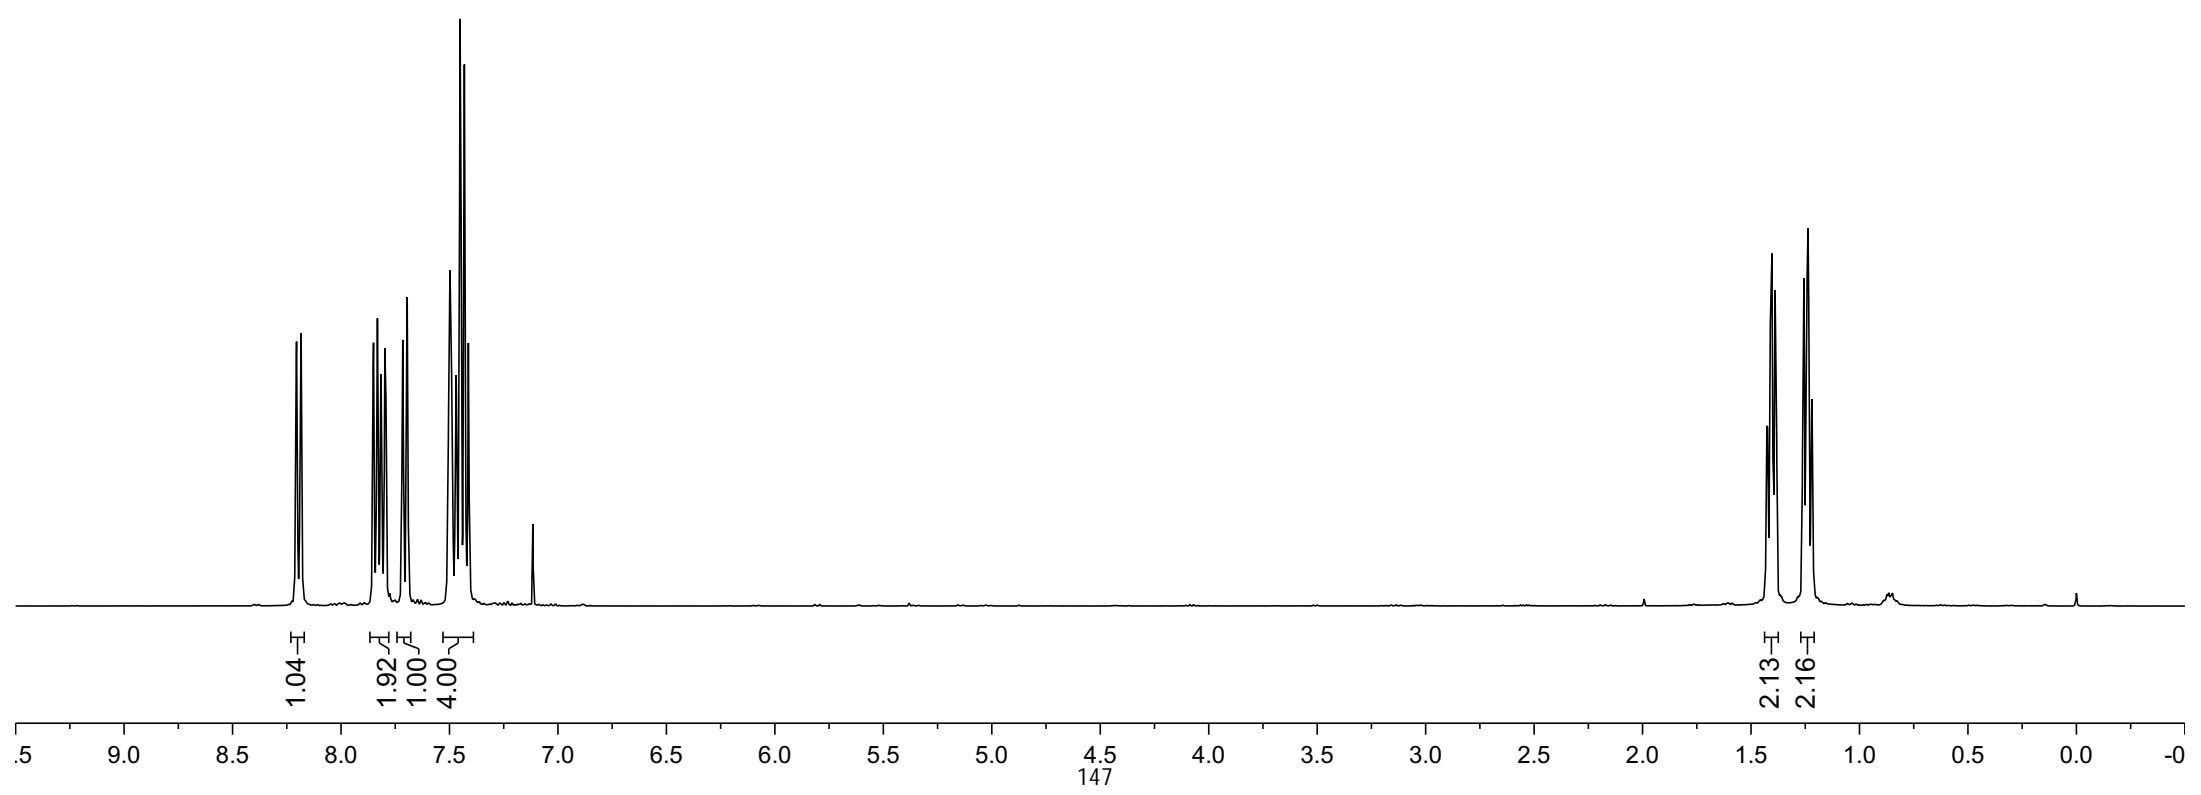



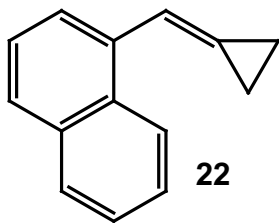

<sup>13</sup>C NMR spectrum (100 MHz, CDCl<sub>3</sub>)

134.56  
133.78  
131.01  
128.53  
127.06  
126.67  
125.75  
125.54  
125.47  
123.77  
123.52  
114.63

77.32  
77.00  
76.68

4.06  
1.47

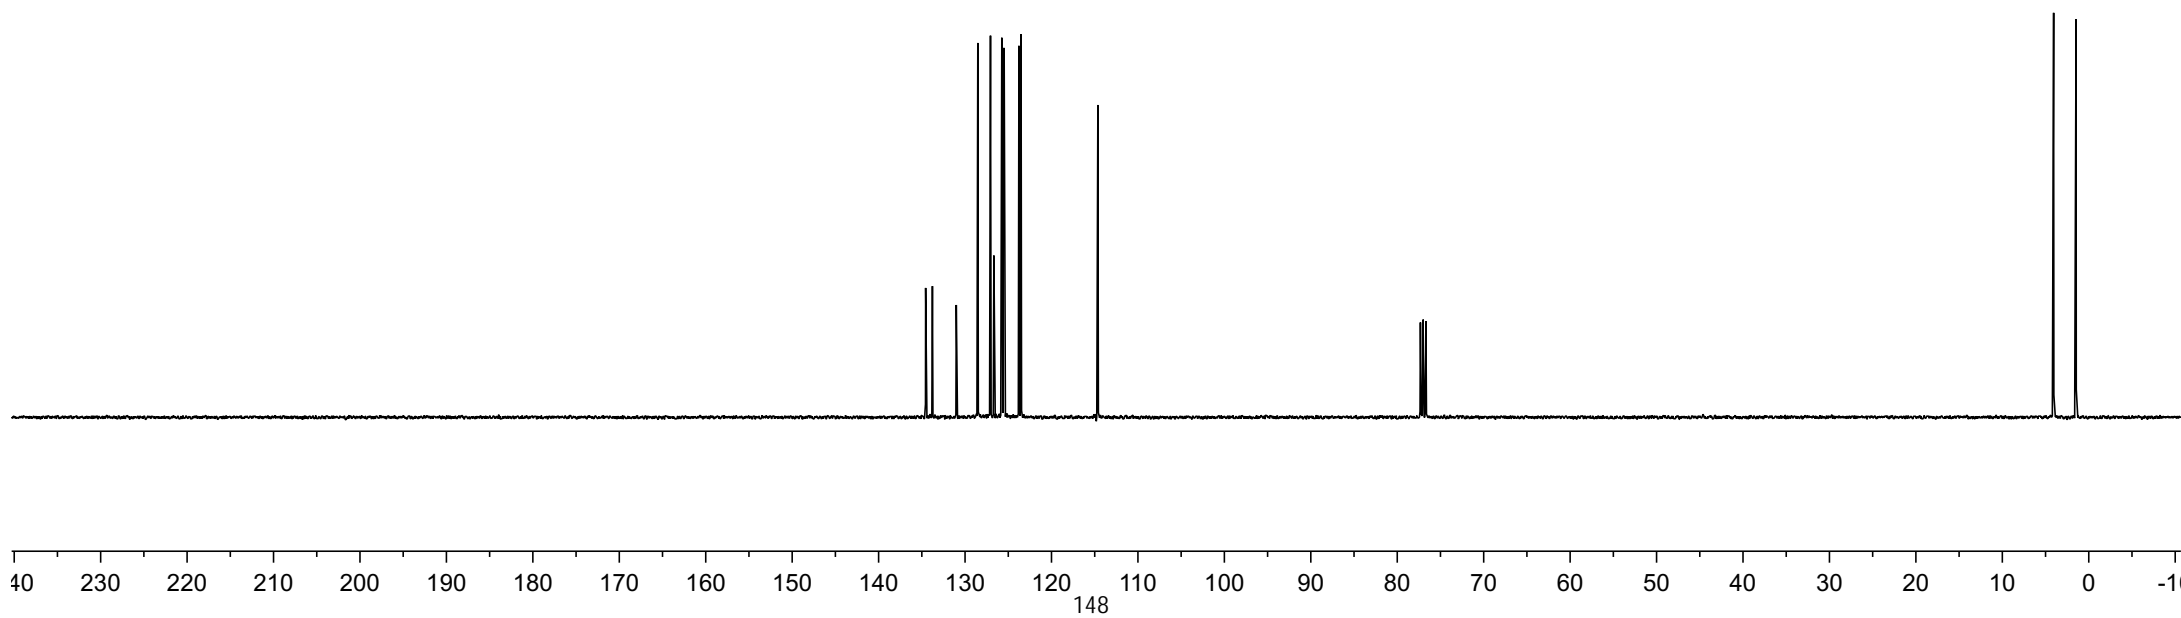

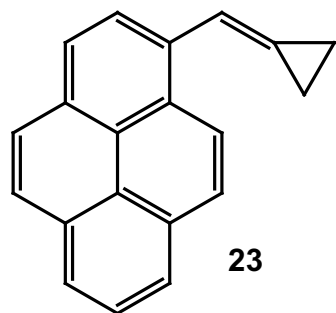

<sup>1</sup>H NMR spectrum (400 MHz, CDCl<sub>3</sub>)

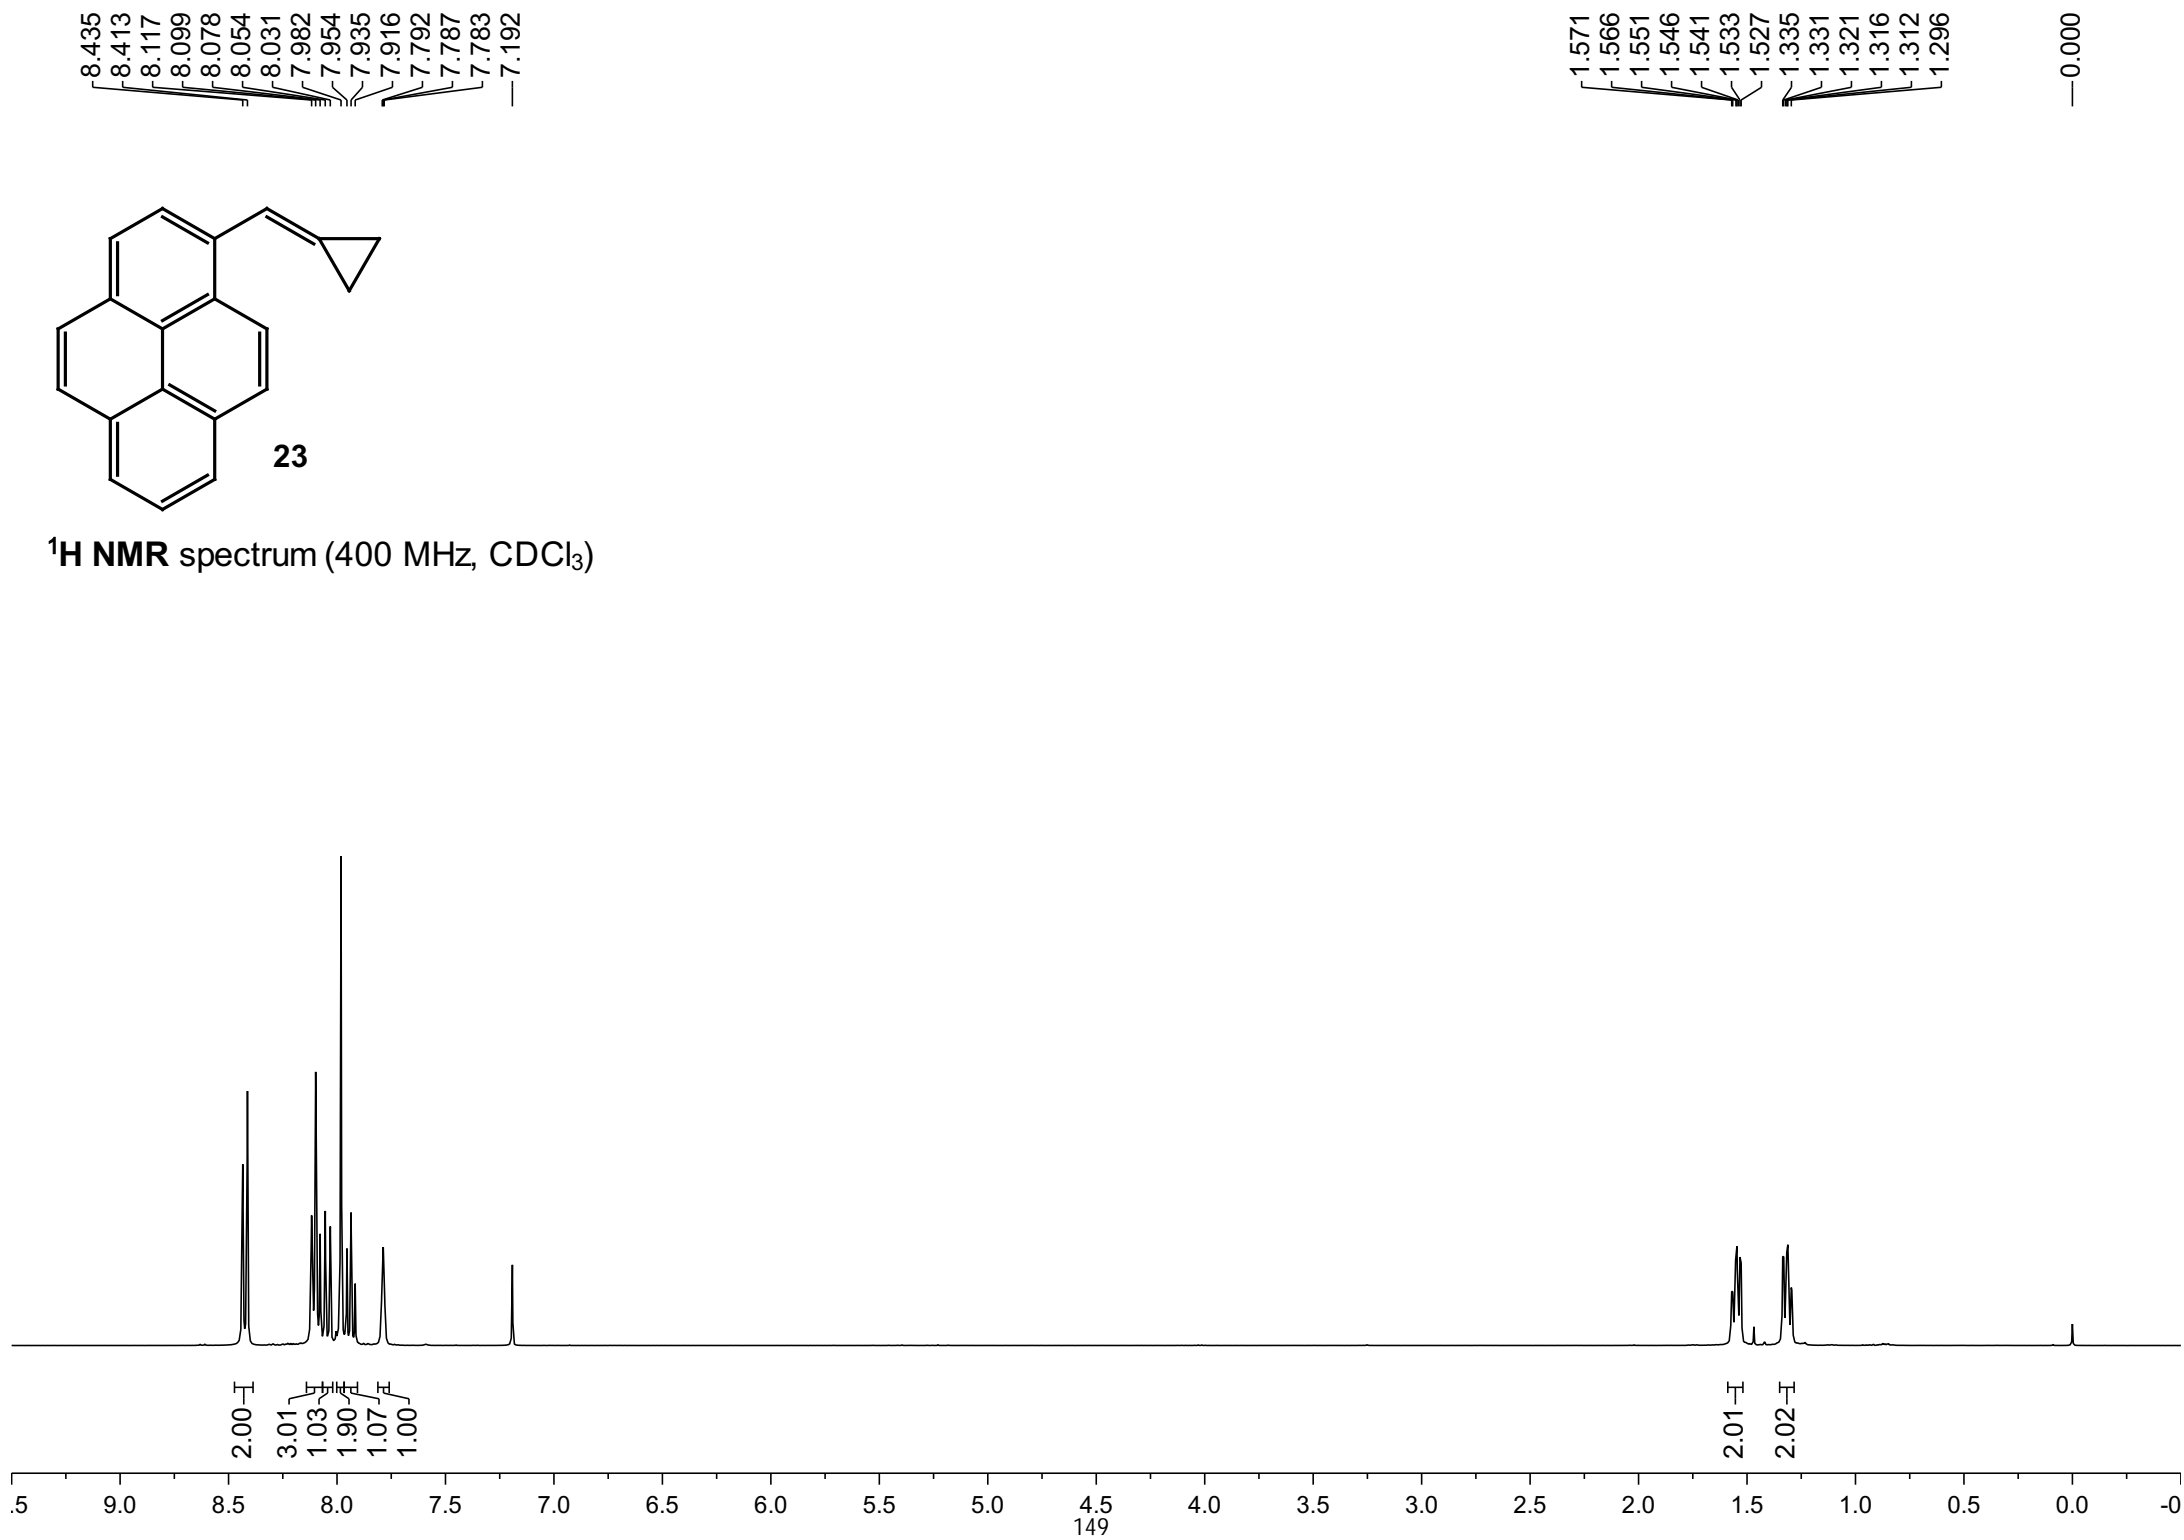



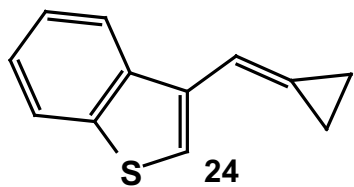

<sup>1</sup>H NMR spectrum (600 MHz, CDCl<sub>3</sub>)

7.963  
7.949  
7.852  
7.851  
7.849  
7.839  
7.837  
7.836  
7.531  
7.402  
7.400  
7.390  
7.388  
7.387  
7.377  
7.375  
7.349  
7.347  
7.335  
7.324  
7.322  
7.205  
7.072  
7.069  
7.065  
7.062  
7.059

1.409  
1.408  
1.406  
1.405  
1.398  
1.395  
1.395  
1.392  
1.388  
1.384  
1.380  
1.293  
1.290  
1.284  
1.281  
1.280  
1.278  
1.275  
1.266  
-0.000

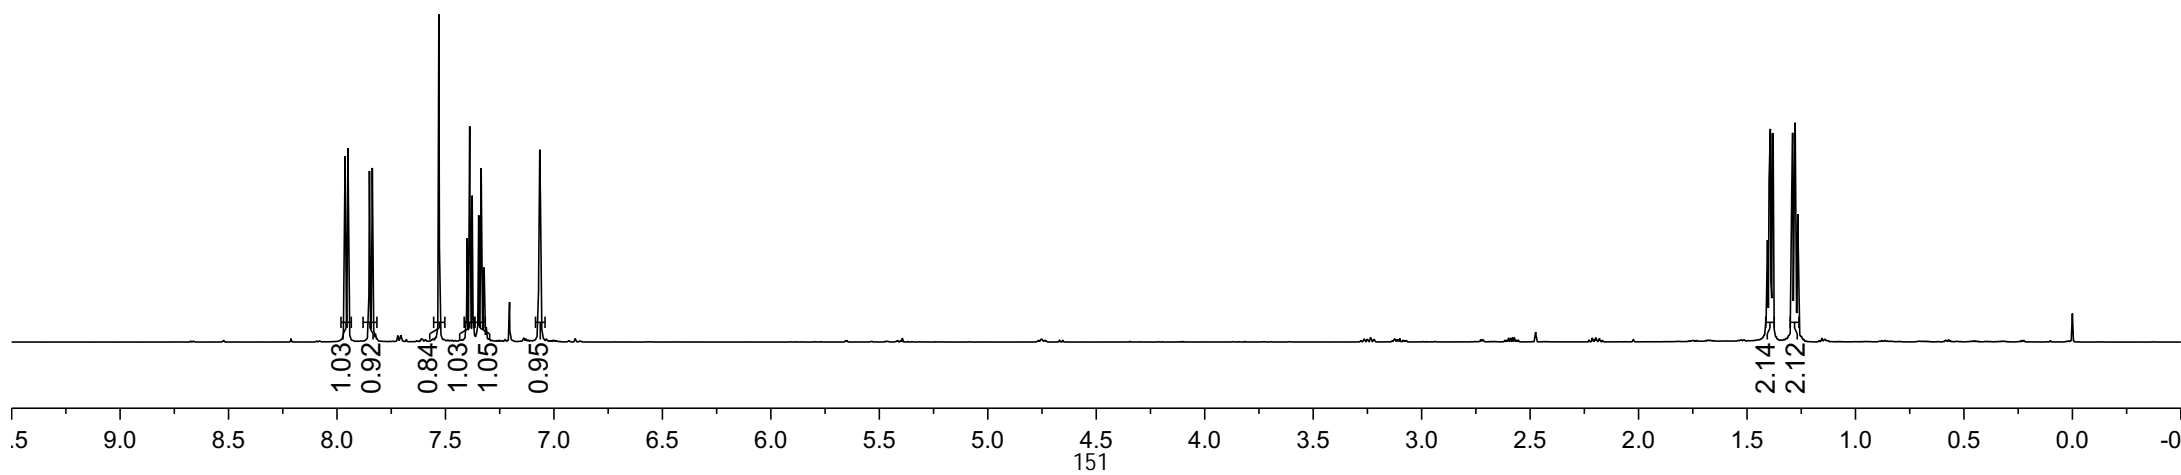

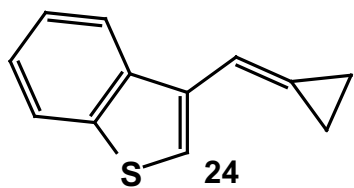

<sup>13</sup>C NMR spectrum (150 MHz, CDCl<sub>3</sub>)

140.18  
137.93  
134.07  
125.33  
124.26  
124.01  
122.76  
121.76  
120.84  
110.54

77.21  
77.00  
76.79

4.23  
2.06

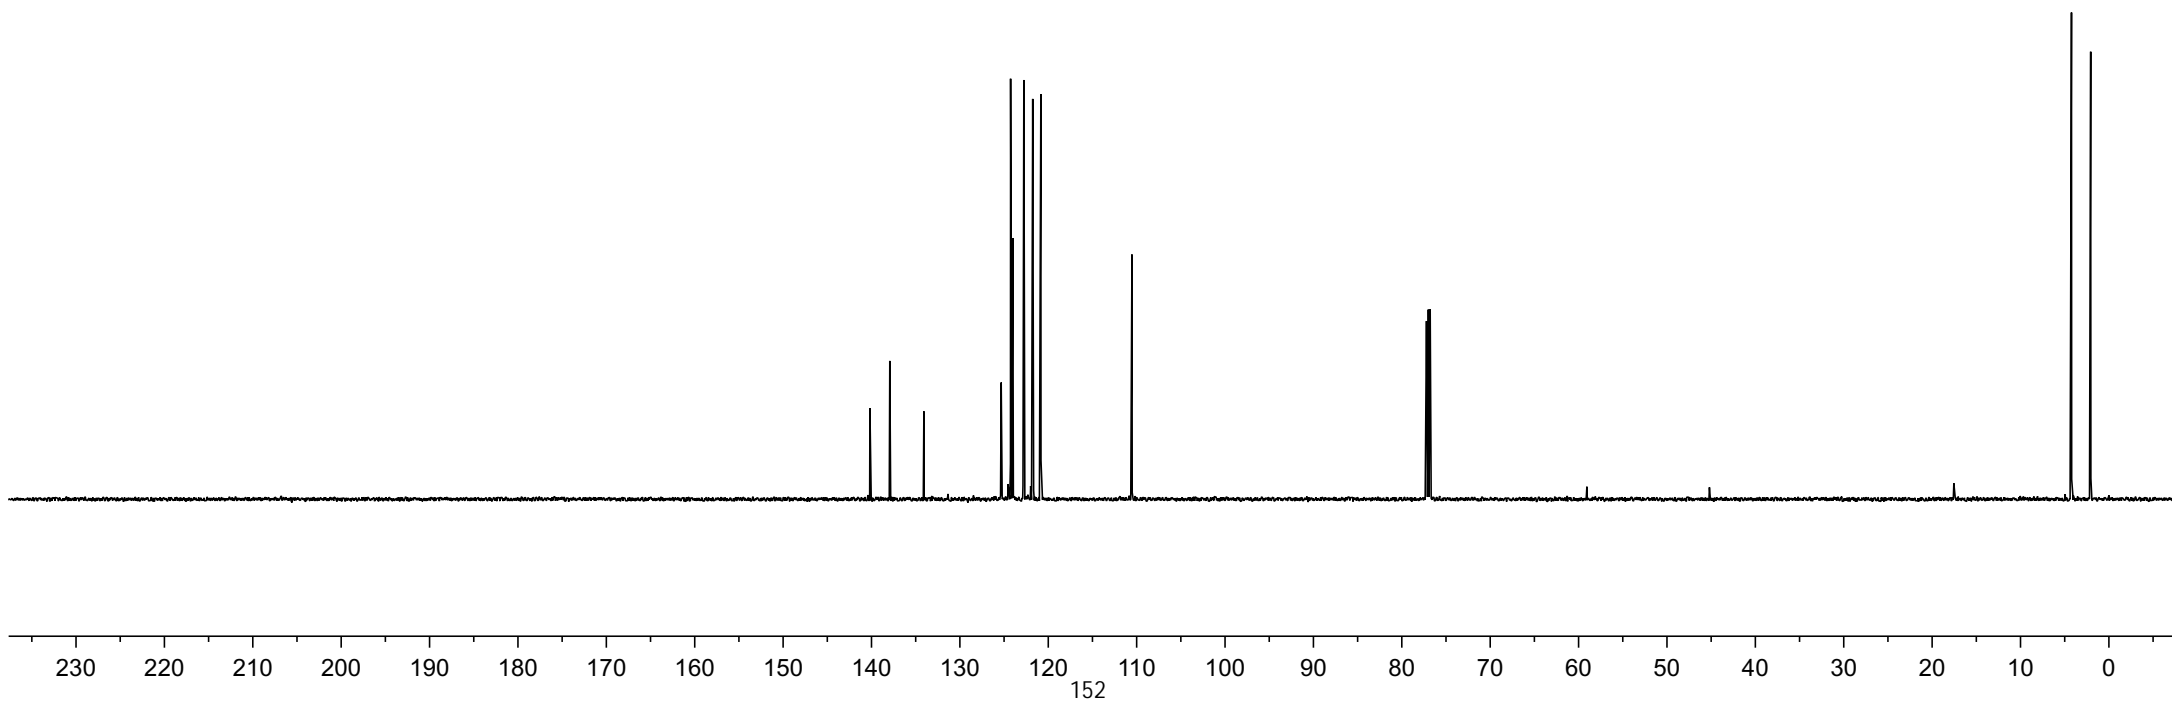

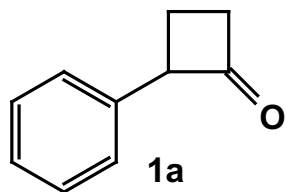

<sup>1</sup>H NMR spectrum (400 MHz, CDCl<sub>3</sub>)

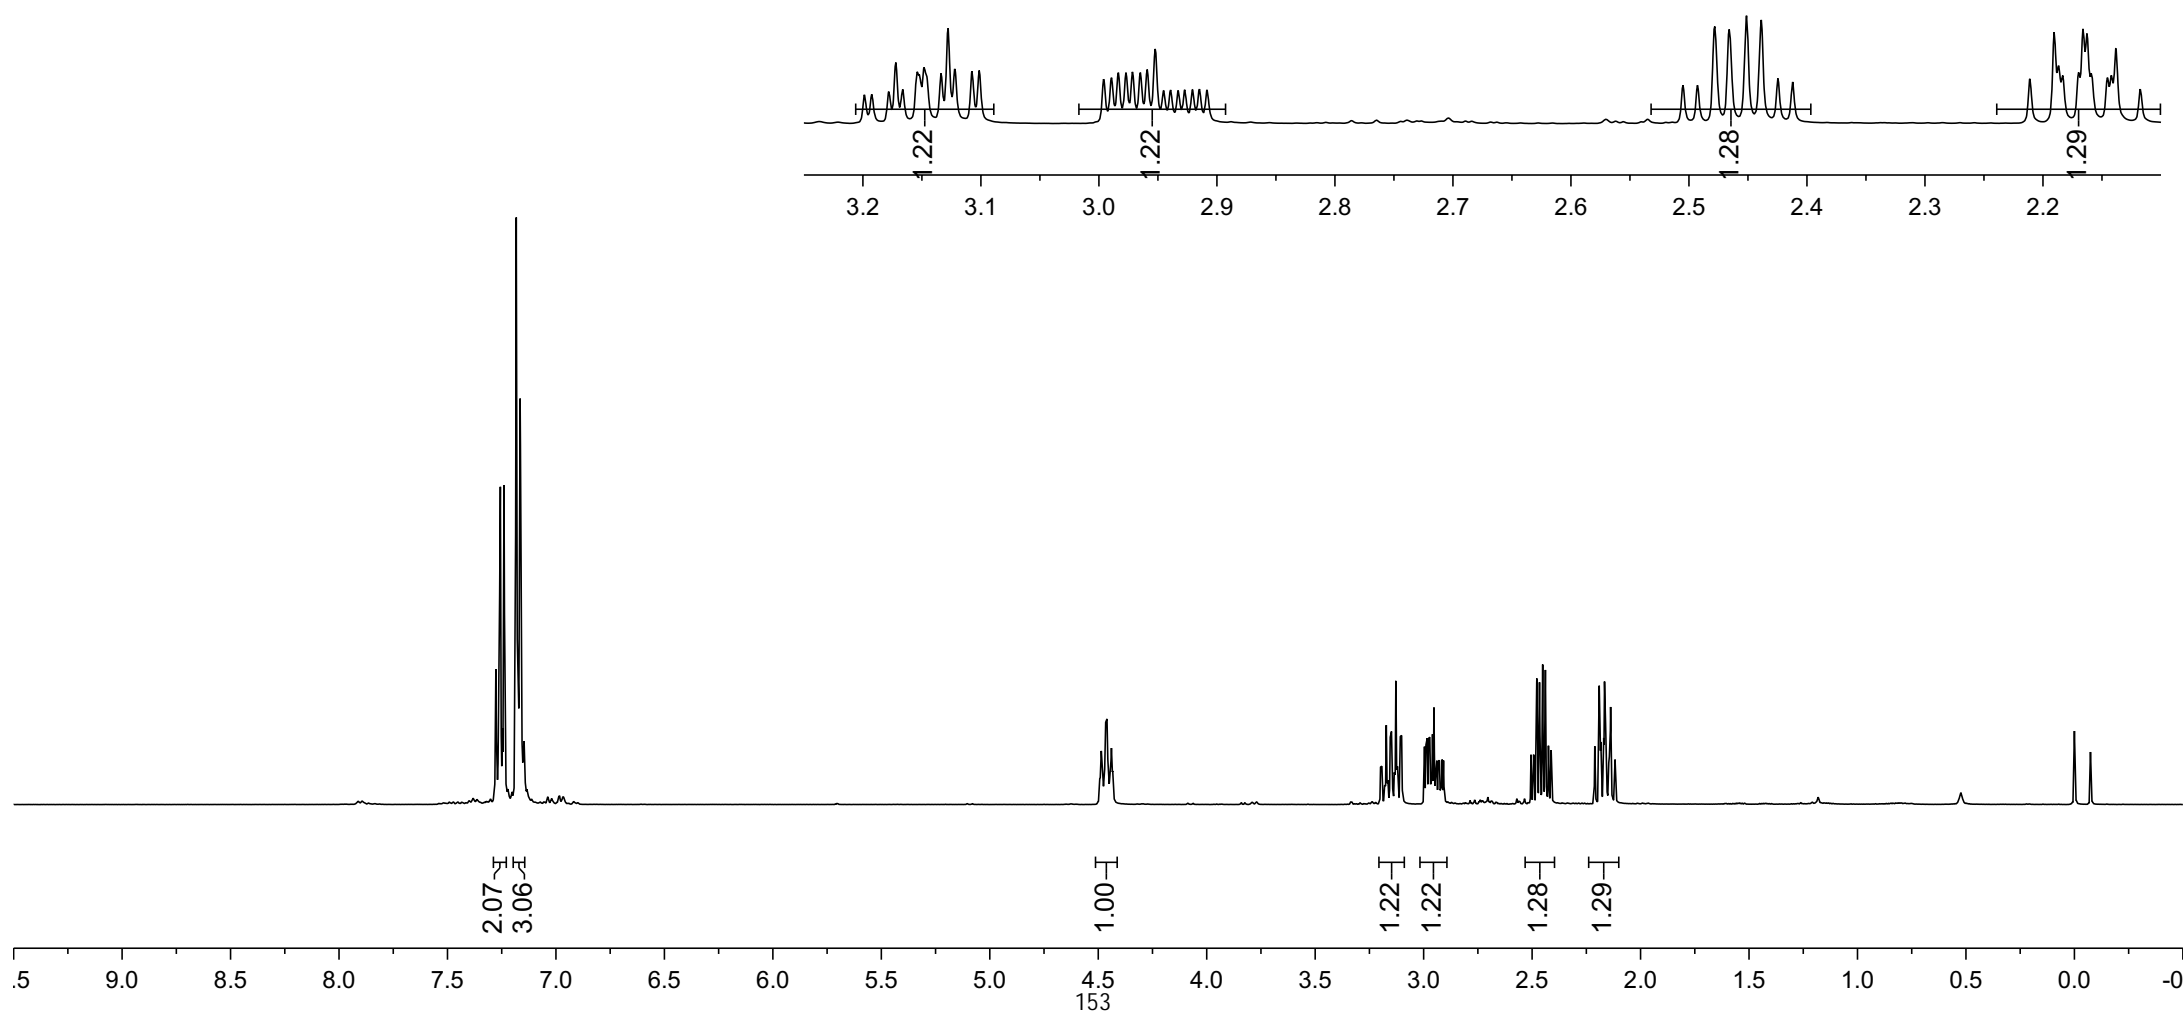

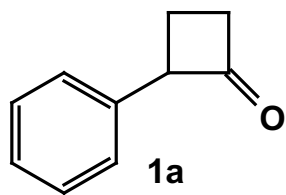

<sup>13</sup>C NMR spectrum (100 MHz, CDCl<sub>3</sub>)

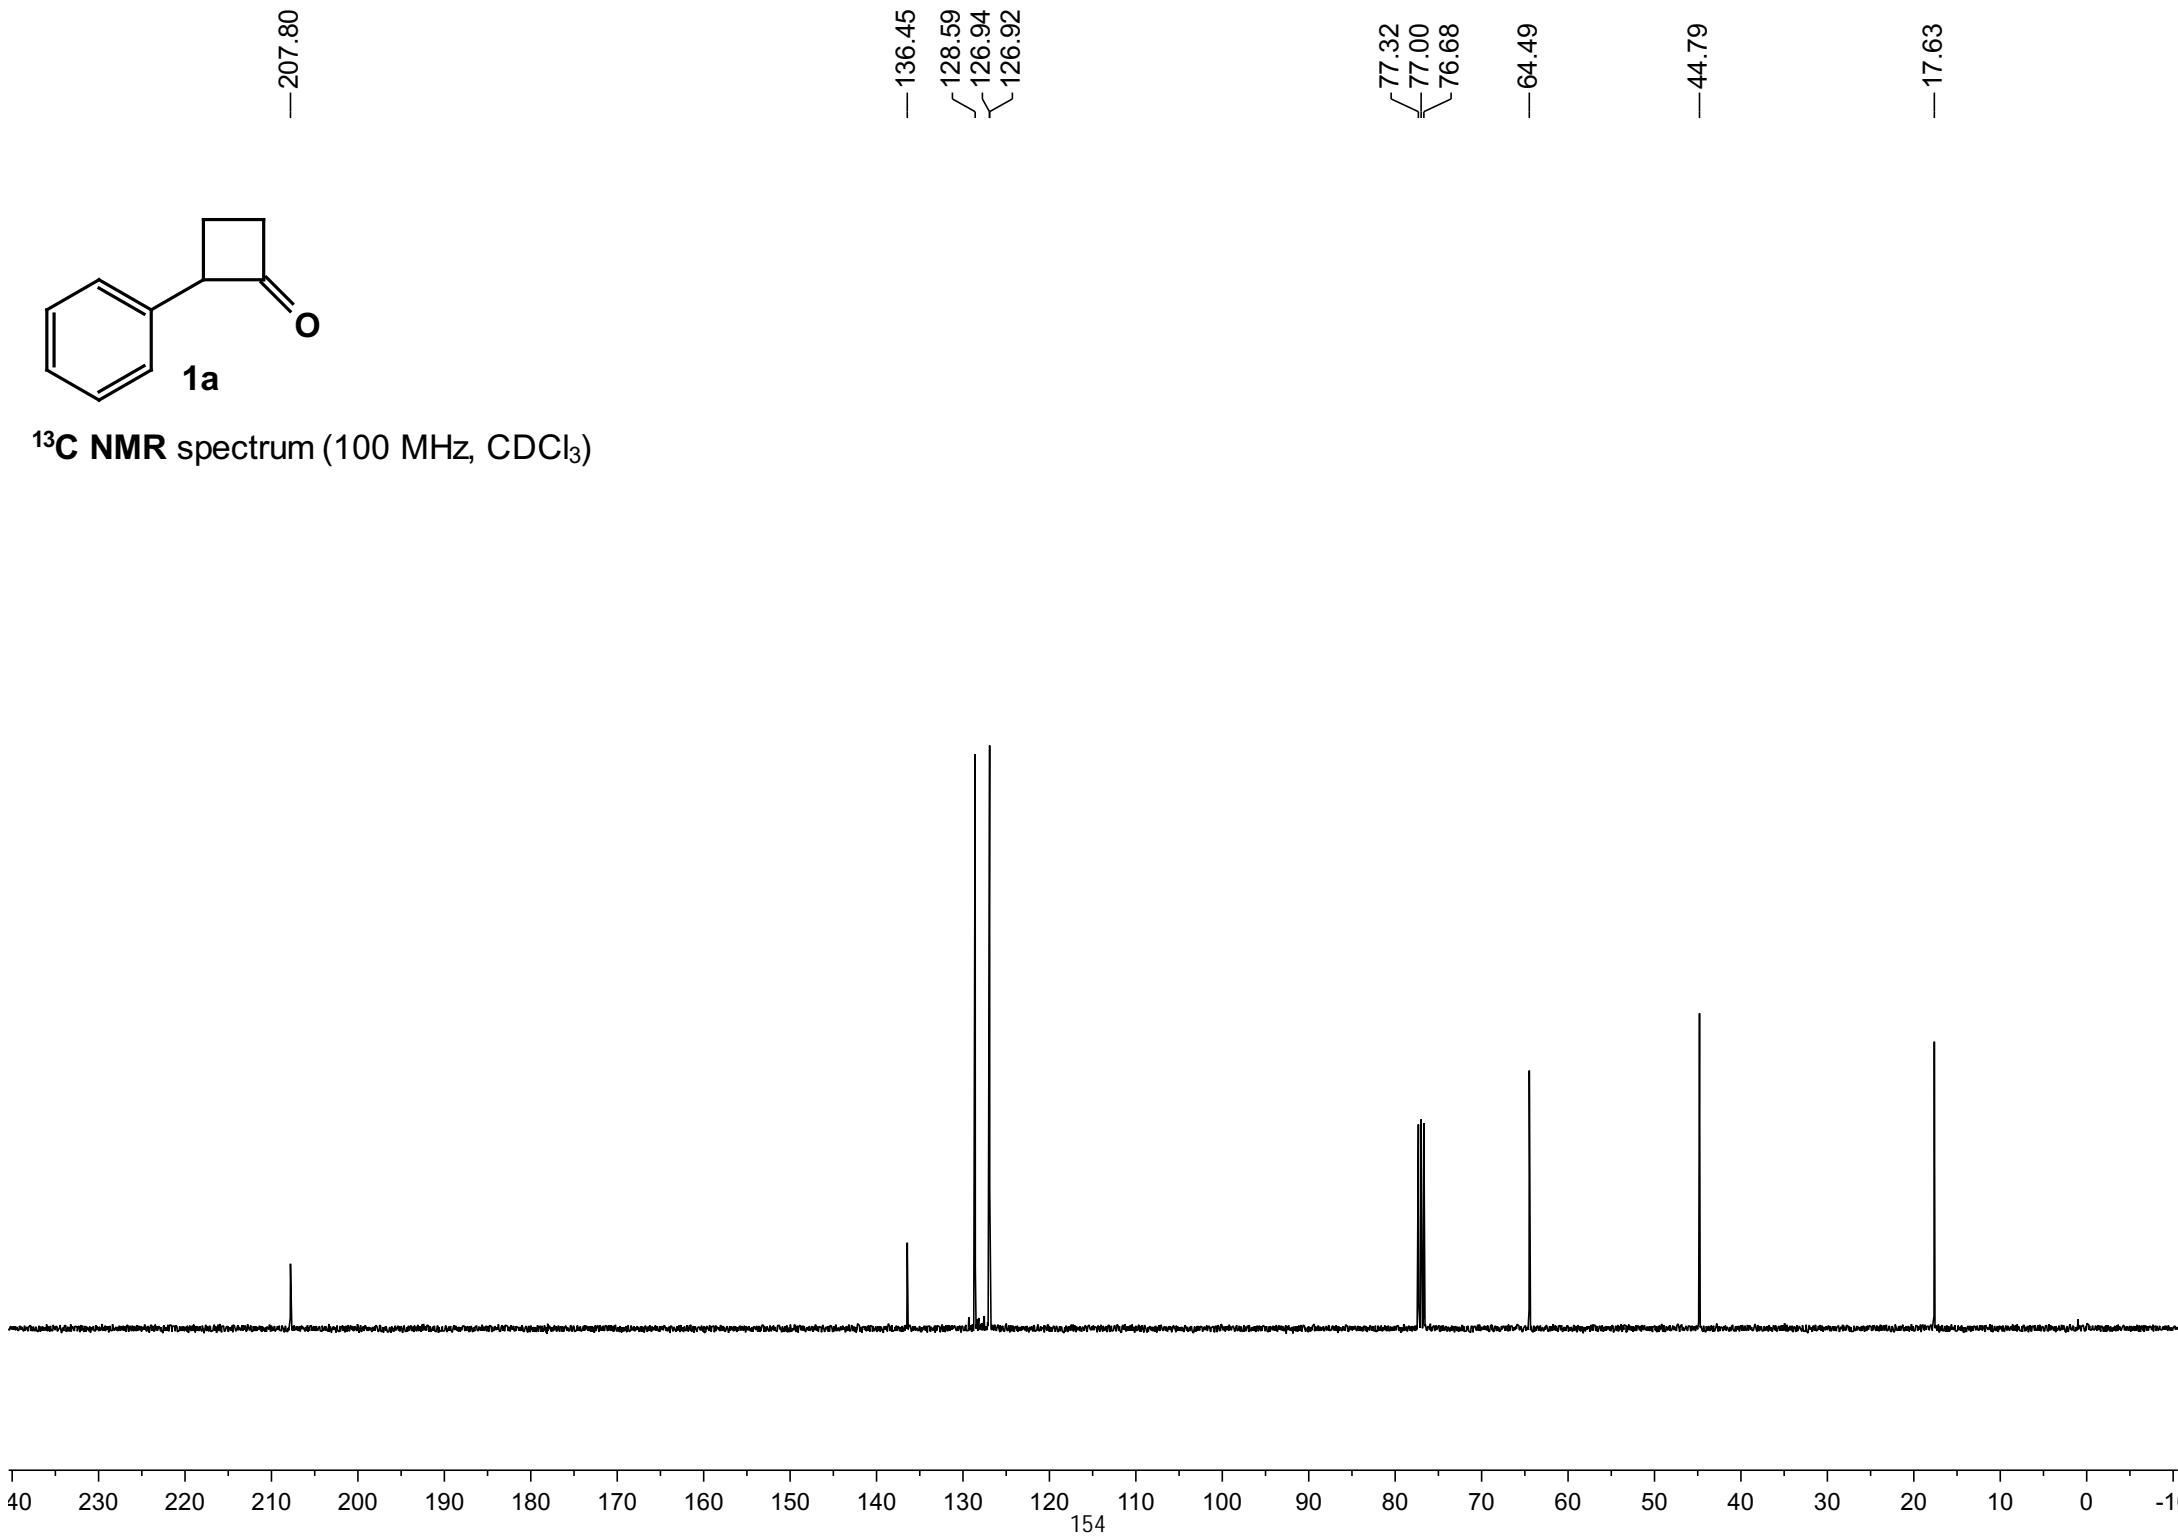

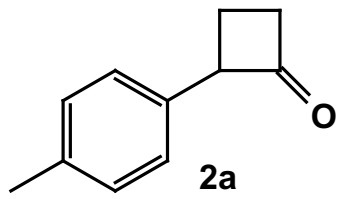

<sup>1</sup>H NMR spectrum (400 MHz, CDCl<sub>3</sub>)

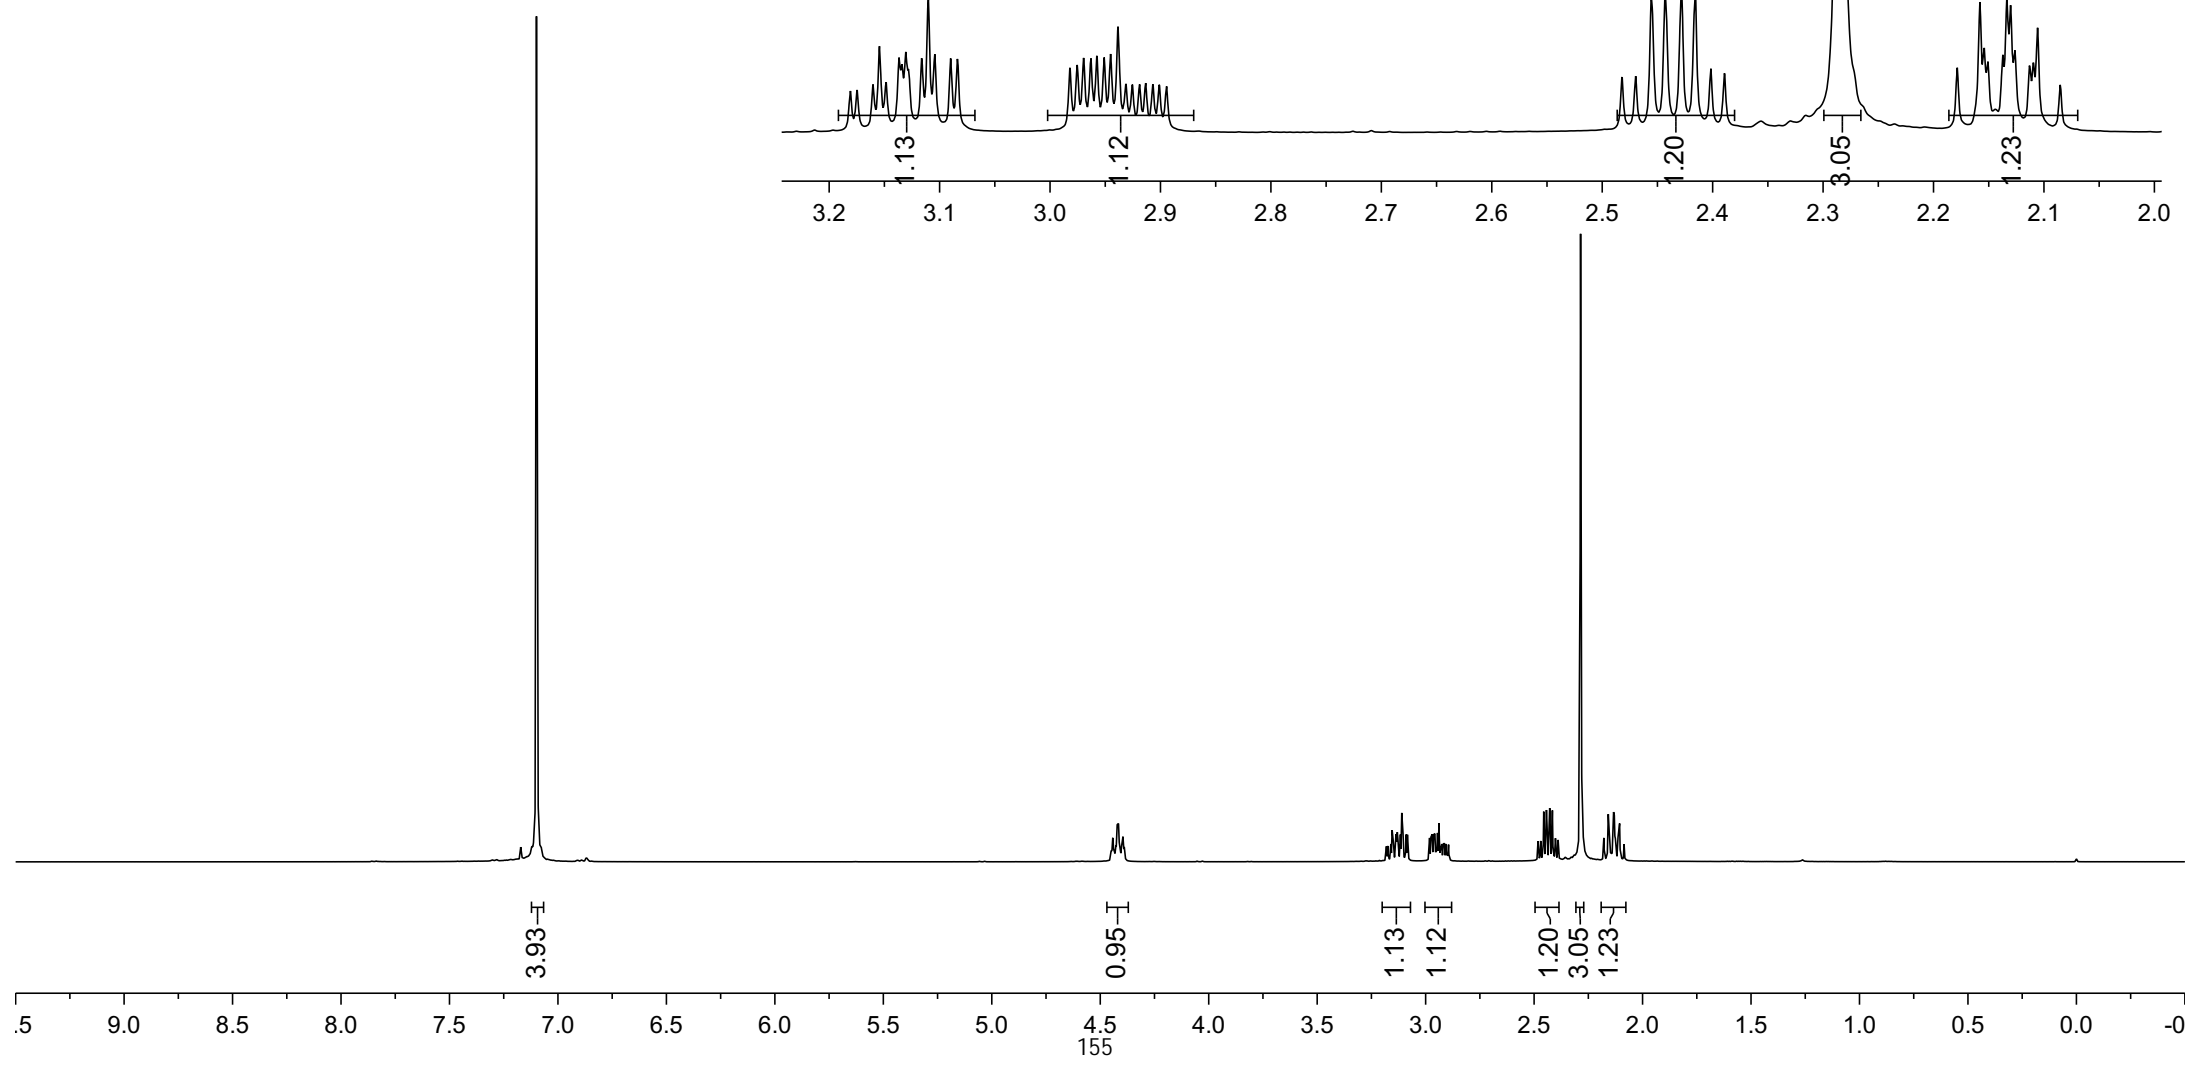





<sup>13</sup>C NMR spectrum (100 MHz, CDCl<sub>3</sub>)

—207.75

—136.25  
—133.38  
—129.04  
—126.64

77.32  
77.00  
76.68

—64.03

—44.49

—20.79  
—17.55

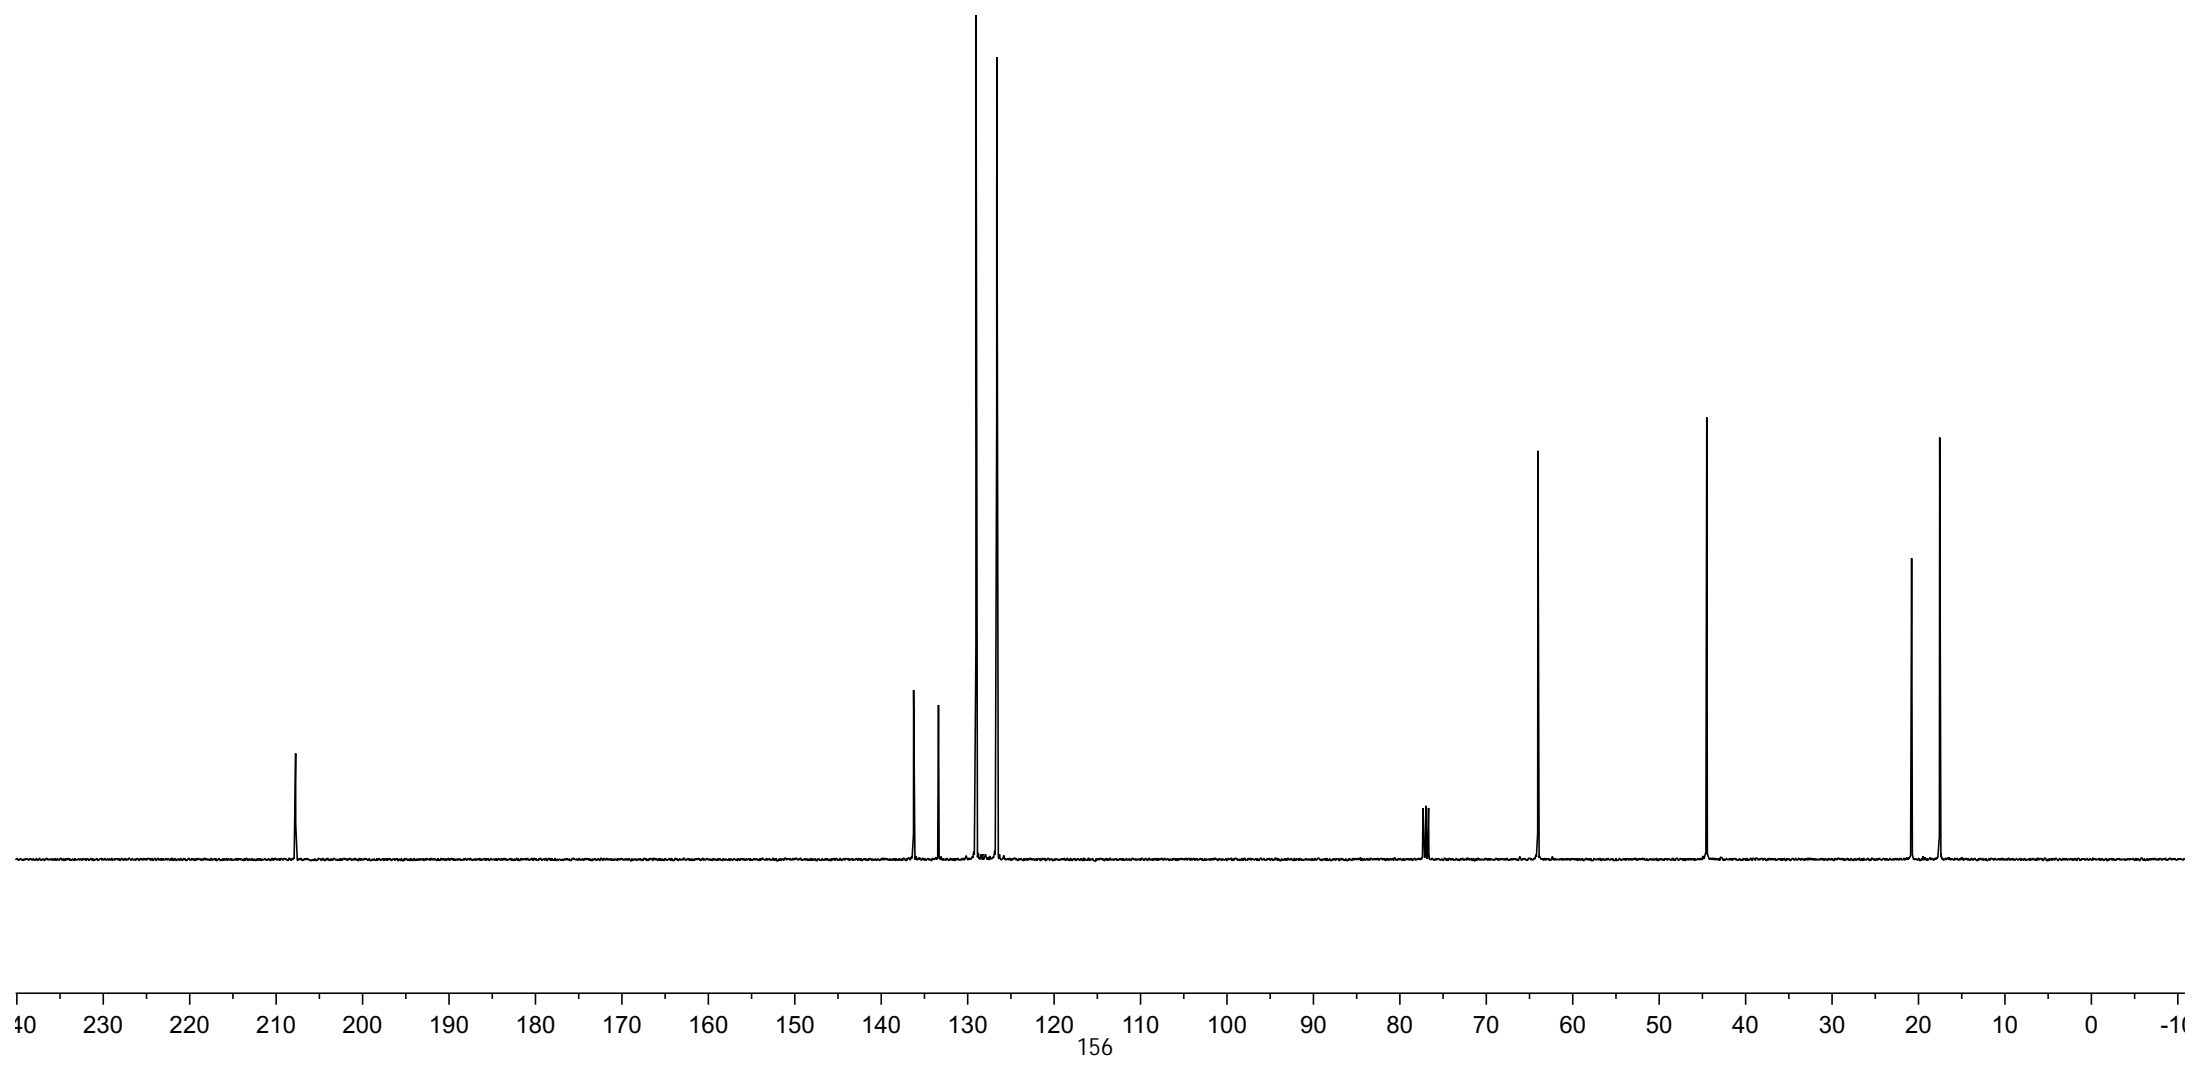

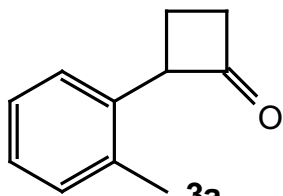

<sup>1</sup>H NMR spectrum (400 MHz, CDCl<sub>3</sub>)

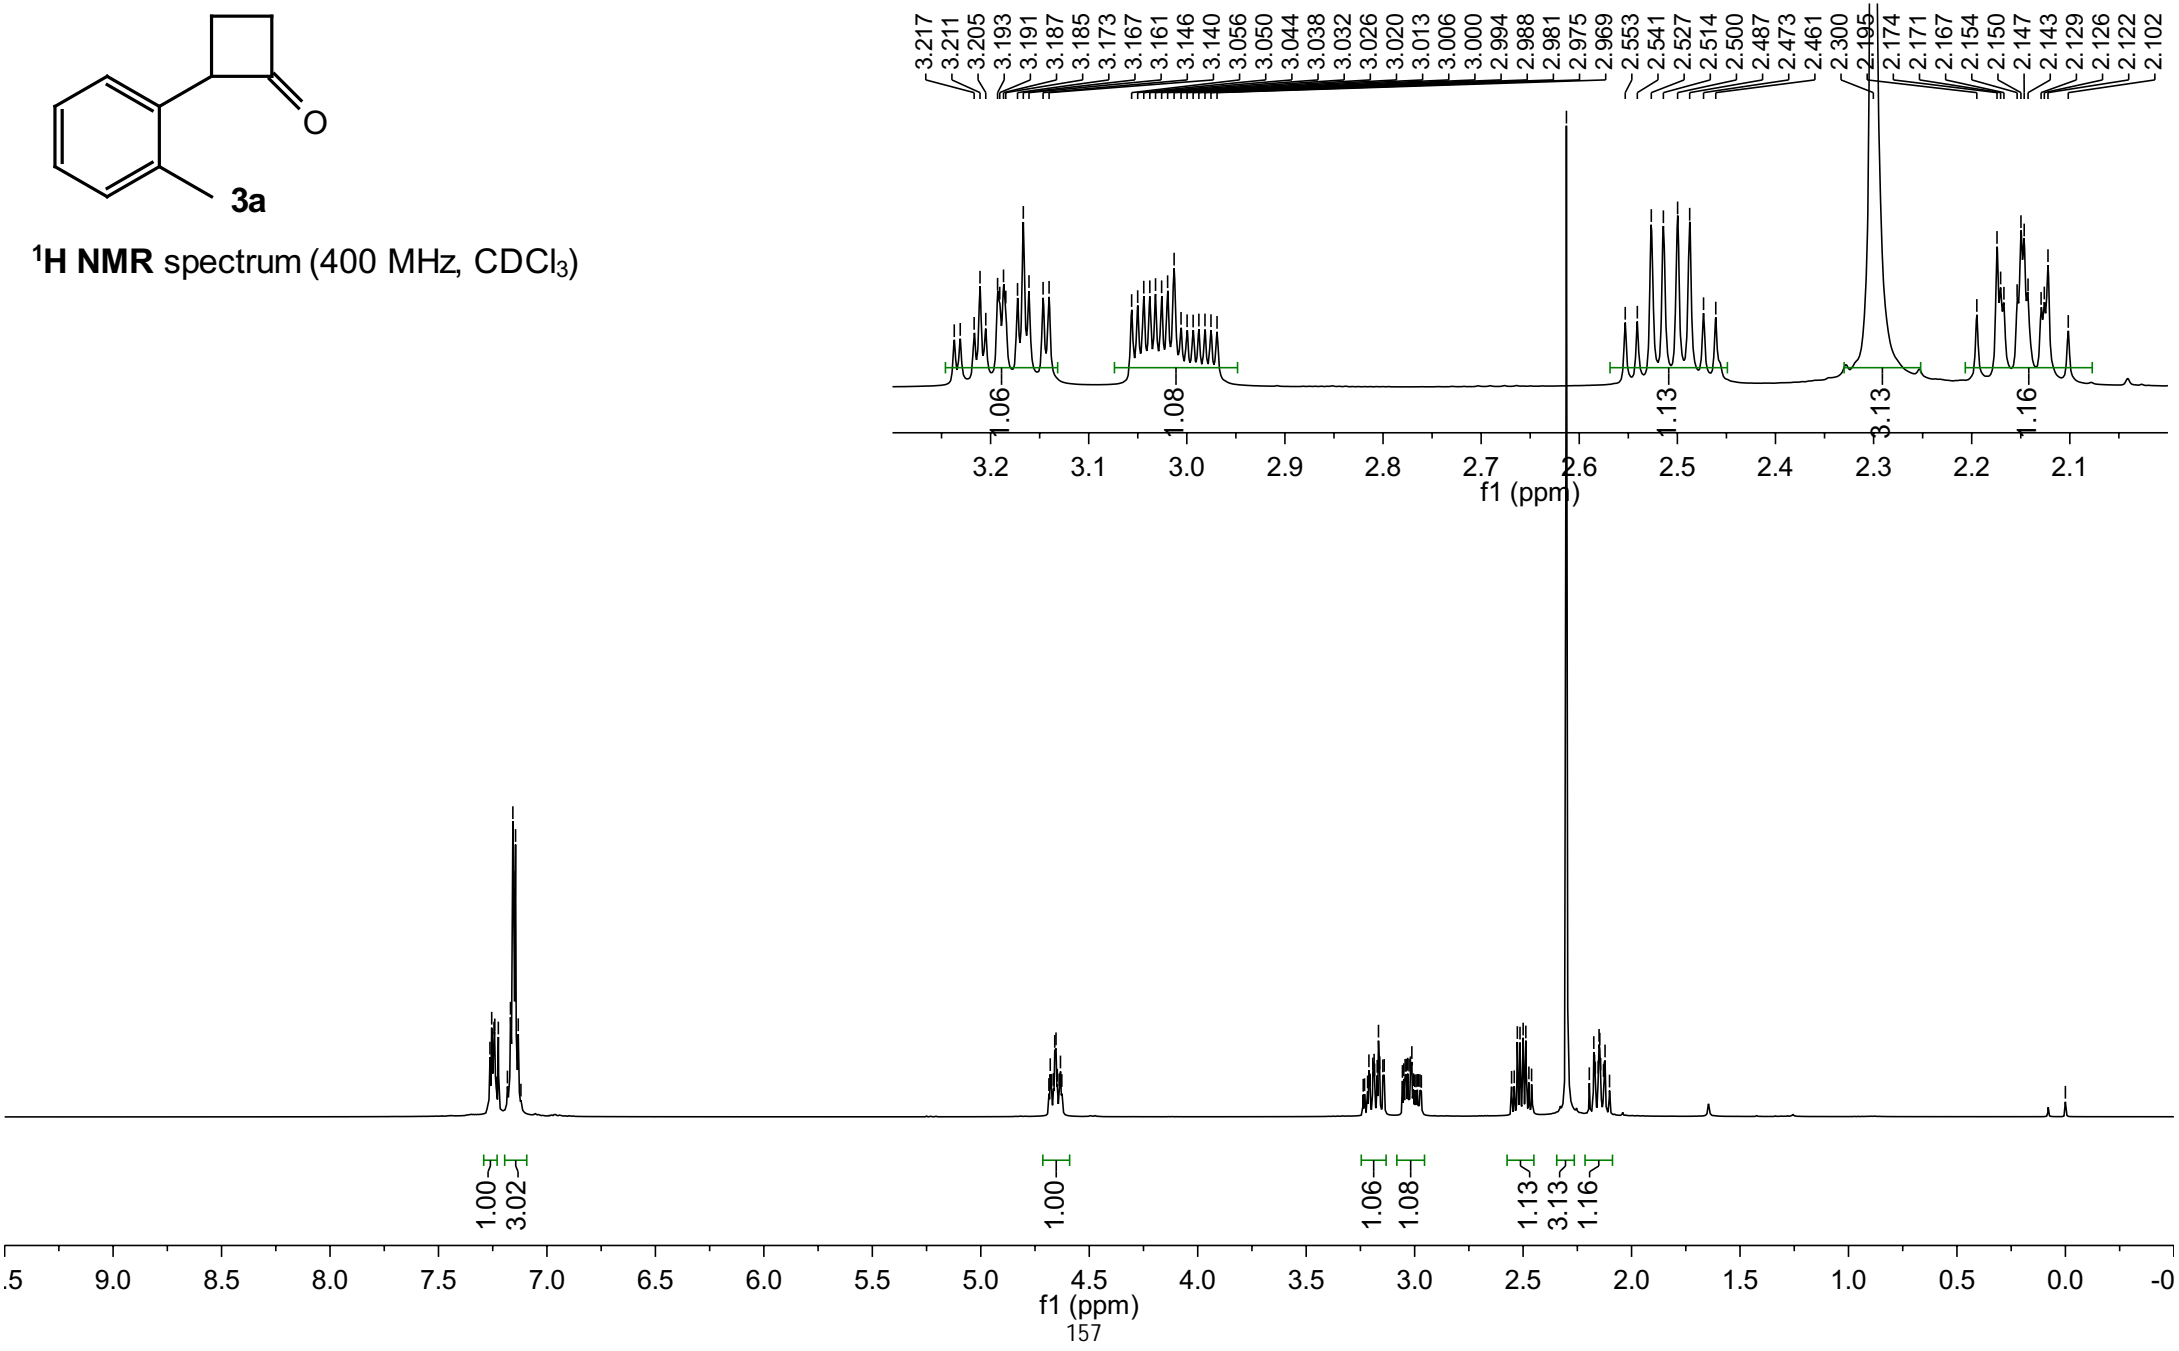



<sup>13</sup>C NMR spectrum (100 MHz, CDCl<sub>3</sub>)

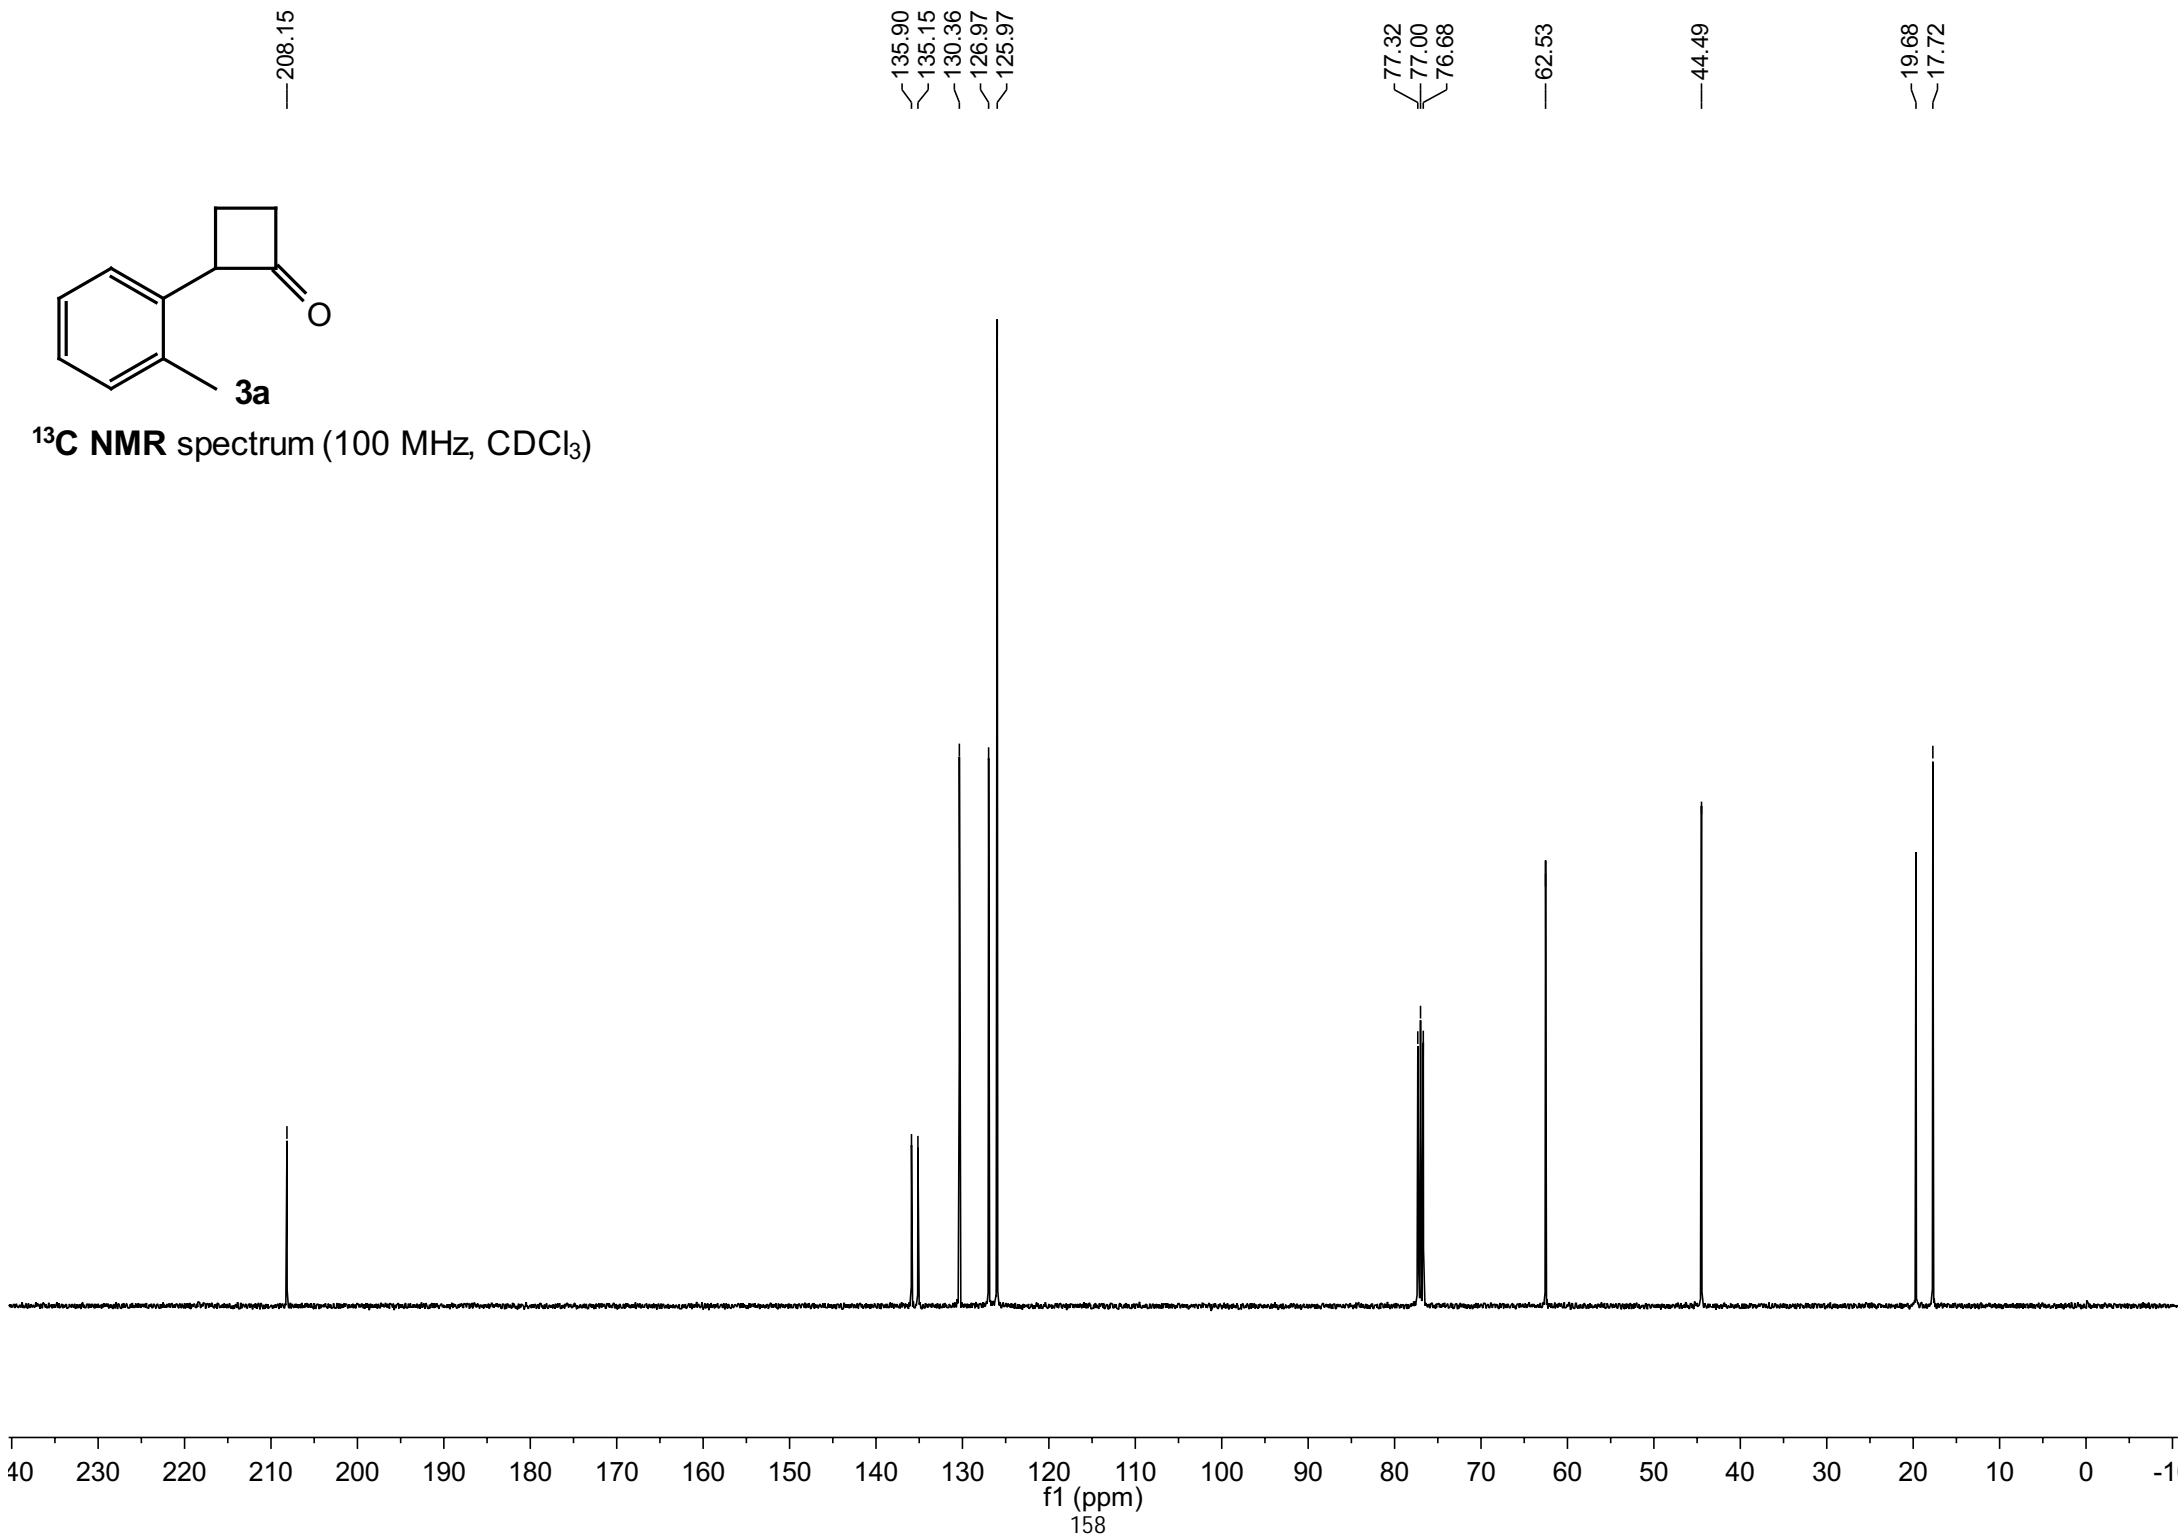

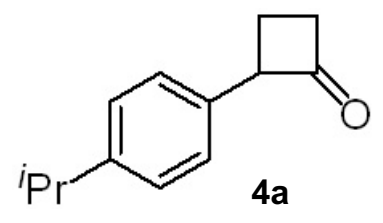

<sup>1</sup>H NMR spectrum (400 MHz, CDCl<sub>3</sub>)

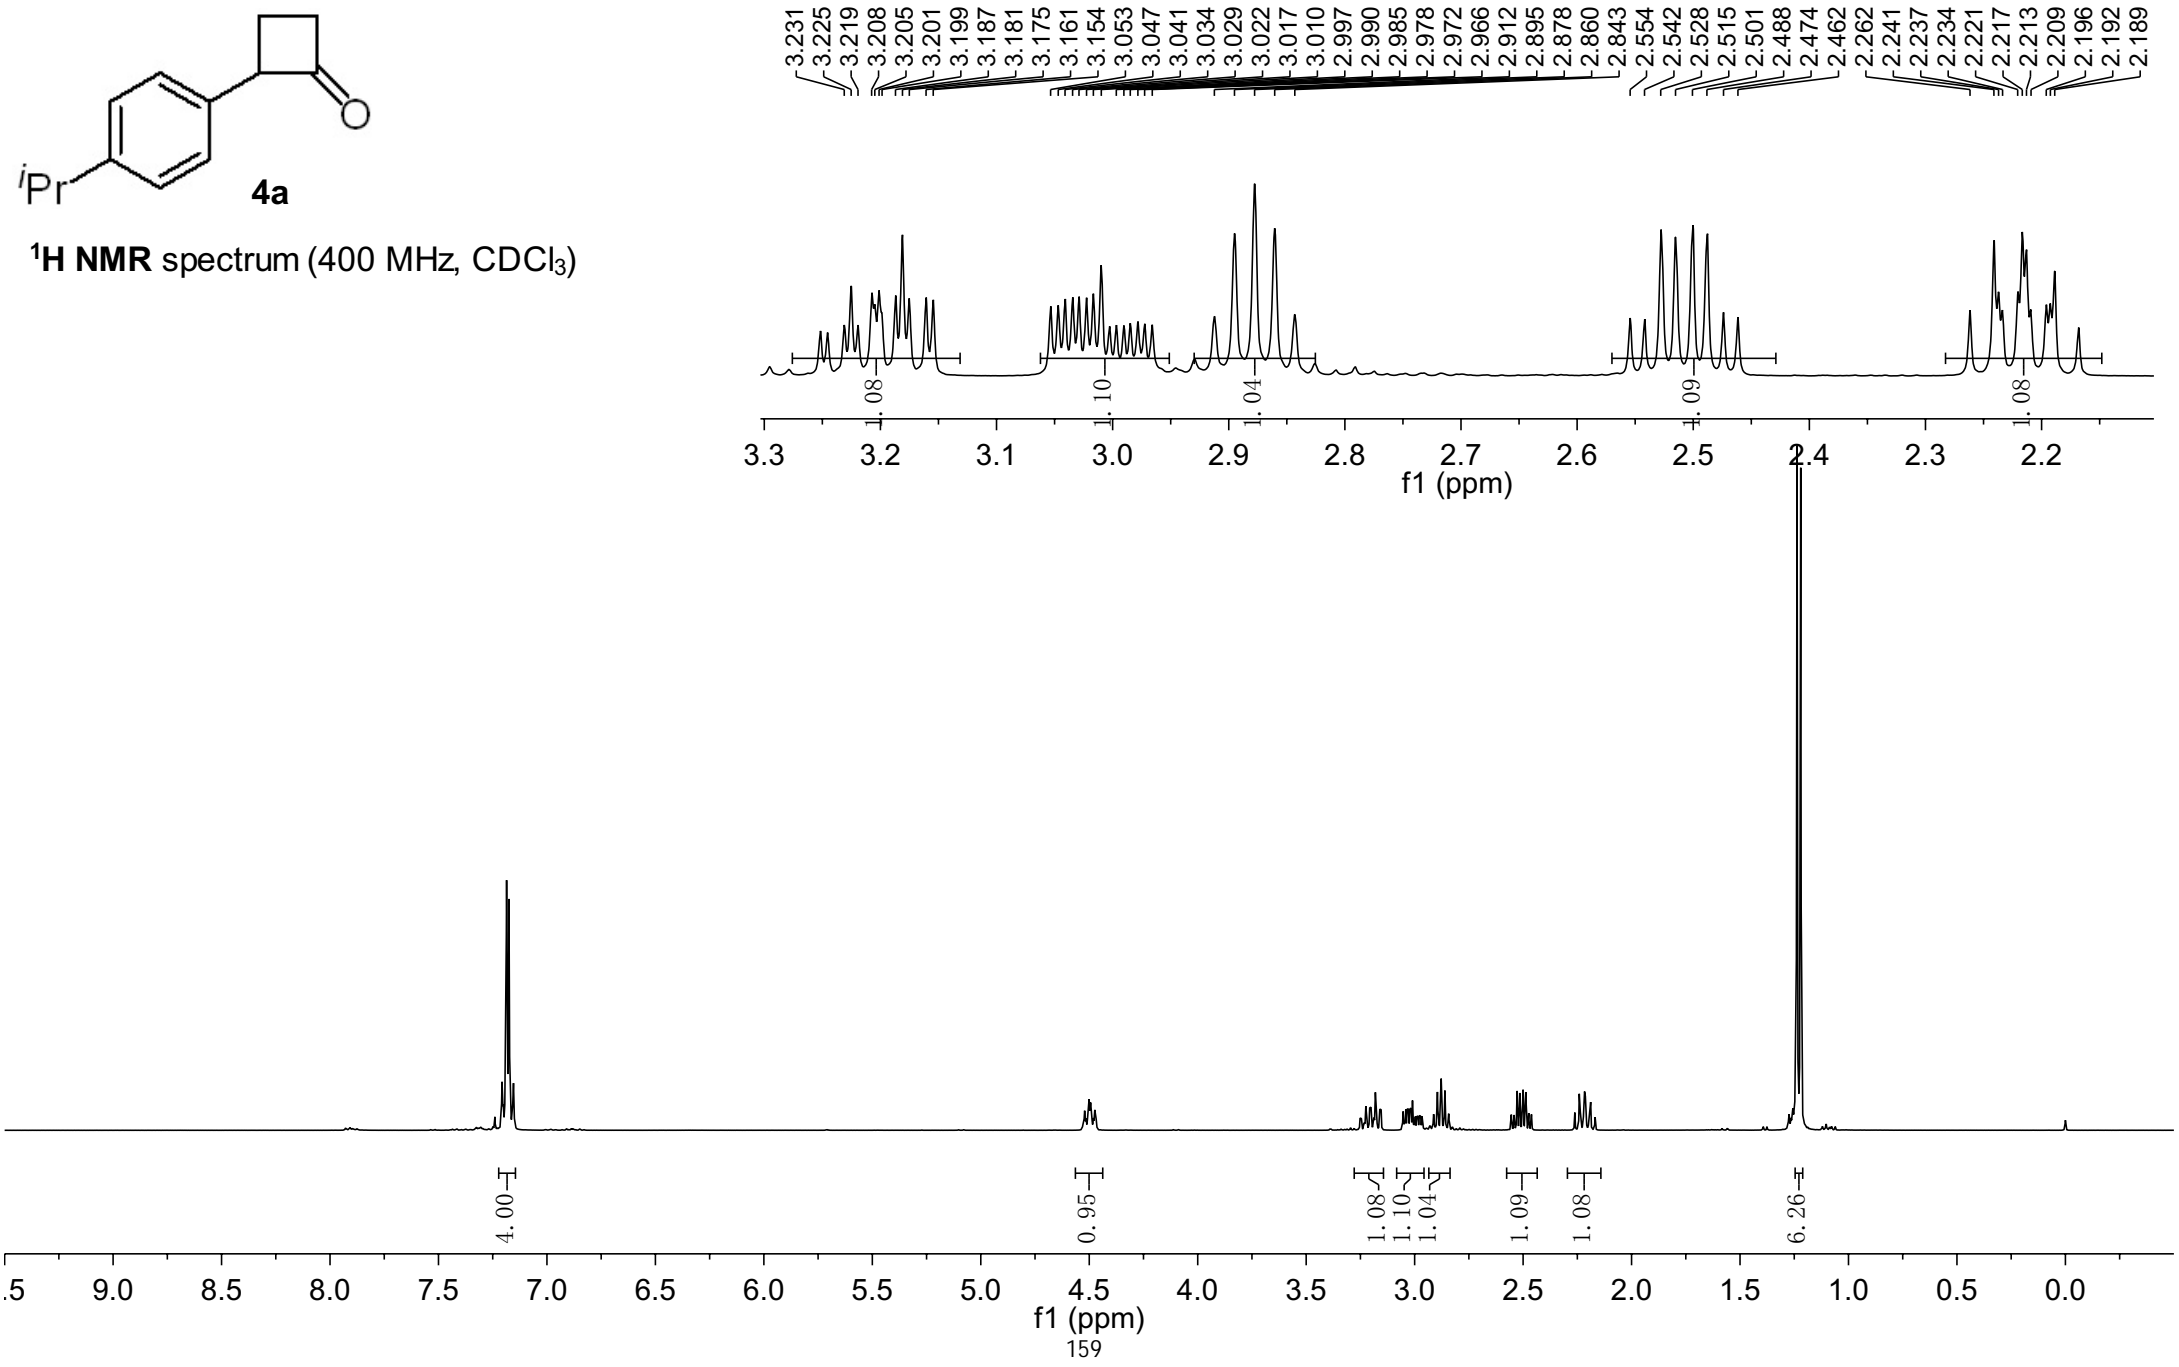

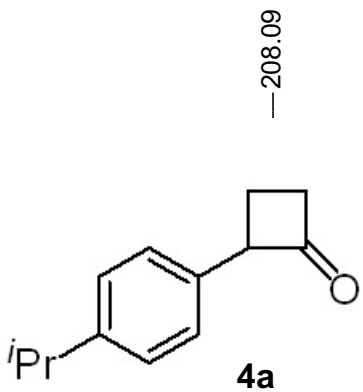

<sup>13</sup>C NMR spectrum (100 MHz, CDCl<sub>3</sub>)

— 208.09

— 147.60

— 133.85

126.89

126.65

77.32

77.00

76.68

— 64.32

— 44.76

— 33.75

— 23.94

— 17.74

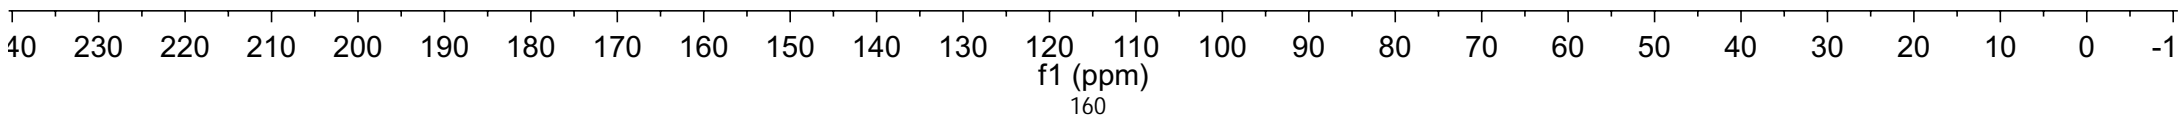

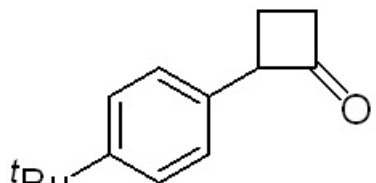

**5a**

<sup>1</sup>H NMR spectrum (400 MHz, CDCl<sub>3</sub>)

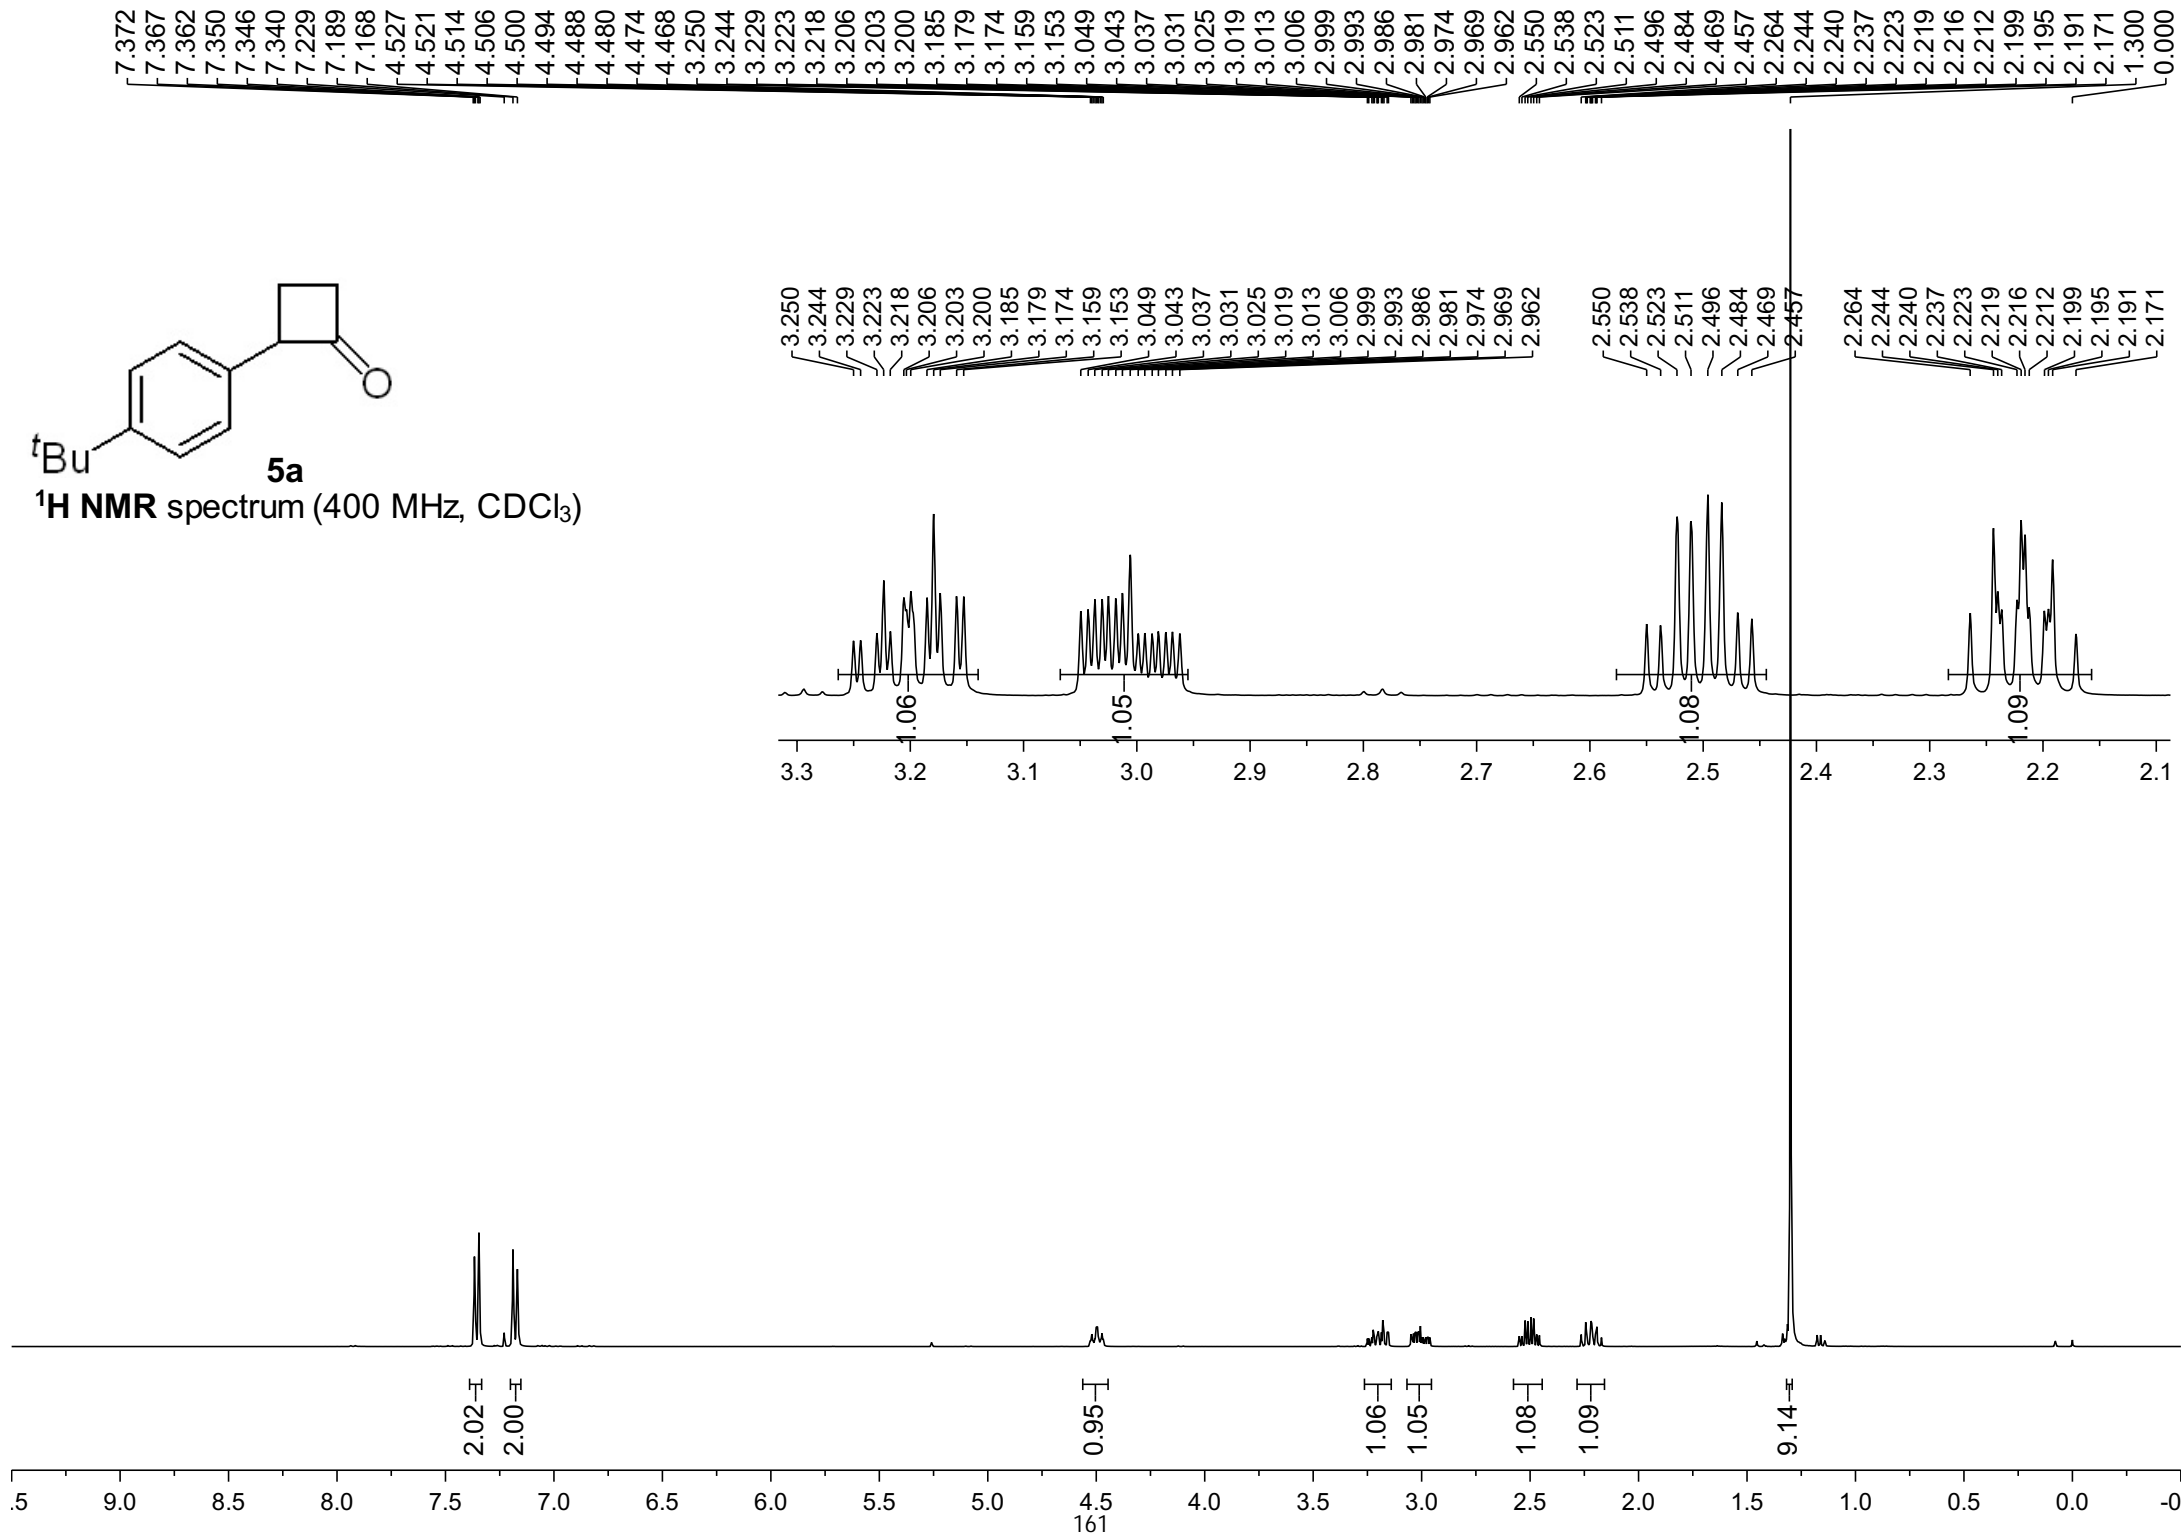

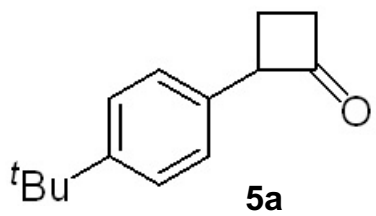

<sup>13</sup>C NMR spectrum (100 MHz, CDCl<sub>3</sub>)

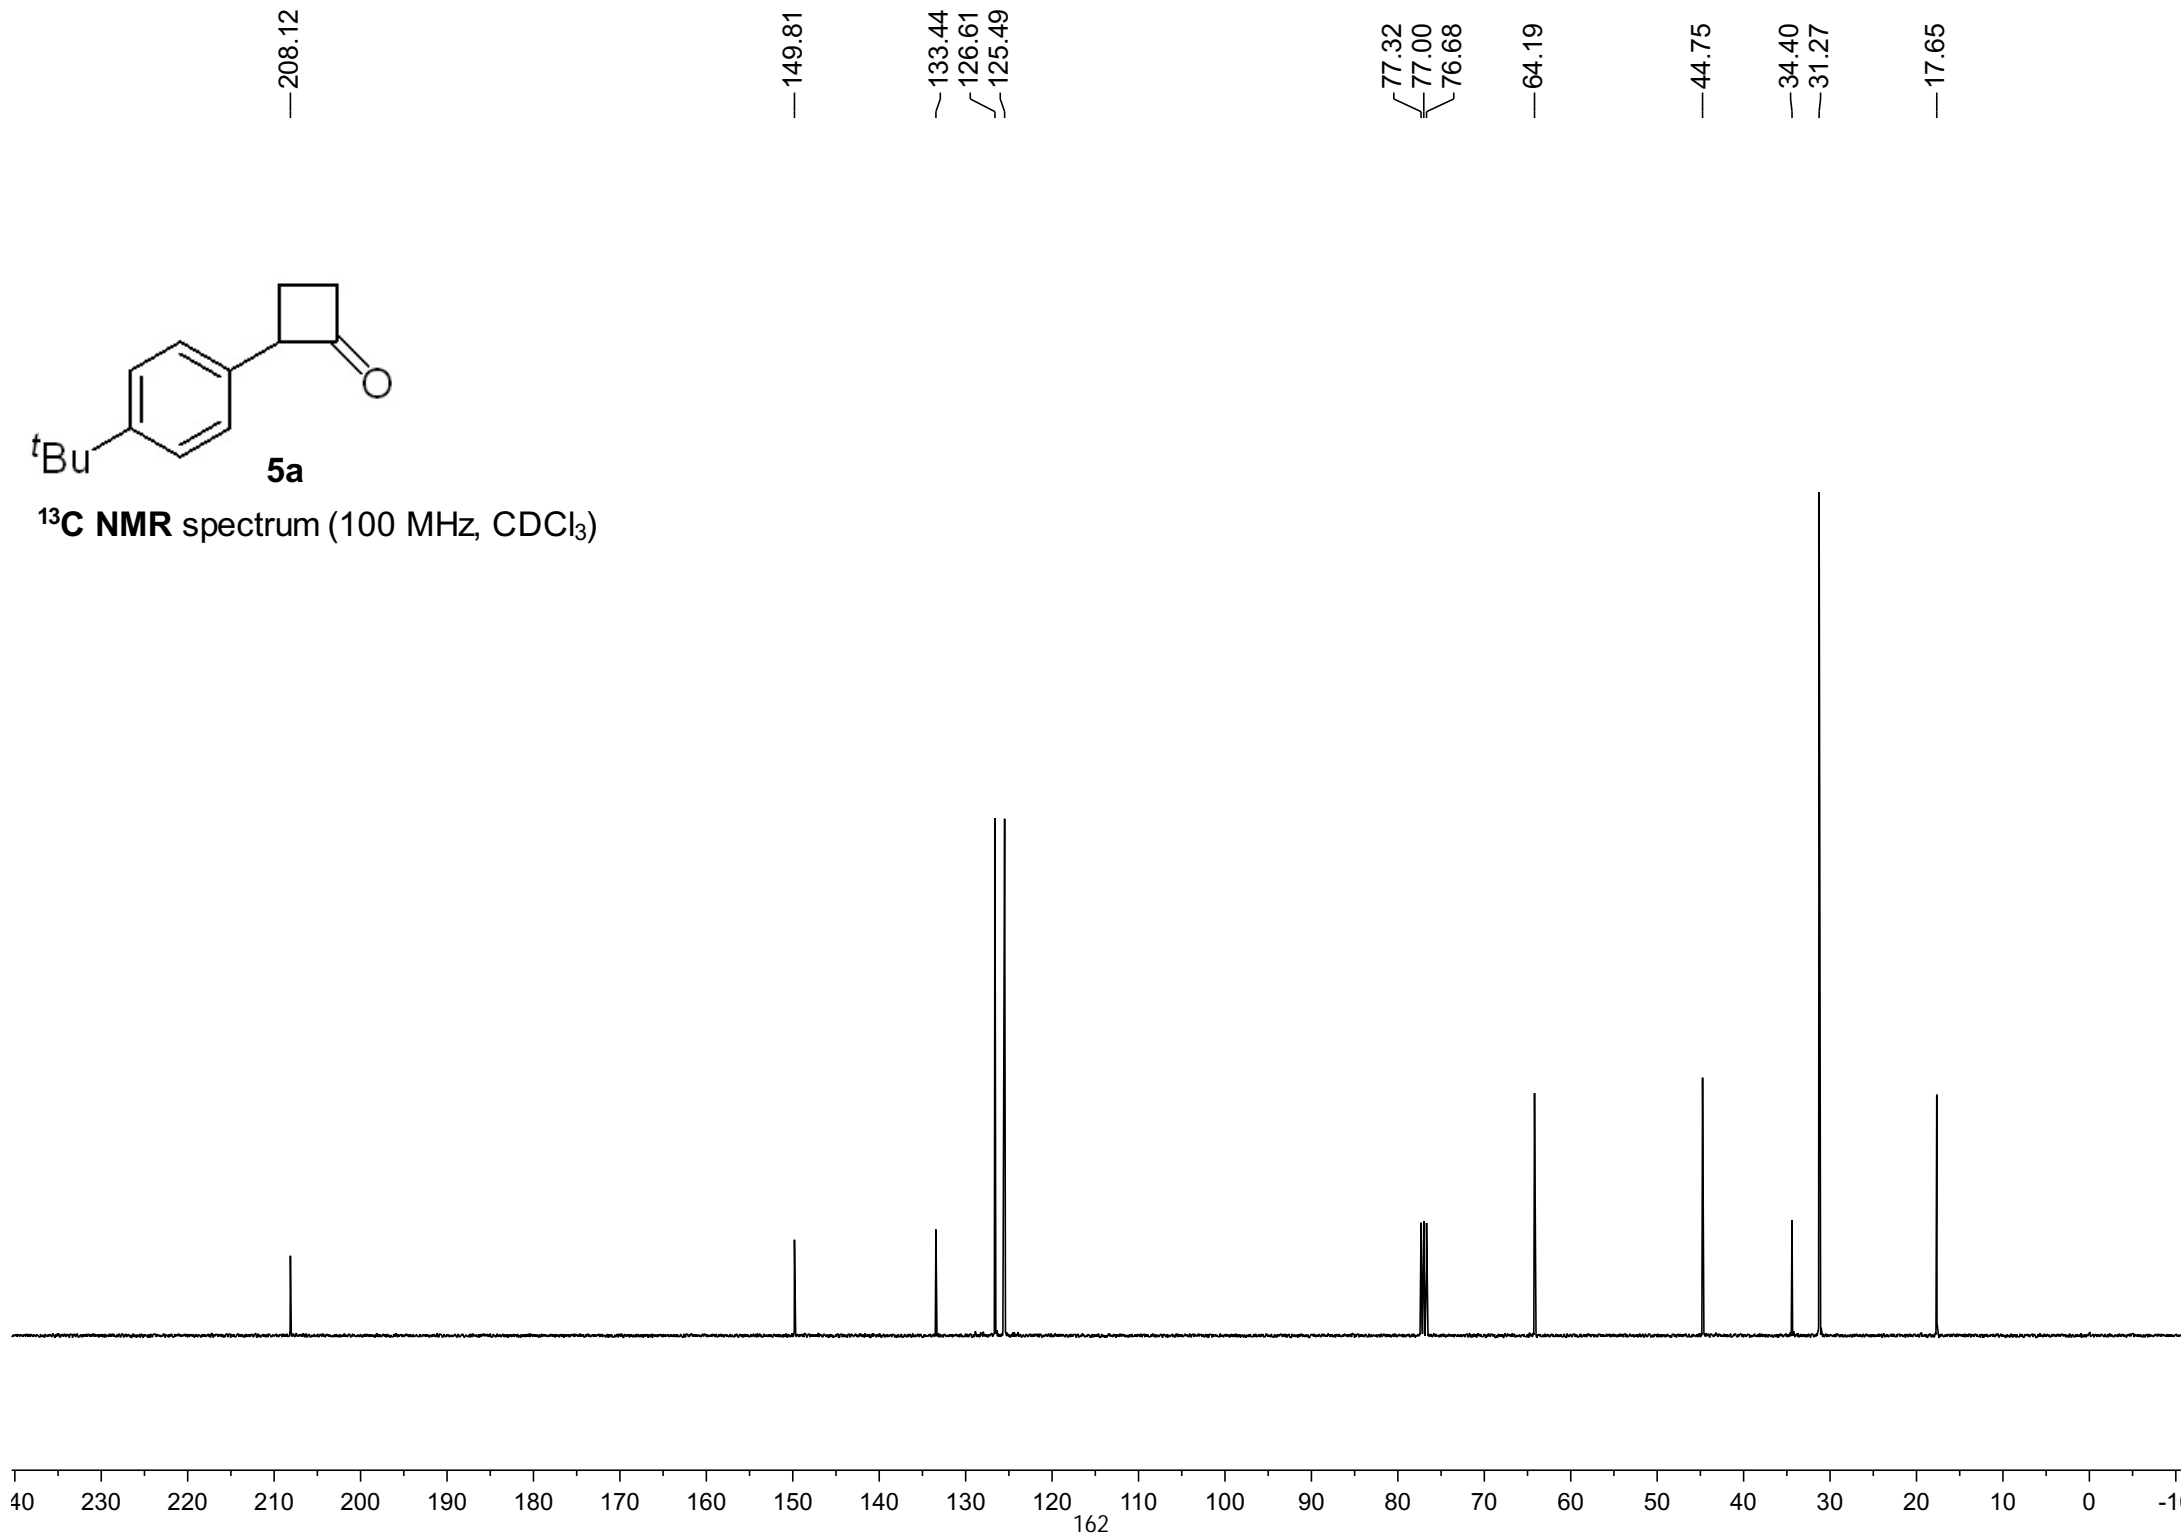

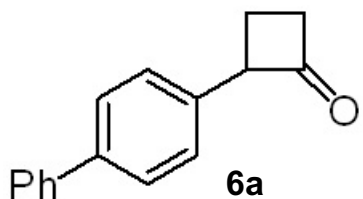

<sup>1</sup>H NMR spectrum (400 MHz, CDCl<sub>3</sub>)

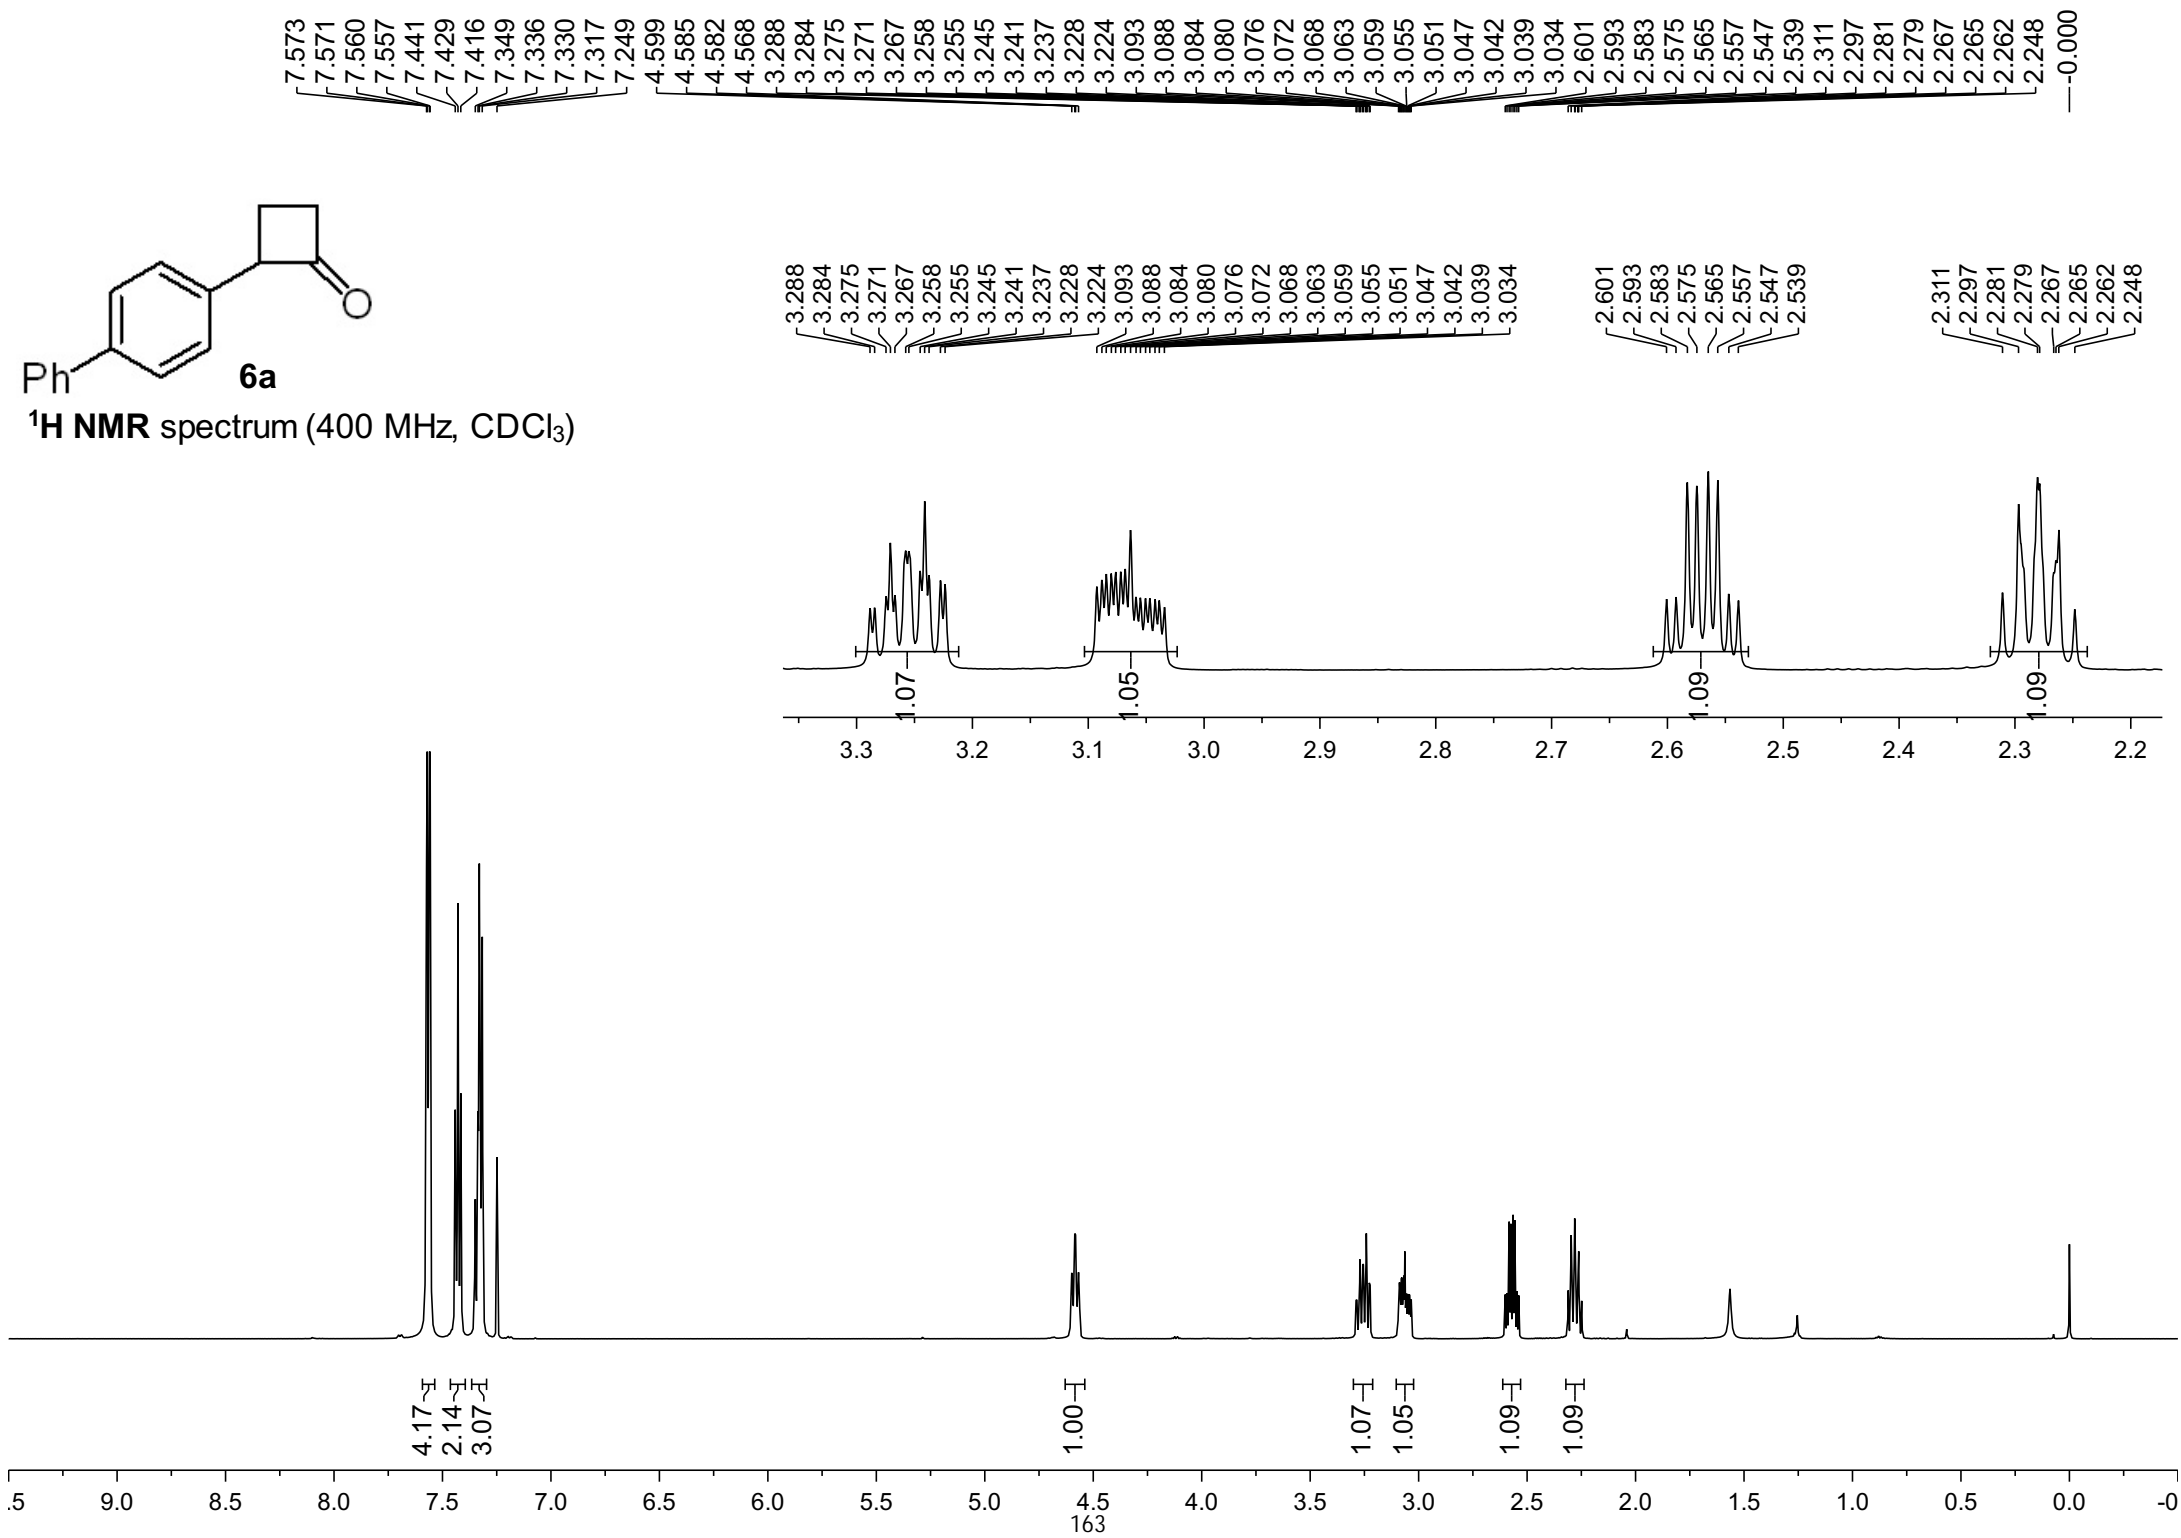



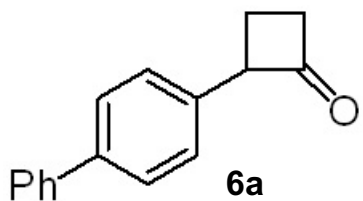

<sup>13</sup>C NMR spectrum (100 MHz, CDCl<sub>3</sub>)

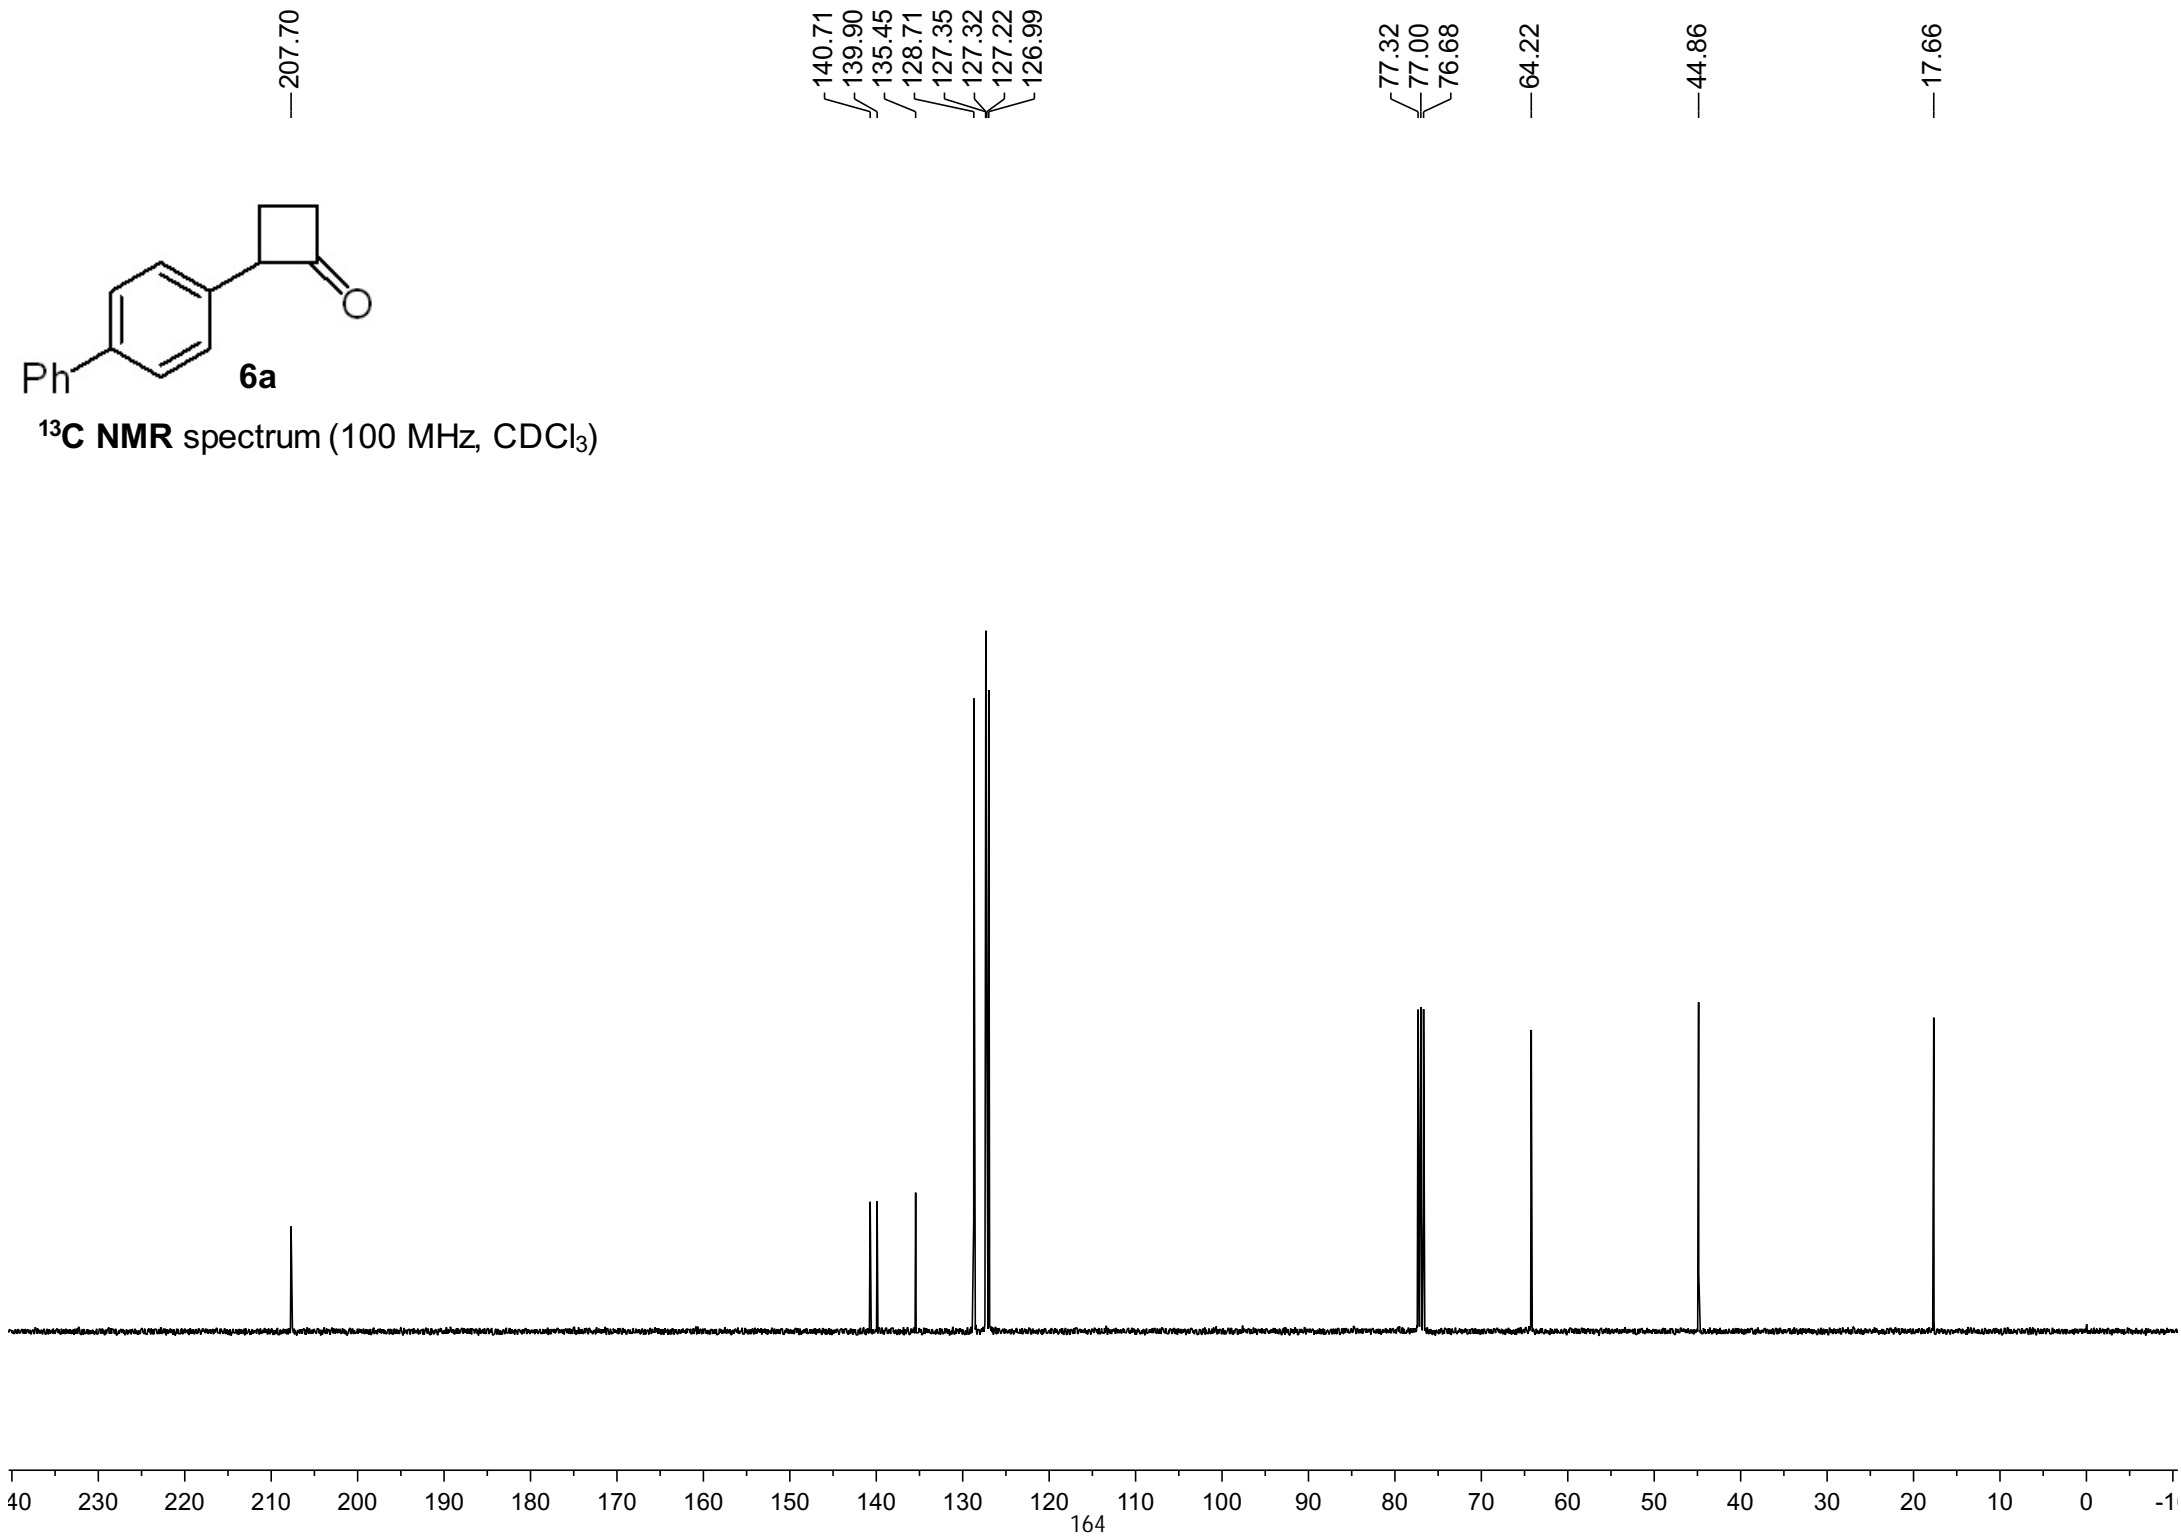

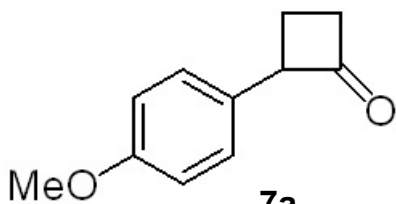

<sup>1</sup>H NMR spectrum (600 MHz, CDCl<sub>3</sub>)

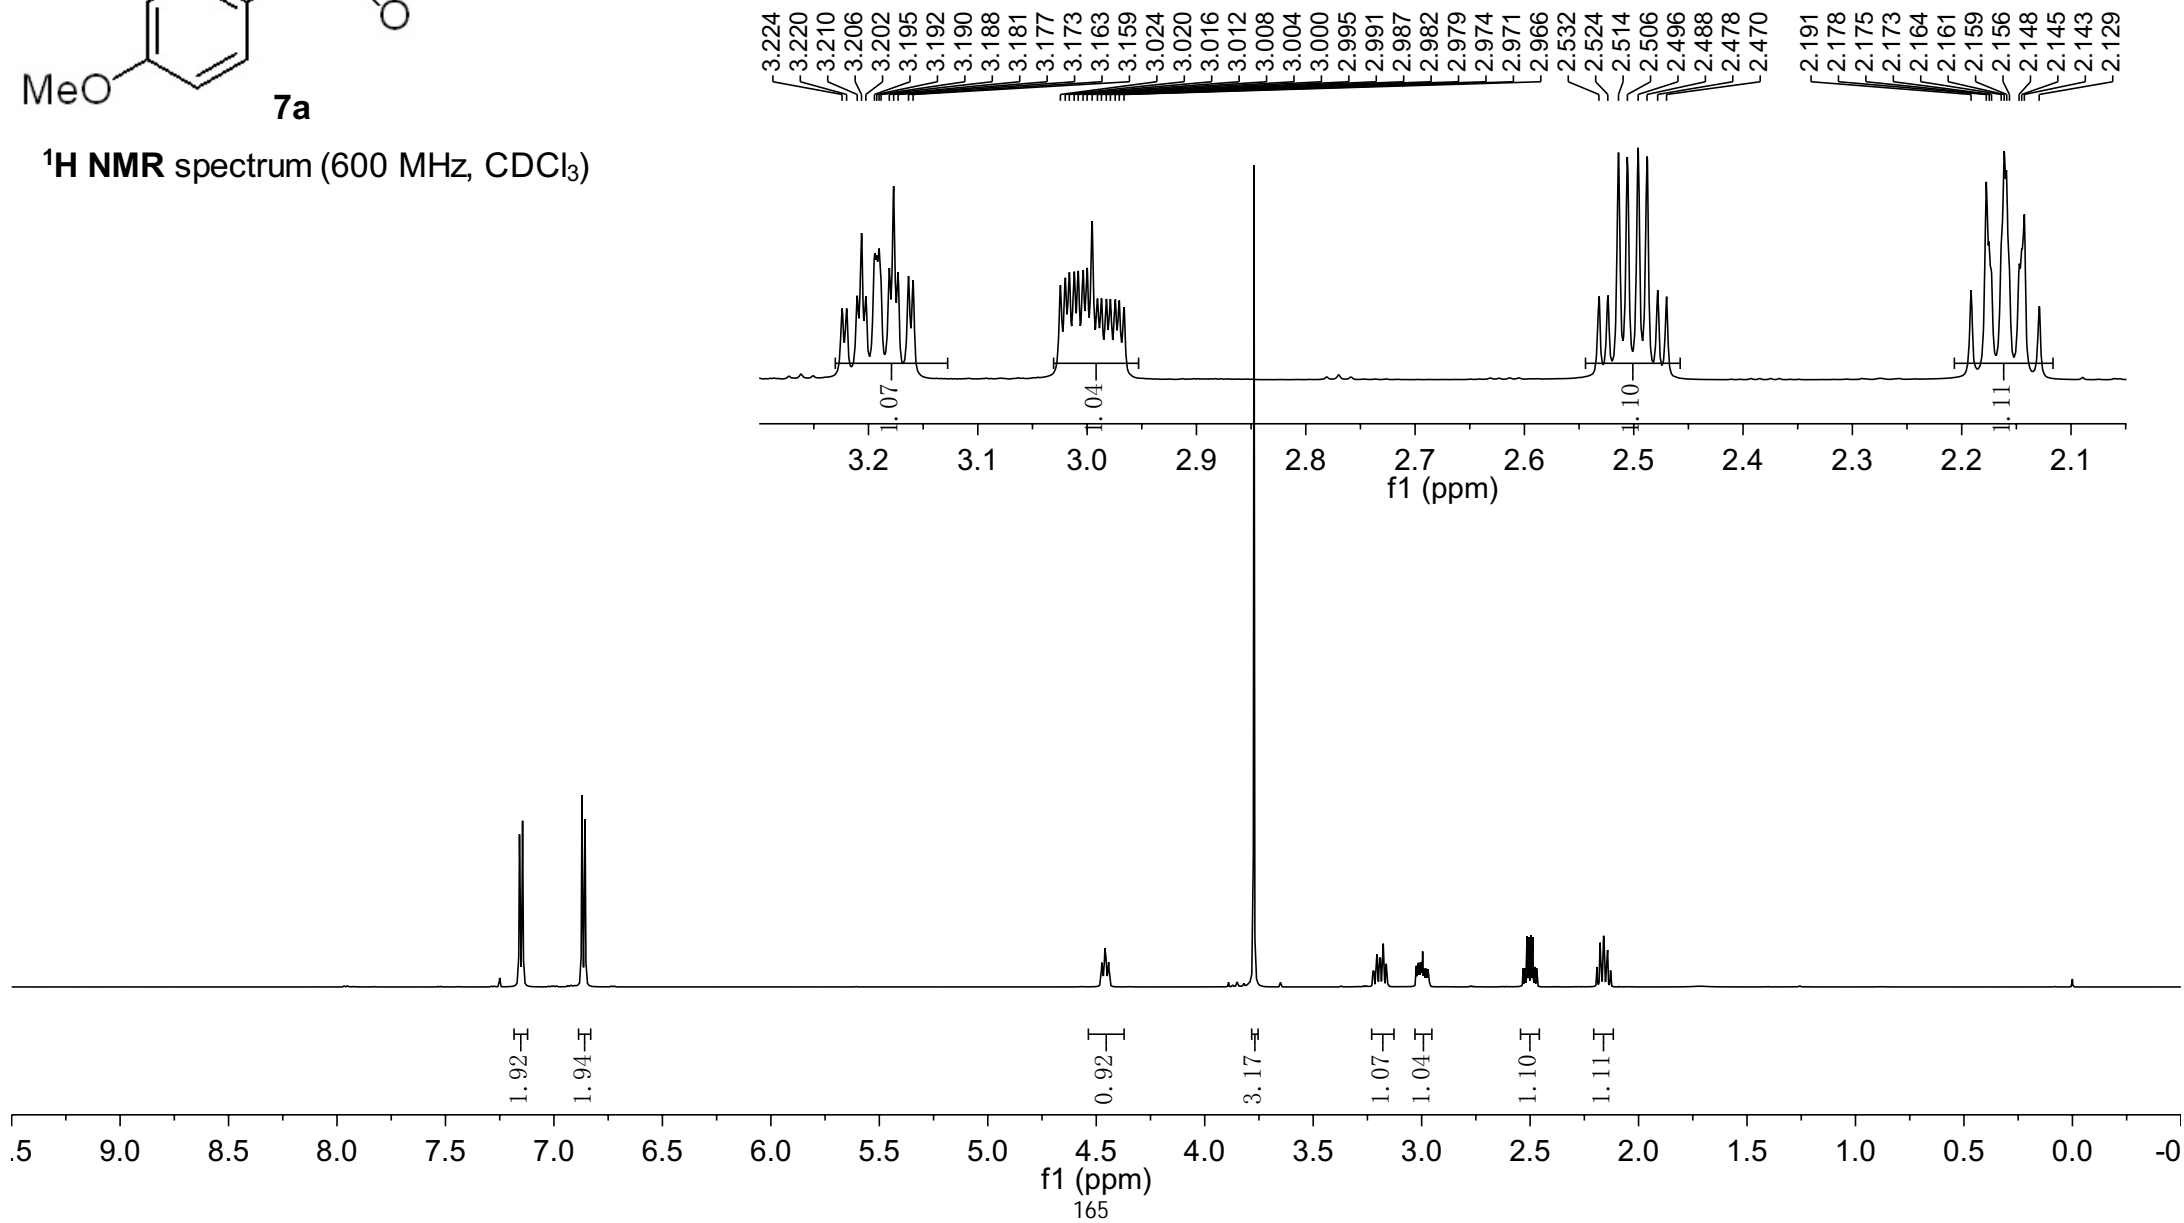

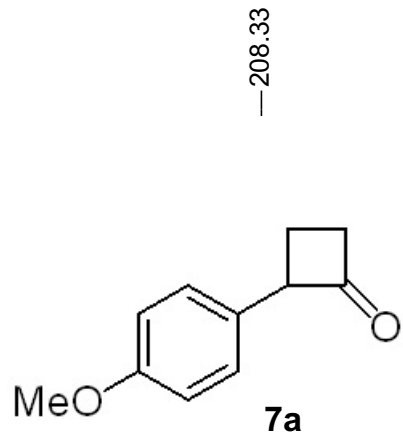

<sup>13</sup>C NMR spectrum (150 MHz, CDCl<sub>3</sub>)

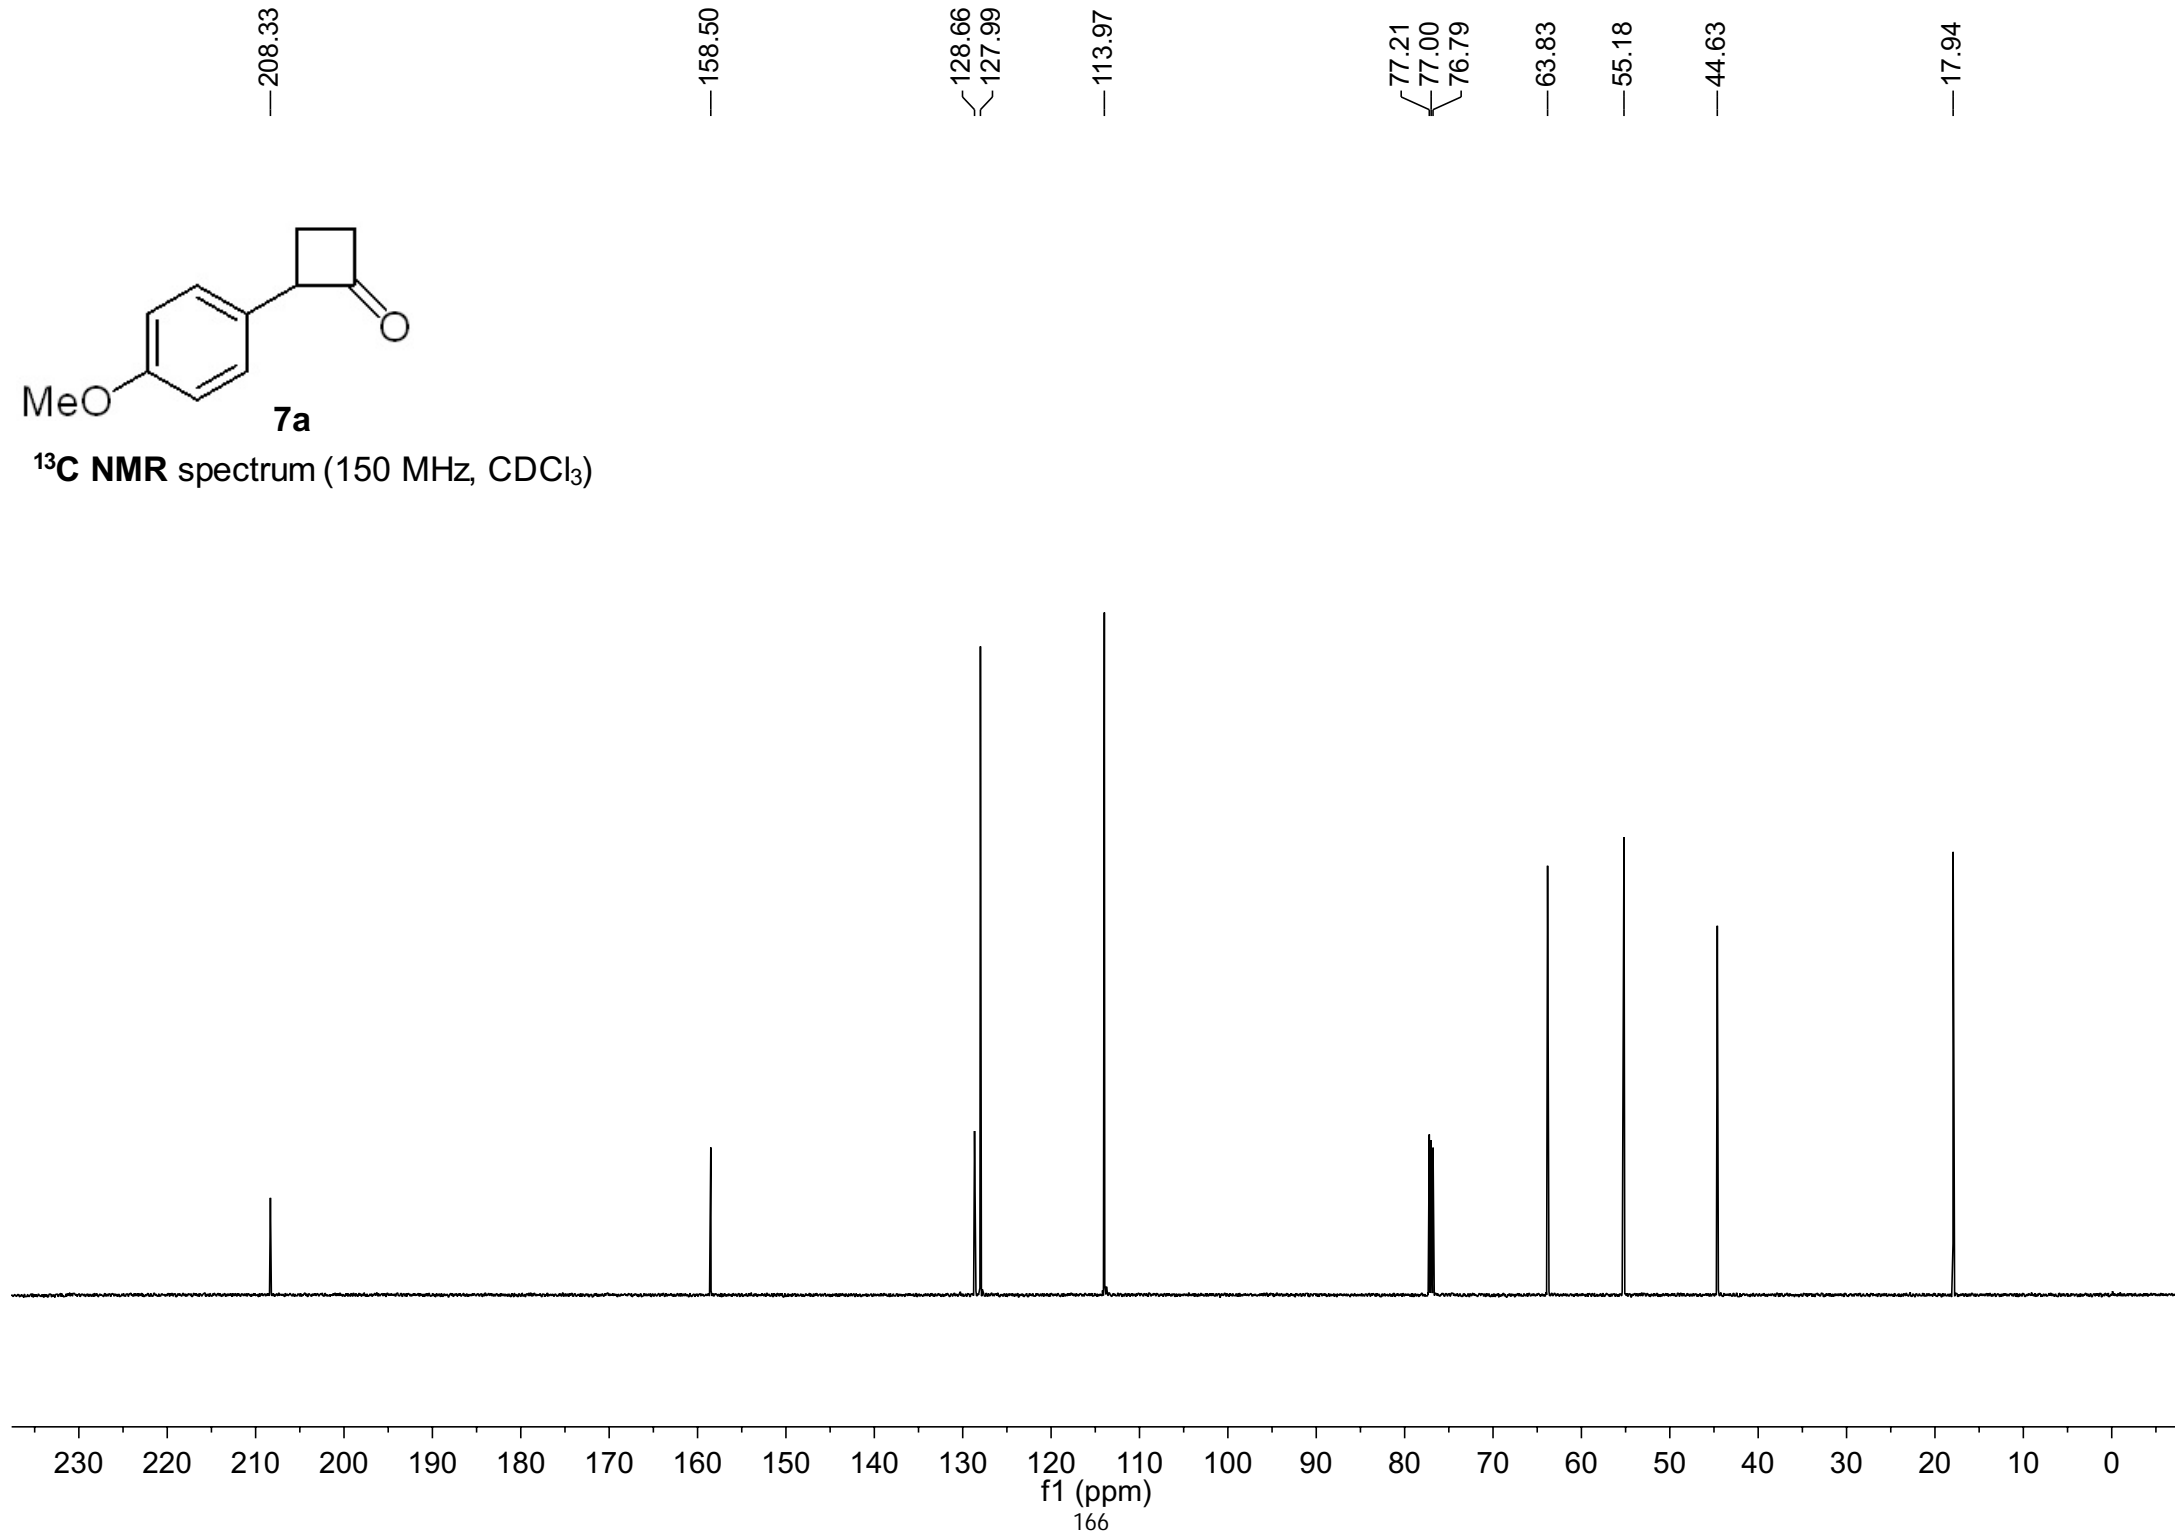

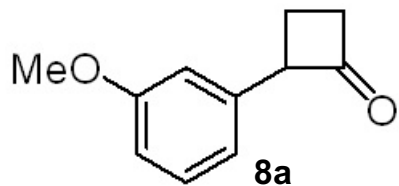

<sup>1</sup>H NMR spectrum (400 MHz, CDCl<sub>3</sub>)

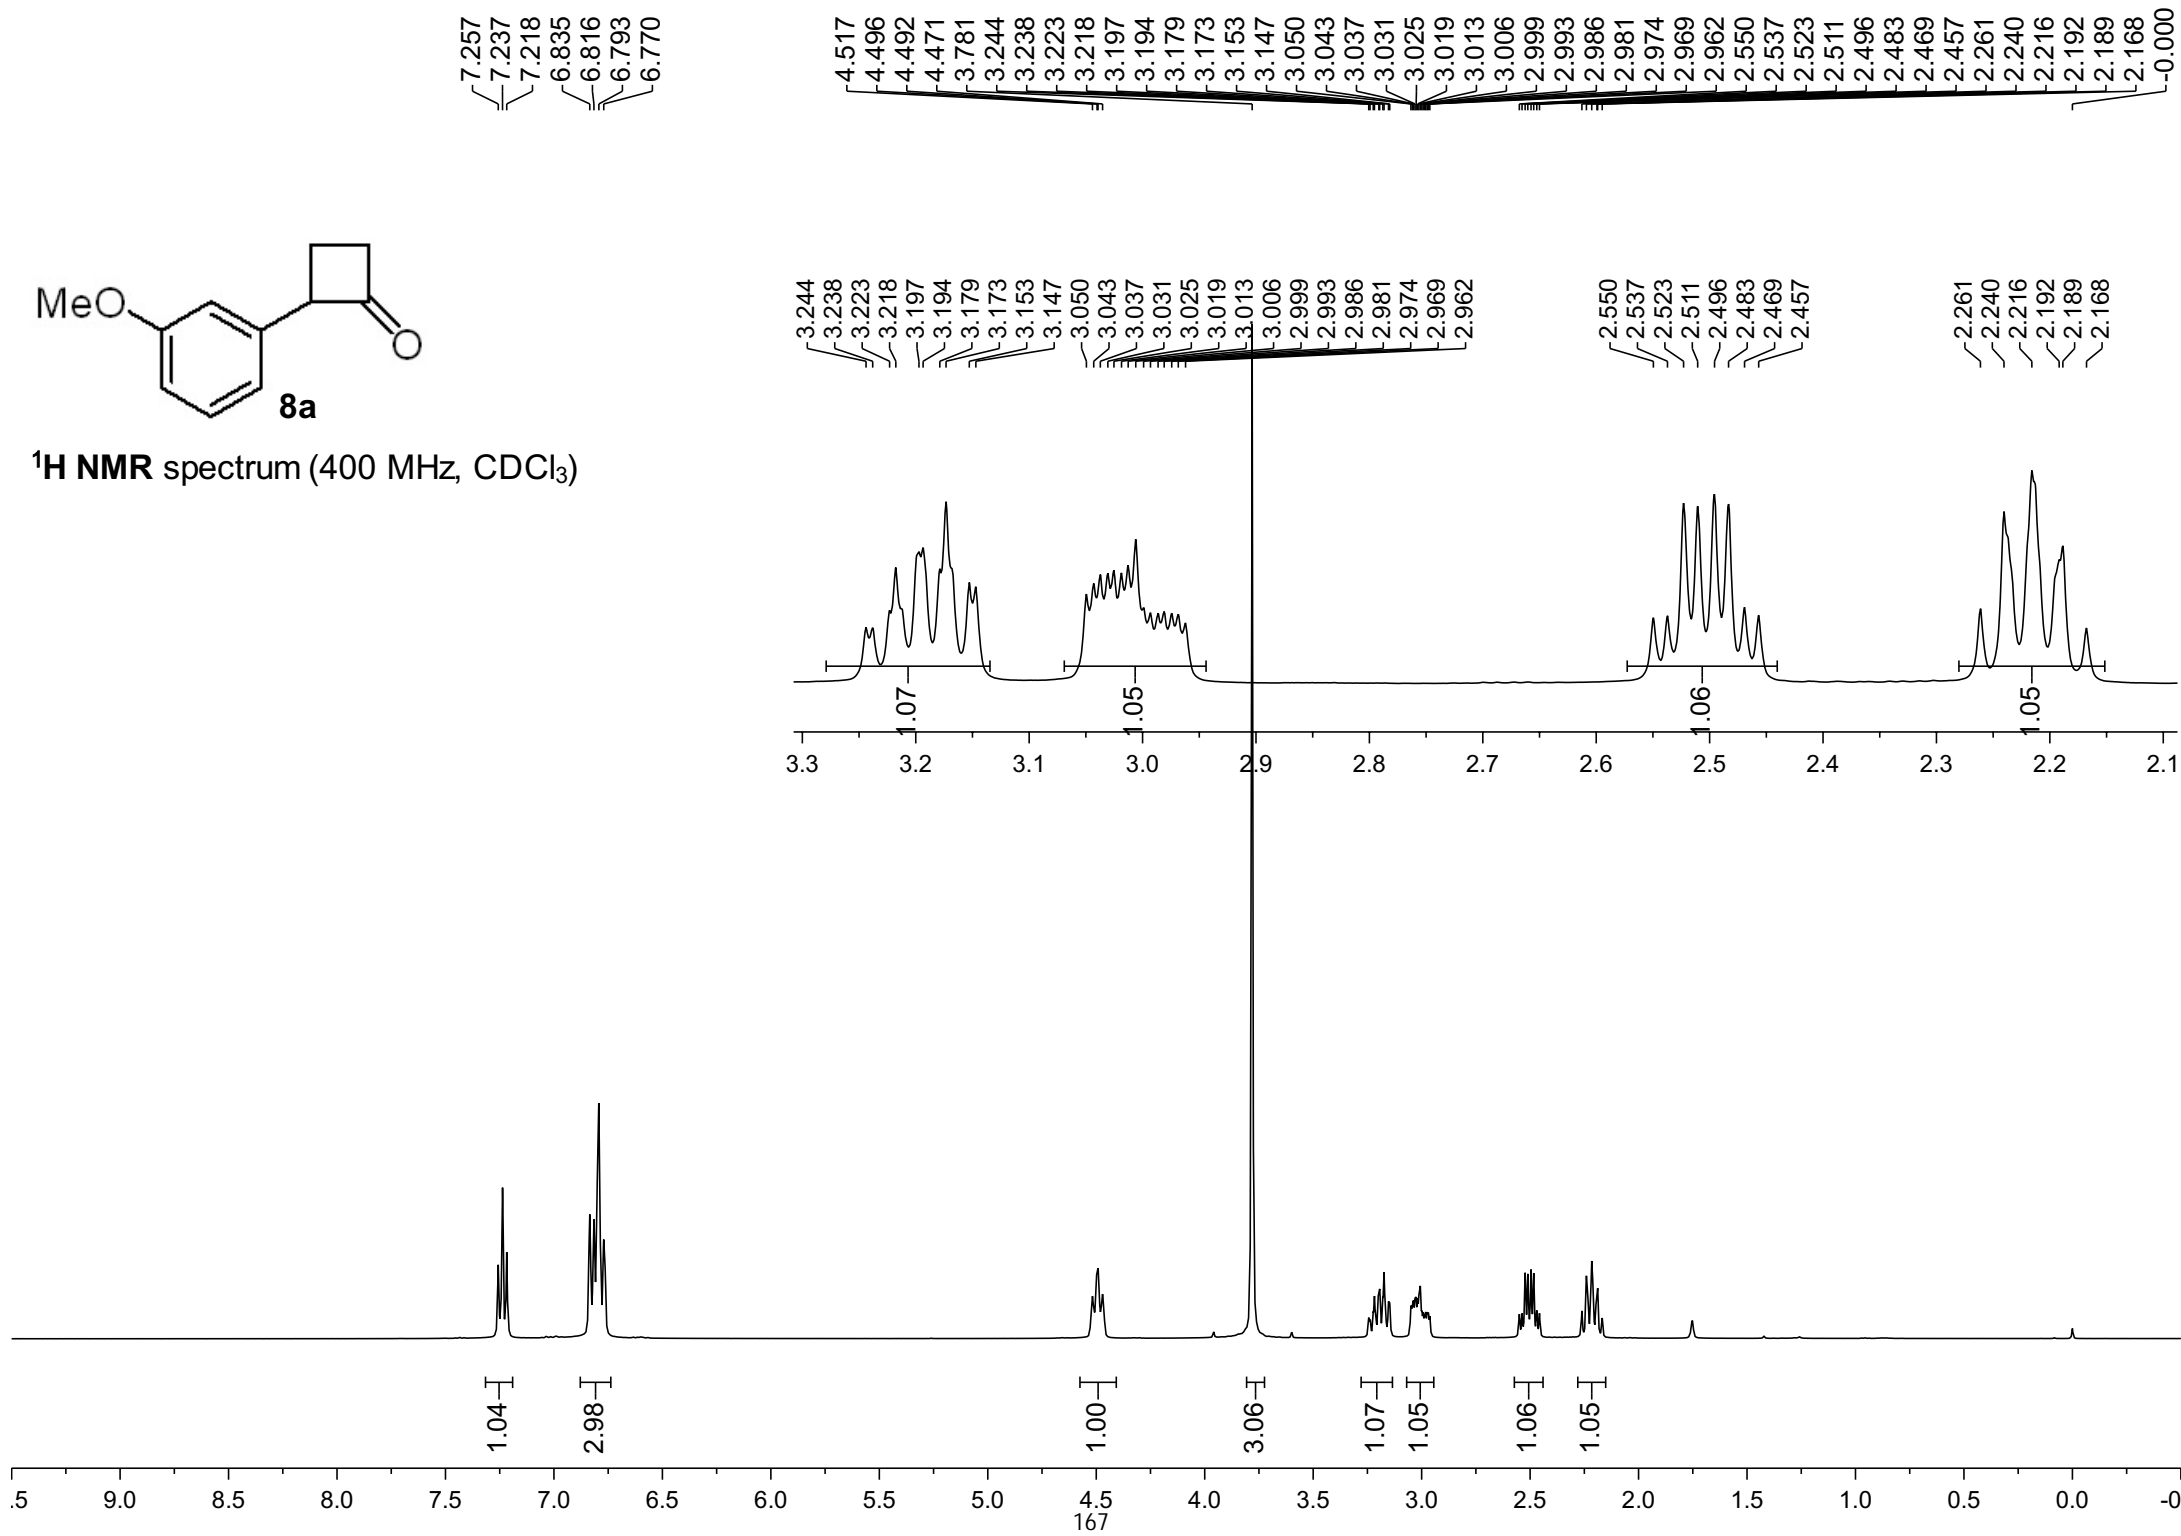

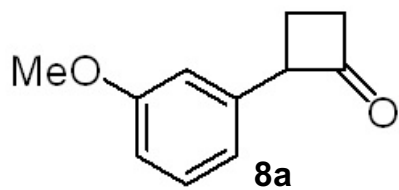

<sup>13</sup>C NMR spectrum (100 MHz, CDCl<sub>3</sub>)

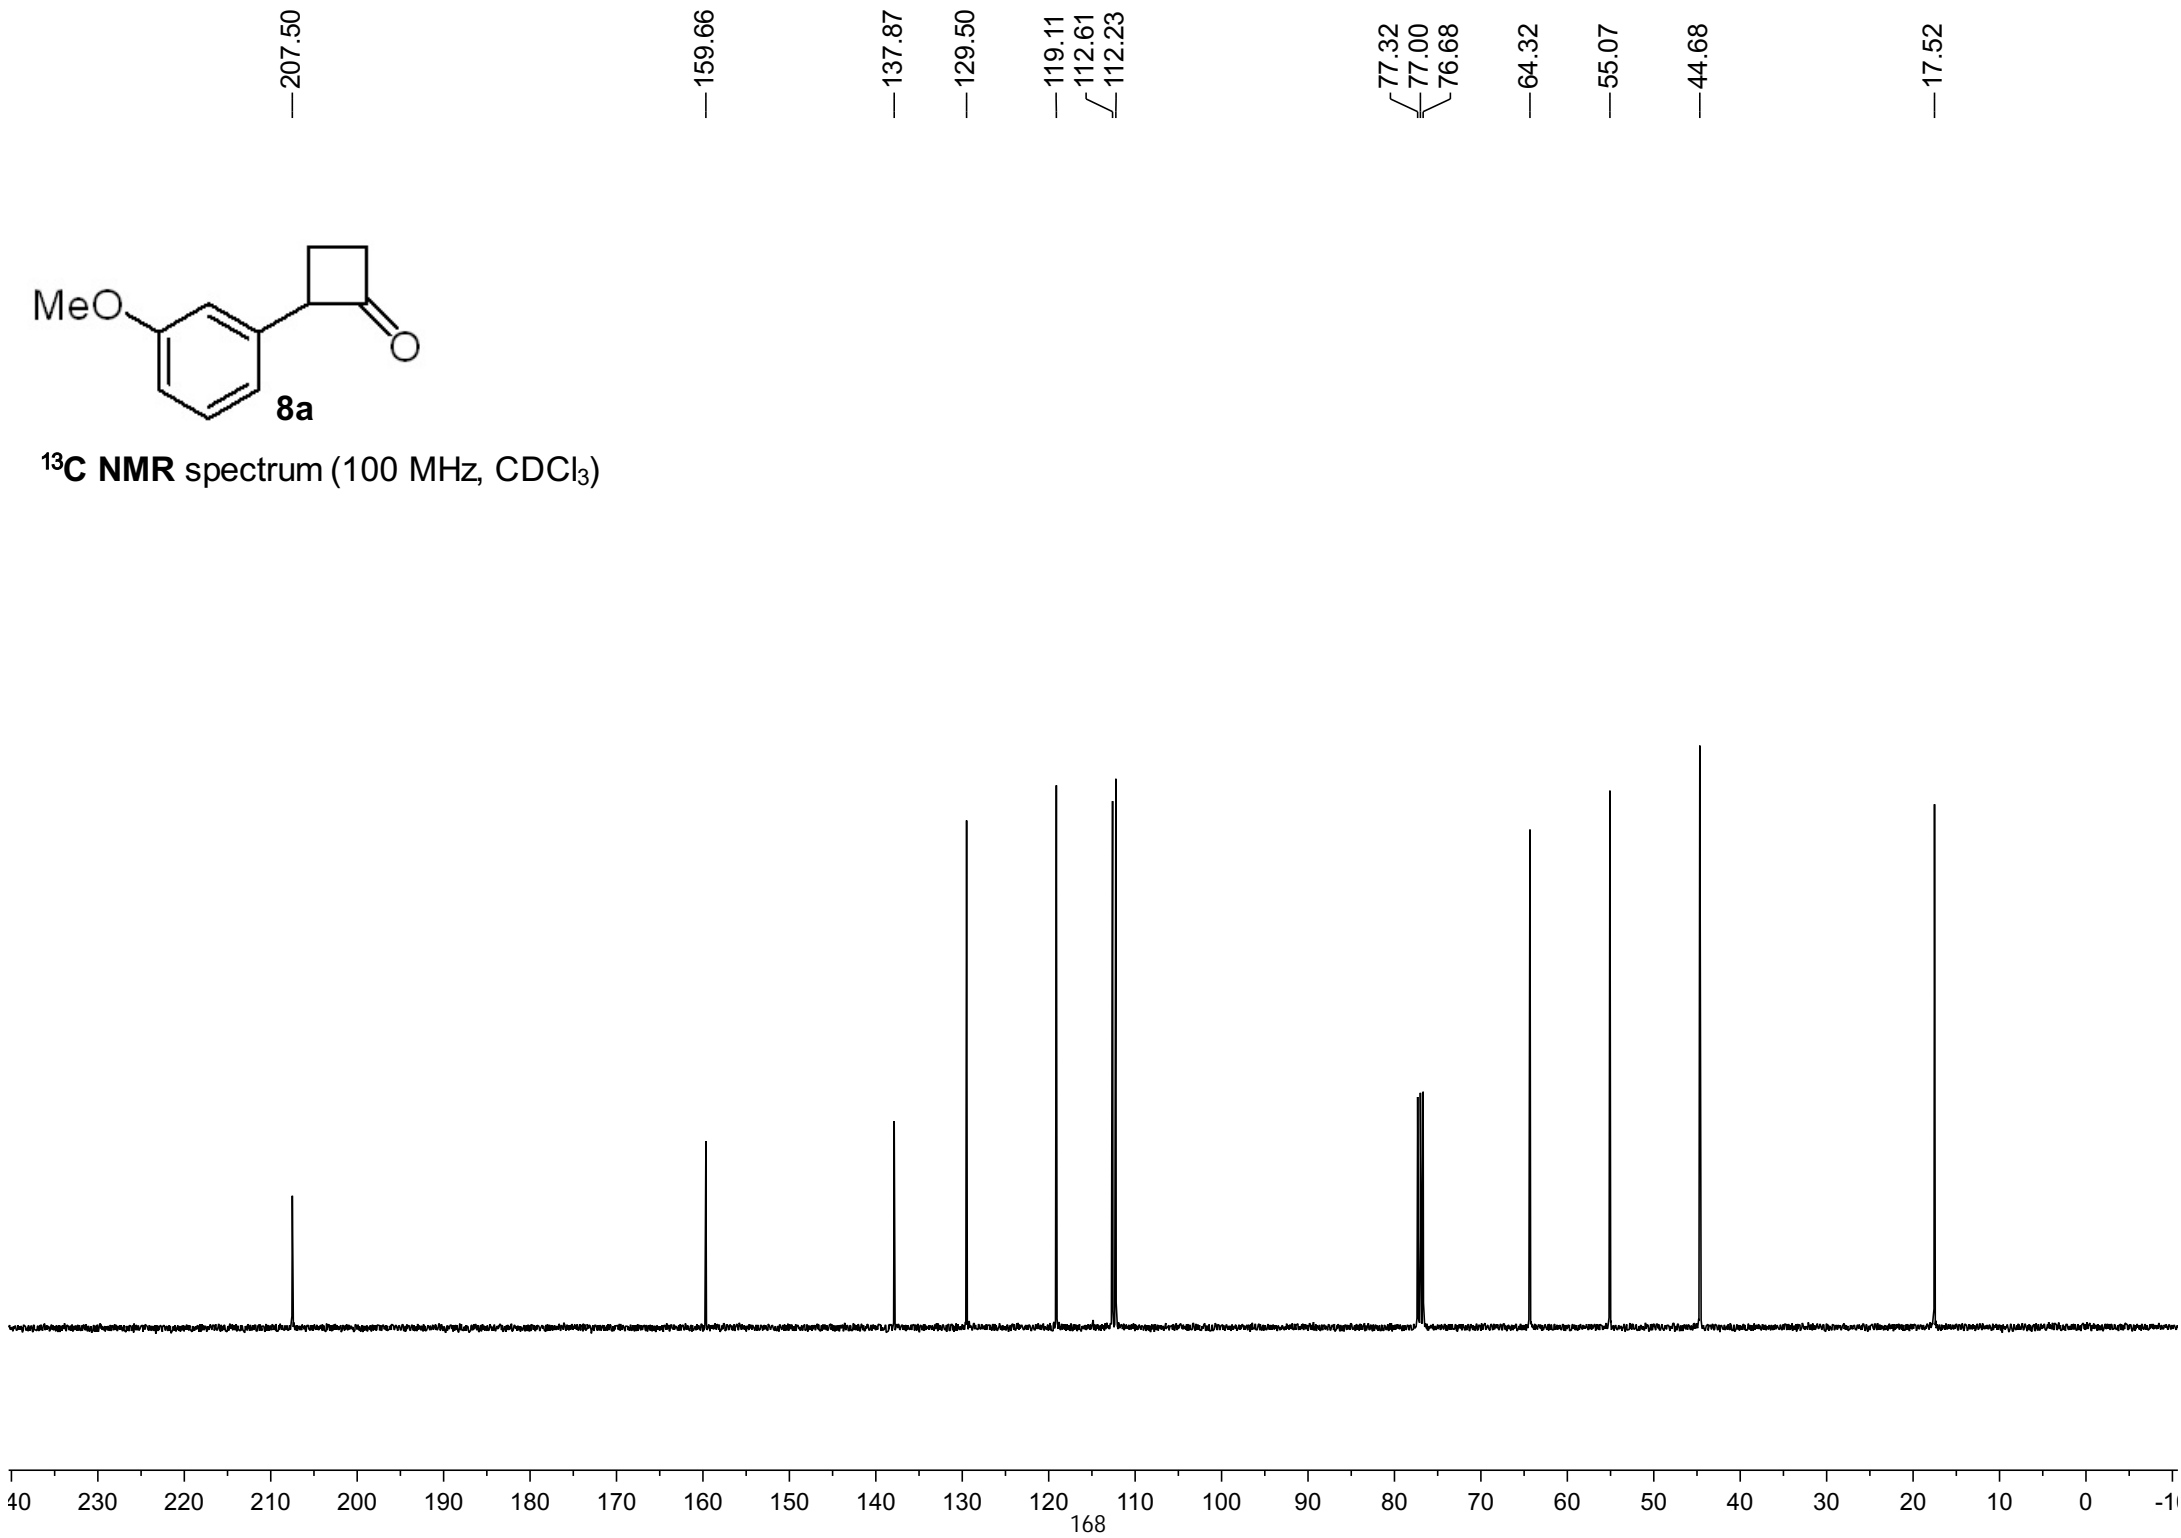

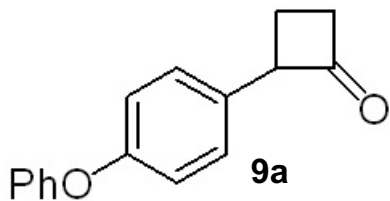

<sup>1</sup>H NMR spectrum (400 MHz, CDCl<sub>3</sub>)

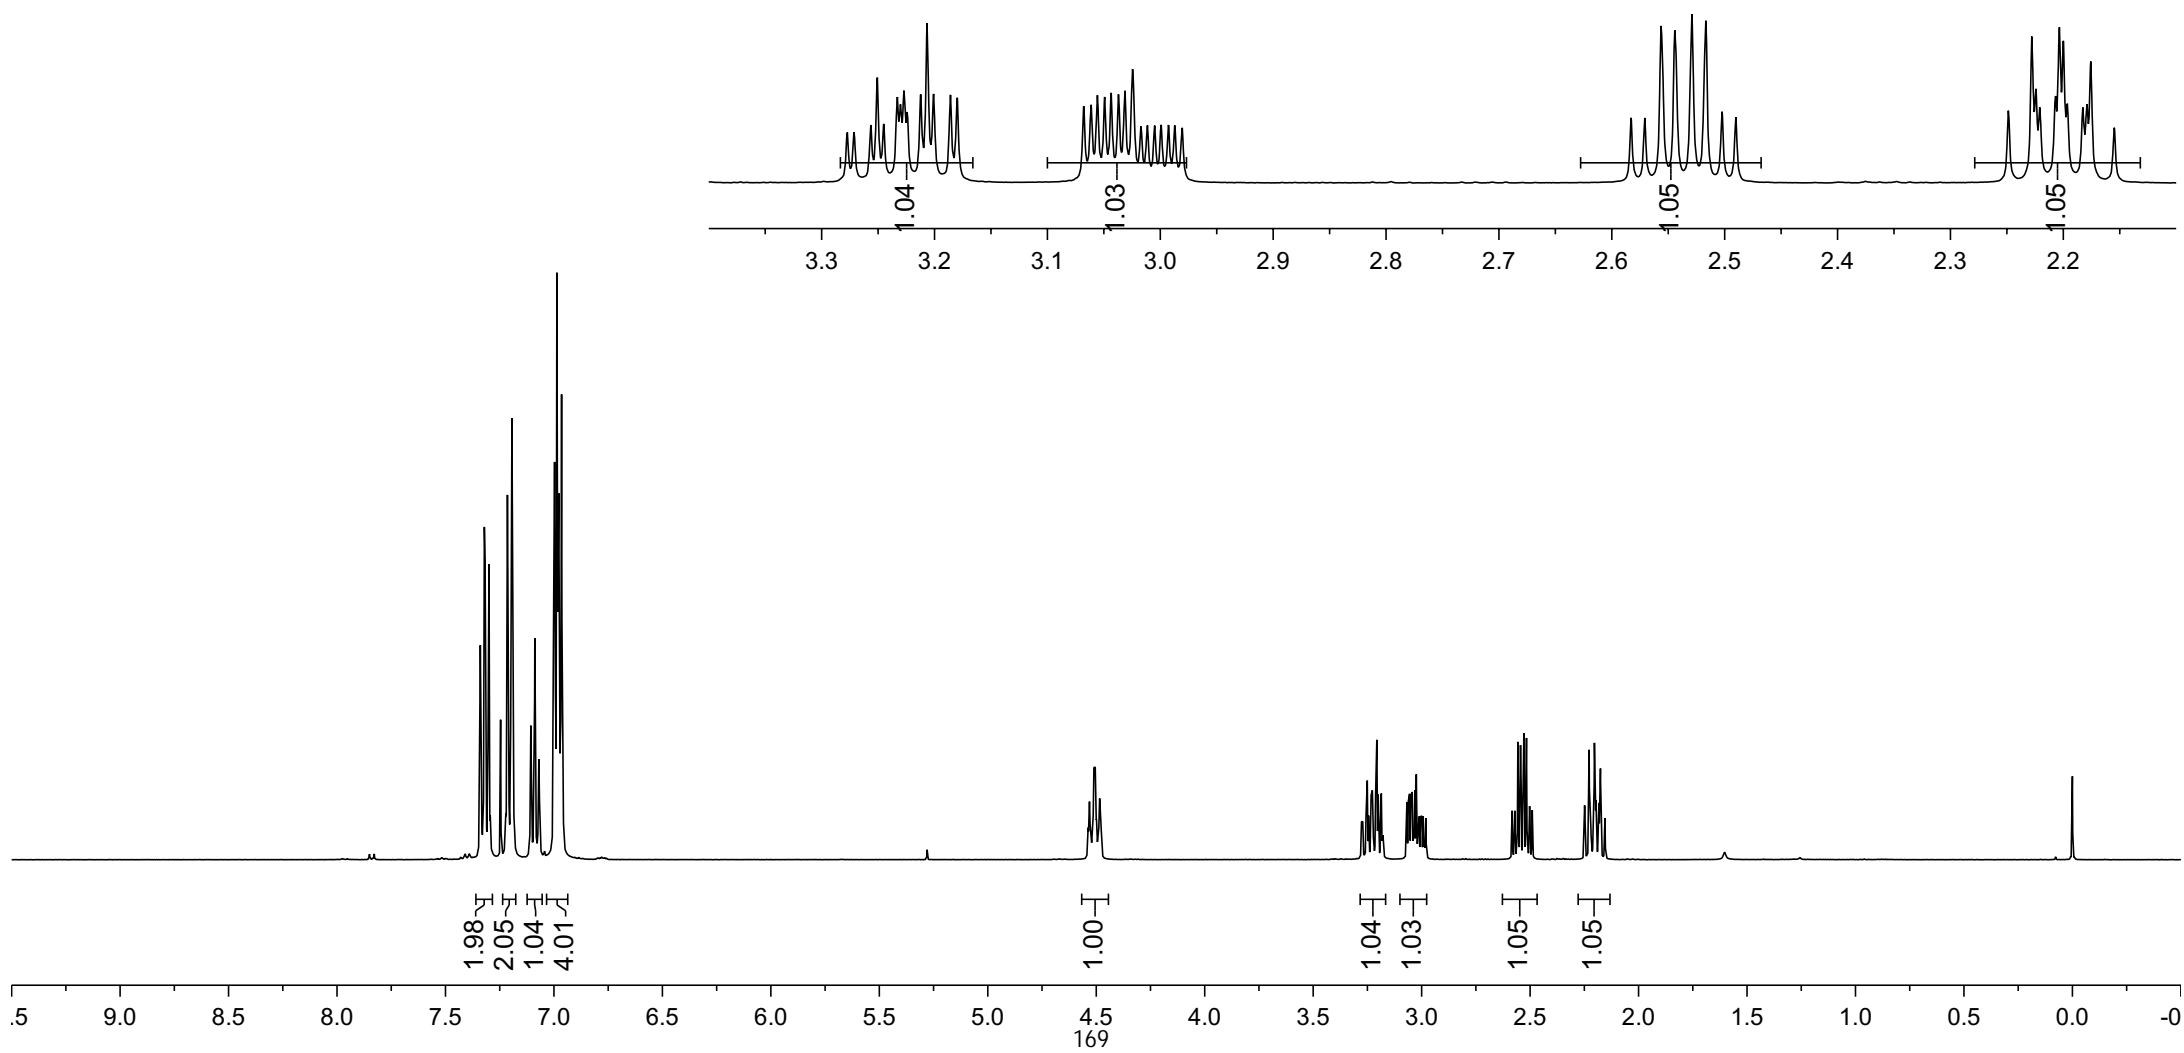

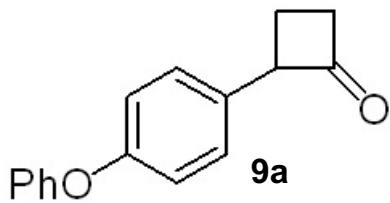

<sup>13</sup>C NMR spectrum (100 MHz, CDCl<sub>3</sub>)

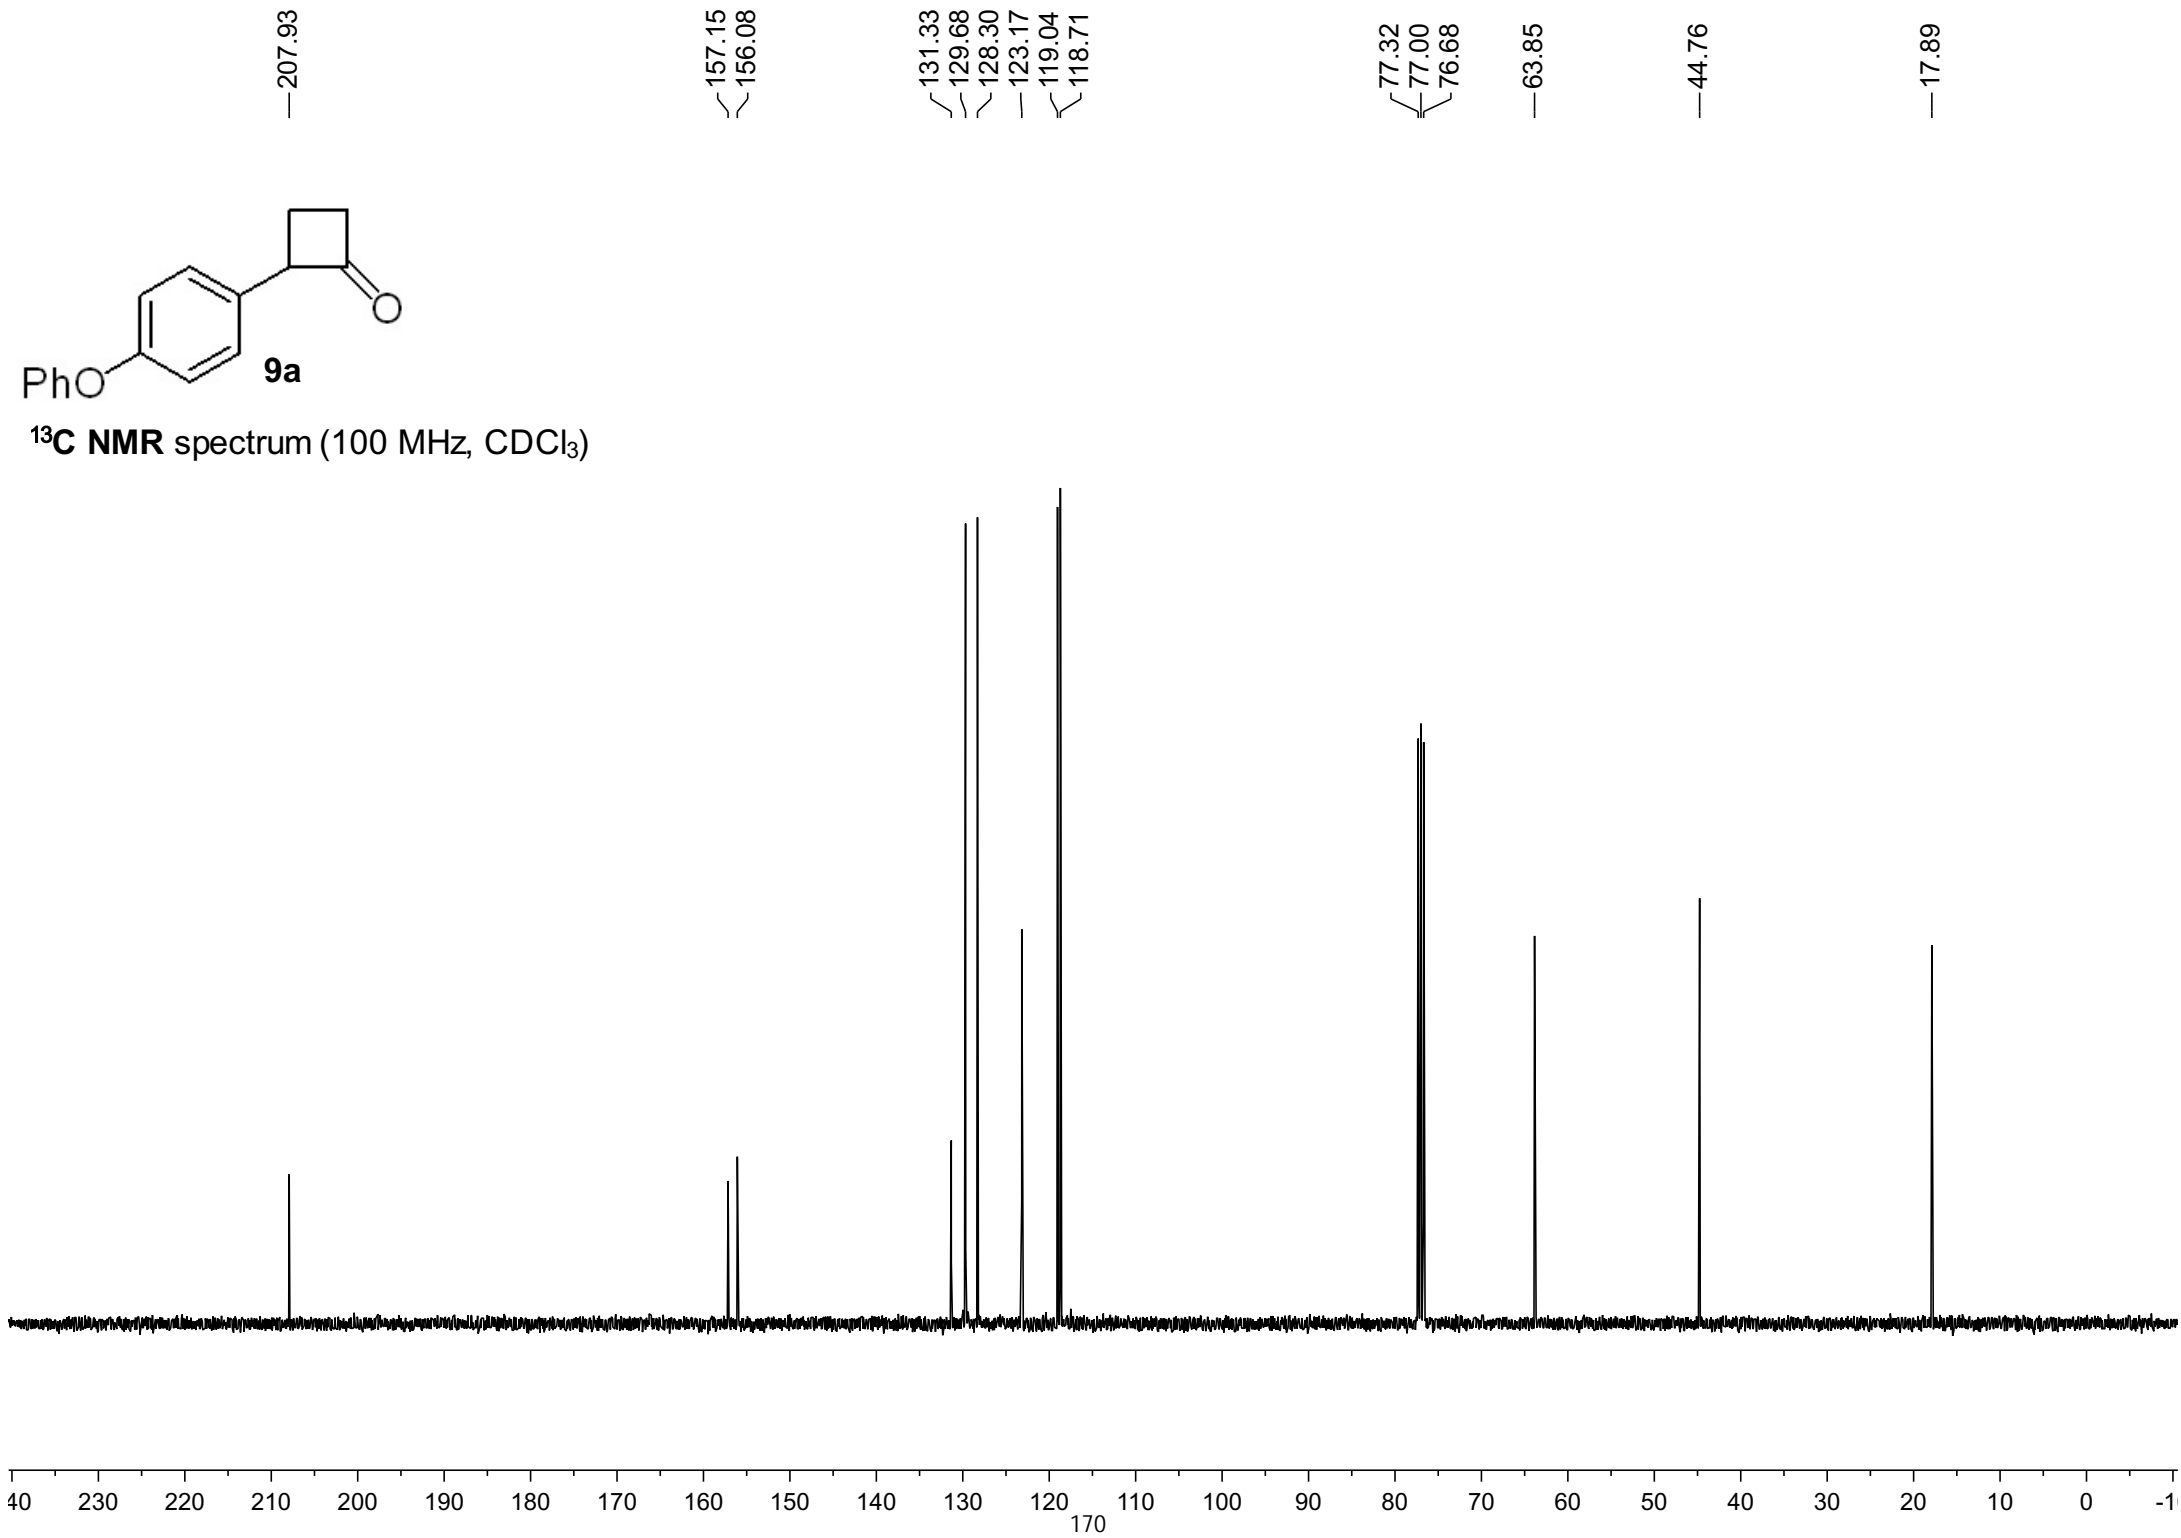

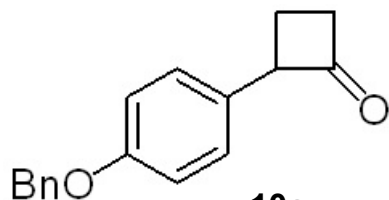

**10a**

<sup>1</sup>H NMR spectrum (400 MHz, CDCl<sub>3</sub>)

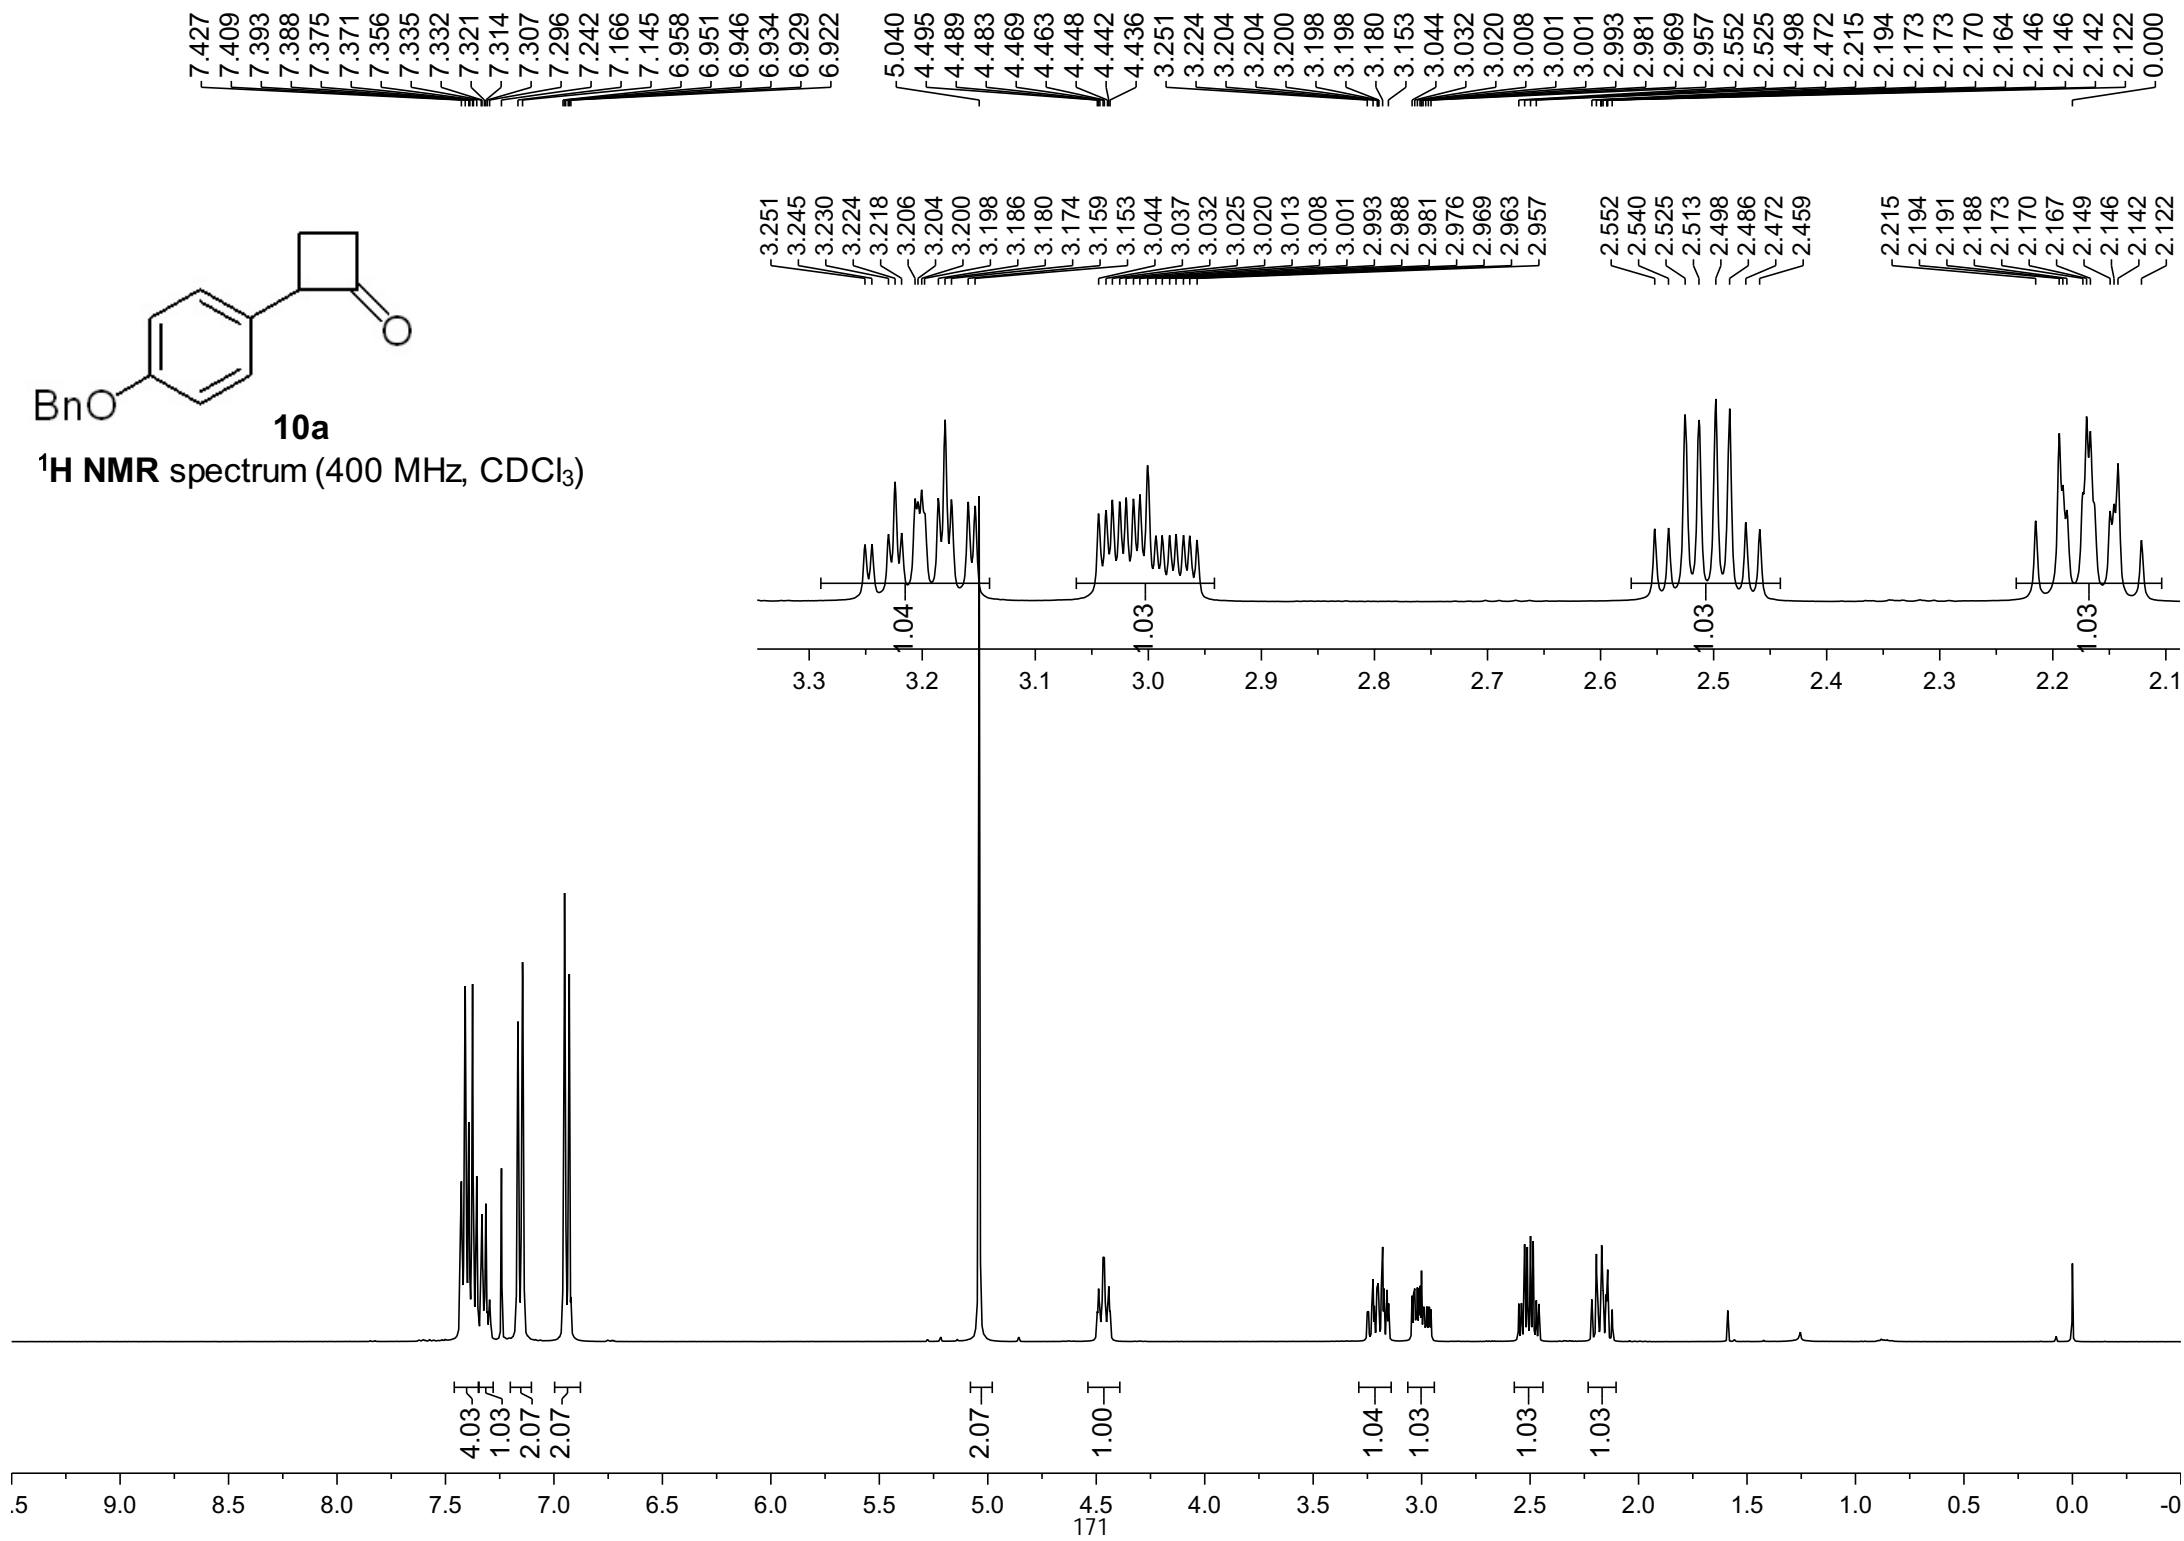





**10a**

<sup>13</sup>C NMR spectrum (100 MHz, CDCl<sub>3</sub>)

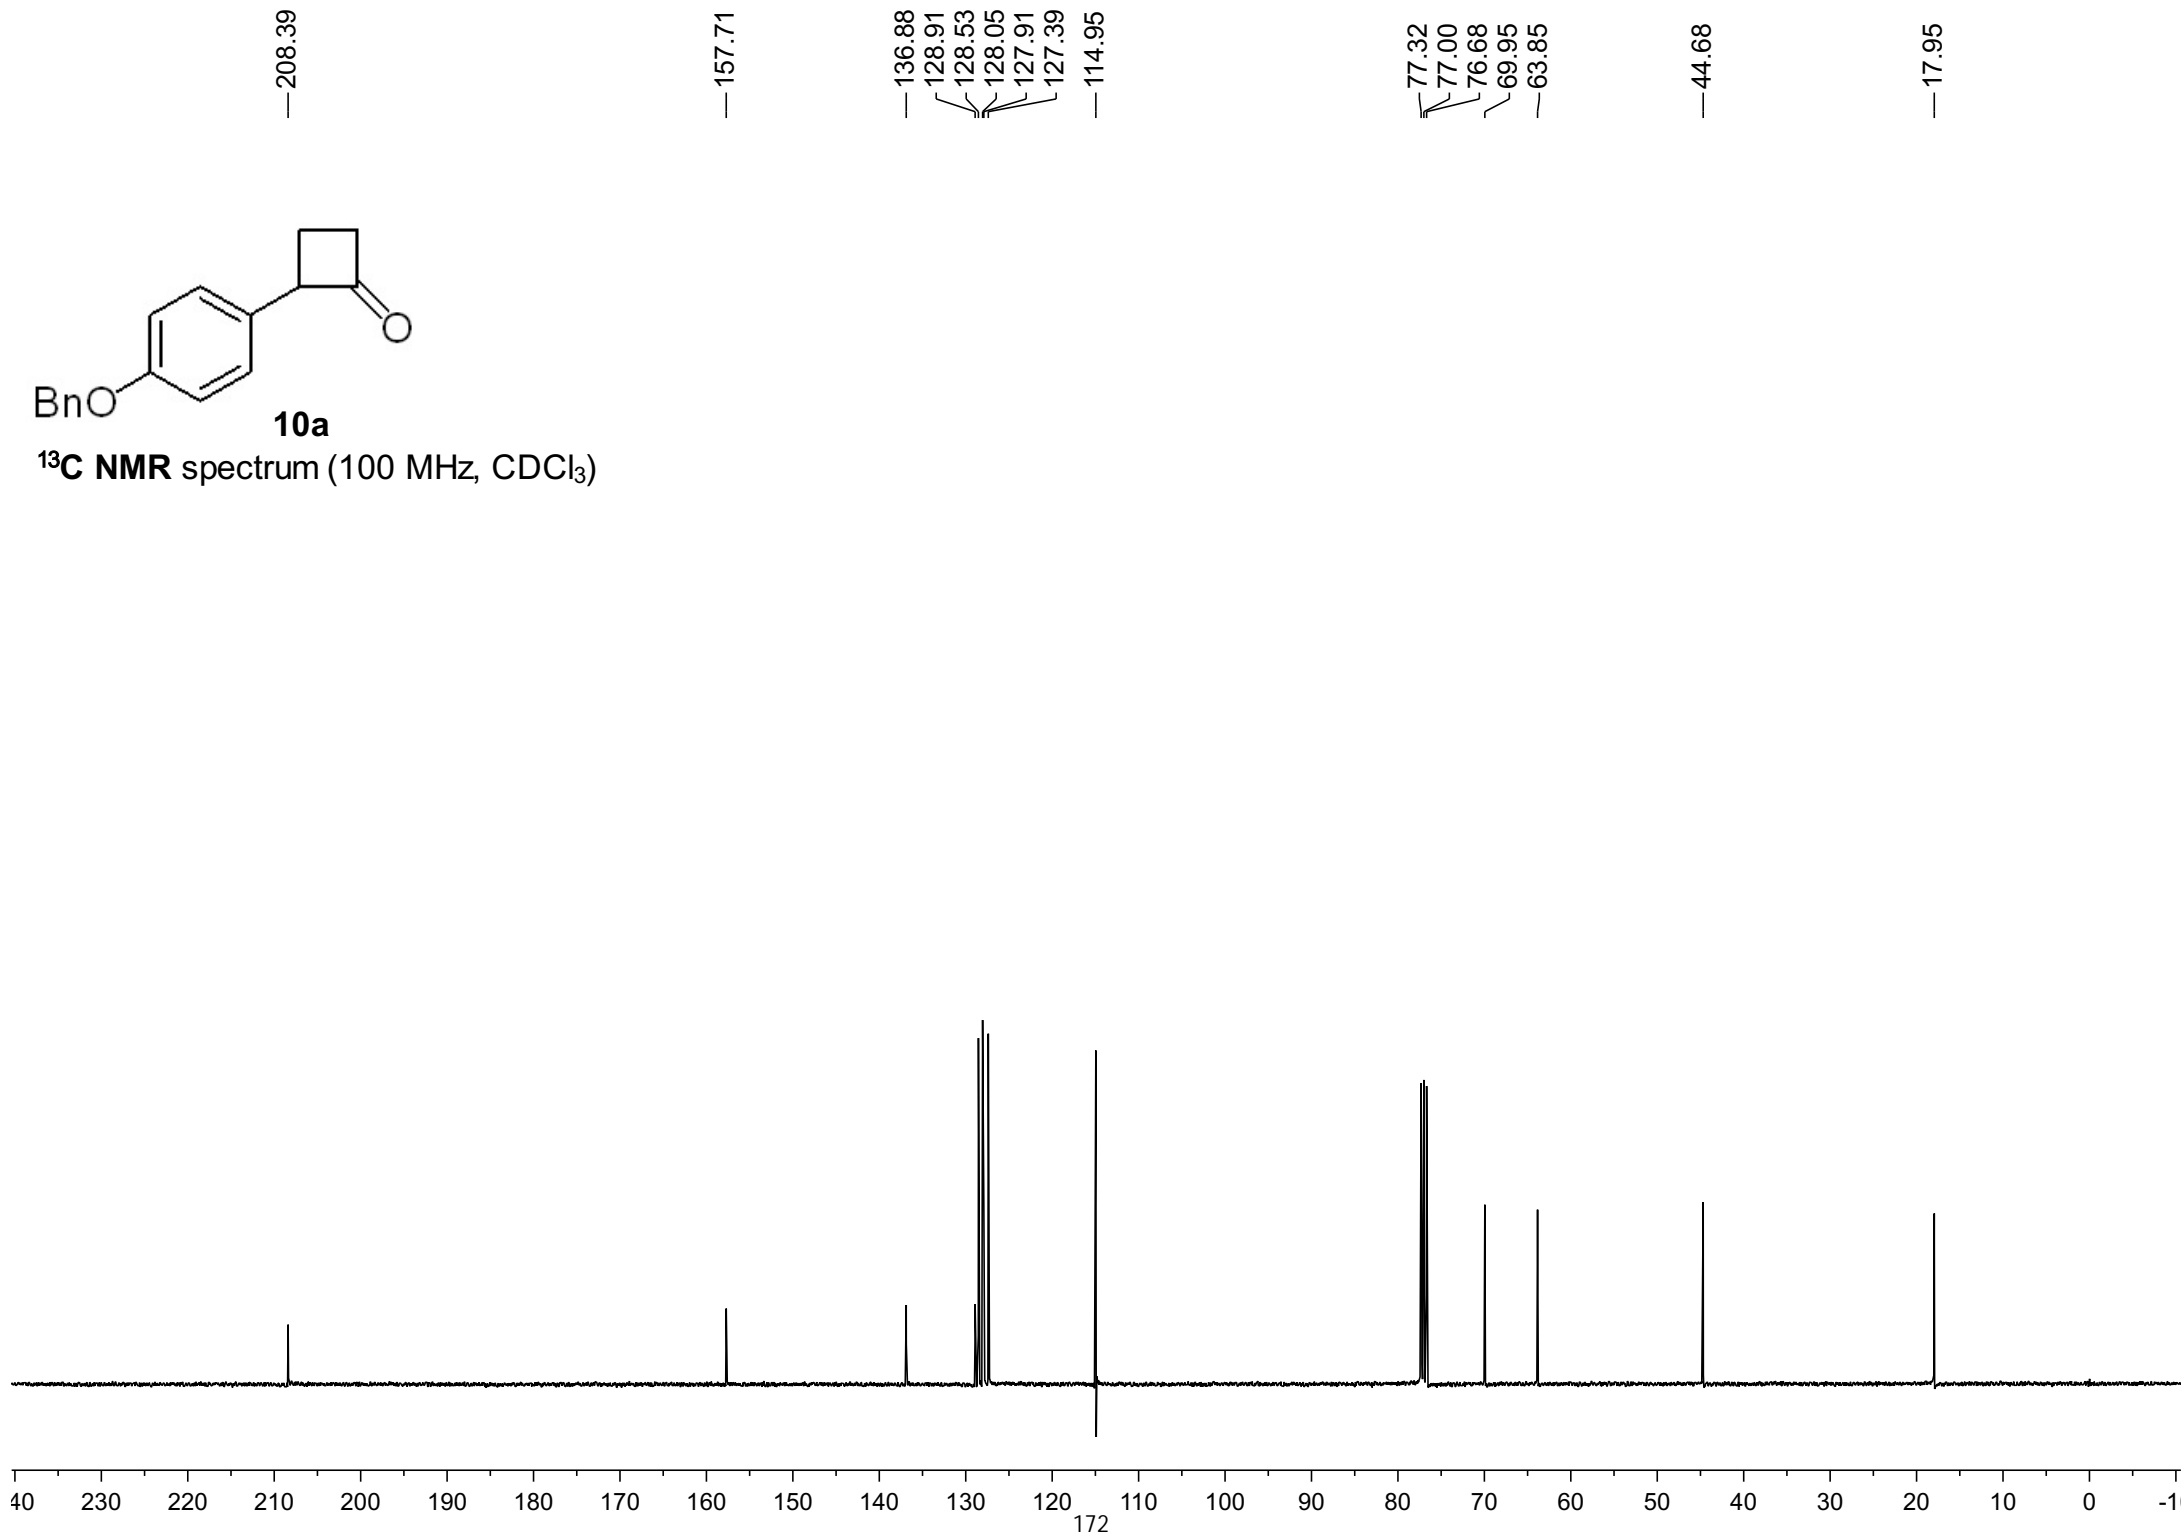

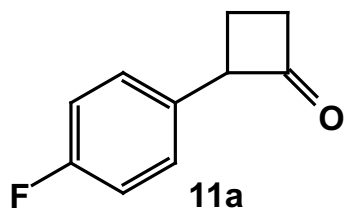

<sup>1</sup>H NMR spectrum (400 MHz, CDCl<sub>3</sub>)

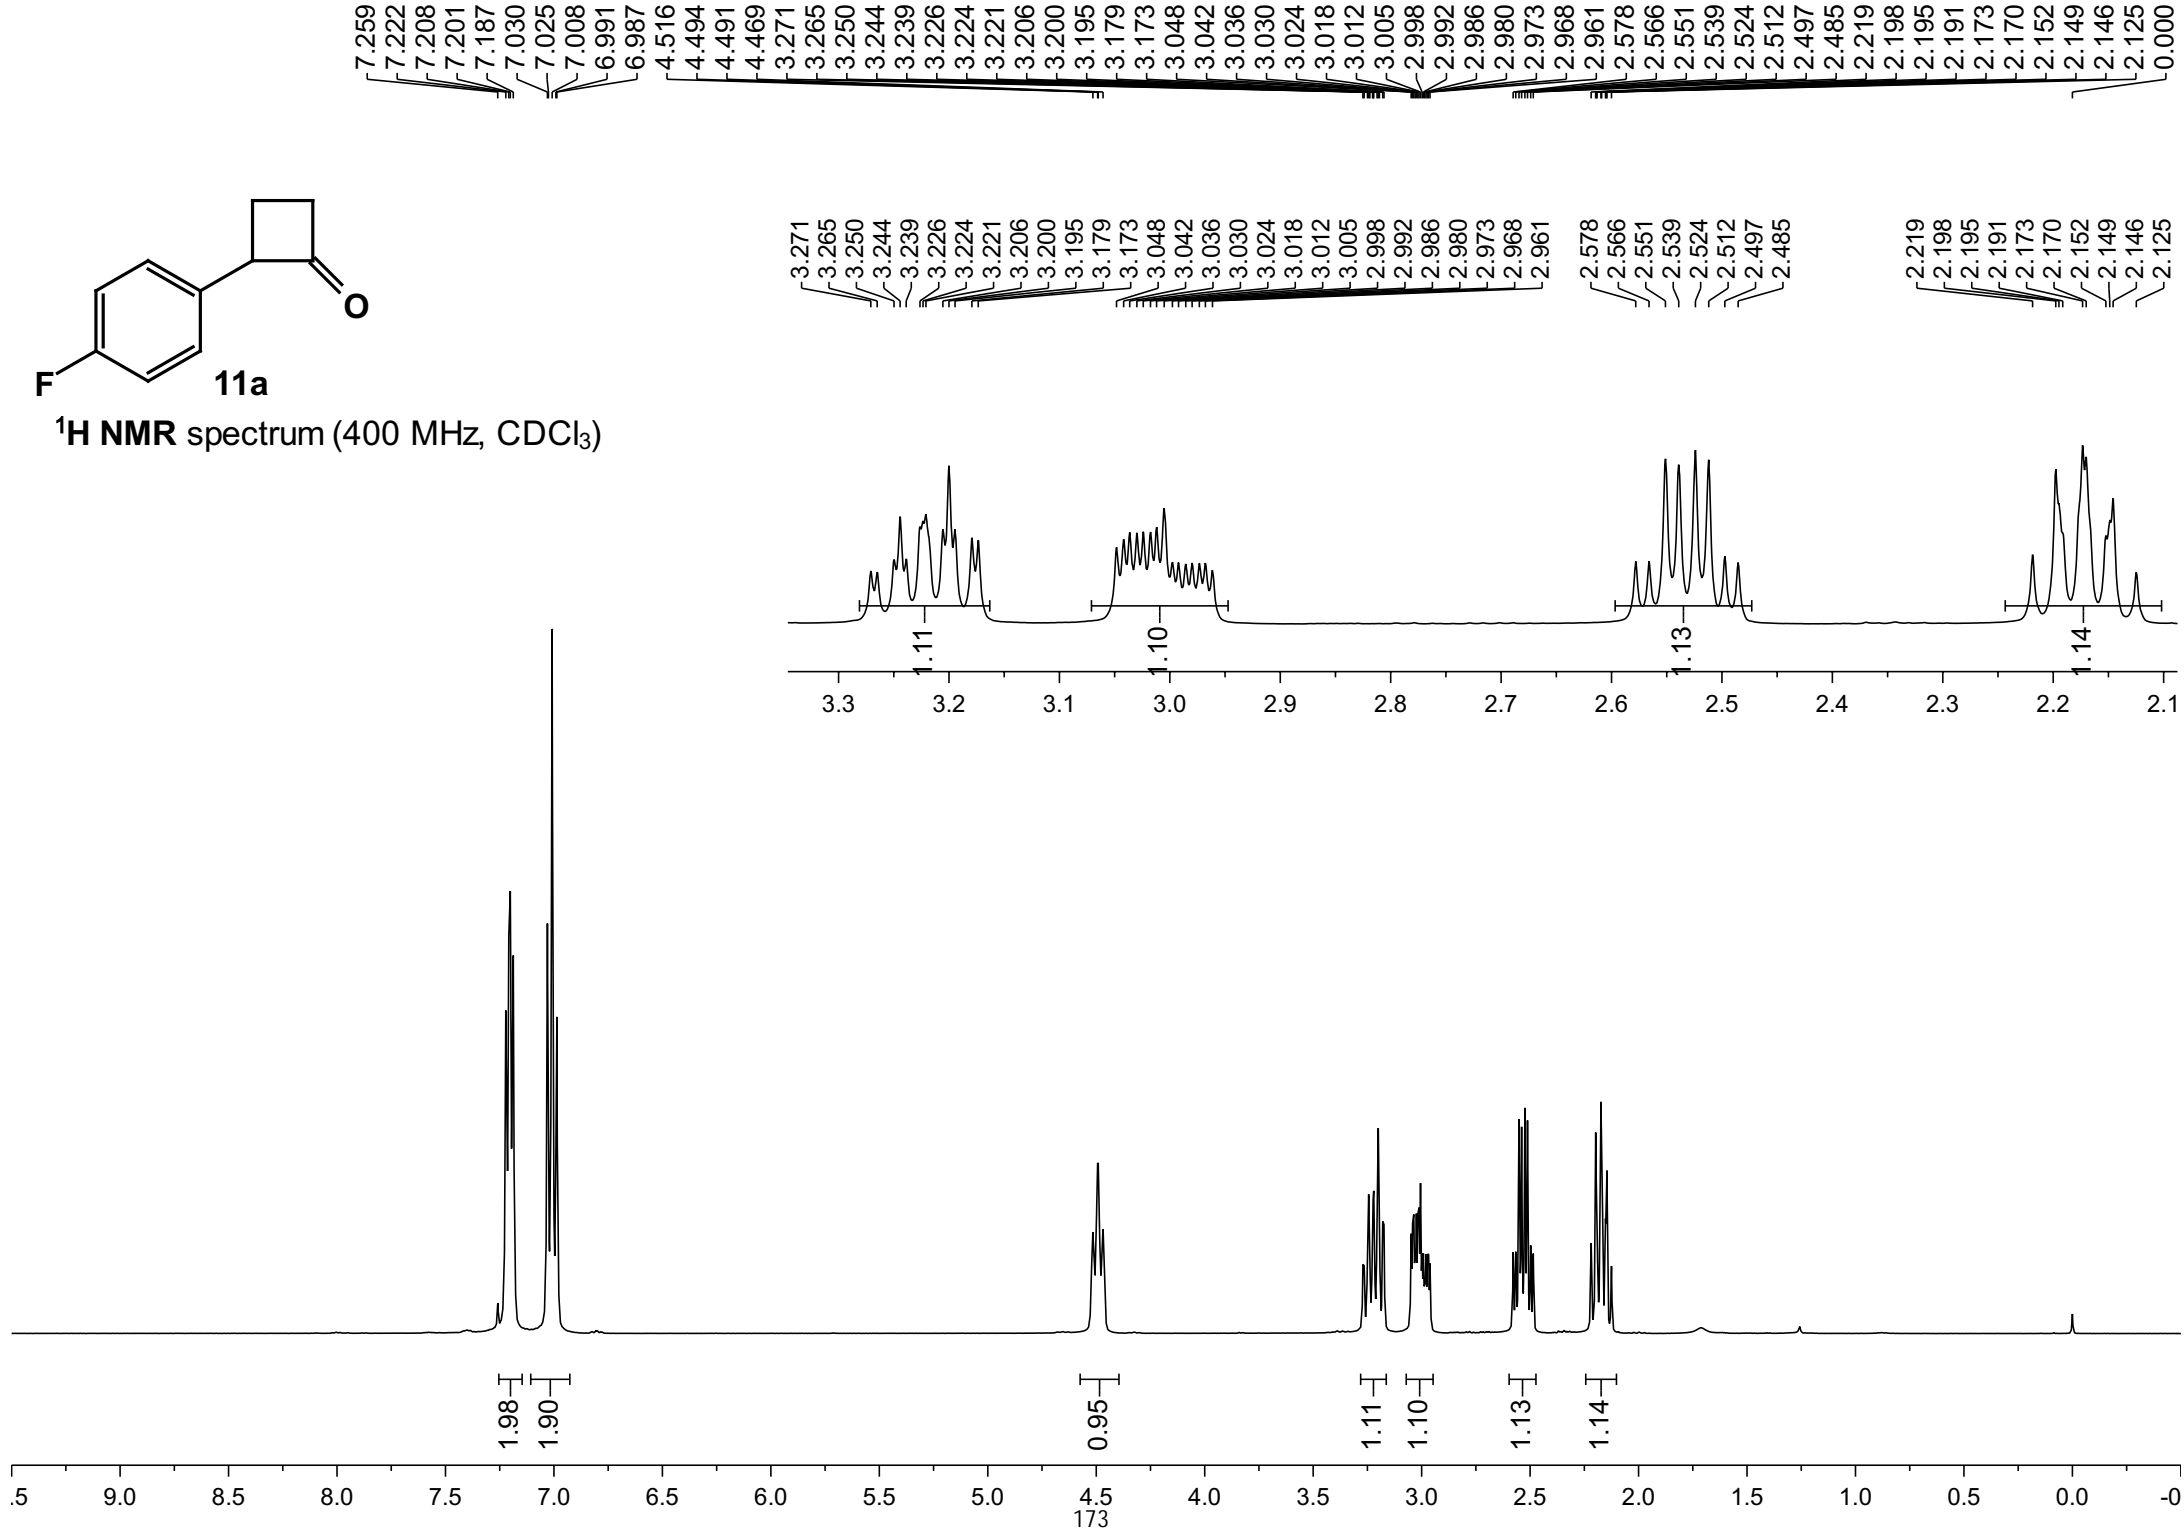

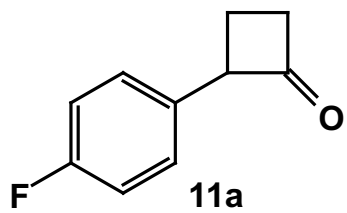

<sup>13</sup>C NMR spectrum (100 MHz, CDCl<sub>3</sub>)

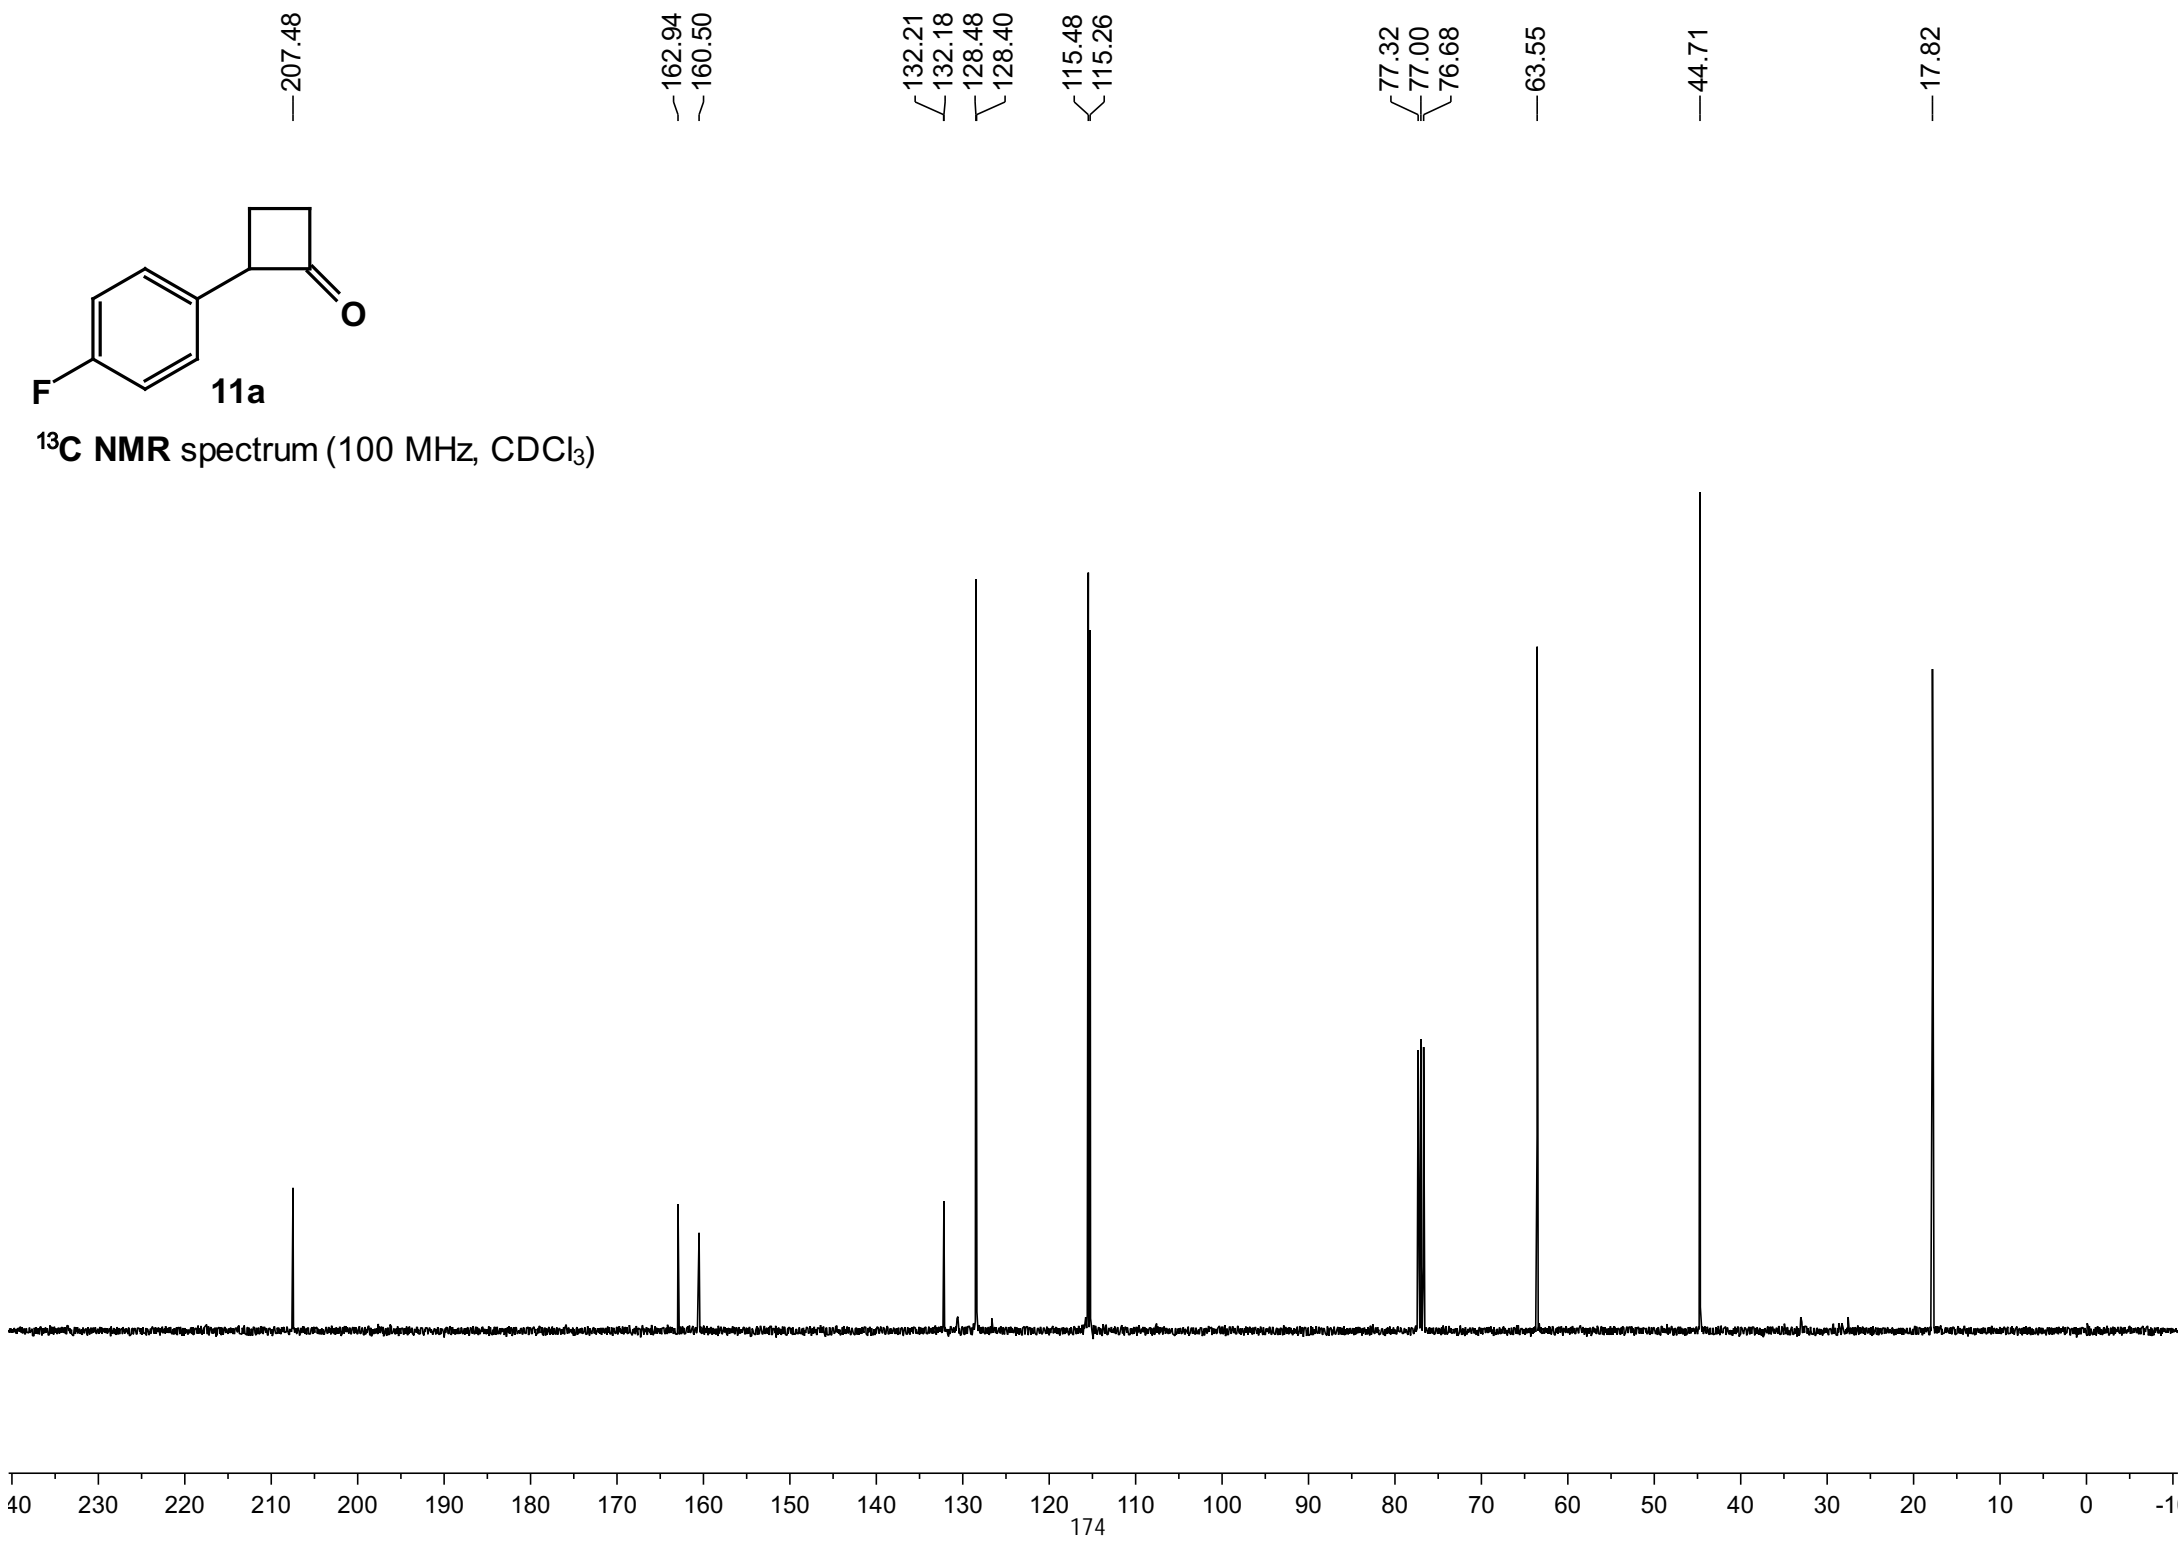

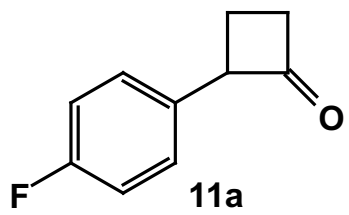

<sup>19</sup>F NMR spectrum (376 MHz, CDCl<sub>3</sub>)

---115.67

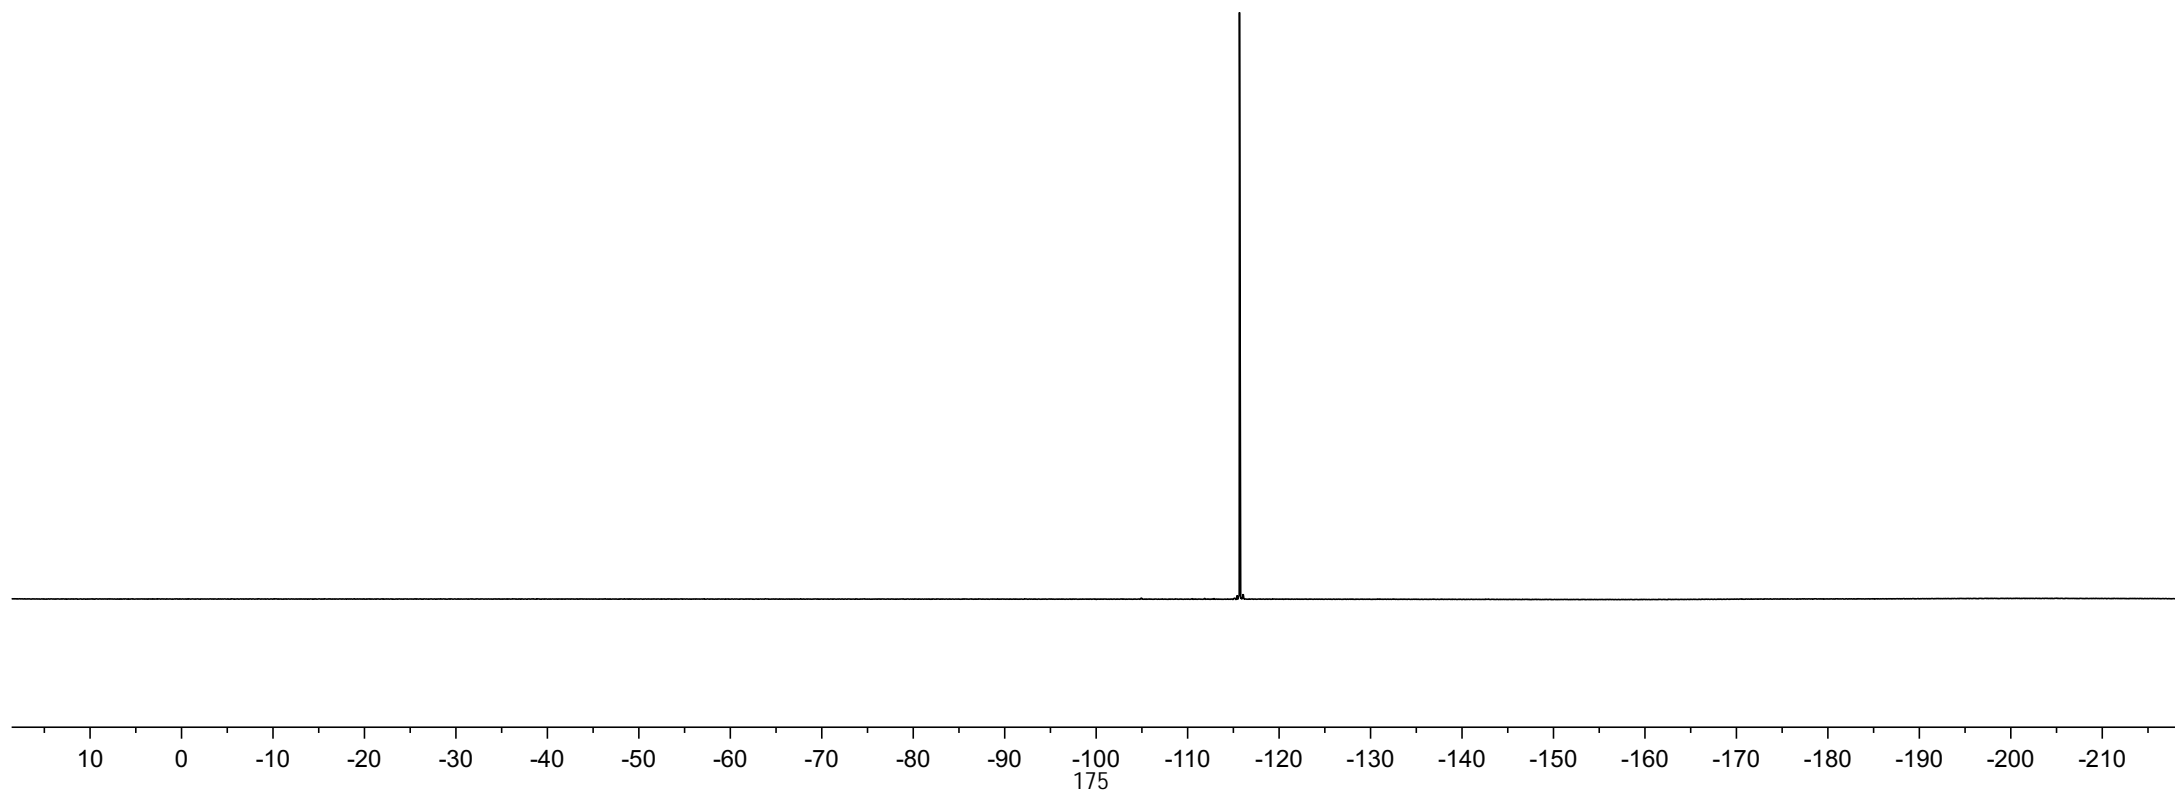

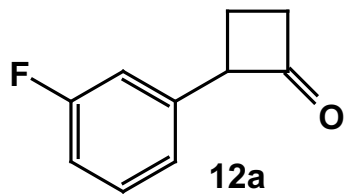

<sup>1</sup>H NMR spectrum (400 MHz, CDCl<sub>3</sub>)

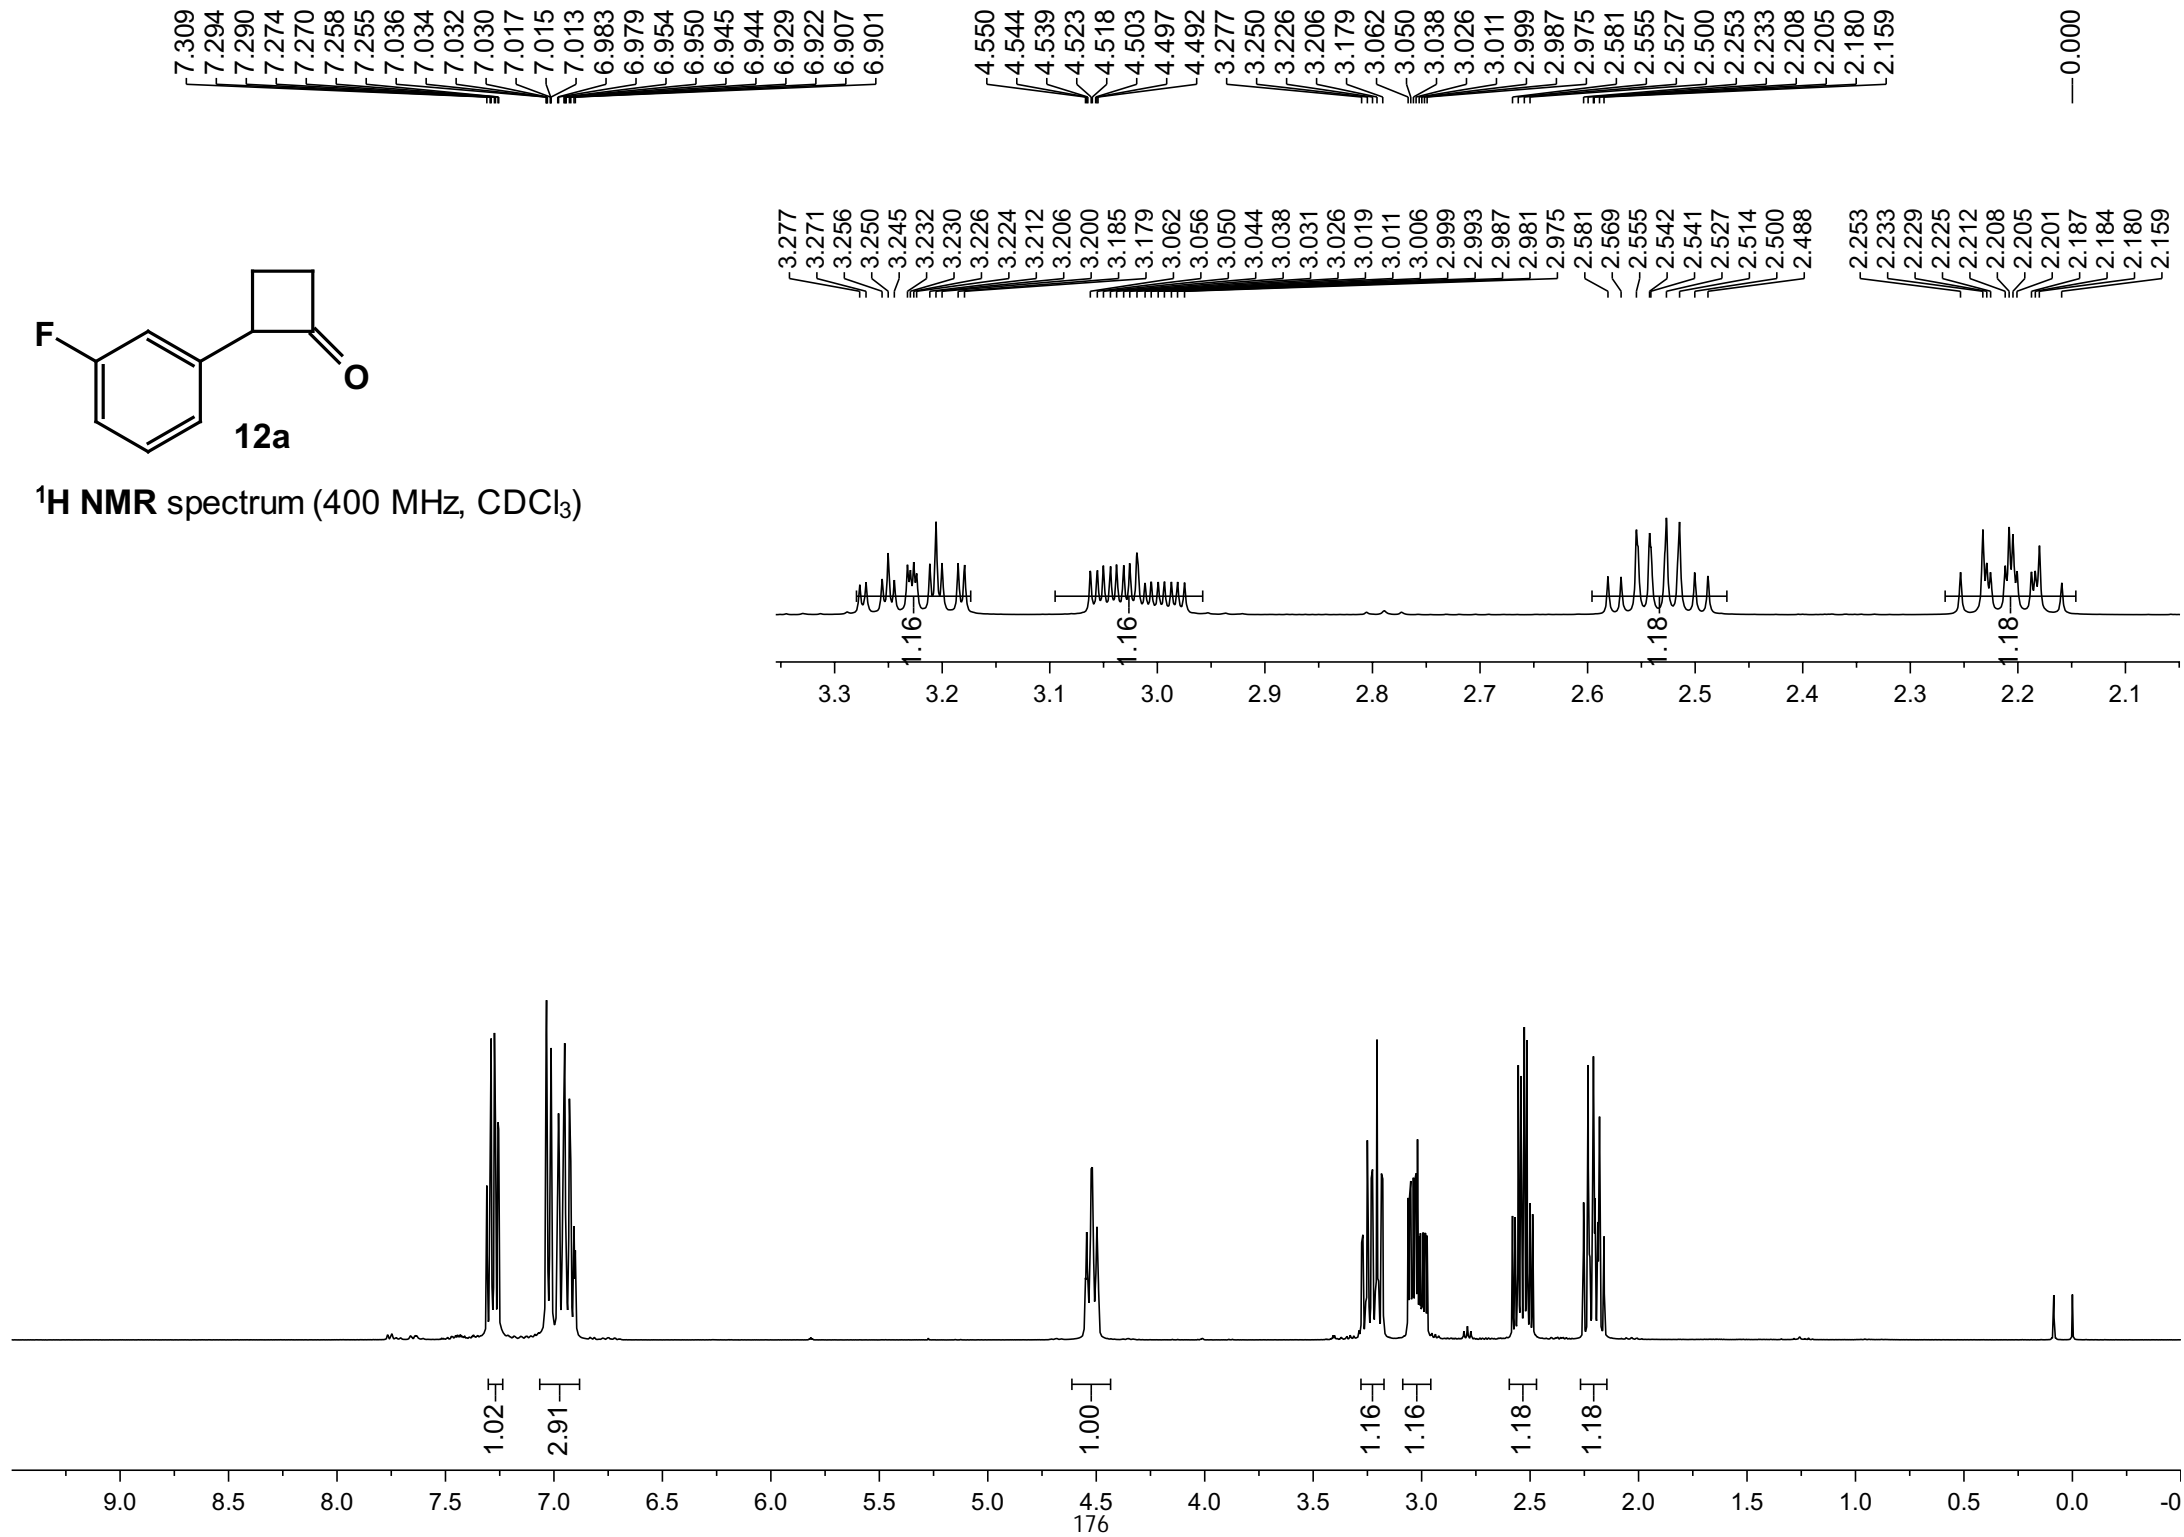

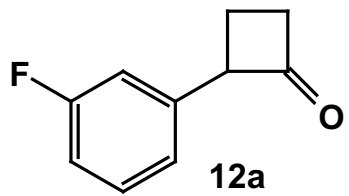

<sup>13</sup>C NMR spectrum (100 MHz, CDCl<sub>3</sub>)

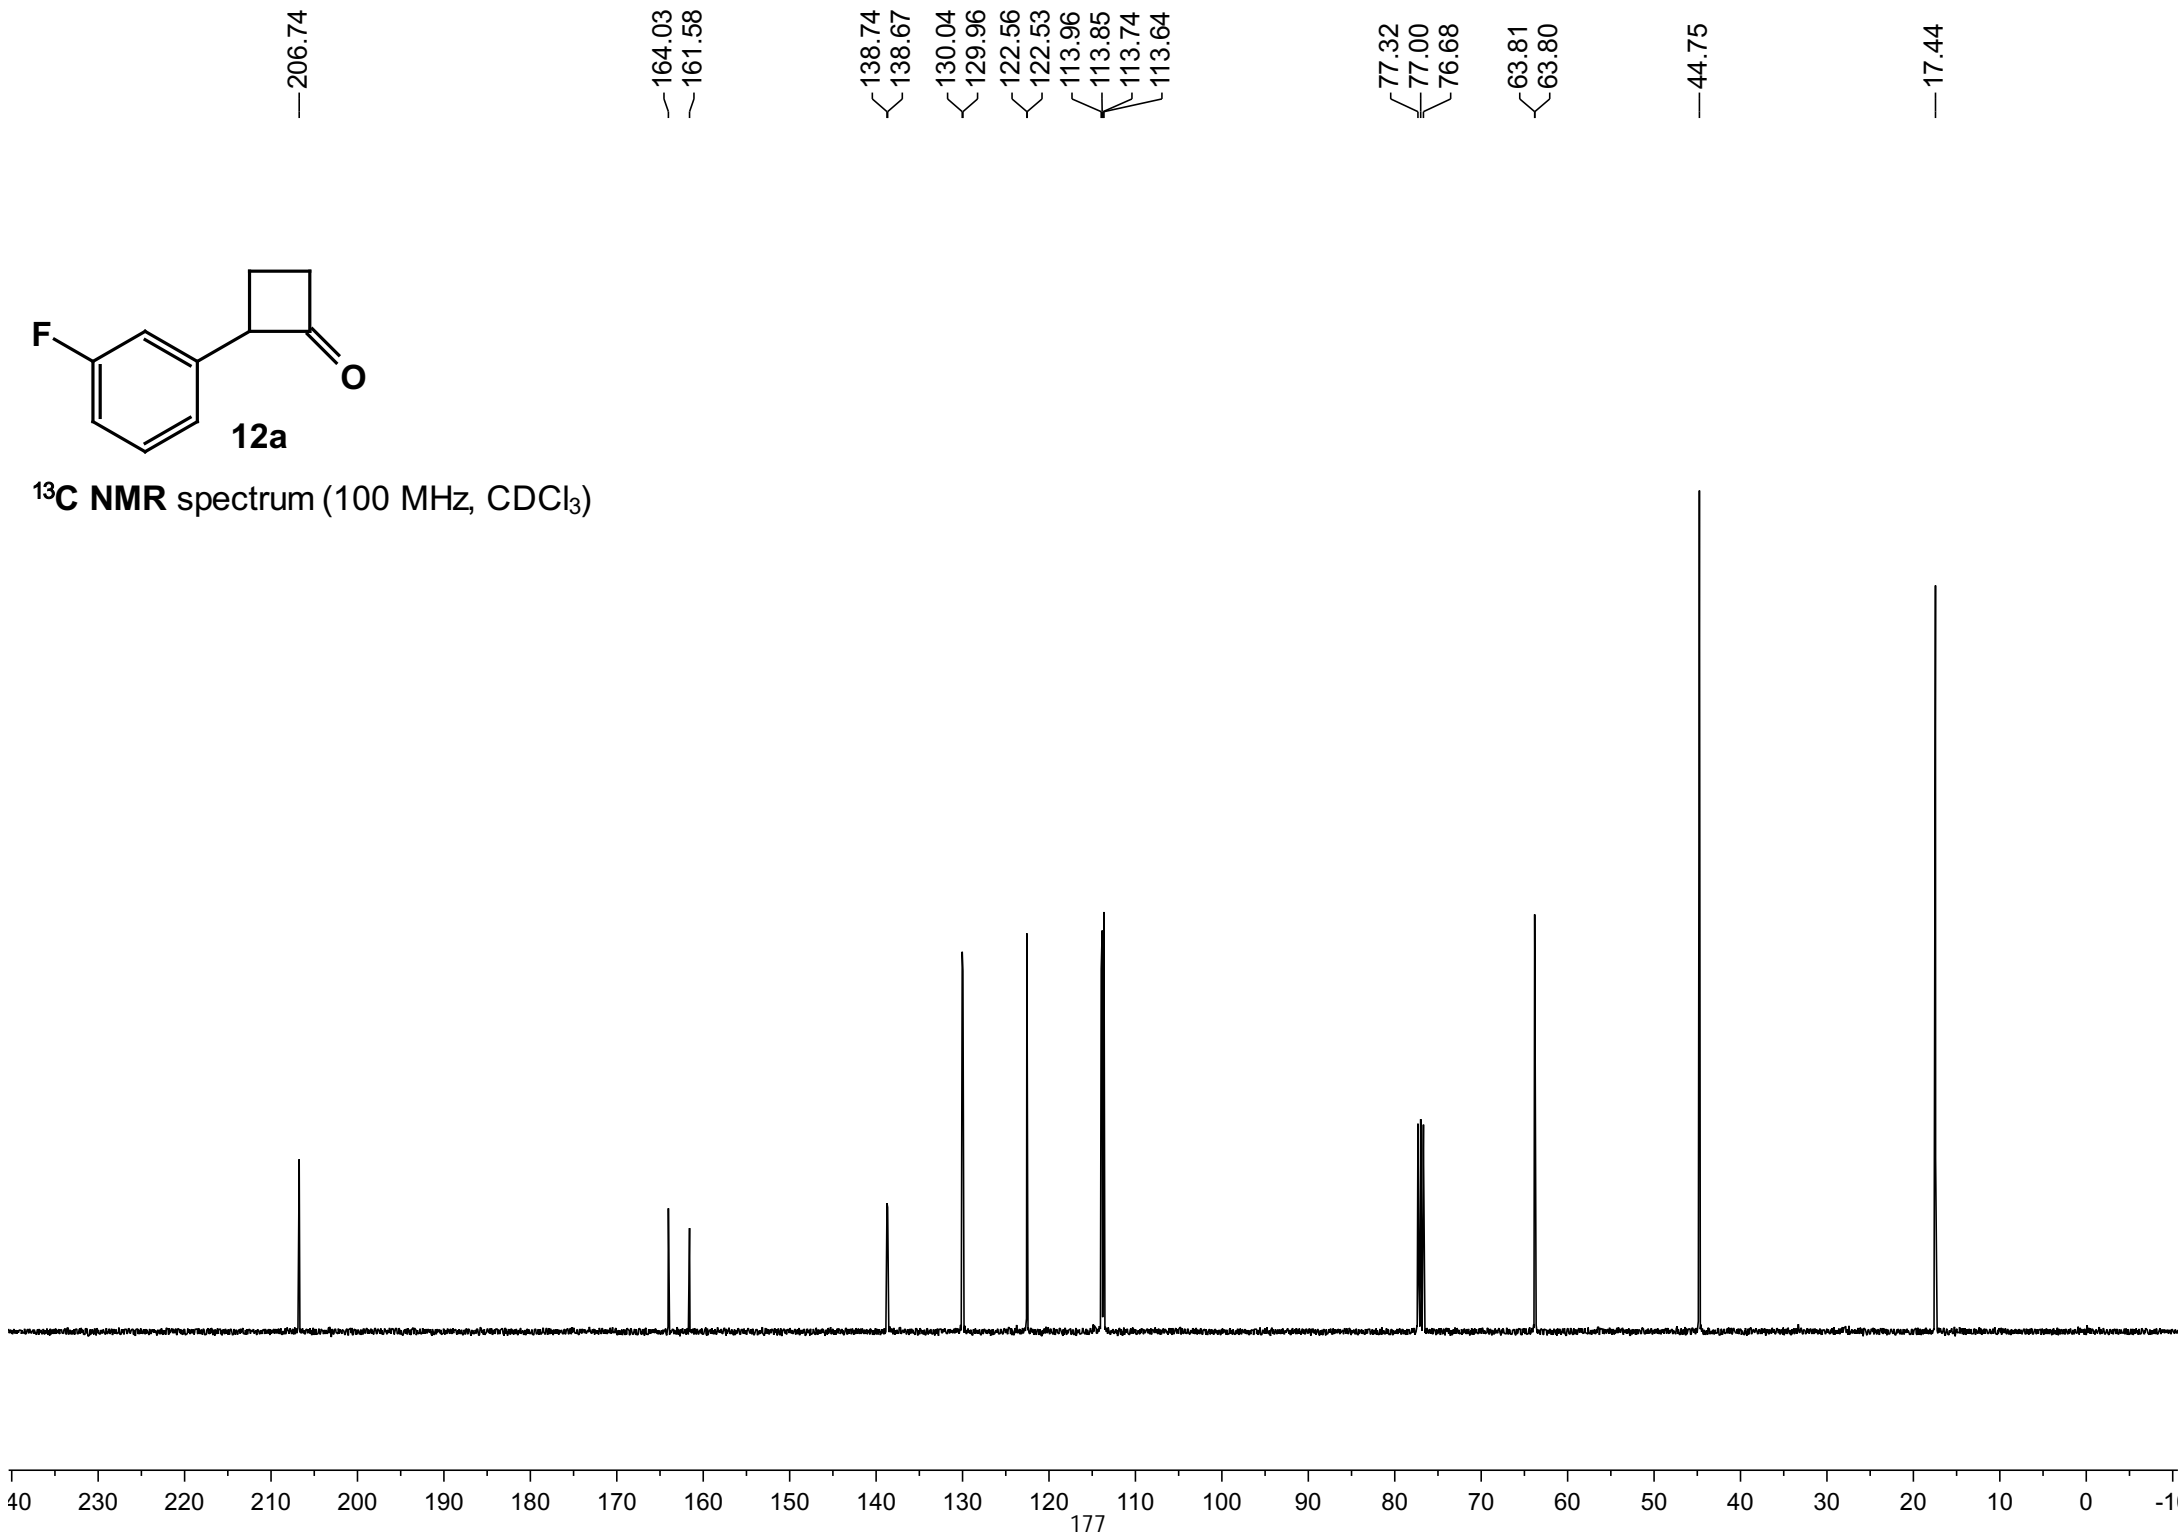



<sup>19</sup>F NMR spectrum (376 MHz, CDCl<sub>3</sub>)

---112.83

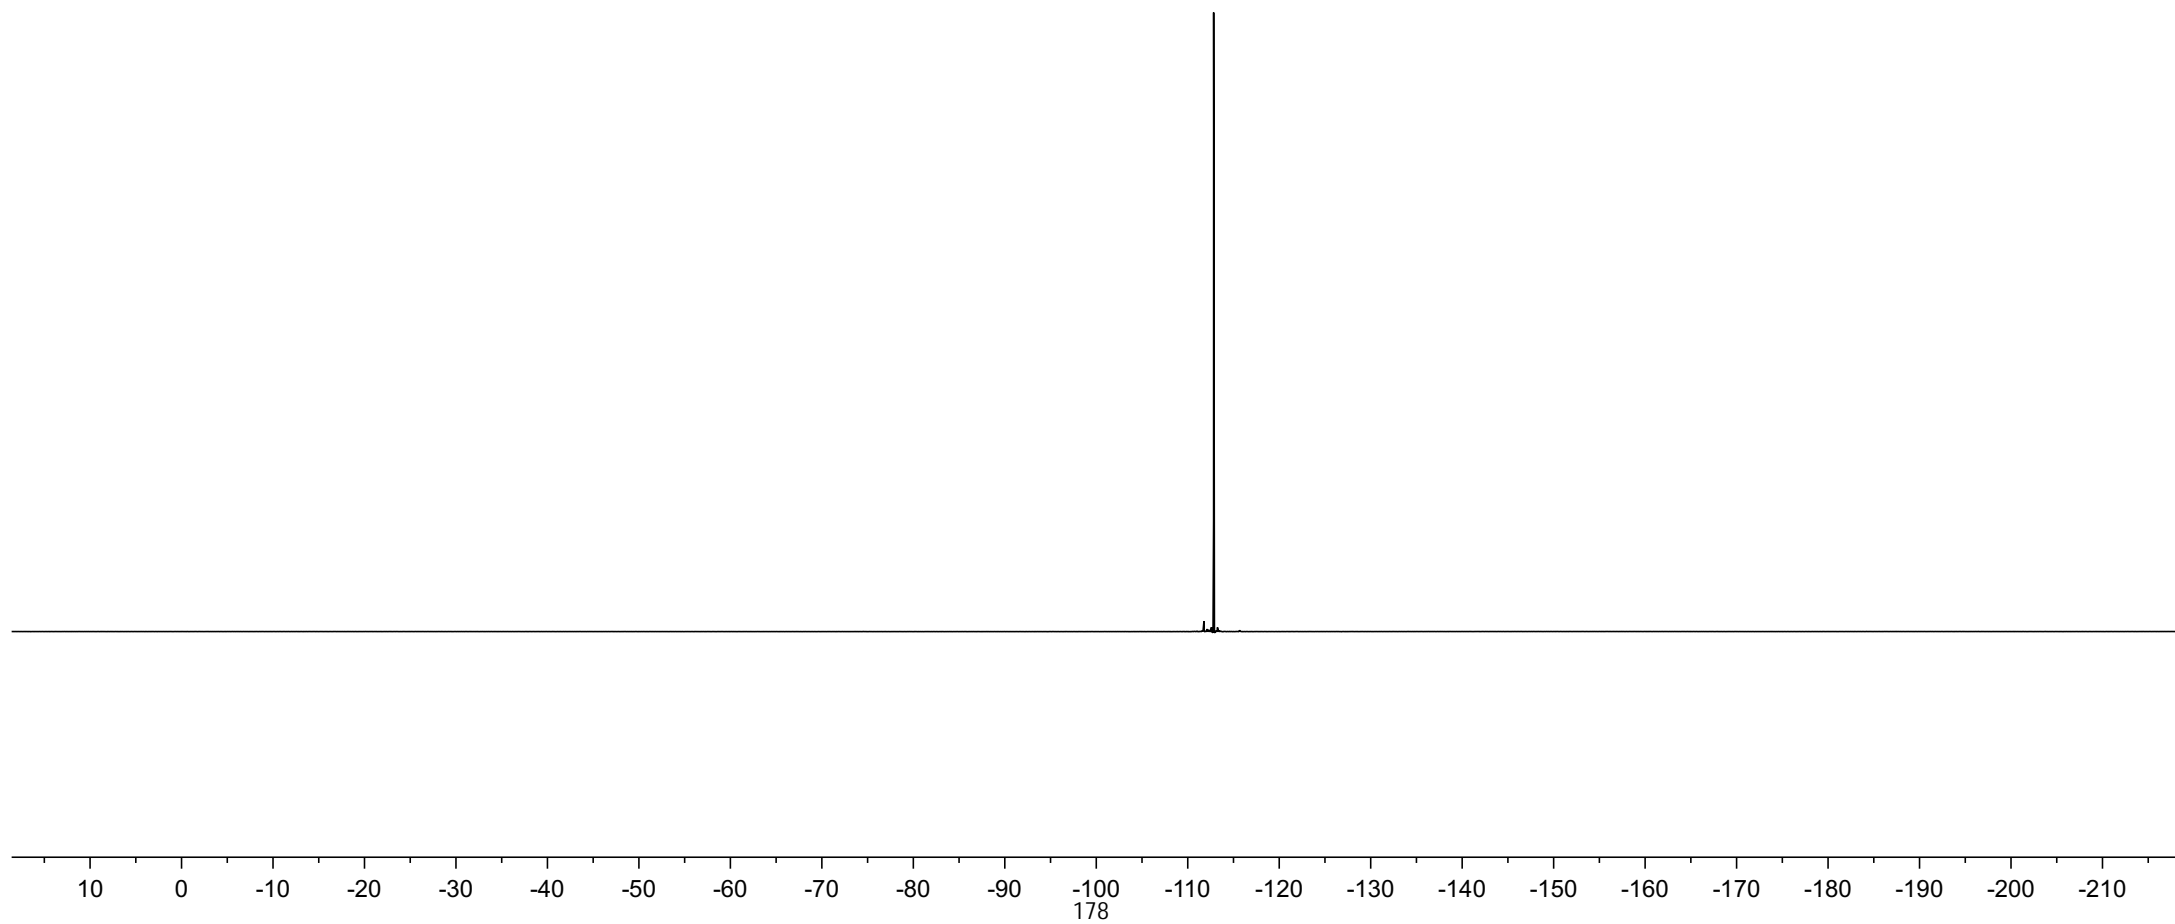

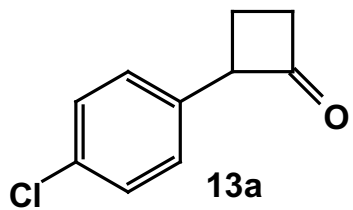

<sup>1</sup>H NMR spectrum (600 MHz, CDCl<sub>3</sub>)

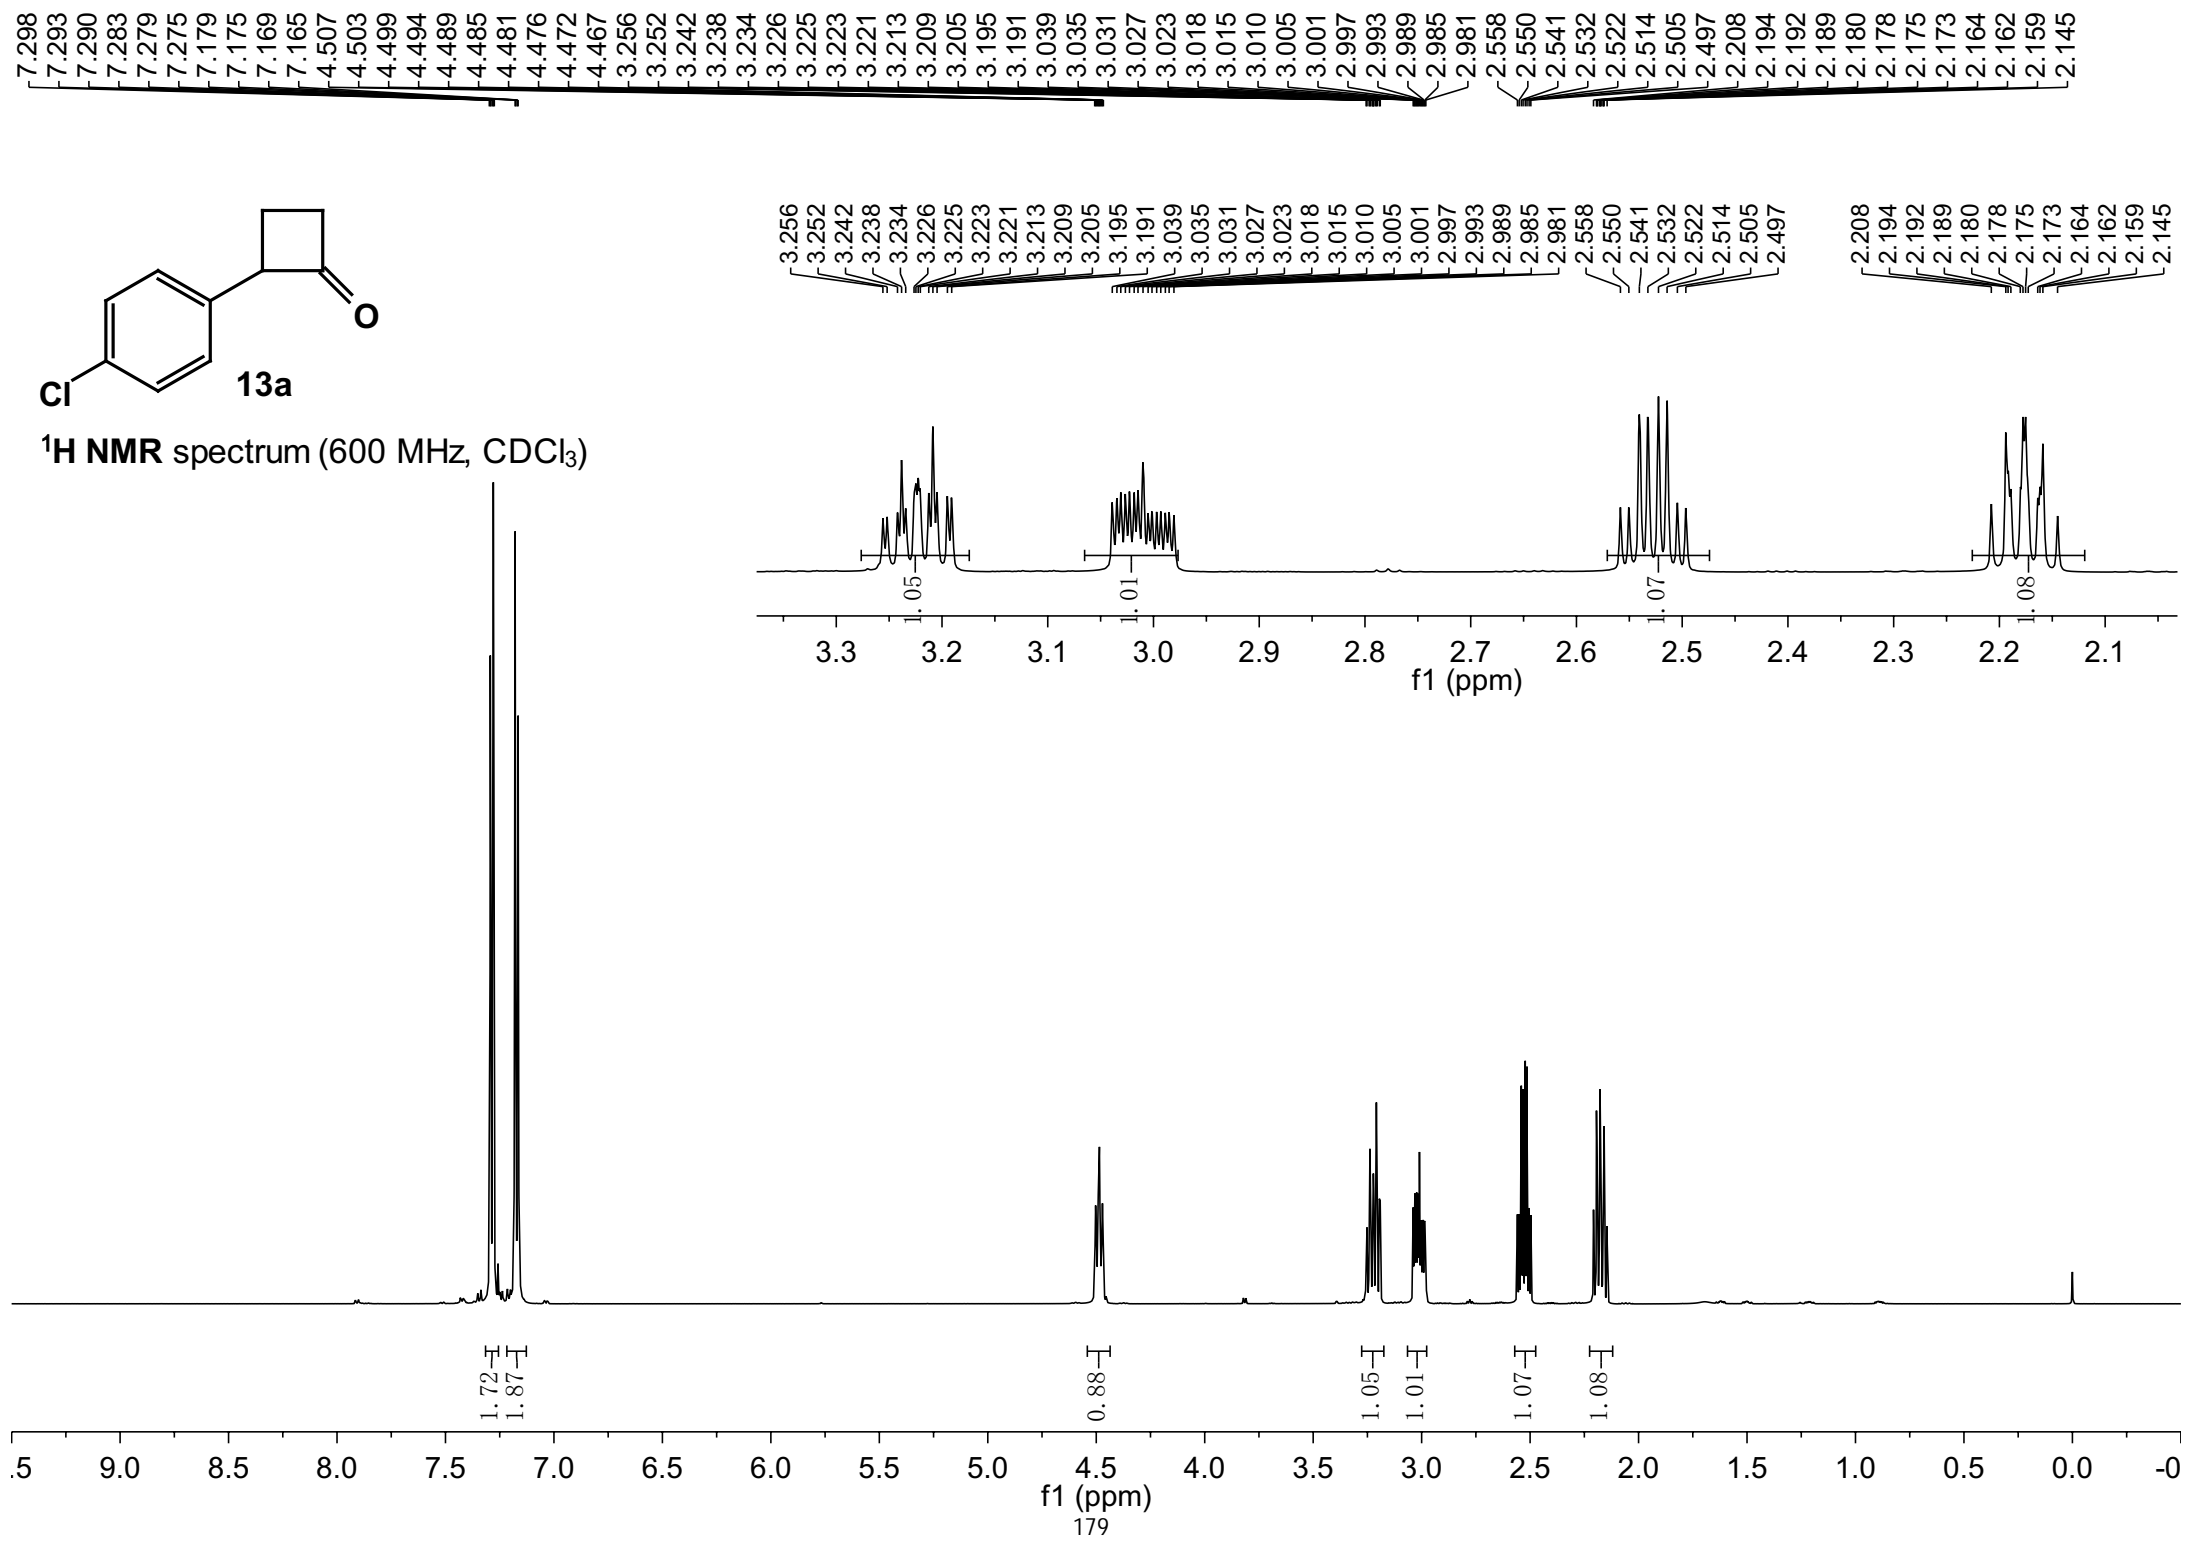



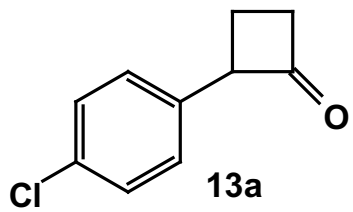

<sup>13</sup>C NMR spectrum (150 MHz, CDCl<sub>3</sub>)

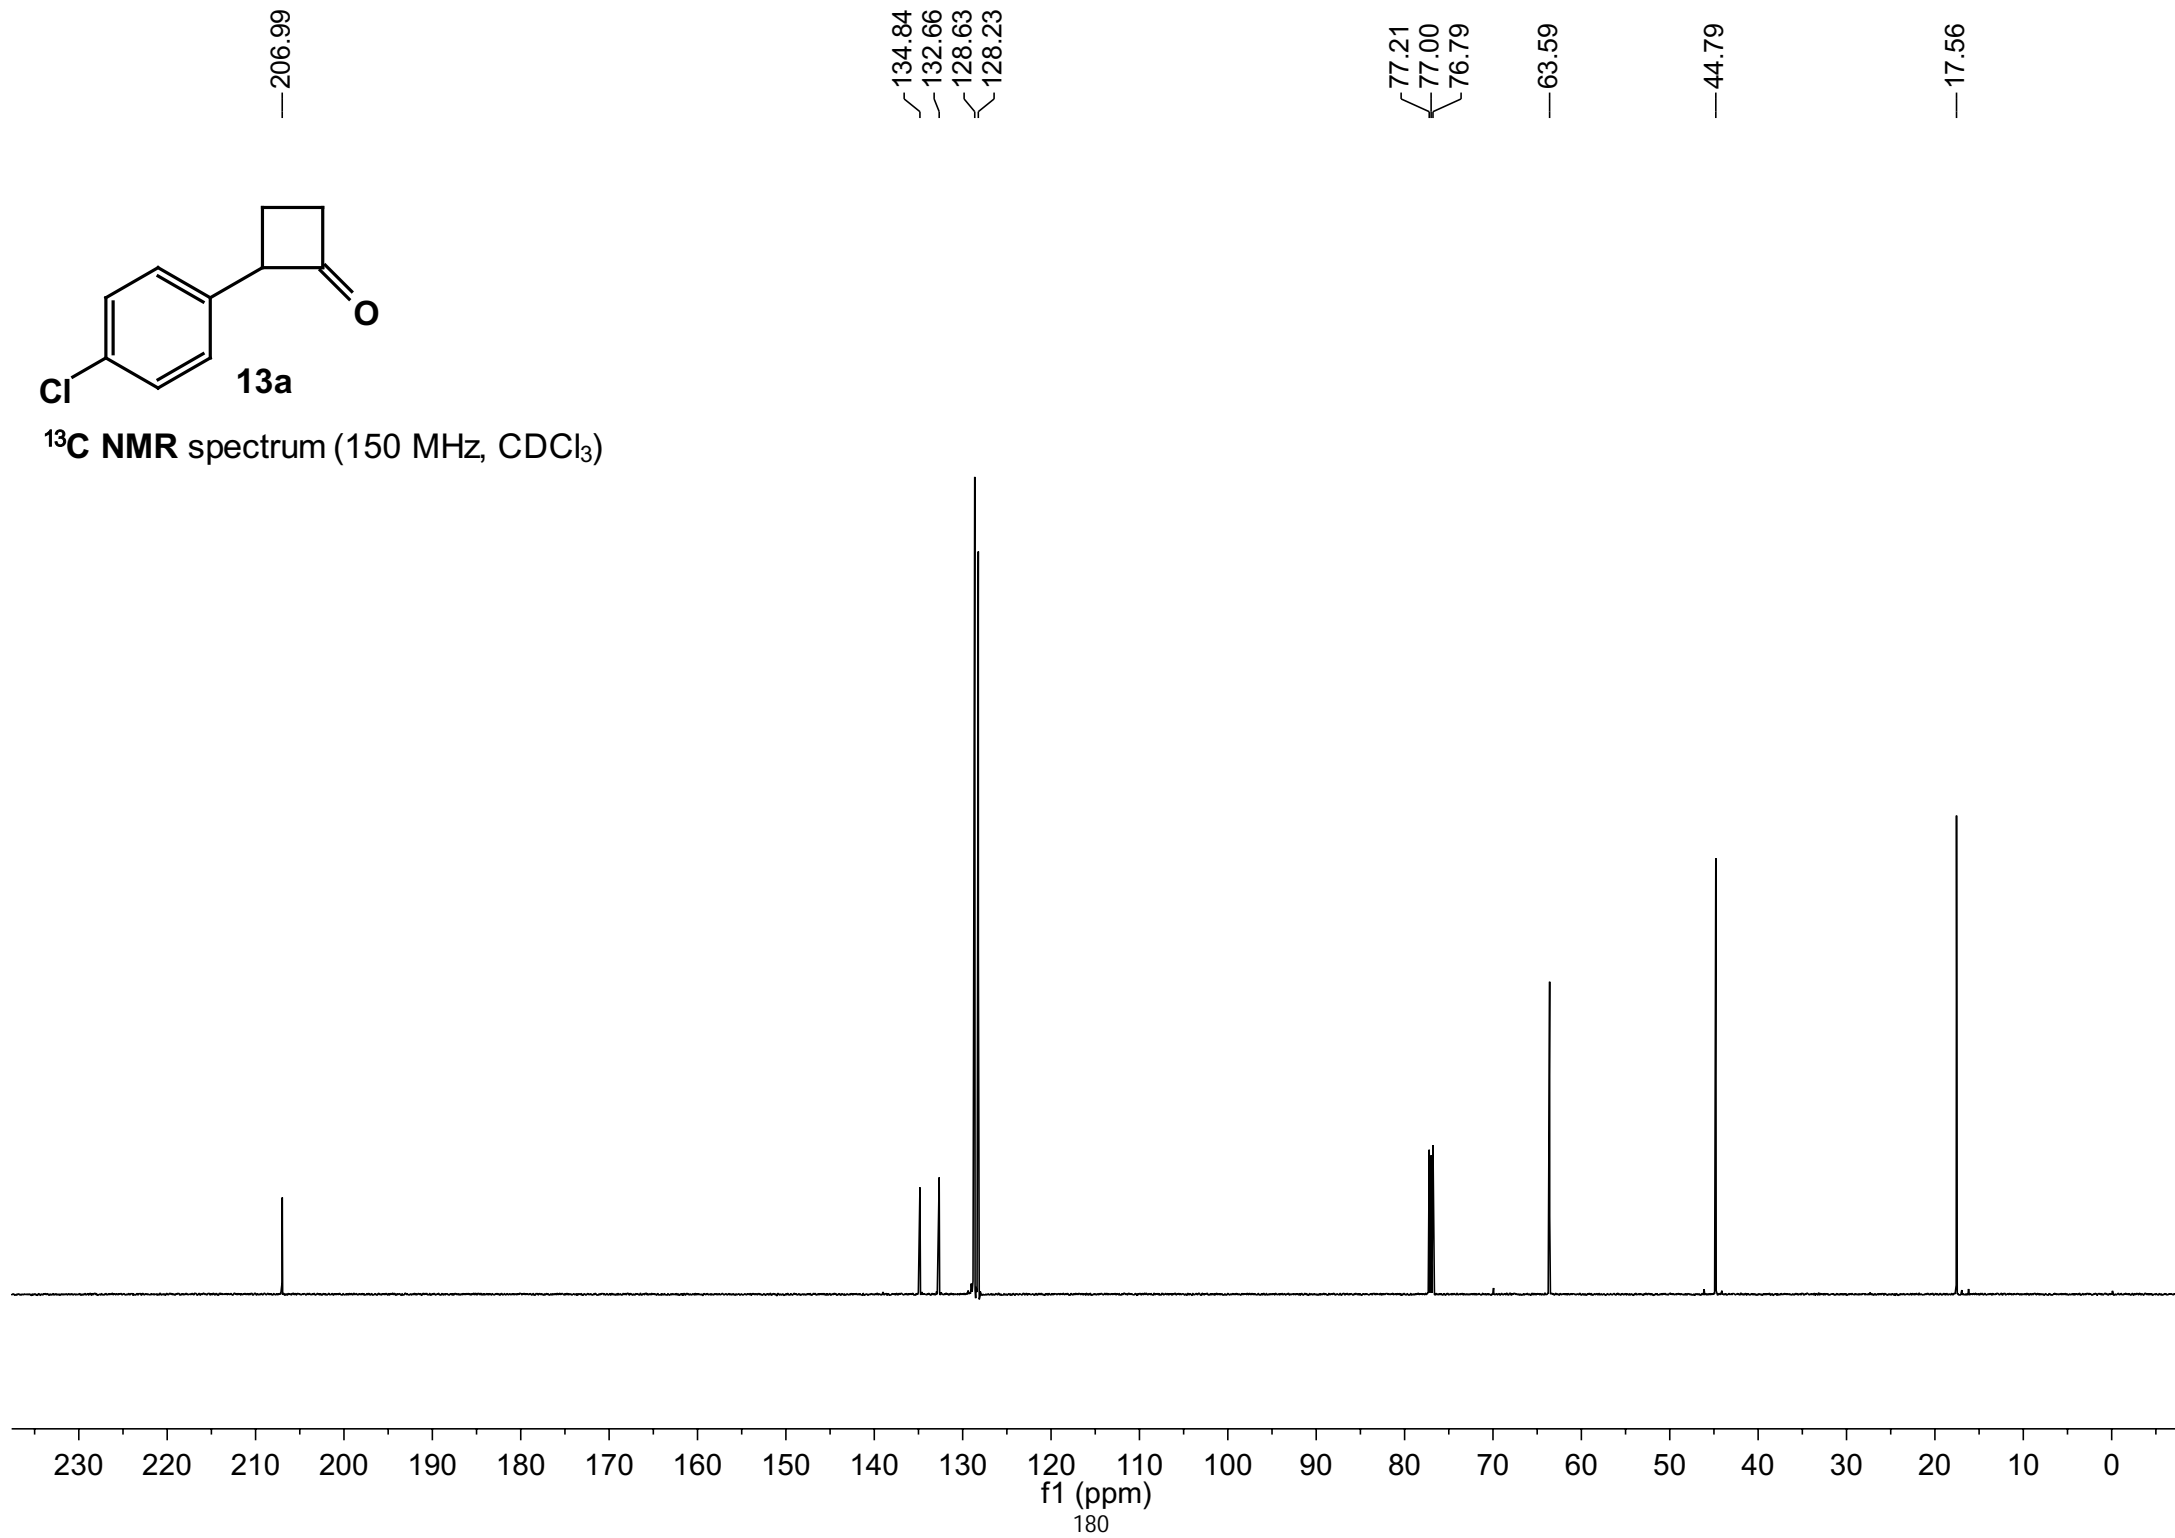

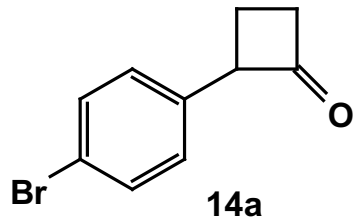

<sup>1</sup>H NMR spectrum (400 MHz, CDCl<sub>3</sub>)

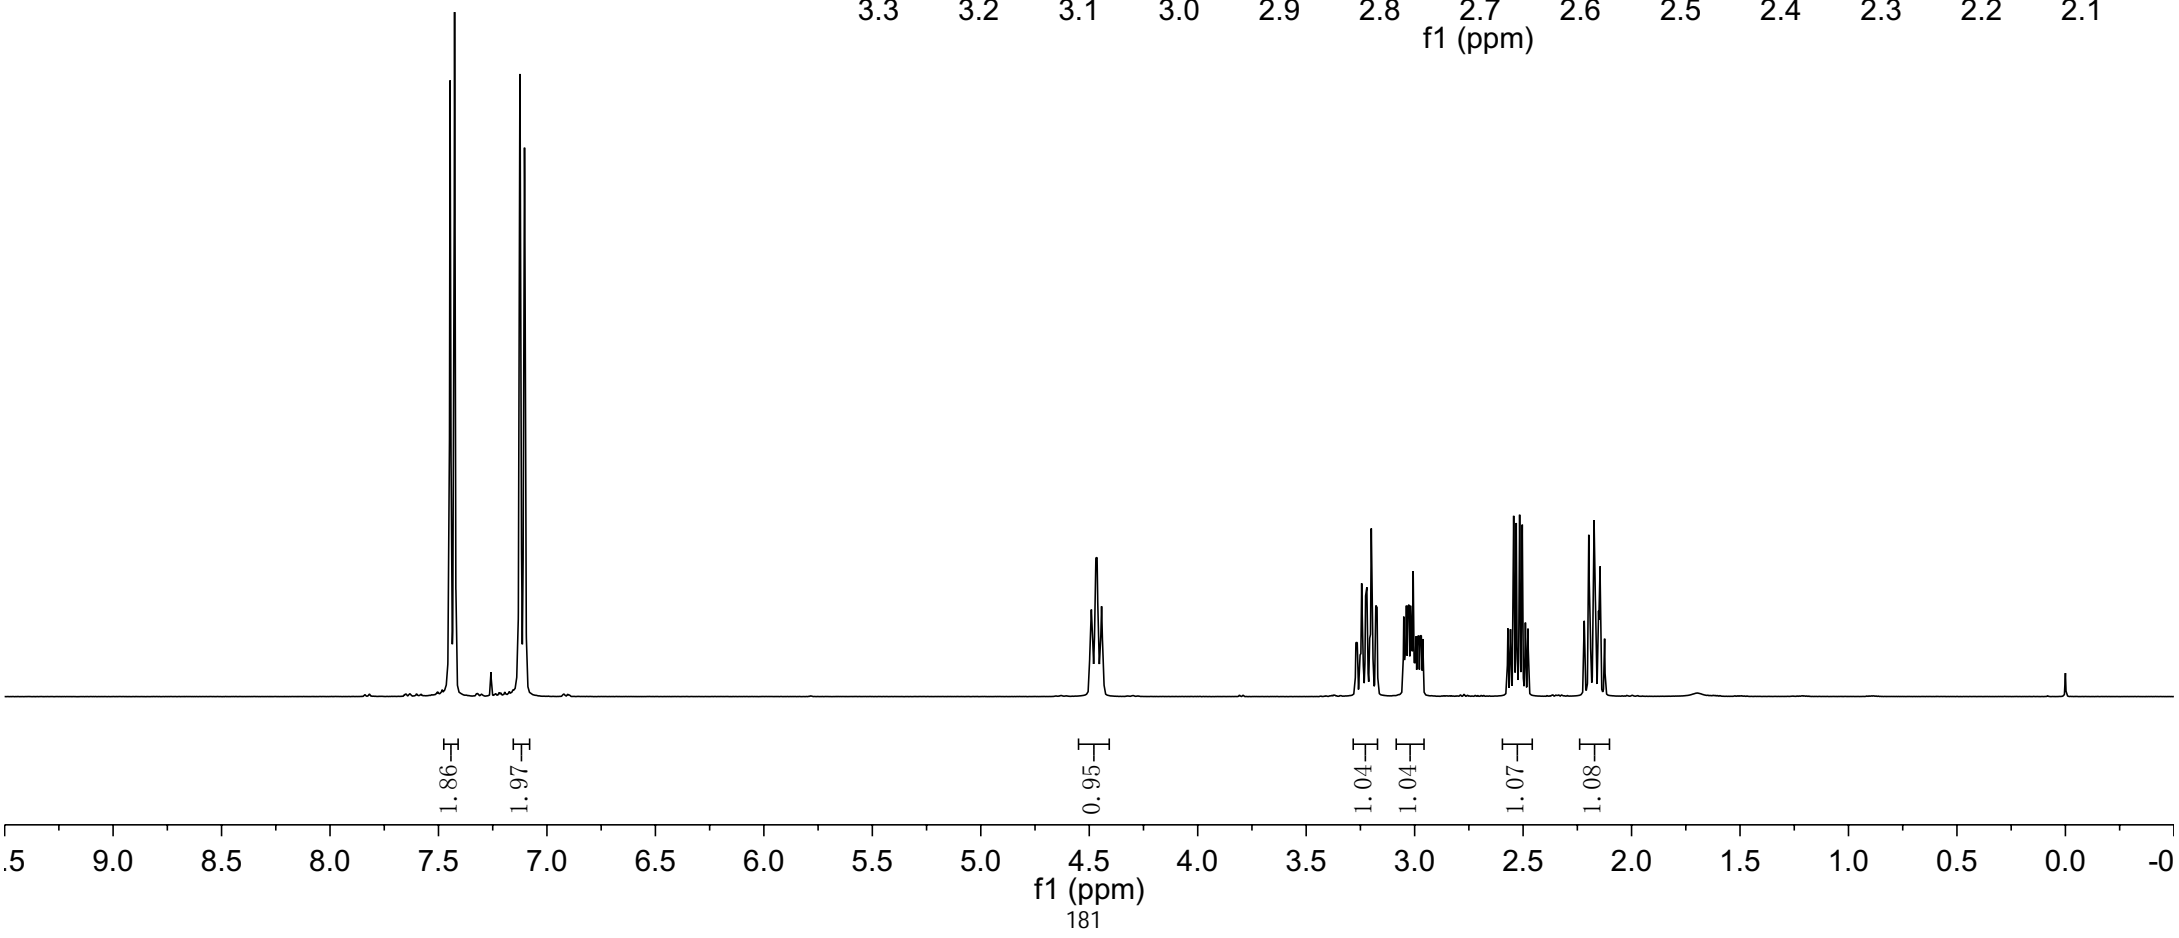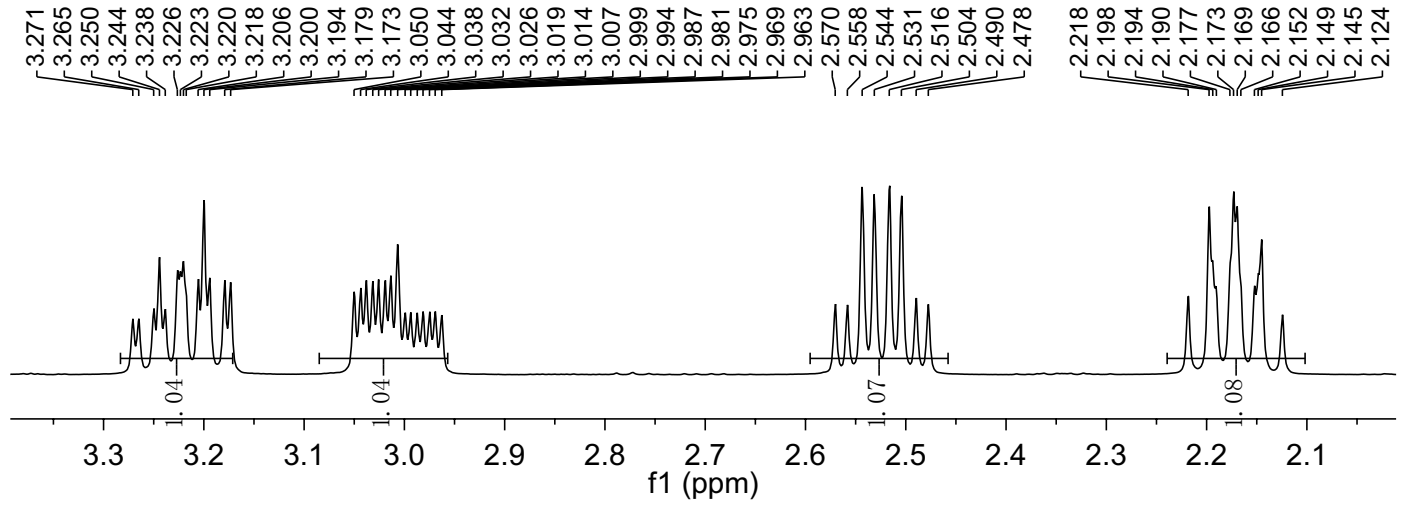

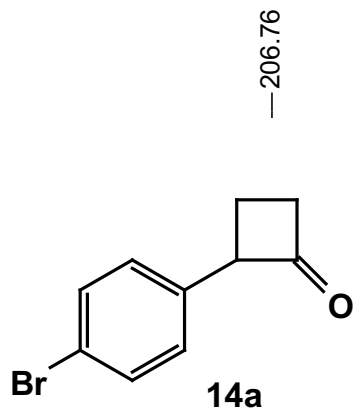

<sup>13</sup>C NMR spectrum (100 MHz, CDCl<sub>3</sub>)

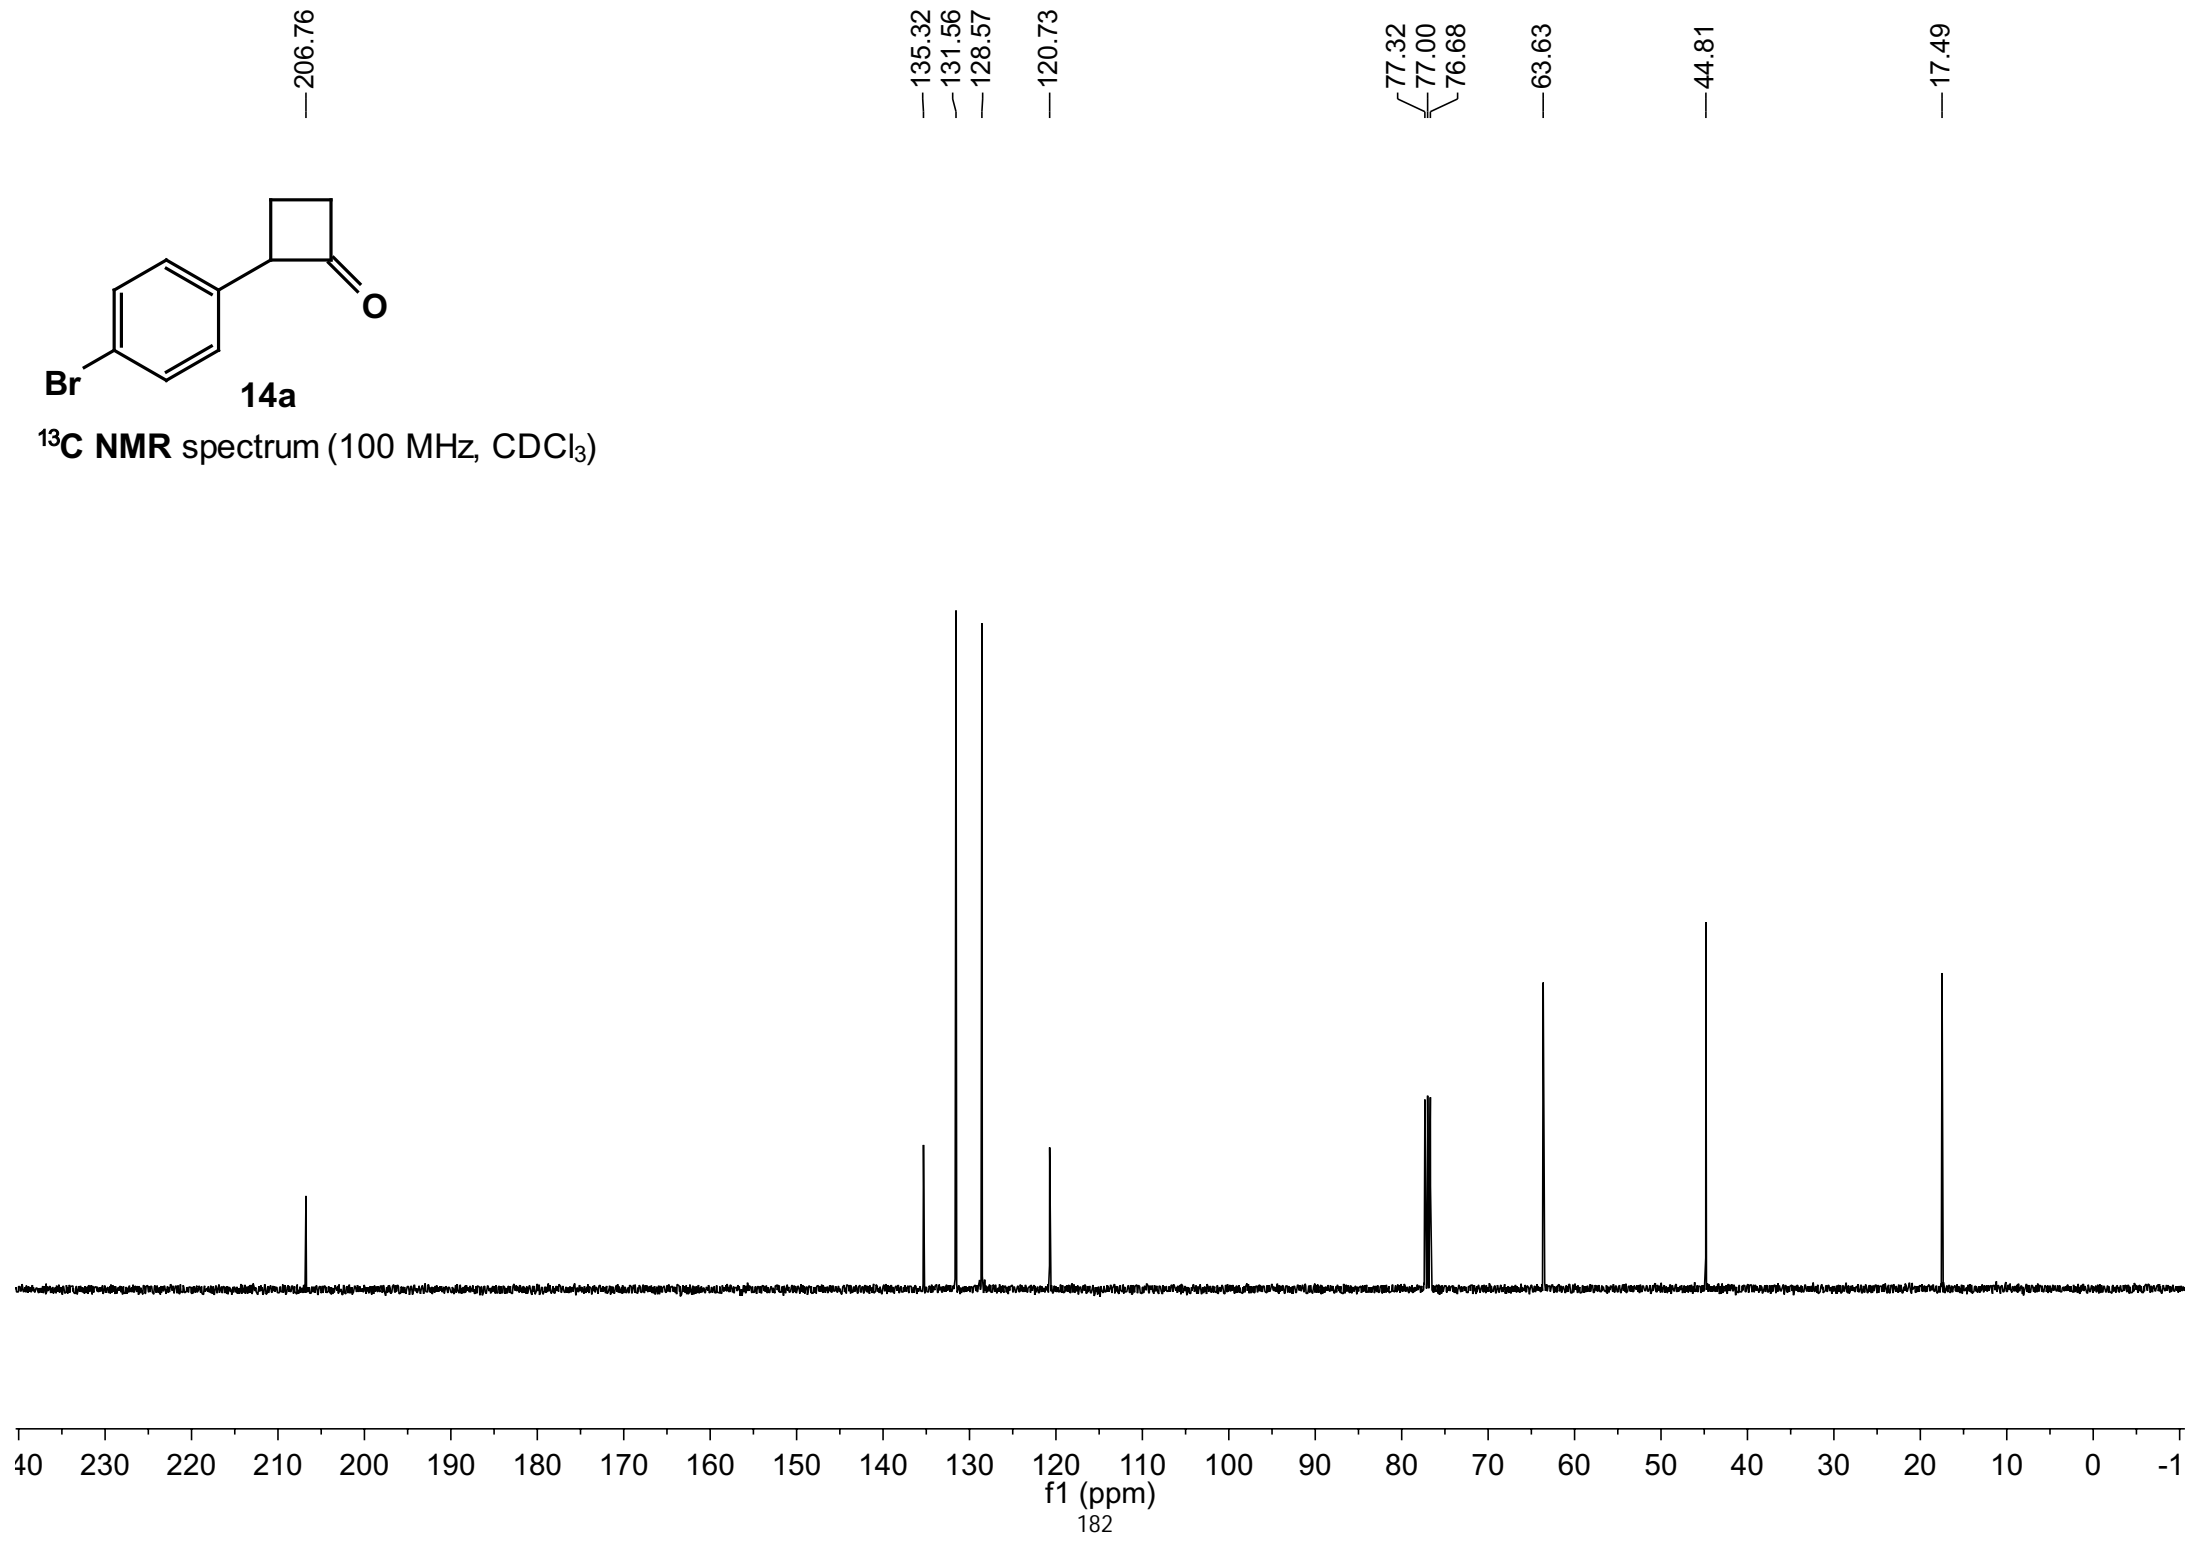

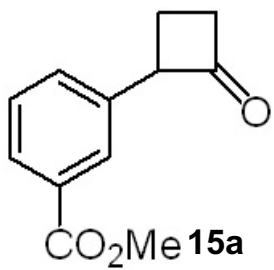

<sup>1</sup>H NMR spectrum (400 MHz, CDCl<sub>3</sub>)

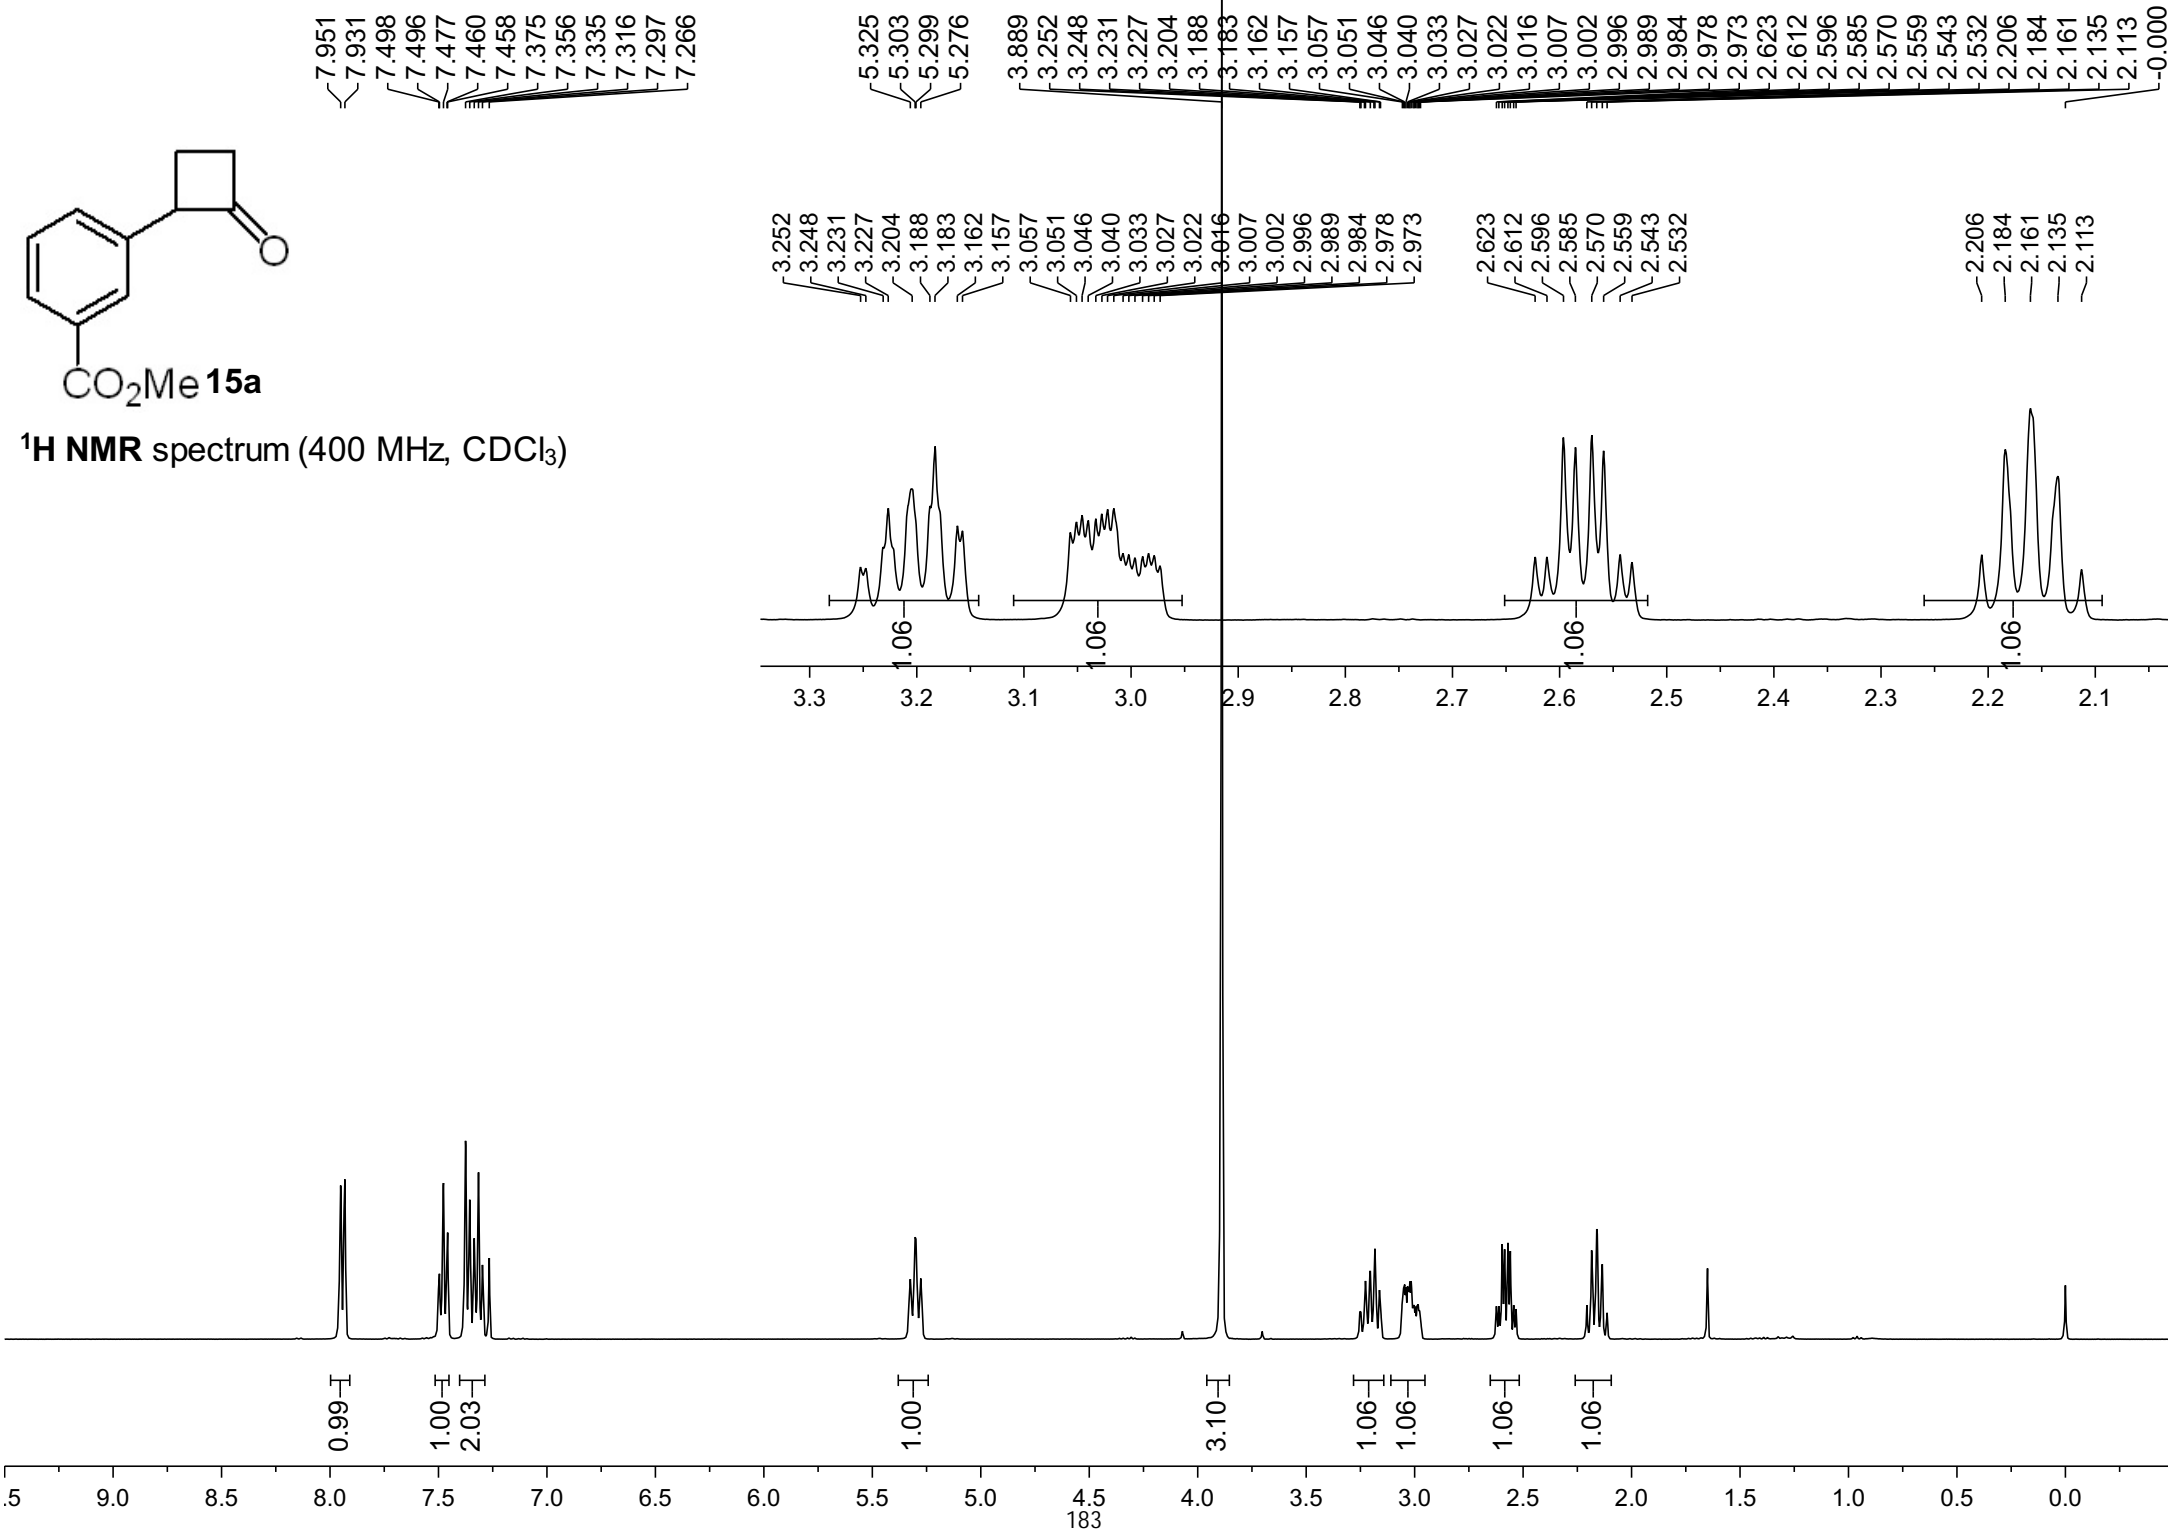

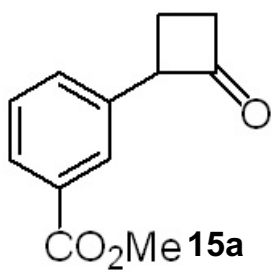

—207.00

—167.72

137.59  
132.34  
130.86  
128.86  
128.38  
126.99

77.32  
77.00  
76.68

—63.11

—52.06

—44.35

—18.77

<sup>13</sup>C NMR spectrum (100 MHz, CDCl<sub>3</sub>)

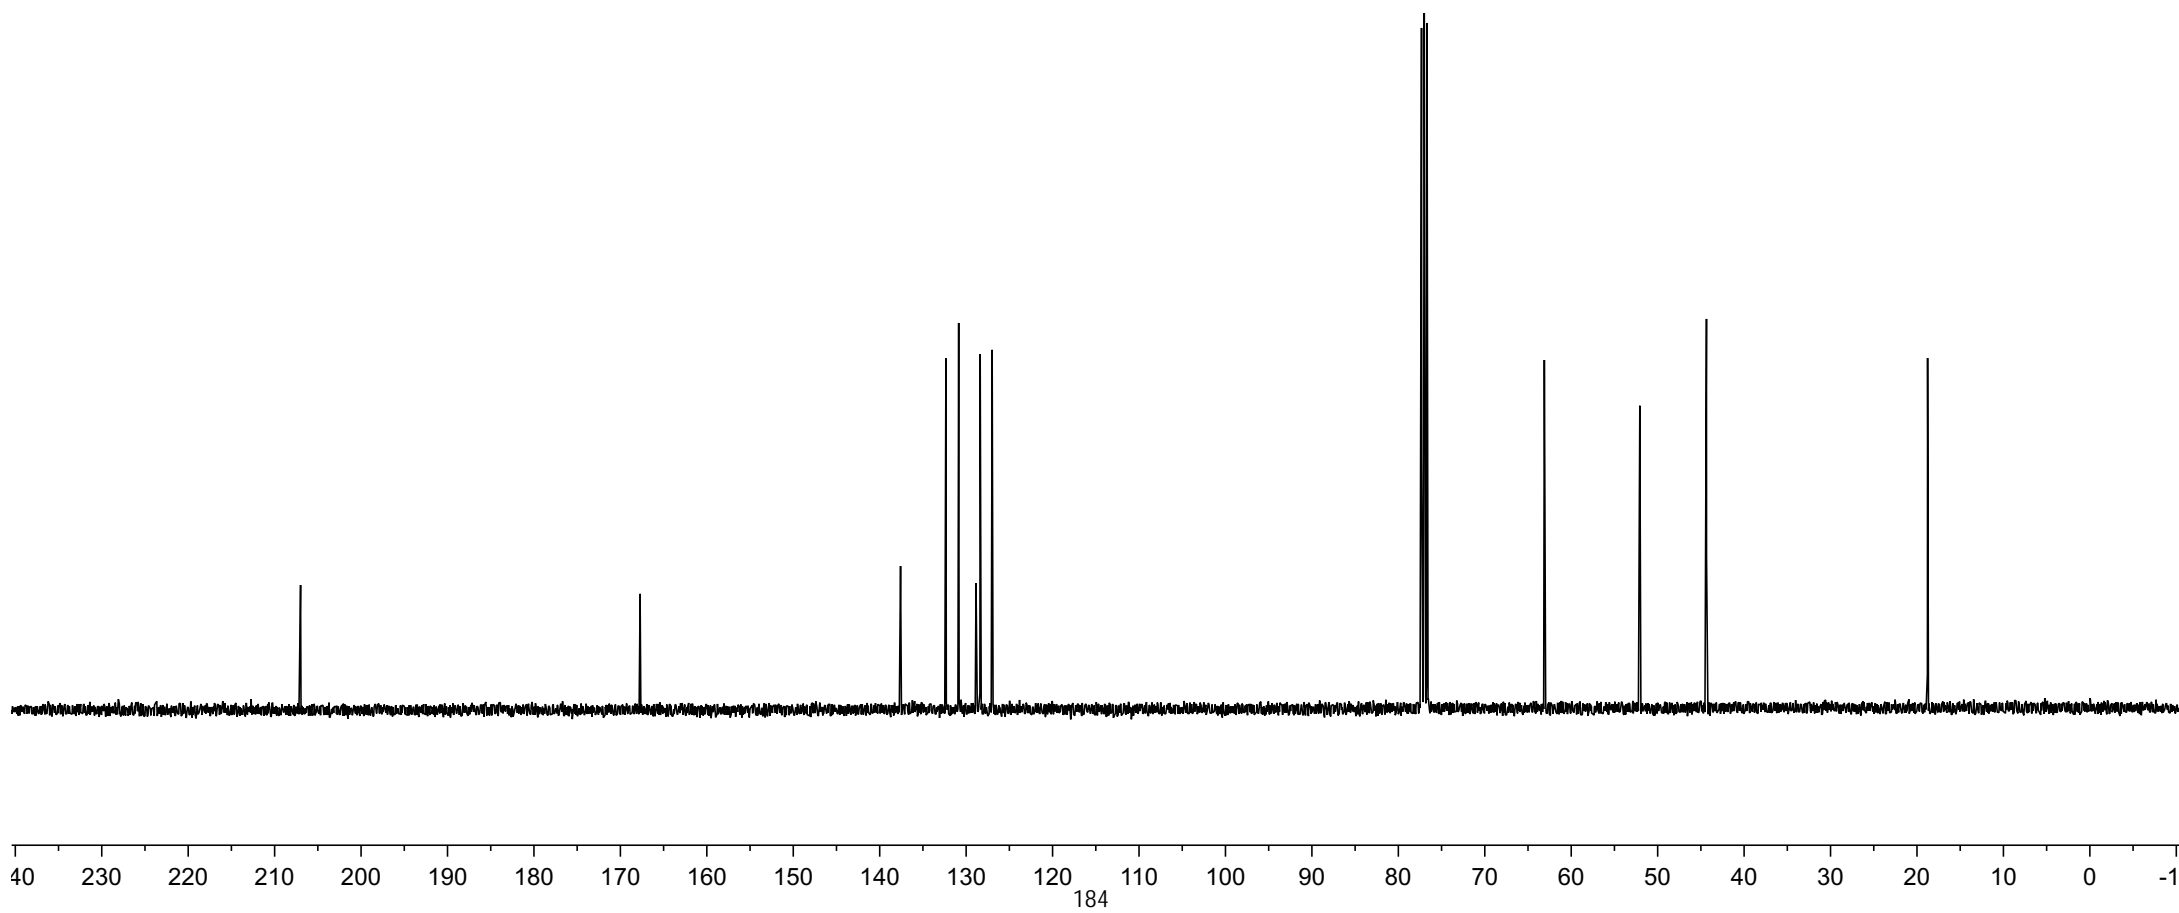

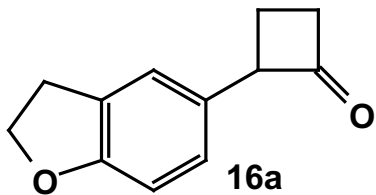

<sup>1</sup>H NMR spectrum (400 MHz, CDCl<sub>3</sub>)

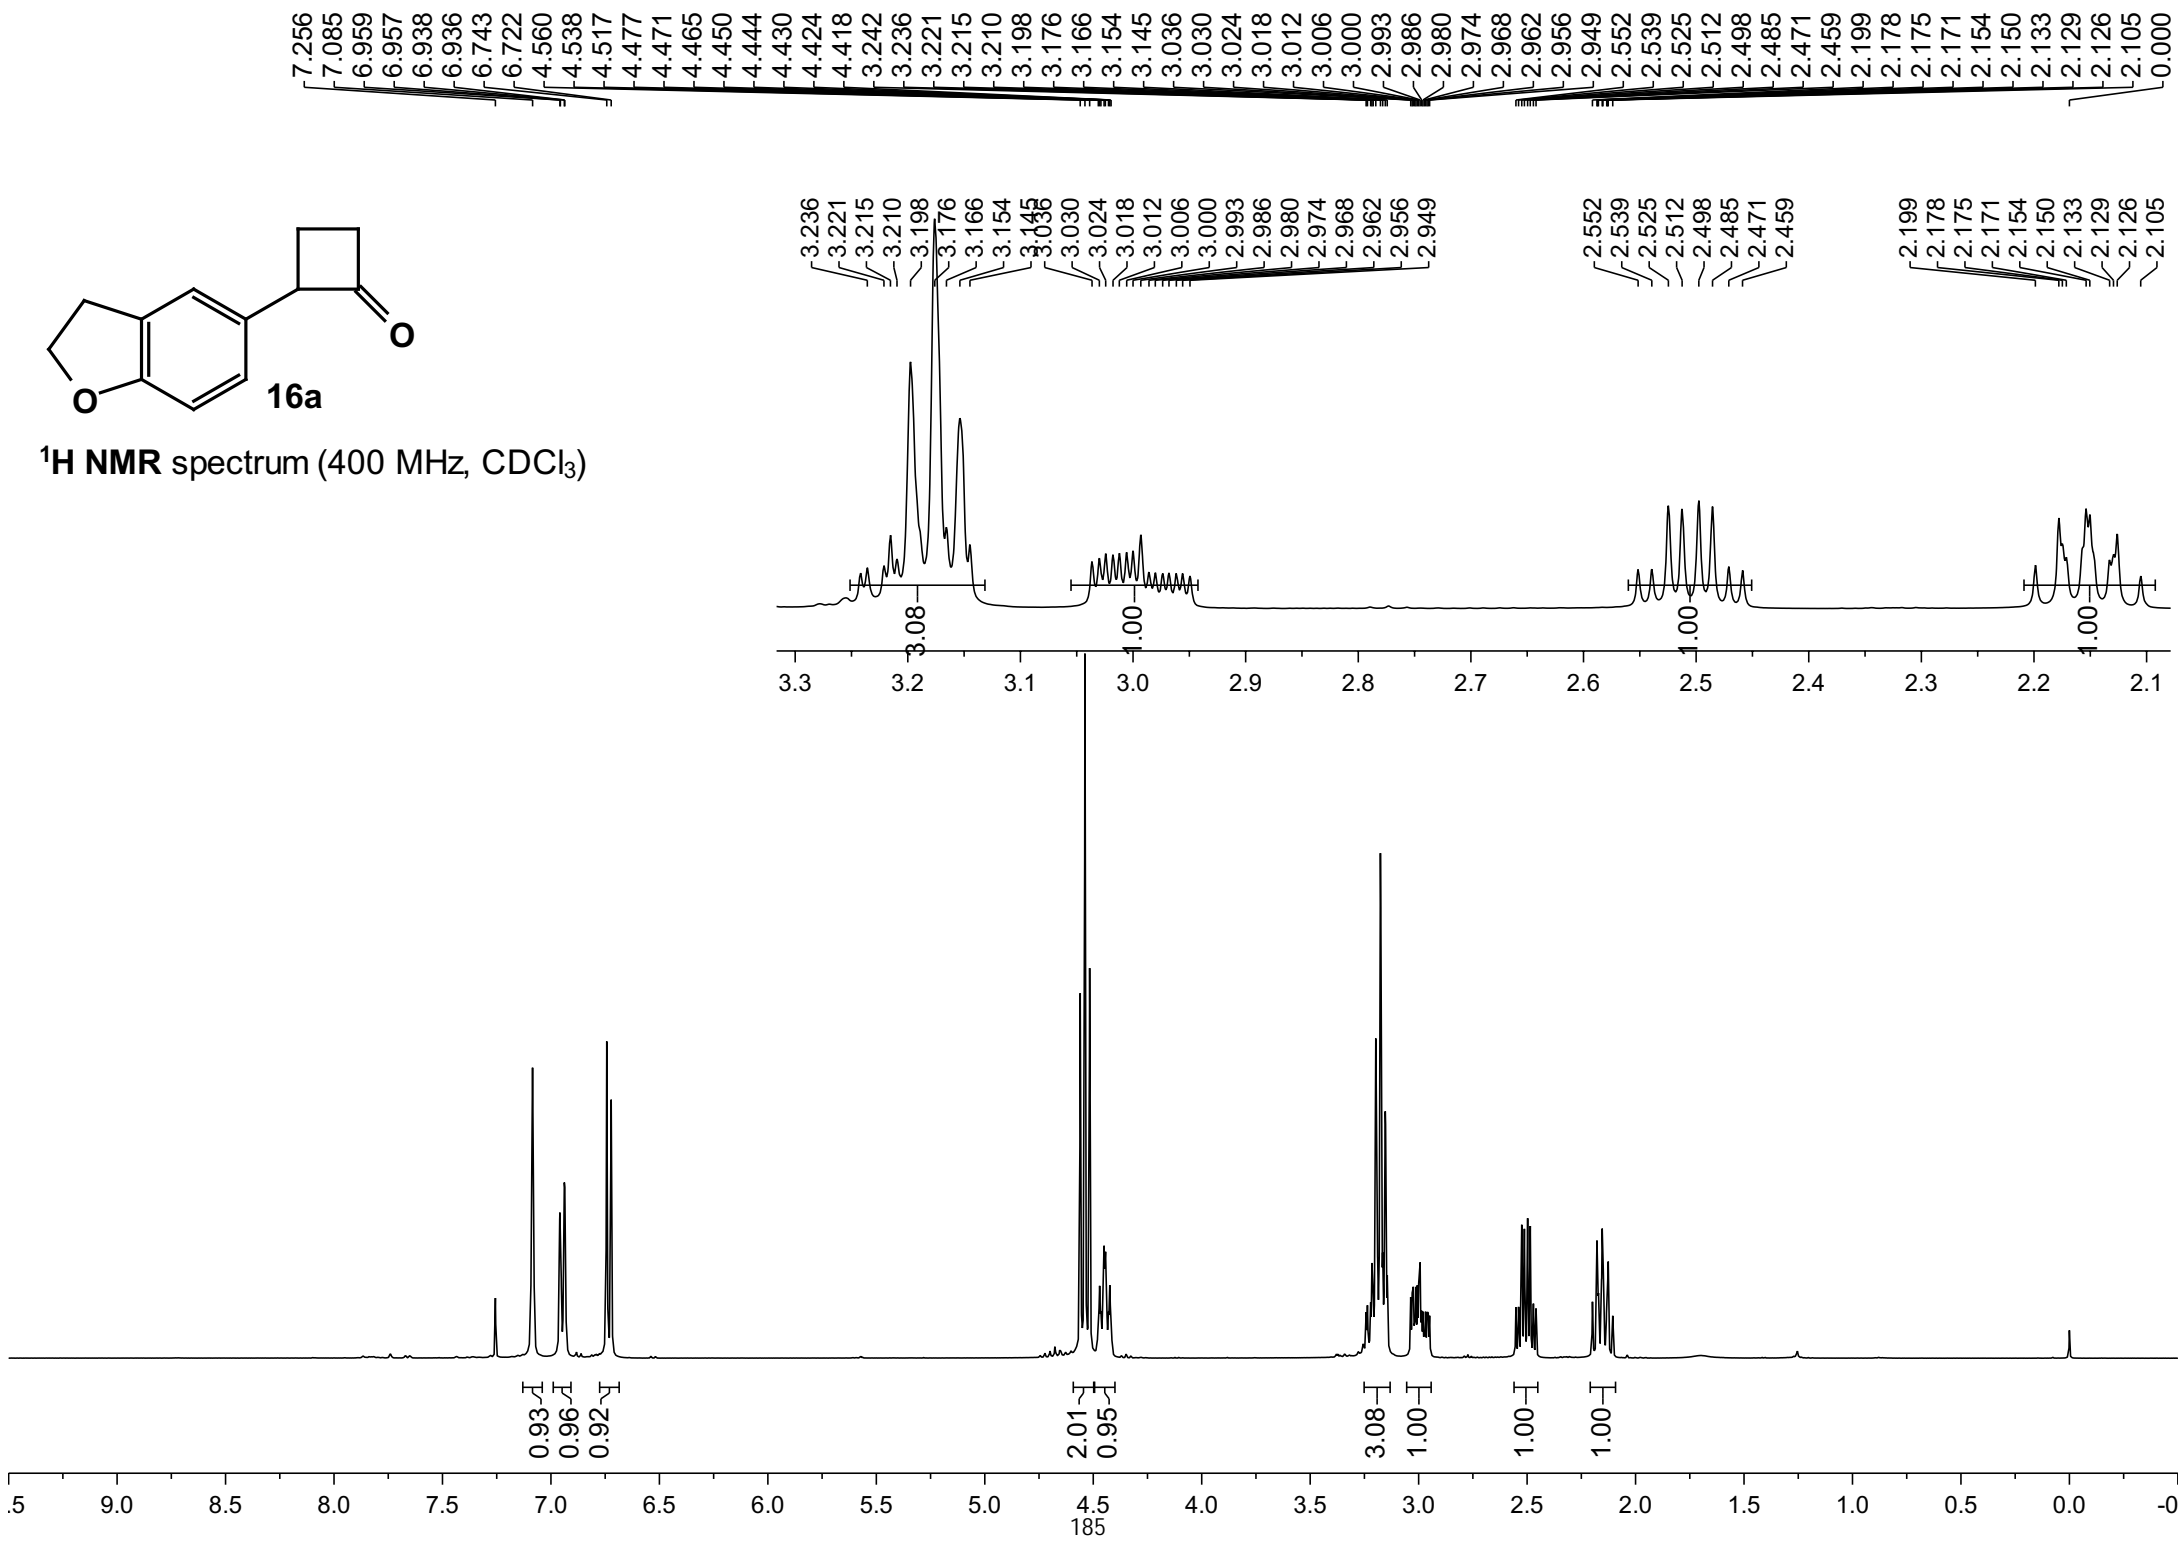

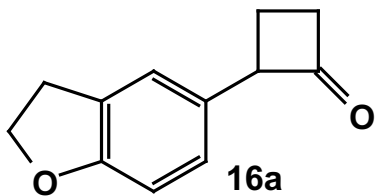

<sup>13</sup>C NMR spectrum (100 MHz, CDCl<sub>3</sub>)

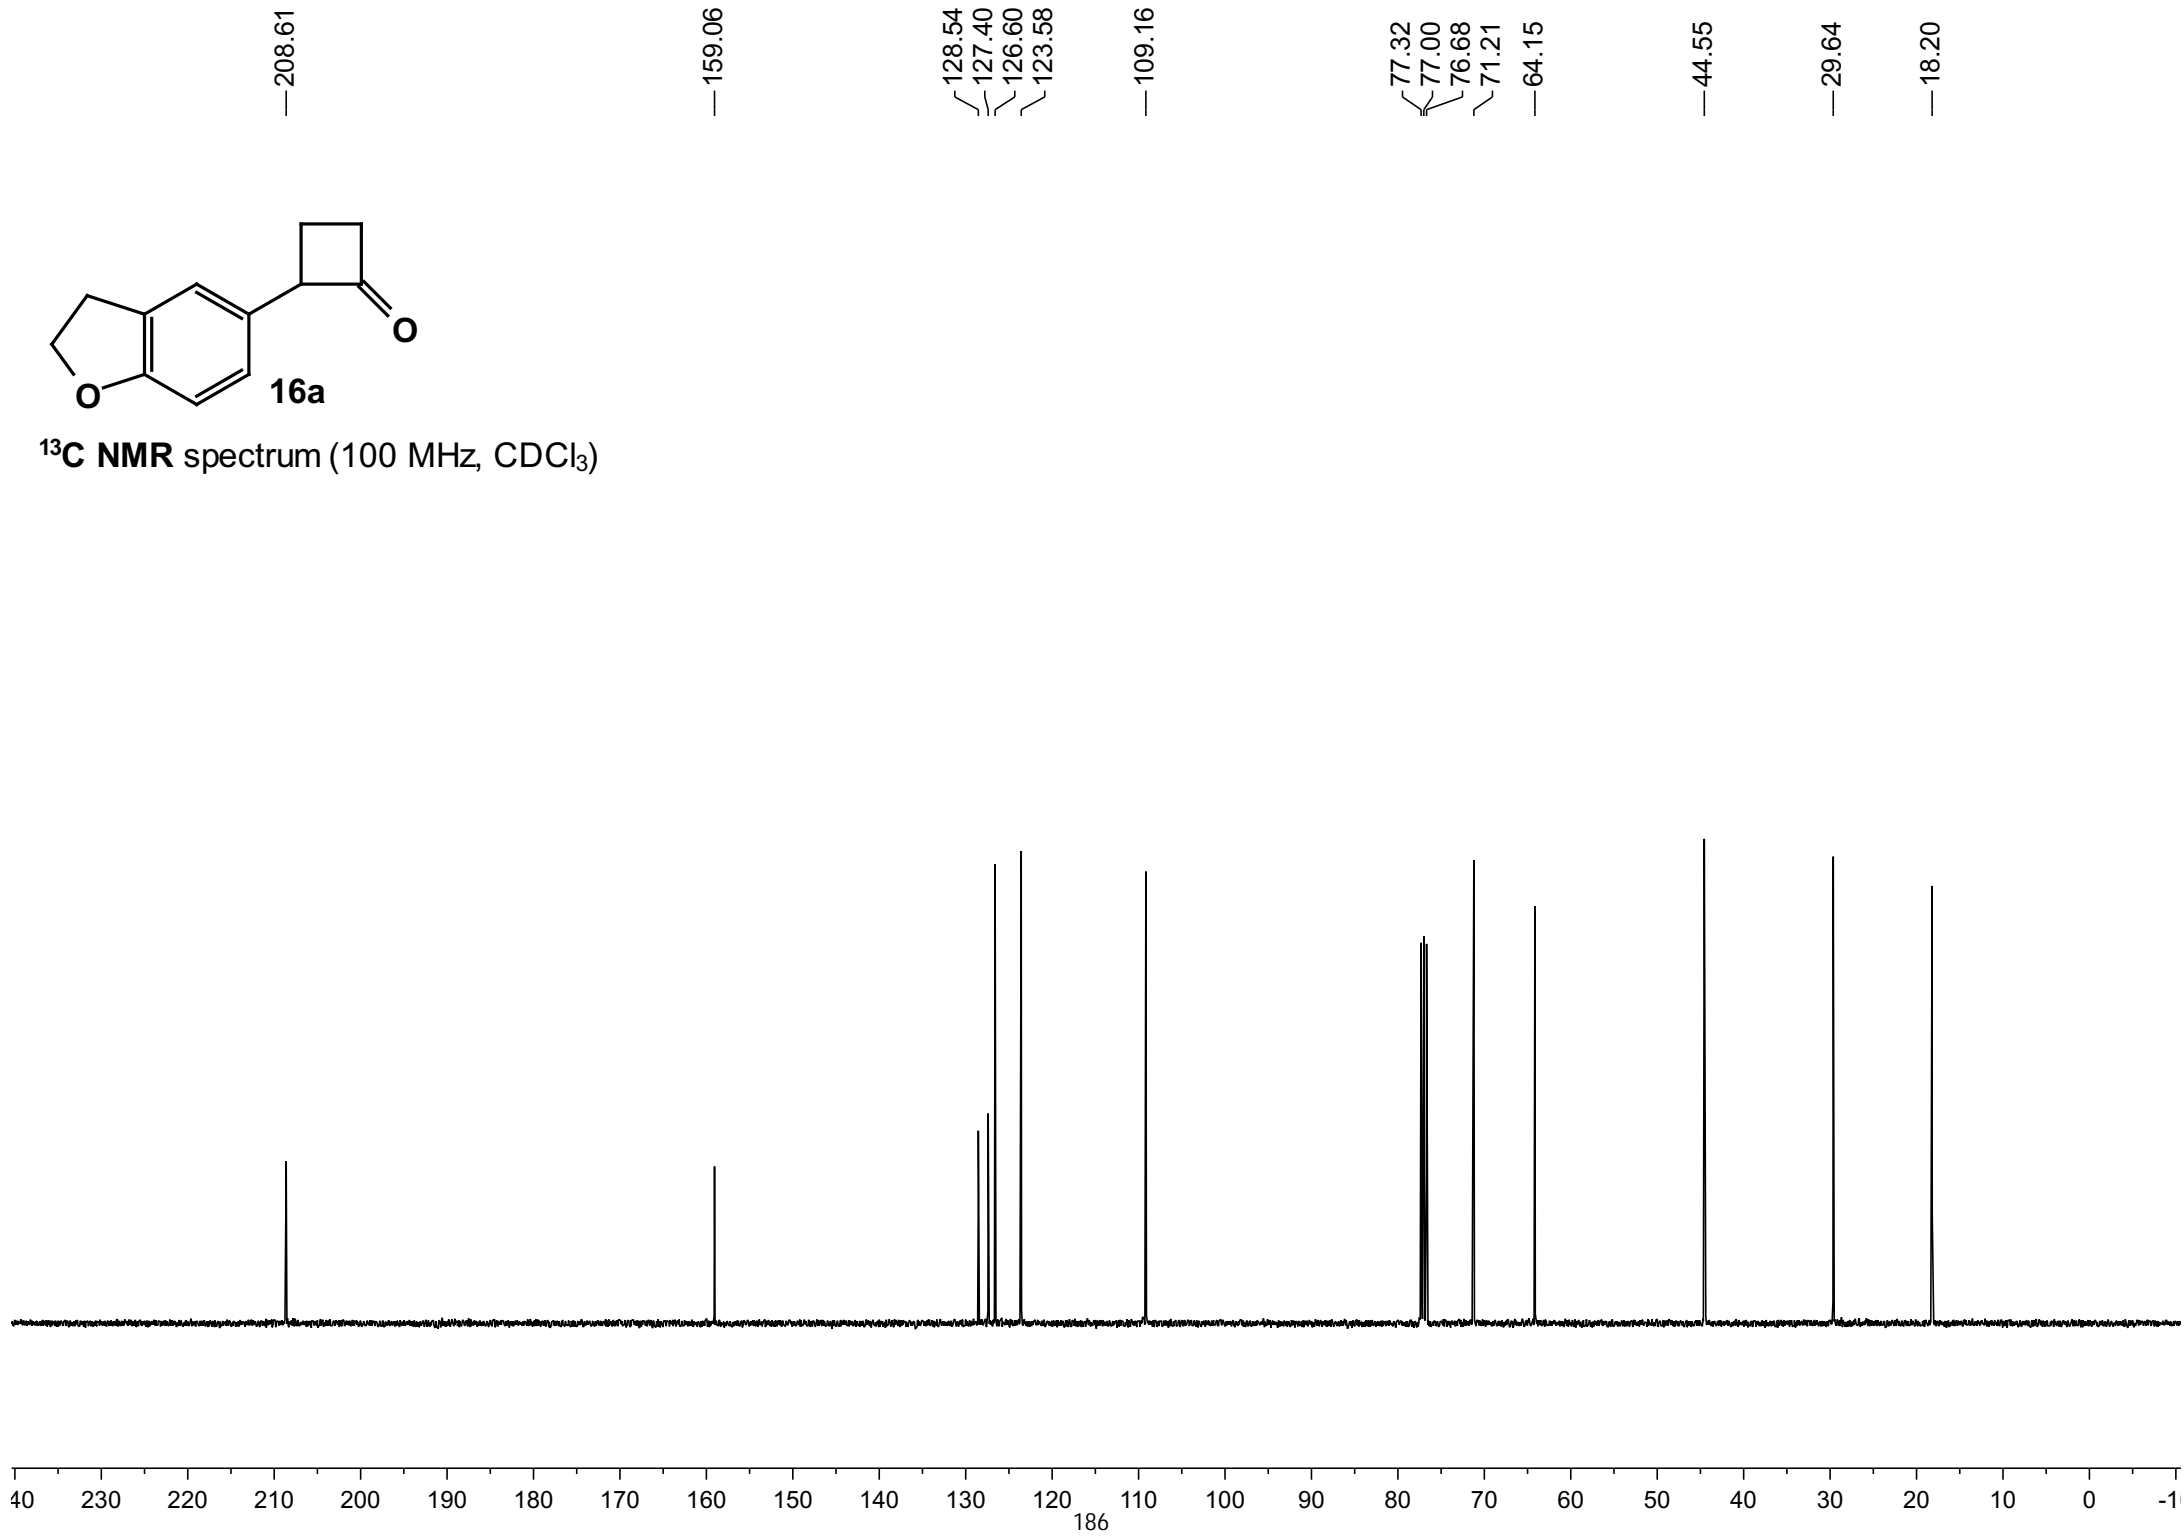

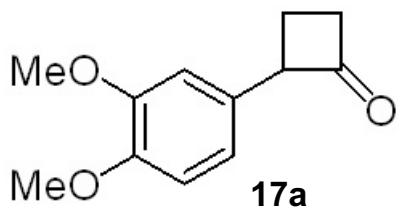

<sup>1</sup>H NMR spectrum (600 MHz, CDCl<sub>3</sub>)

7.271, 6.841, 6.827, 6.784, 6.773, 4.496, 4.492, 4.483, 4.479, 4.469, 4.465, 3.881, 3.858, 3.245, 3.241, 3.231, 3.227, 3.223, 3.215, 3.214, 3.211, 3.202, 3.198, 3.194, 3.184, 3.180, 3.180, 3.052, 3.047, 3.044, 3.039, 3.036, 3.031, 3.027, 3.023, 3.018, 3.014, 3.010, 3.006, 3.002, 2.998, 2.994, 2.994, 2.558, 2.550, 2.540, 2.532, 2.522, 2.514, 2.504, 2.522, 2.514, 2.504, 2.227, 2.213, 2.211, 2.197, 2.195, 2.183, 2.181, 2.178, 2.164, -0.000

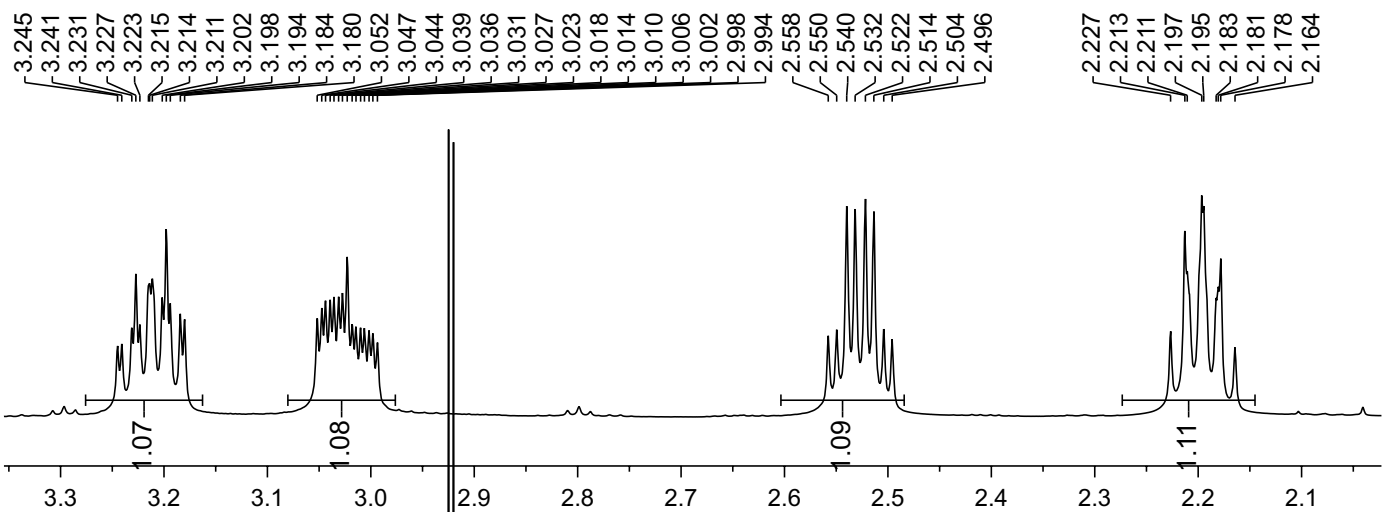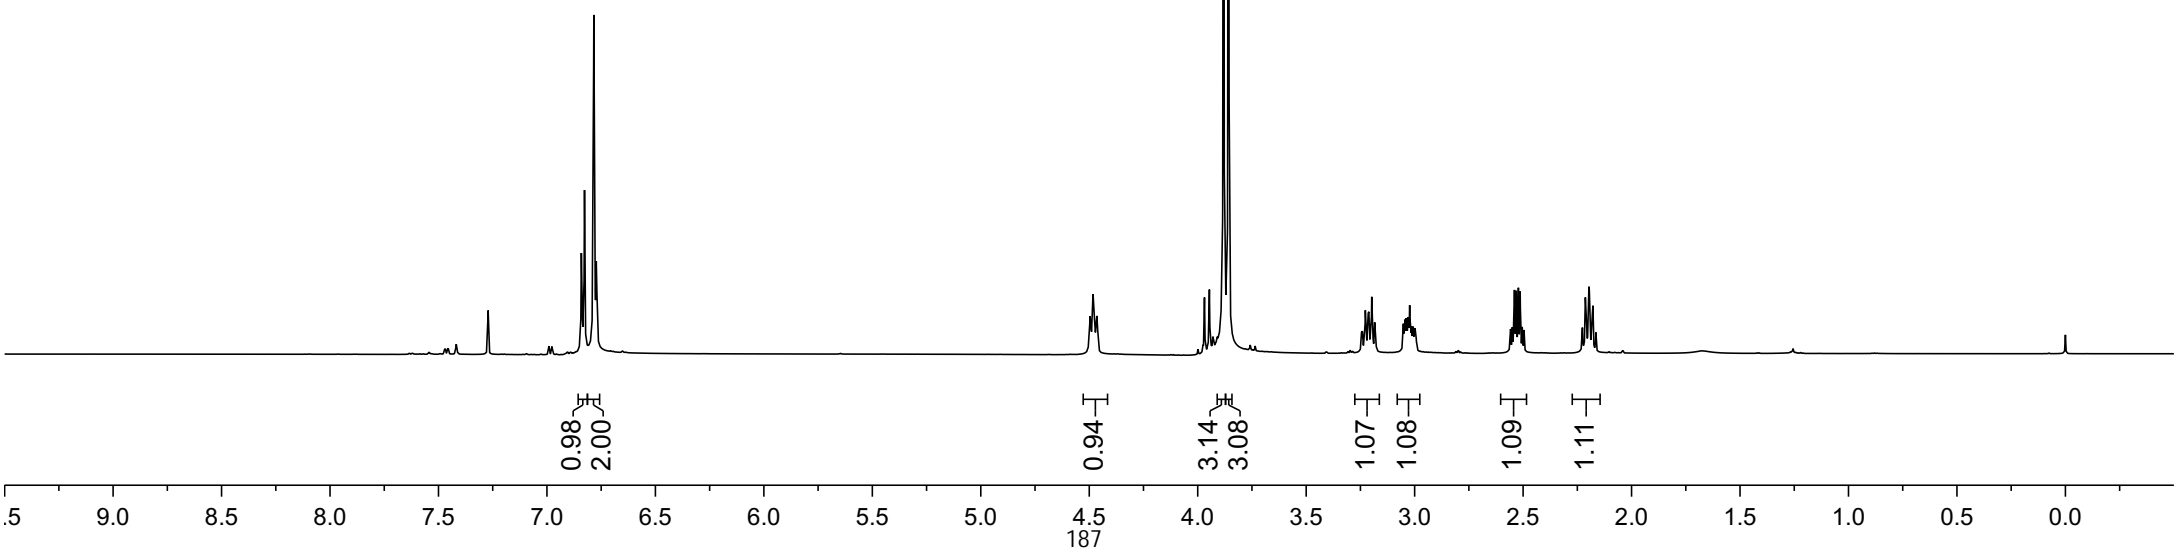



—208.14

148.98  
147.99

—129.11

—118.87

111.26  
110.31

77.21  
77.00  
76.79

—64.04

55.87  
55.81

—44.63

—17.92

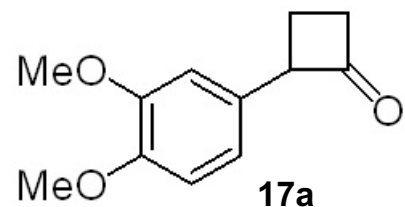

<sup>13</sup>C NMR spectrum (150 MHz, CDCl<sub>3</sub>)

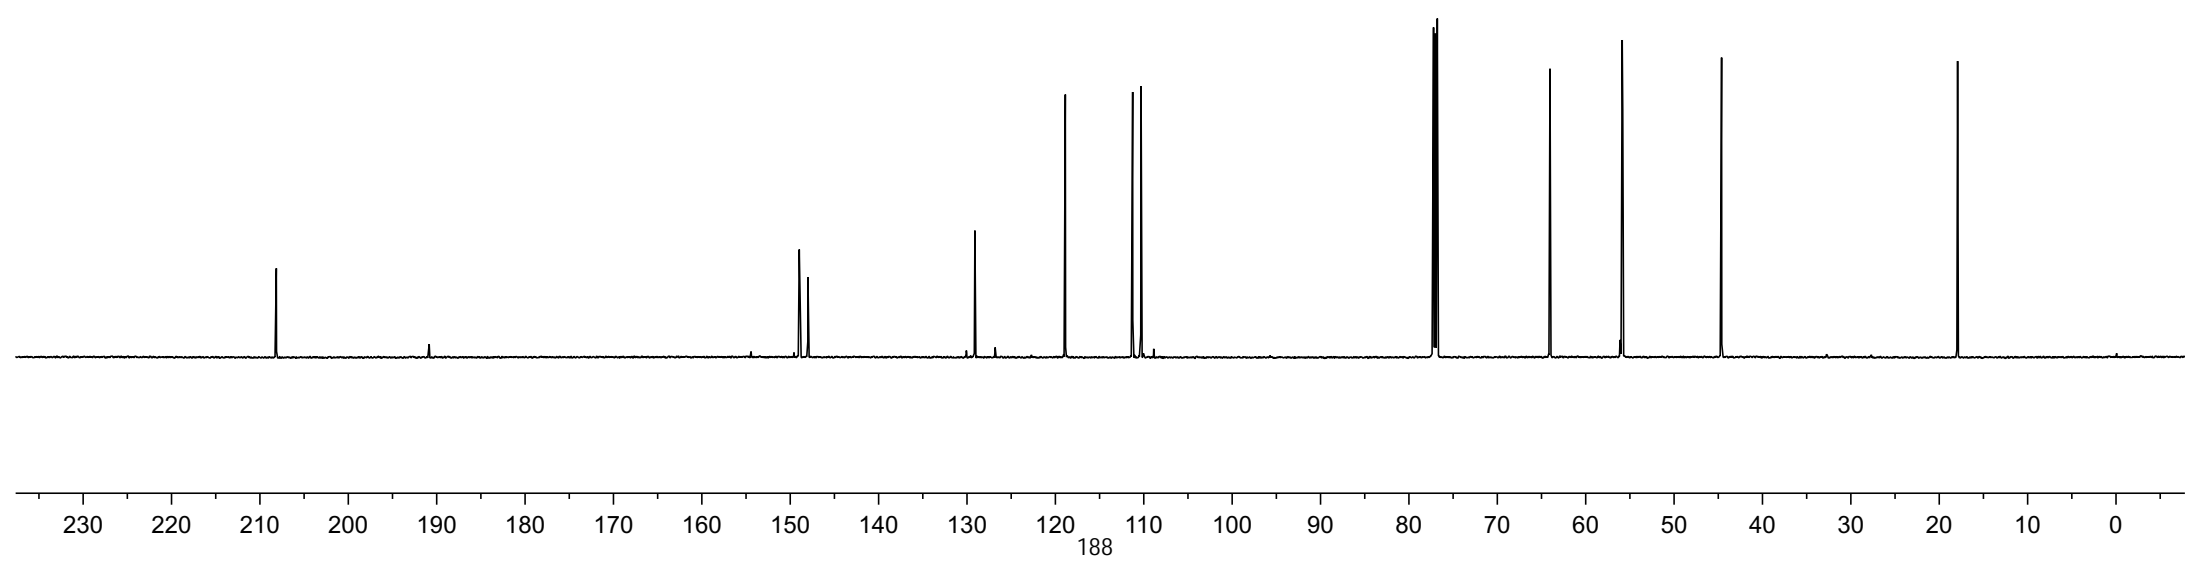

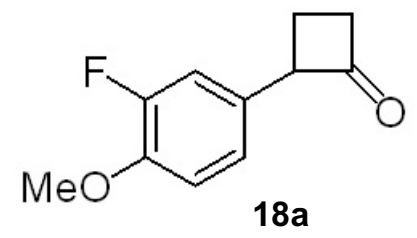

<sup>1</sup>H NMR spectrum (600 MHz, CDCl<sub>3</sub>)

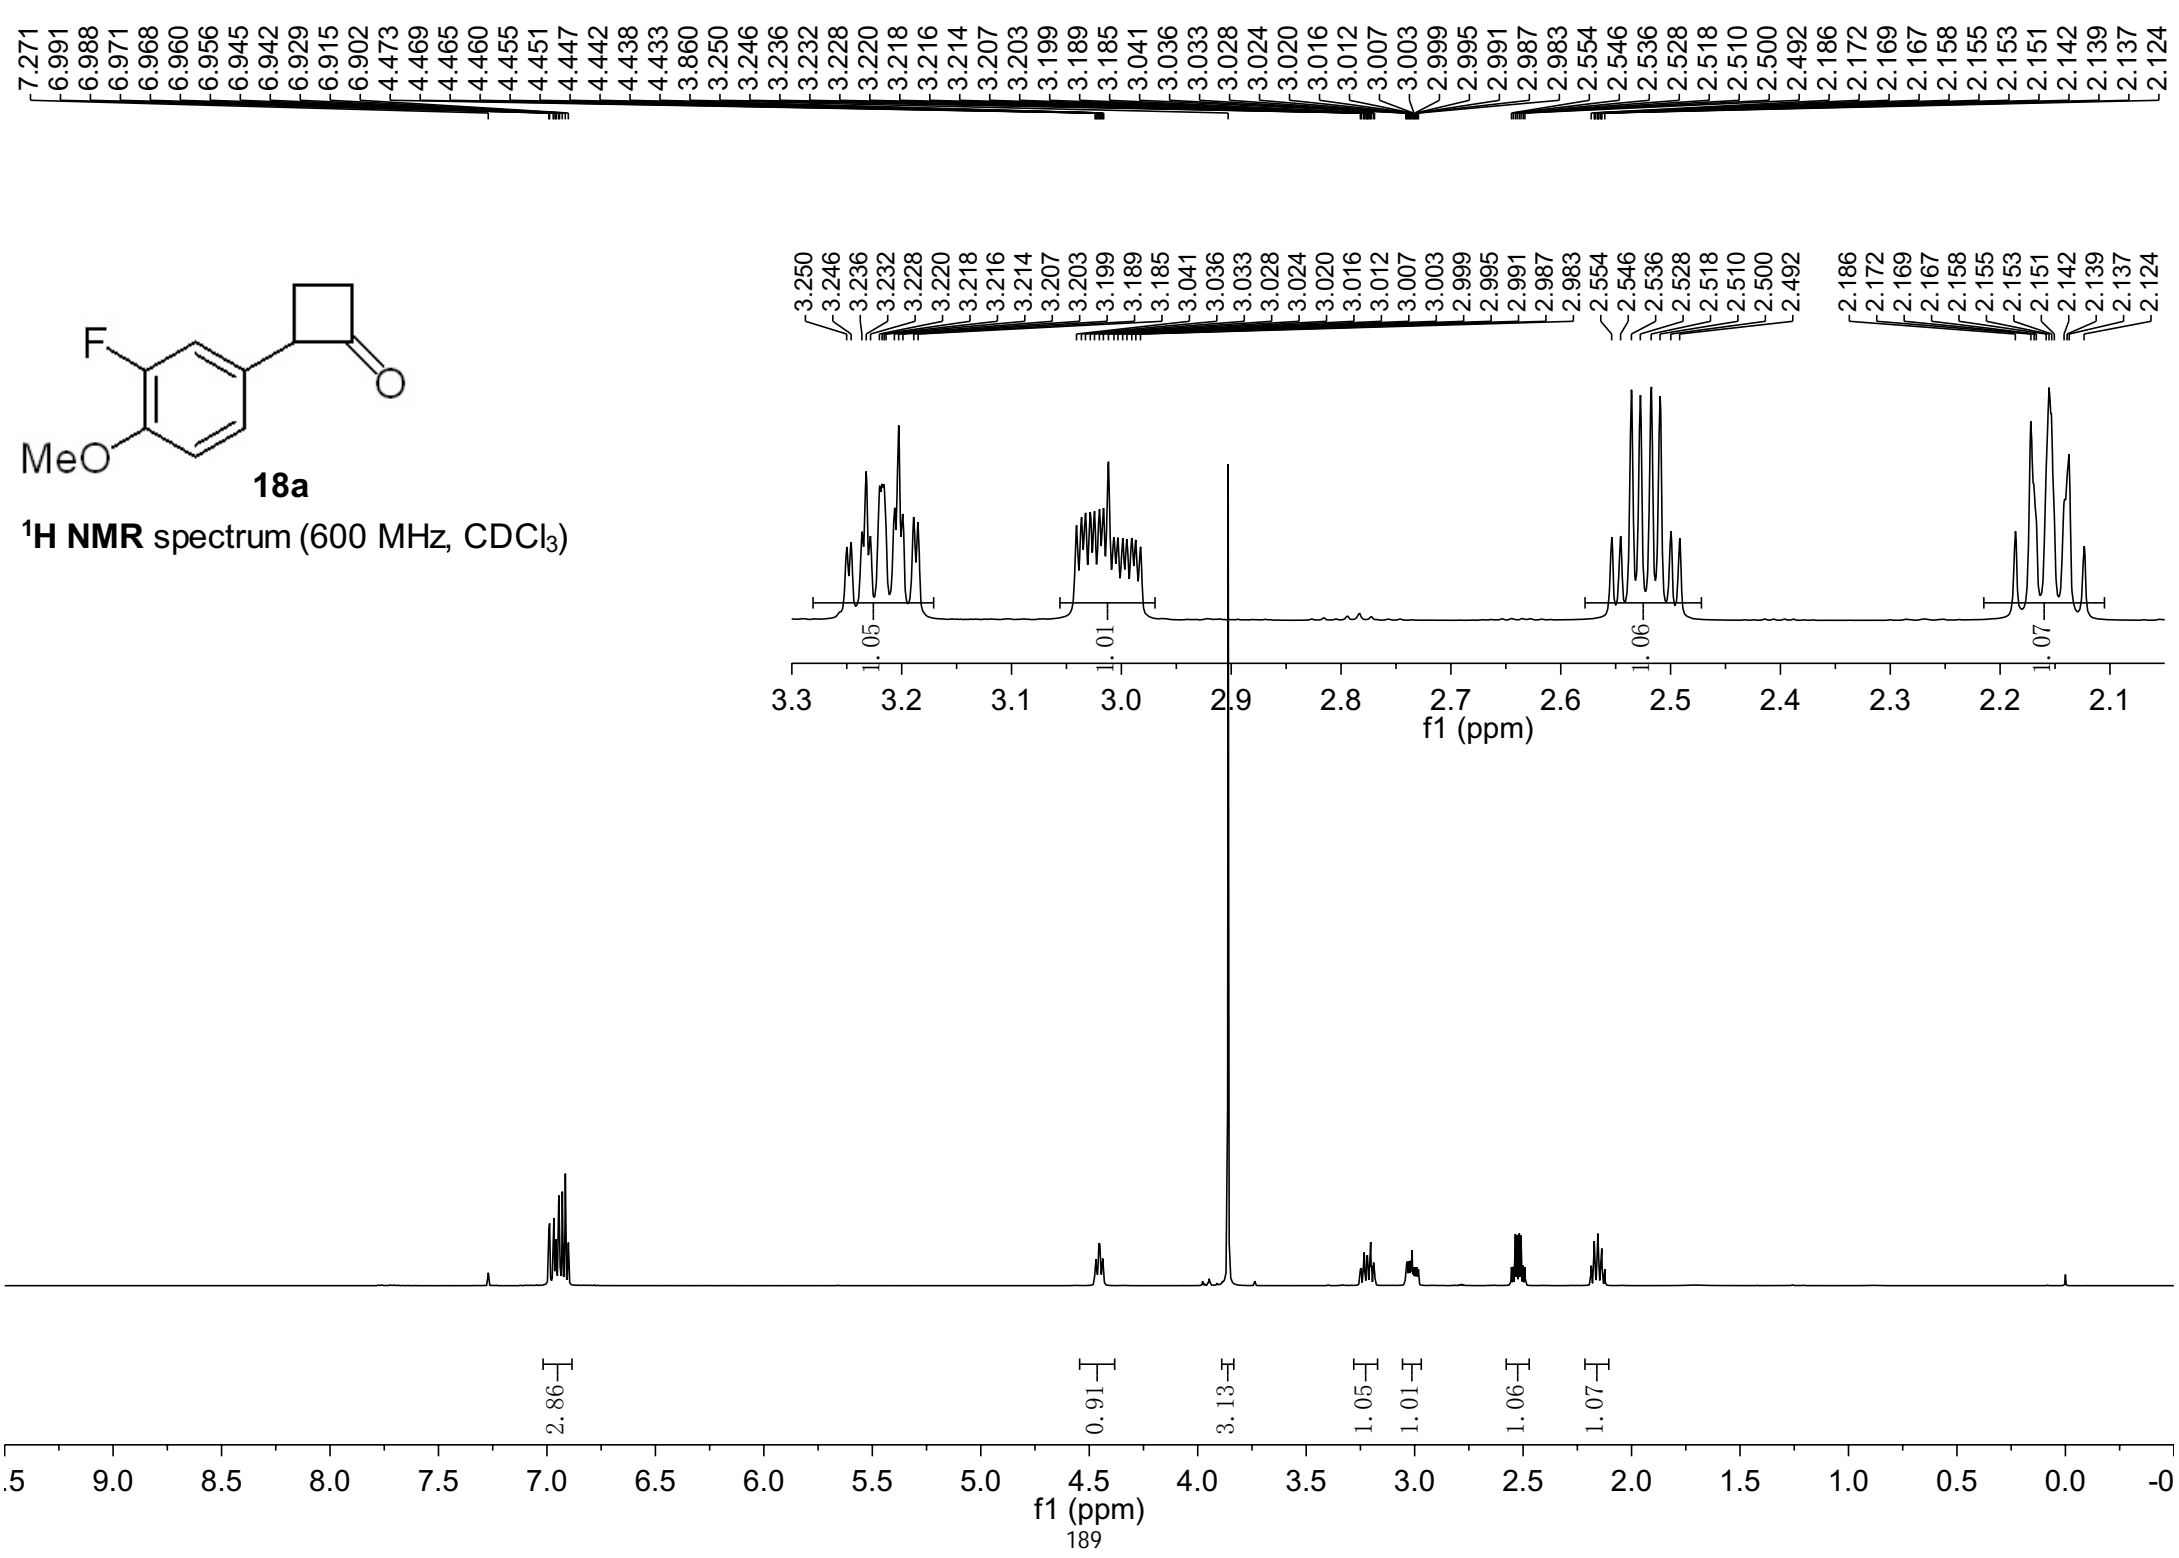

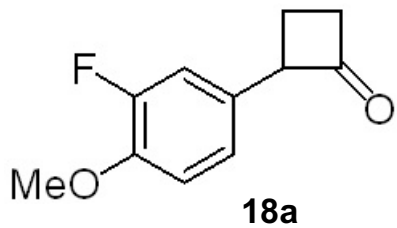

<sup>13</sup>C NMR spectrum (150 MHz, CDCl<sub>3</sub>)

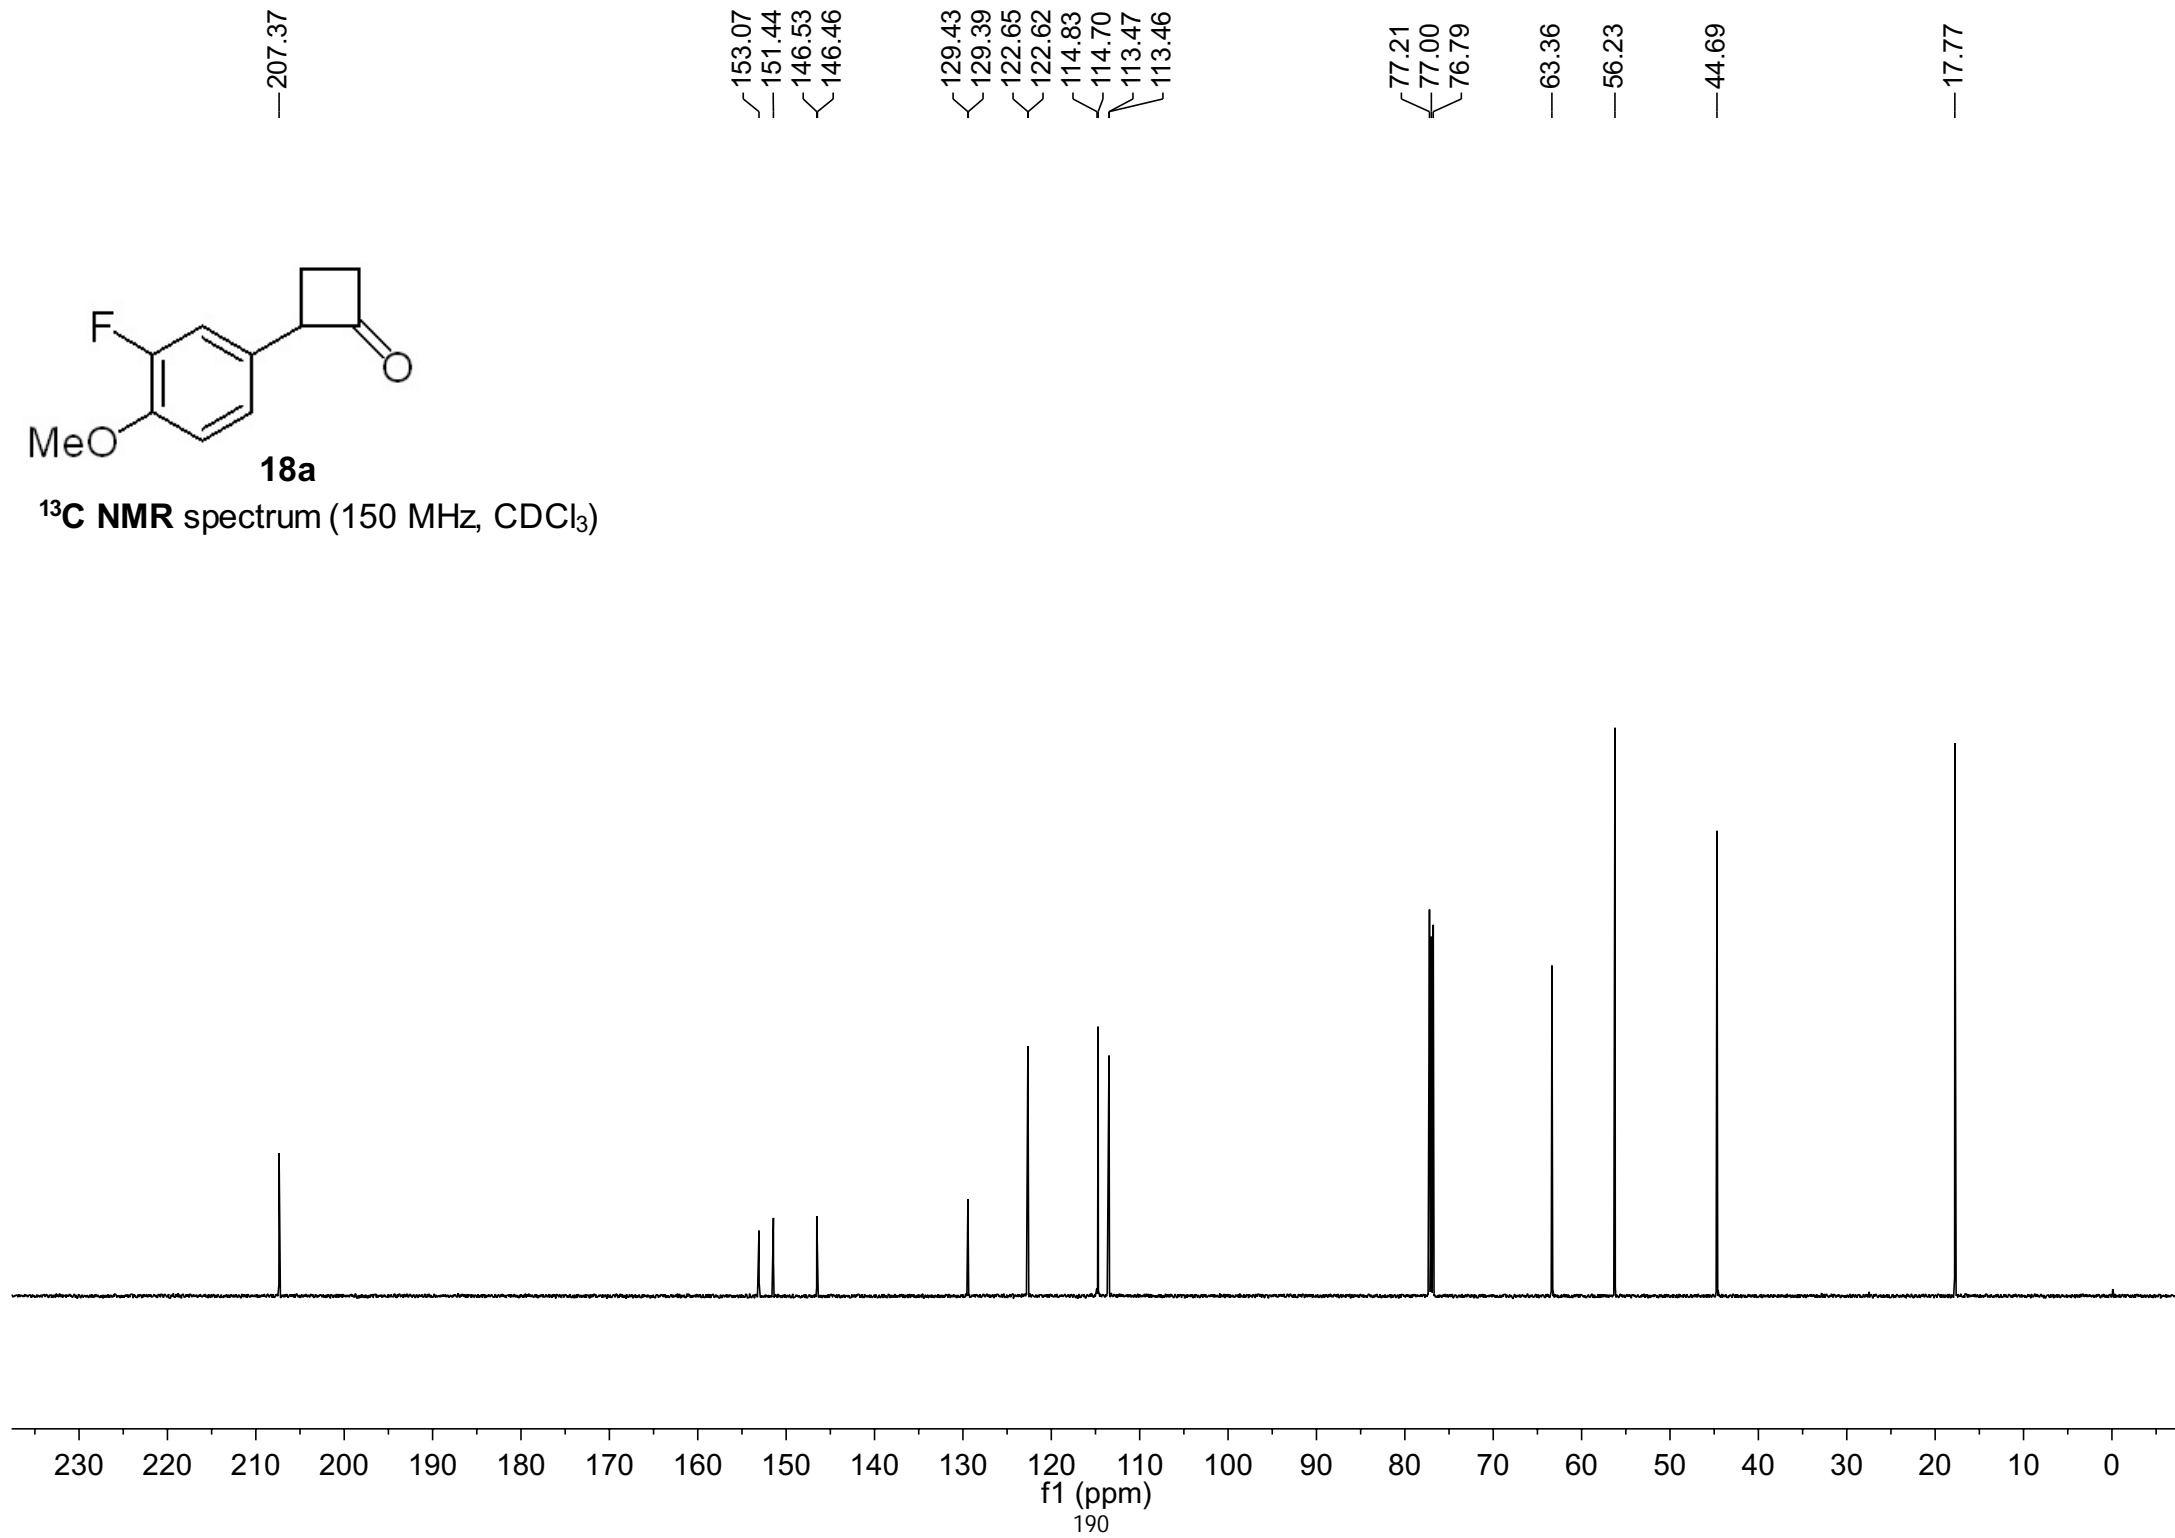

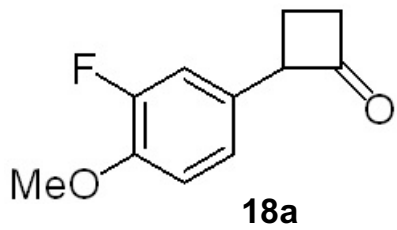

<sup>19</sup>F NMR spectrum (376 MHz, CDCl<sub>3</sub>)

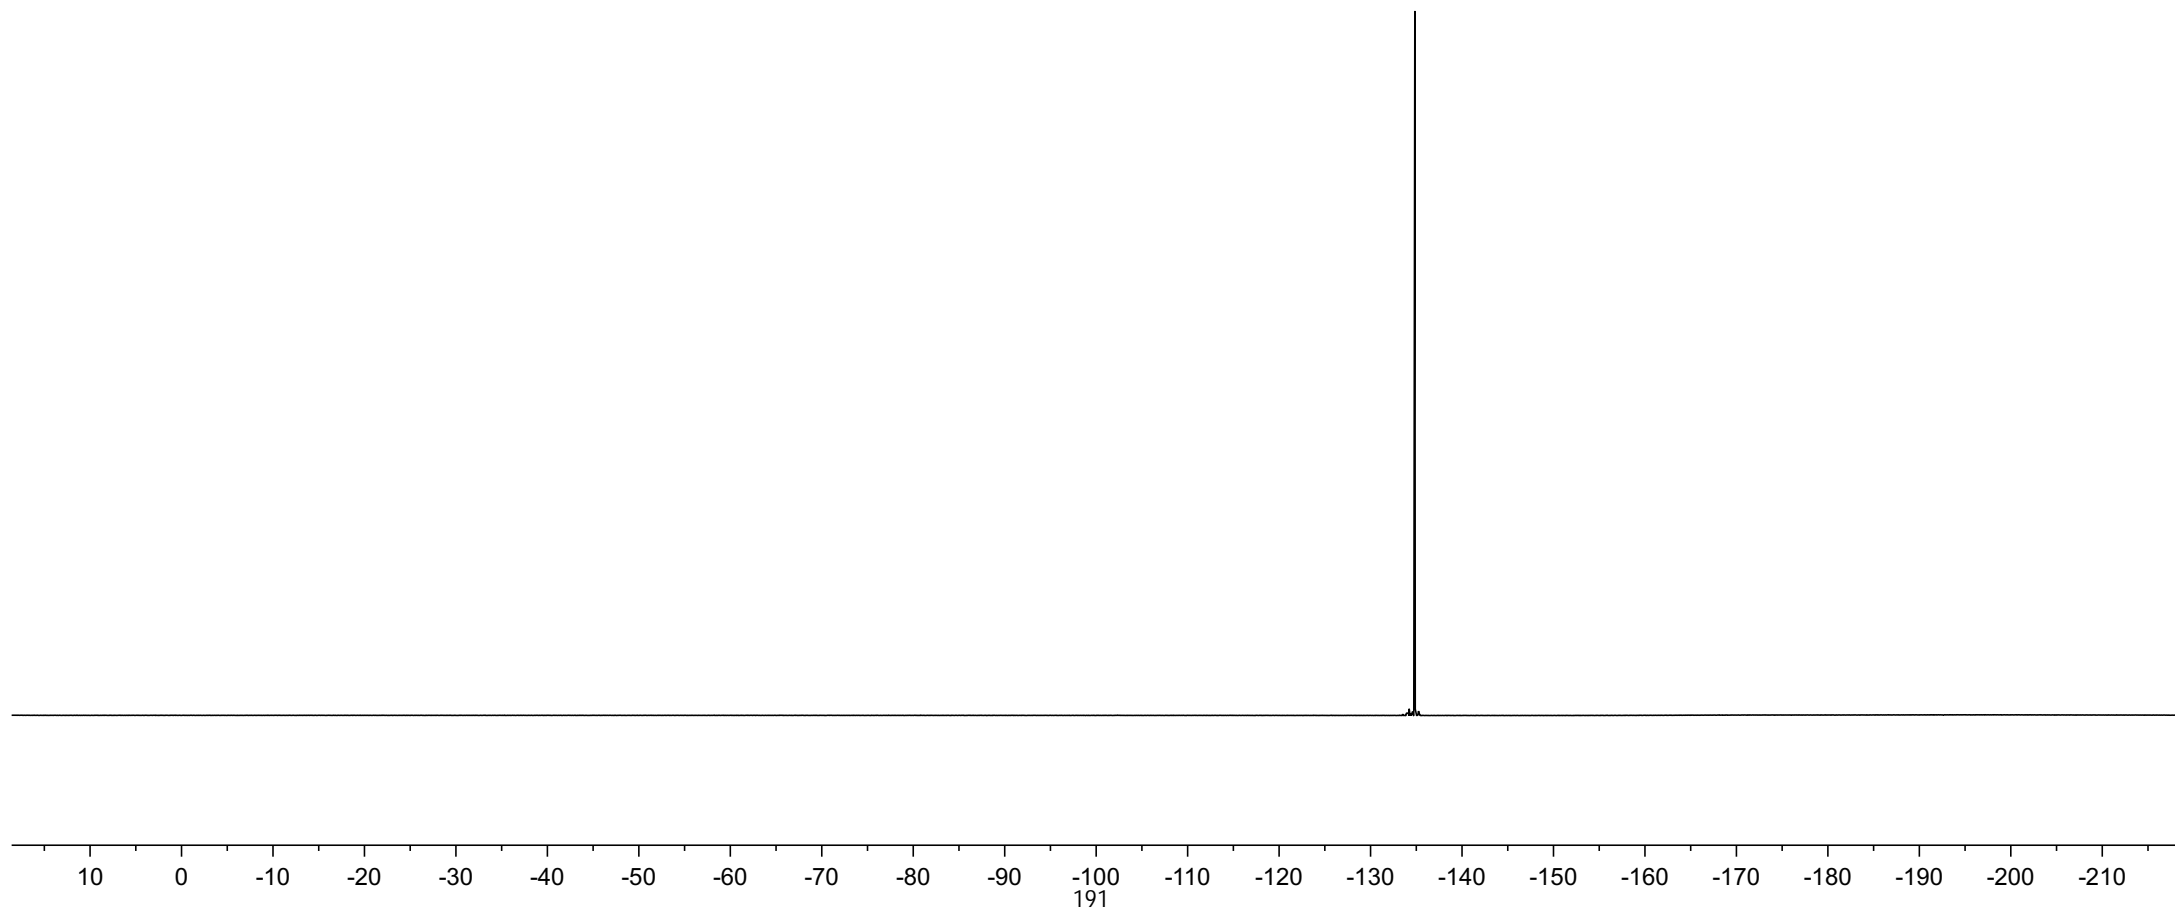

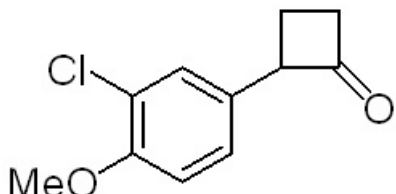

**19a**

<sup>1</sup>H NMR spectrum (600 MHz, CDCl<sub>3</sub>)

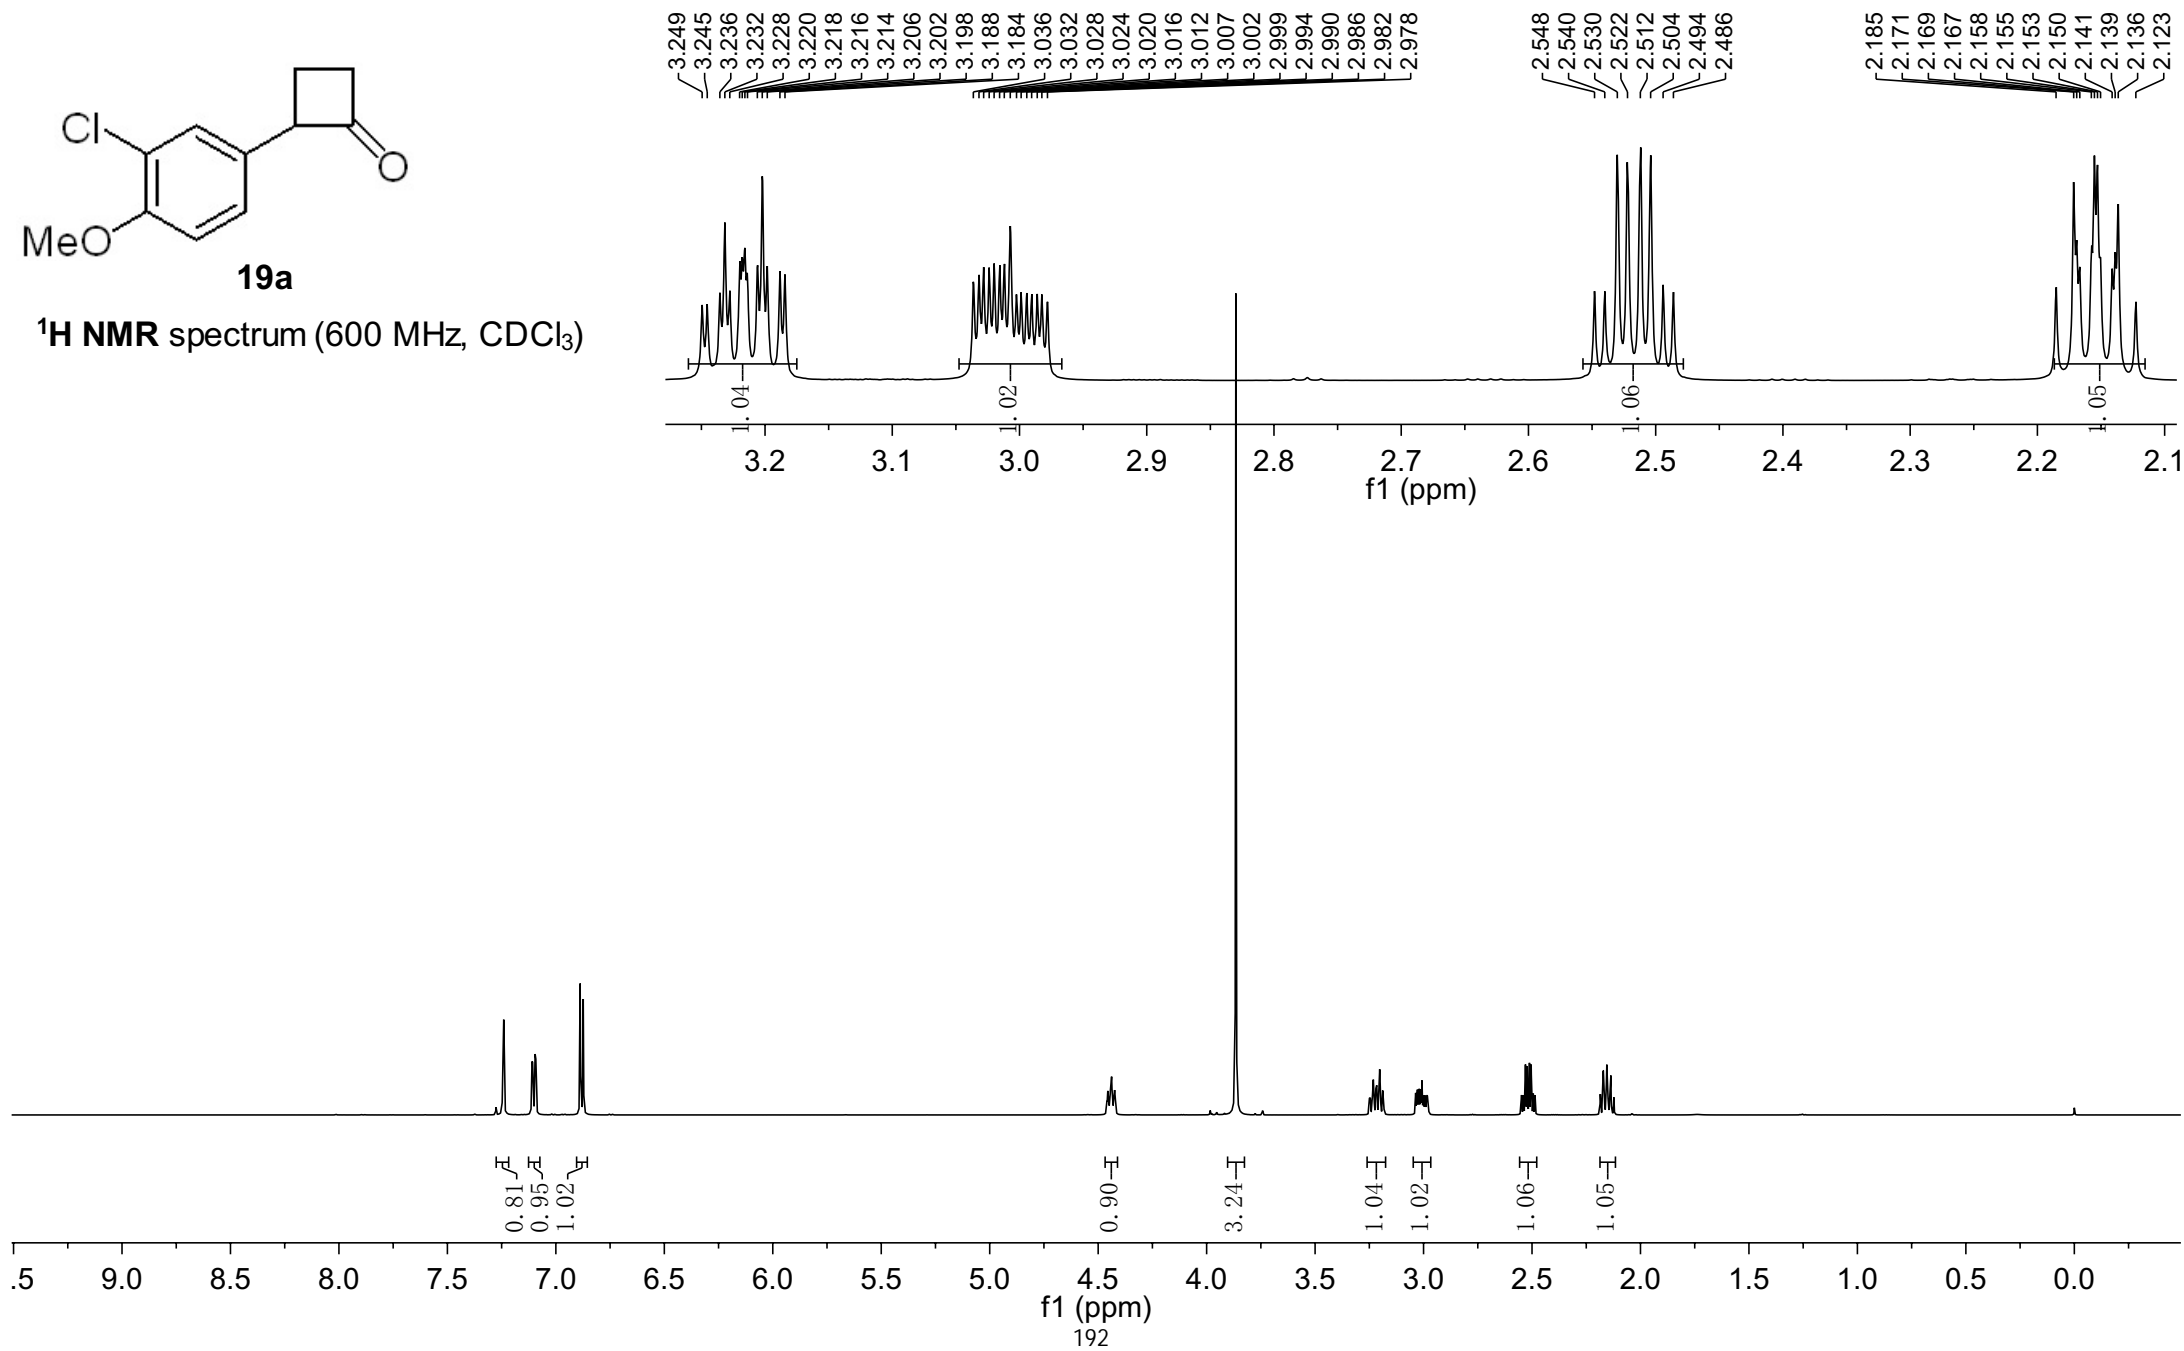

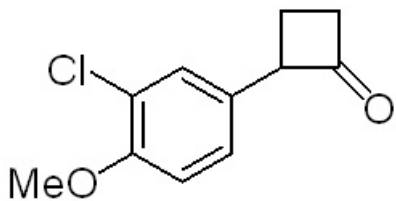

**19a**

<sup>13</sup>C NMR spectrum (150 MHz, CDCl<sub>3</sub>)

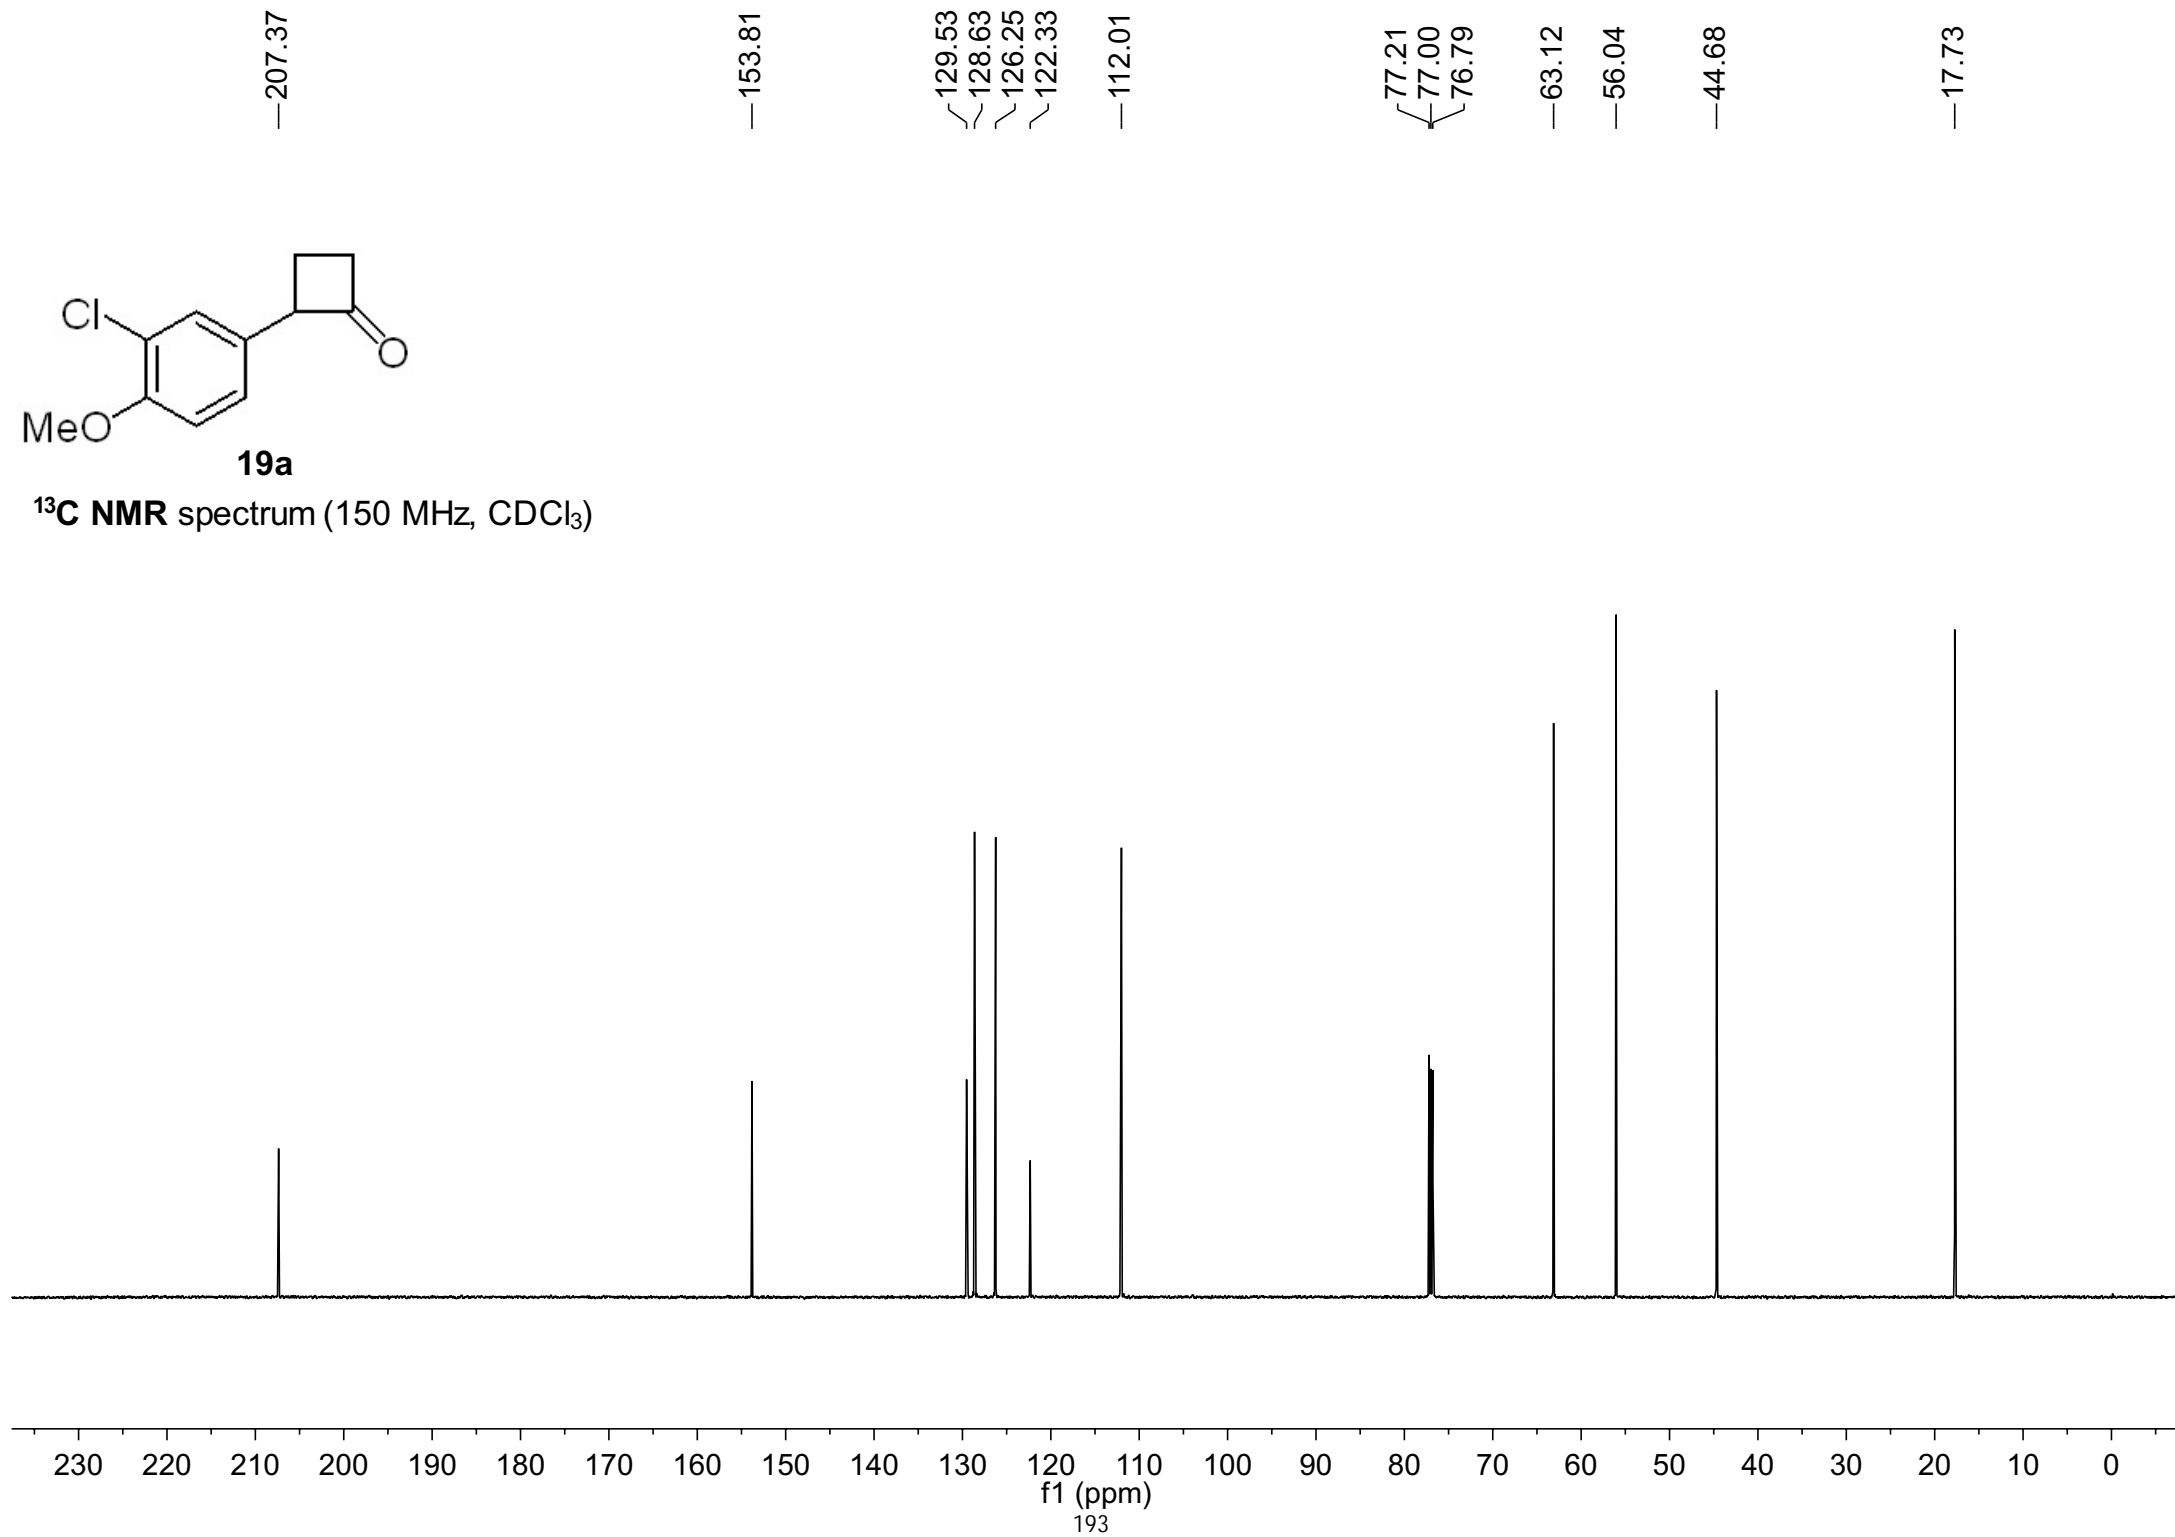

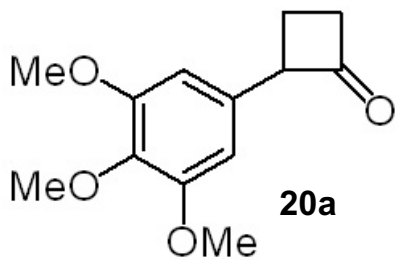

<sup>1</sup>H NMR spectrum (600 MHz, CDCl<sub>3</sub>)

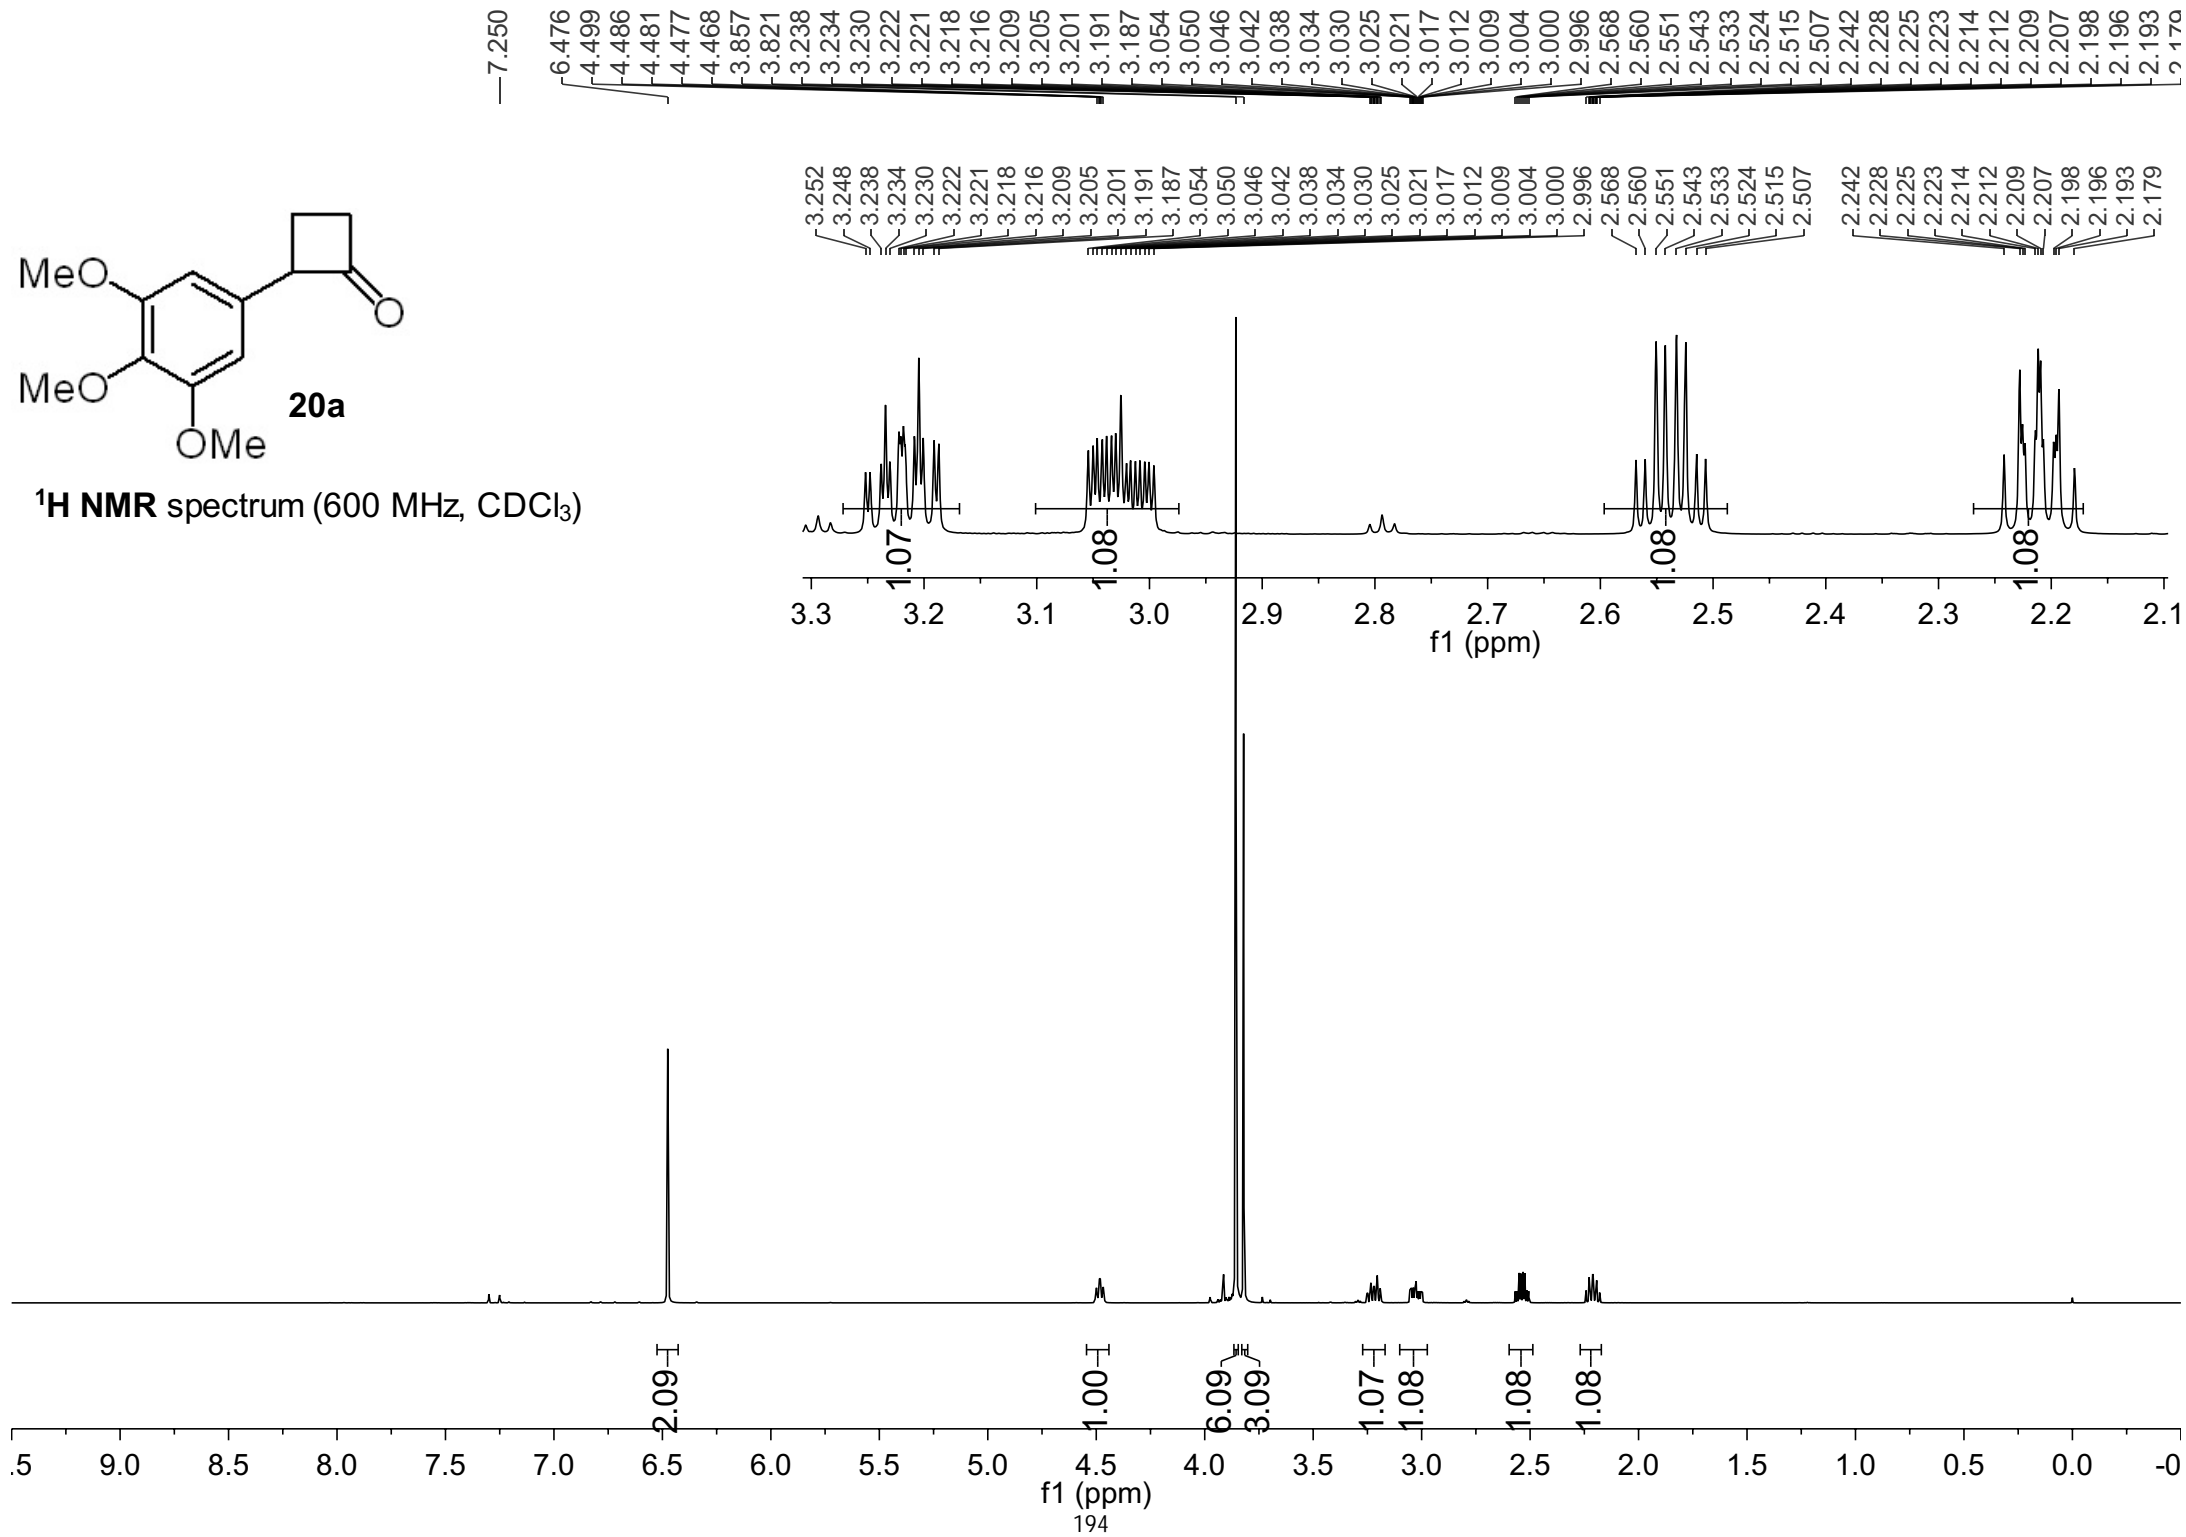

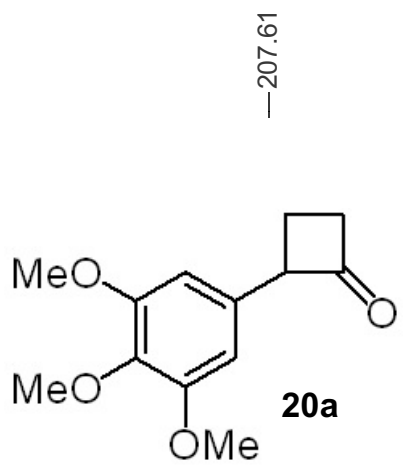

—207.61  
—153.16  
—136.78  
—132.03  
—103.80  
77.21  
77.00  
76.79  
64.24  
60.62  
55.93  
—44.50  
—17.76

<sup>13</sup>C NMR spectrum (150 MHz, CDCl<sub>3</sub>)

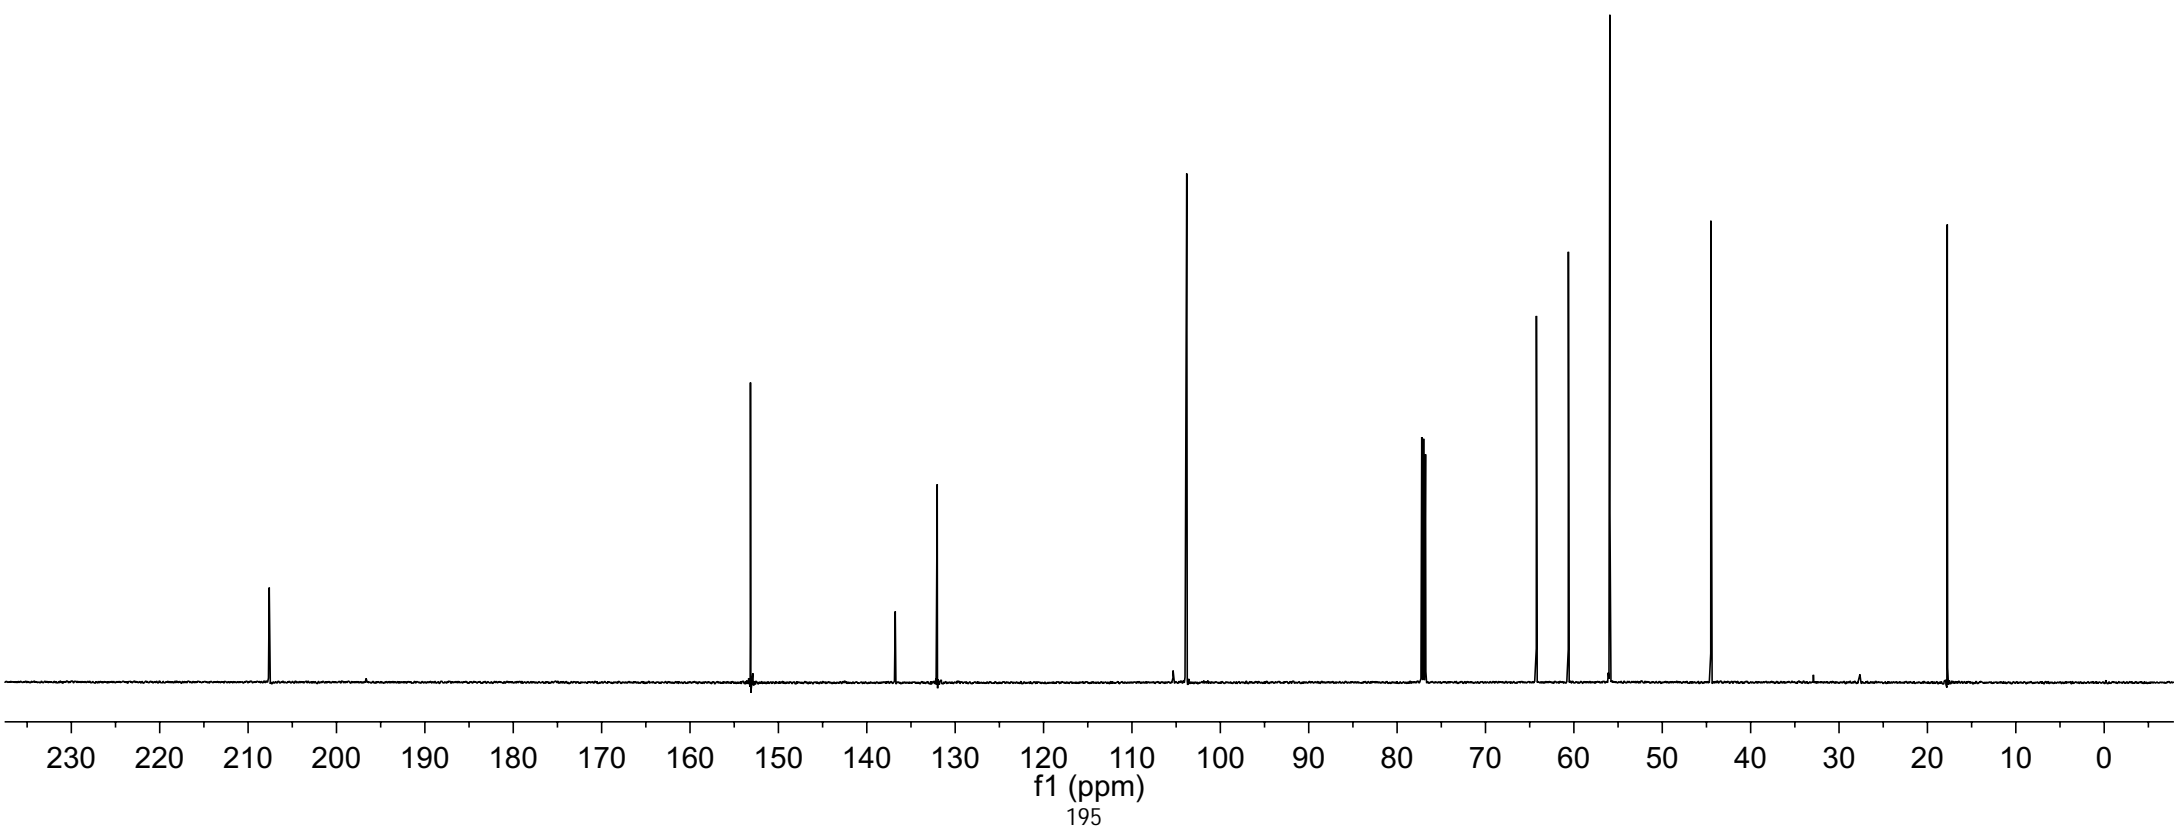



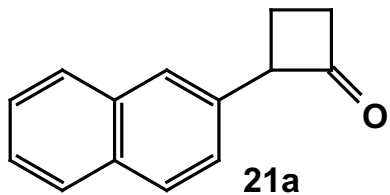

<sup>1</sup>H NMR spectrum (400 MHz, CDCl<sub>3</sub>)

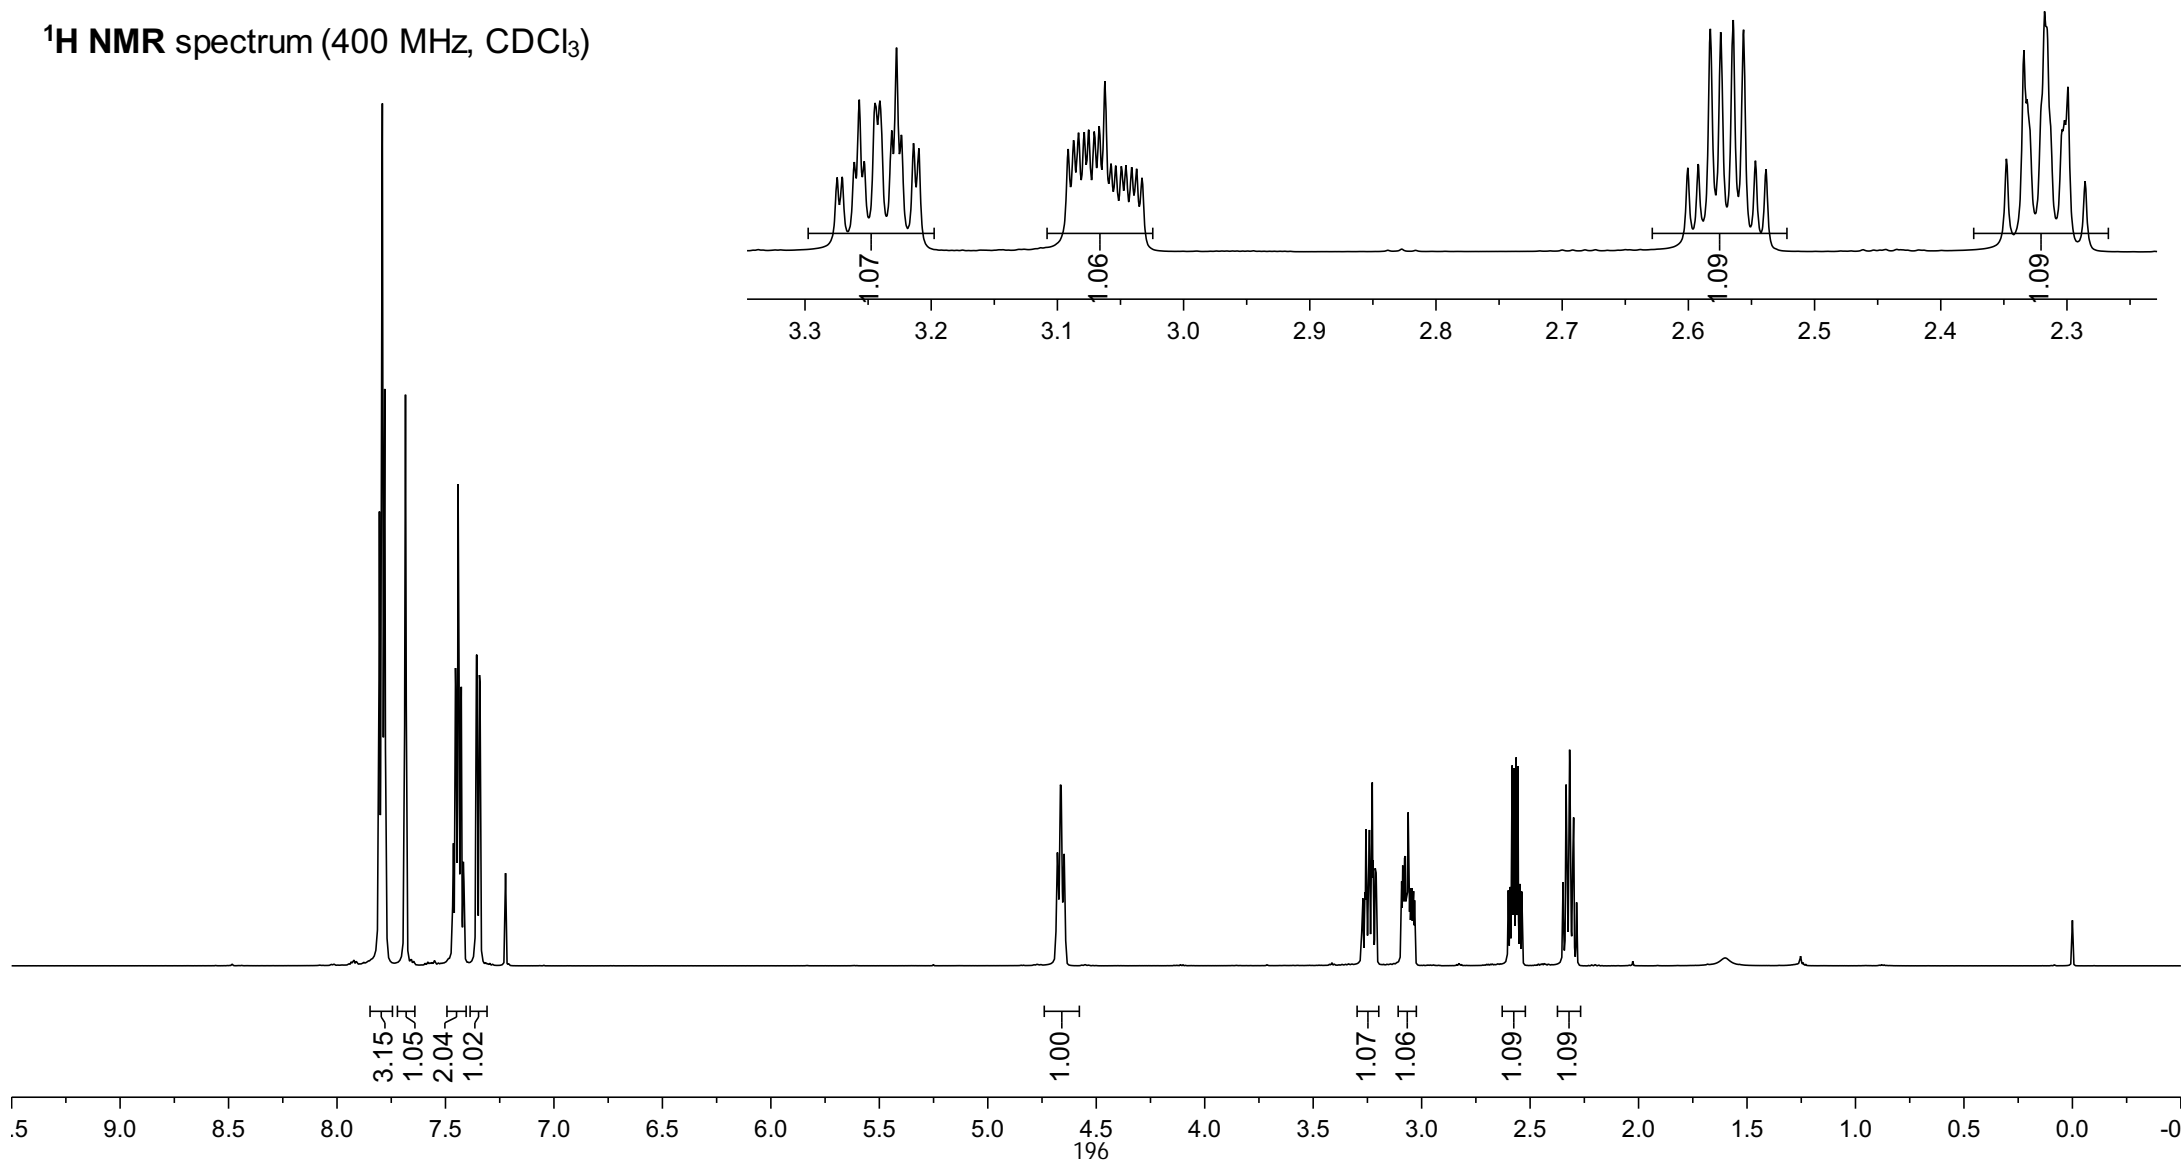

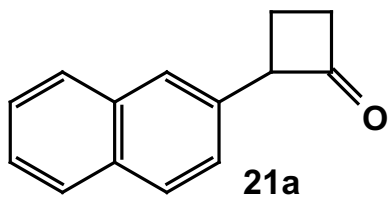

<sup>13</sup>C NMR spectrum (100 MHz, CDCl<sub>3</sub>)

—207.77

133.89  
133.33  
132.37  
128.33  
127.67  
127.58  
126.15  
125.70  
125.31  
125.27

77.21  
77.00  
76.79

—64.58

—44.86

—17.65

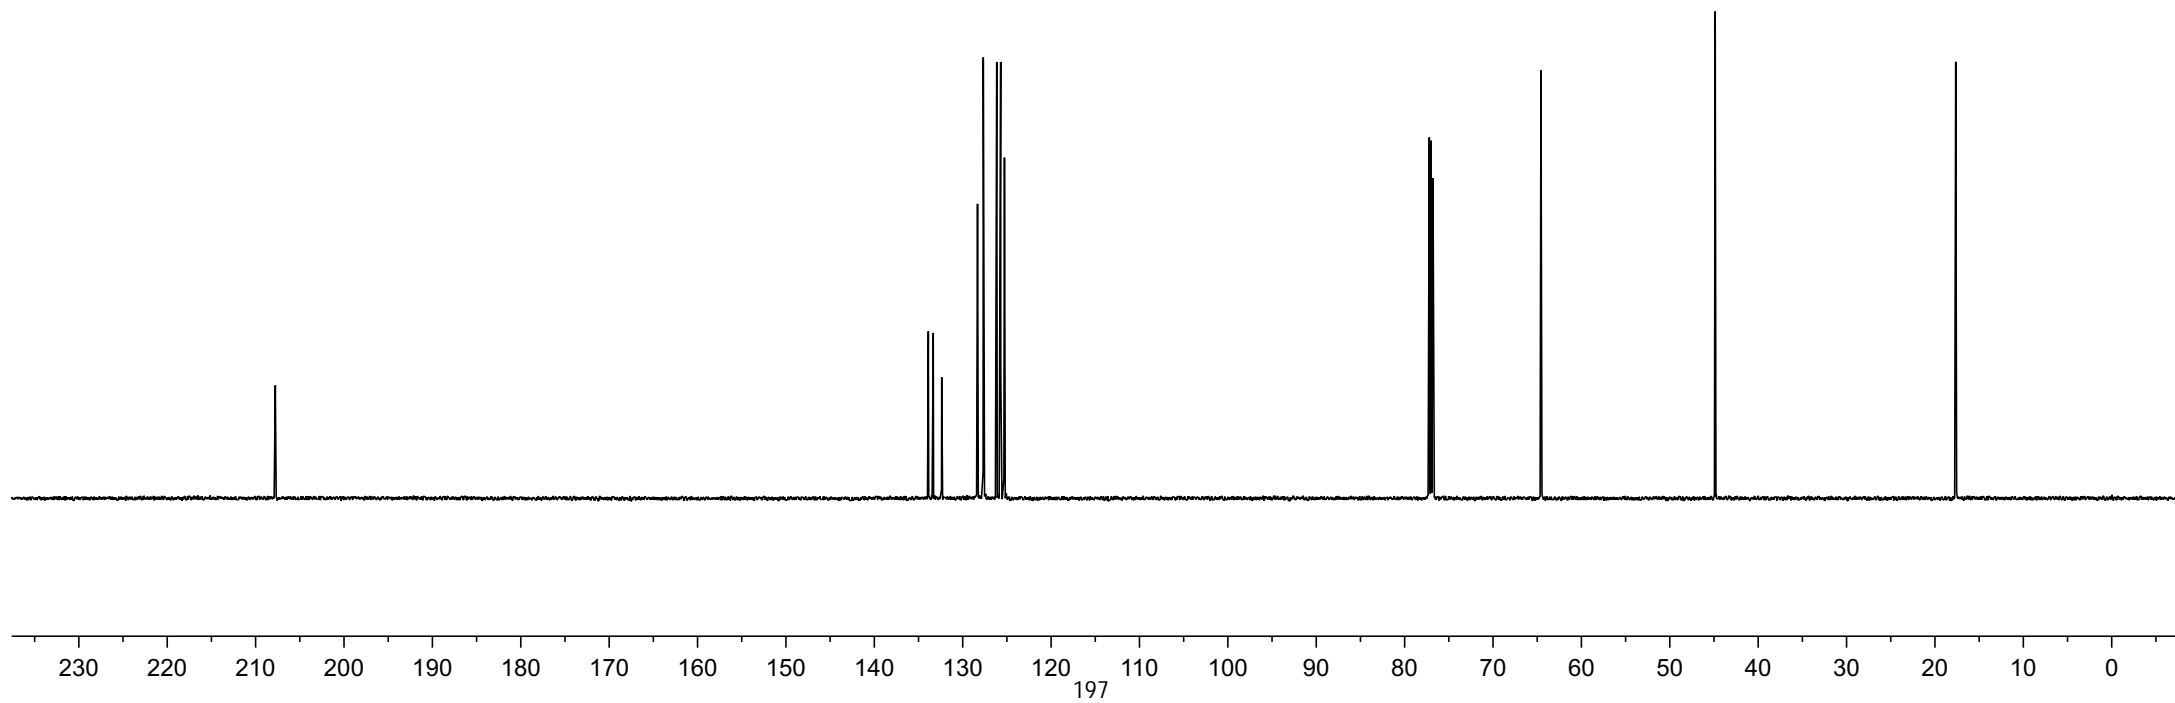

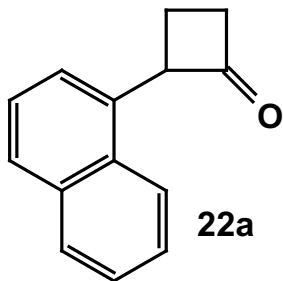

<sup>1</sup>H NMR spectrum (400 MHz, CDCl<sub>3</sub>)

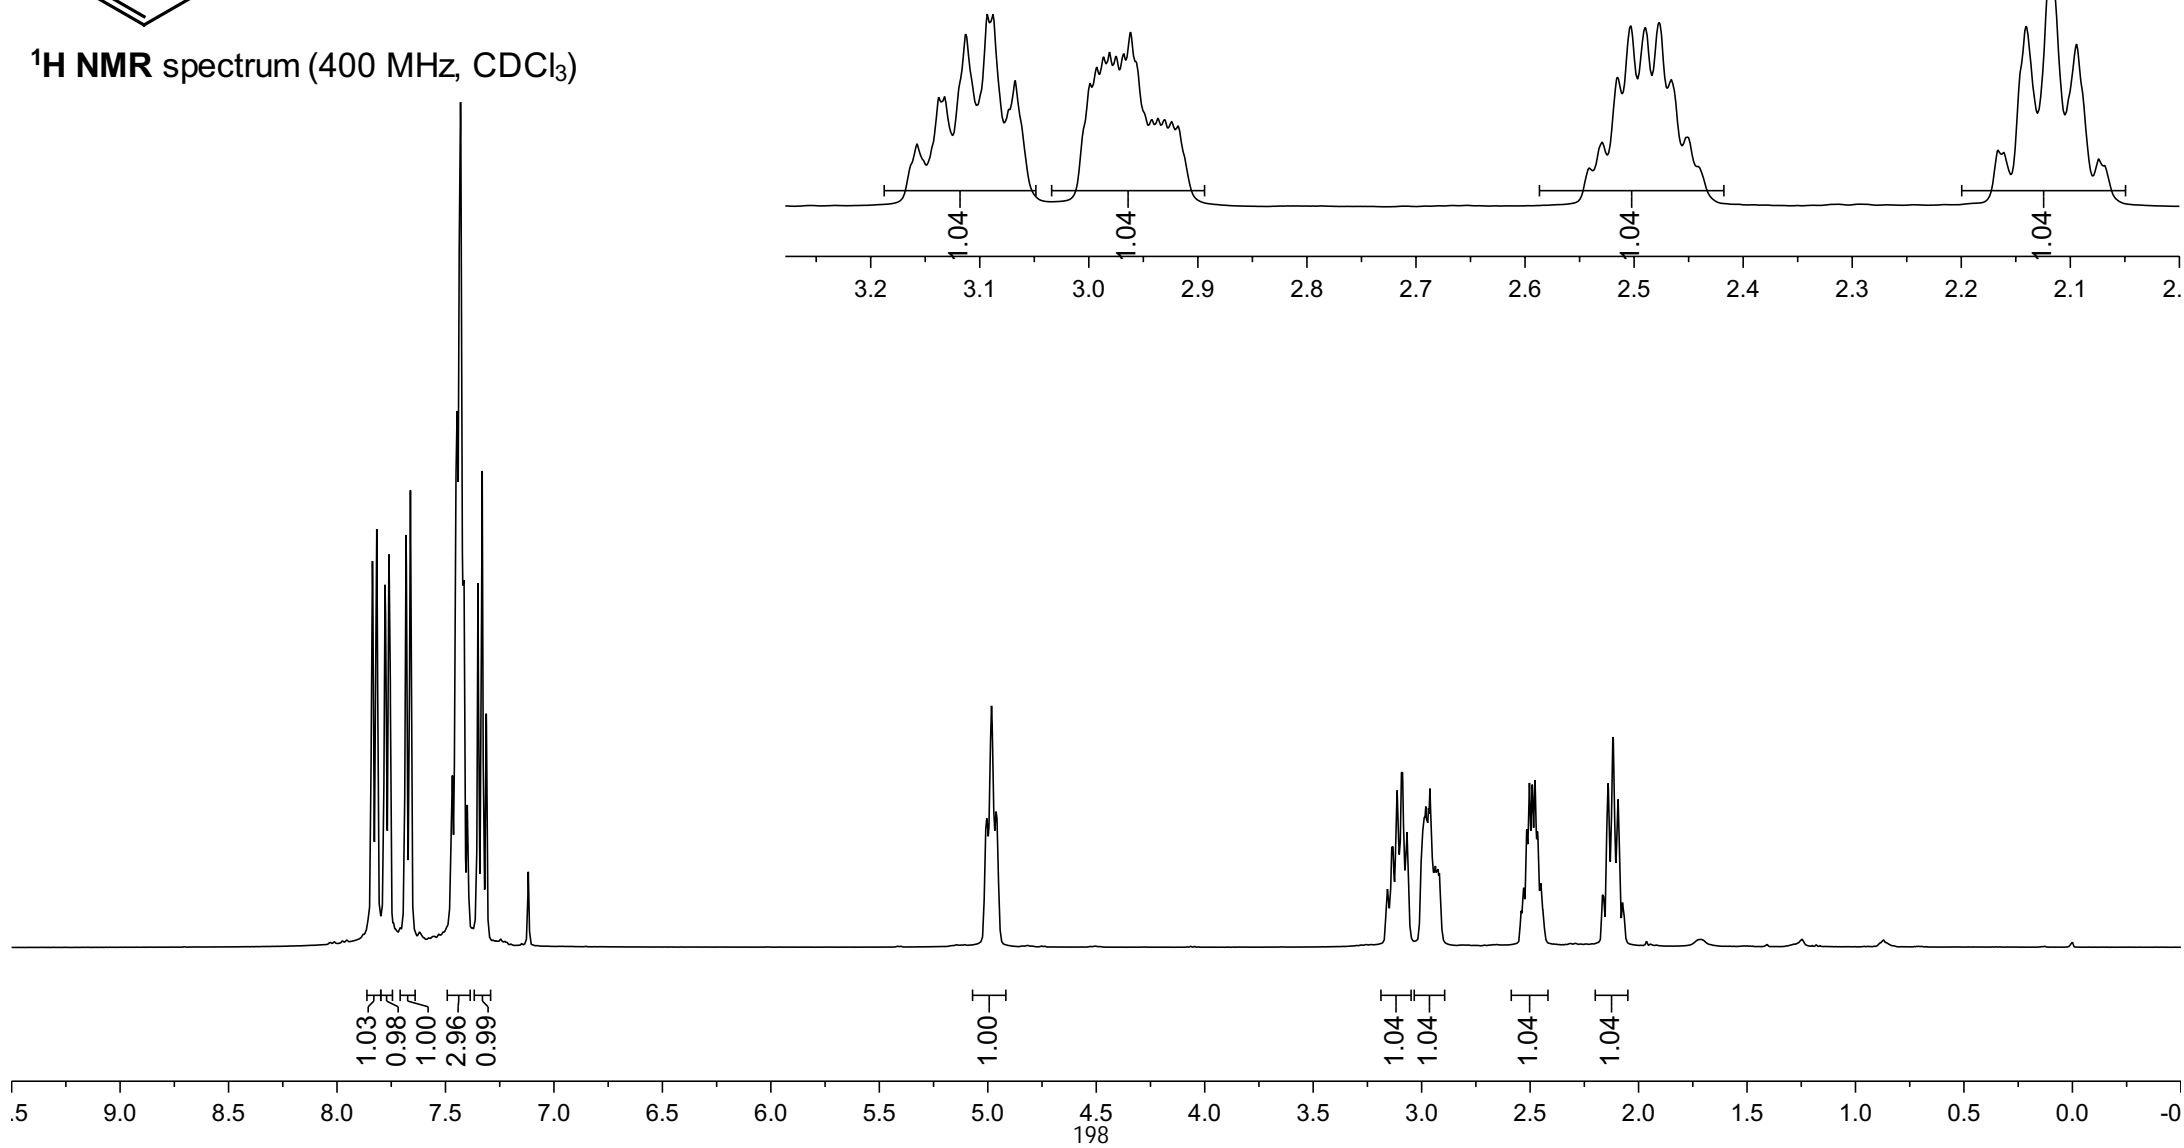

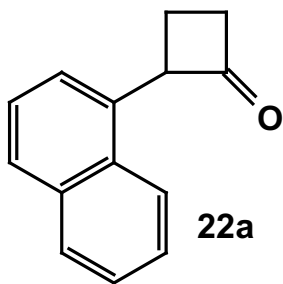

<sup>13</sup>C NMR spectrum (100 MHz, CDCl<sub>3</sub>)

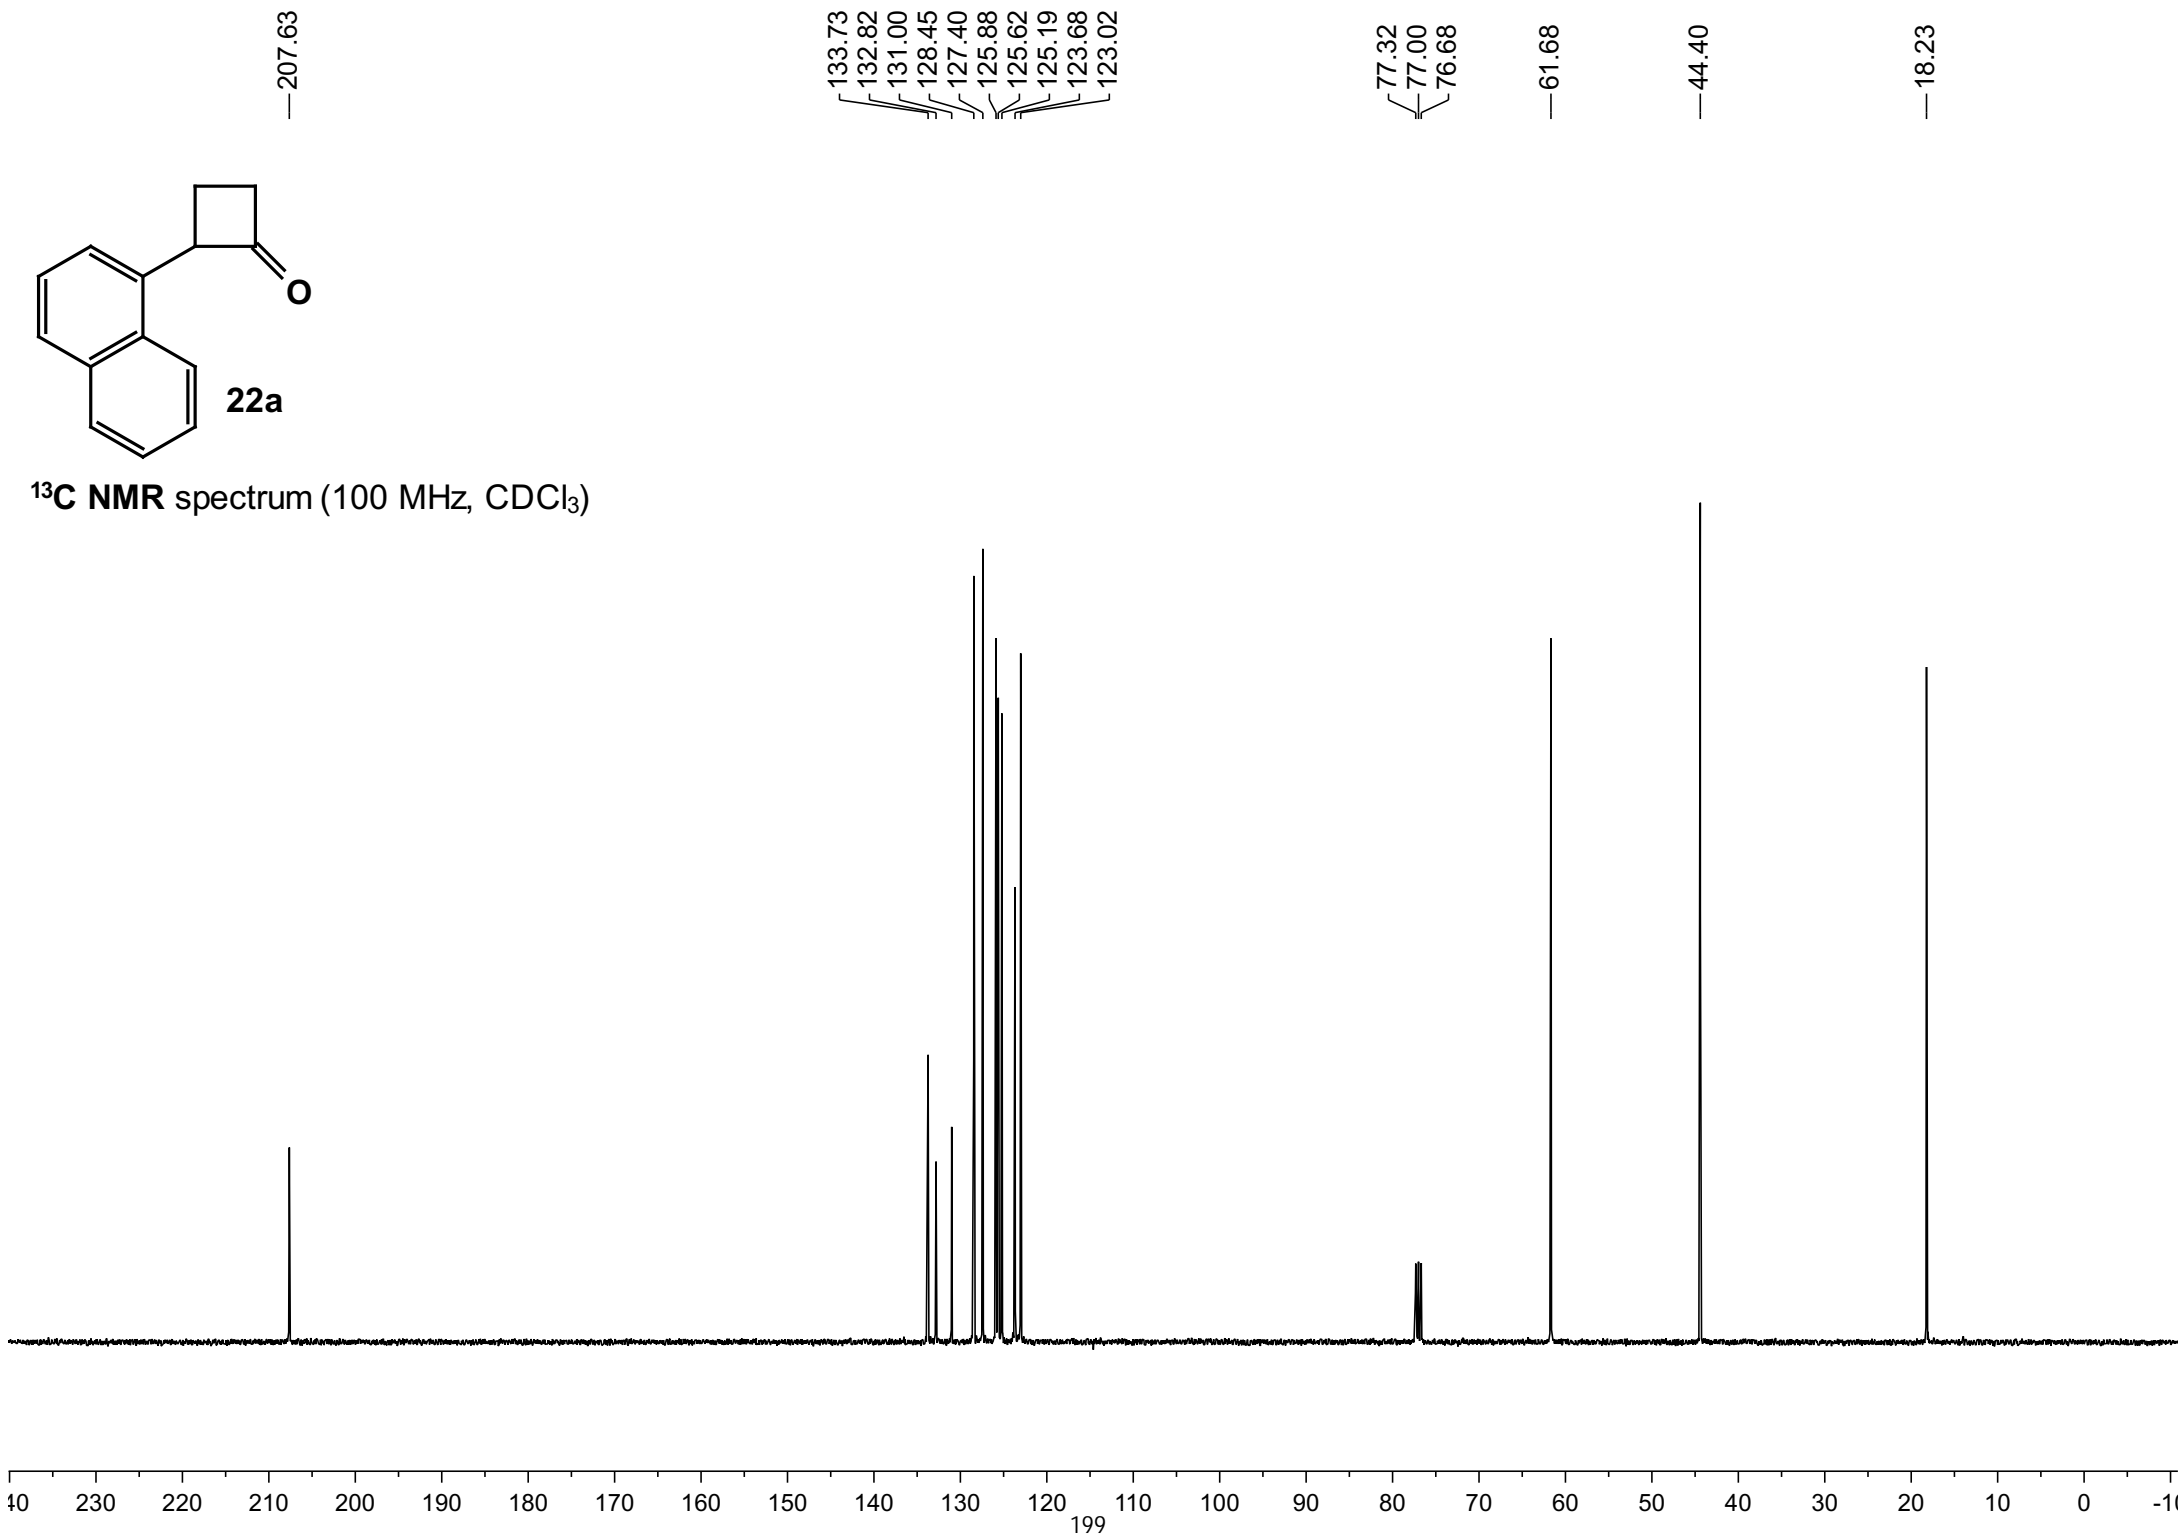

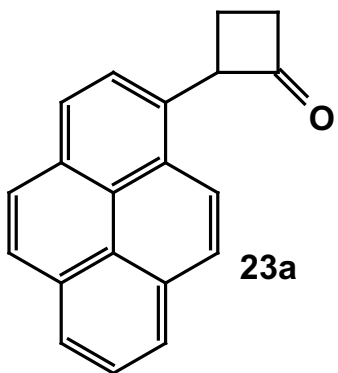

<sup>1</sup>H NMR spectrum (400 MHz, CDCl<sub>3</sub>)

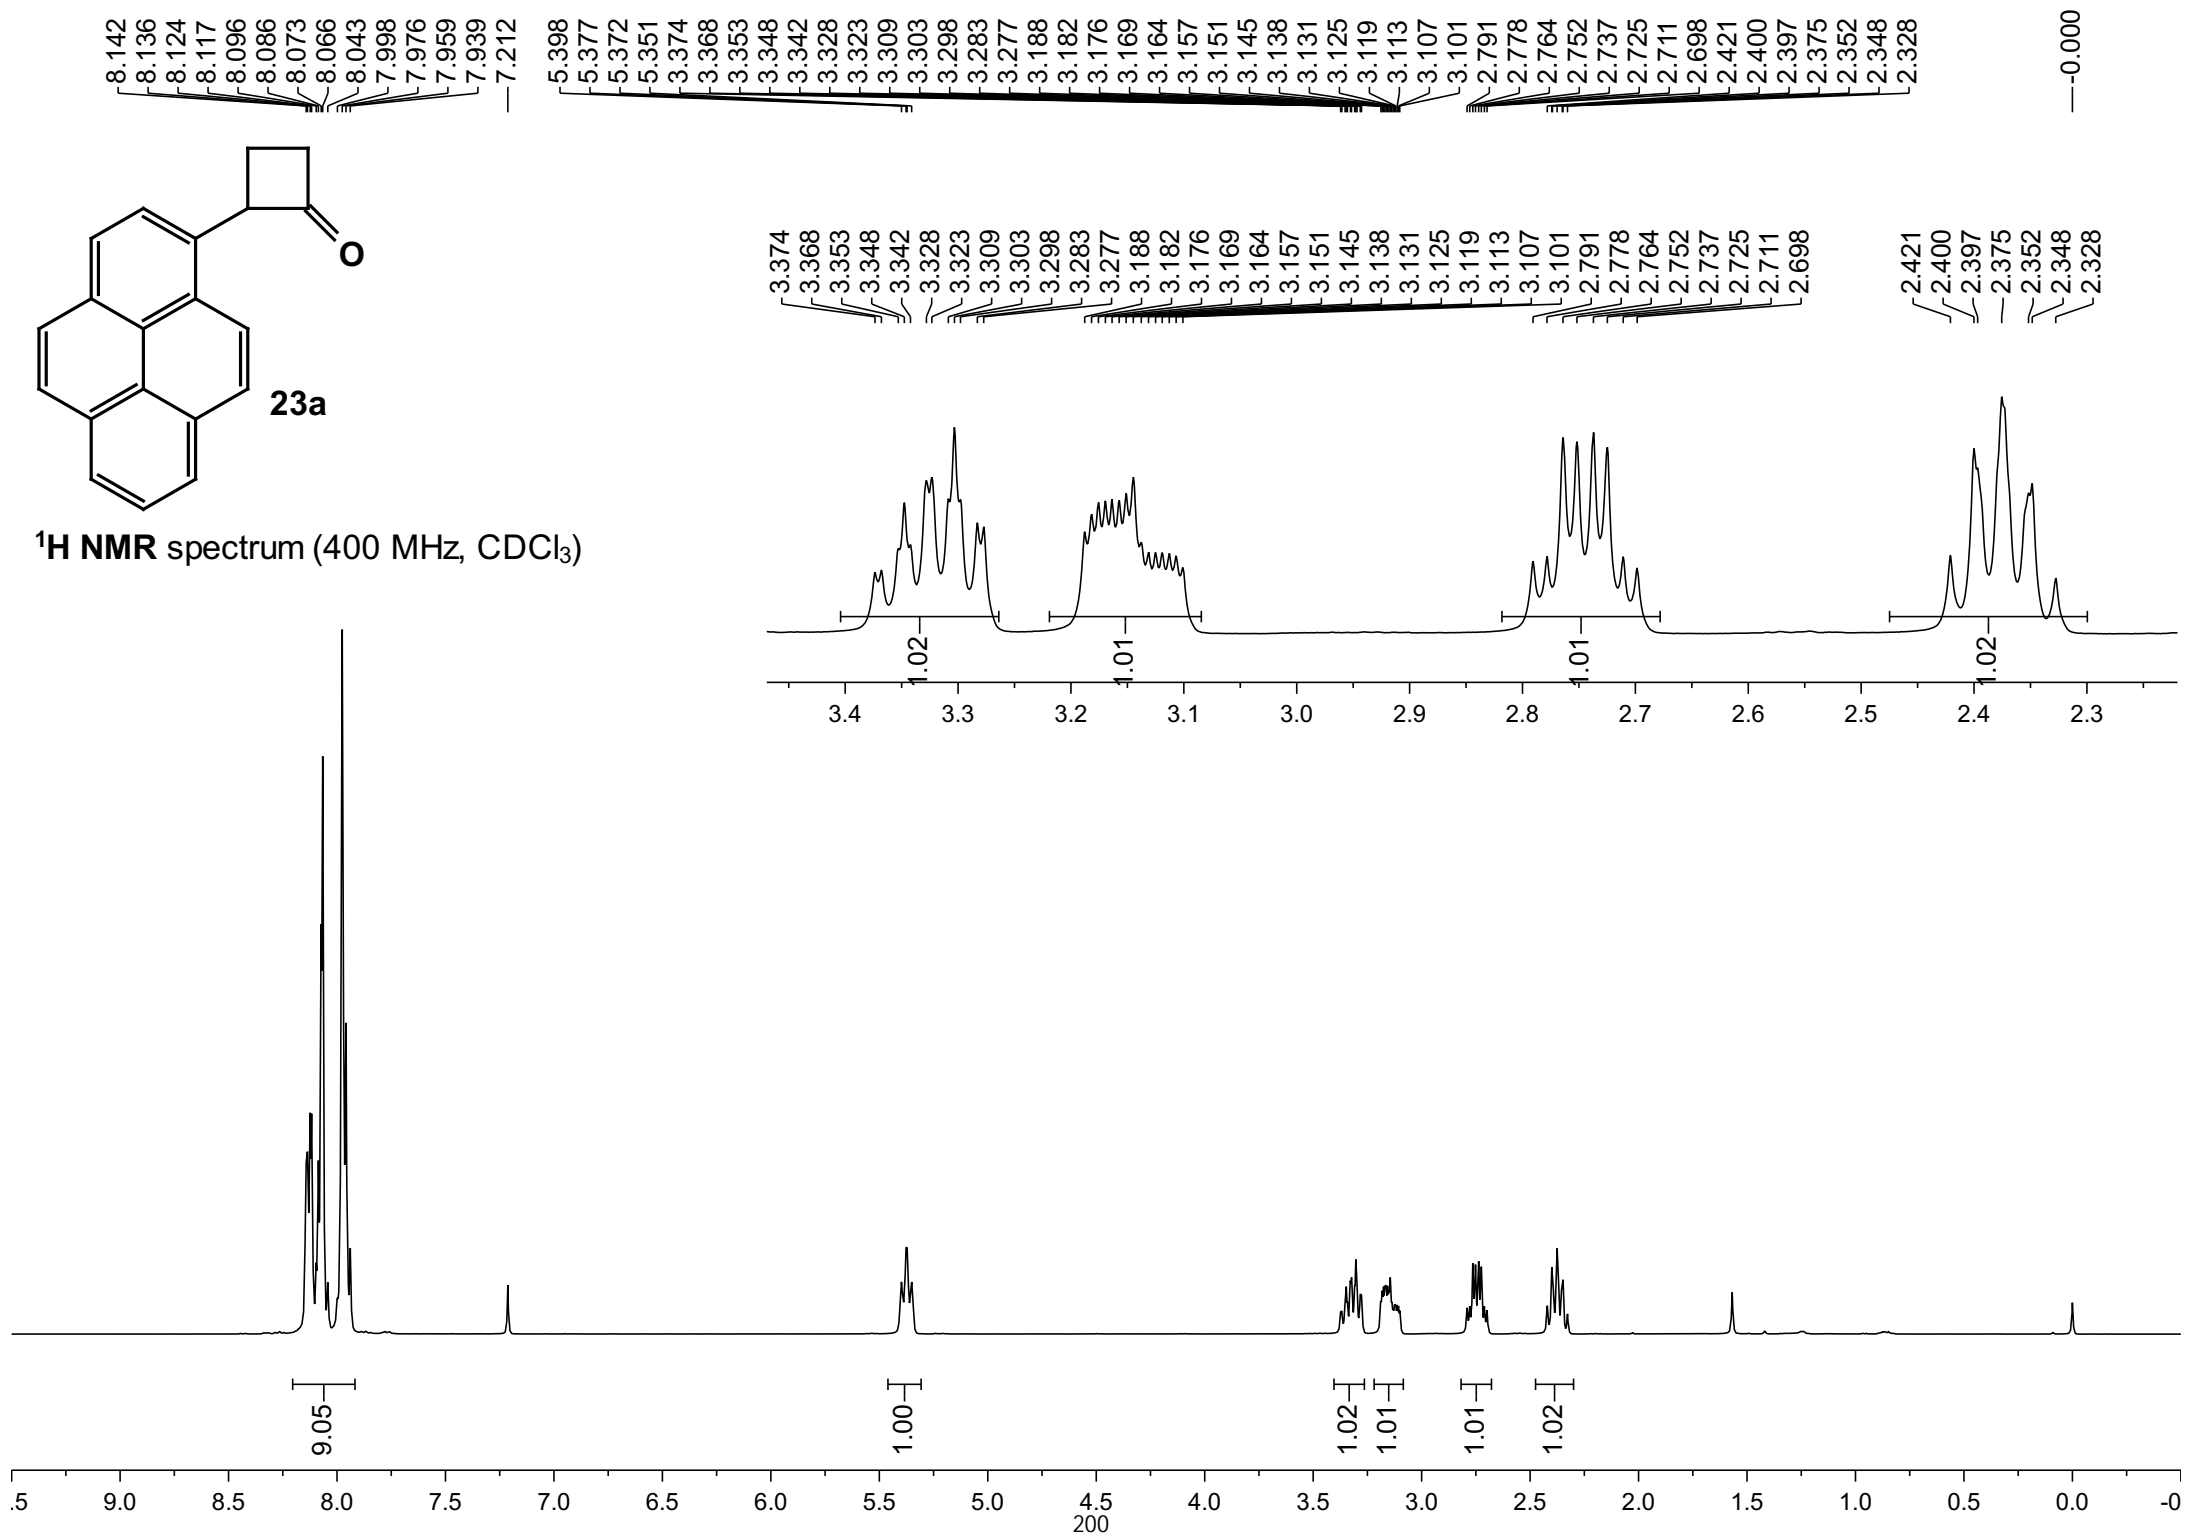

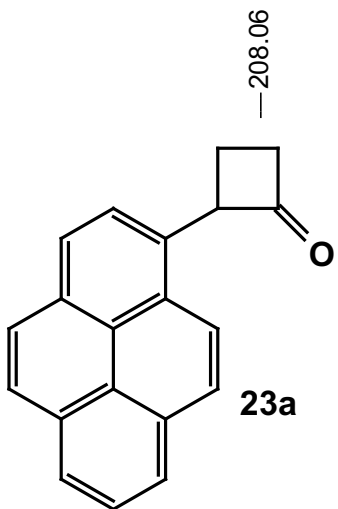

<sup>13</sup>C NMR spectrum (100 MHz, CDCl<sub>3</sub>)

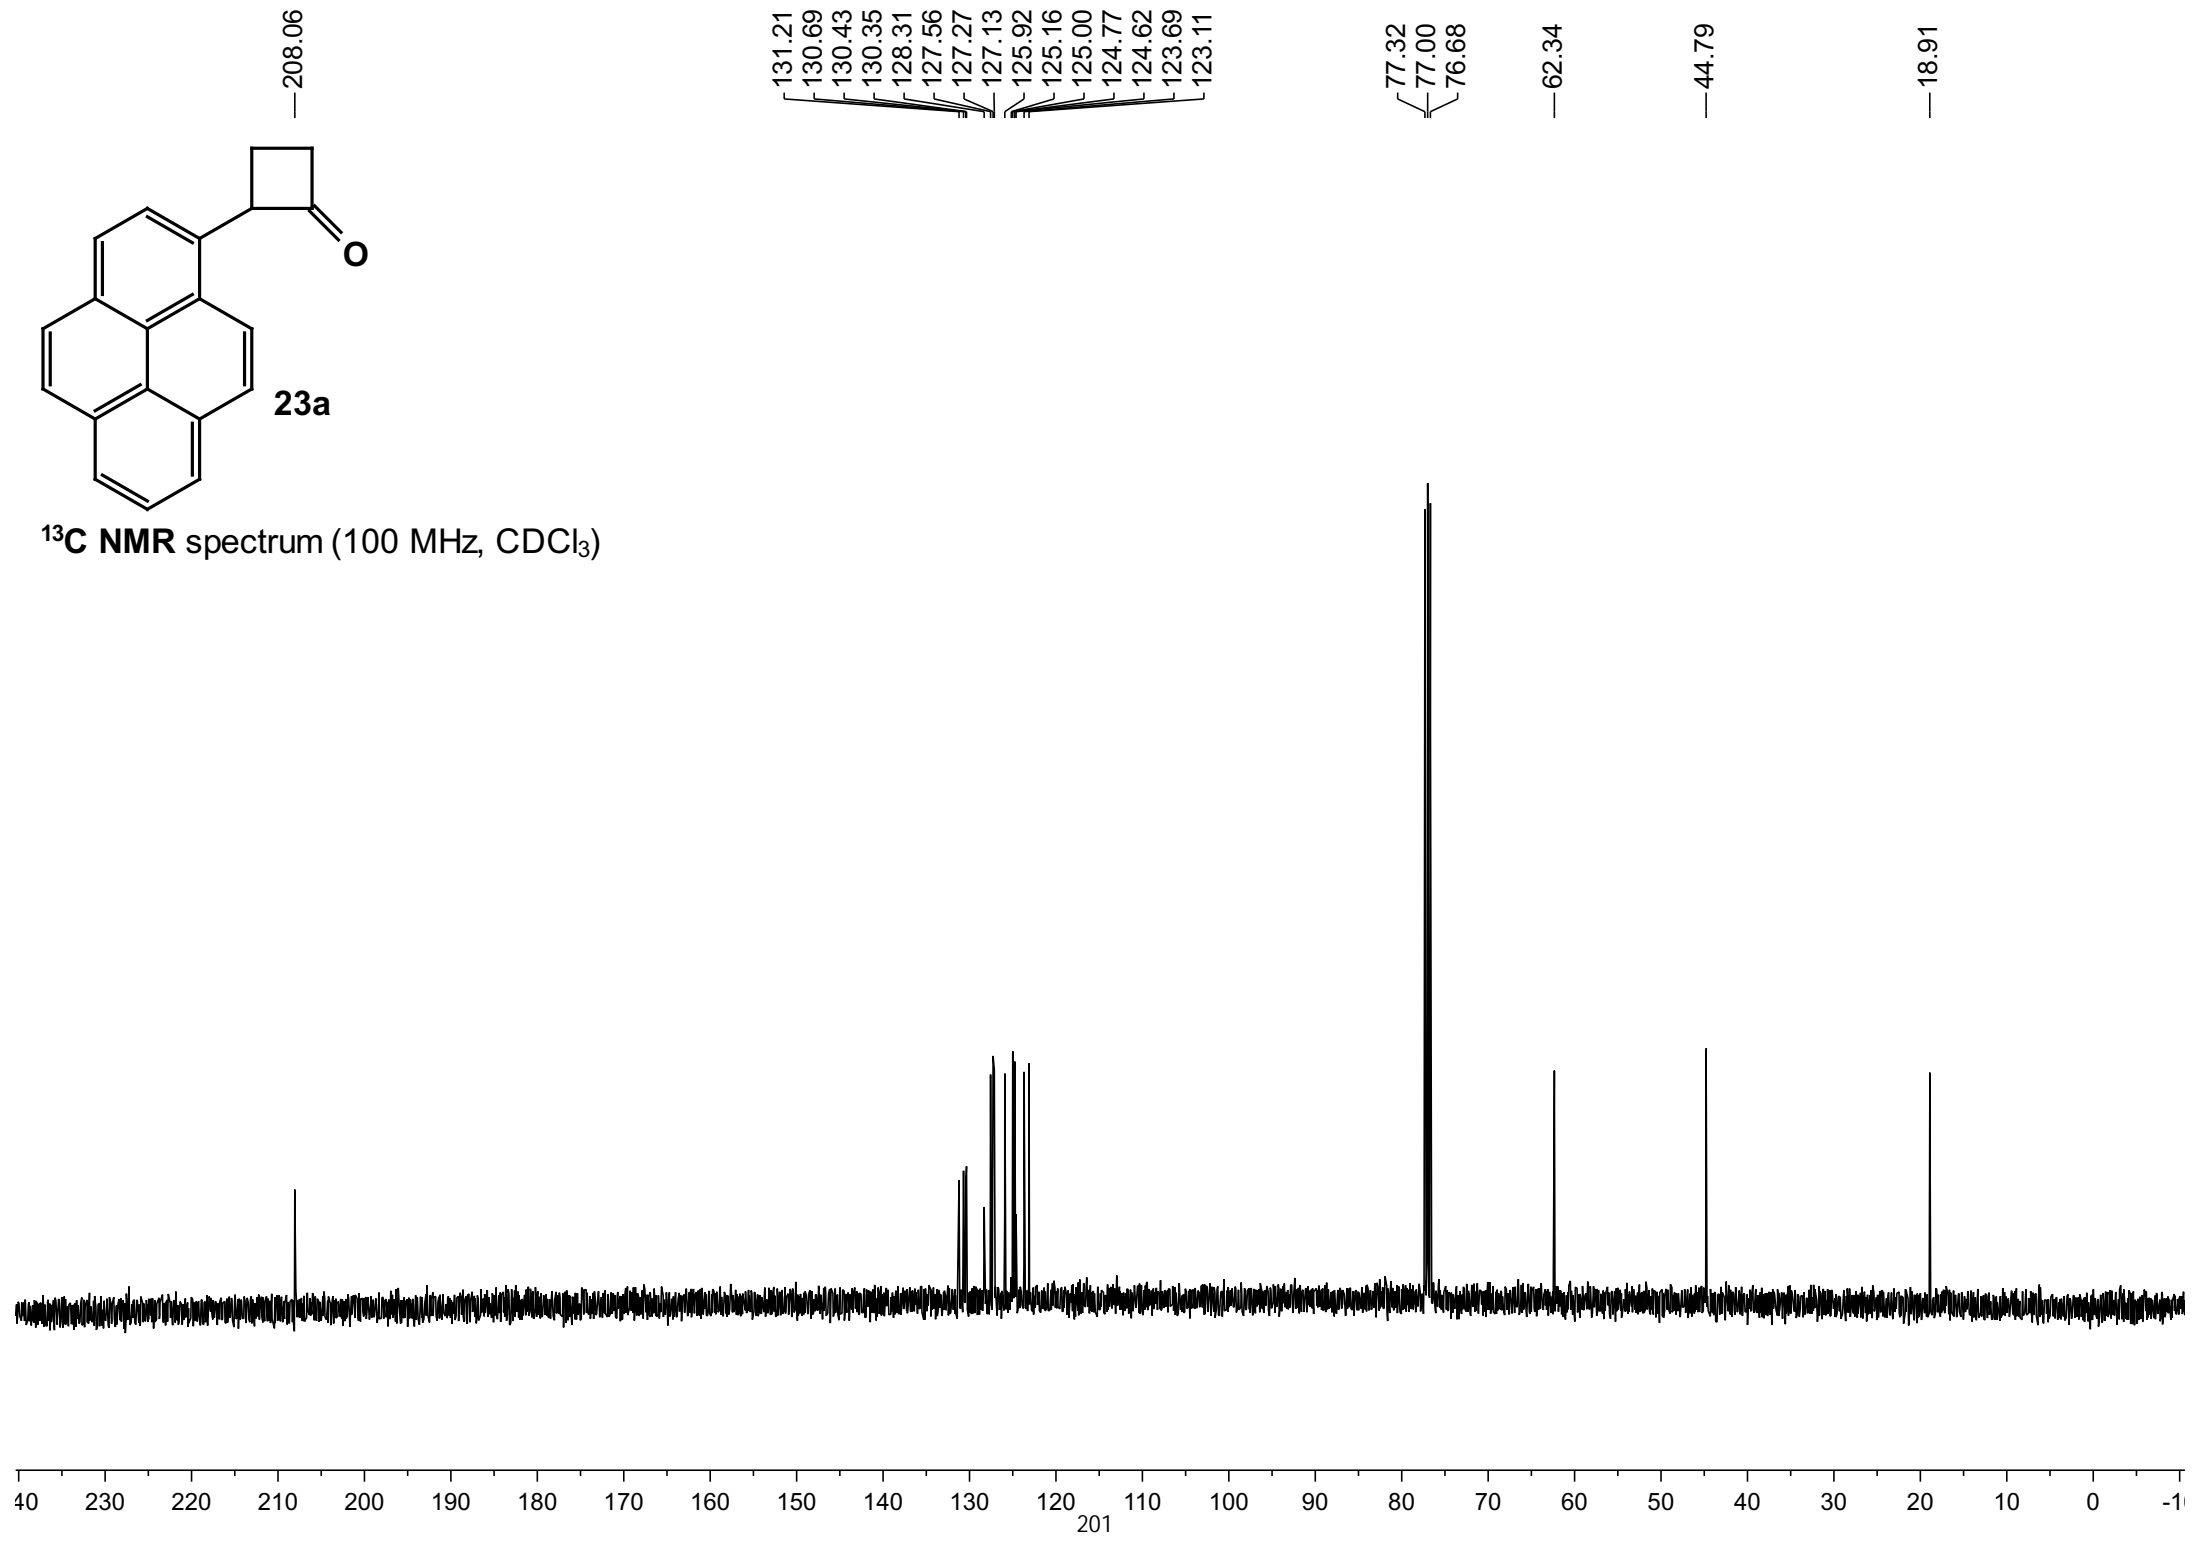

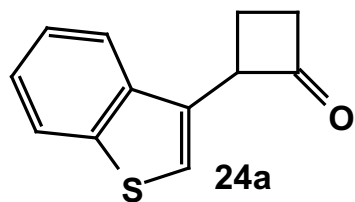

<sup>1</sup>H NMR spectrum (600 MHz, CDCl<sub>3</sub>)

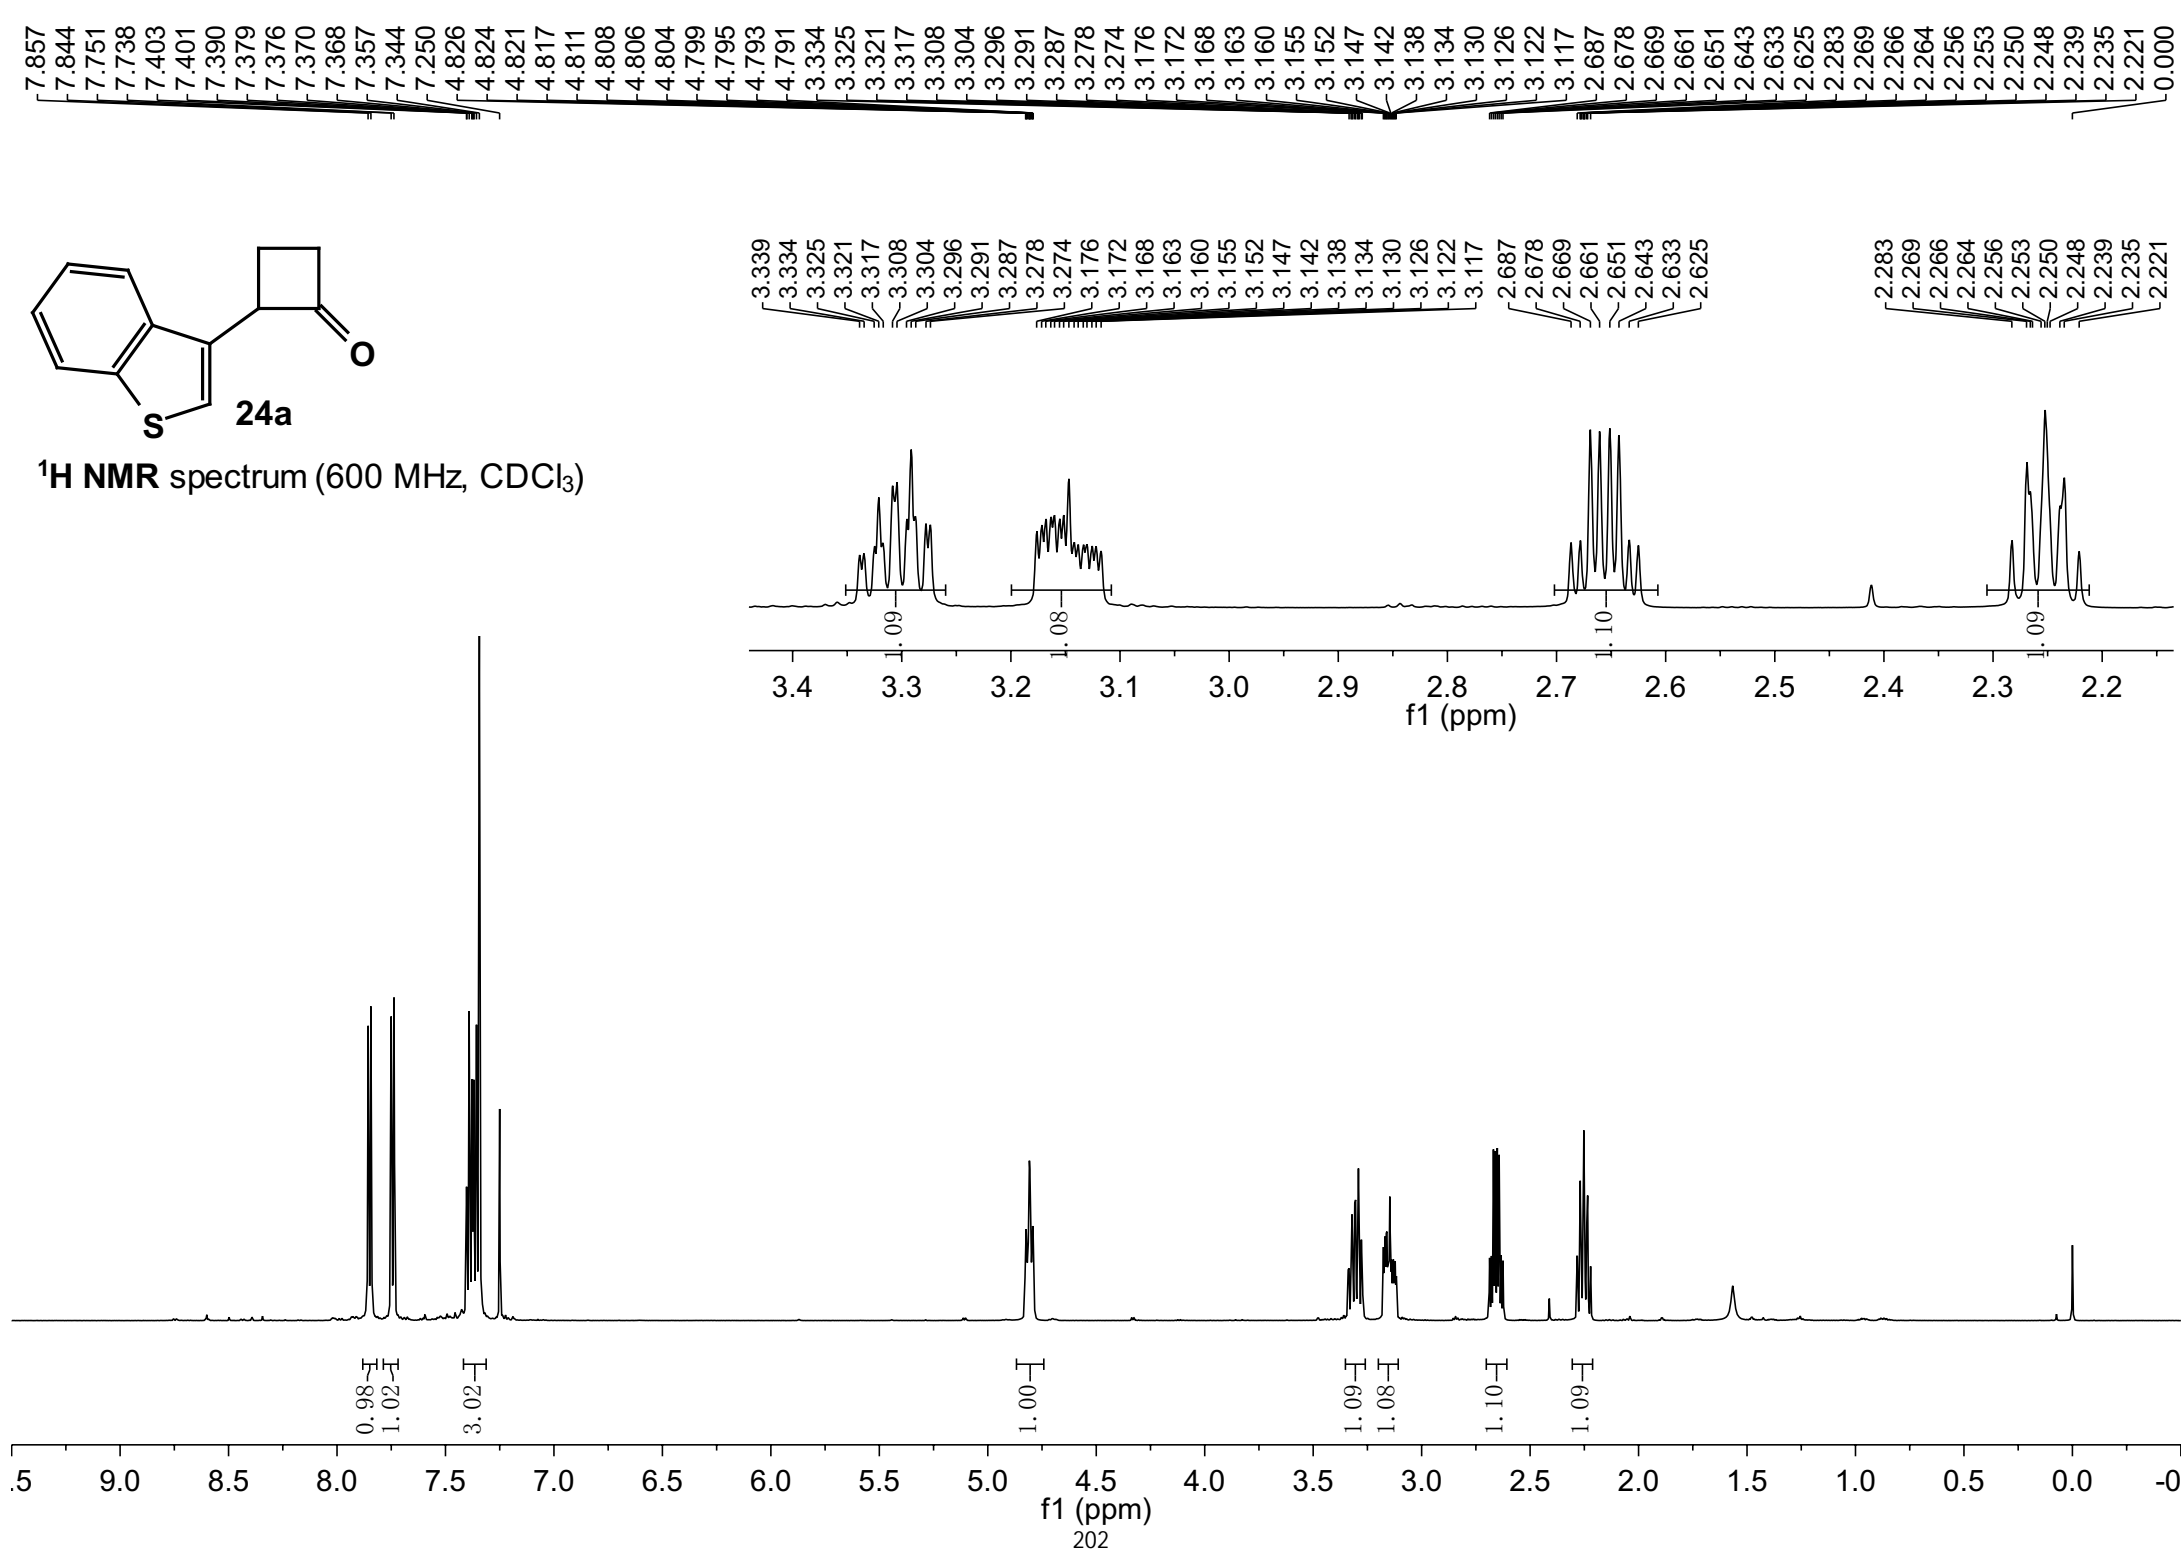

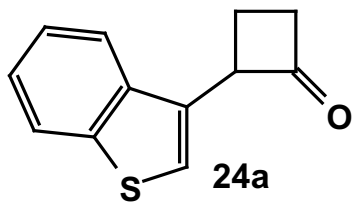

<sup>13</sup>C NMR spectrum (150 MHz, CDCl<sub>3</sub>)

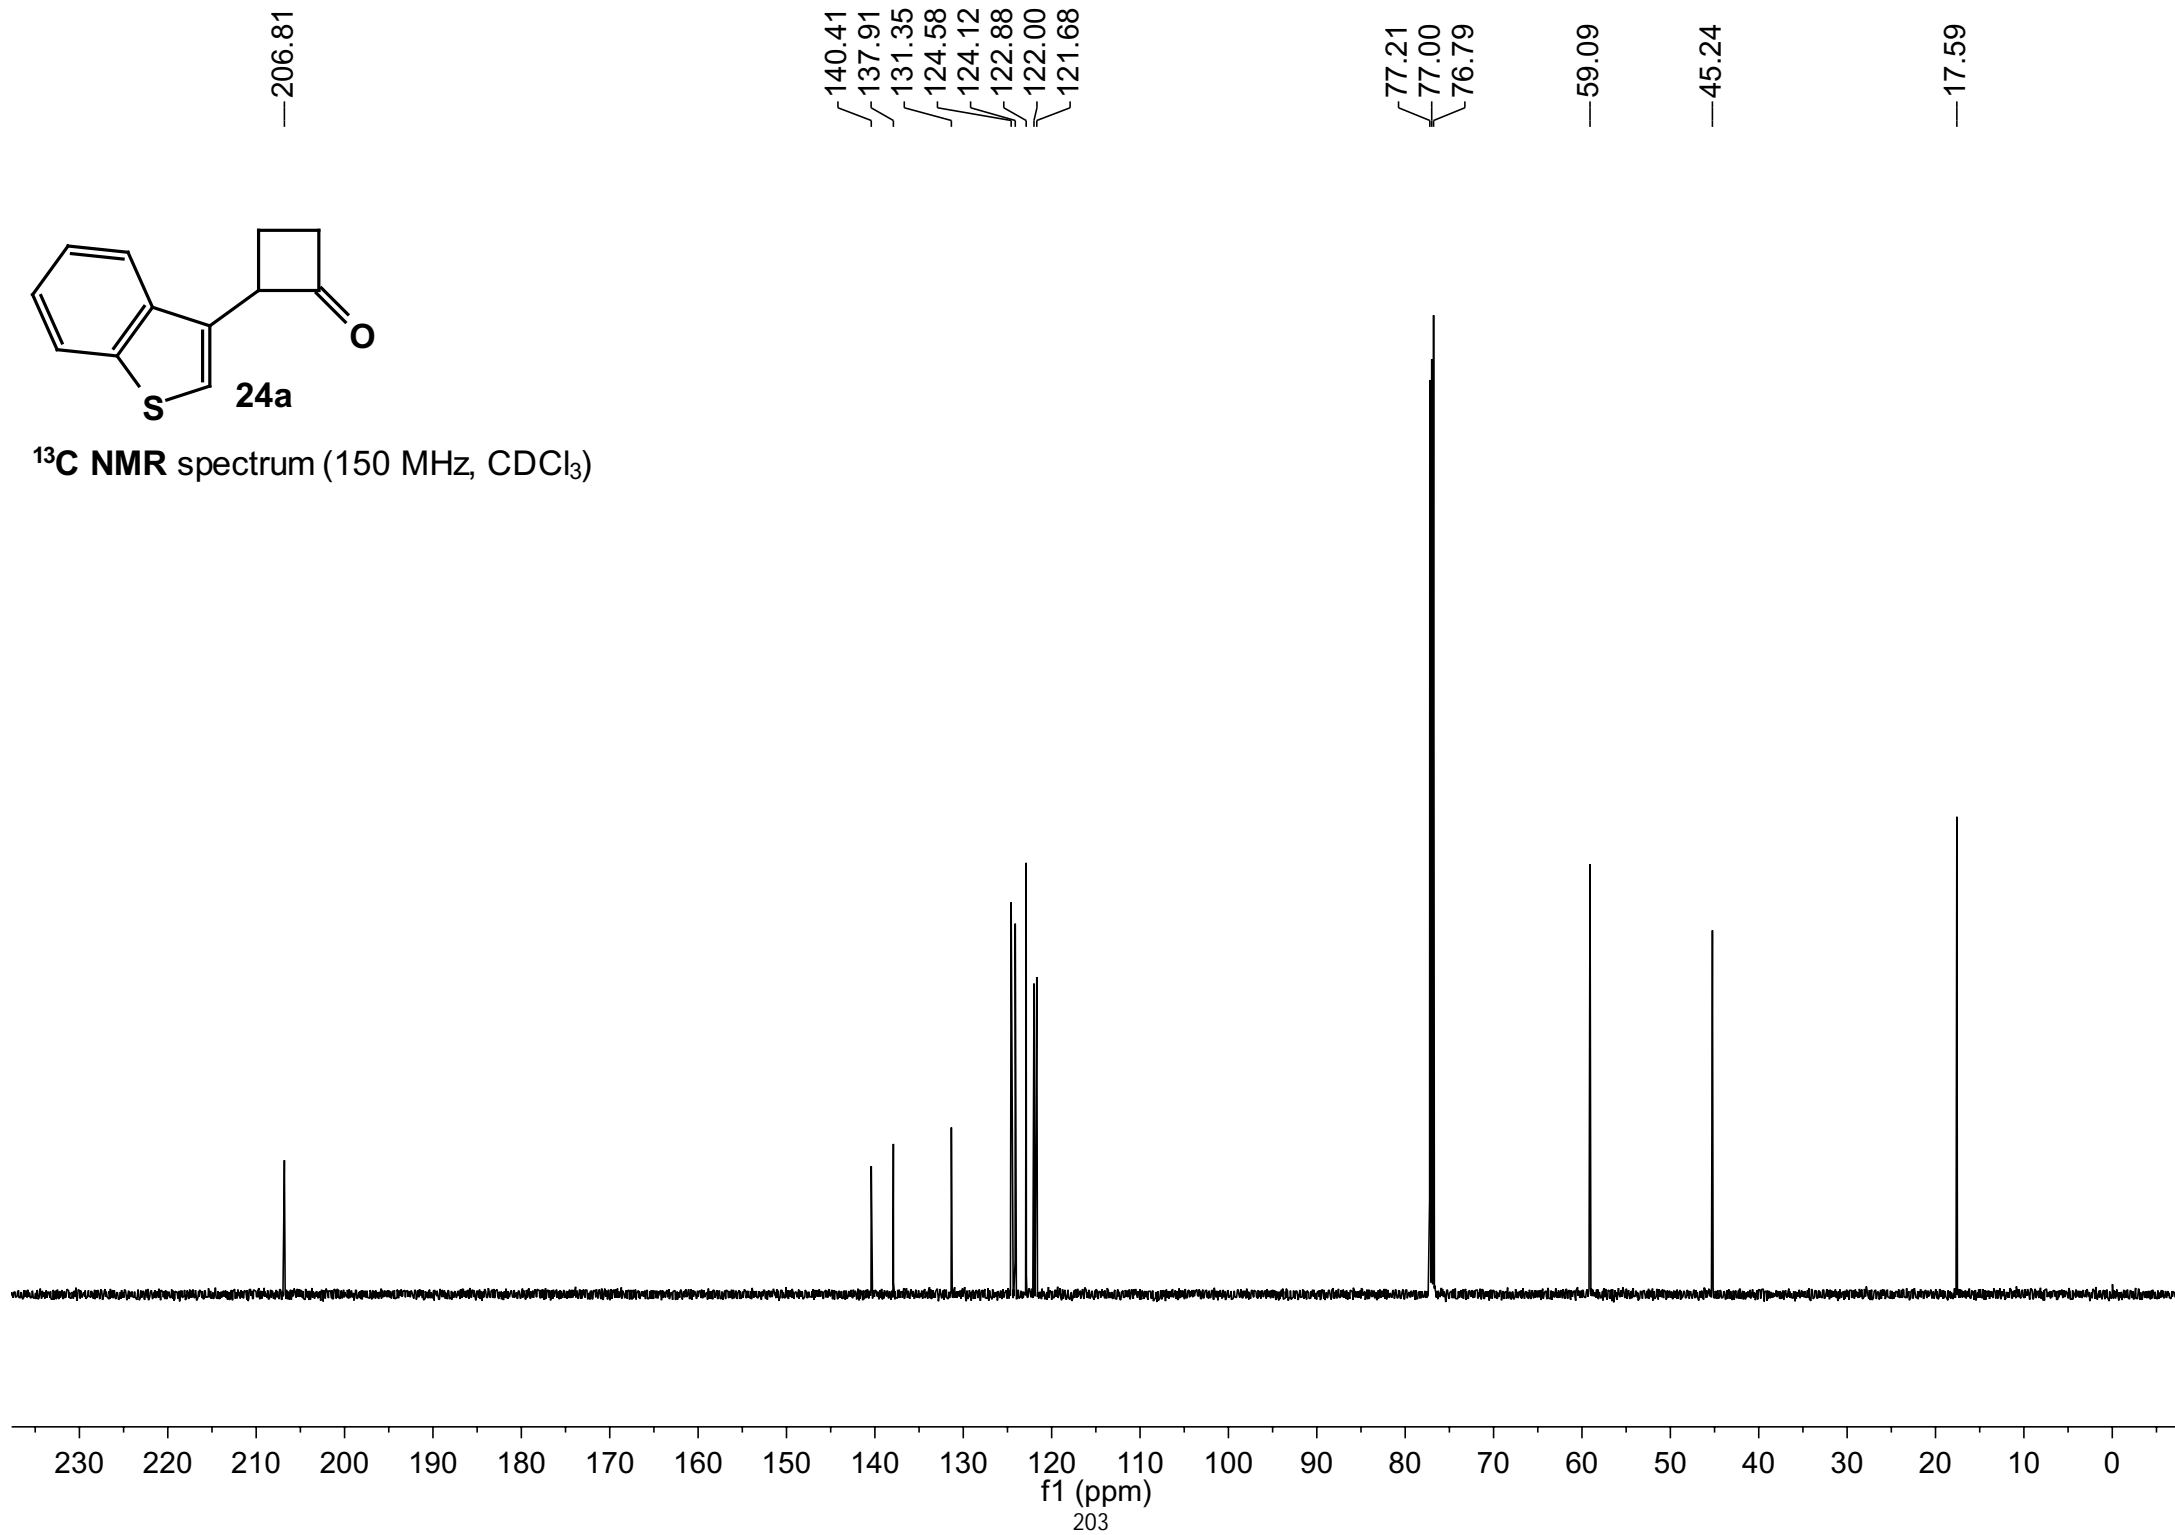



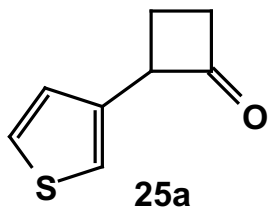

<sup>1</sup>H NMR spectrum (600 MHz, CDCl<sub>3</sub>)

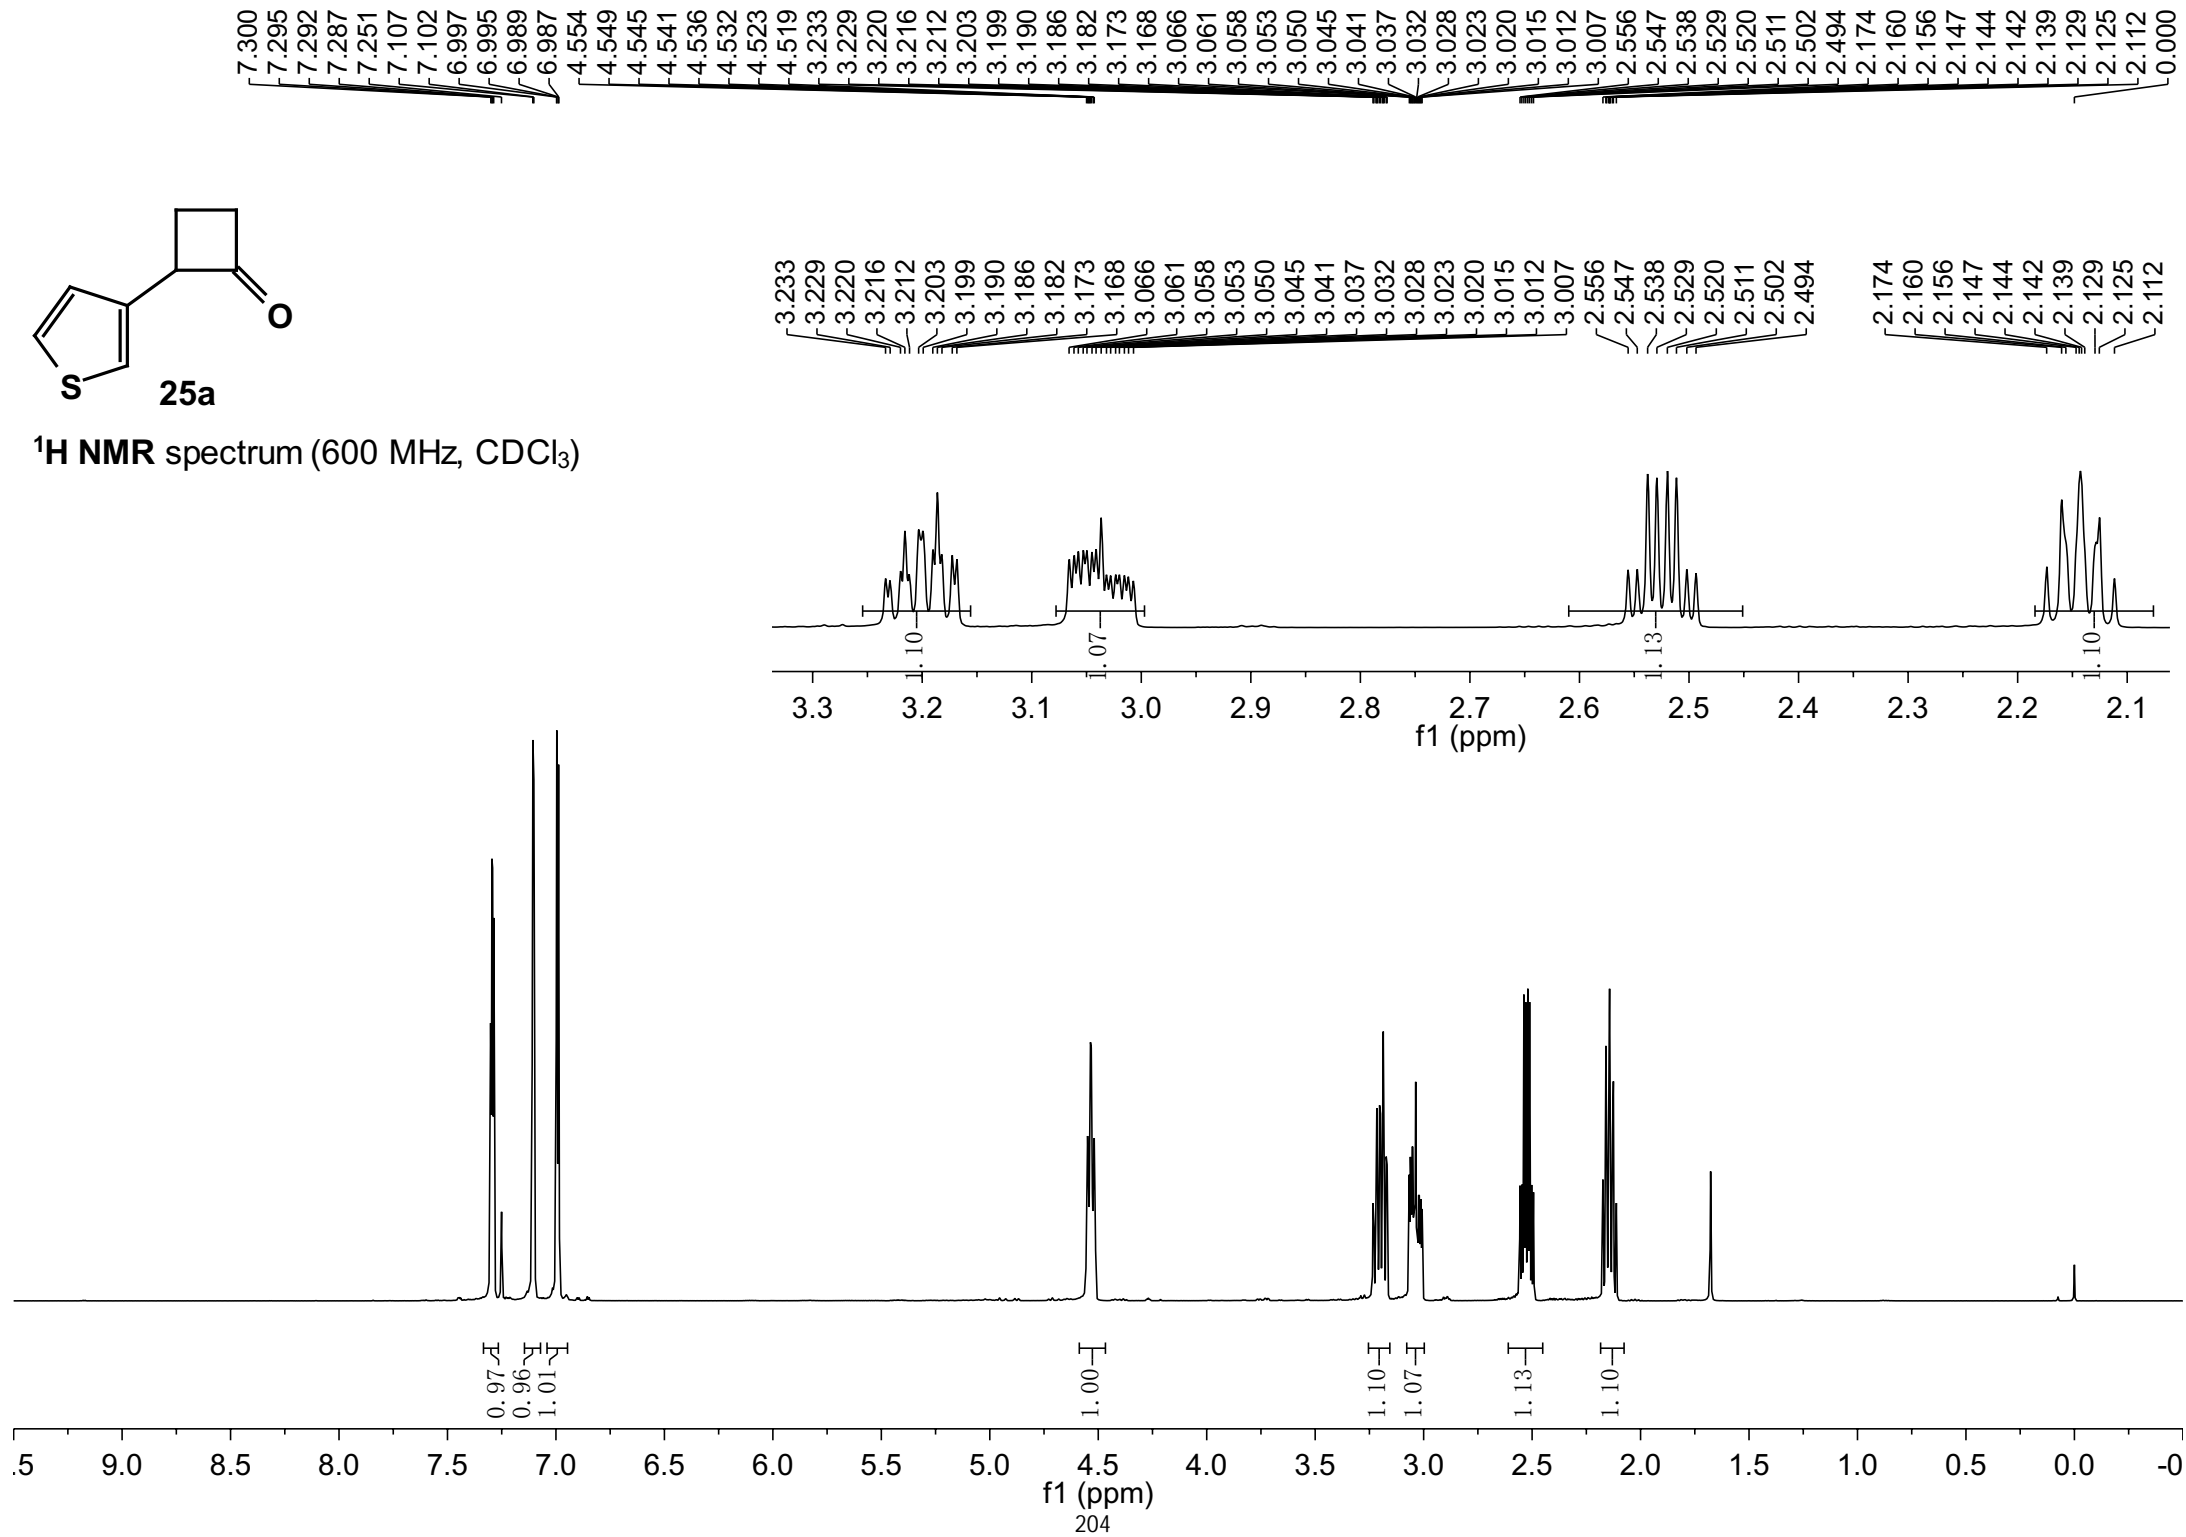

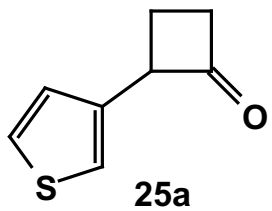

<sup>13</sup>C NMR spectrum (150 MHz, CDCl<sub>3</sub>)

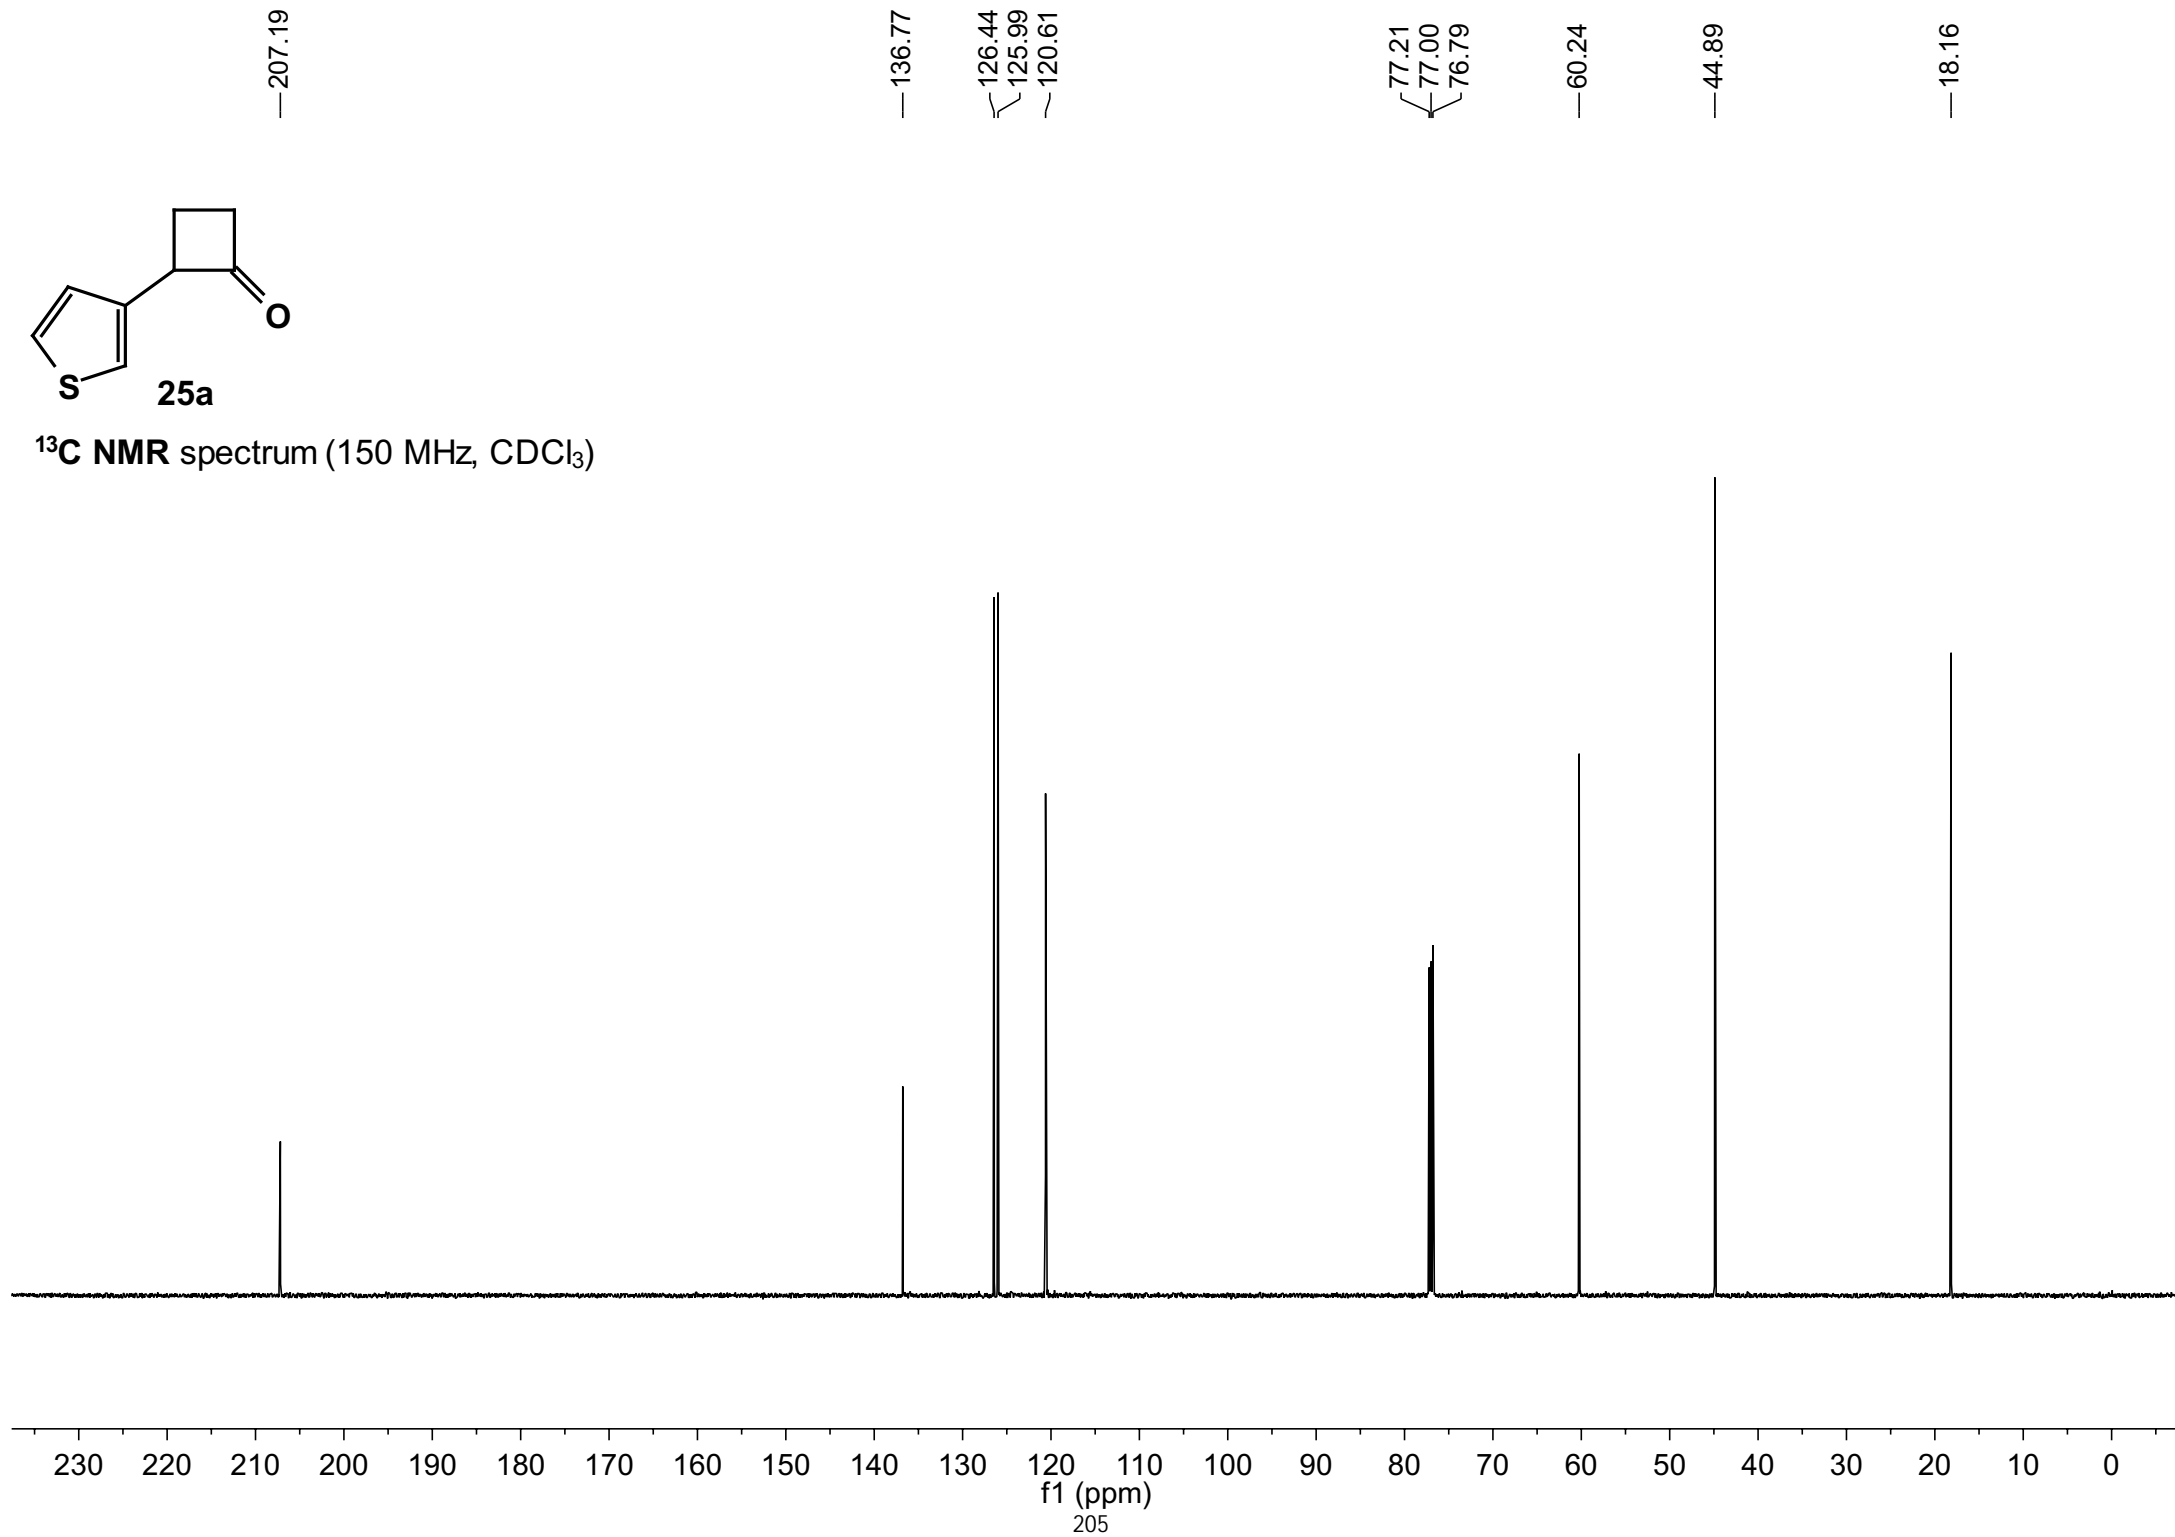

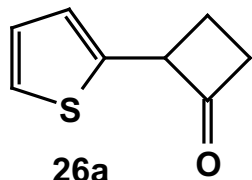

<sup>1</sup>H NMR spectrum (600 MHz, CDCl<sub>3</sub>)

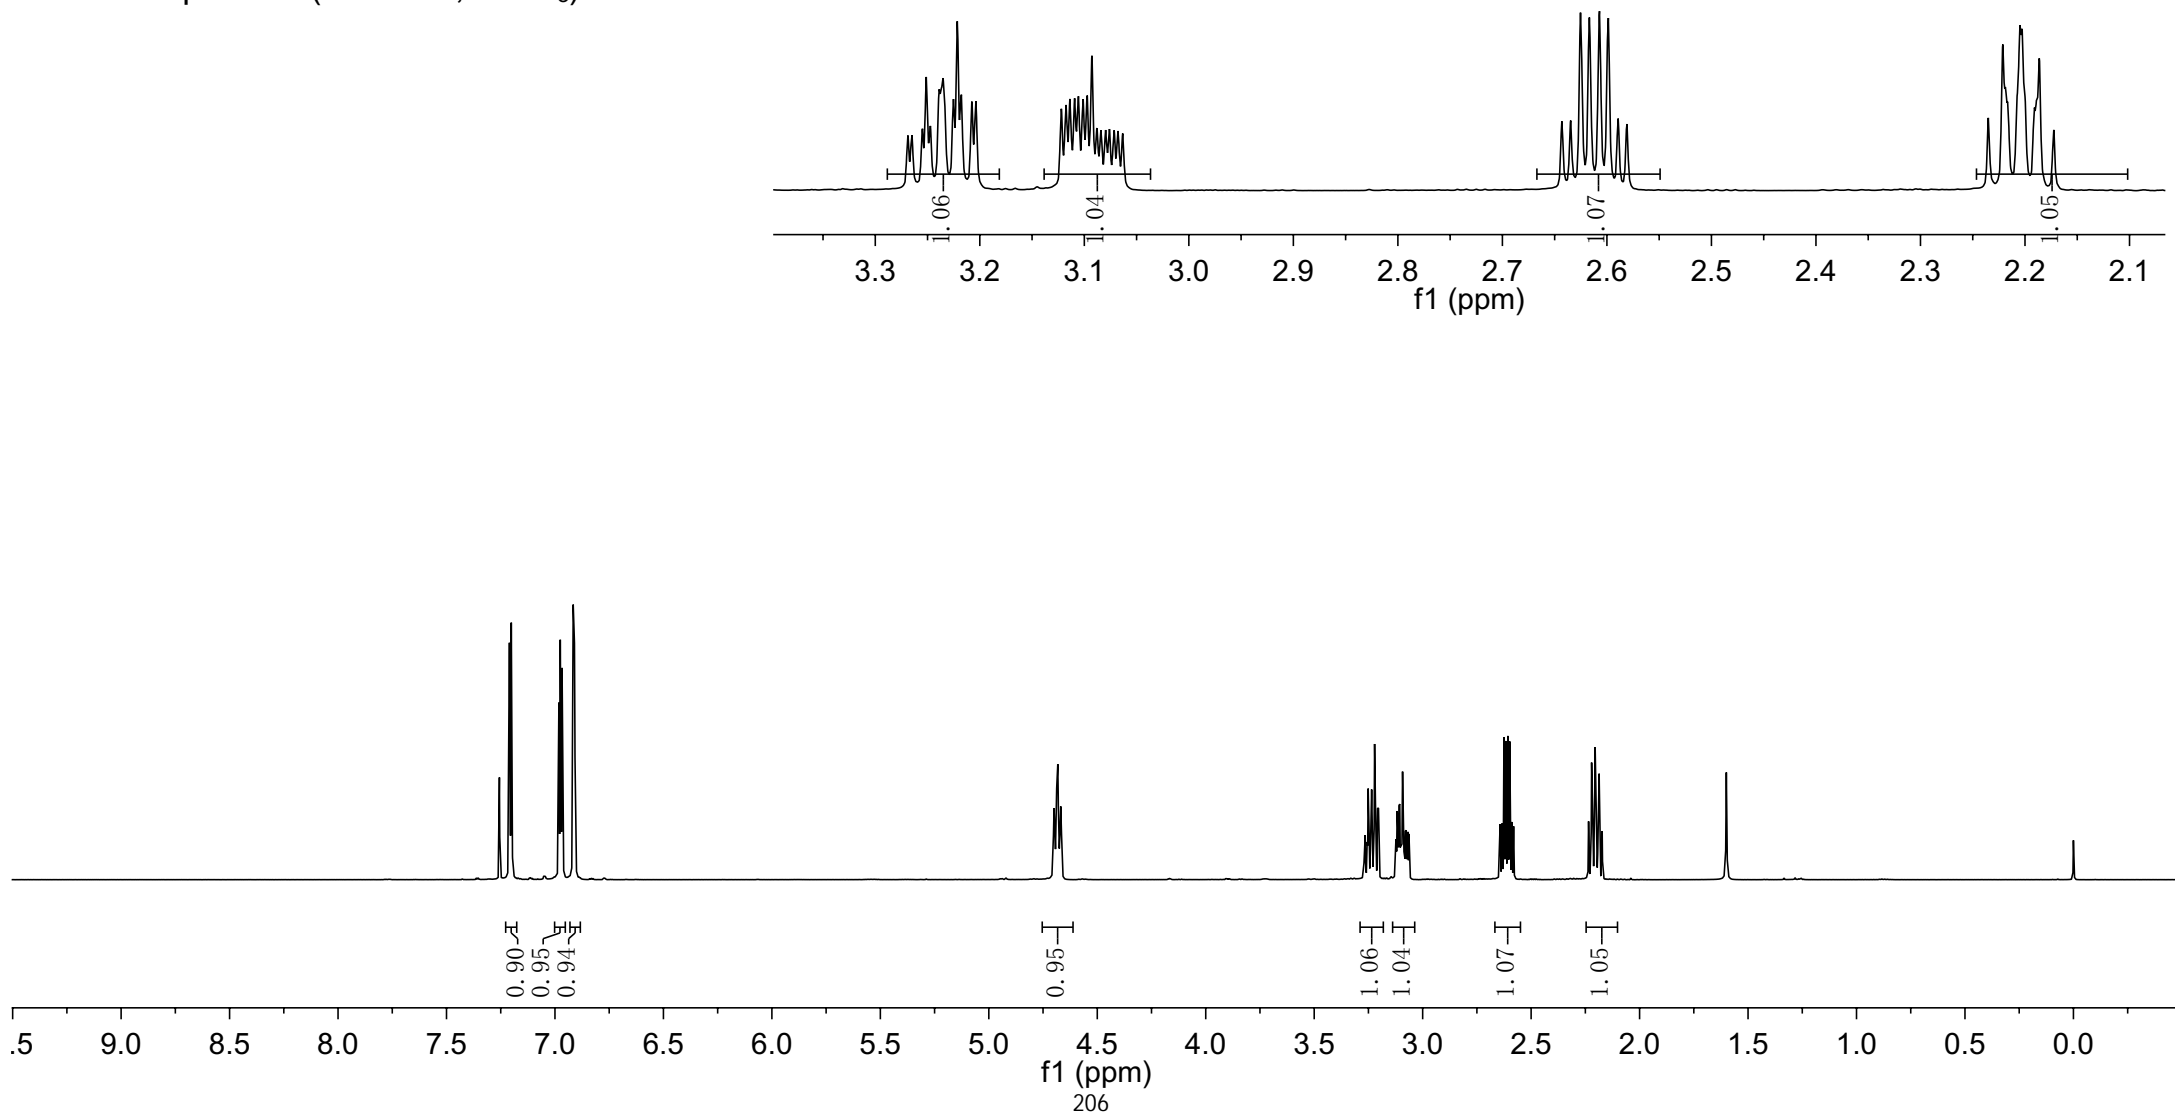

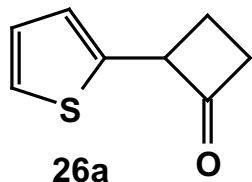

<sup>13</sup>C NMR spectrum (150 MHz, CDCl<sub>3</sub>)

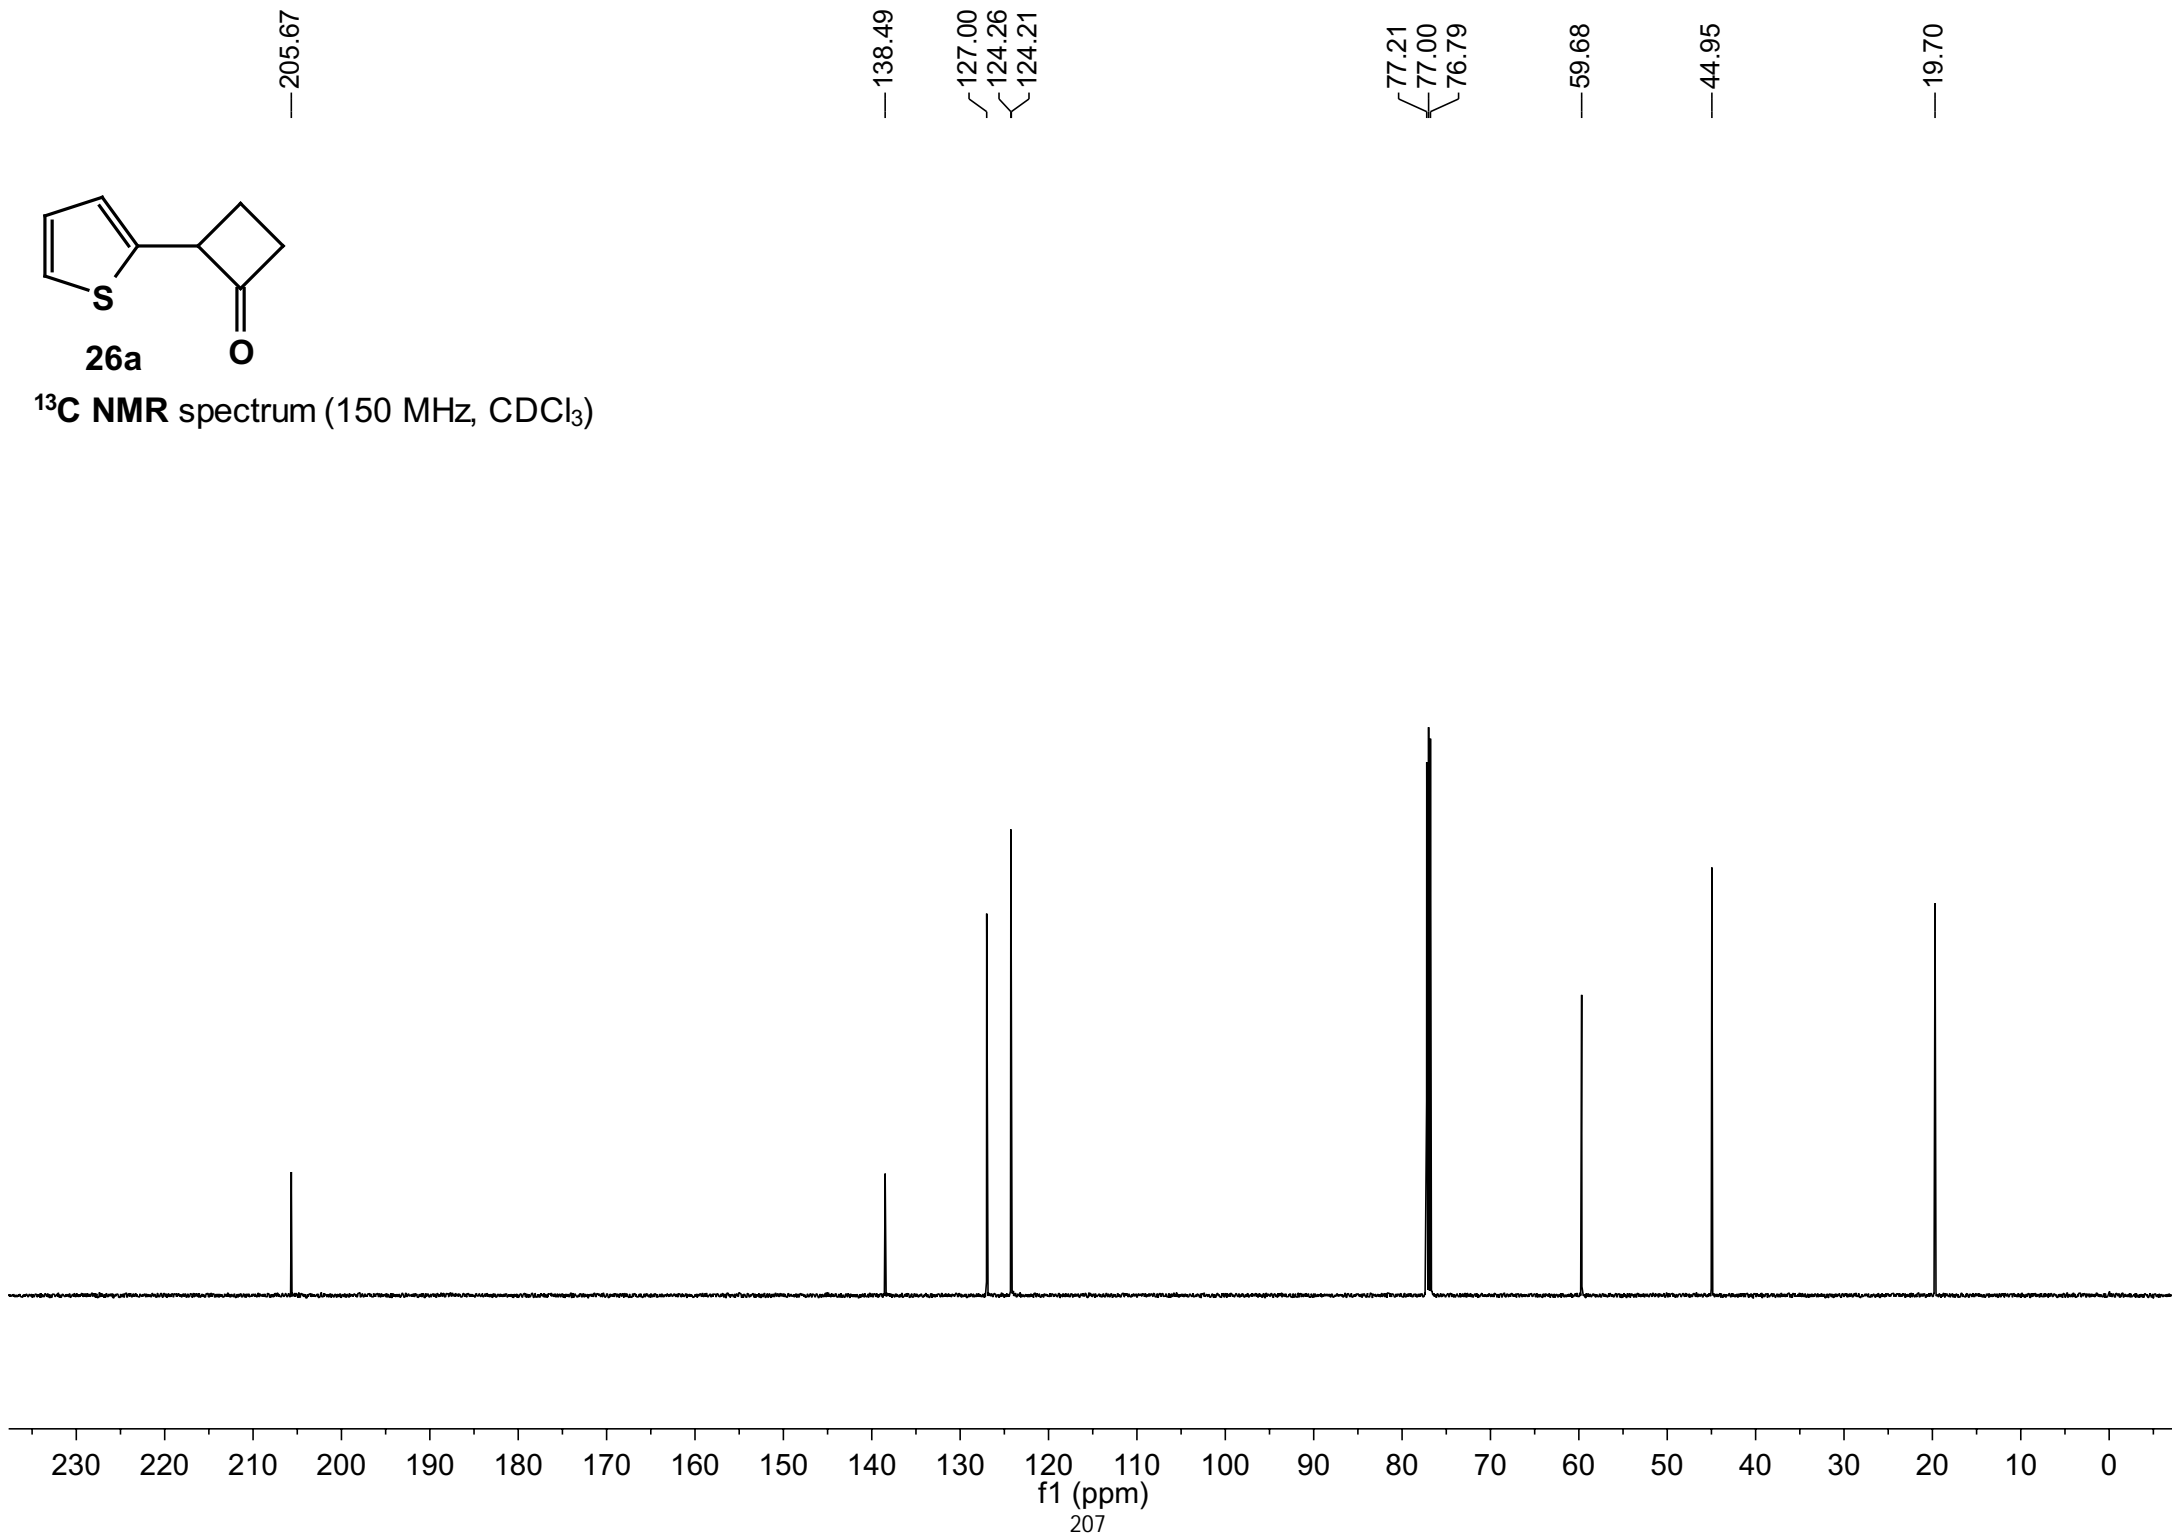

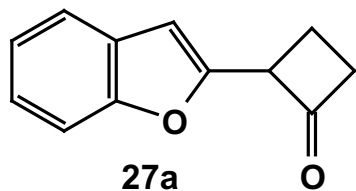

<sup>1</sup>H NMR spectrum (600 MHz, CDCl<sub>3</sub>)

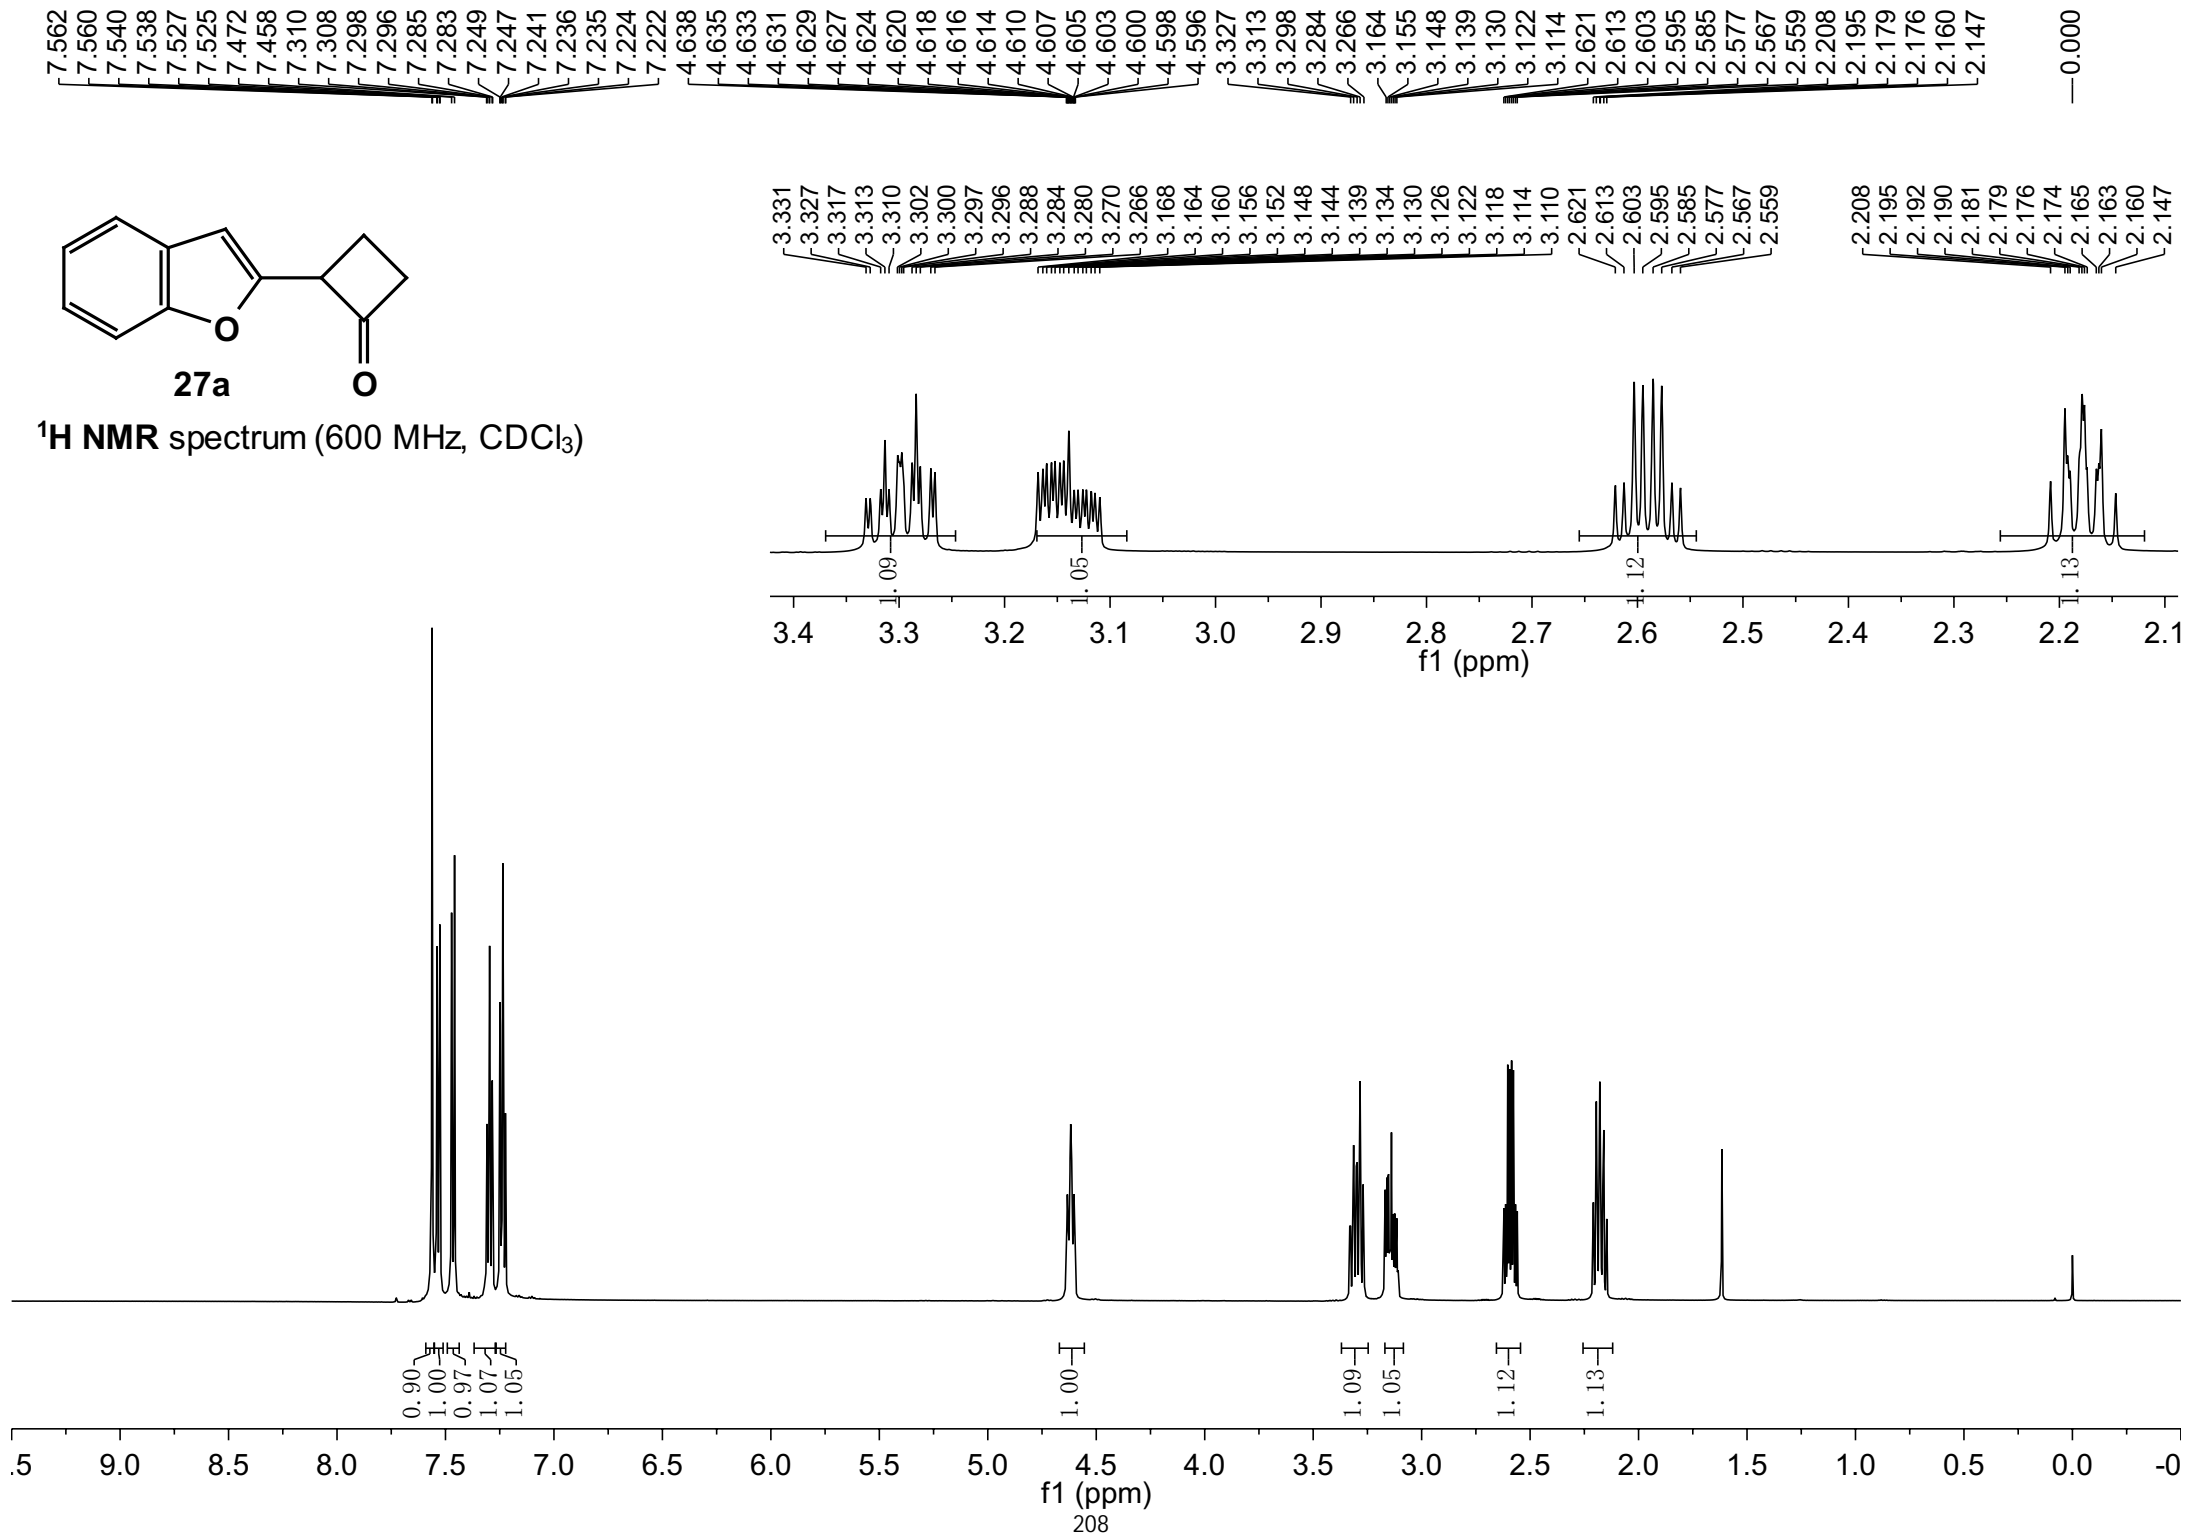



27a

<sup>13</sup>C NMR spectrum (150 MHz, CDCl<sub>3</sub>)

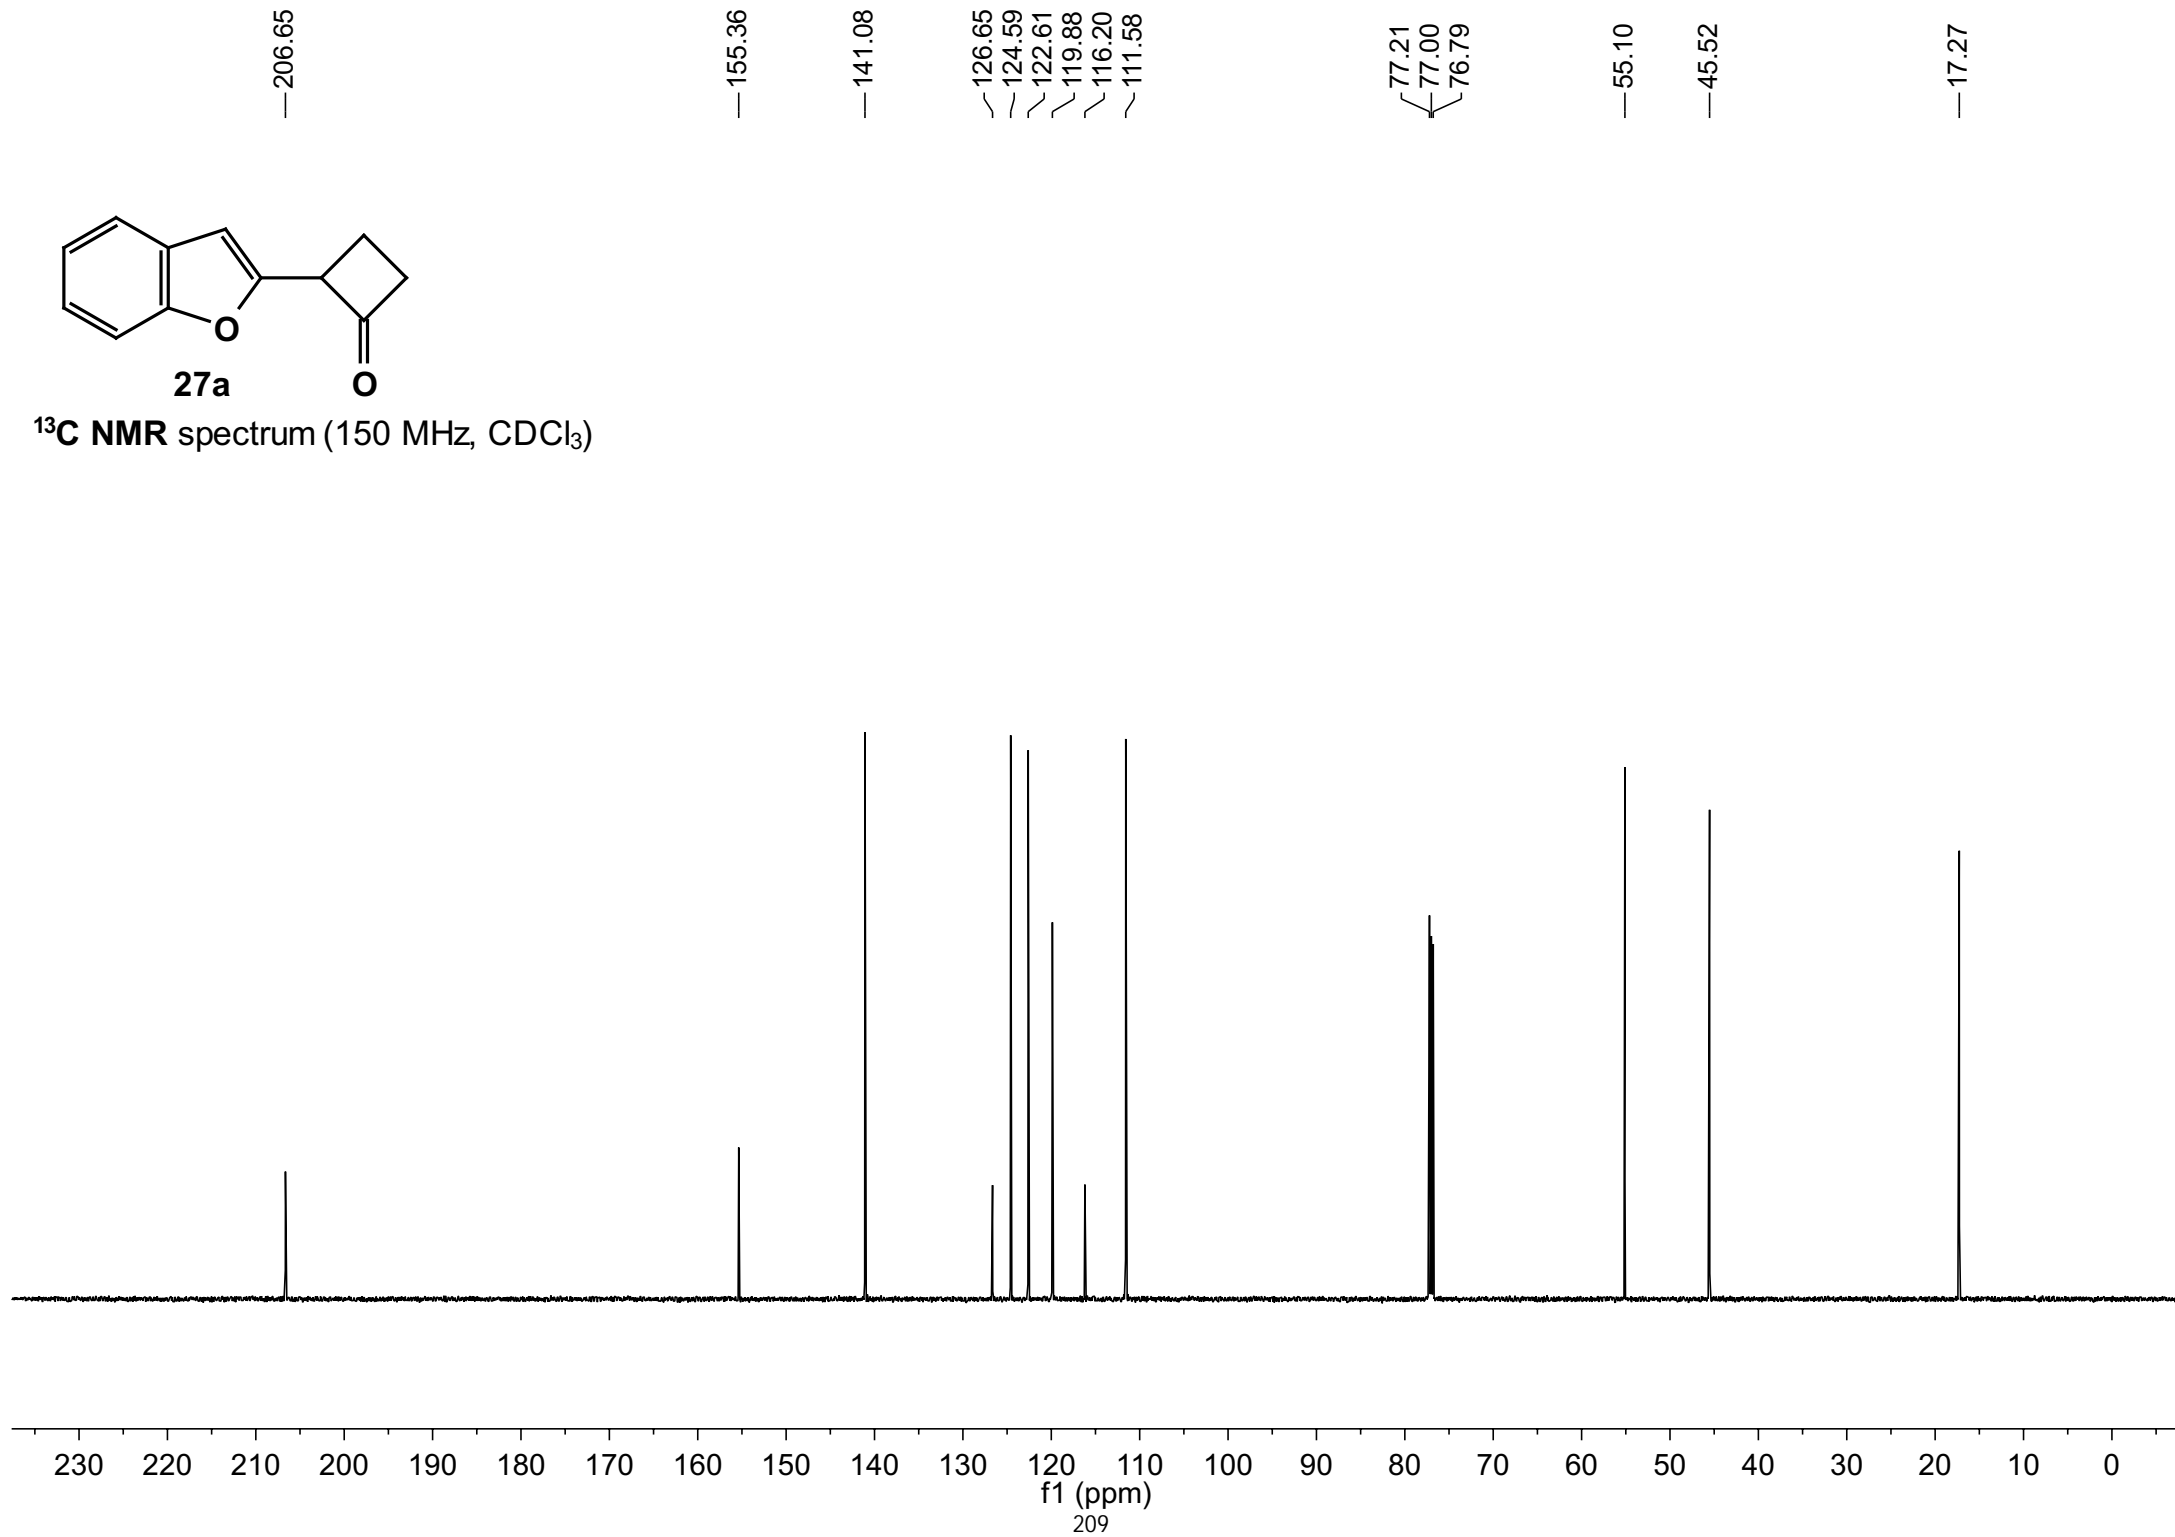

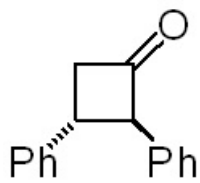

**28a**

<sup>1</sup>H NMR spectrum (400 MHz, CDCl<sub>3</sub>)

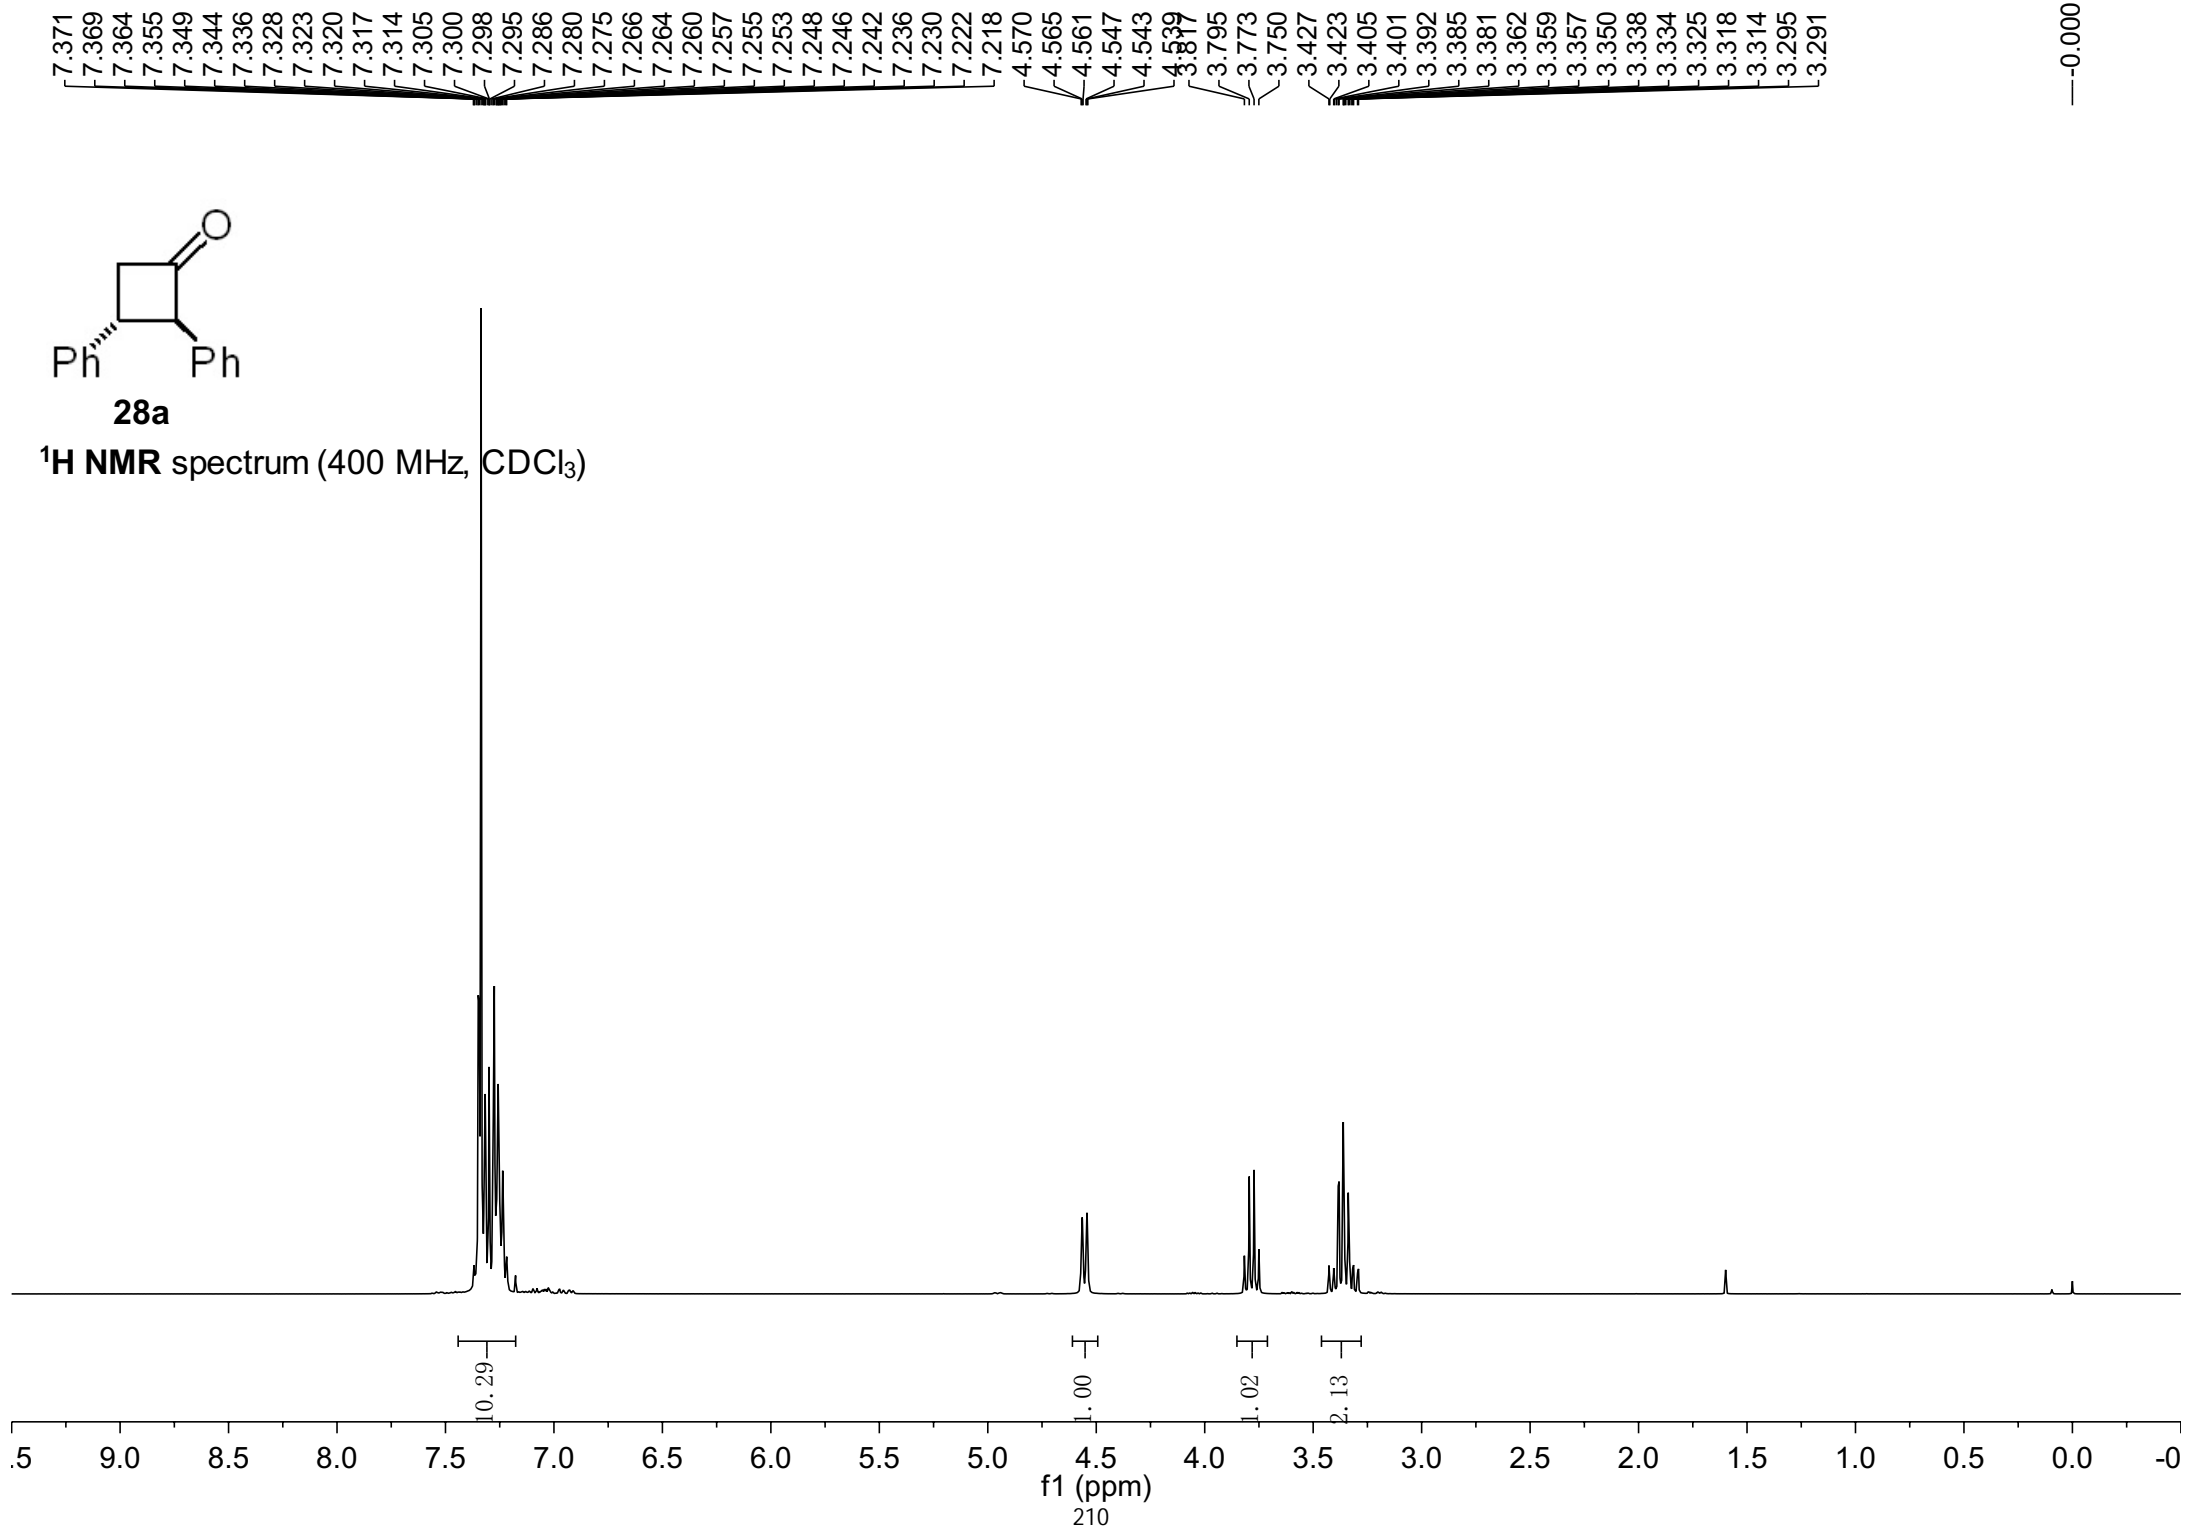

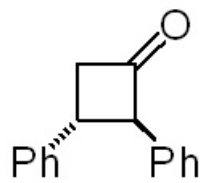

**28a**

<sup>13</sup>C NMR spectrum (100 MHz, CDCl<sub>3</sub>)

— 204.91

142.39  
135.63  
128.71  
128.65  
127.19  
126.97  
126.84  
126.51

77.32  
77.00  
76.68  
71.35

— 51.30

— 36.68

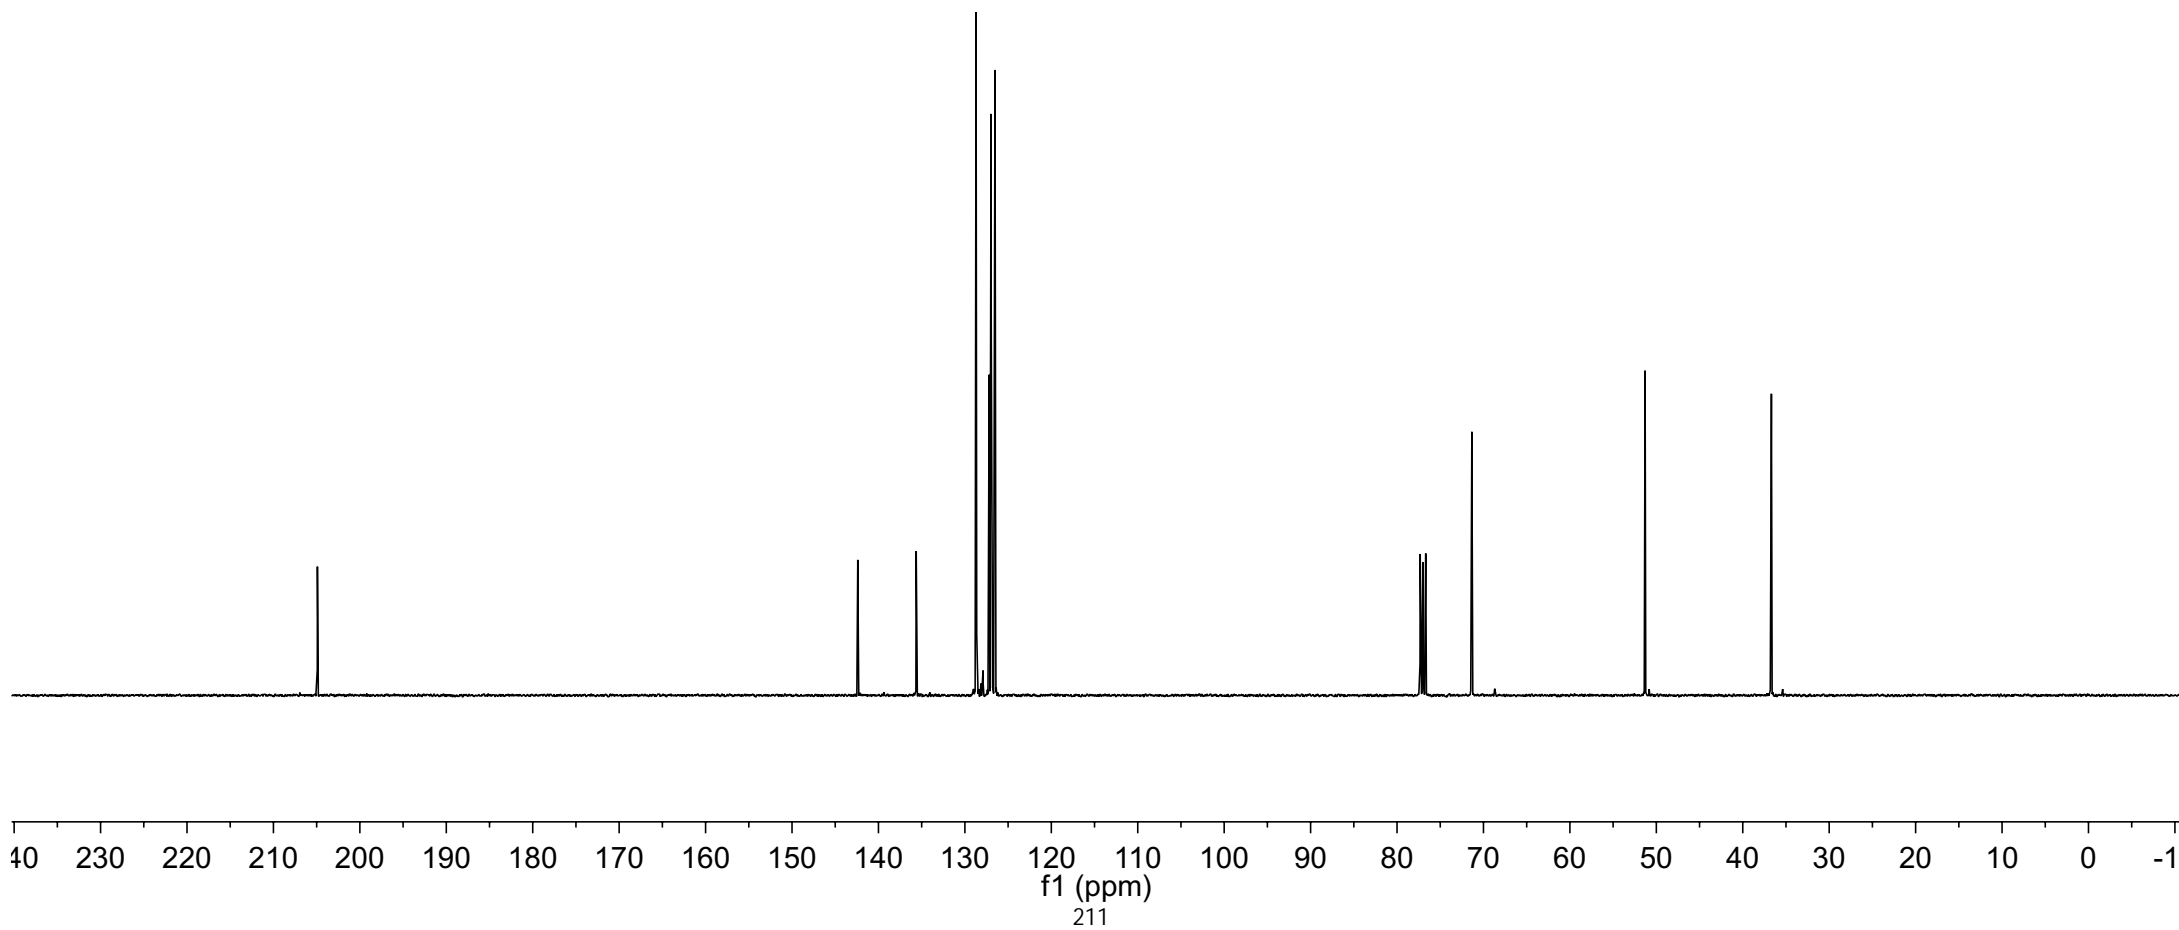



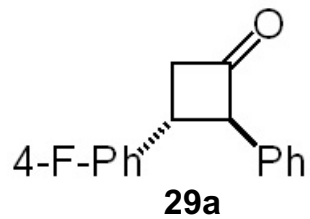

<sup>1</sup>H NMR spectrum (400 MHz, CDCl<sub>3</sub>)

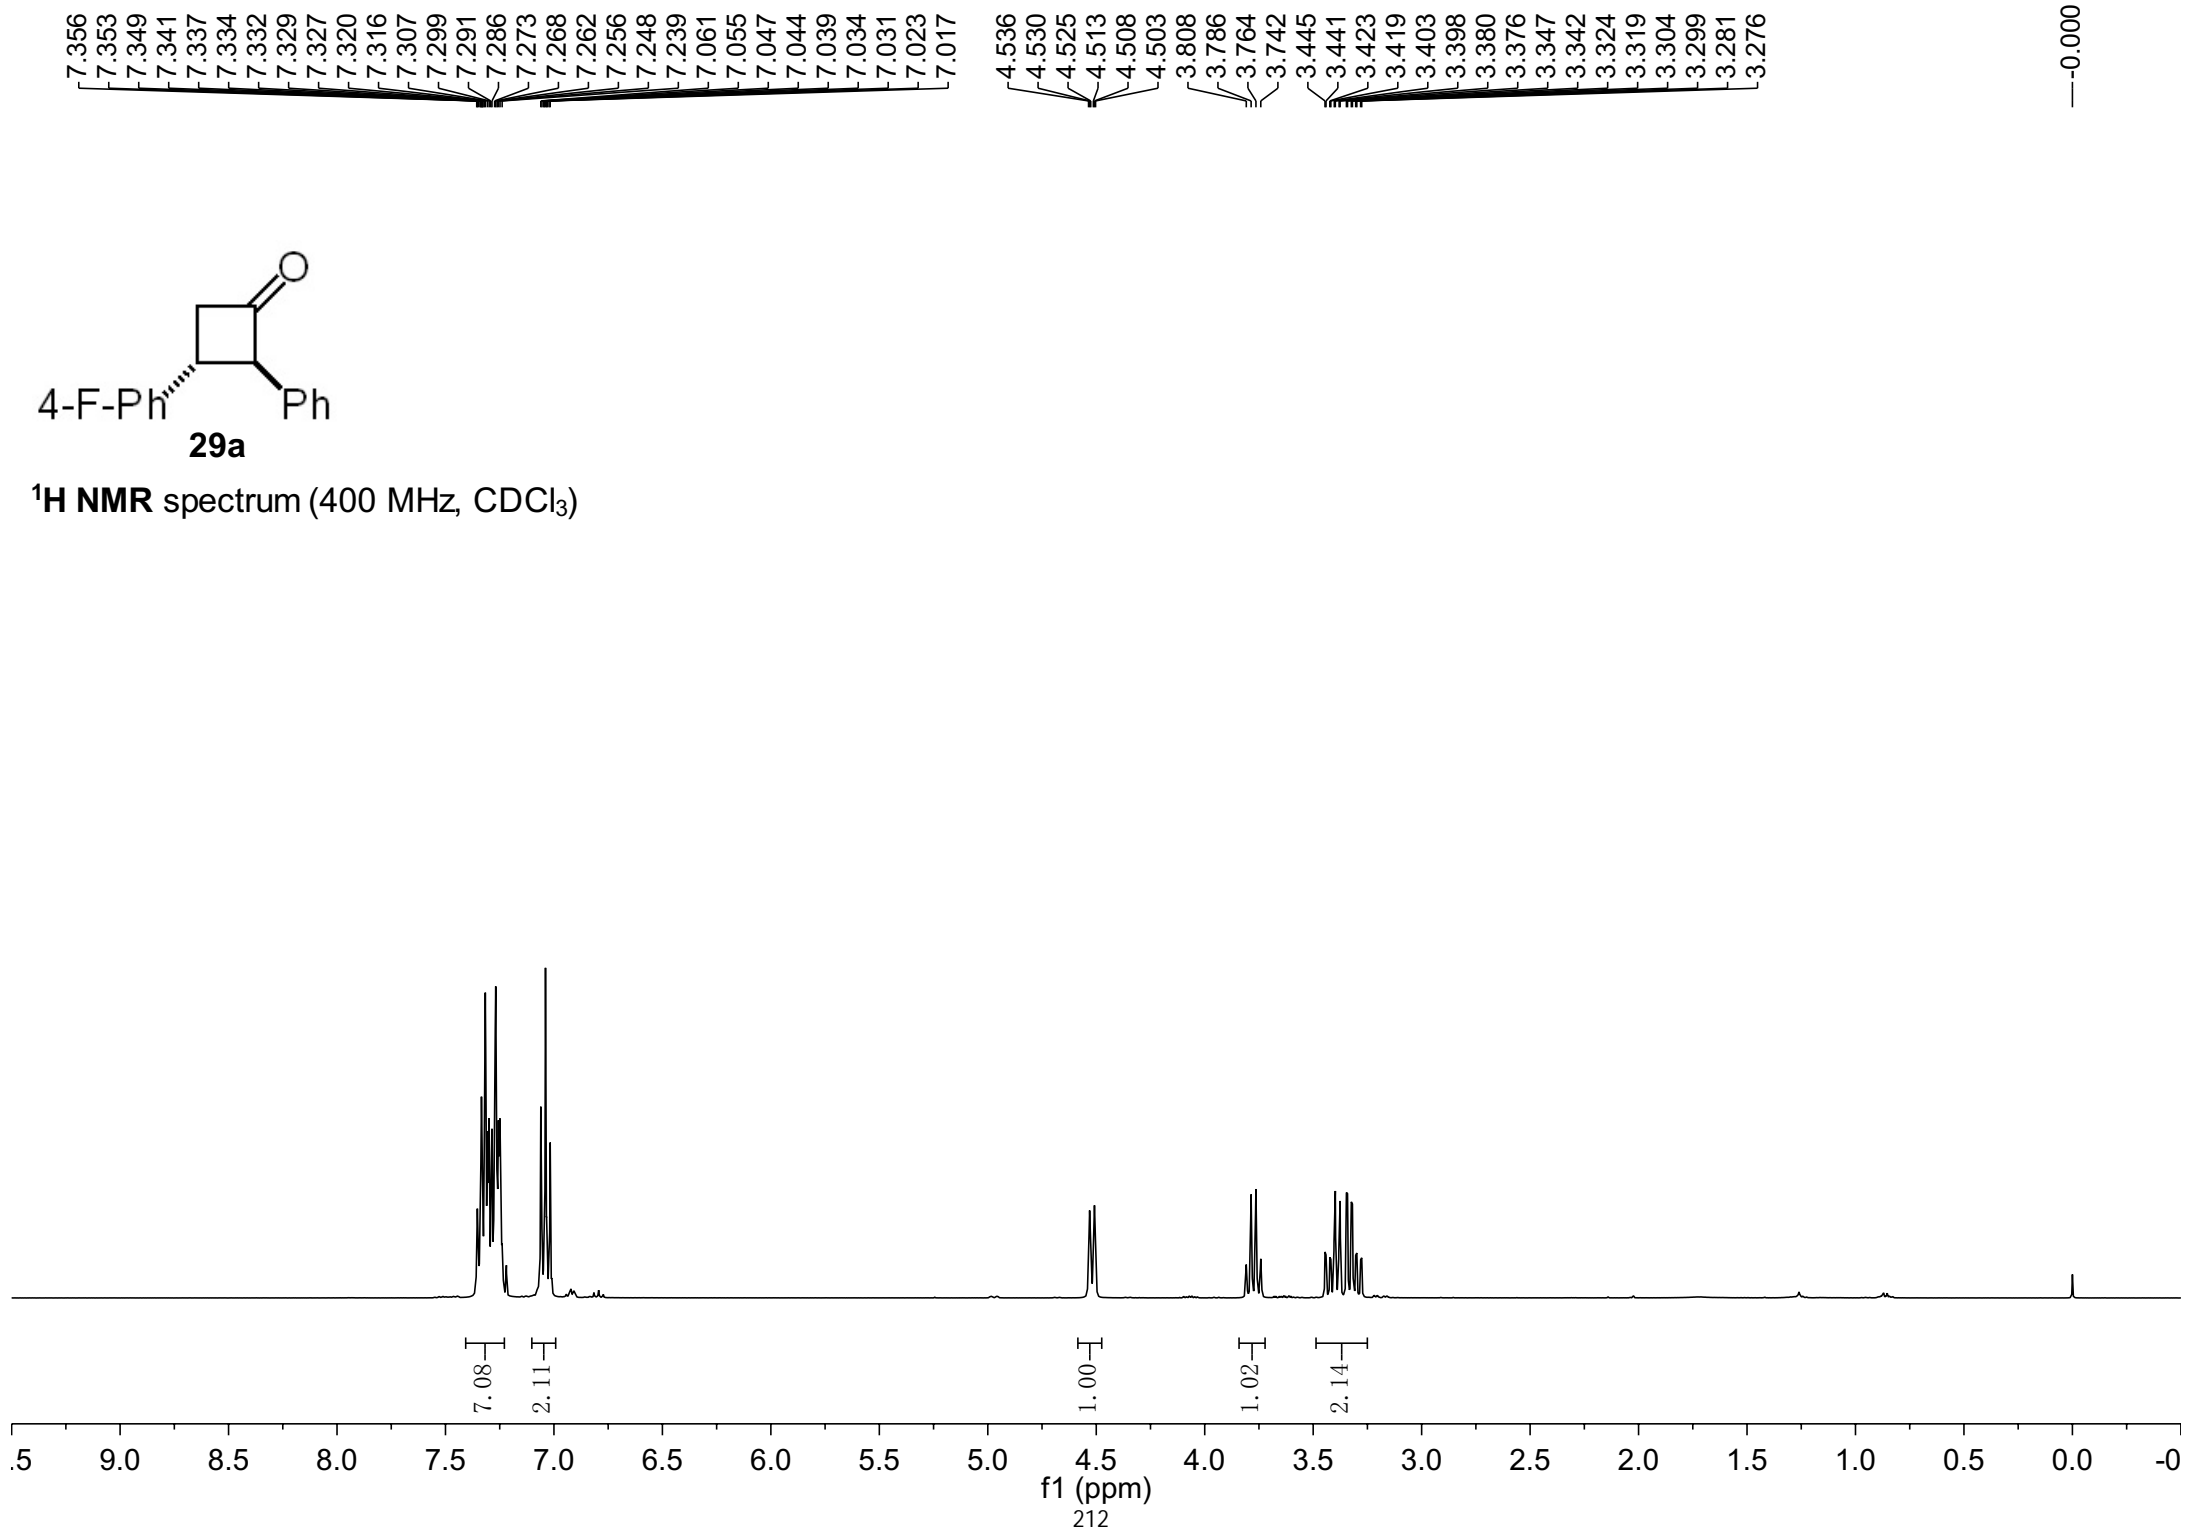

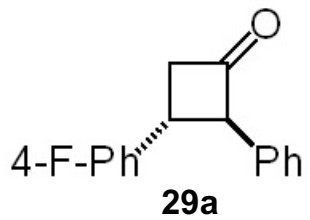

<sup>13</sup>C NMR spectrum (100 MHz, CDCl<sub>3</sub>)

— 204.54

— 162.90  
— 160.46

138.13  
138.10  
135.43  
128.74  
128.11  
128.03  
127.33  
126.96  
115.65  
115.44

77.32  
77.00  
76.68  
71.63

— 51.44

— 36.19

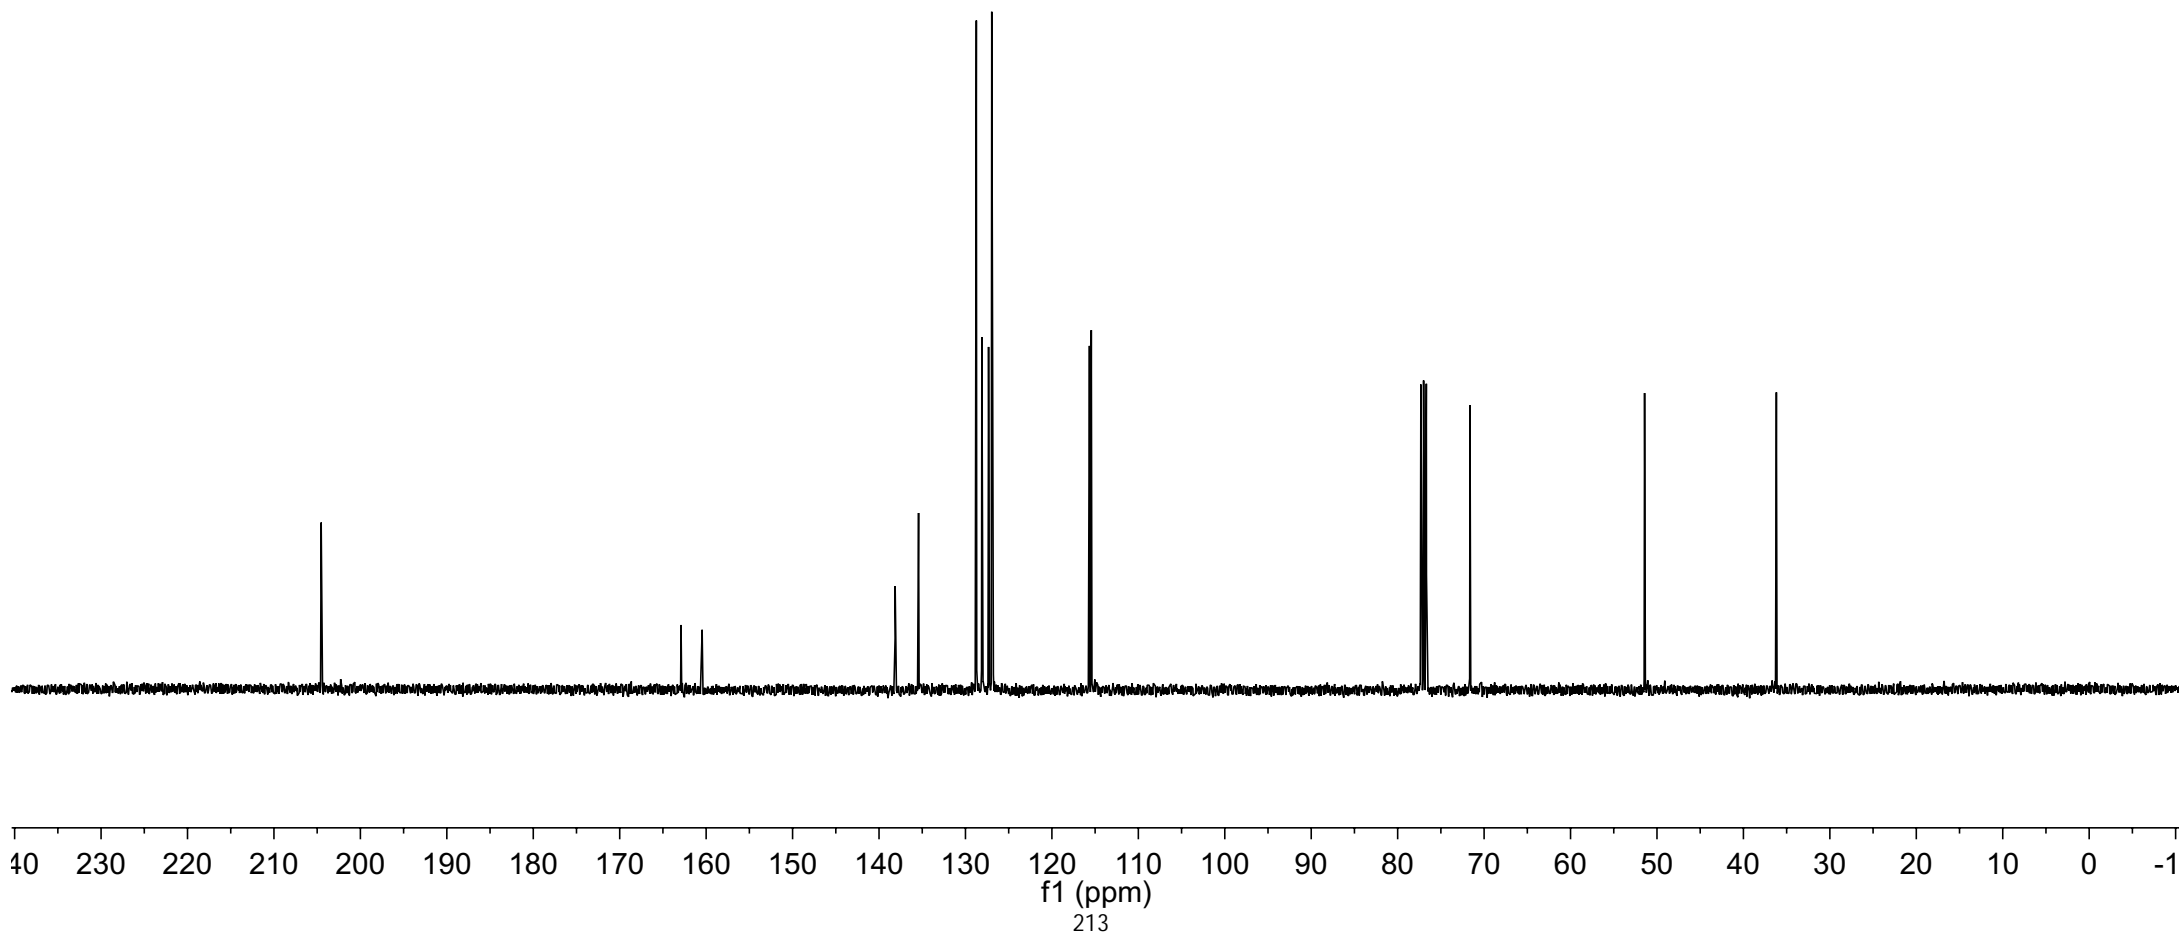

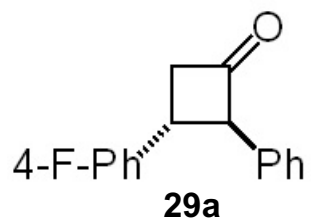

<sup>19</sup>F NMR spectrum (376 MHz, CDCl<sub>3</sub>)

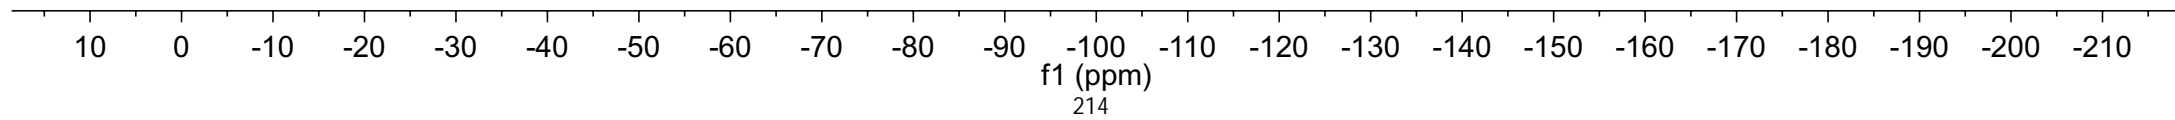

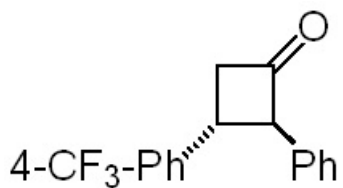

**30a**

<sup>1</sup>H NMR spectrum (400 MHz, CDCl<sub>3</sub>)

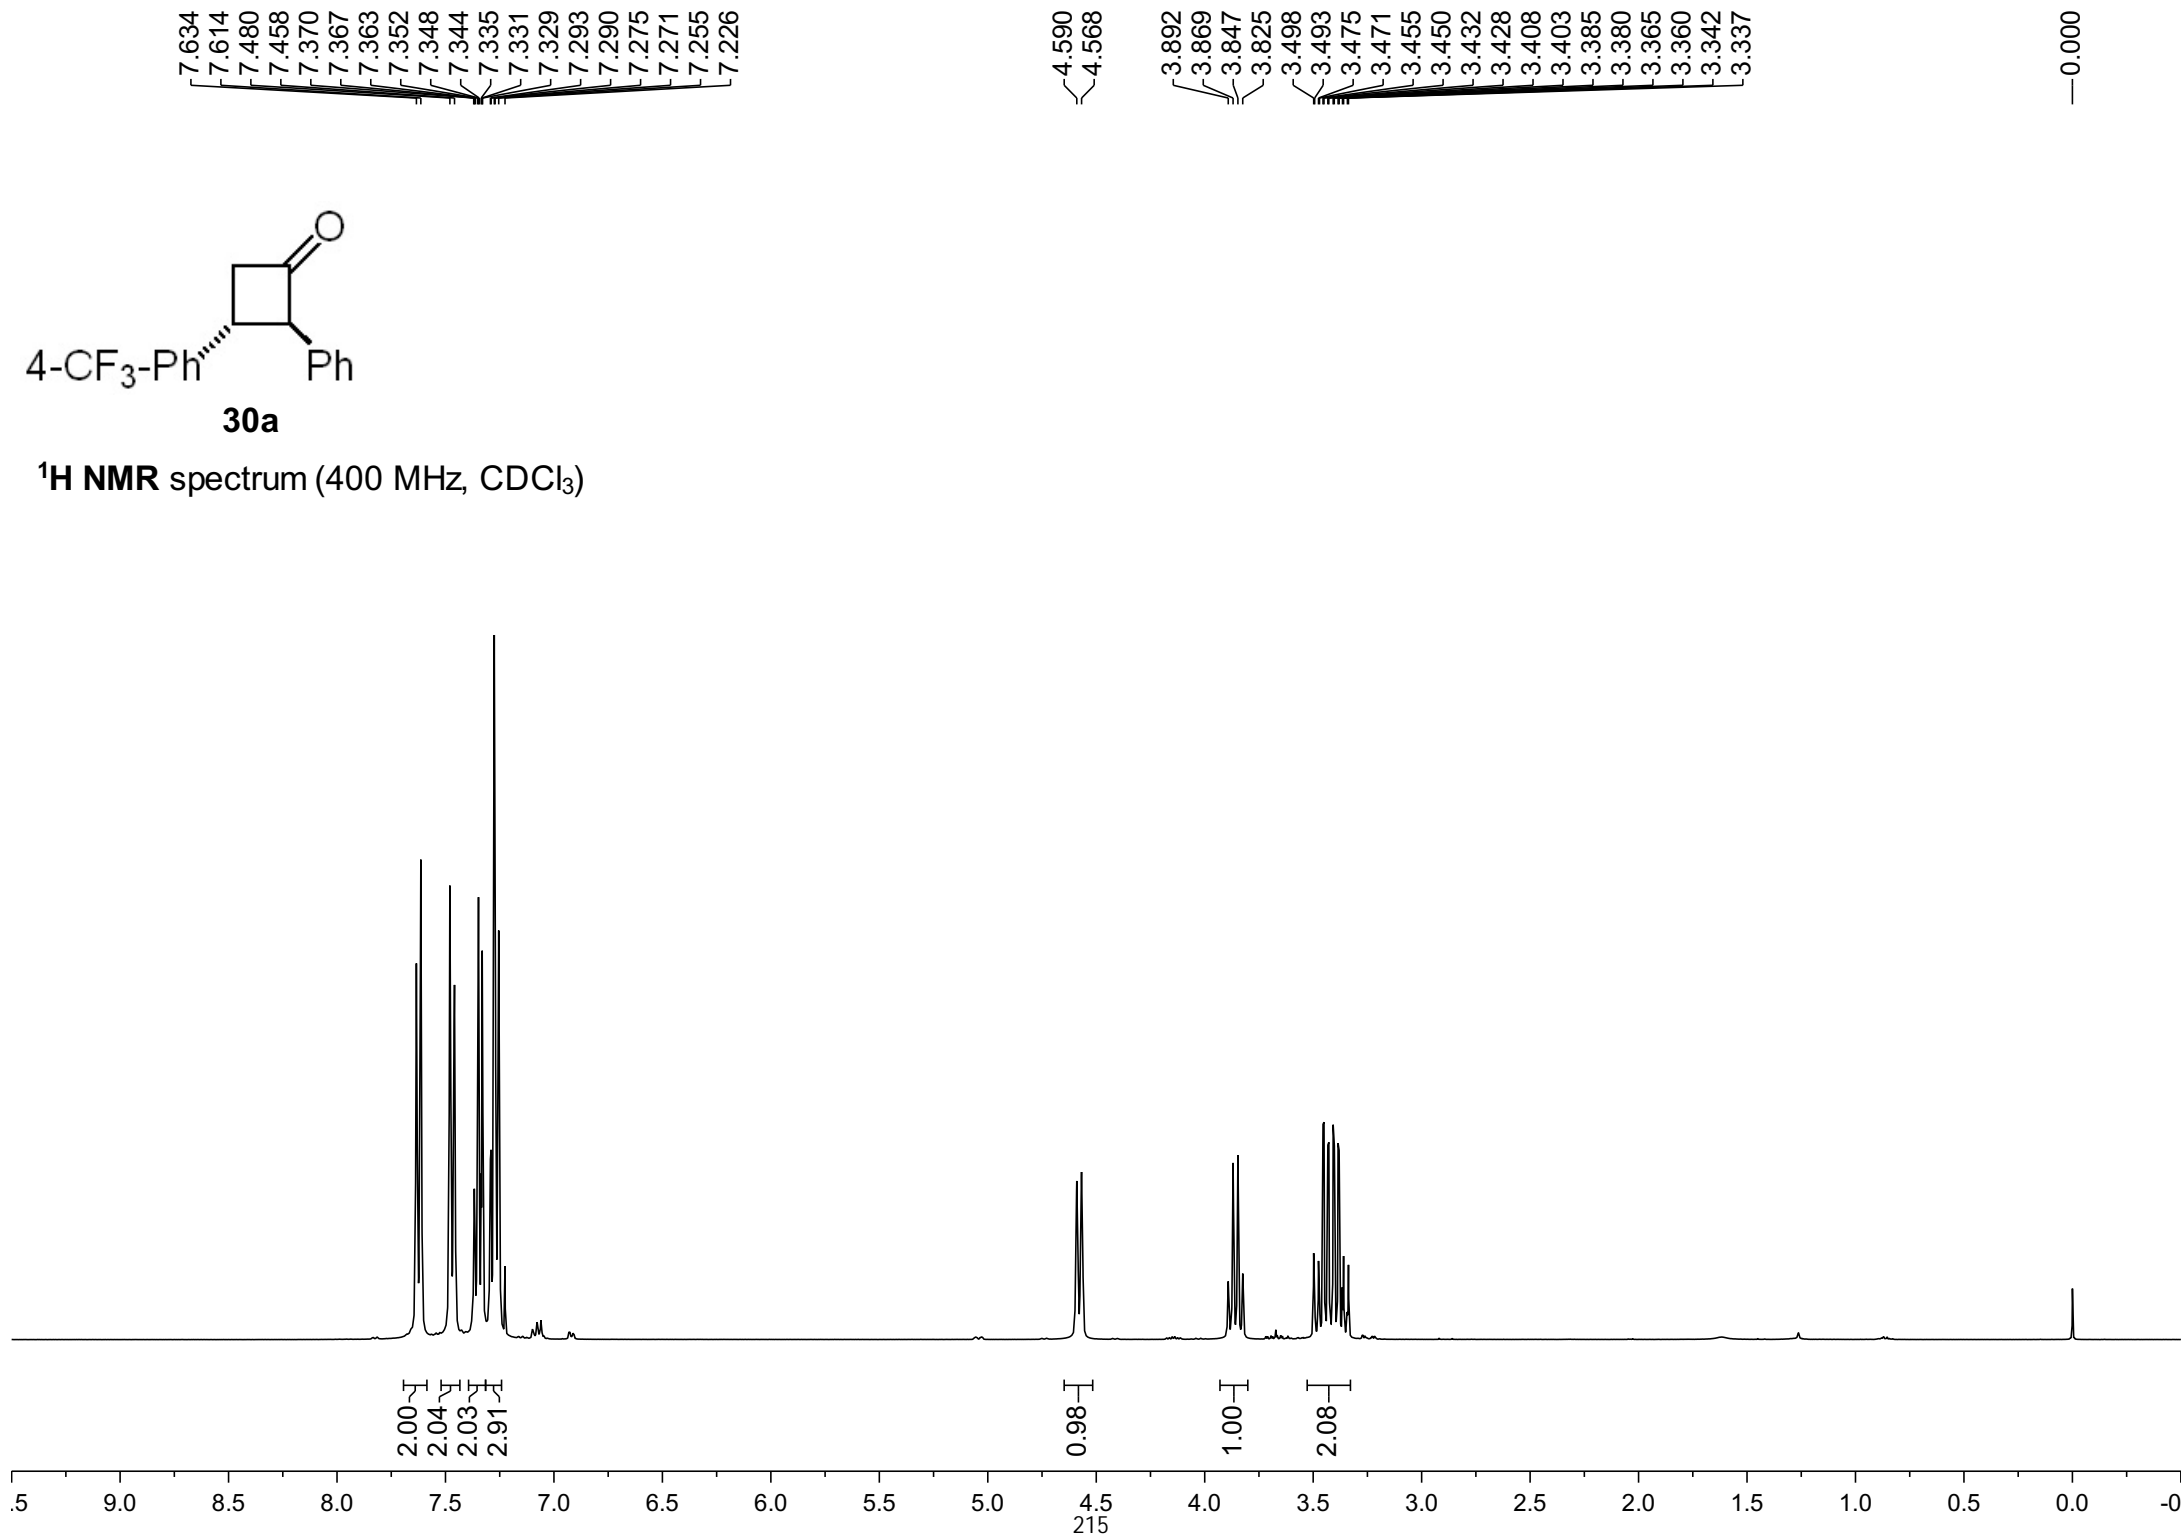

—203.92

146.41  
146.40  
135.18  
129.73  
129.41  
129.09  
128.84  
128.76  
127.51  
127.00  
126.97  
125.79  
125.75  
125.72  
125.68

77.32  
77.00  
76.68  
71.61

—51.23

—36.76

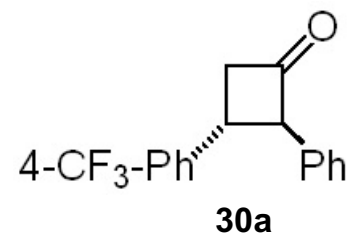

<sup>13</sup>C NMR spectrum (100 MHz, CDCl<sub>3</sub>)

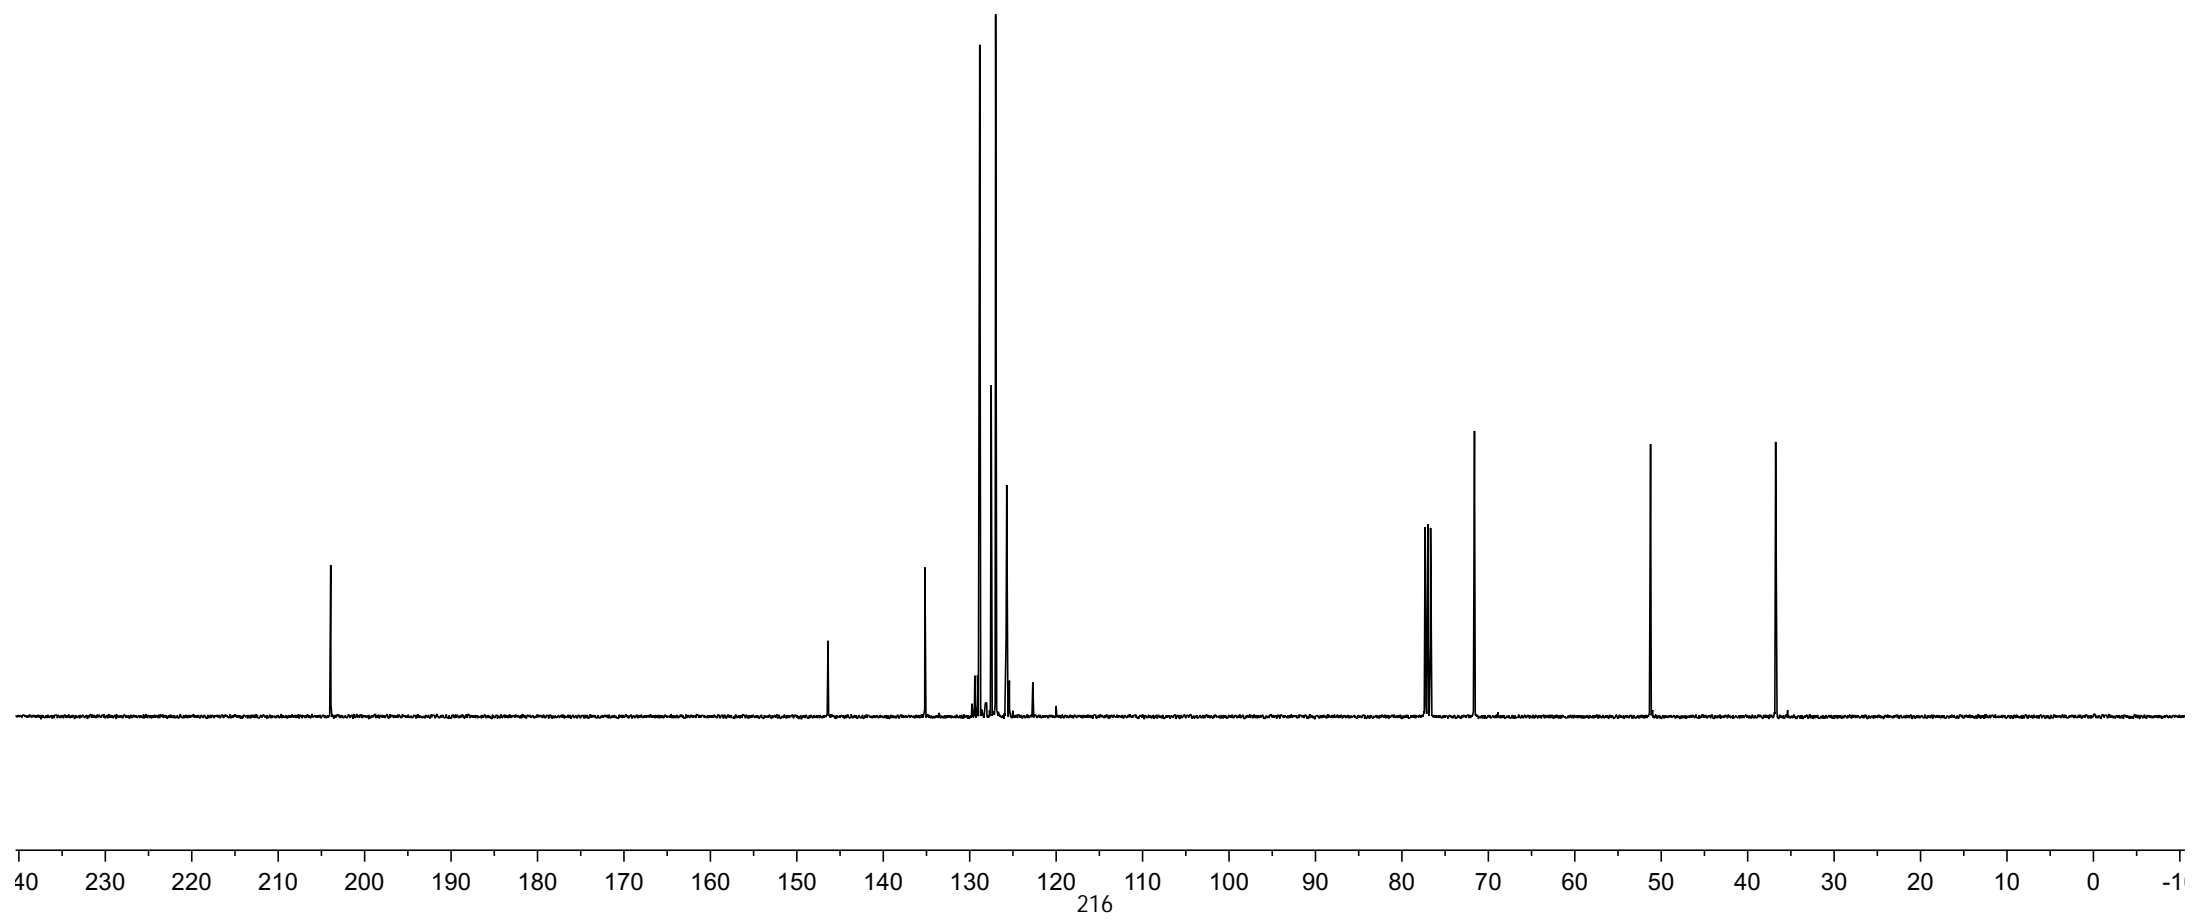

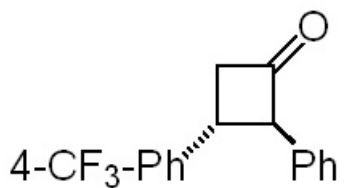

**30a**

<sup>19</sup>F NMR spectrum (376 MHz, CDCl<sub>3</sub>)

62.39

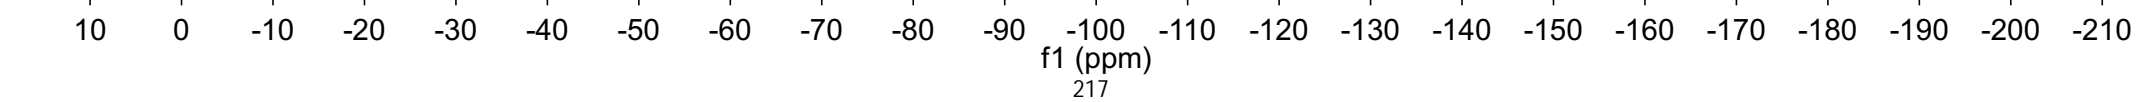

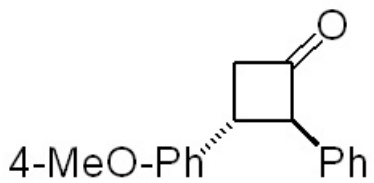

**31a**

<sup>1</sup>H NMR spectrum (600 MHz, CDCl<sub>3</sub>)

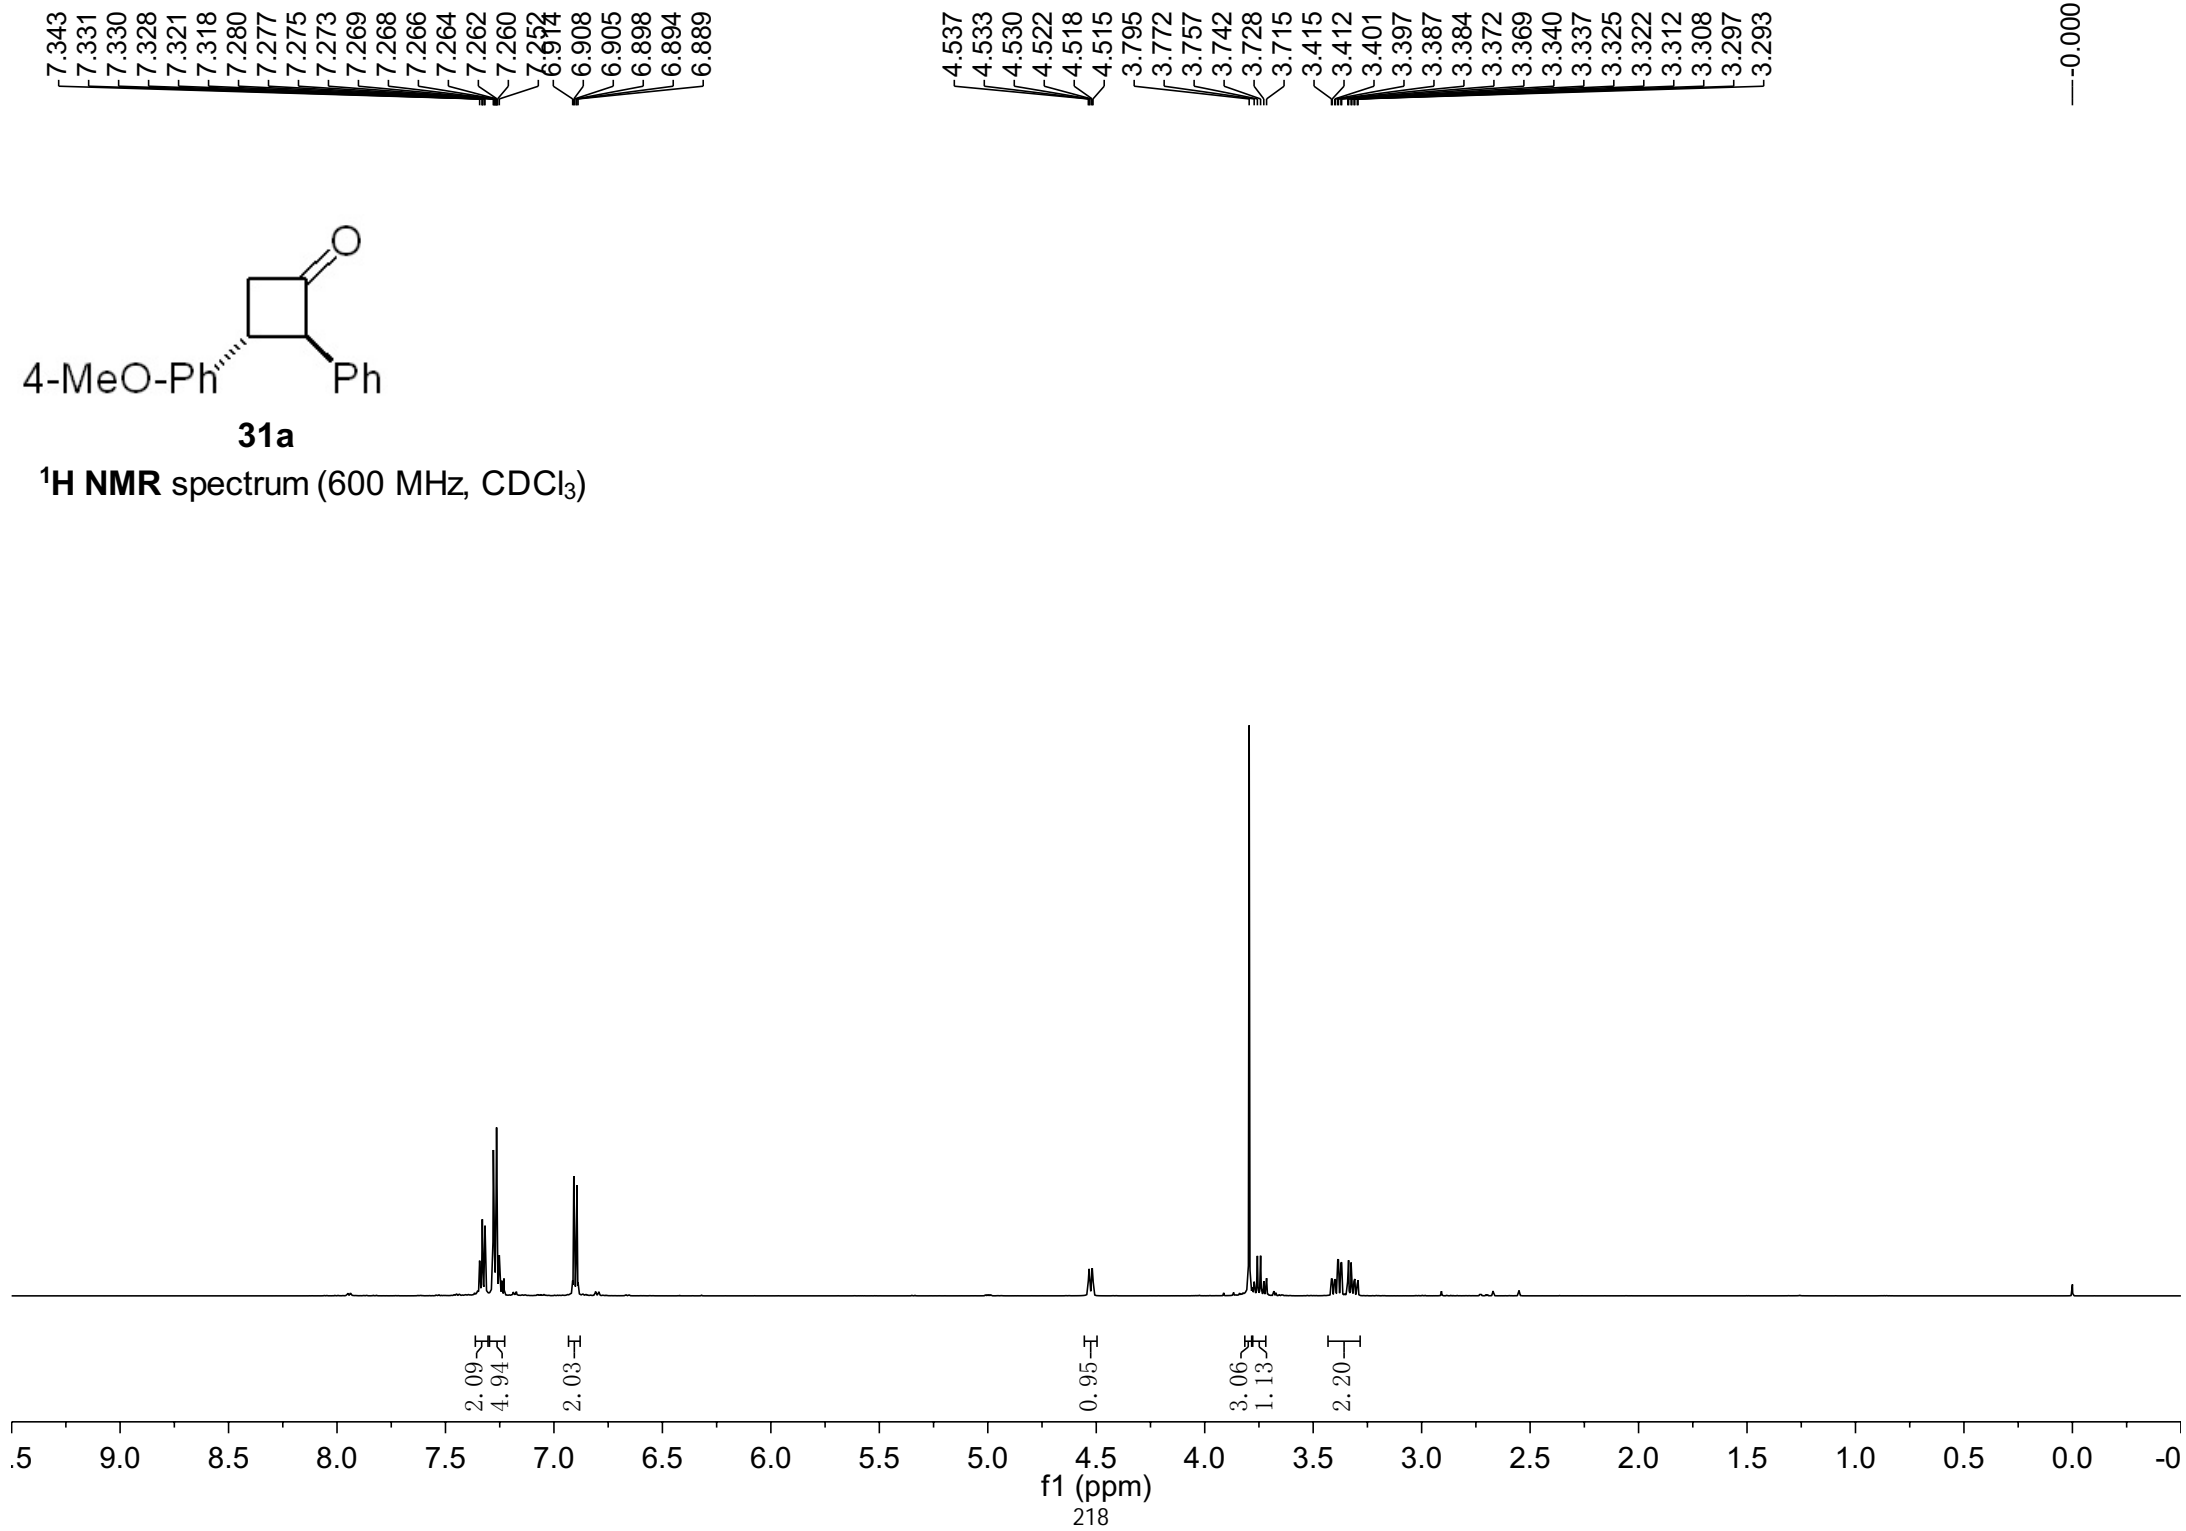

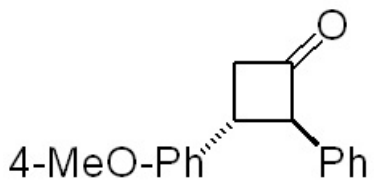

**31a**

<sup>13</sup>C NMR spectrum (150 MHz, CDCl<sub>3</sub>)

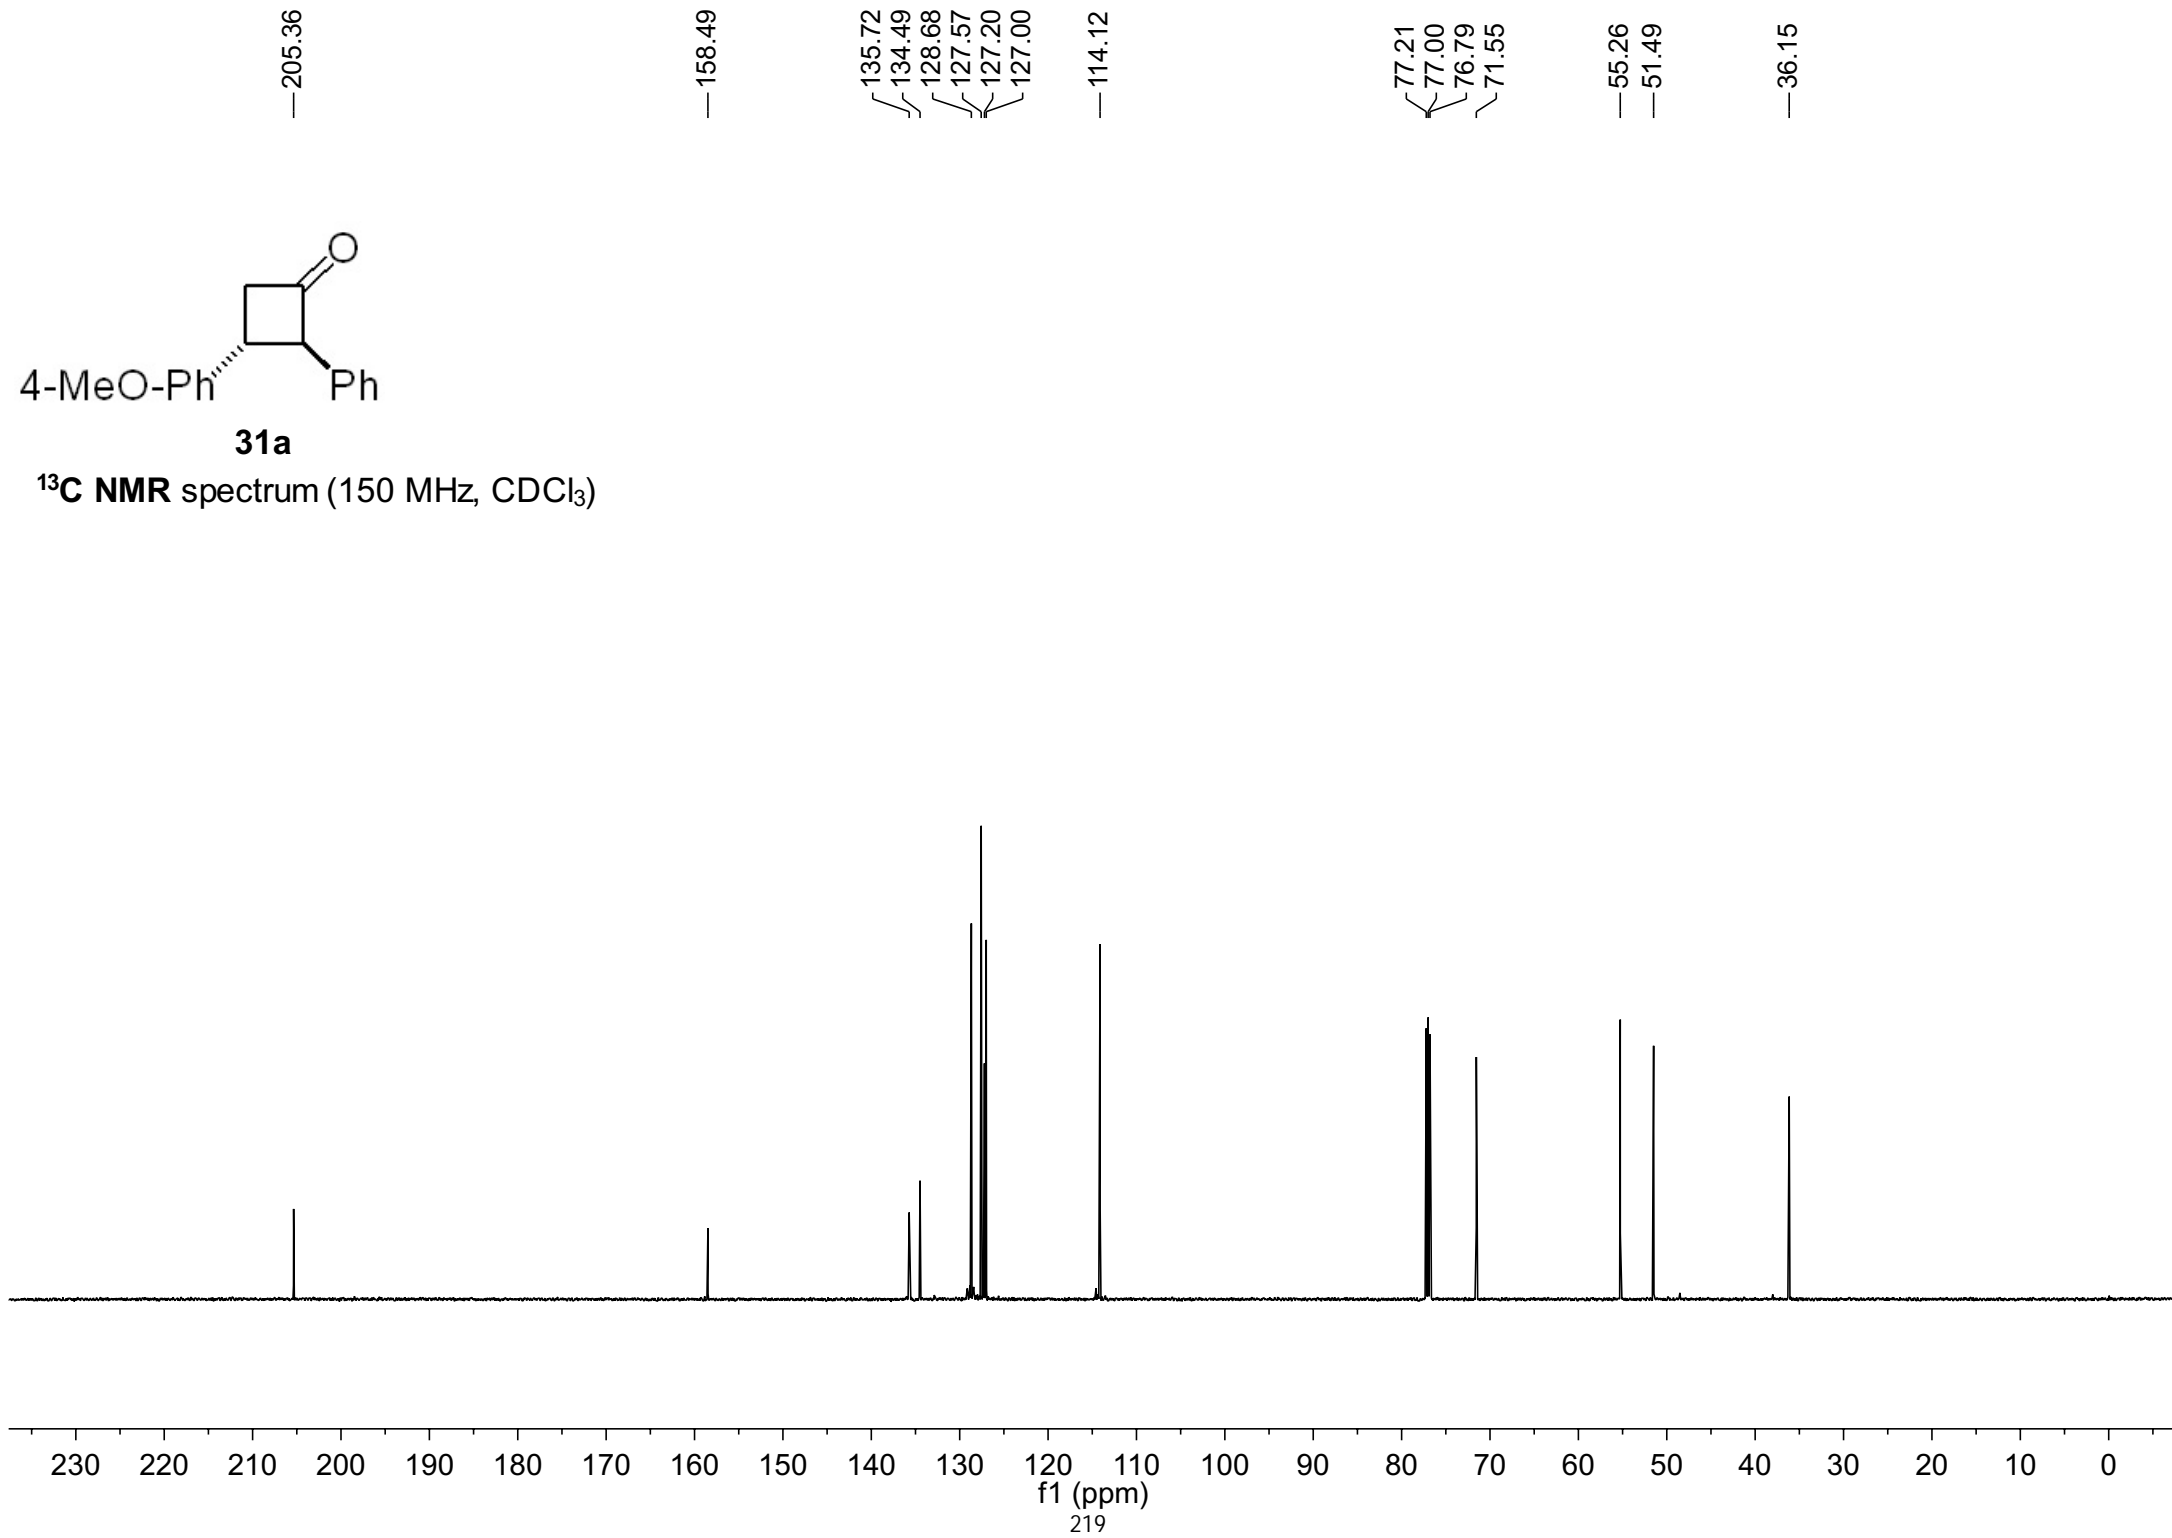



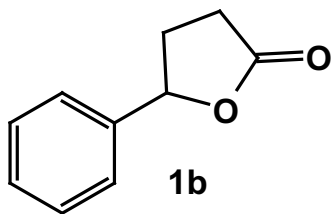

<sup>1</sup>H NMR spectrum (400 MHz, CDCl<sub>3</sub>)

7.405  
7.401  
7.397  
7.387  
7.381  
7.379  
7.374  
7.364  
7.344  
7.333  
7.327  
7.315  
7.262

5.515  
5.499  
5.495  
5.479

2.692  
2.678  
2.670  
2.664  
2.655  
2.644  
2.632  
2.625  
2.617  
2.613  
2.602  
2.240  
2.215  
2.211  
2.208  
2.199  
2.193  
2.190  
2.181  
2.170  
2.158  
2.150  
2.138  
2.131  
2.117  
2.098

—0.000

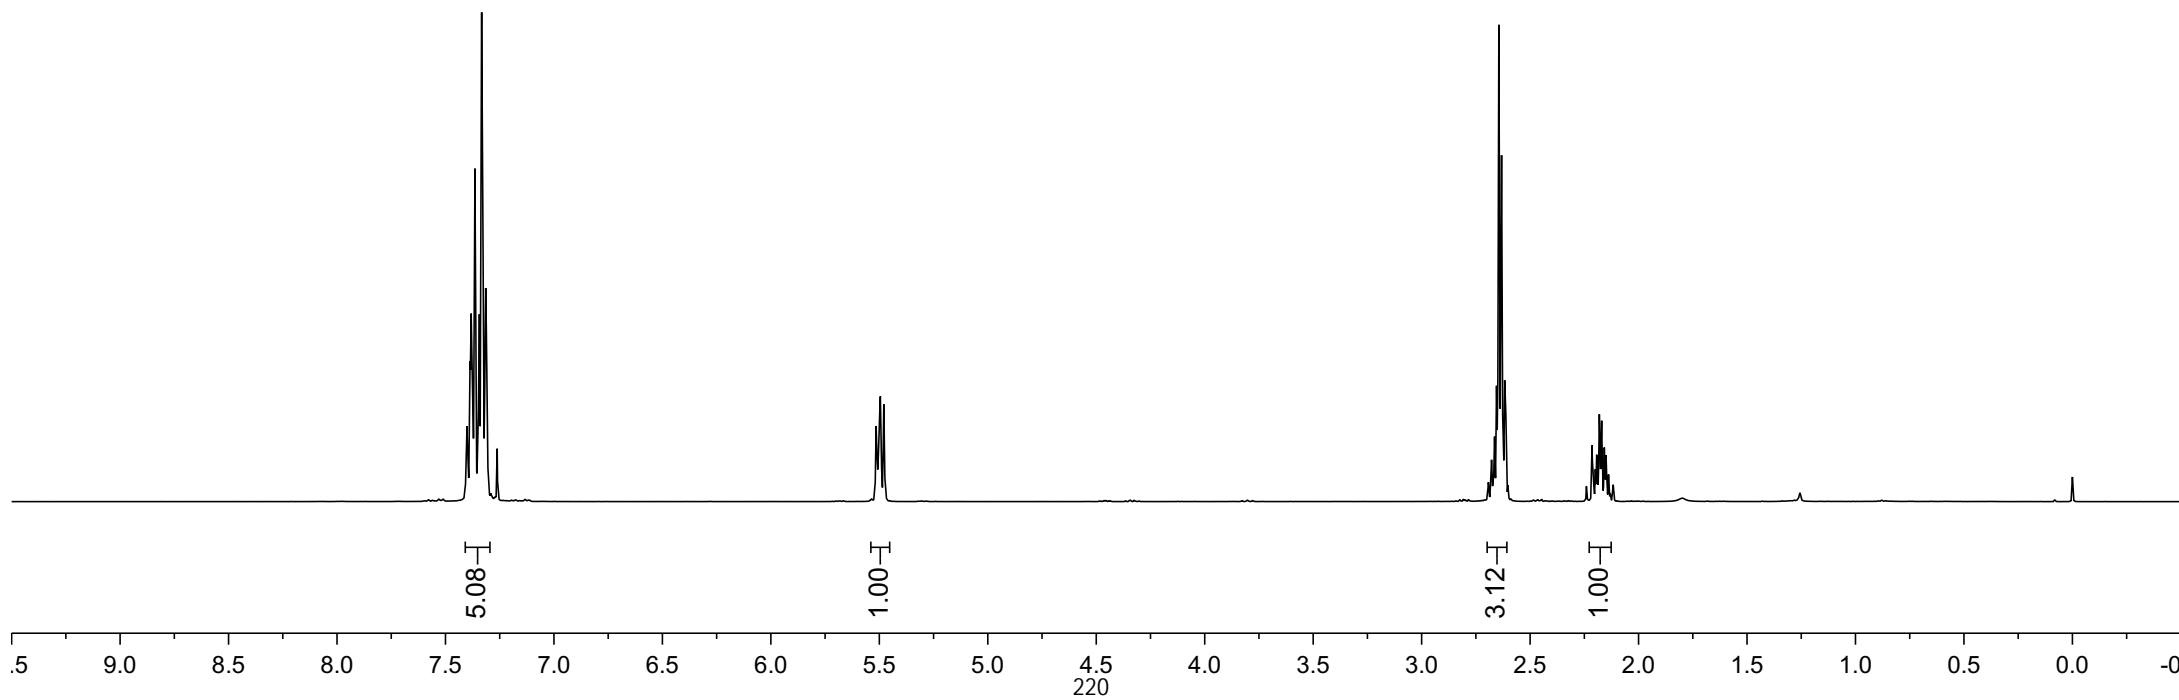

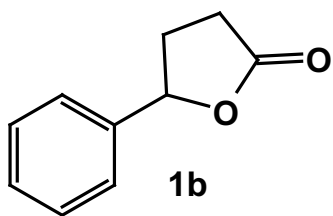

<sup>13</sup>C NMR spectrum (100 MHz, CDCl<sub>3</sub>)

— 176.82

— 139.26

128.62

128.31

125.17

81.12

77.32

77.00

76.68

30.83

28.84

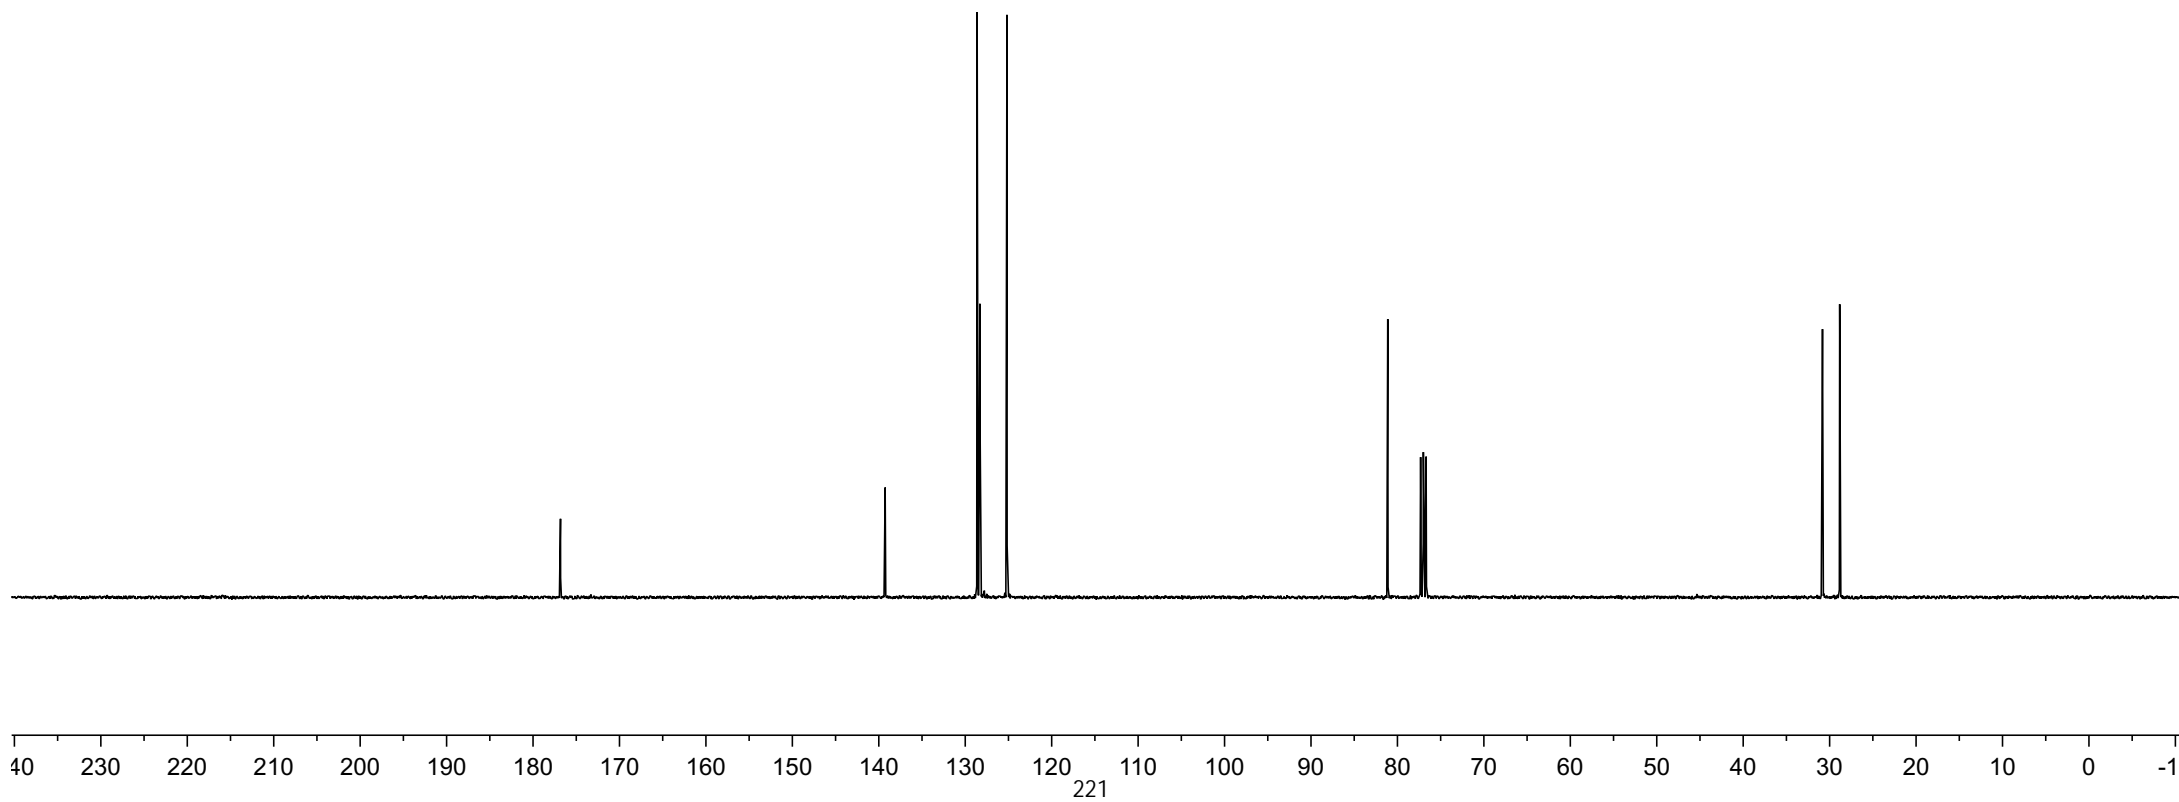

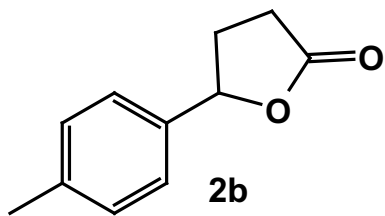

<sup>1</sup>H NMR spectrum (600 MHz, CDCl<sub>3</sub>)

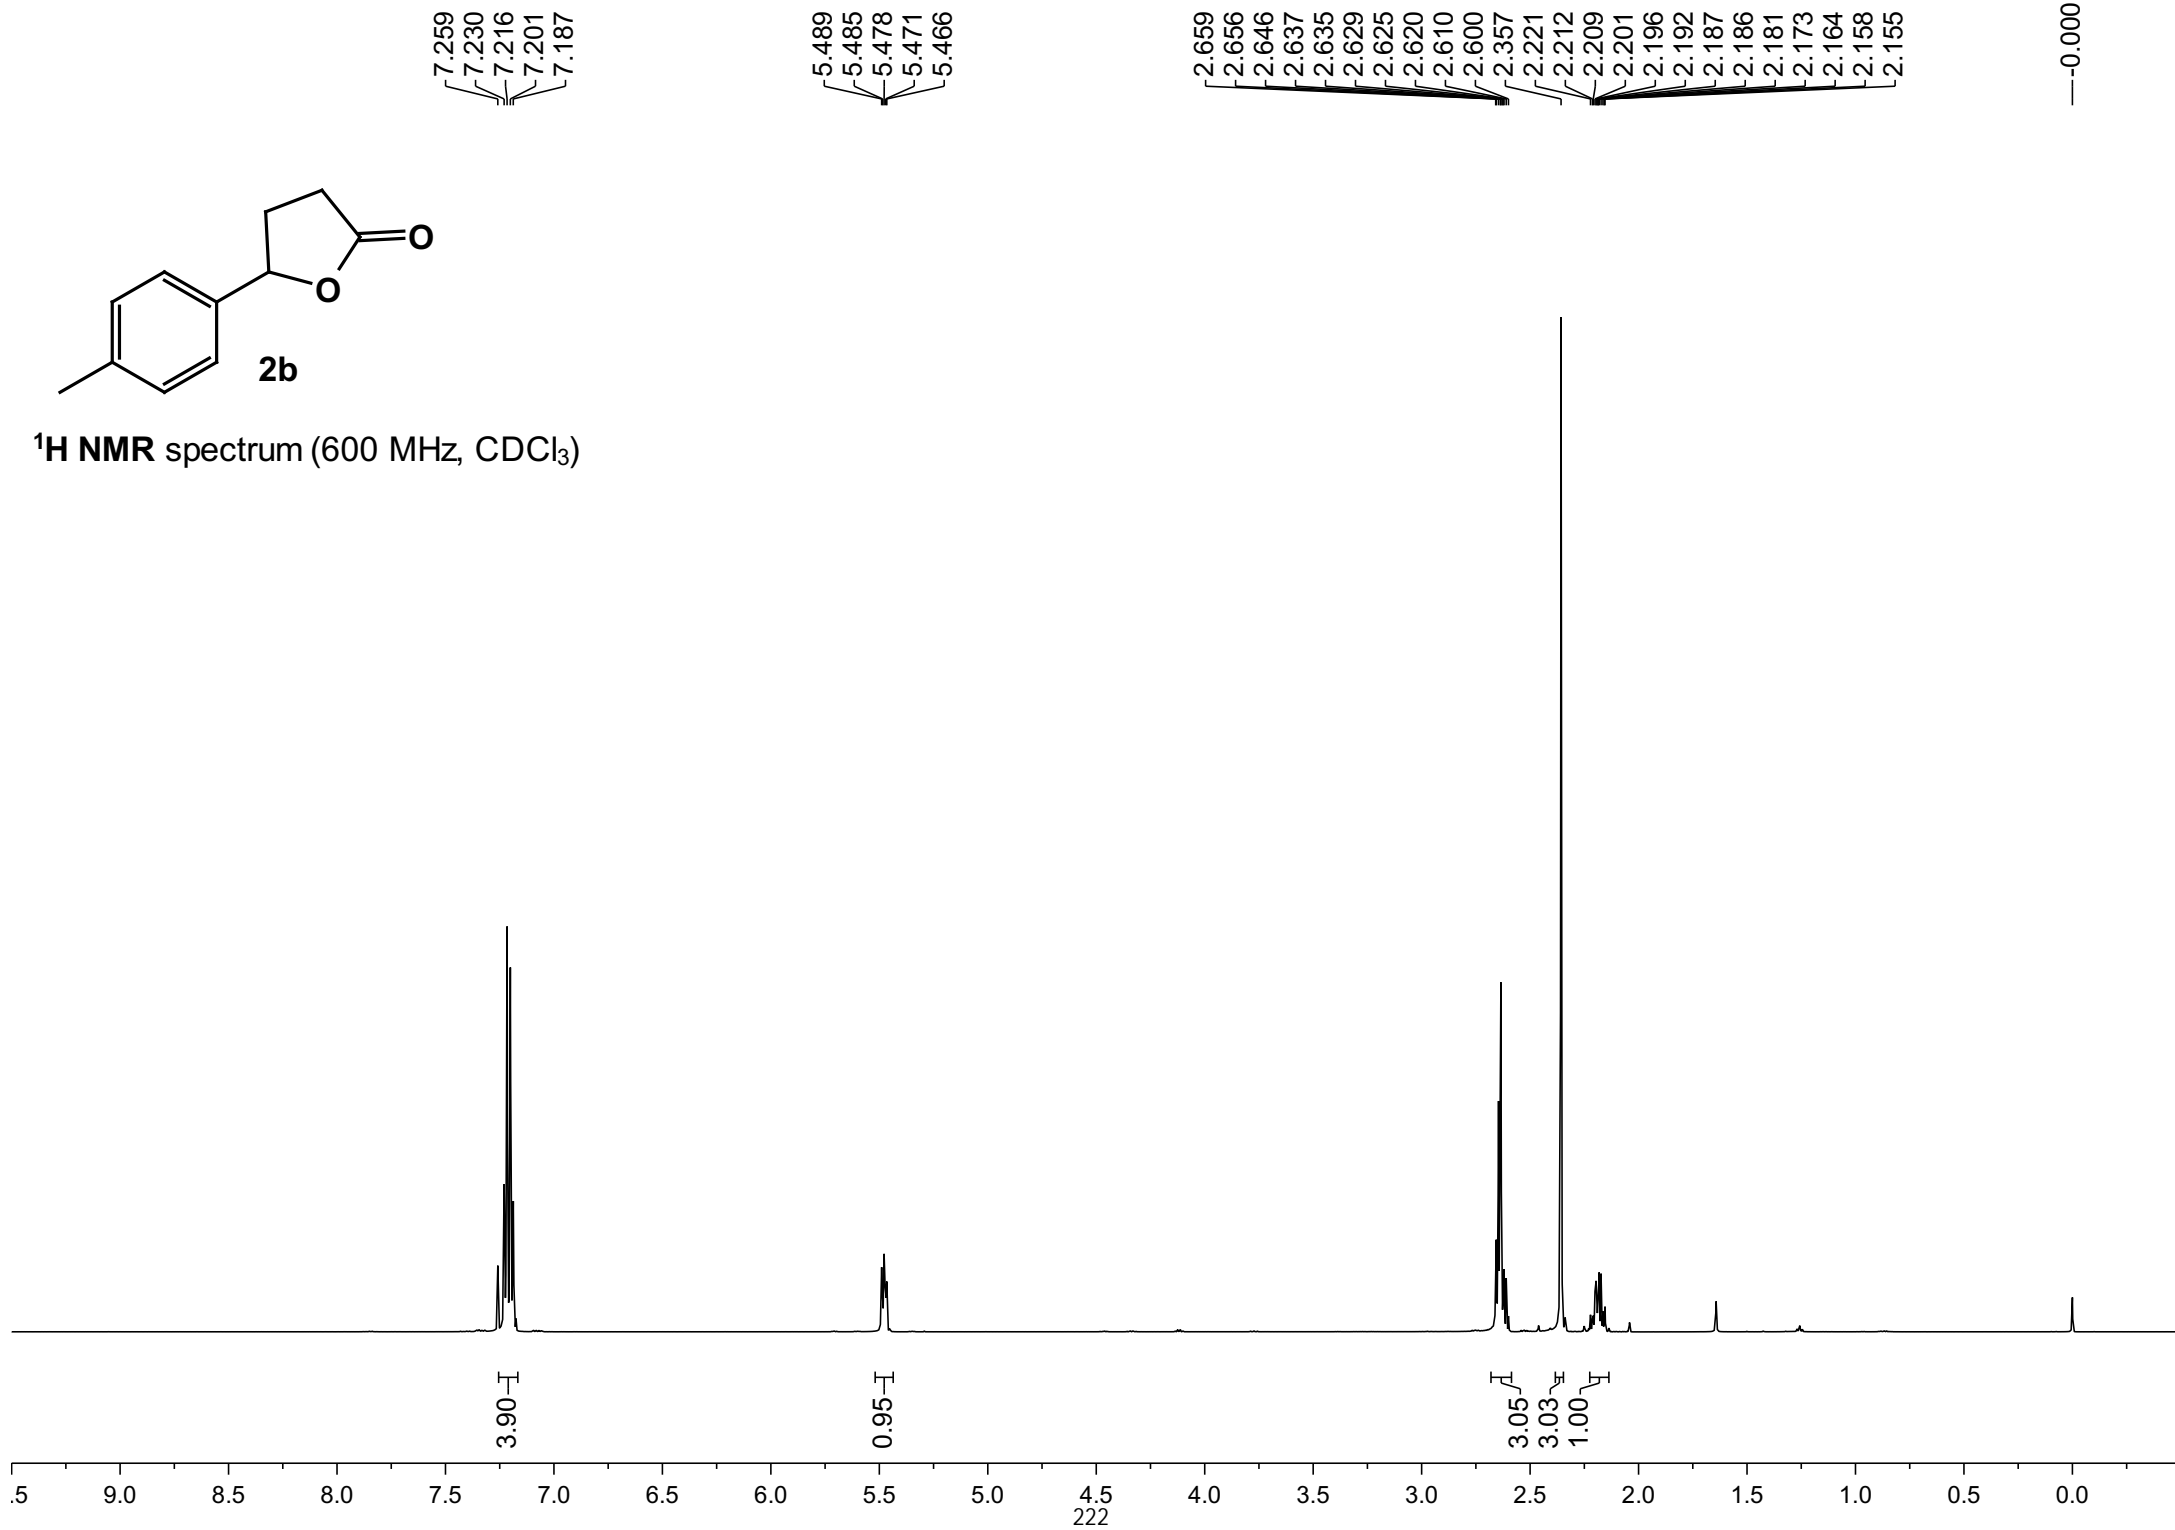



<sup>13</sup>C NMR spectrum (150 MHz, CDCl<sub>3</sub>)

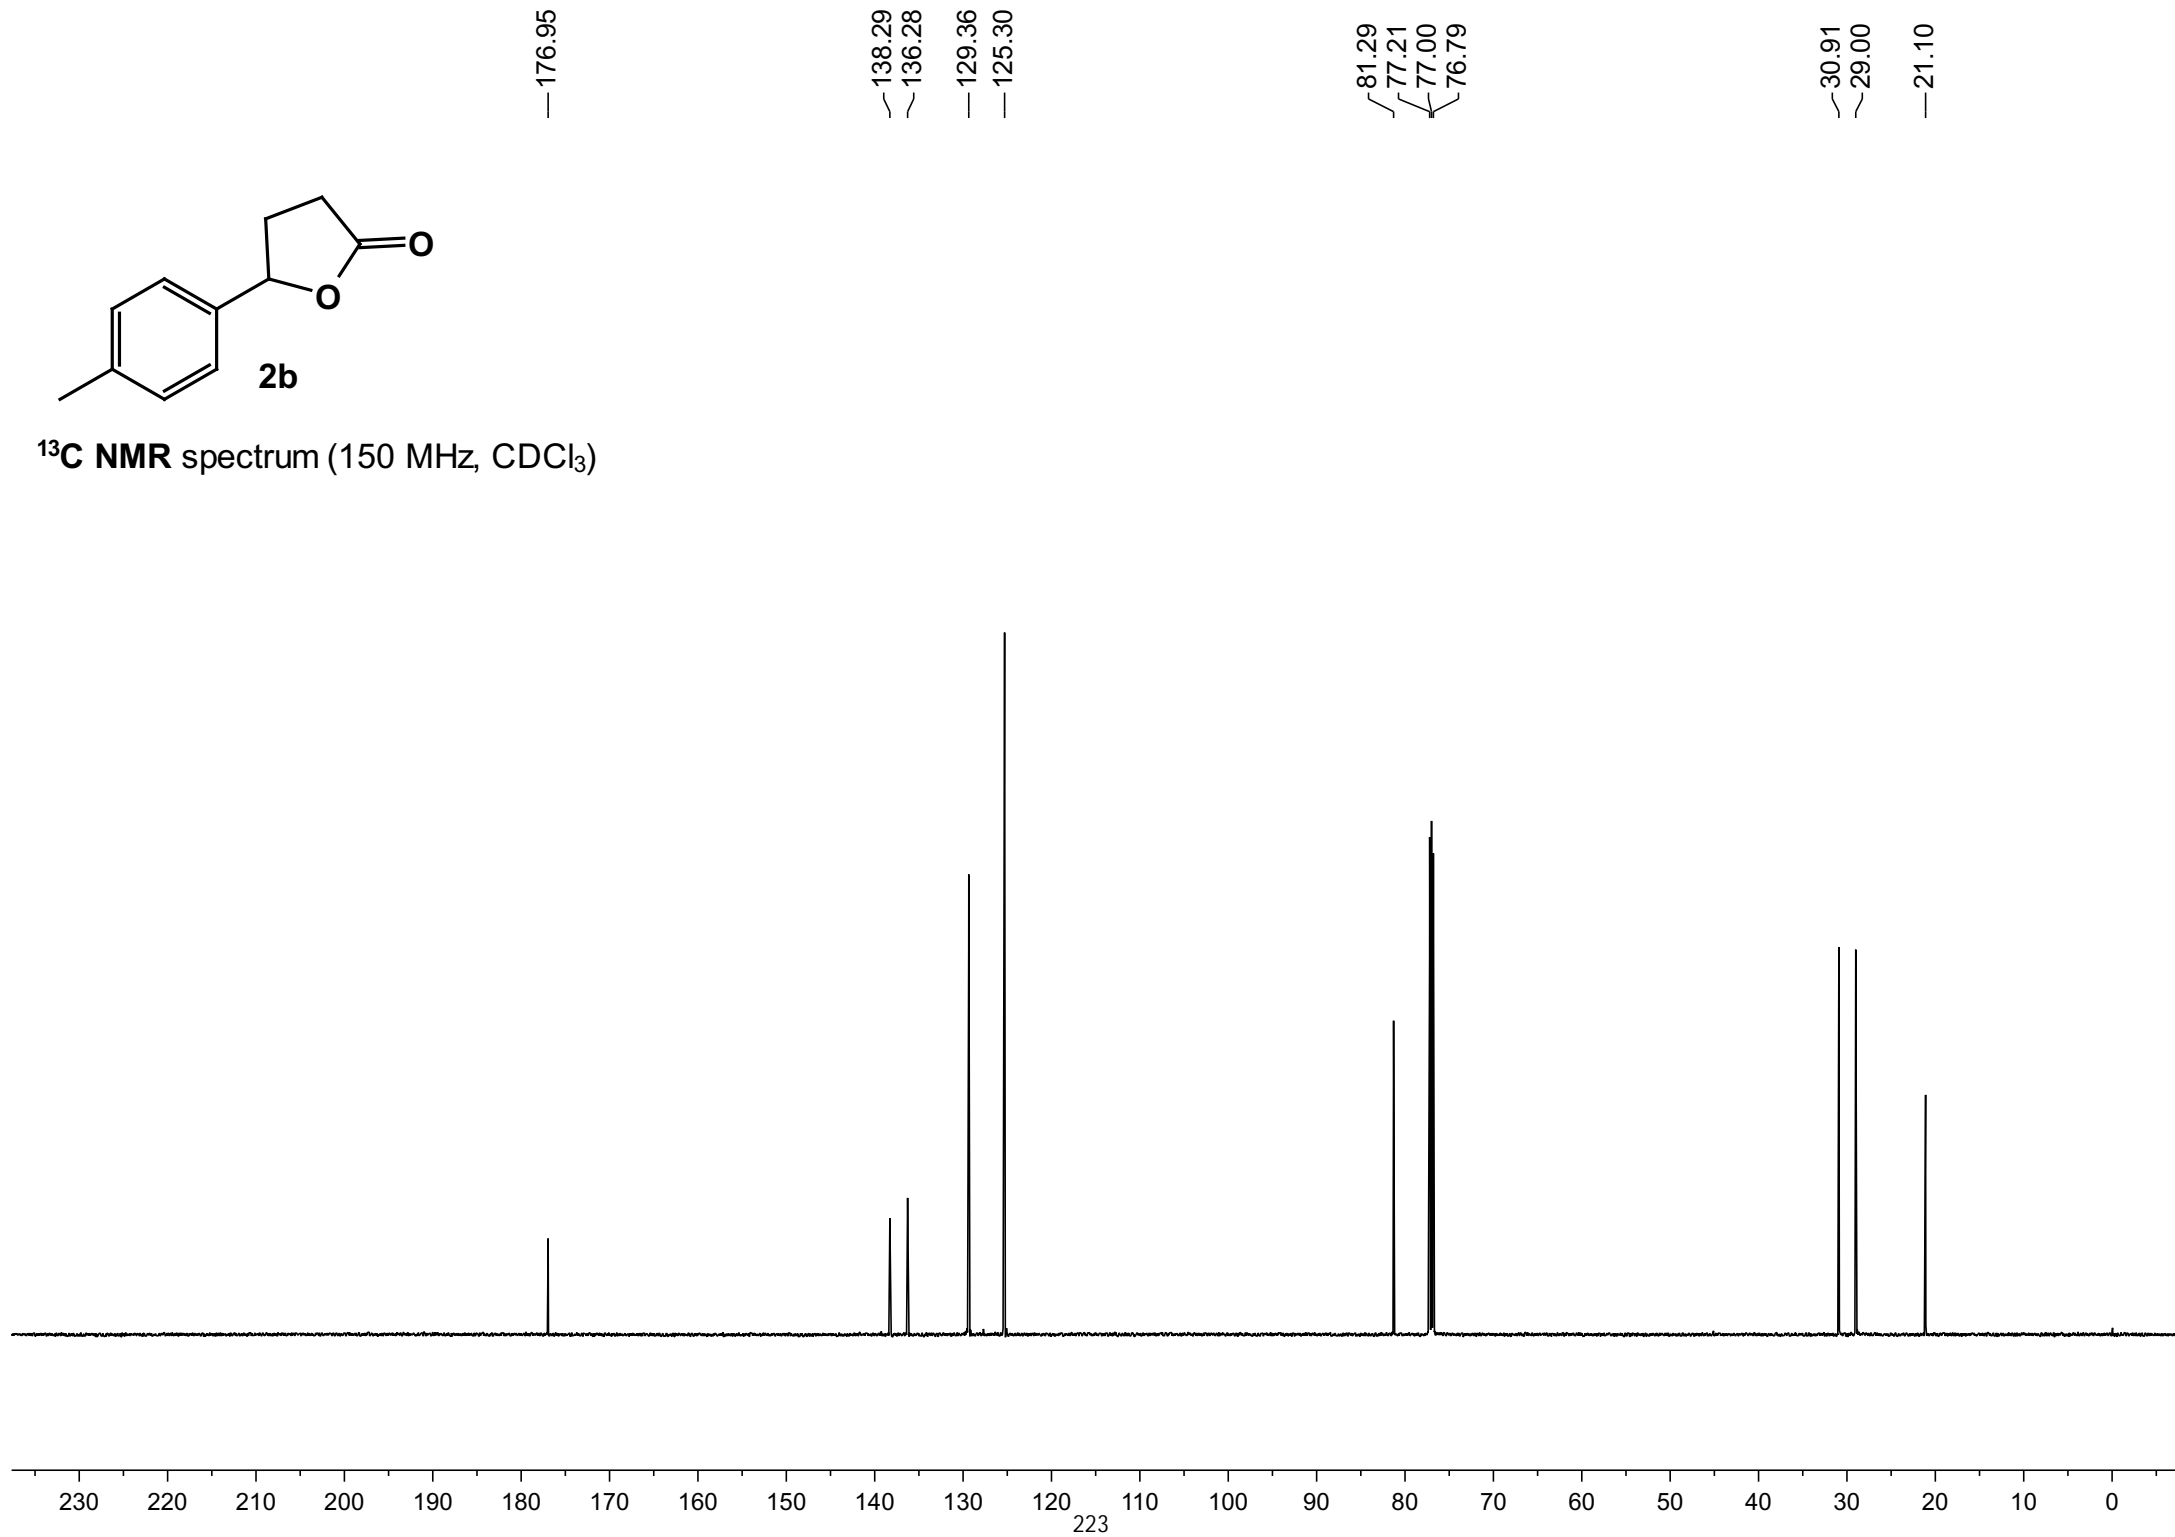

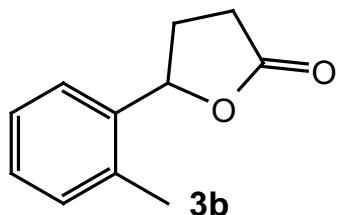

<sup>1</sup>H NMR spectrum (600 MHz, CDCl<sub>3</sub>)

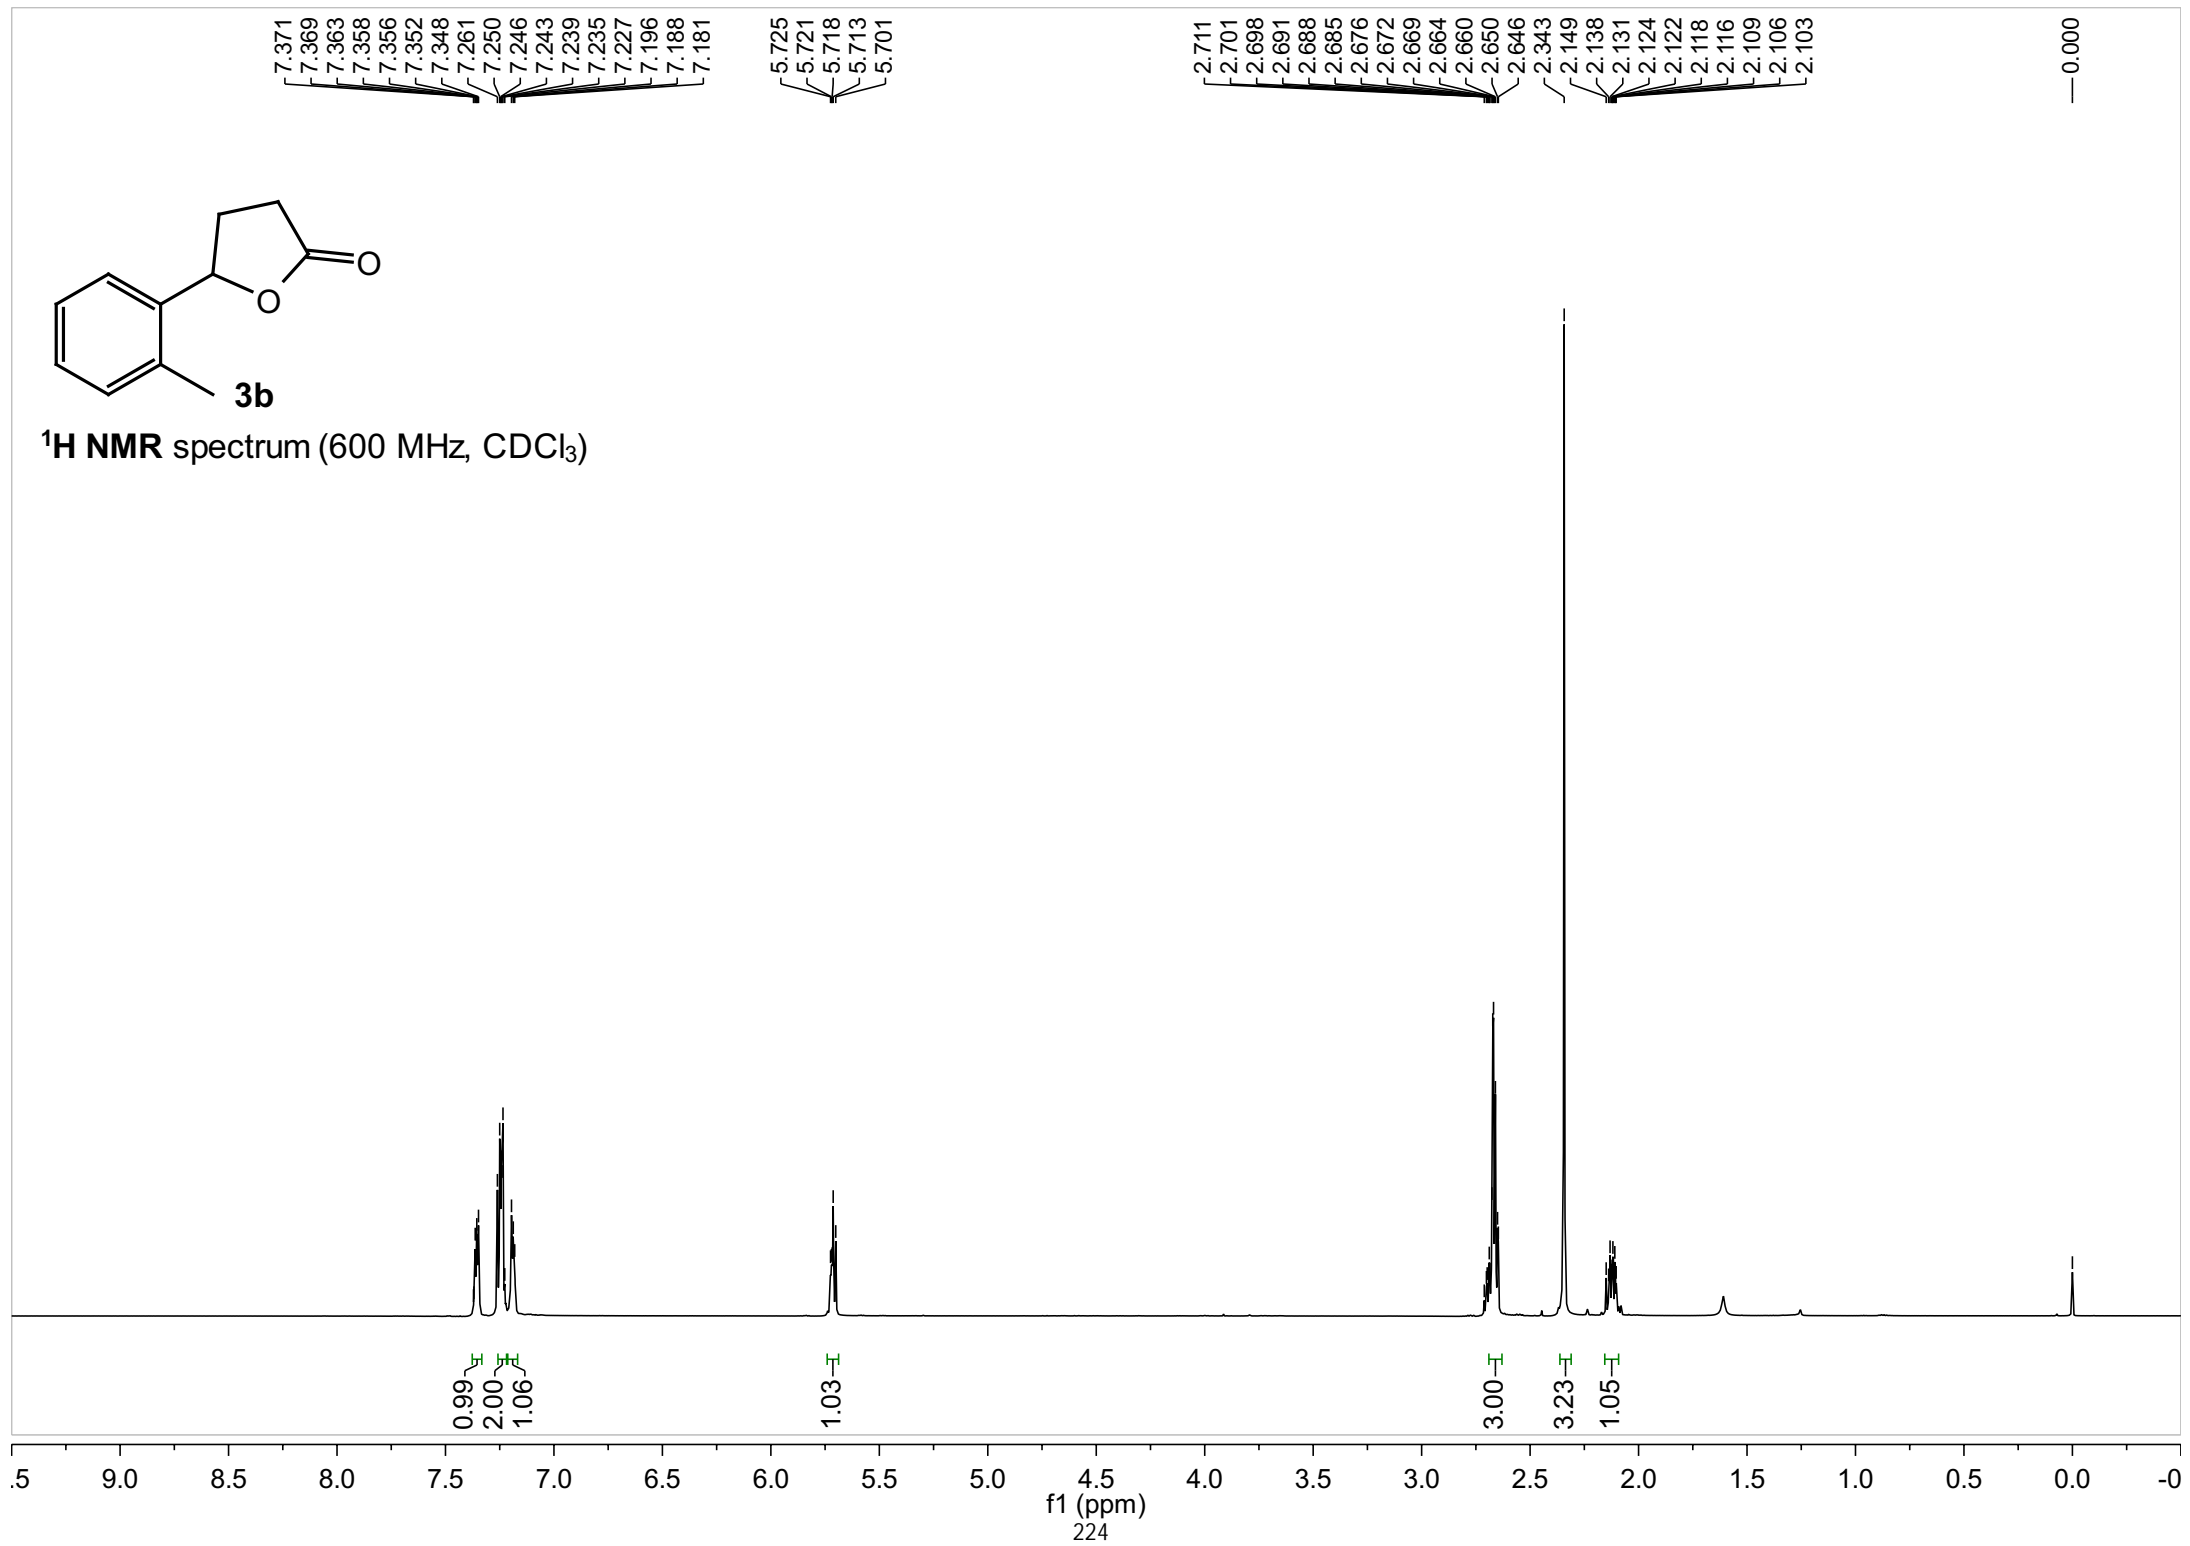

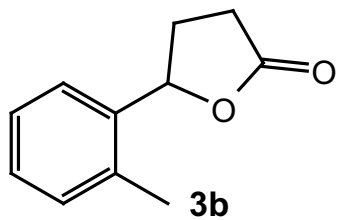

<sup>13</sup>C NMR spectrum (150 MHz, CDCl<sub>3</sub>)

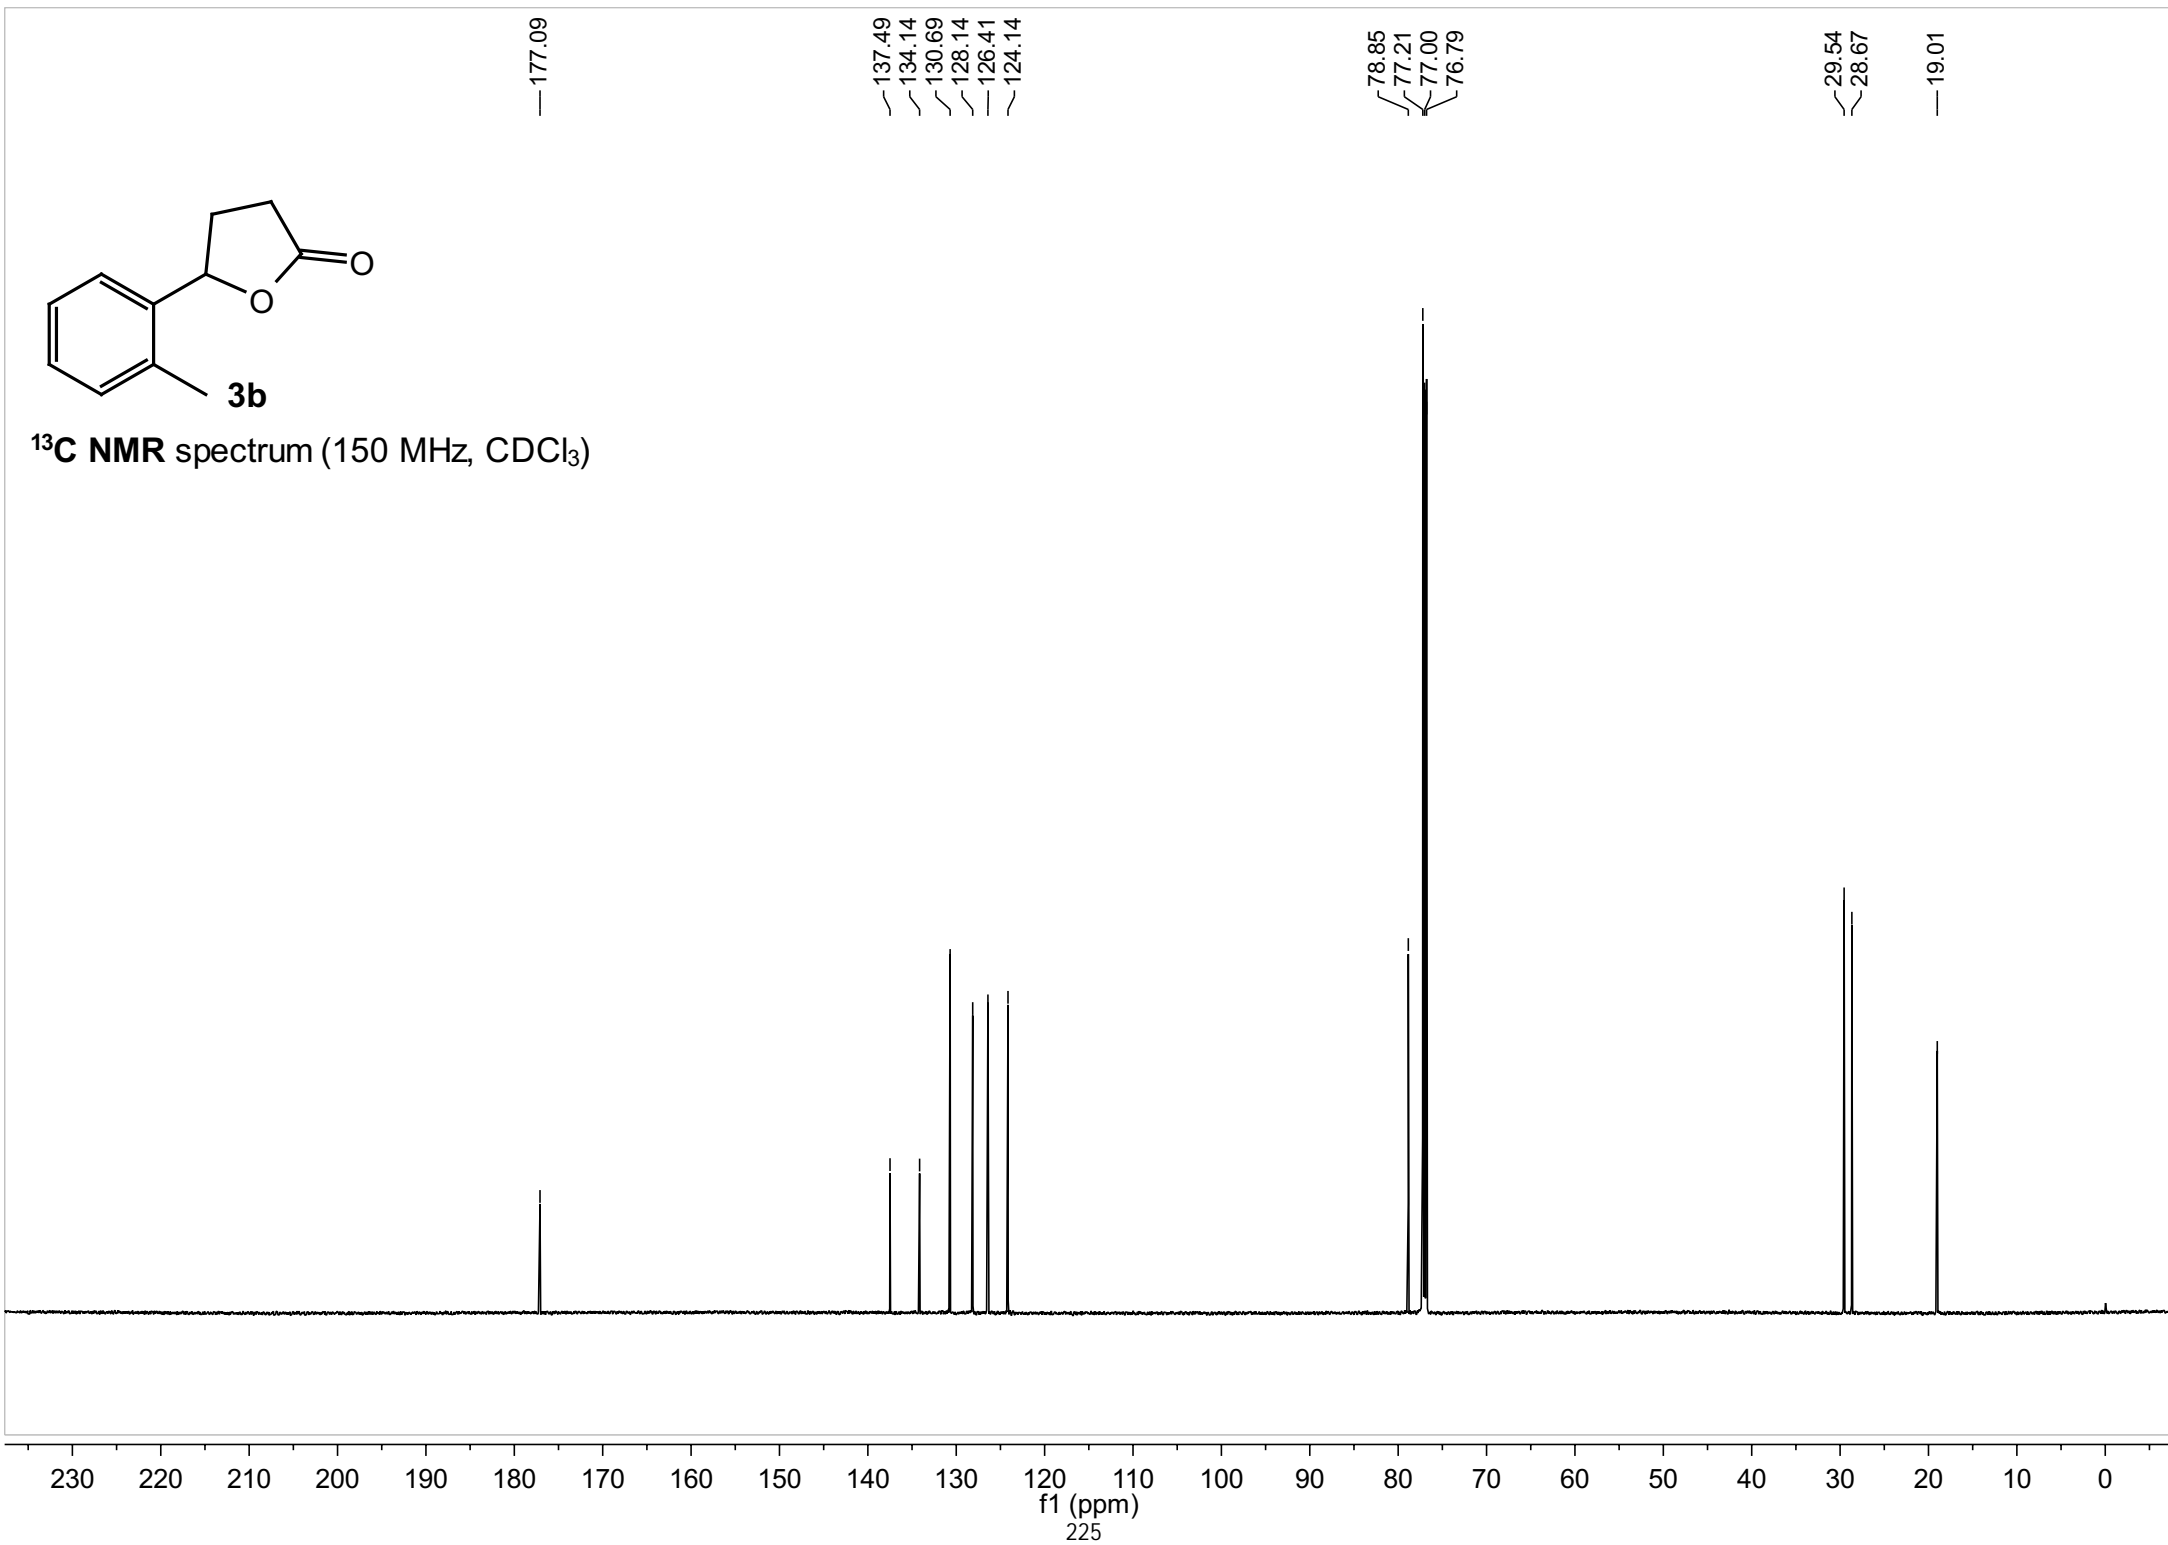

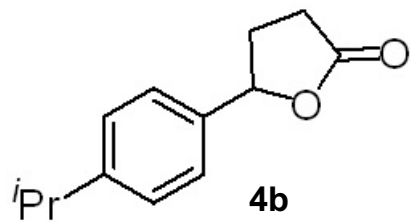

<sup>1</sup>H NMR spectrum (400 MHz, CDCl<sub>3</sub>)

7.267  
7.263  
7.253  
7.250  
7.240  
7.236

5.494  
5.484  
5.481  
5.475  
5.470

2.948  
2.937  
2.925  
2.914  
2.902  
2.891  
2.879  
2.857  
2.654  
2.644  
2.639  
2.635  
2.633  
2.624  
2.619  
2.616

2.239  
2.229  
2.226  
2.218  
2.213  
2.204  
2.199  
2.191  
2.189  
2.181  
2.176  
2.173  
1.253  
1.242

—0.000

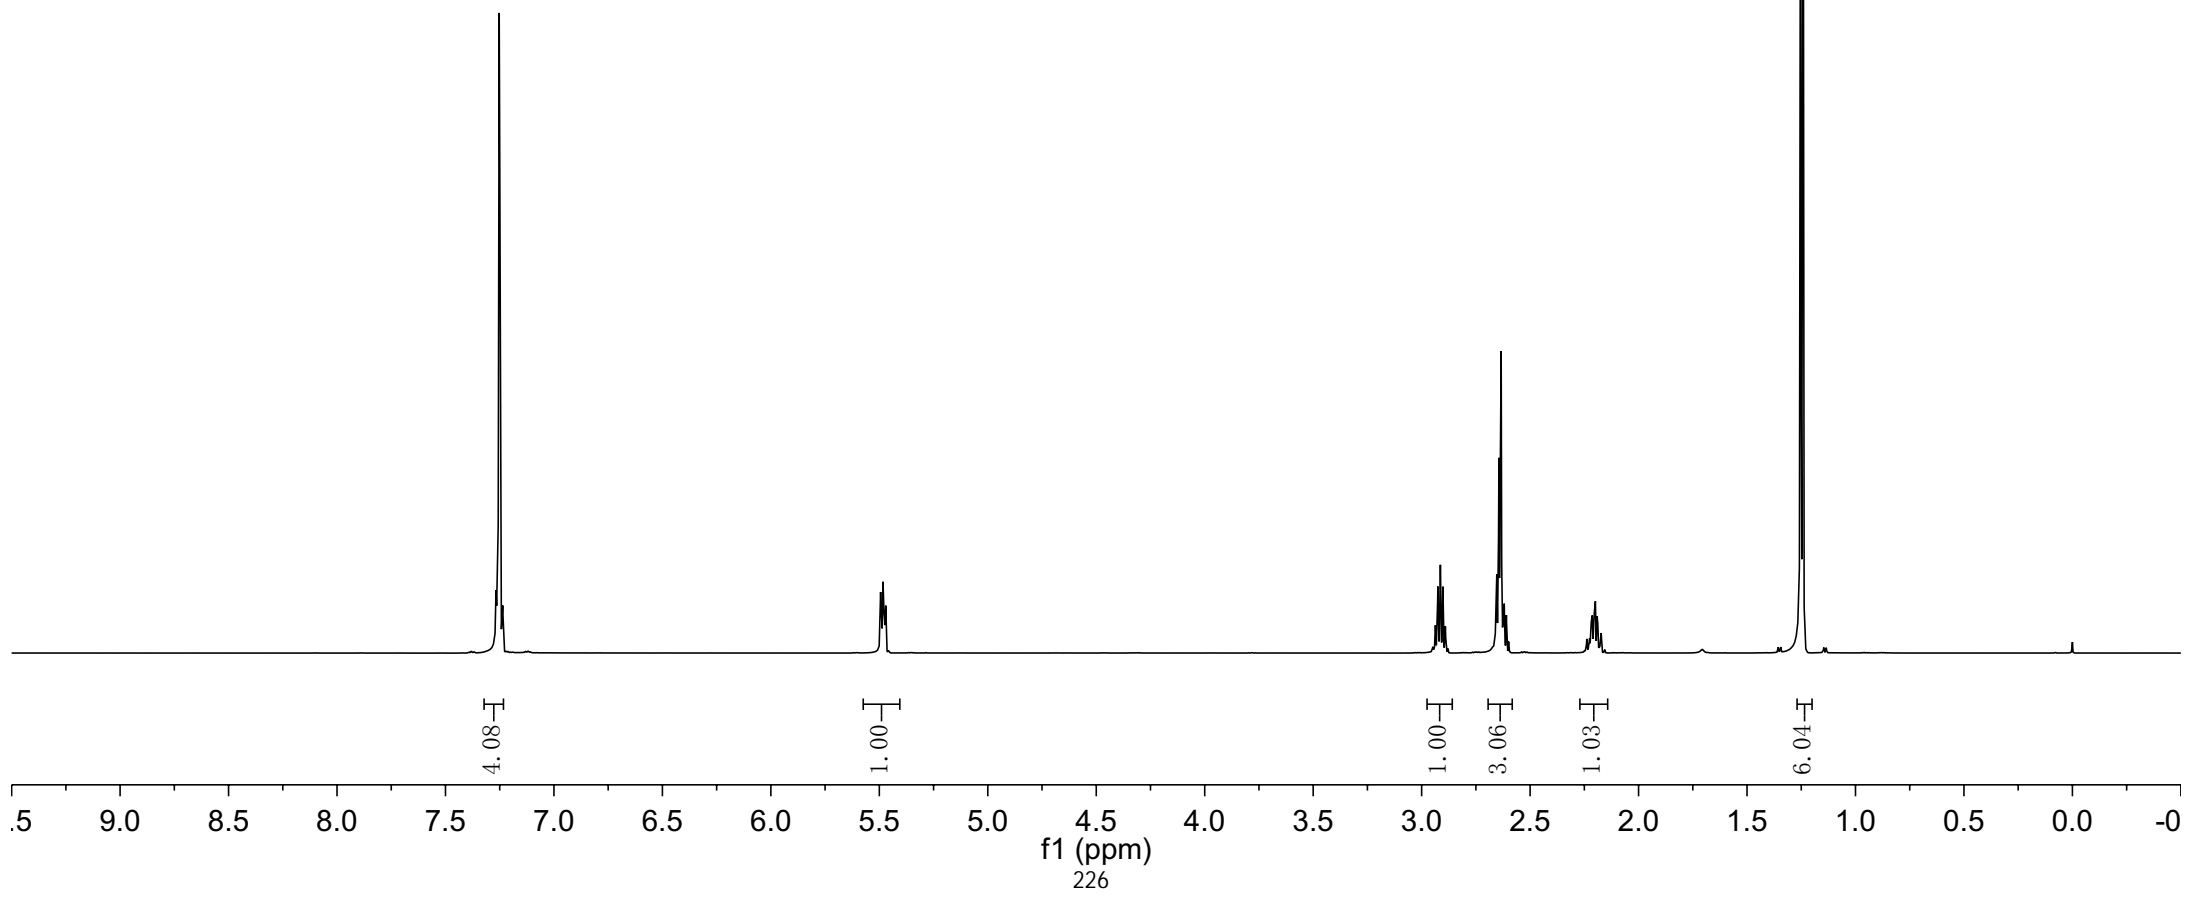

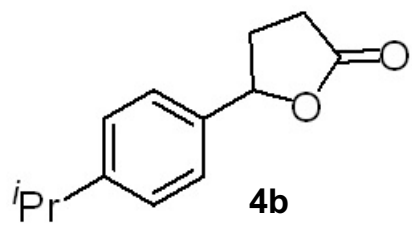

<sup>13</sup>C NMR spectrum (100 MHz, CDCl<sub>3</sub>)

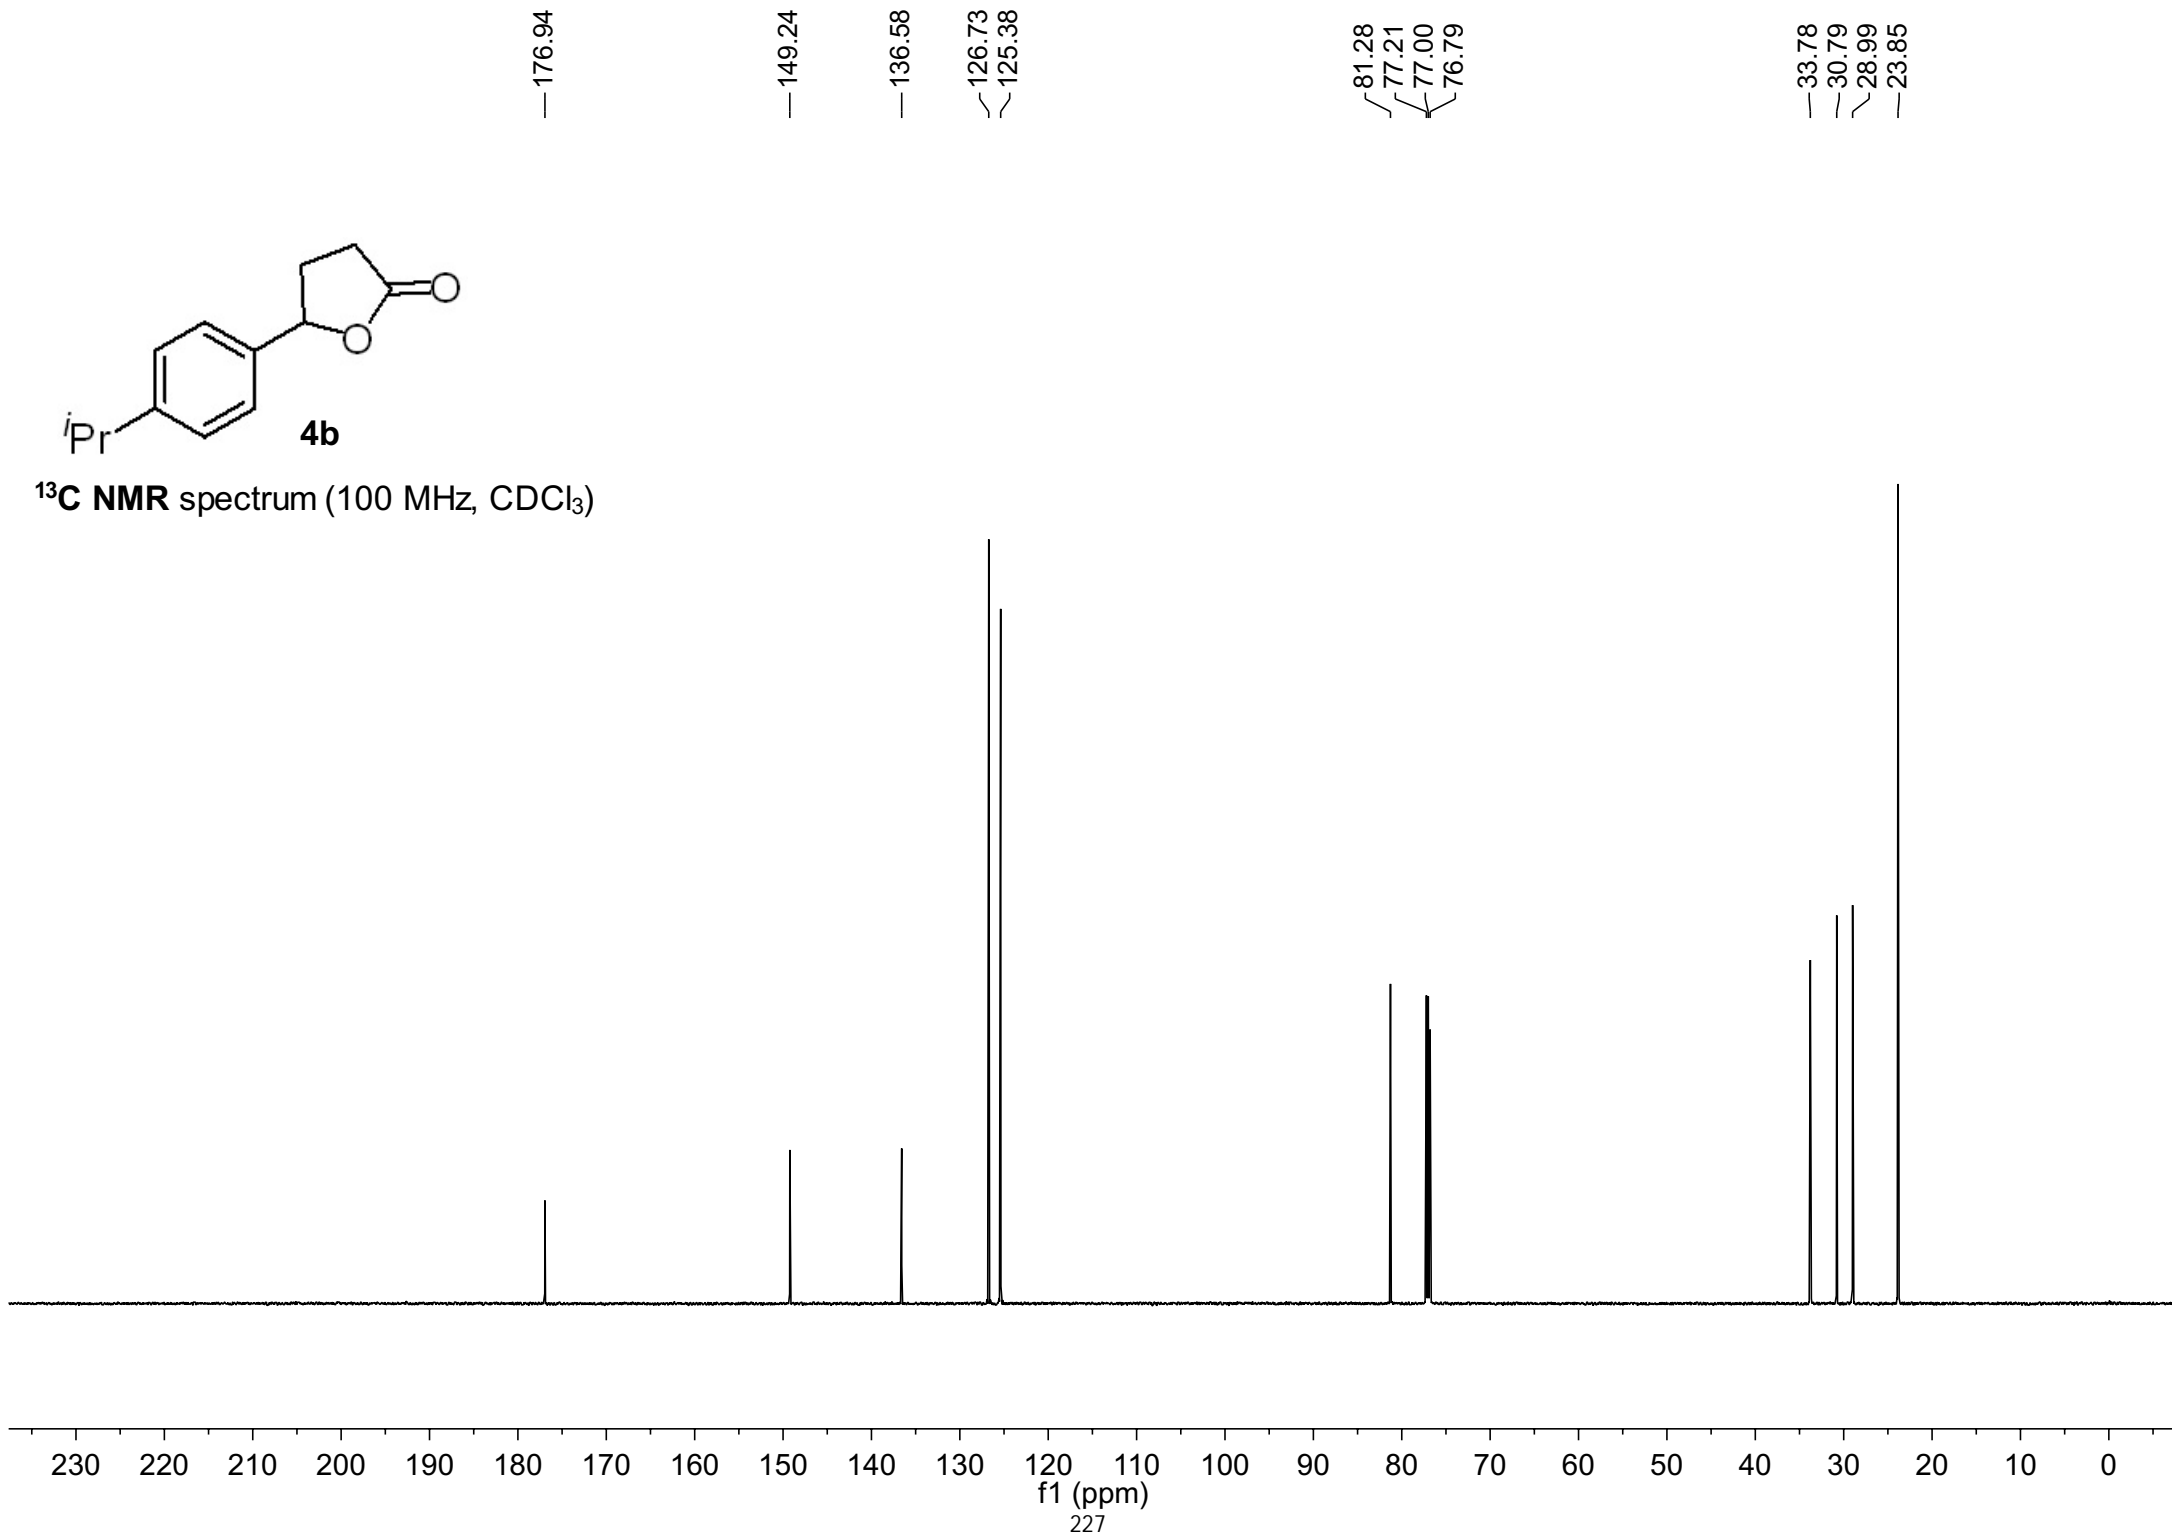



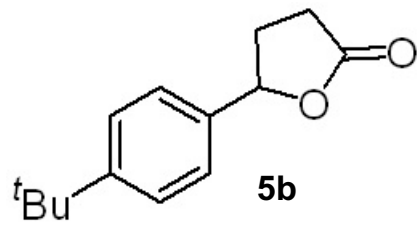

<sup>1</sup>H NMR spectrum (600 MHz, CDCl<sub>3</sub>)

7.419  
7.406  
7.277  
7.263  
7.259

5.508  
5.497  
5.485

2.666  
2.663  
2.657  
2.652  
2.648  
2.643  
2.633  
2.629  
2.619  
2.609  
2.253  
2.245  
2.240  
2.237  
2.233  
2.228  
2.219  
2.213  
2.207  
2.204  
2.195  
2.191  
2.188  
1.322

0.000

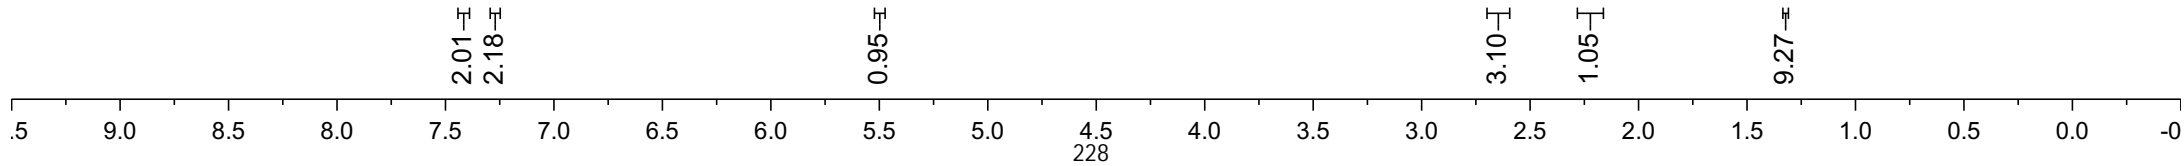

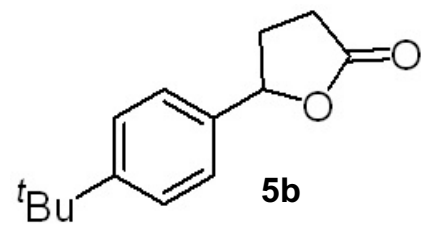

<sup>13</sup>C NMR spectrum (150 MHz, CDCl<sub>3</sub>)

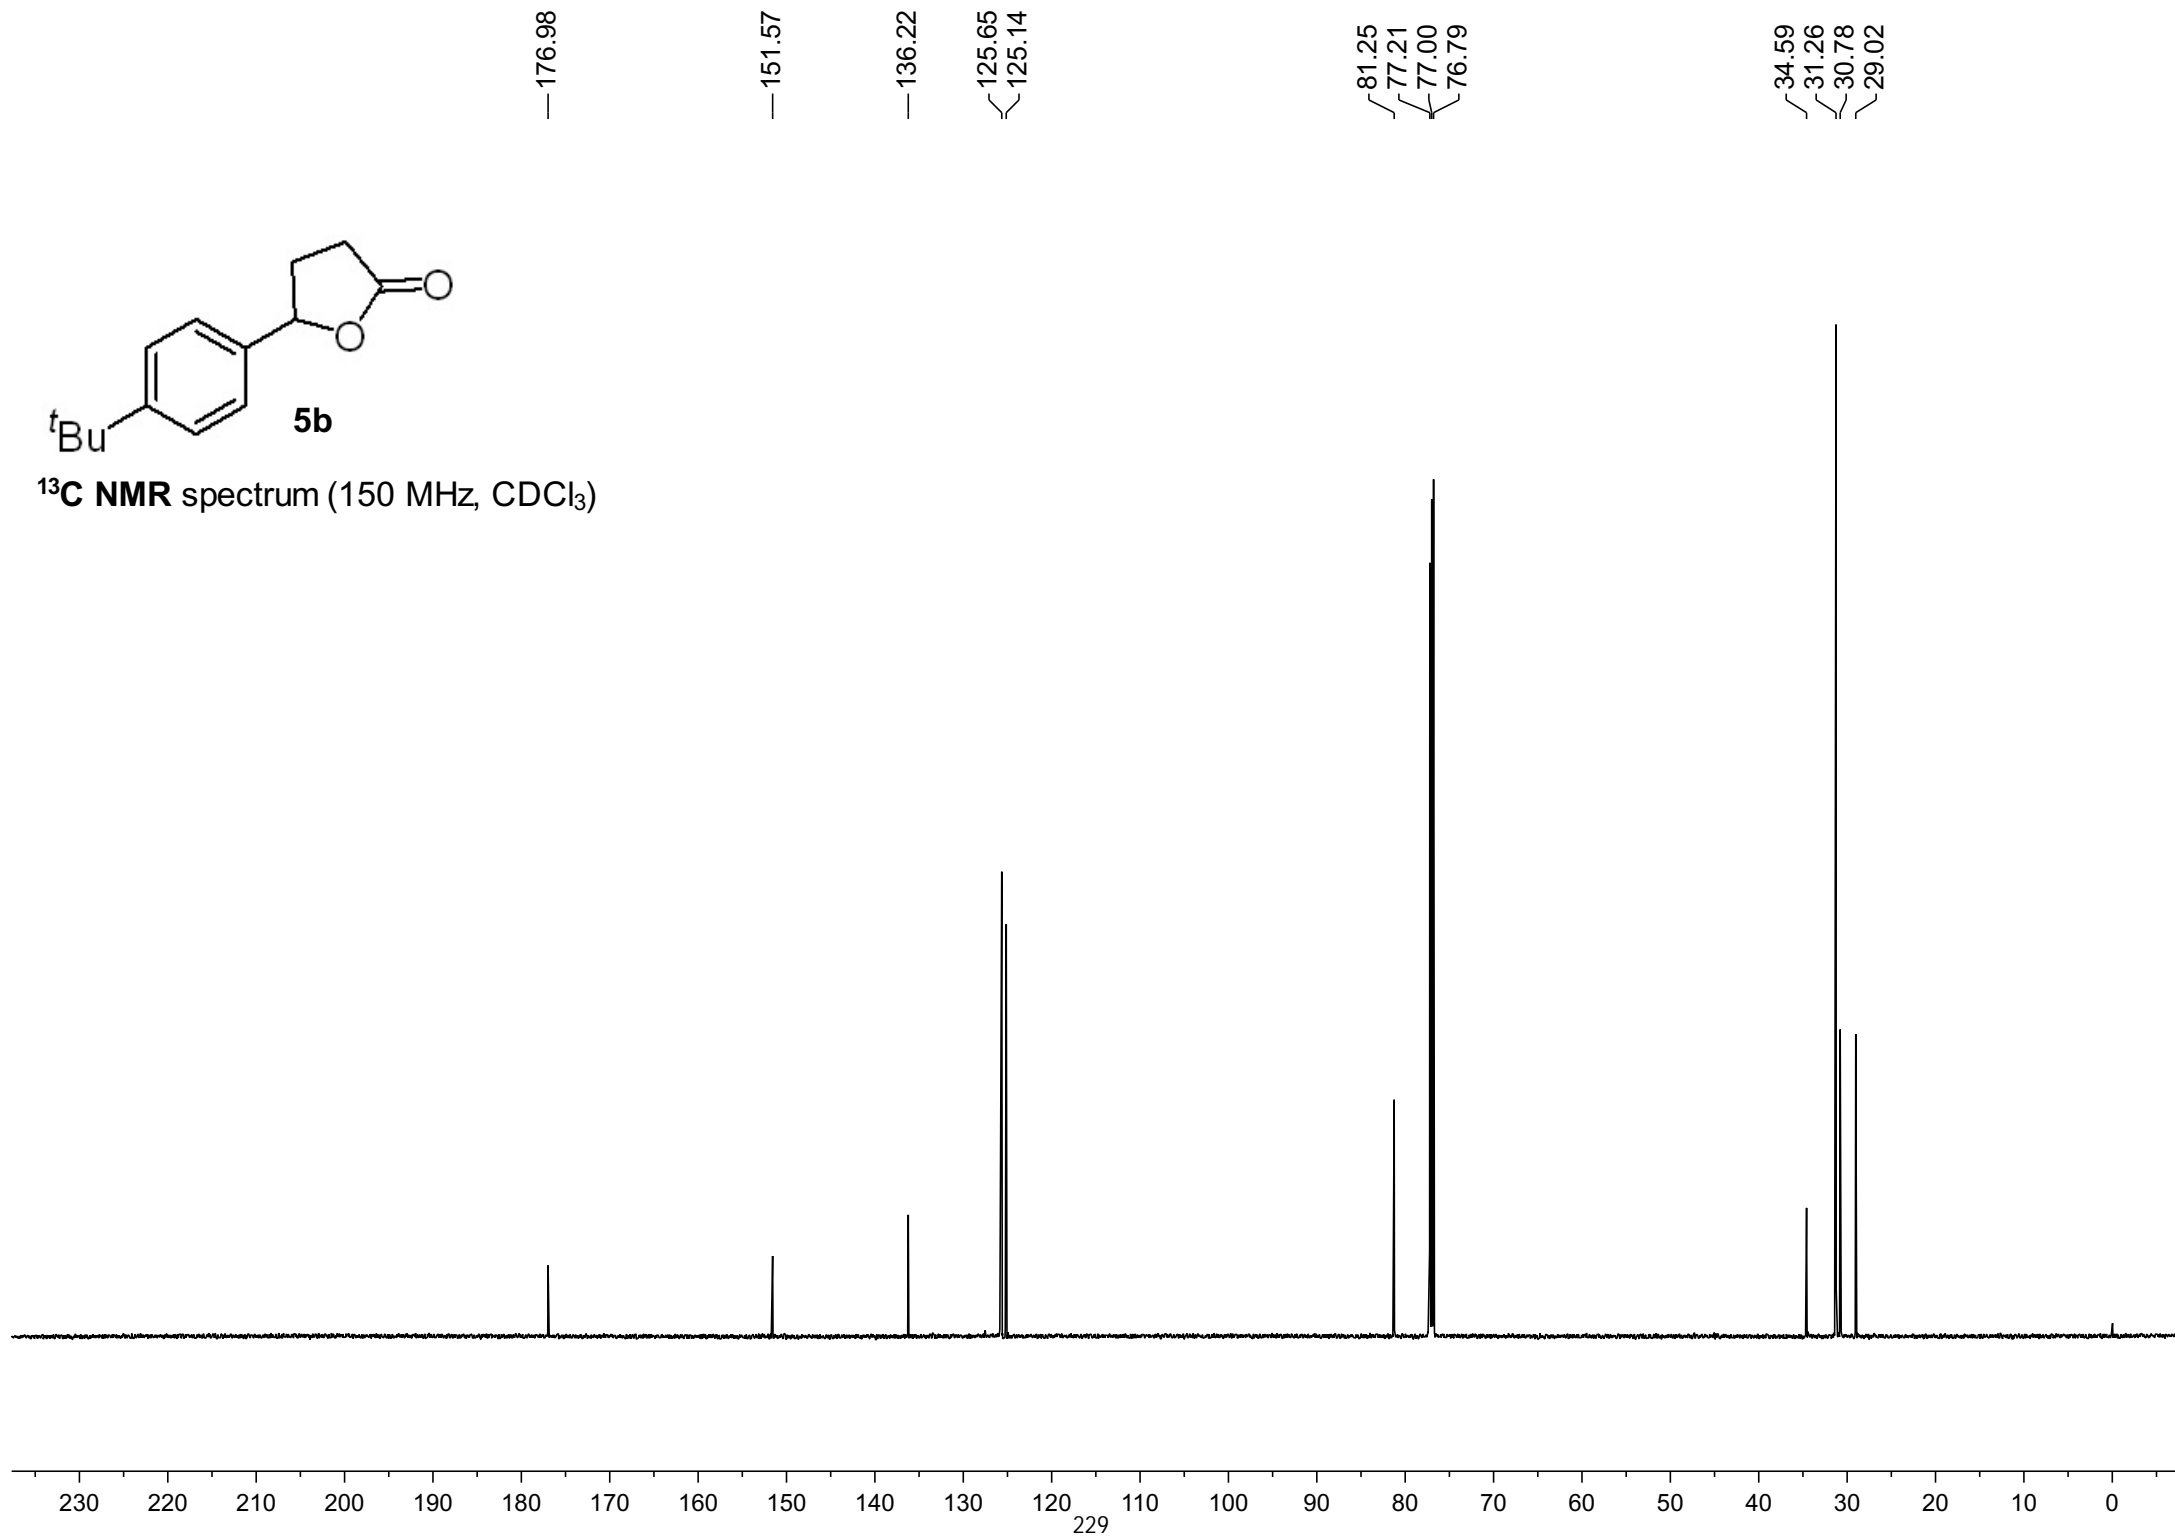

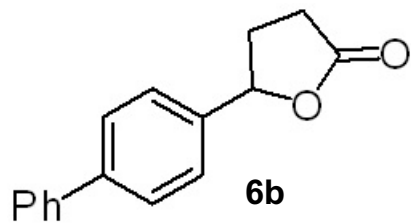

<sup>1</sup>H NMR spectrum (400 MHz, CDCl<sub>3</sub>)

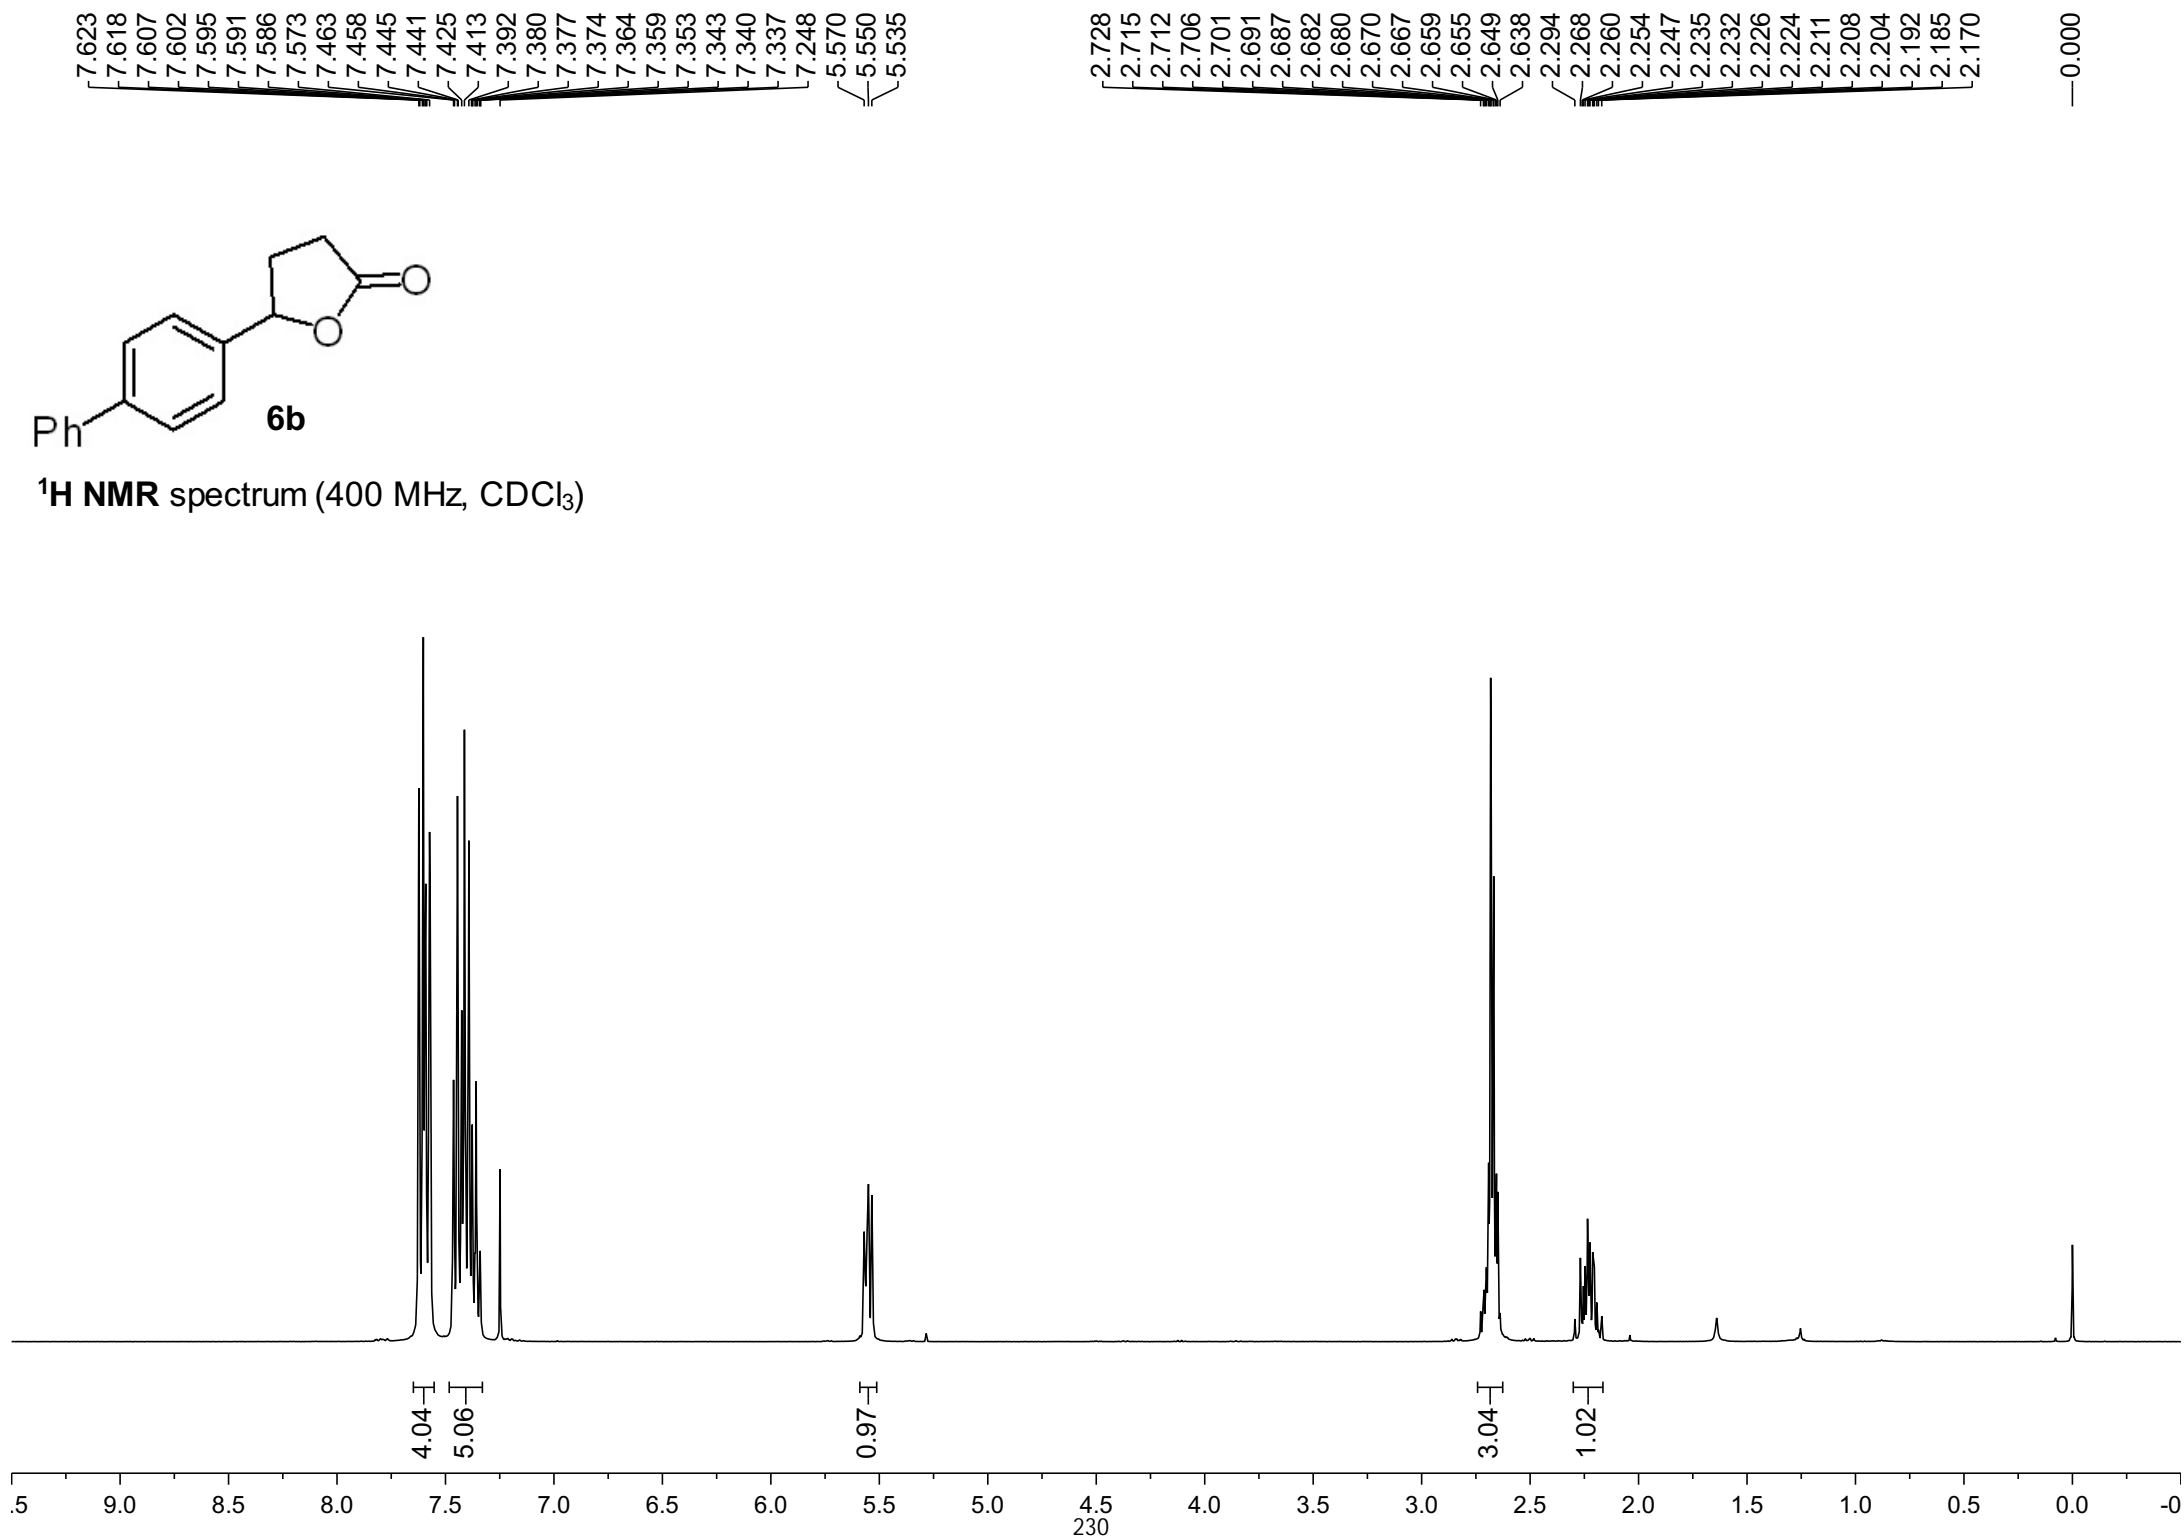



<sup>13</sup>C NMR spectrum (100 MHz, CDCl<sub>3</sub>)

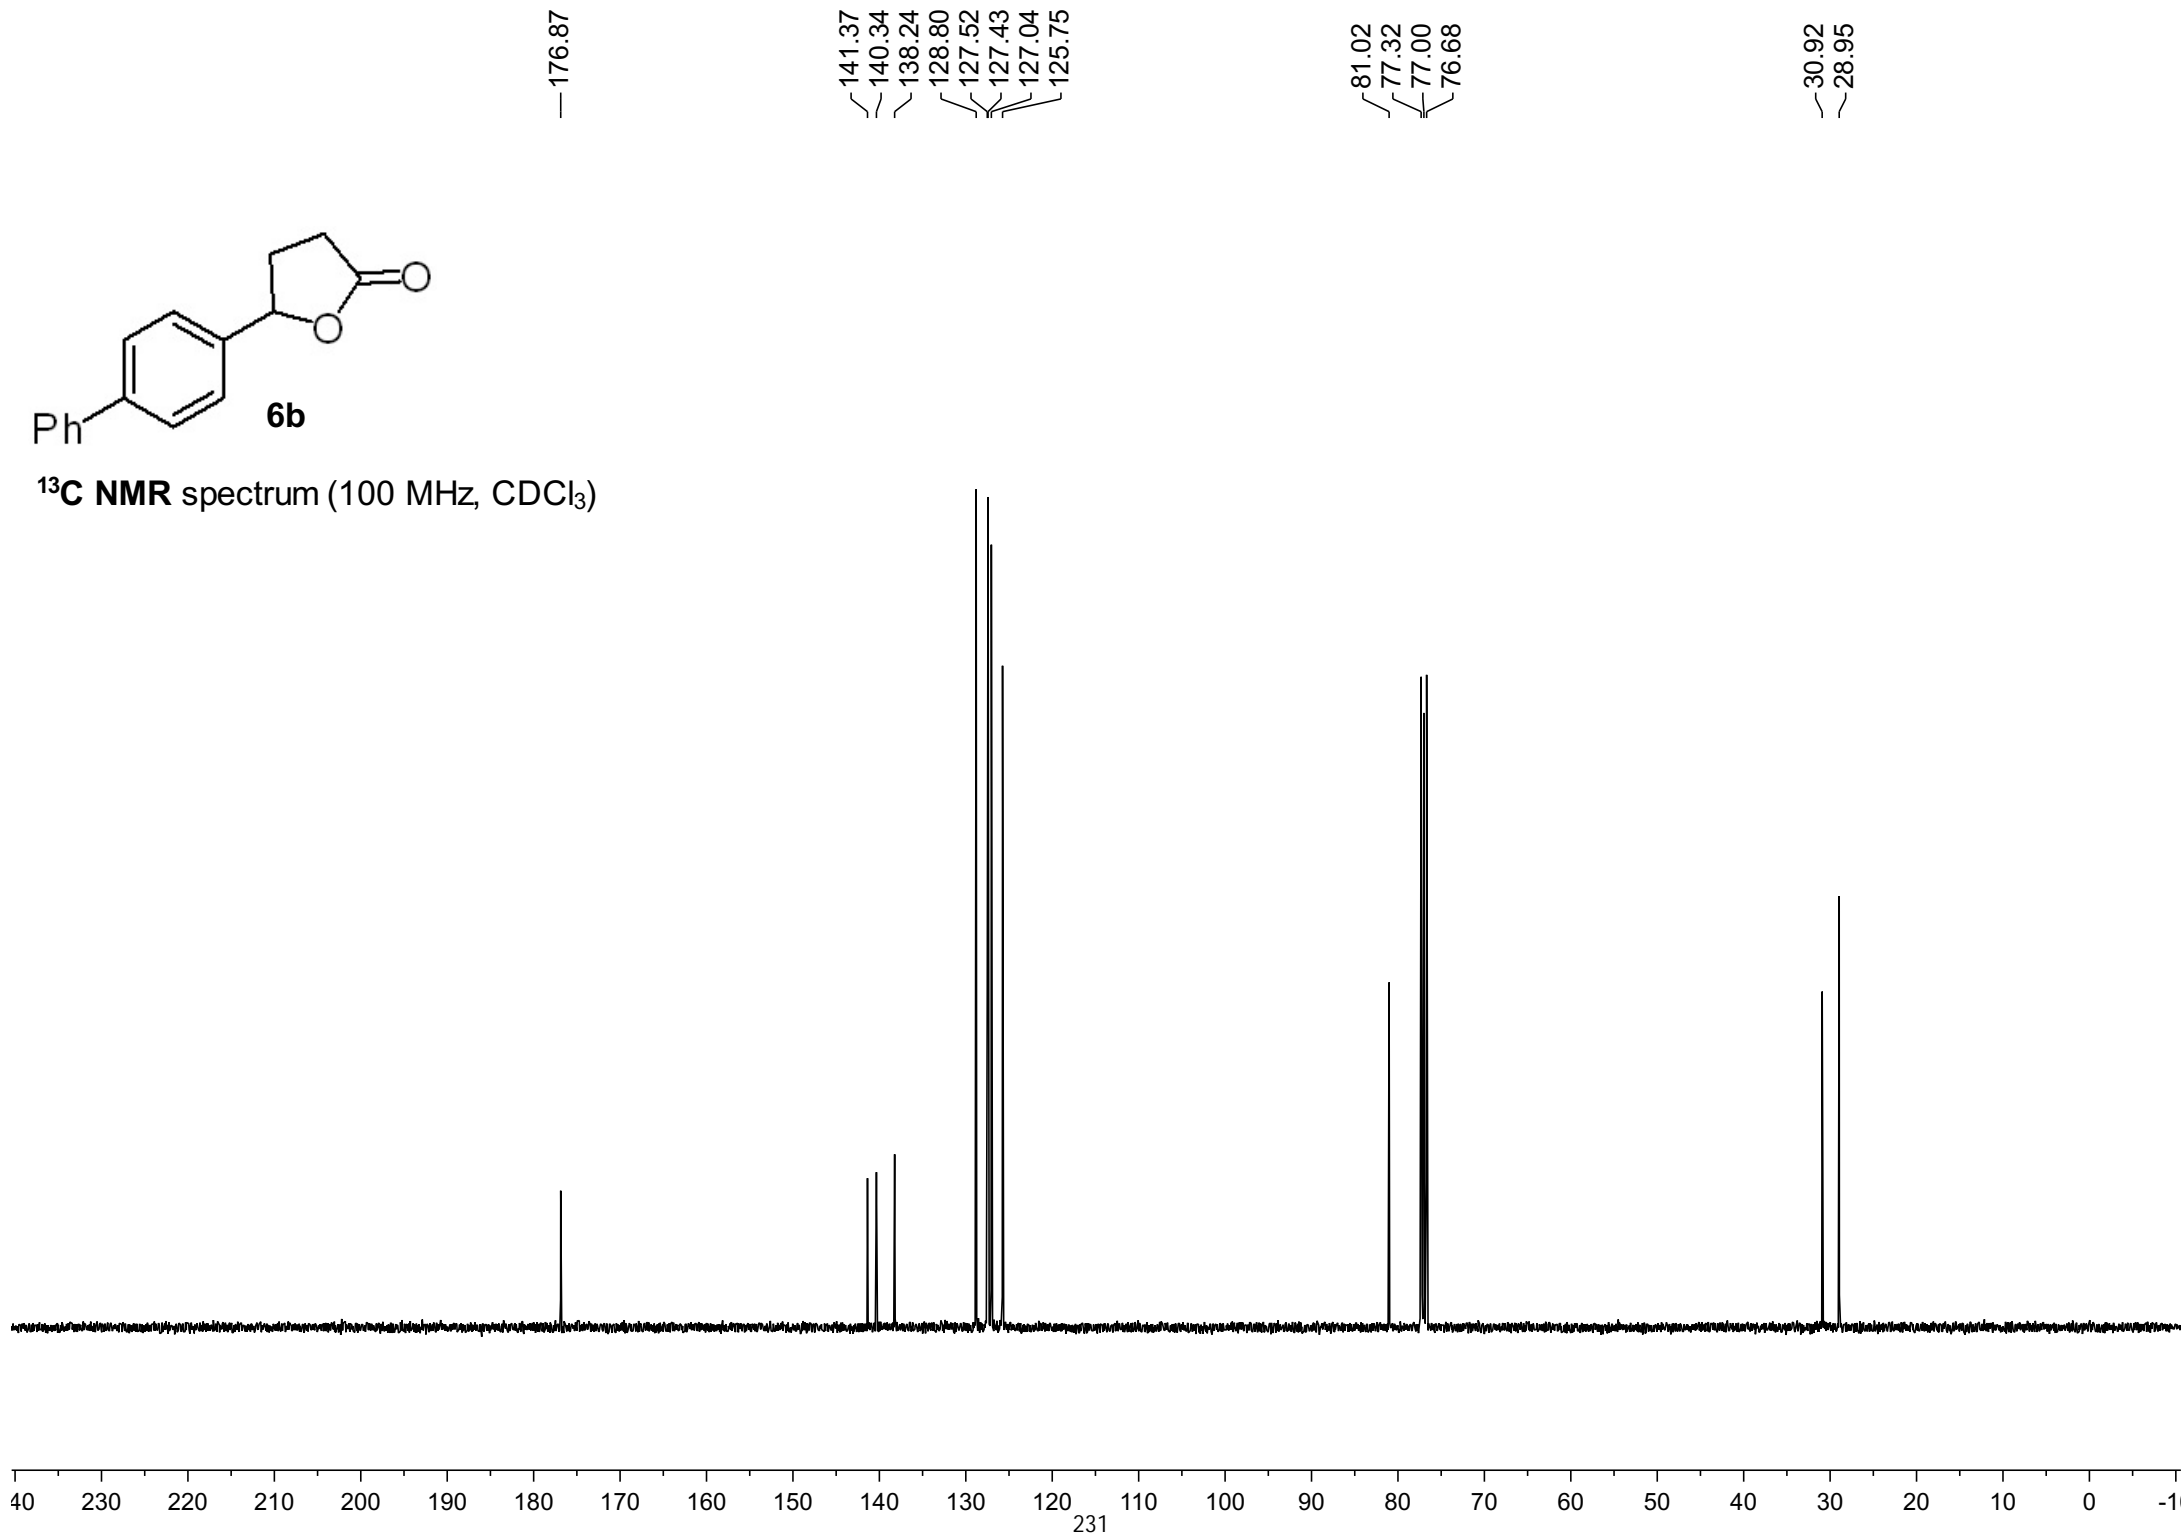

7.277  
7.266  
7.256  
6.926  
6.921  
6.909  
6.904

5.478  
5.462  
5.457  
5.442

3.815  
2.678  
2.675  
2.661  
2.650  
2.640  
2.631  
2.616  
2.600  
2.584  
2.263  
2.251  
2.247  
2.241  
2.225  
2.220  
2.216  
2.201  
2.195  
2.191  
2.179  
2.173  
2.149  
0.000

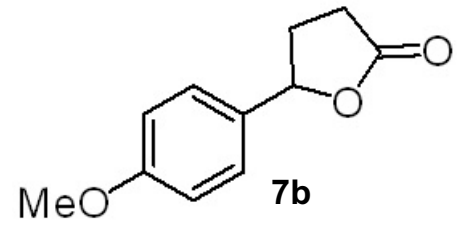

<sup>1</sup>H NMR spectrum (400 MHz, CDCl<sub>3</sub>)

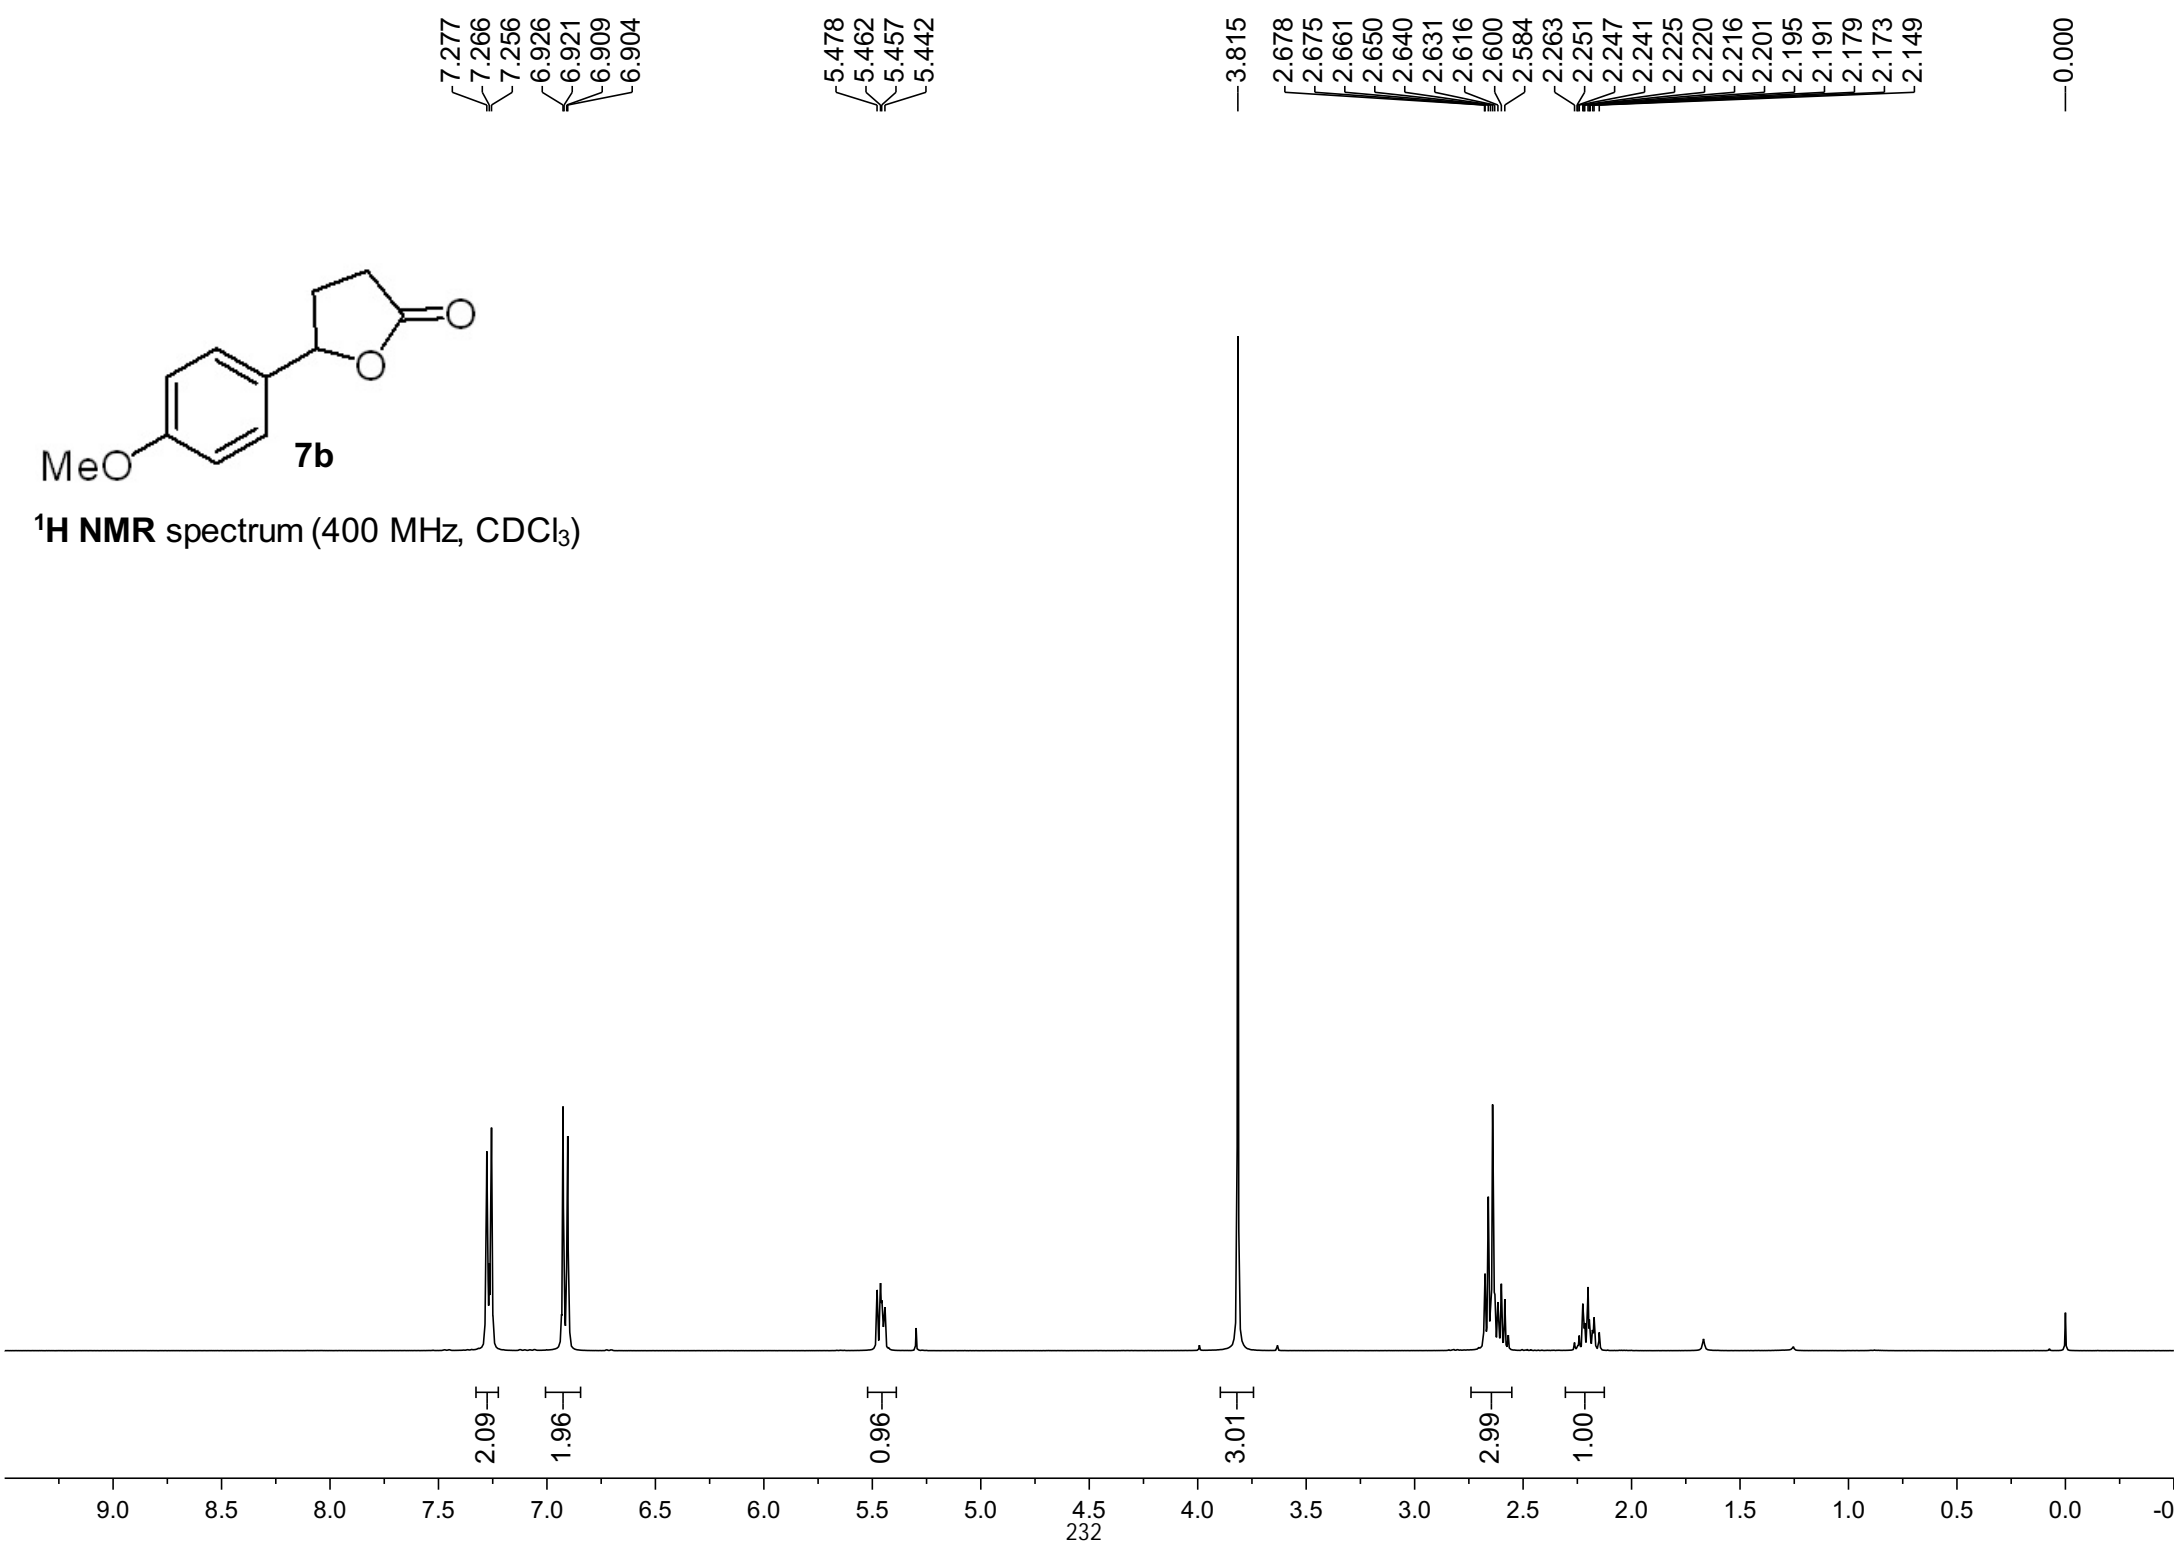

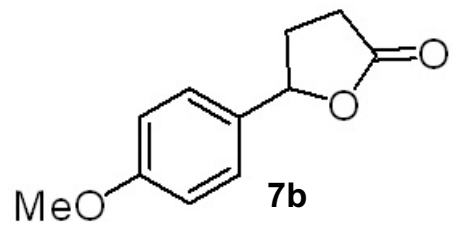

<sup>13</sup>C NMR spectrum (100 MHz, CDCl<sub>3</sub>)

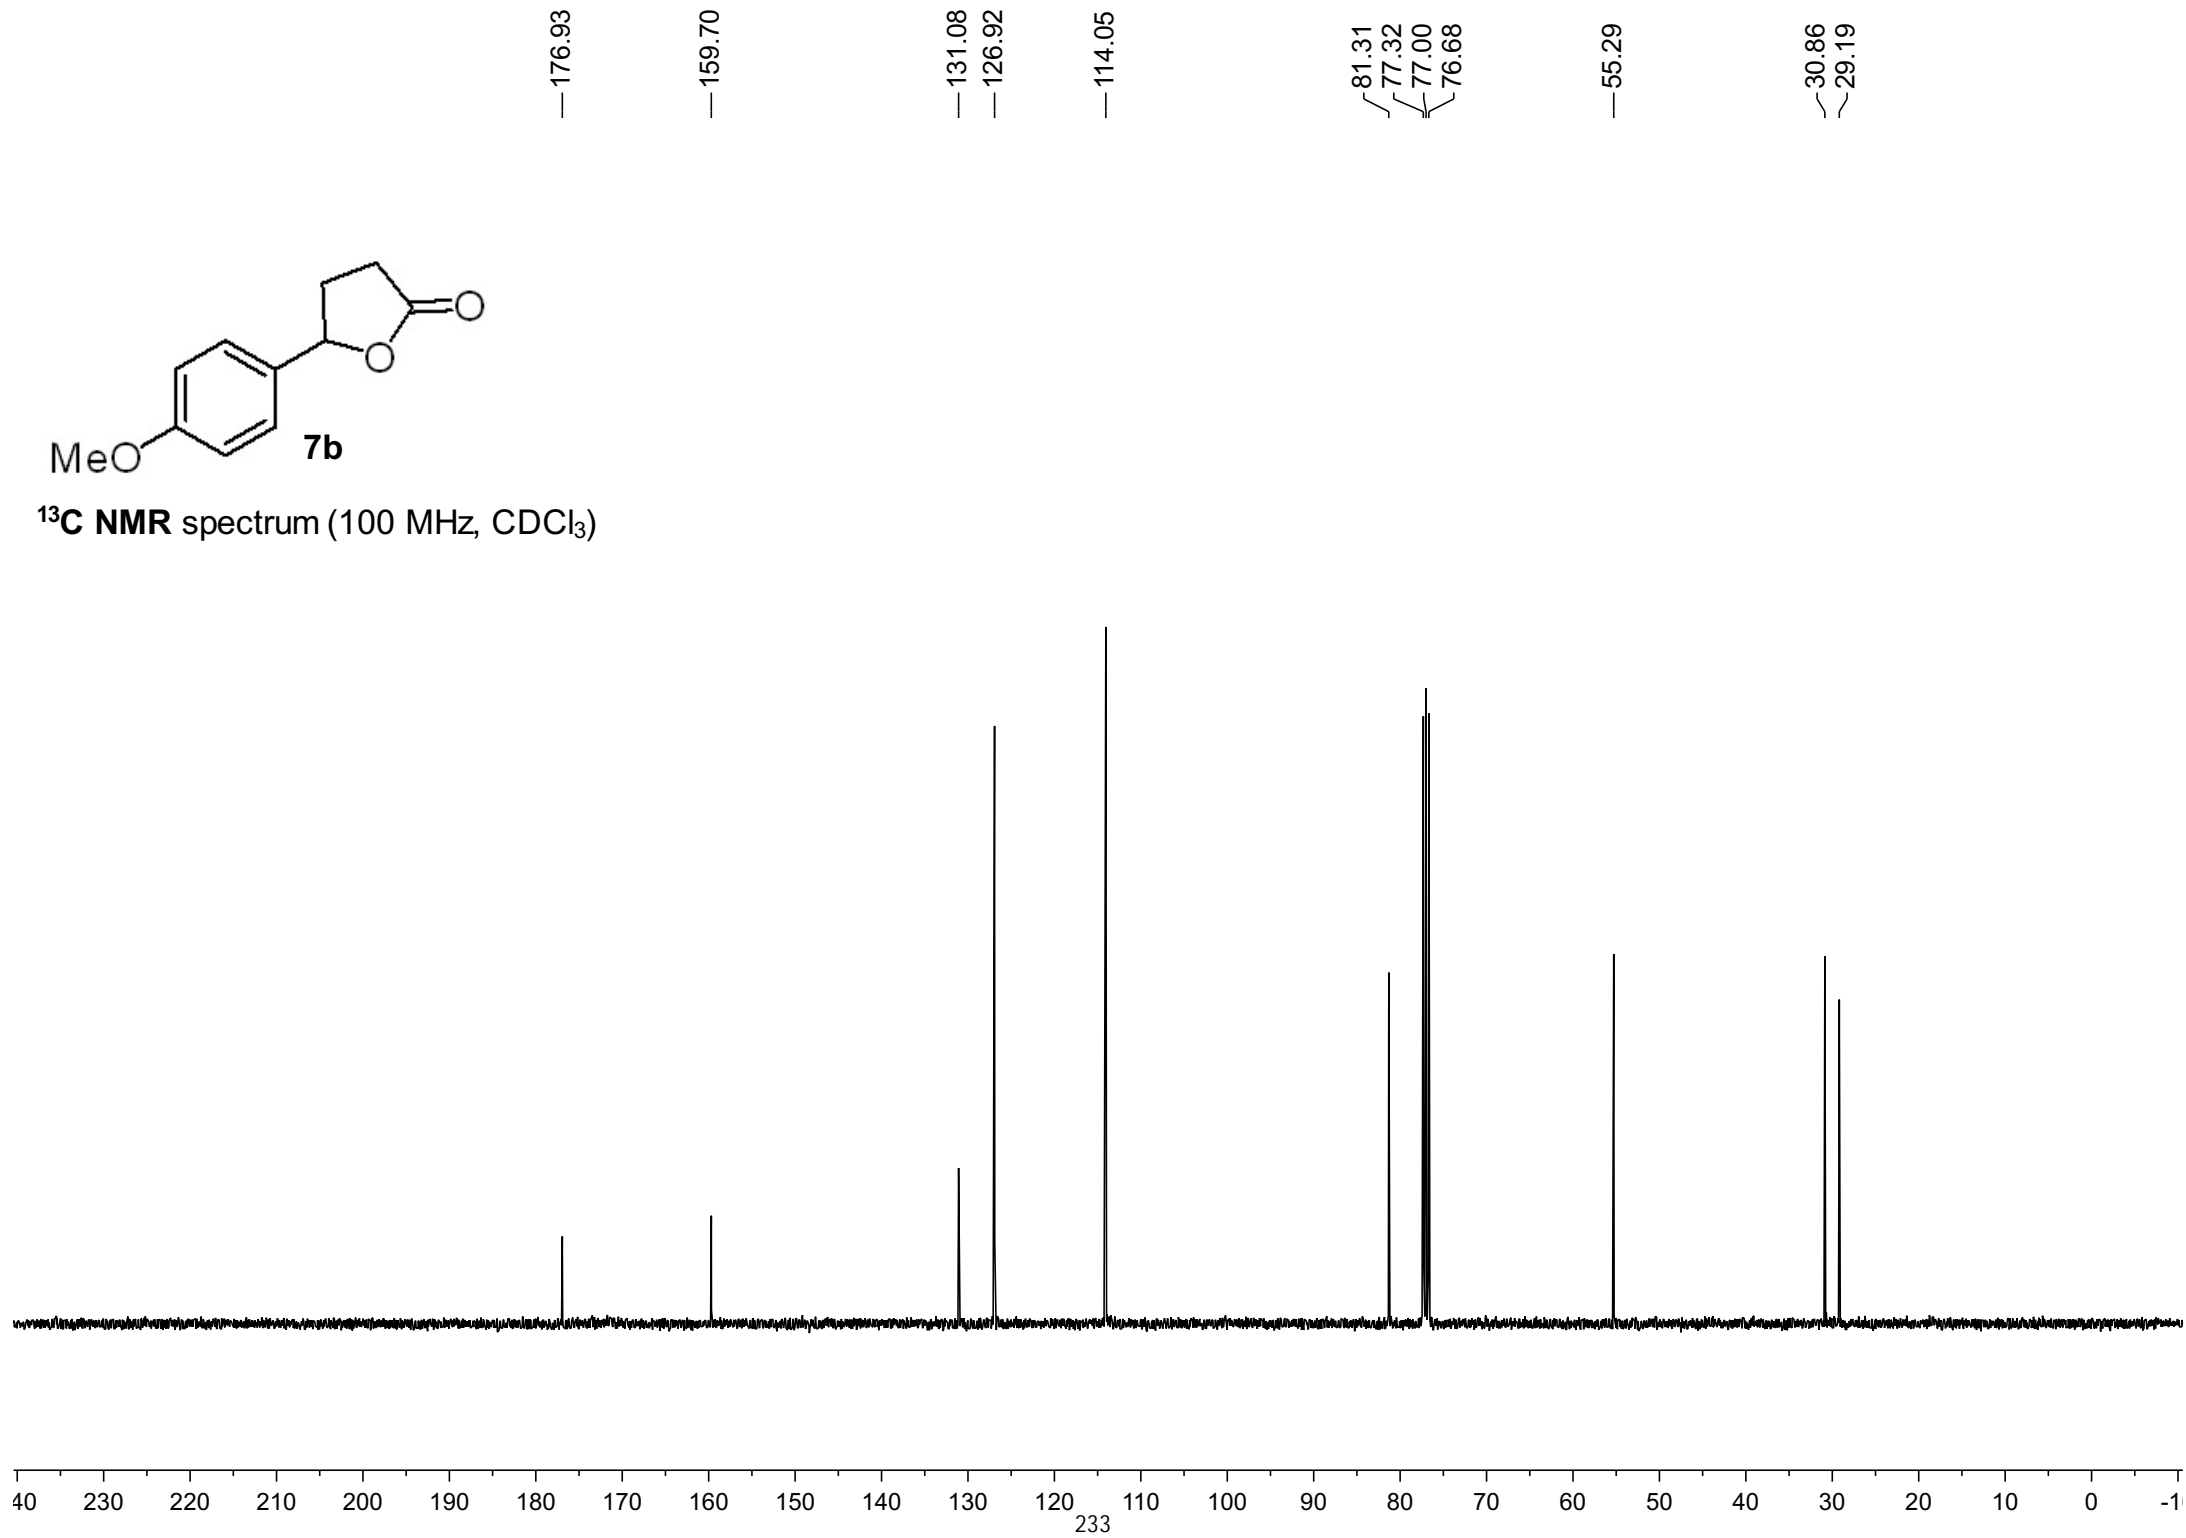

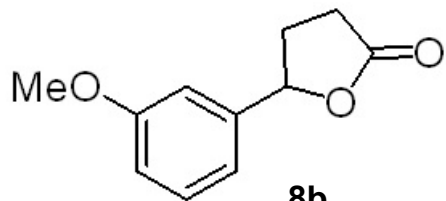

**8b**

<sup>1</sup>H NMR spectrum (400 MHz, CDCl<sub>3</sub>)

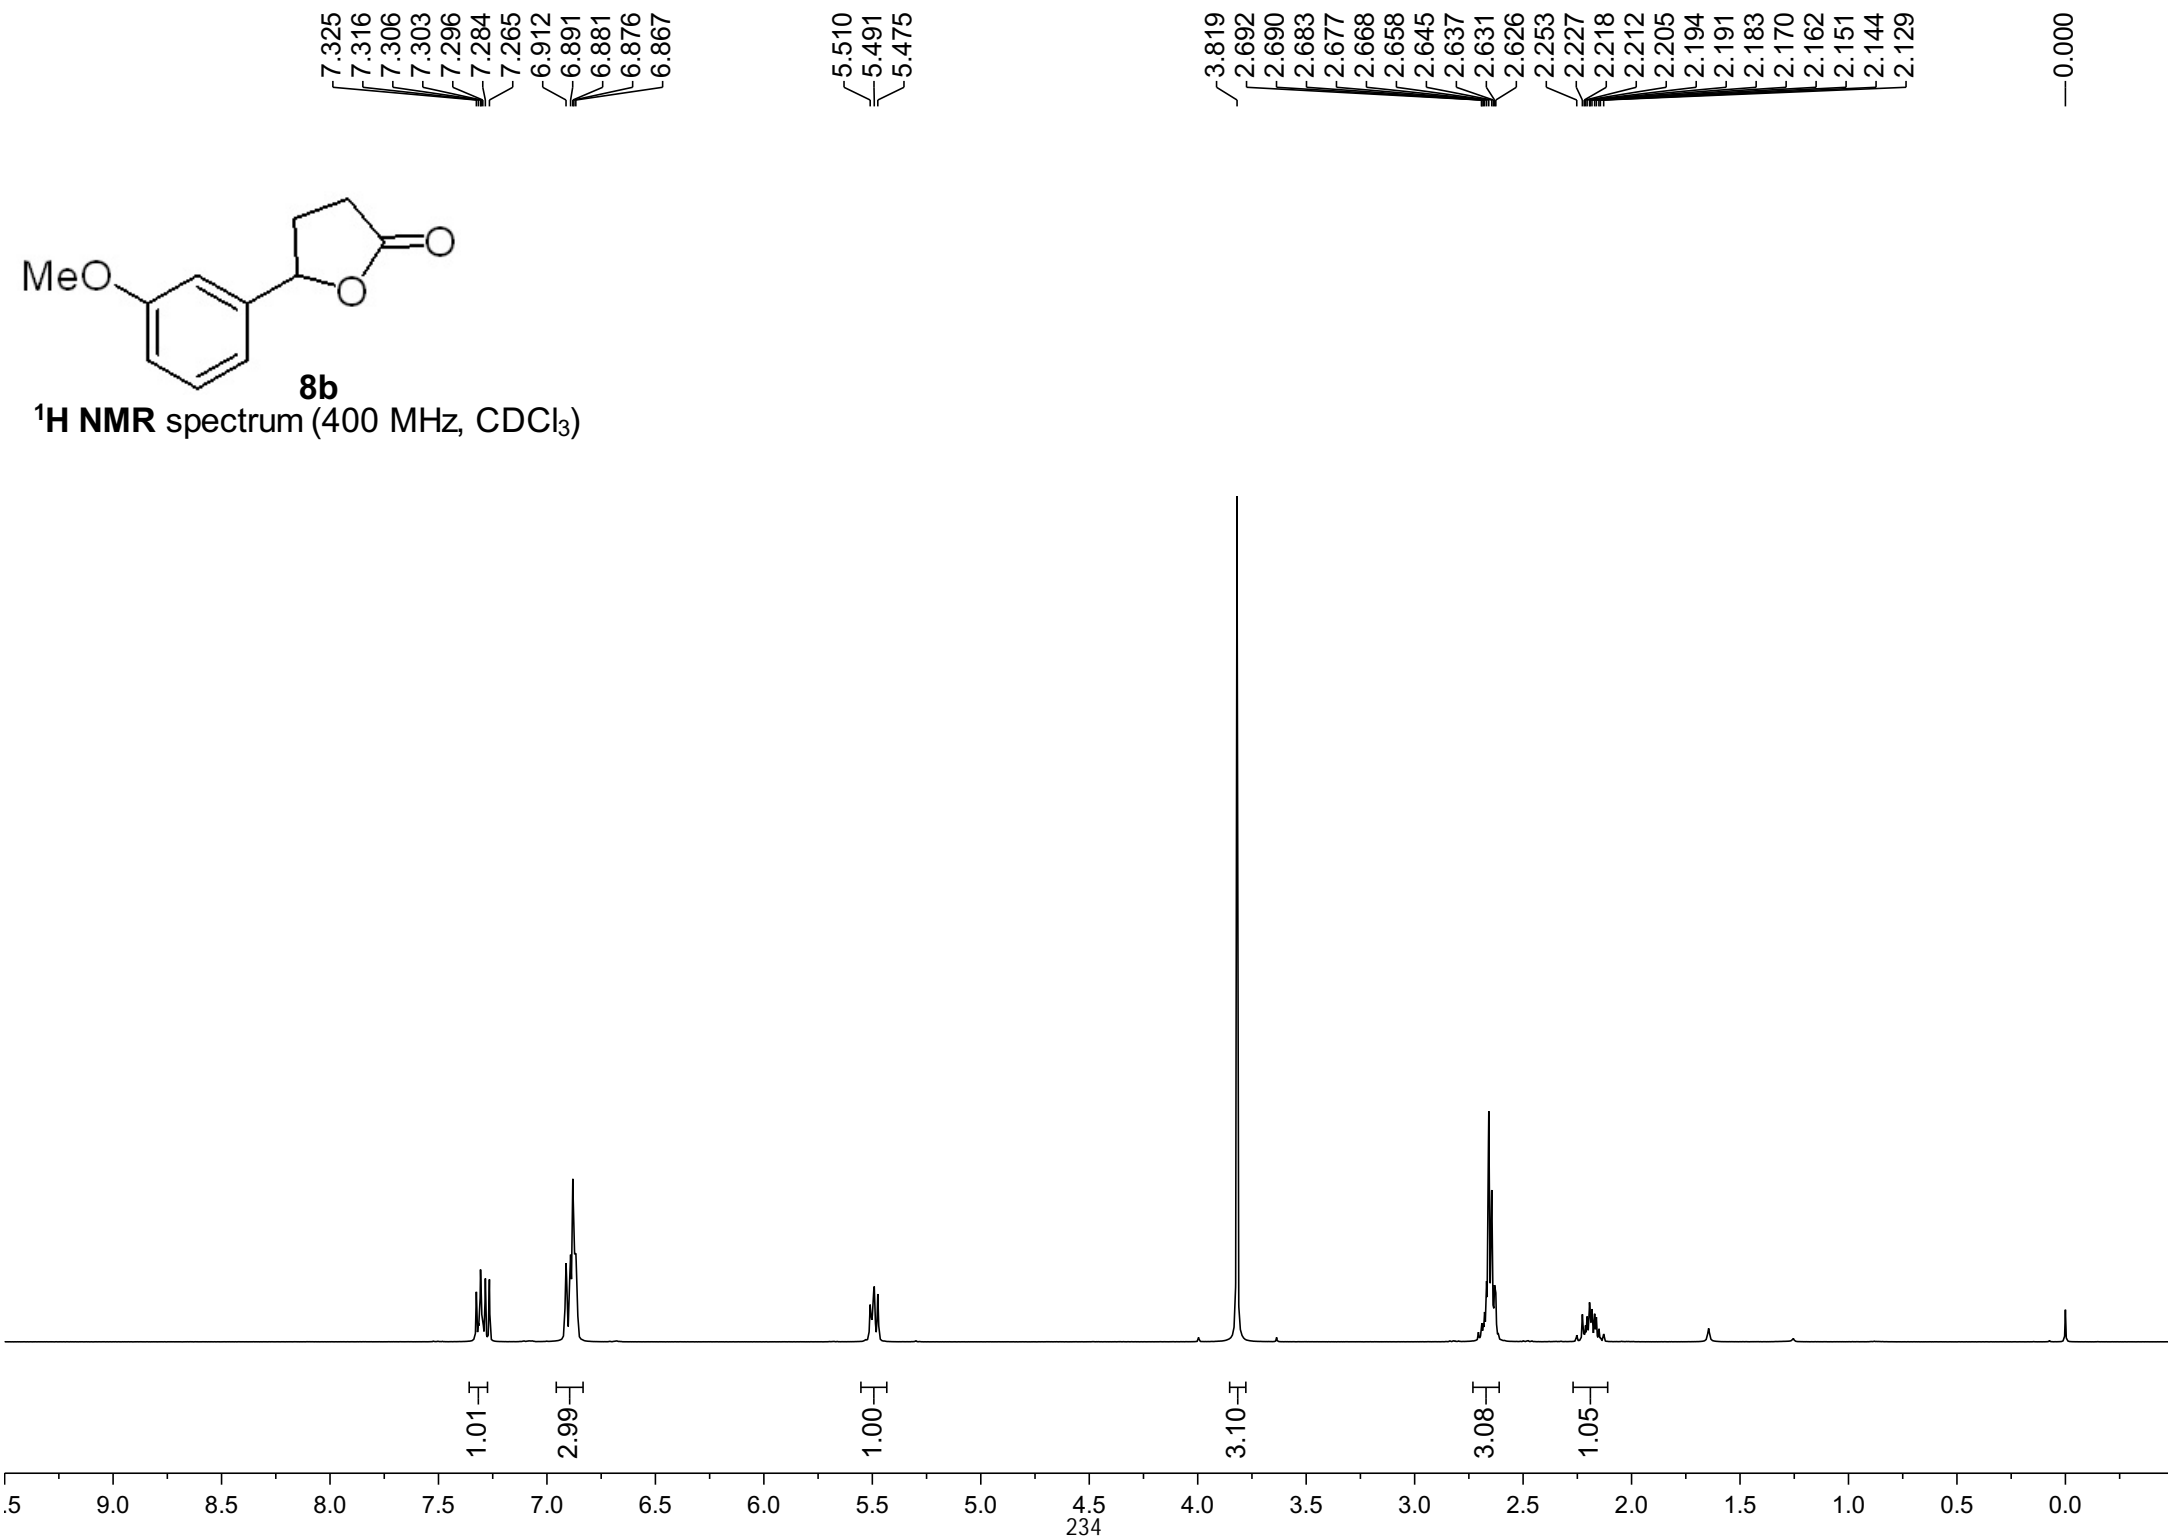

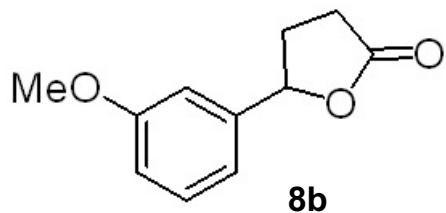

<sup>13</sup>C NMR spectrum (100 MHz, CDCl<sub>3</sub>)

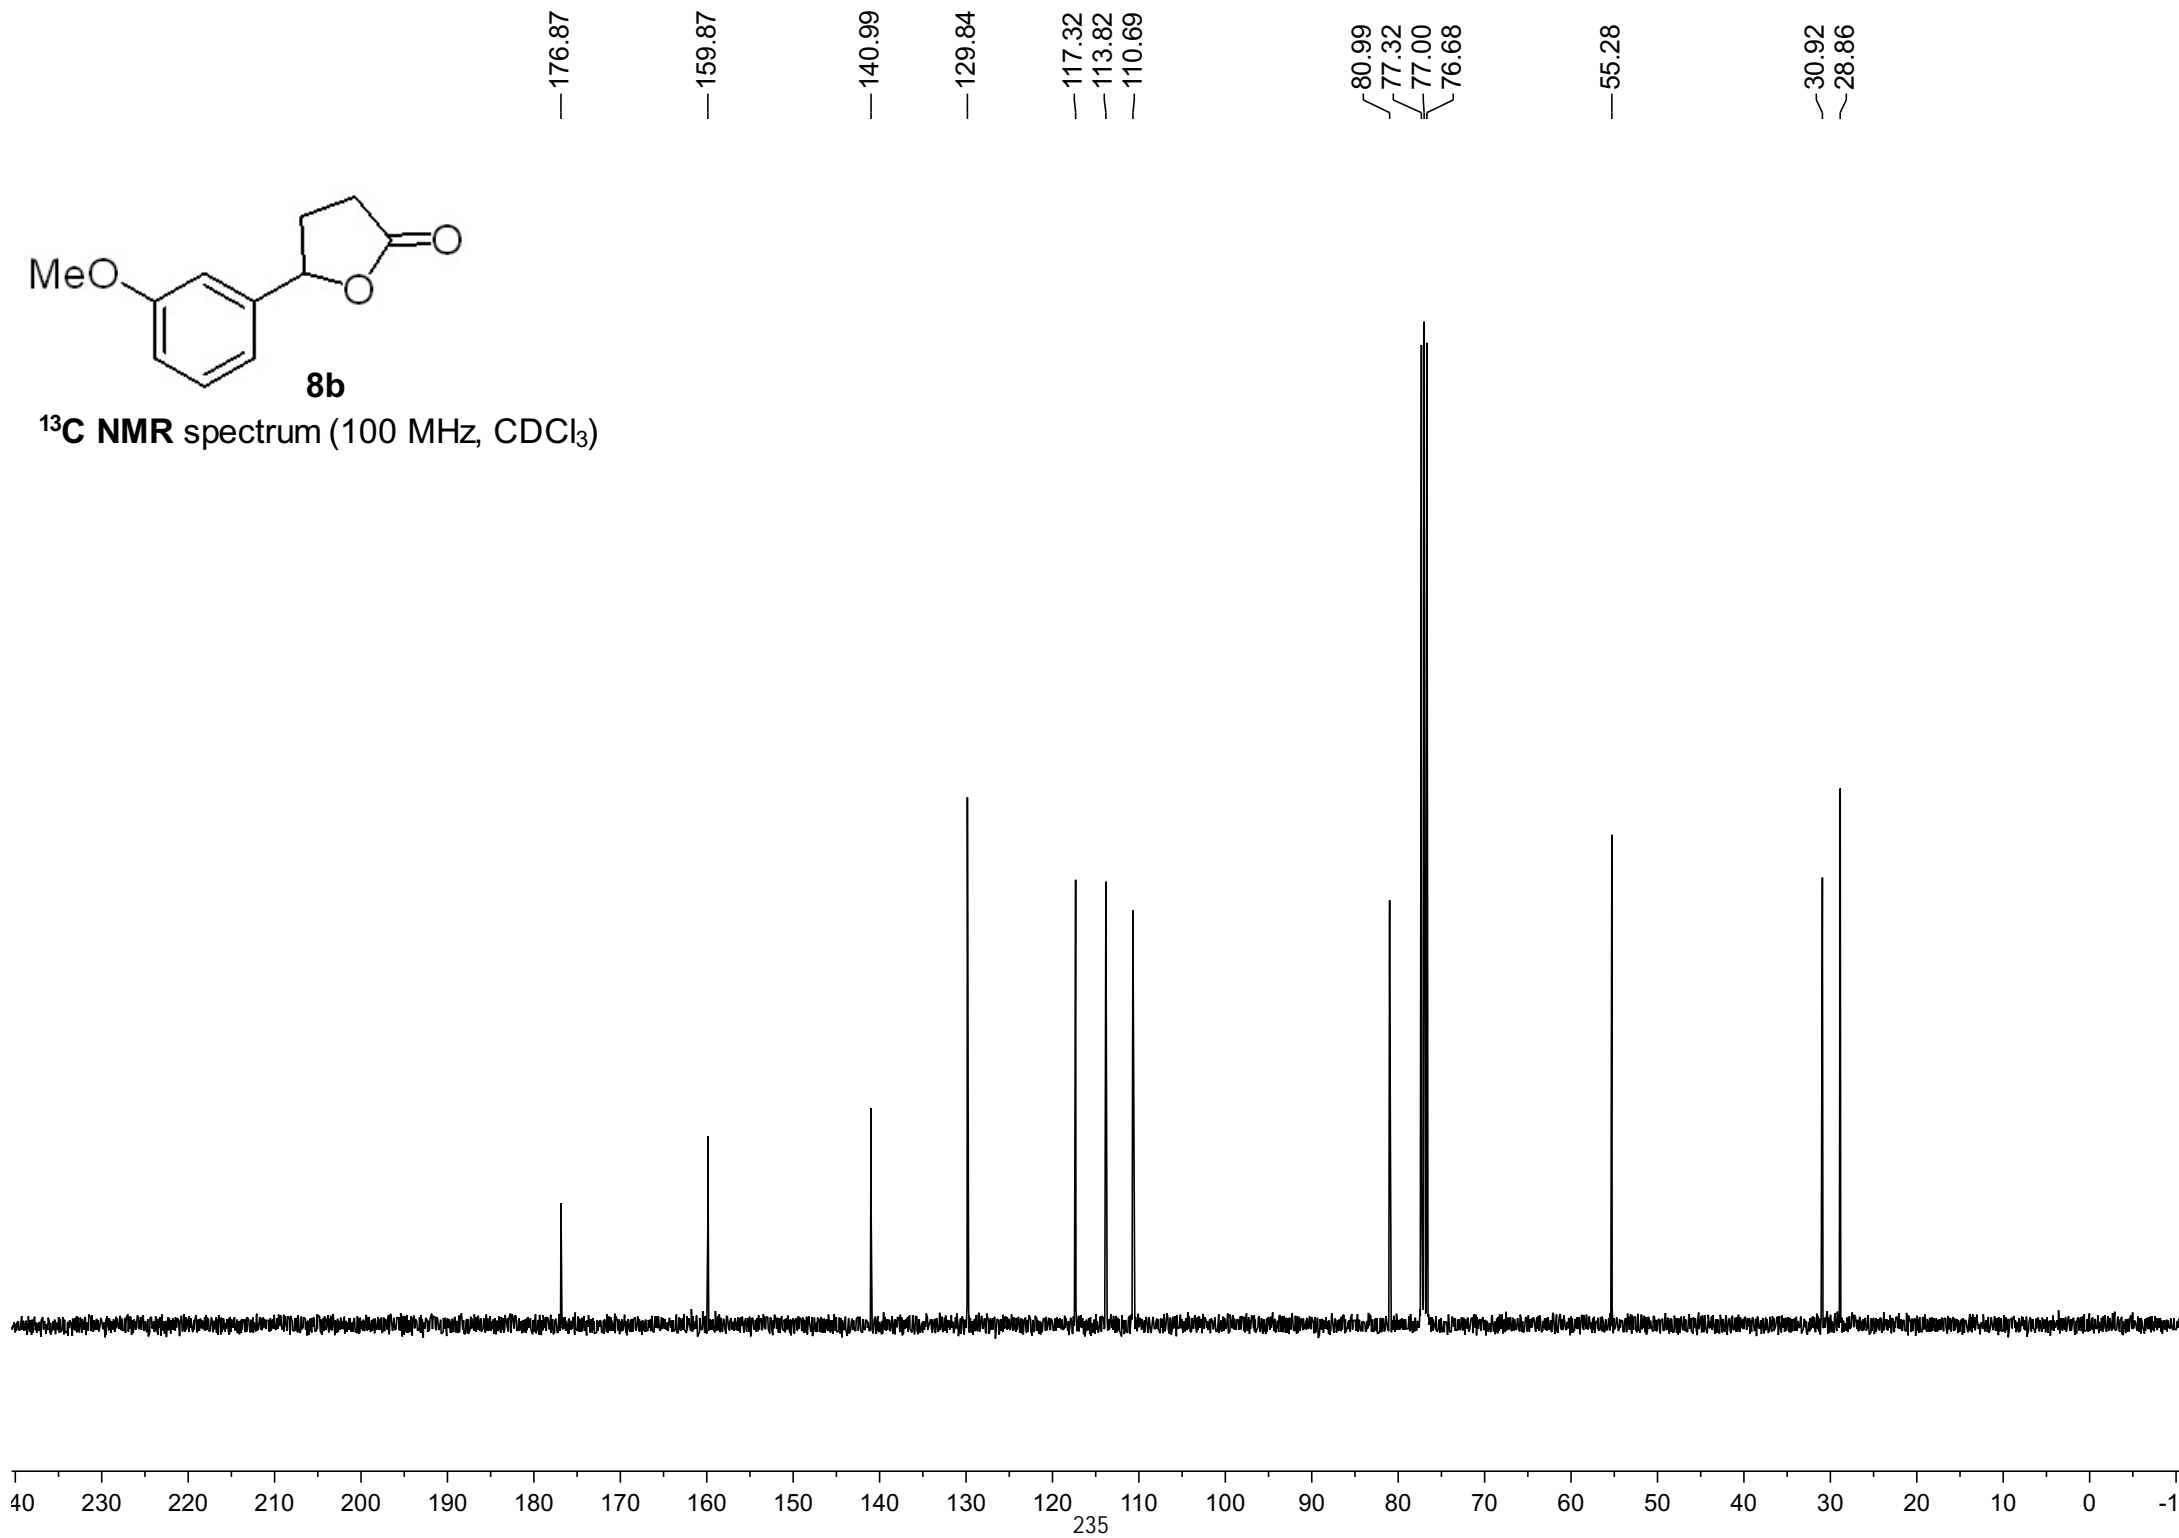



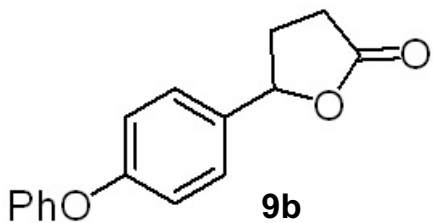

**<sup>1</sup>H NMR** spectrum (600 MHz, CDCl<sub>3</sub>)

7.360  
7.347  
7.334  
7.305  
7.290  
7.257  
7.138  
7.126  
7.114  
7.020  
7.005

5.495  
5.485  
5.482  
5.475  
5.471

2.694  
2.675  
2.665  
2.655  
2.652  
2.642  
2.639  
2.634  
2.624  
2.613  
2.249  
2.243  
2.237  
2.234  
2.224  
2.218  
2.215  
2.208  
2.206  
2.200  
2.194  
2.188  
2.176

—0.000

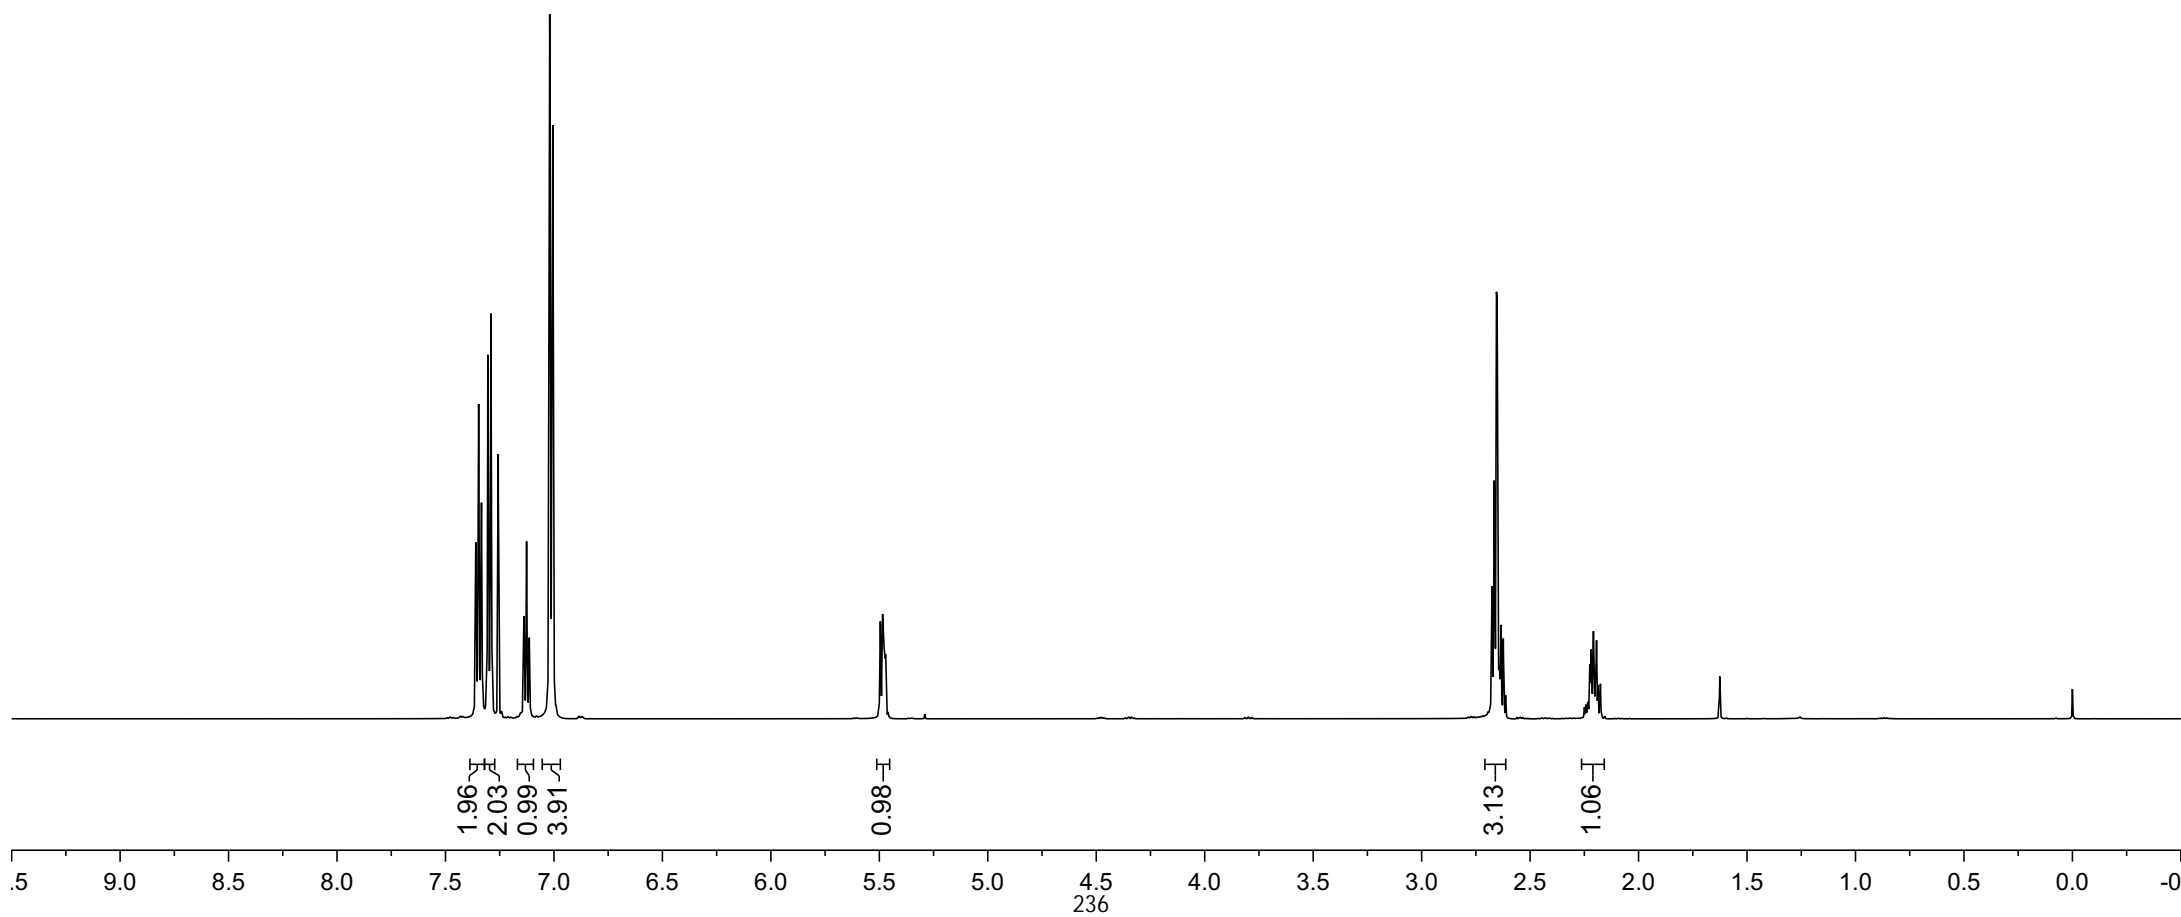

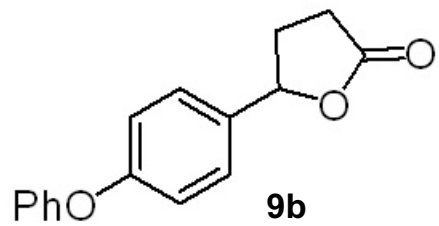

**<sup>13</sup>C NMR spectrum (150 MHz, CDCl<sub>3</sub>)**

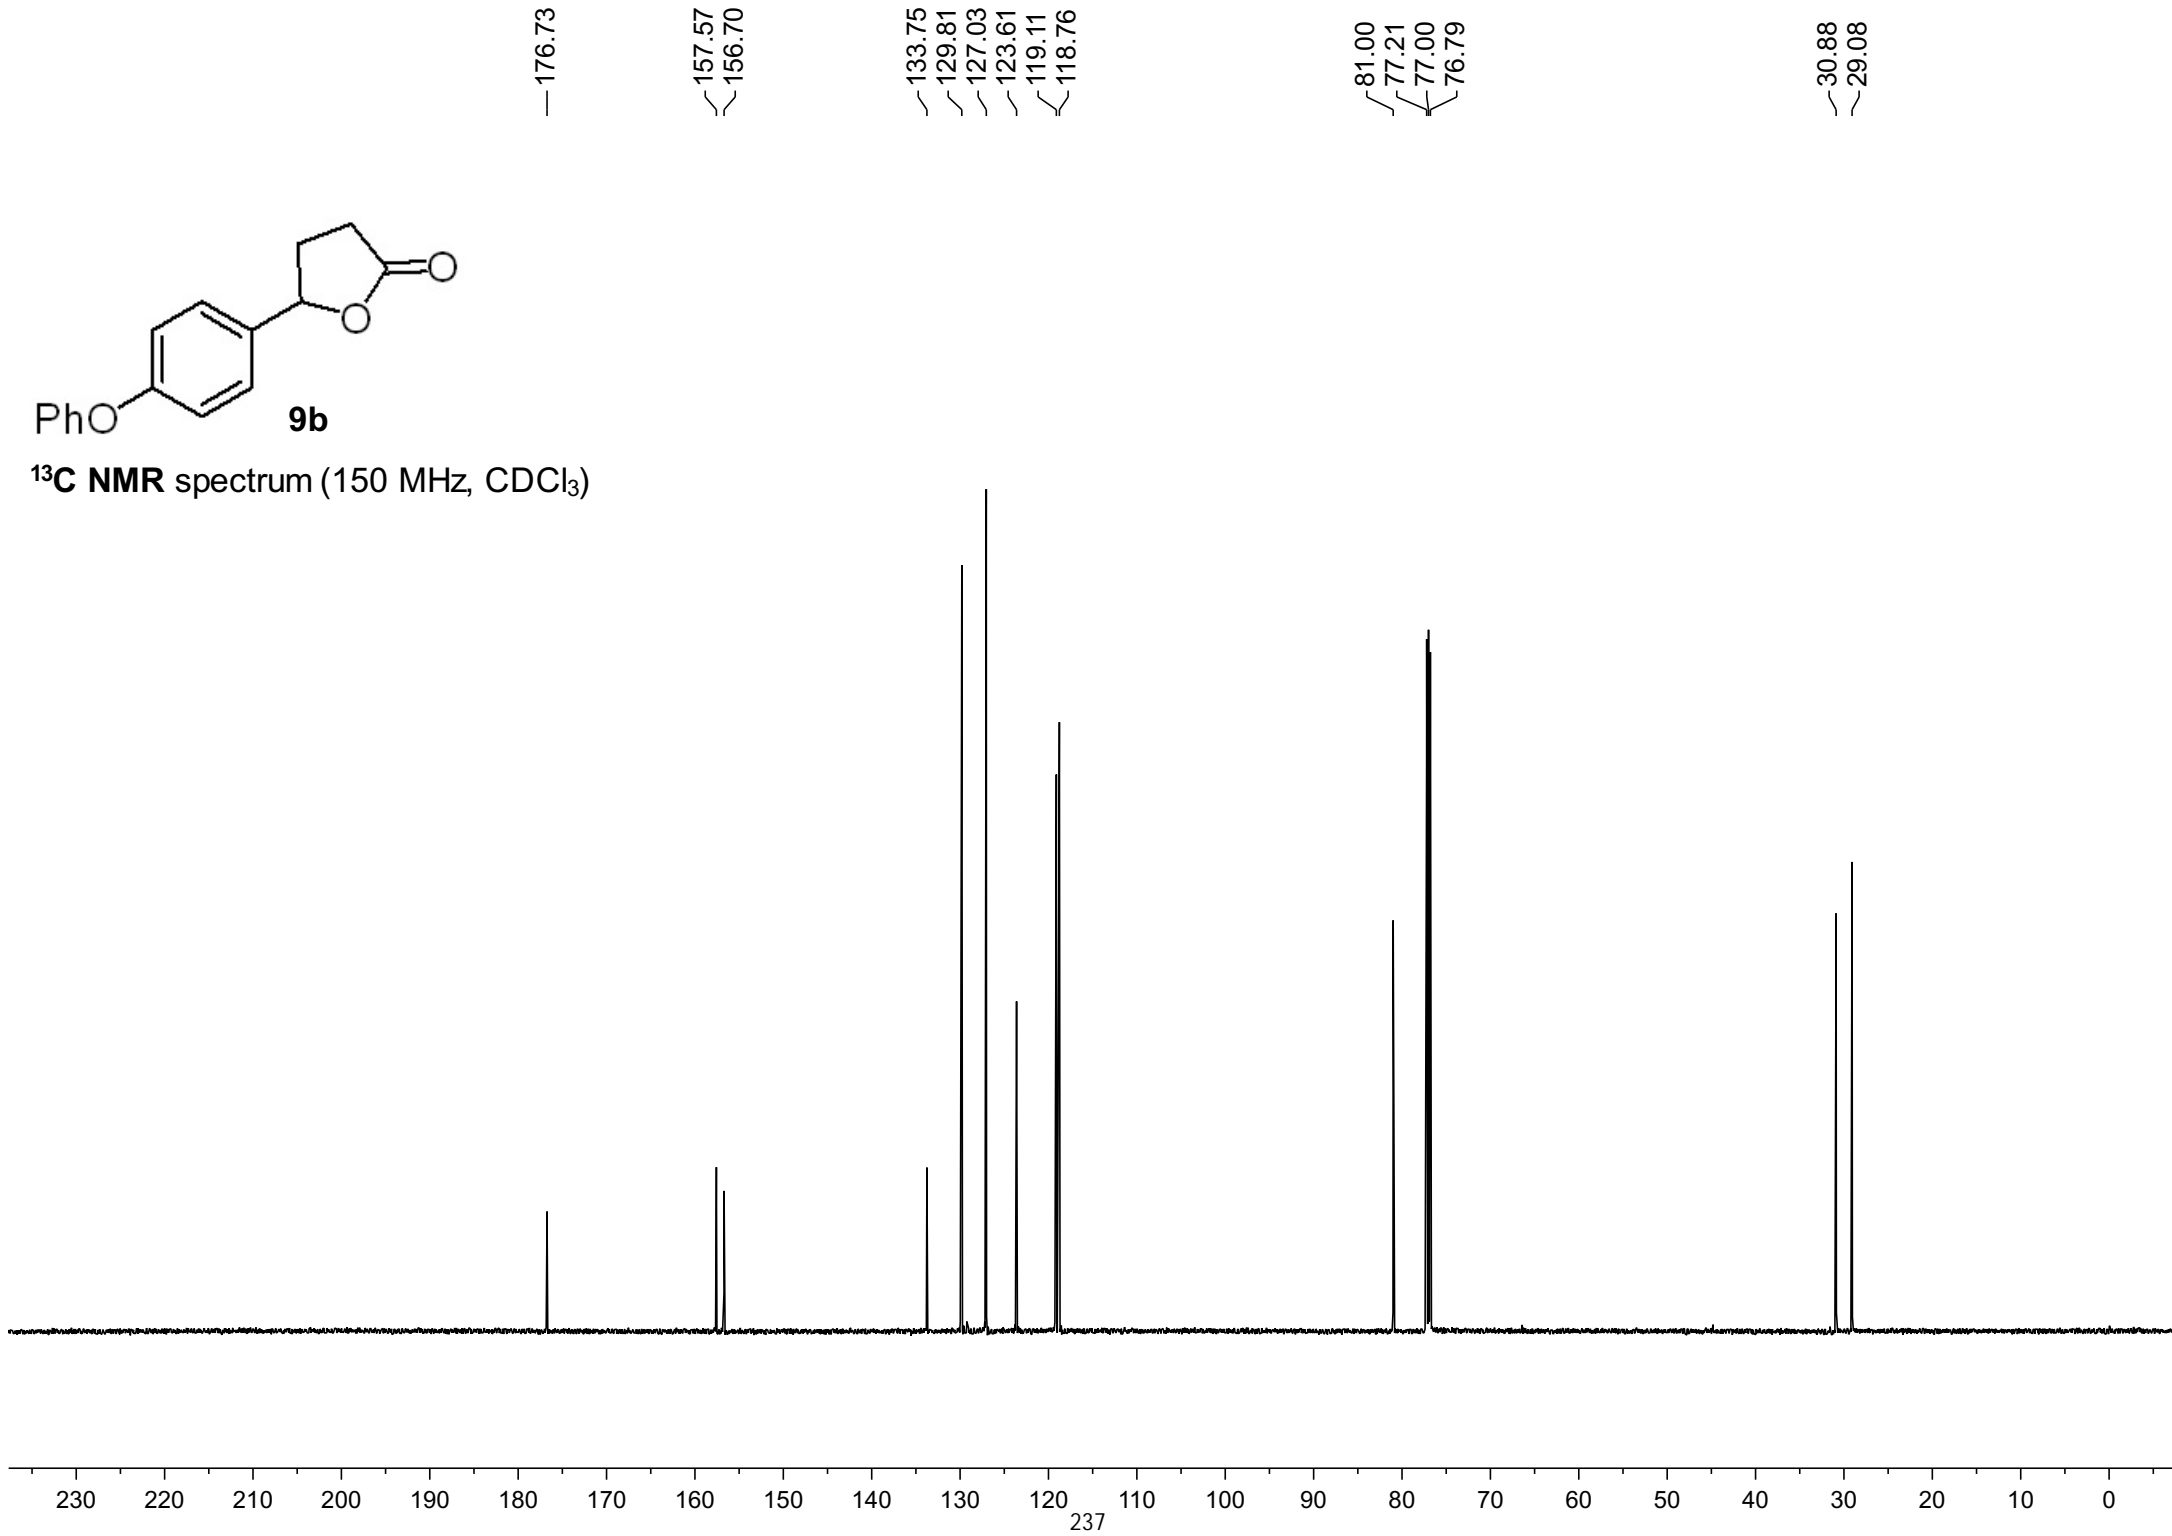

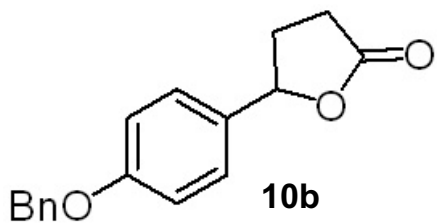

<sup>1</sup>H NMR spectrum (600 MHz, CDCl<sub>3</sub>)

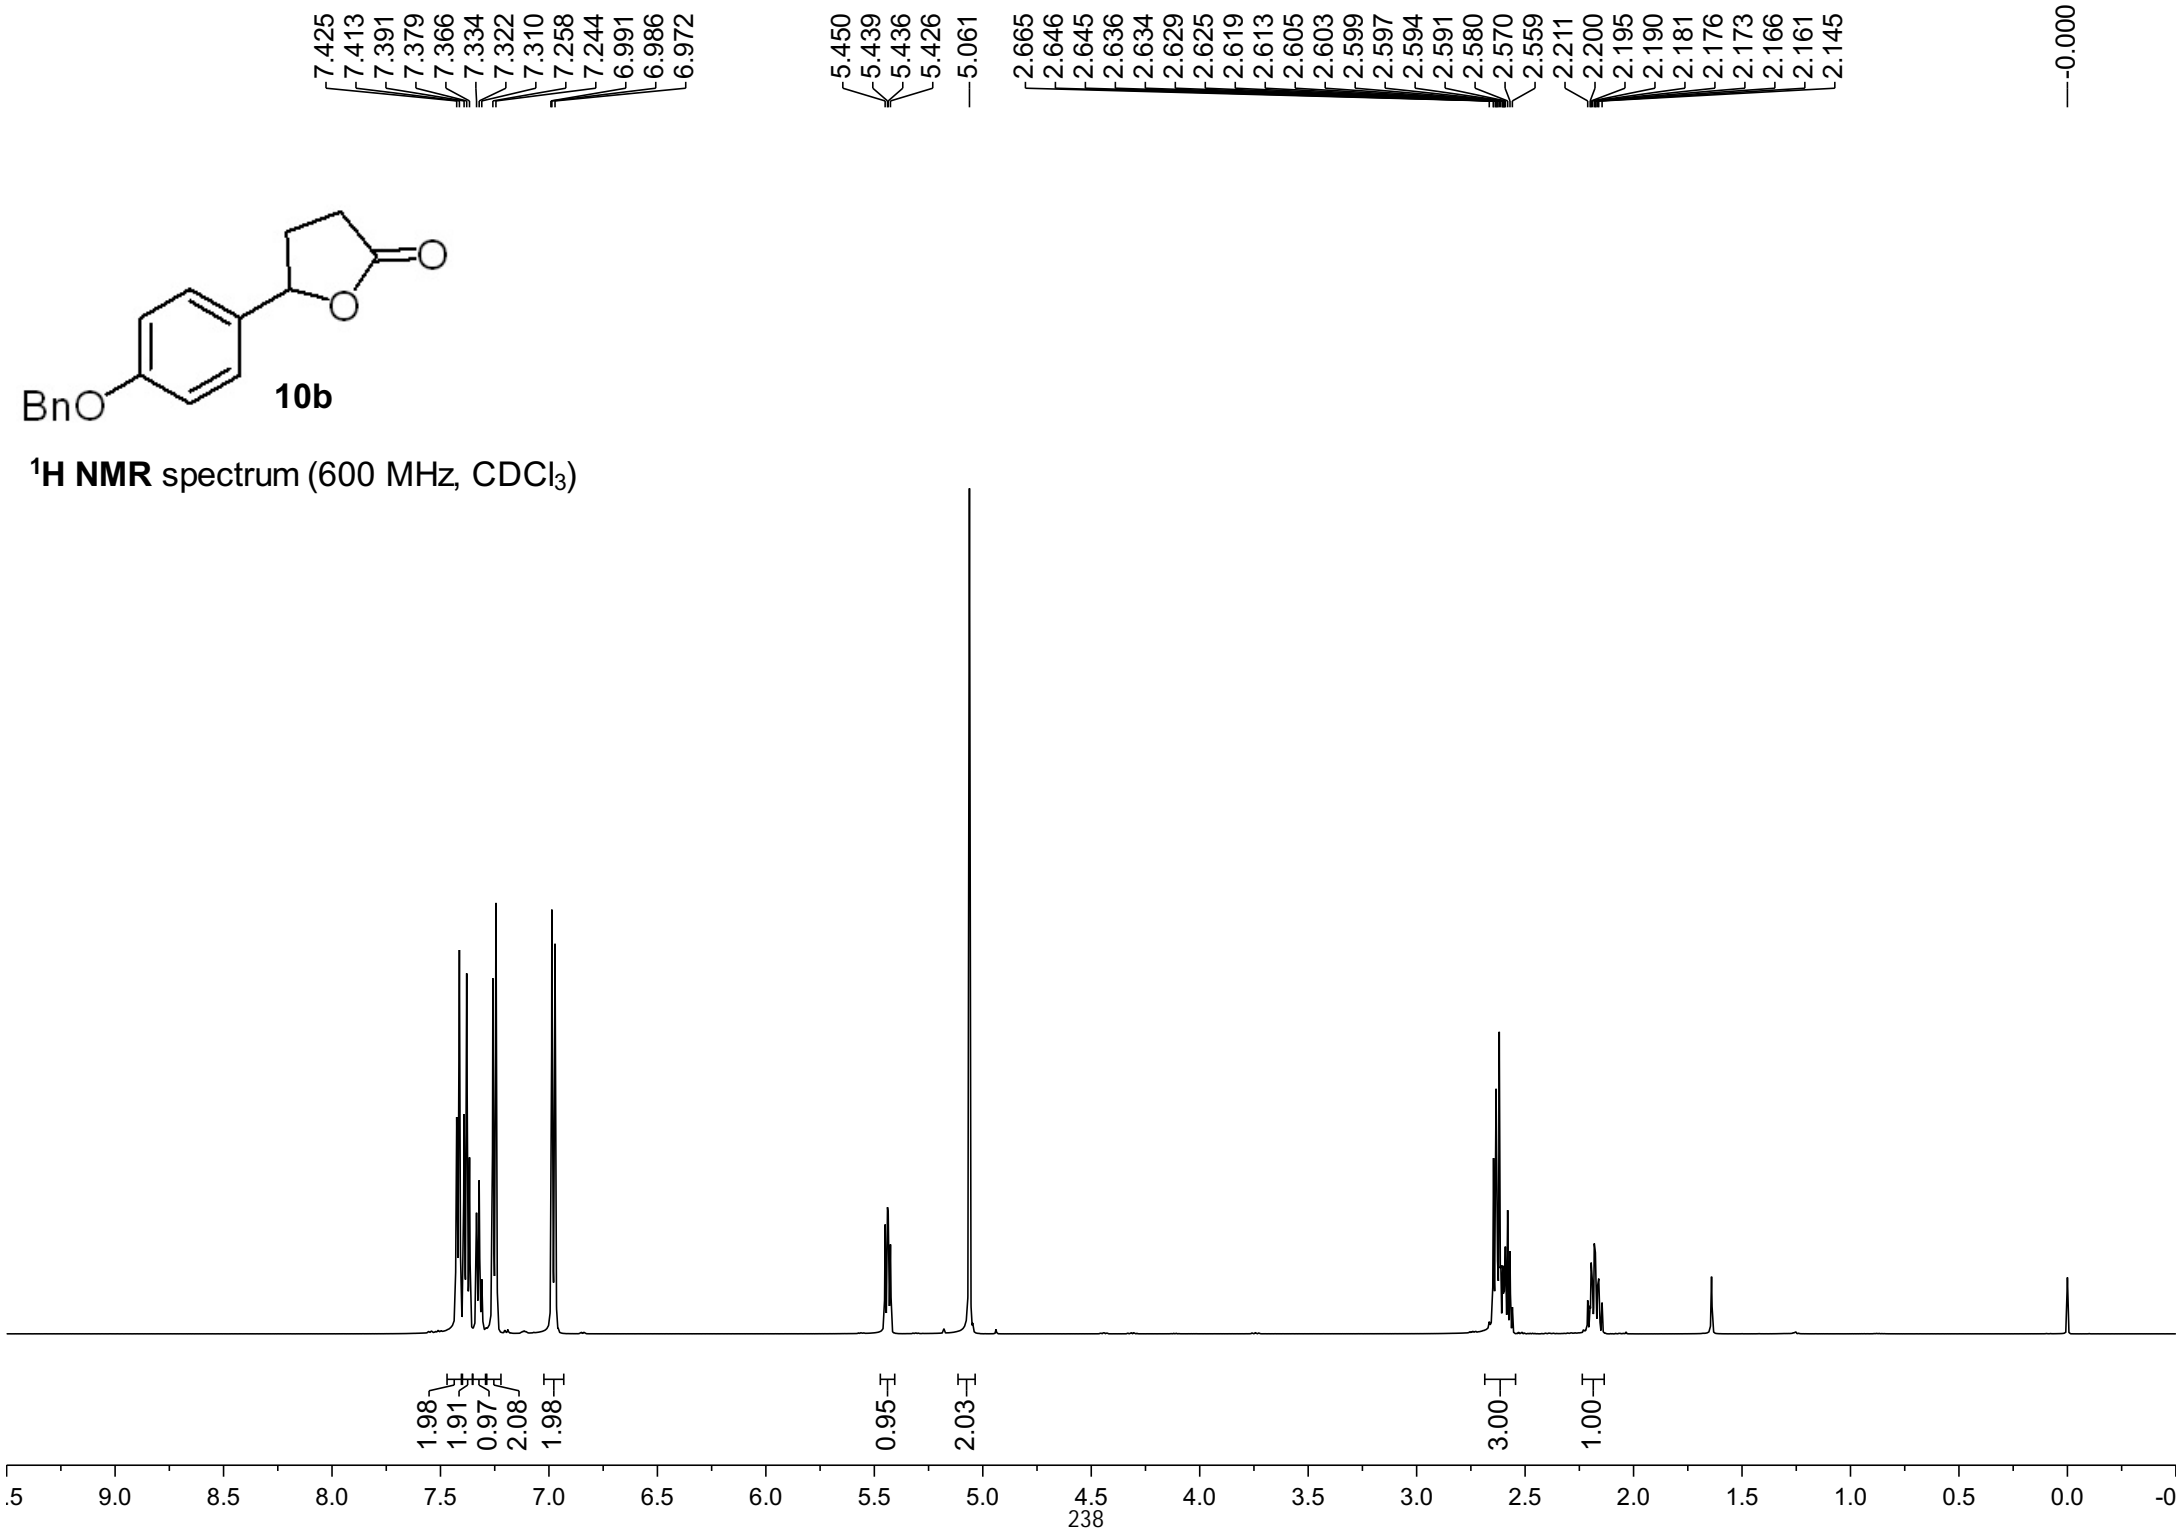

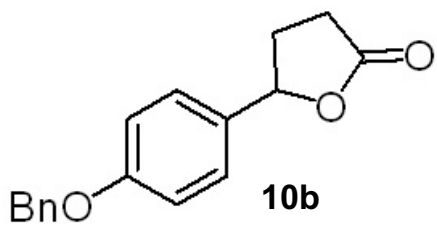

<sup>13</sup>C NMR spectrum (150 MHz, CDCl<sub>3</sub>)

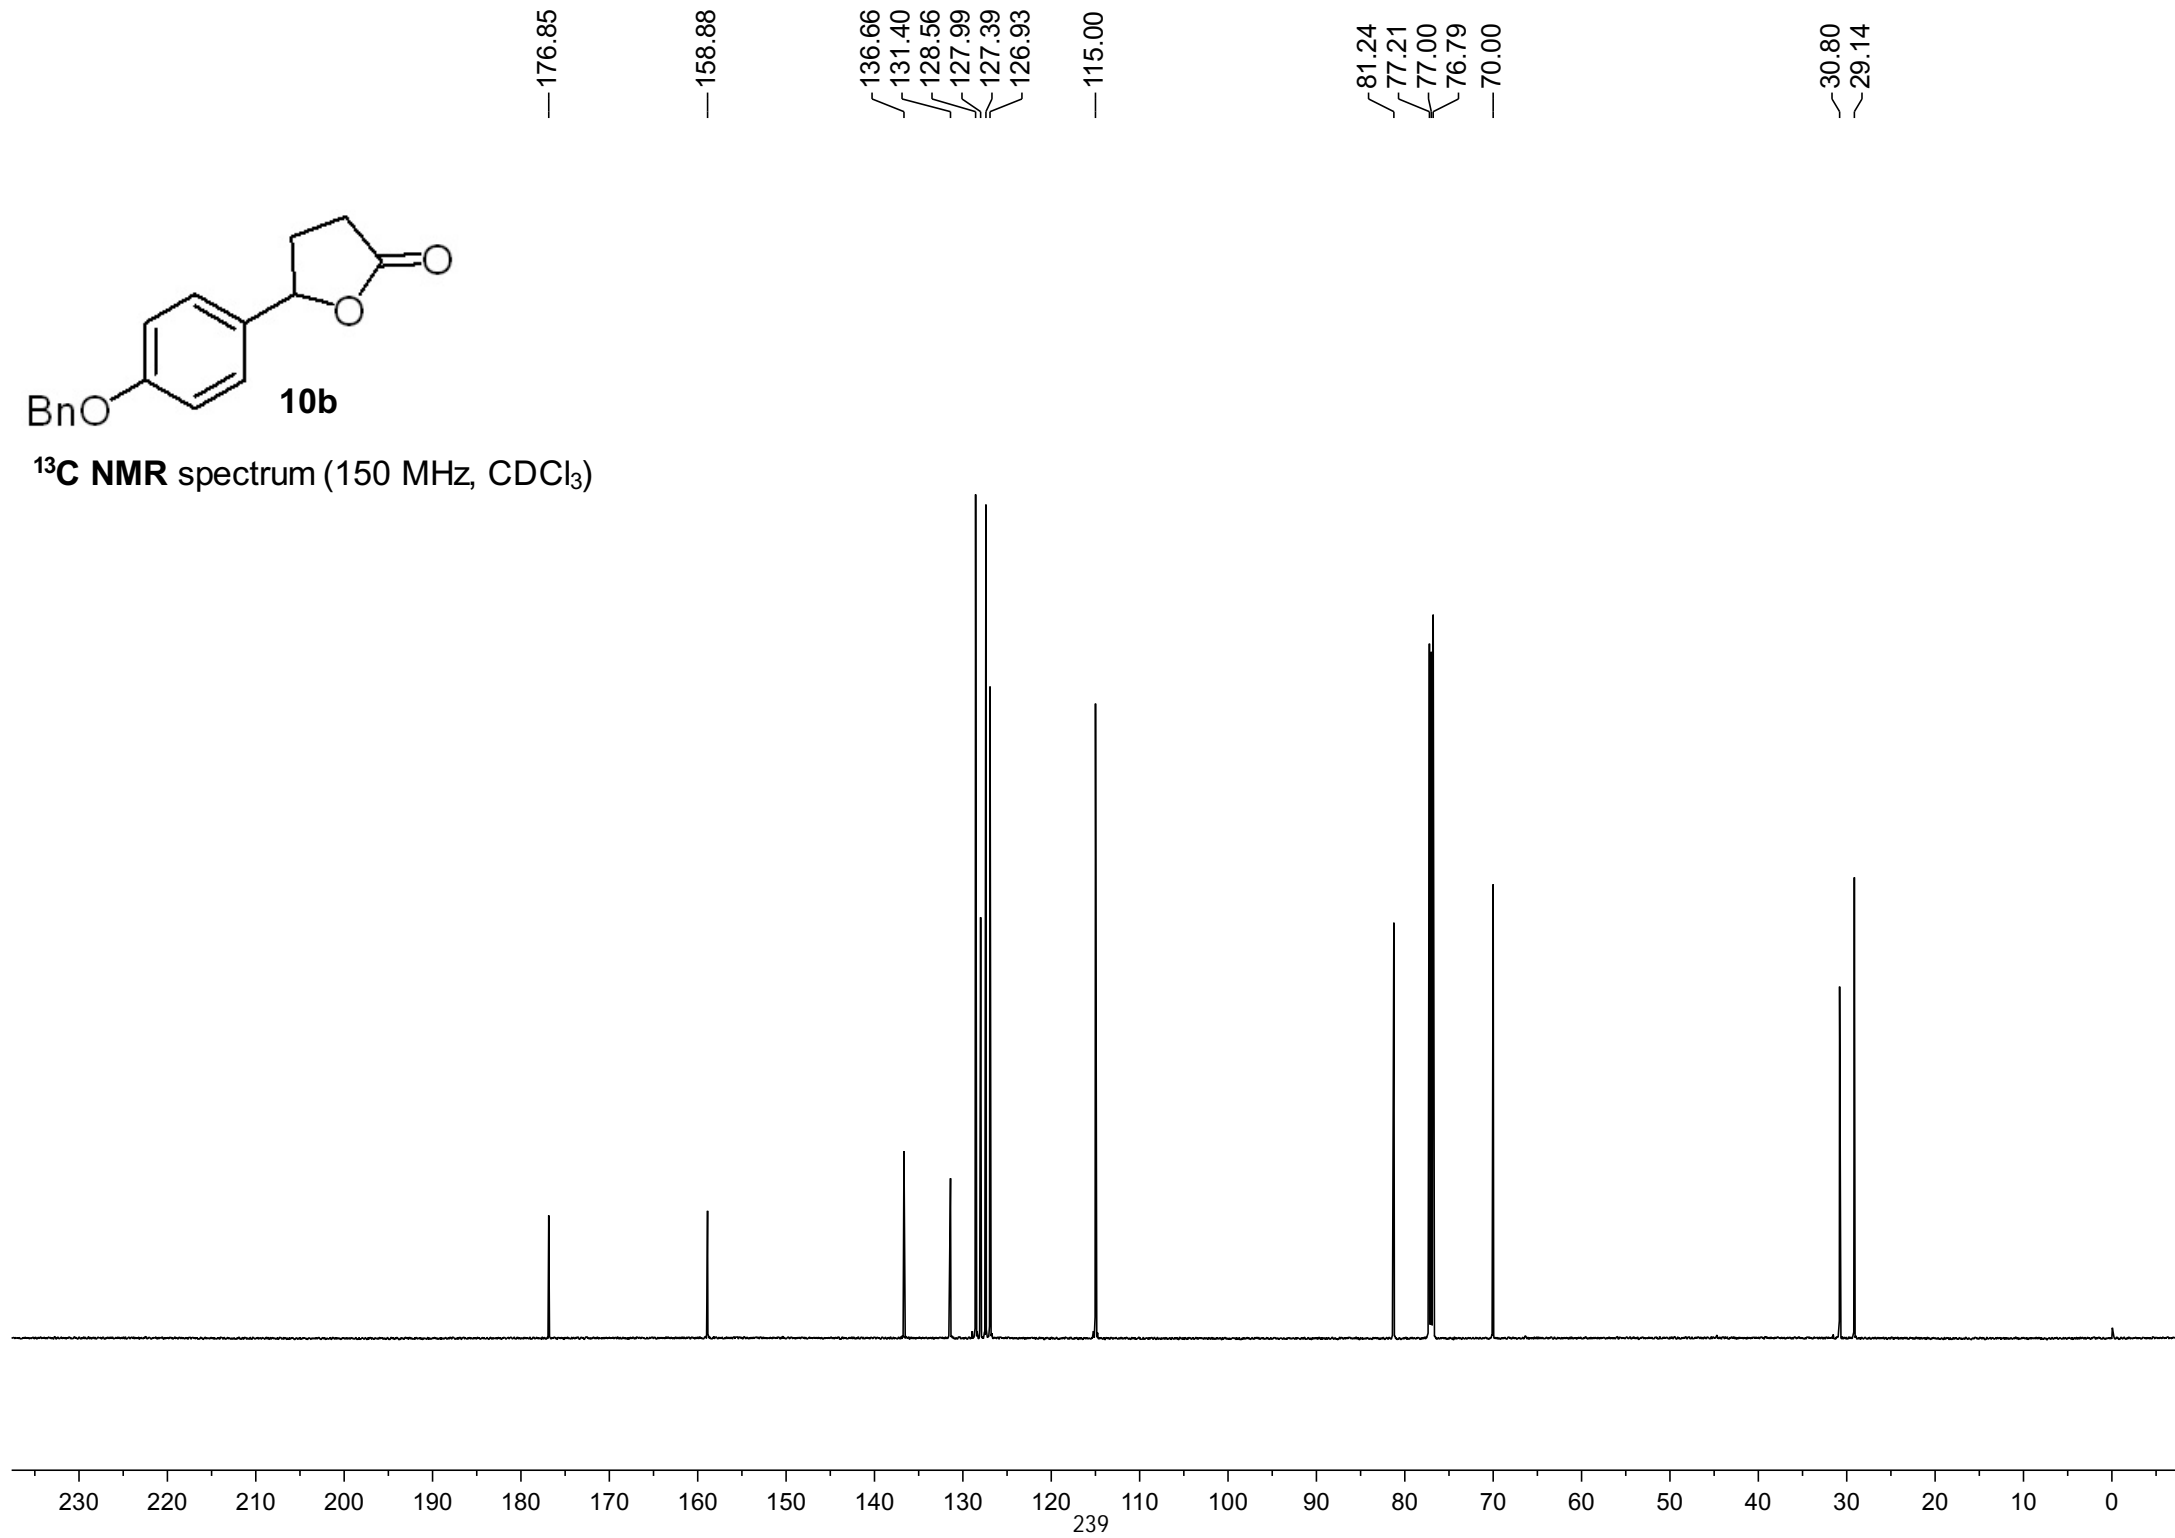

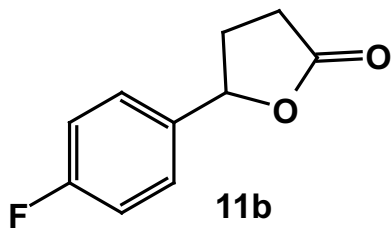

<sup>1</sup>H NMR spectrum (600 MHz, CDCl<sub>3</sub>)

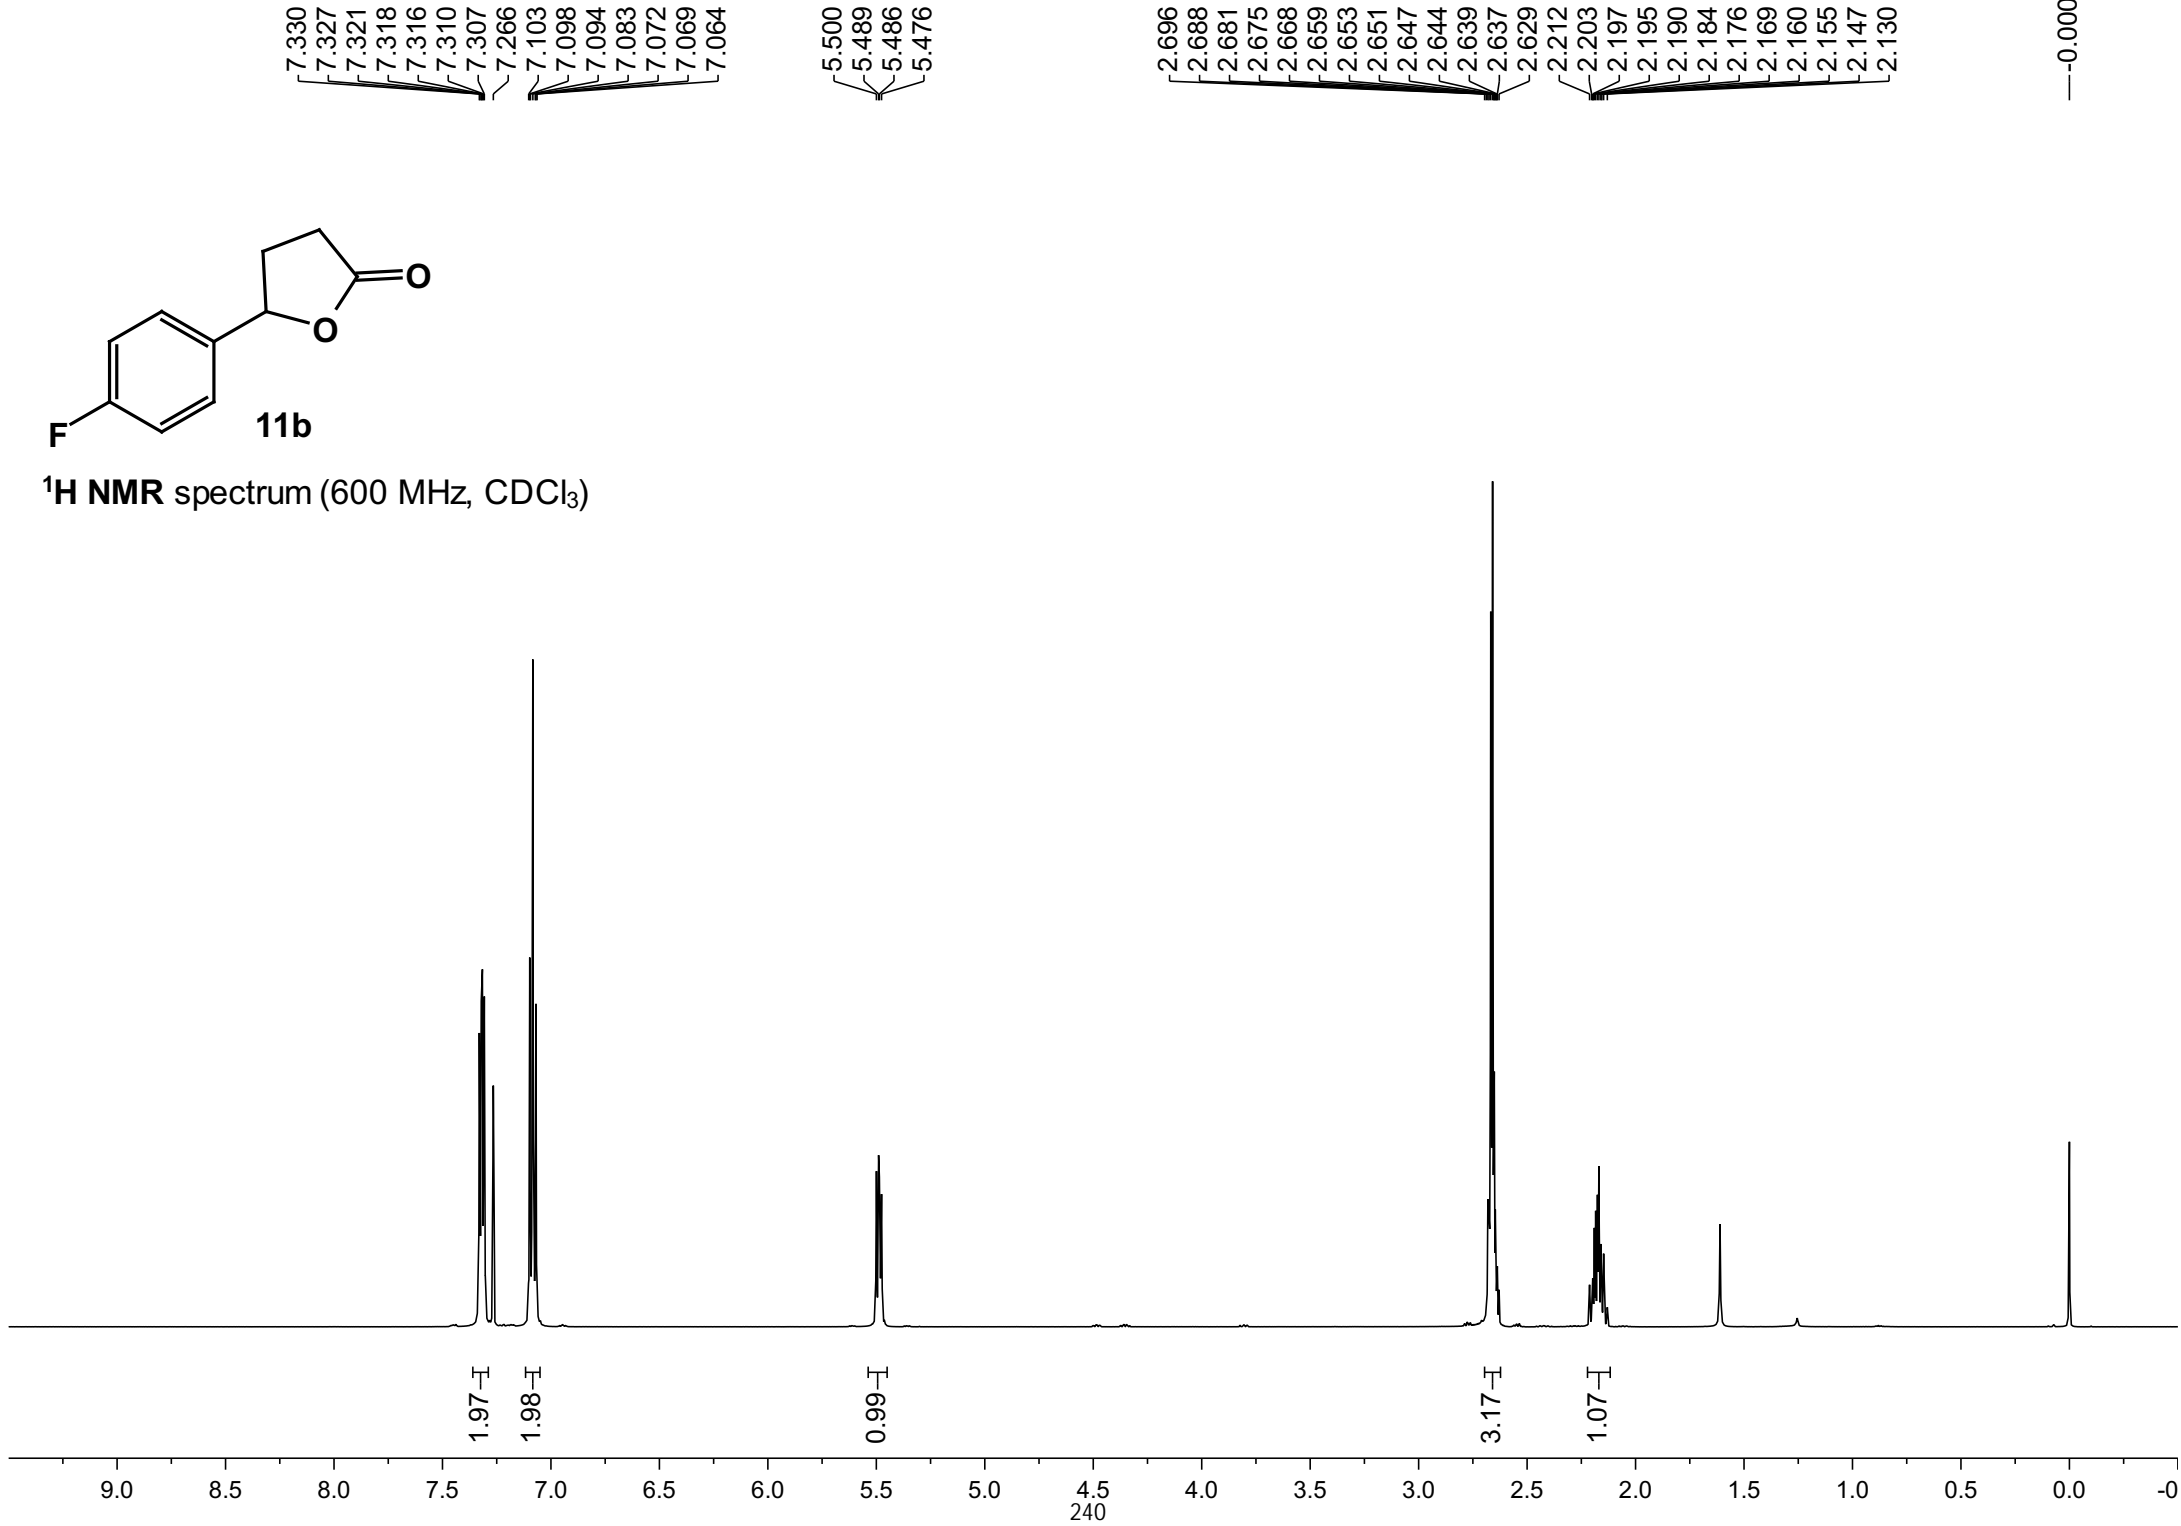

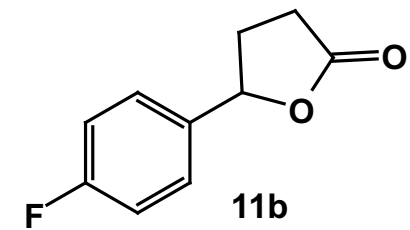

<sup>13</sup>C NMR spectrum (150 MHz, CDCl<sub>3</sub>)

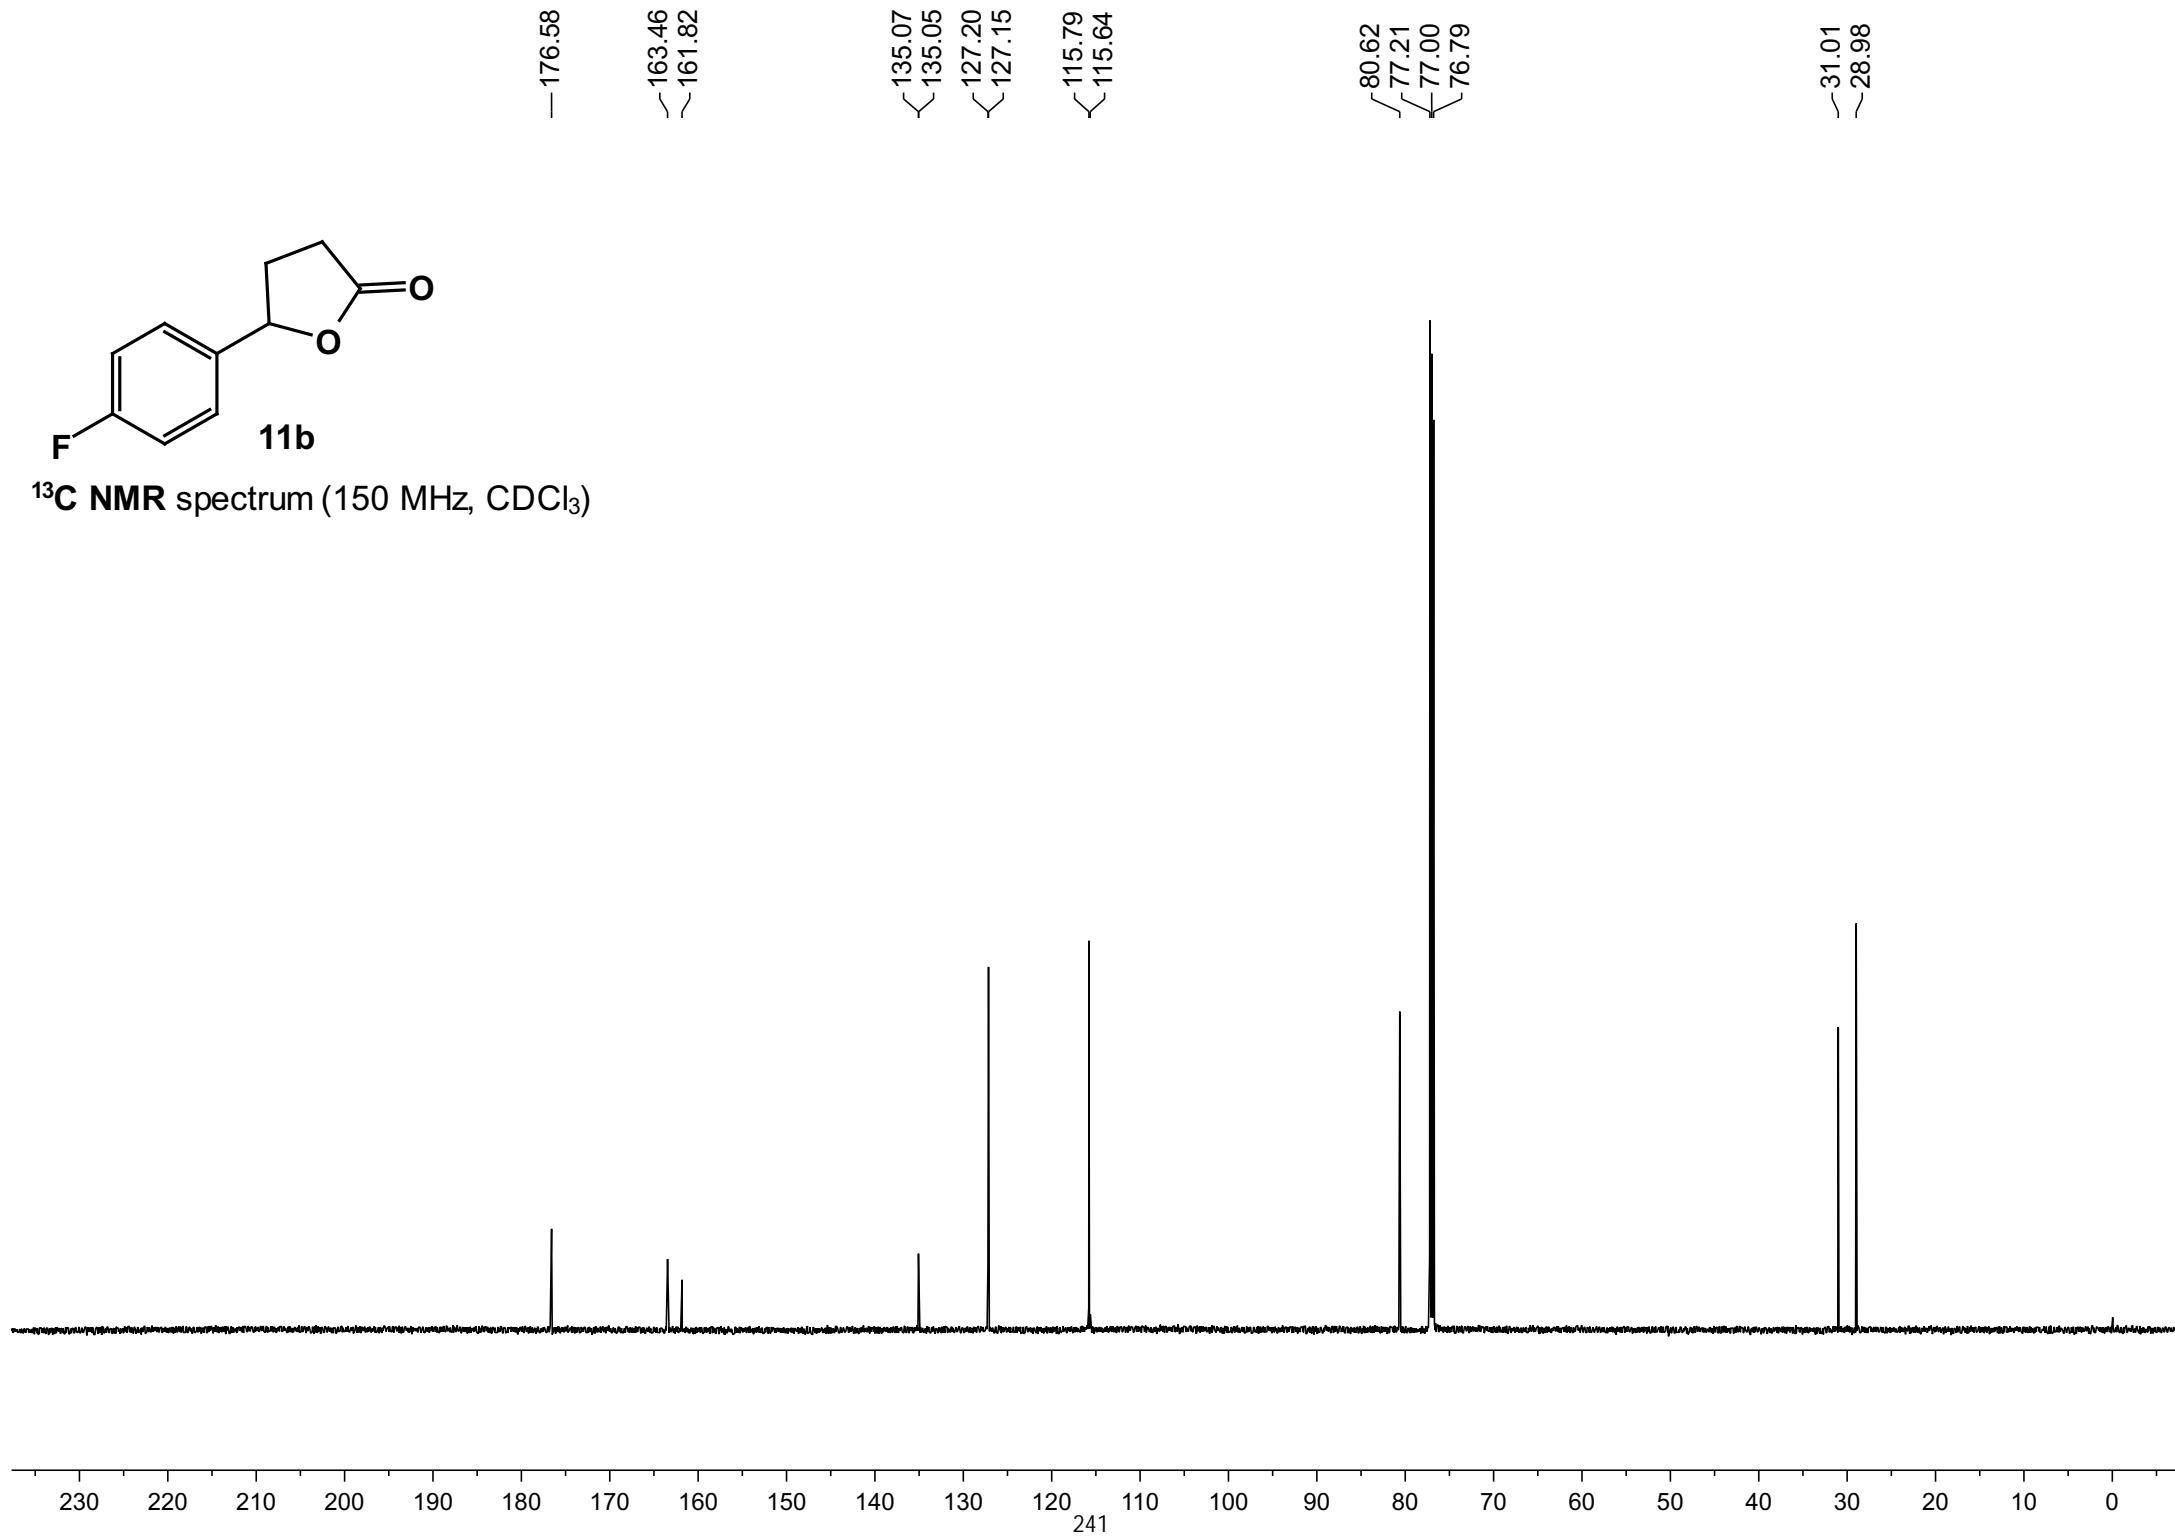

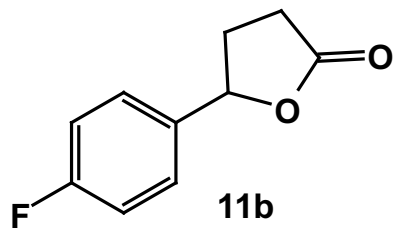

<sup>19</sup>F NMR spectrum (376 MHz, CDCl<sub>3</sub>)

---113.31

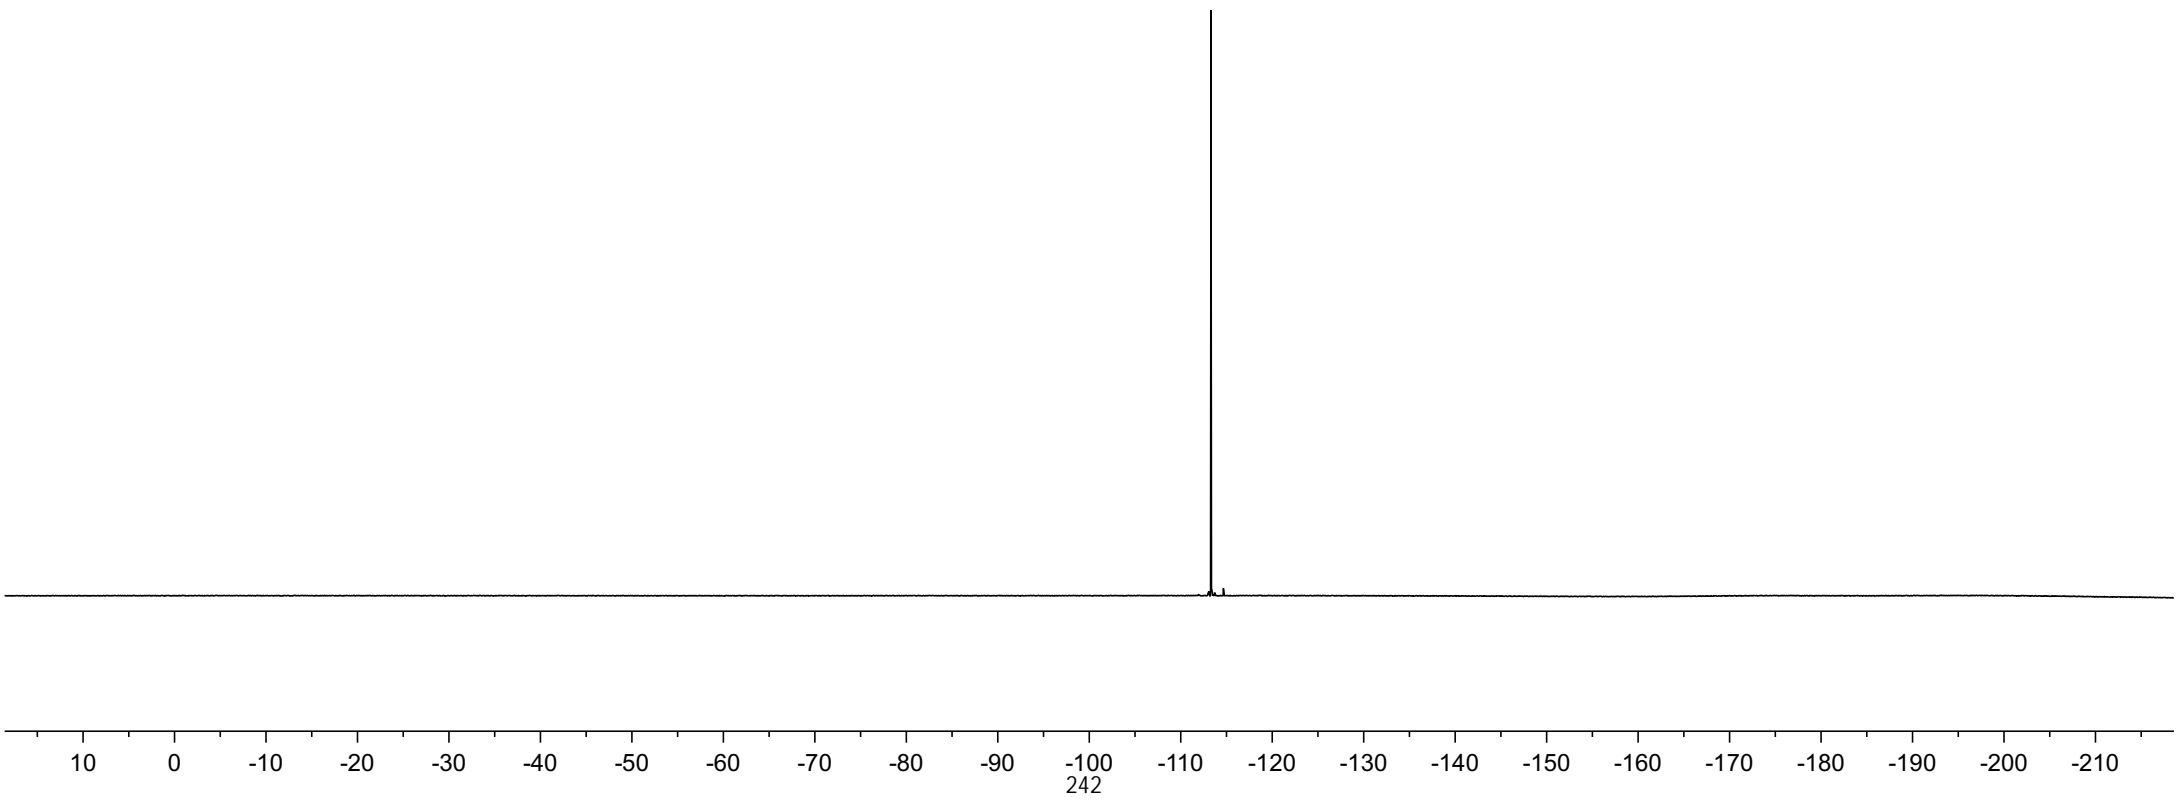

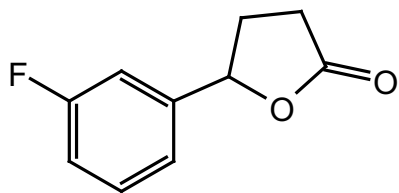

**12b**

<sup>1</sup>H NMR spectrum (600 MHz, CDCl<sub>3</sub>)

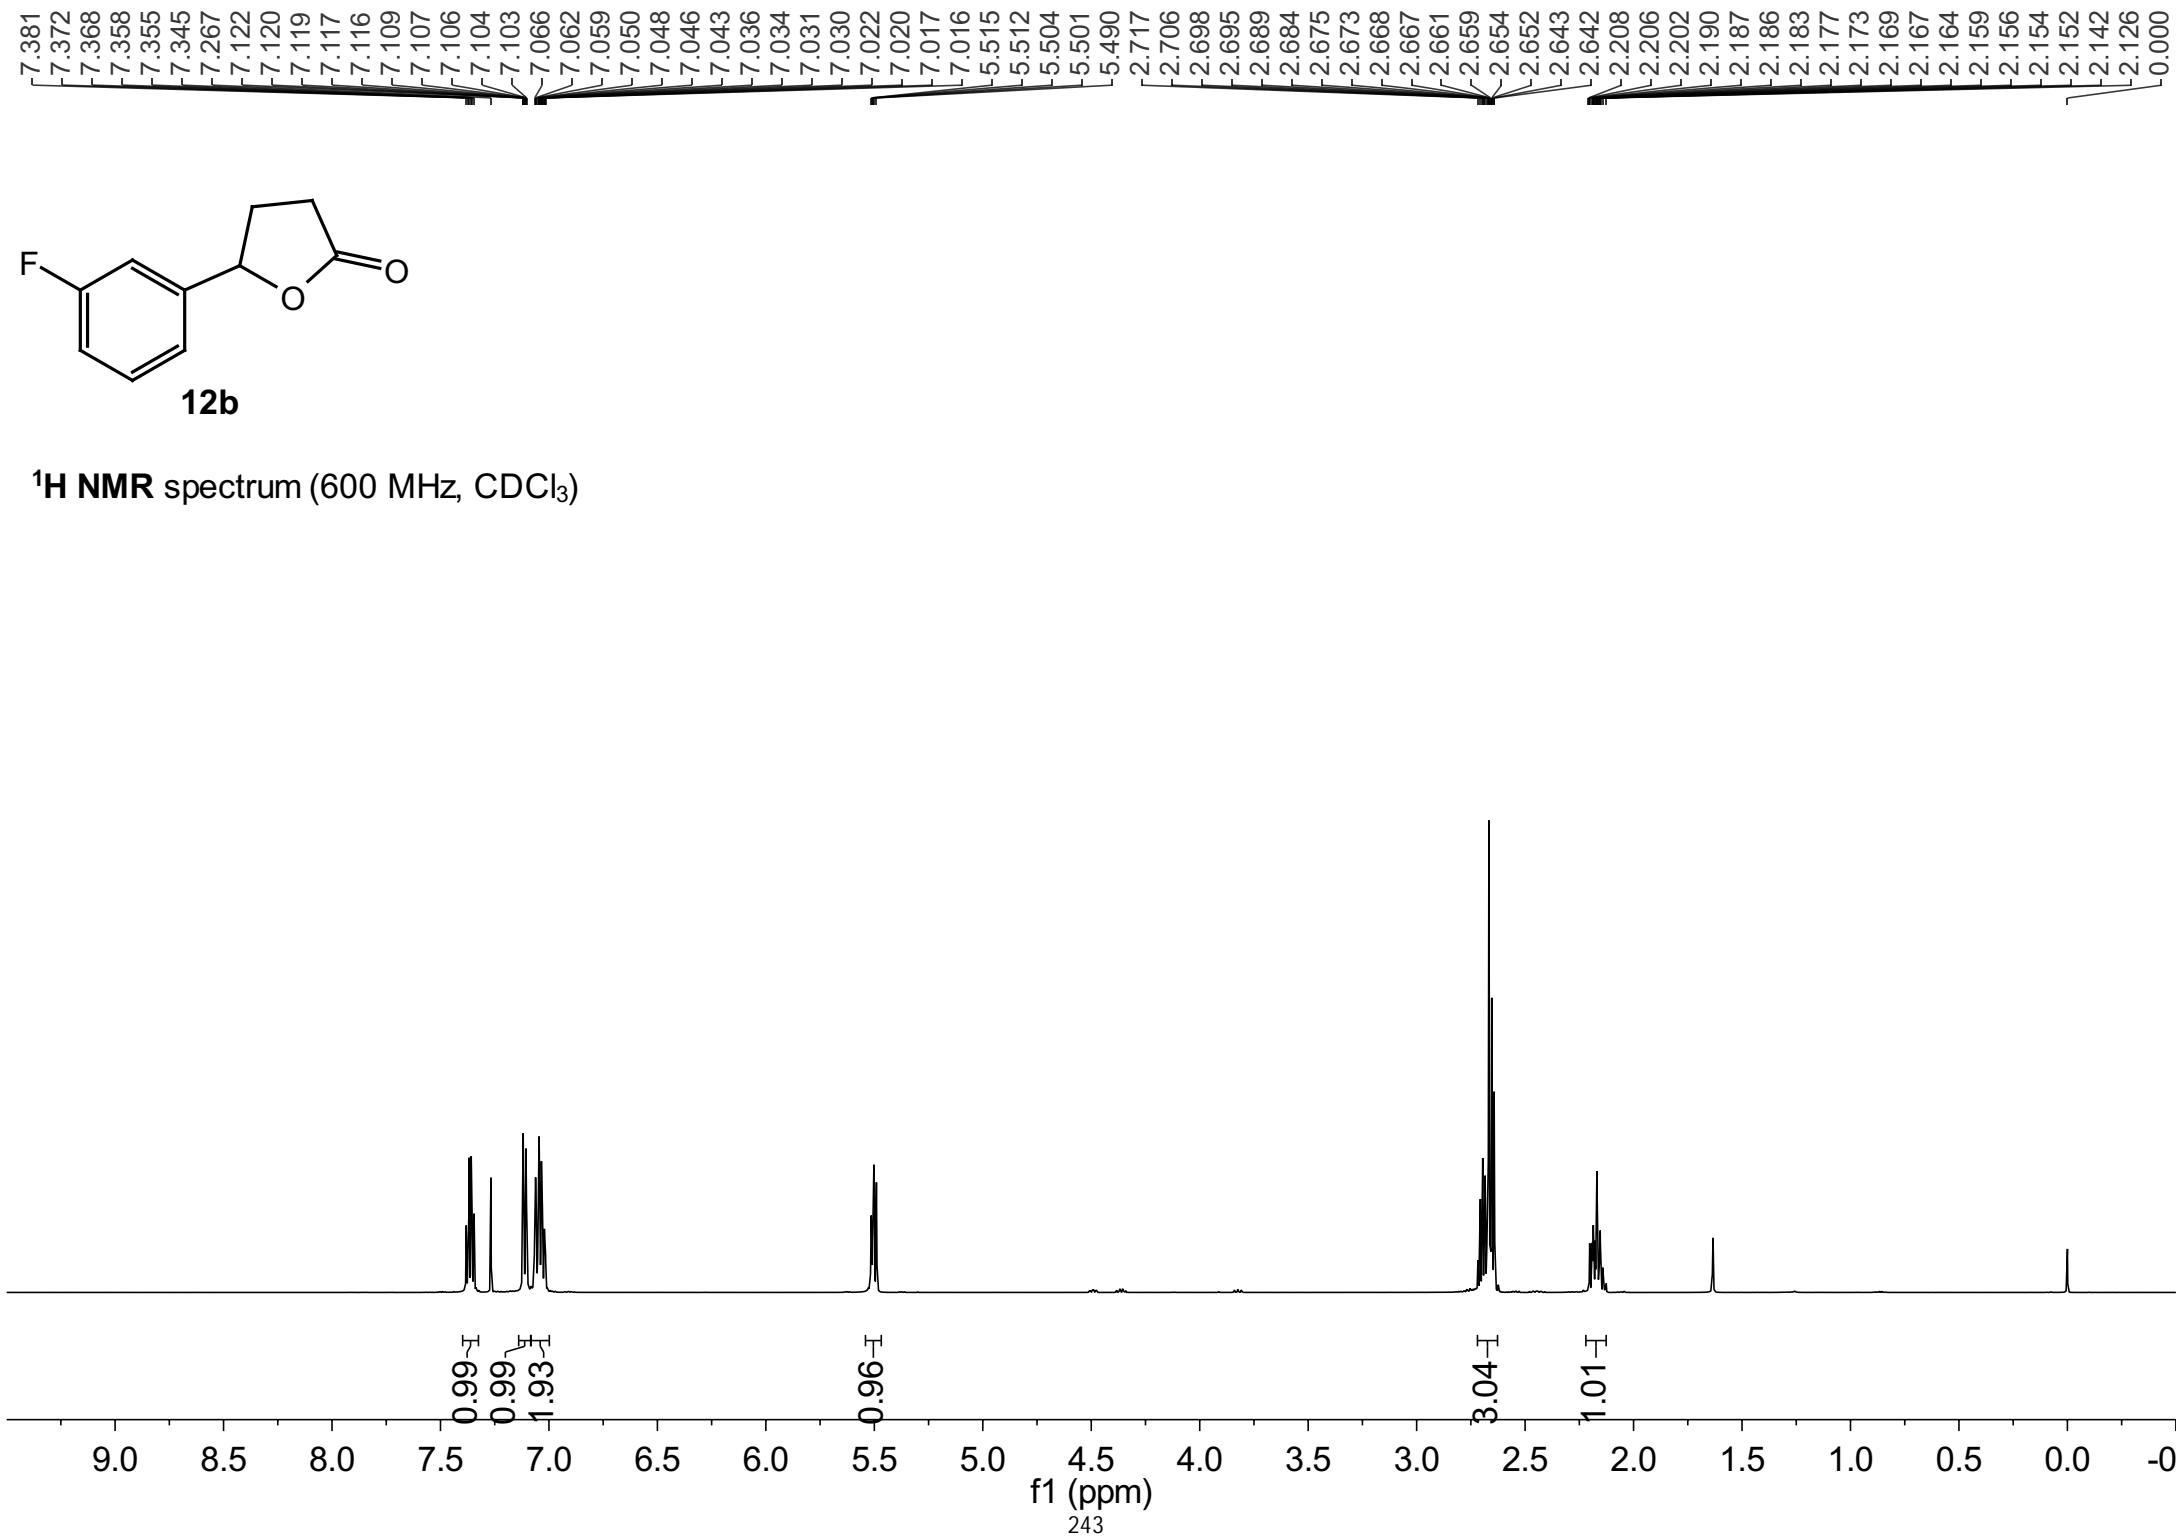



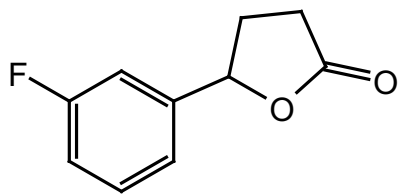

**12b**

<sup>13</sup>C NMR spectrum (150 MHz, CDCl<sub>3</sub>)

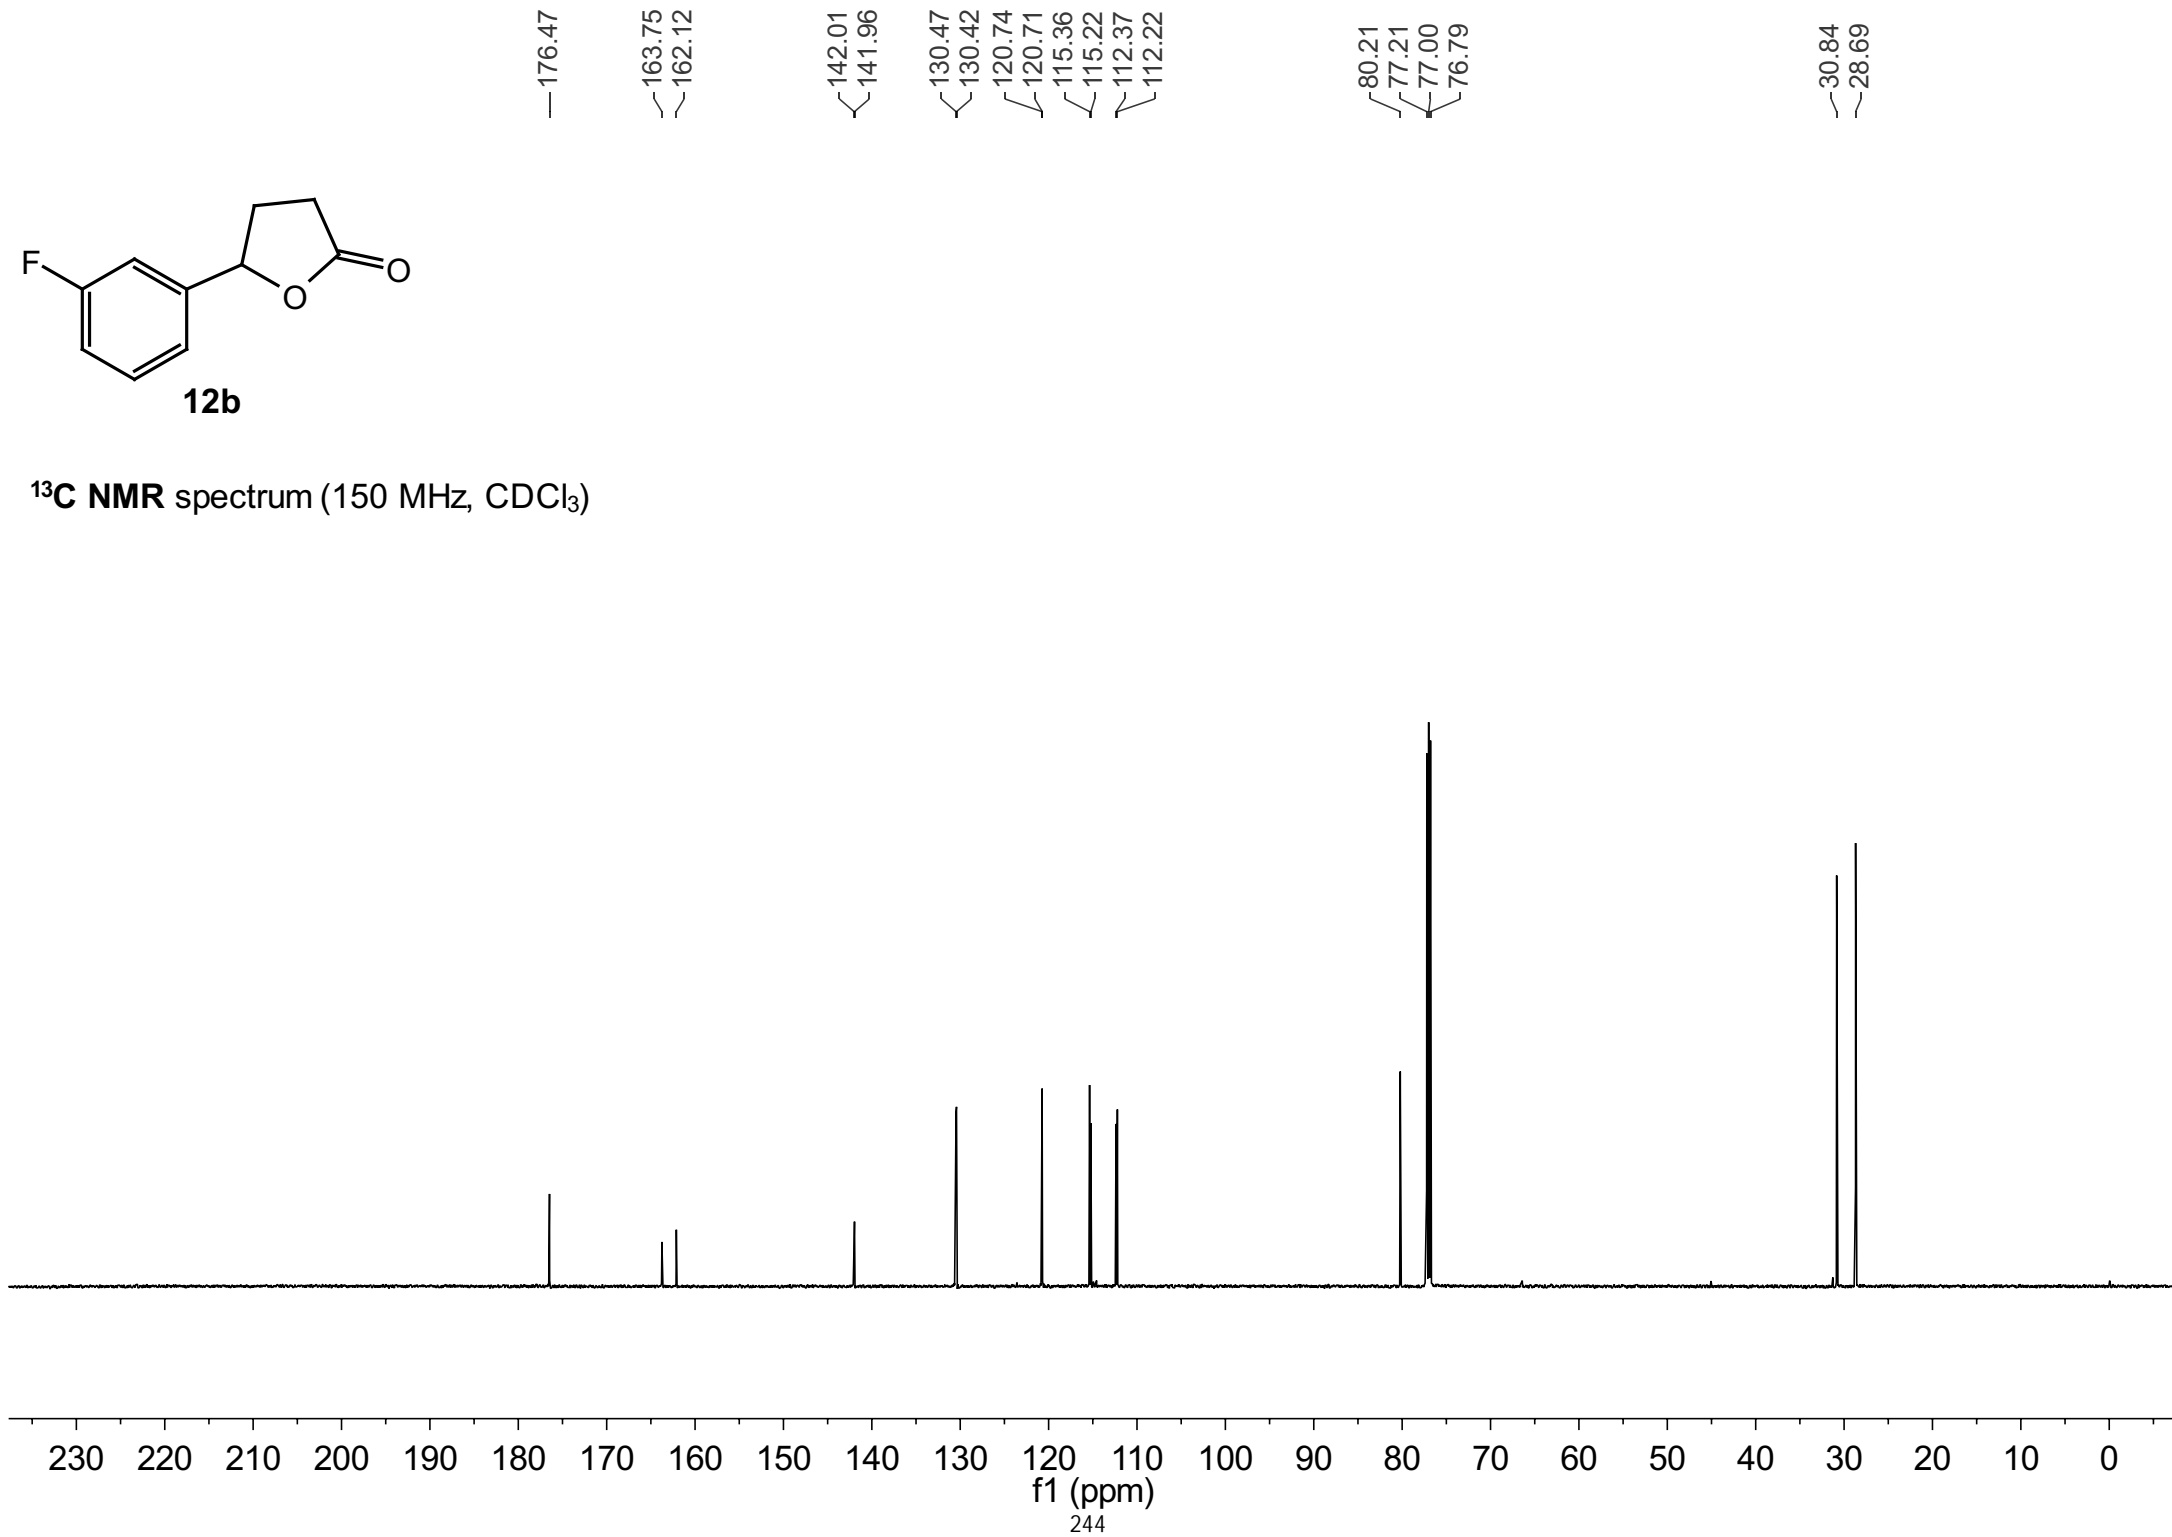

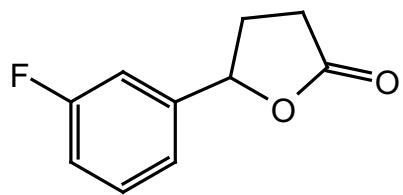

**12b**

<sup>19</sup>F NMR spectrum (376 MHz, CDCl<sub>3</sub>)

---111.93

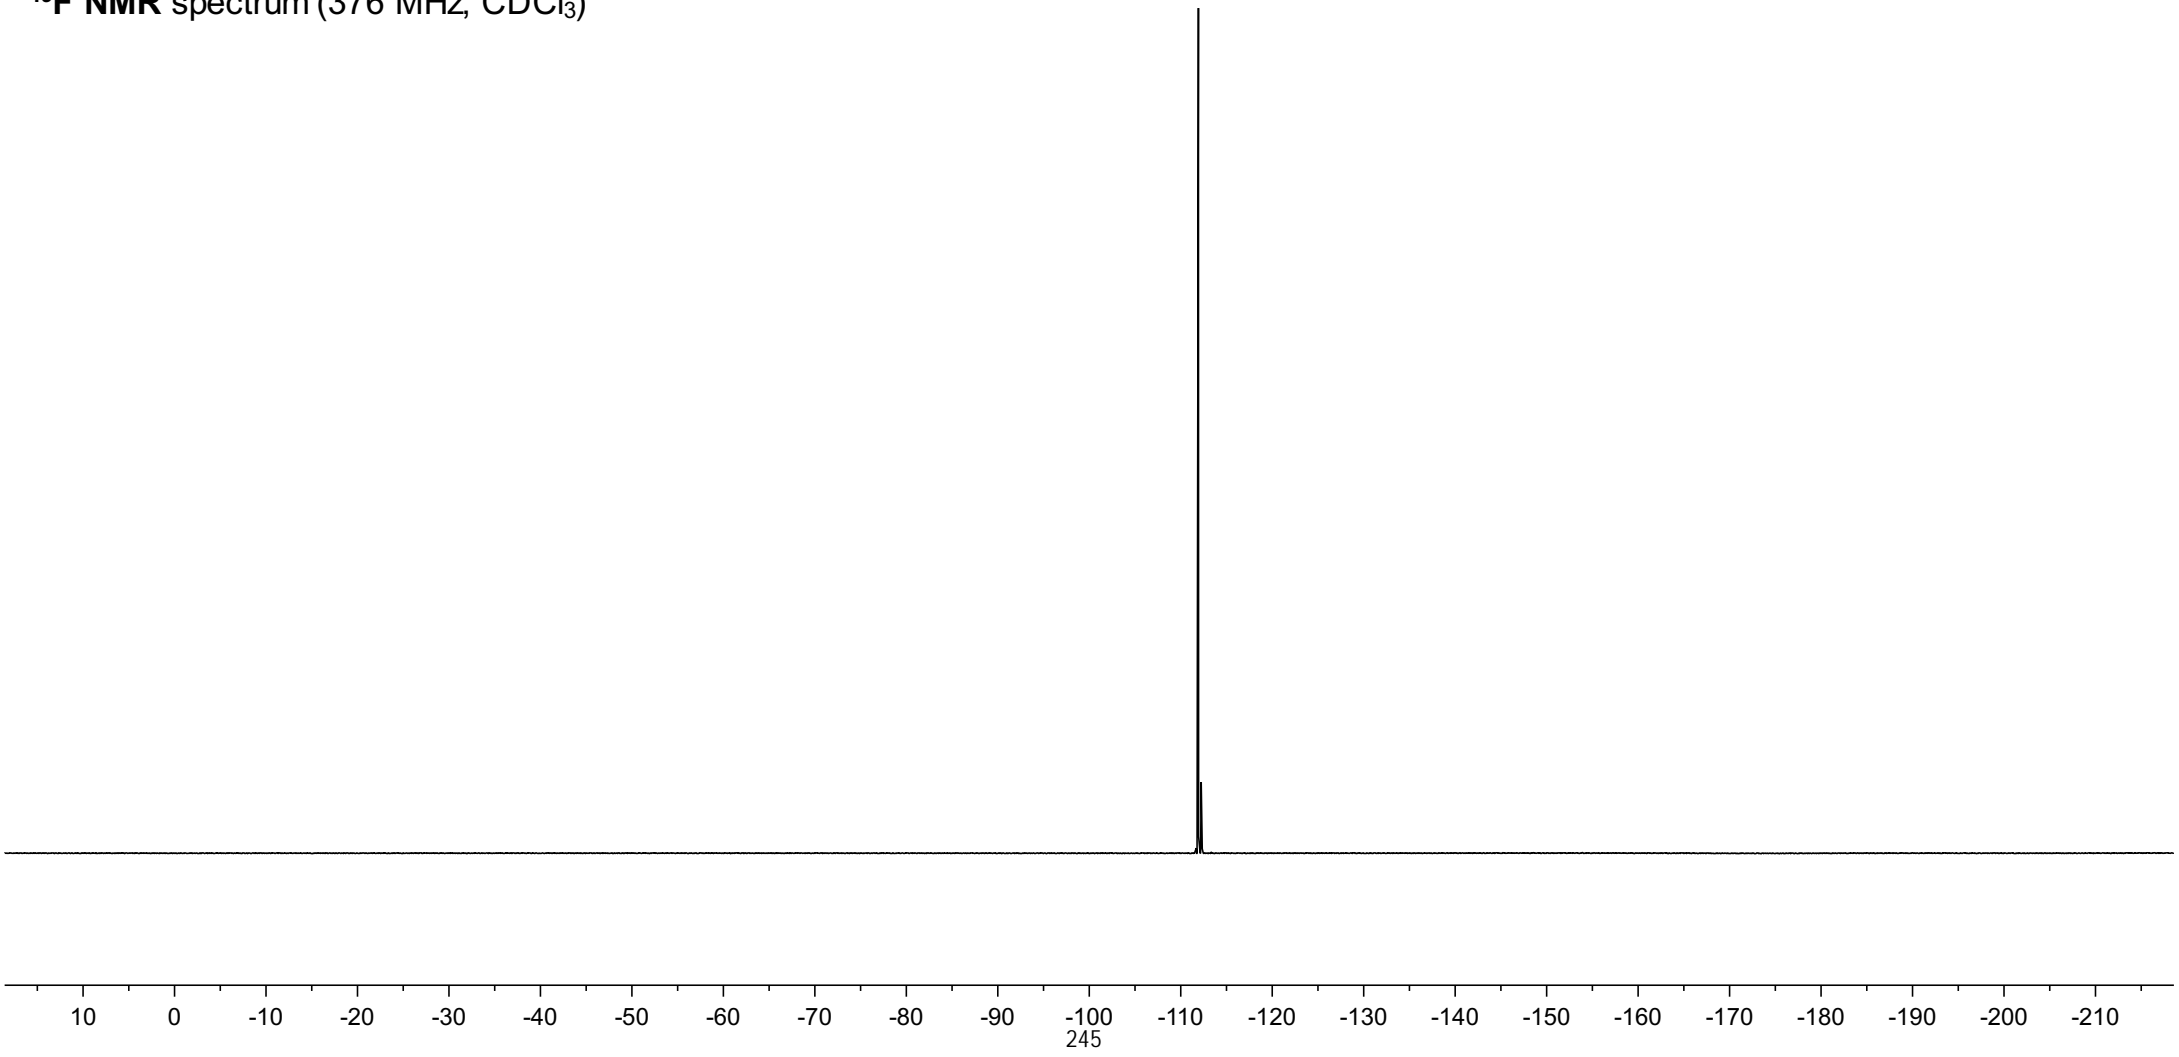

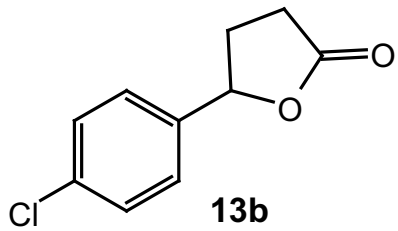

<sup>1</sup>H NMR spectrum (400 MHz, CDCl<sub>3</sub>)

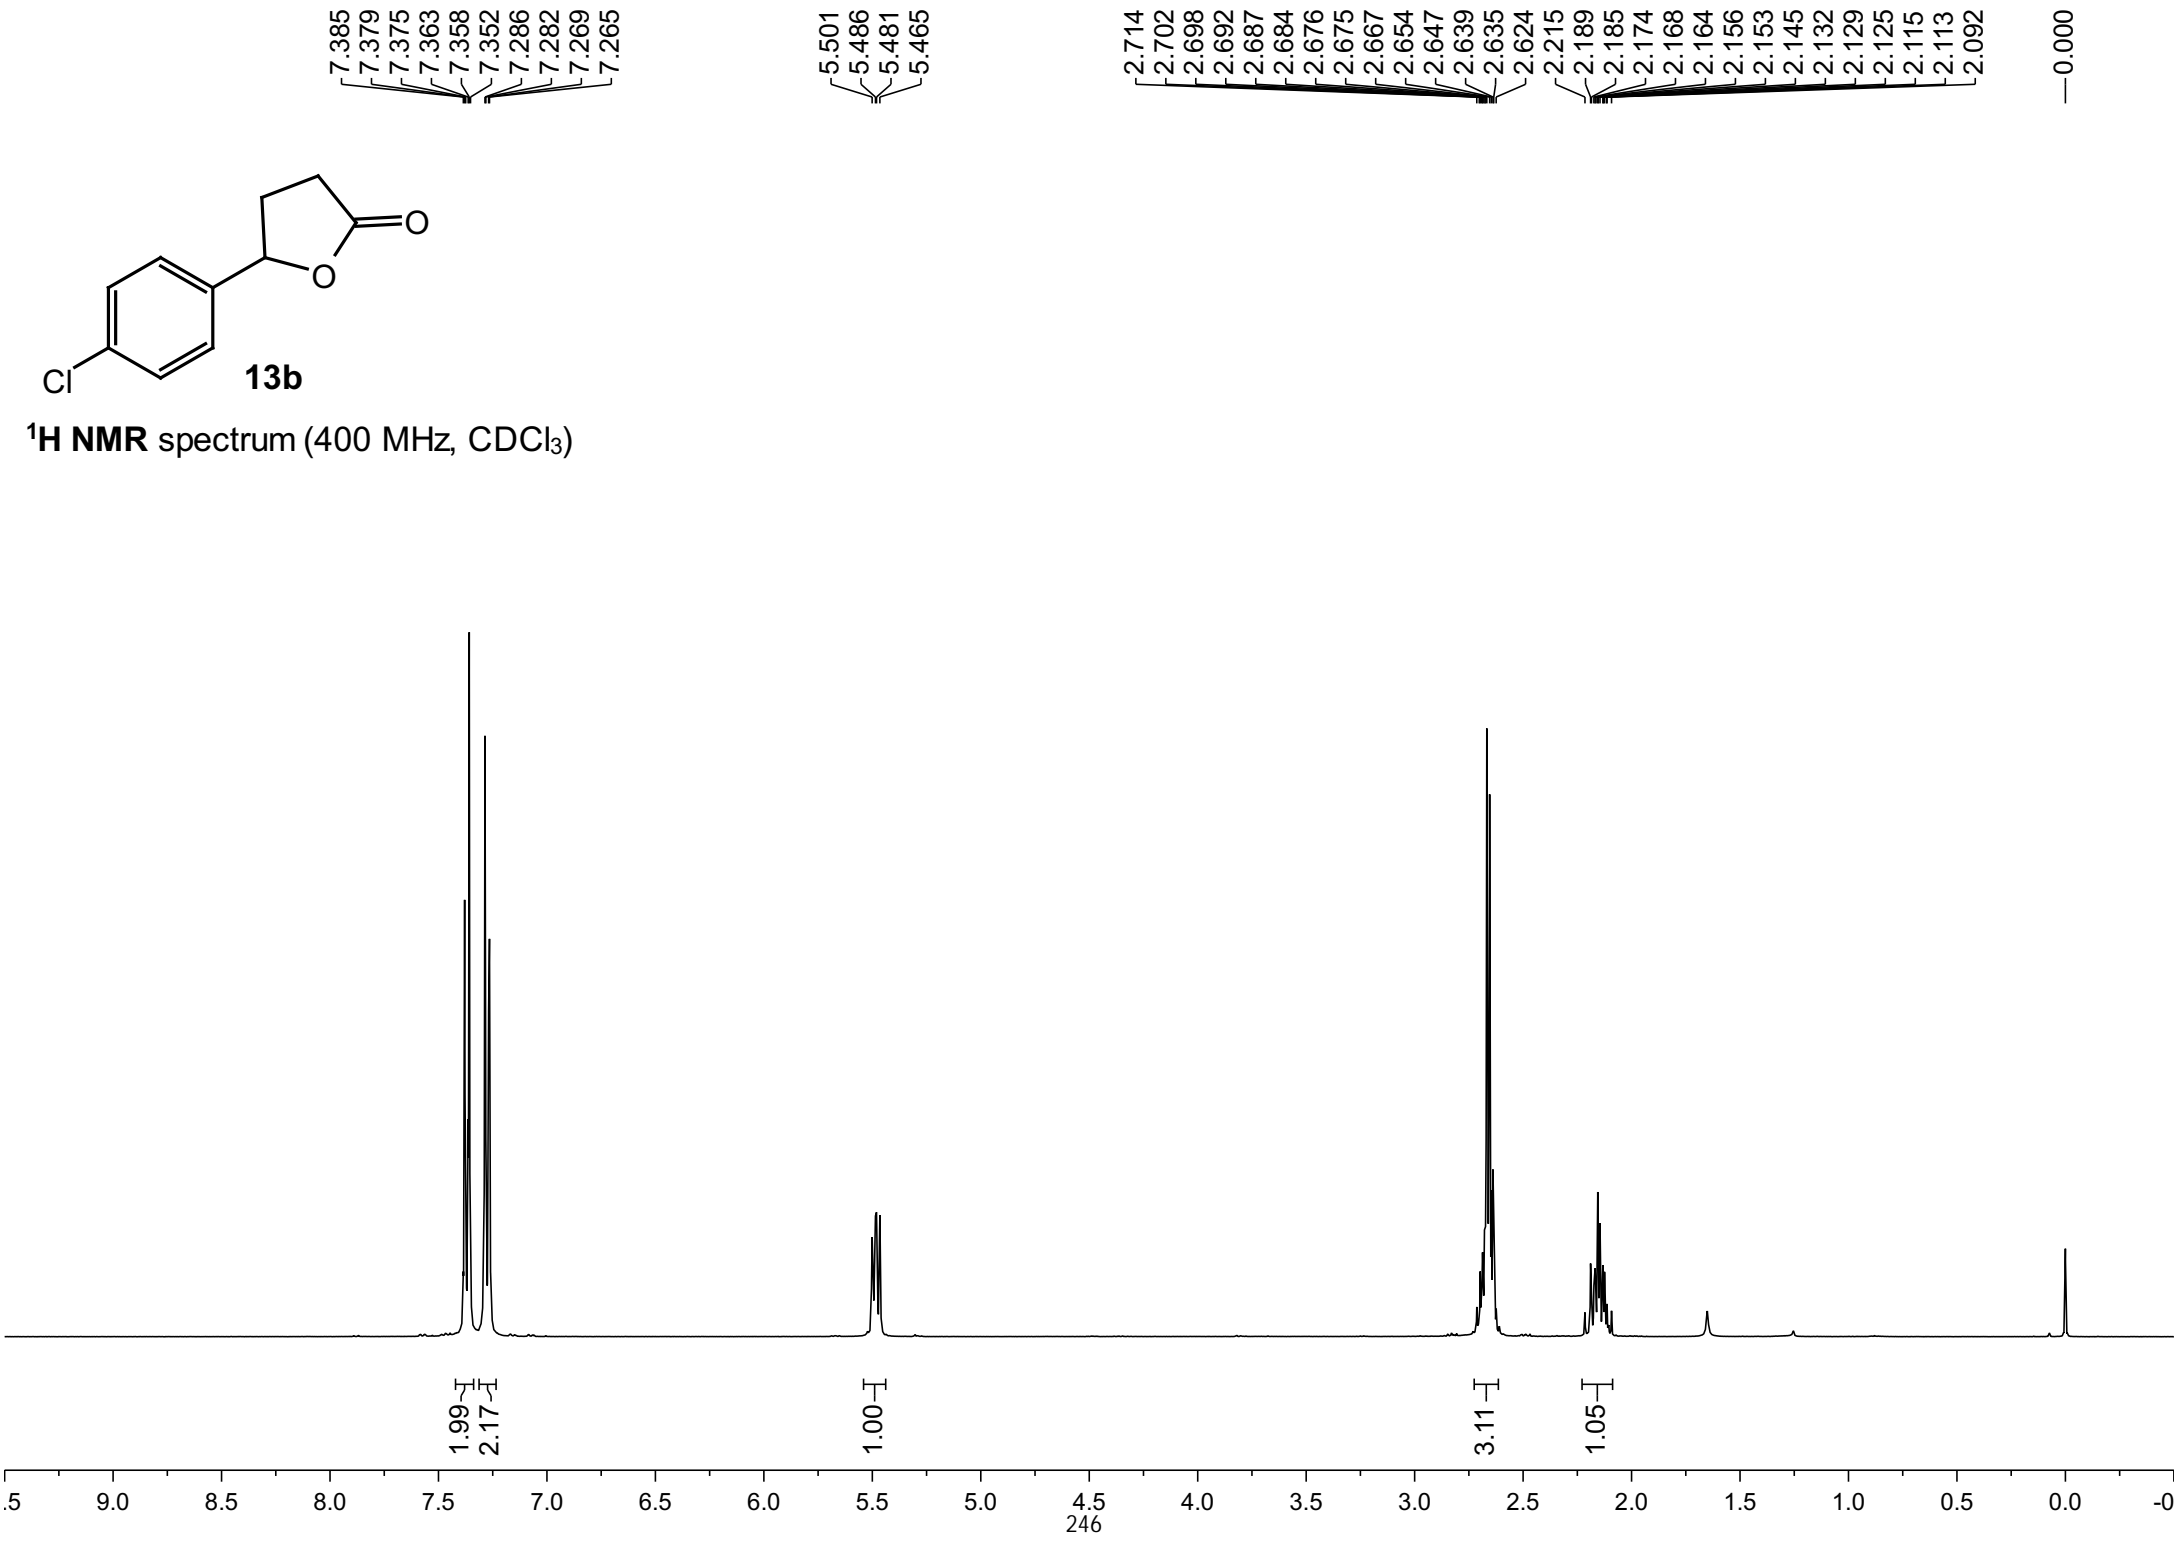

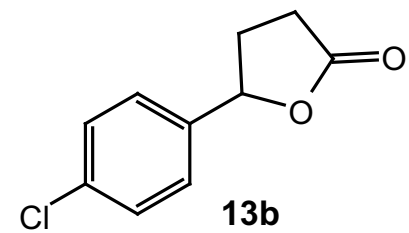

$^{13}\text{C}$  NMR spectrum (100 MHz,  $\text{CDCl}_3$ )

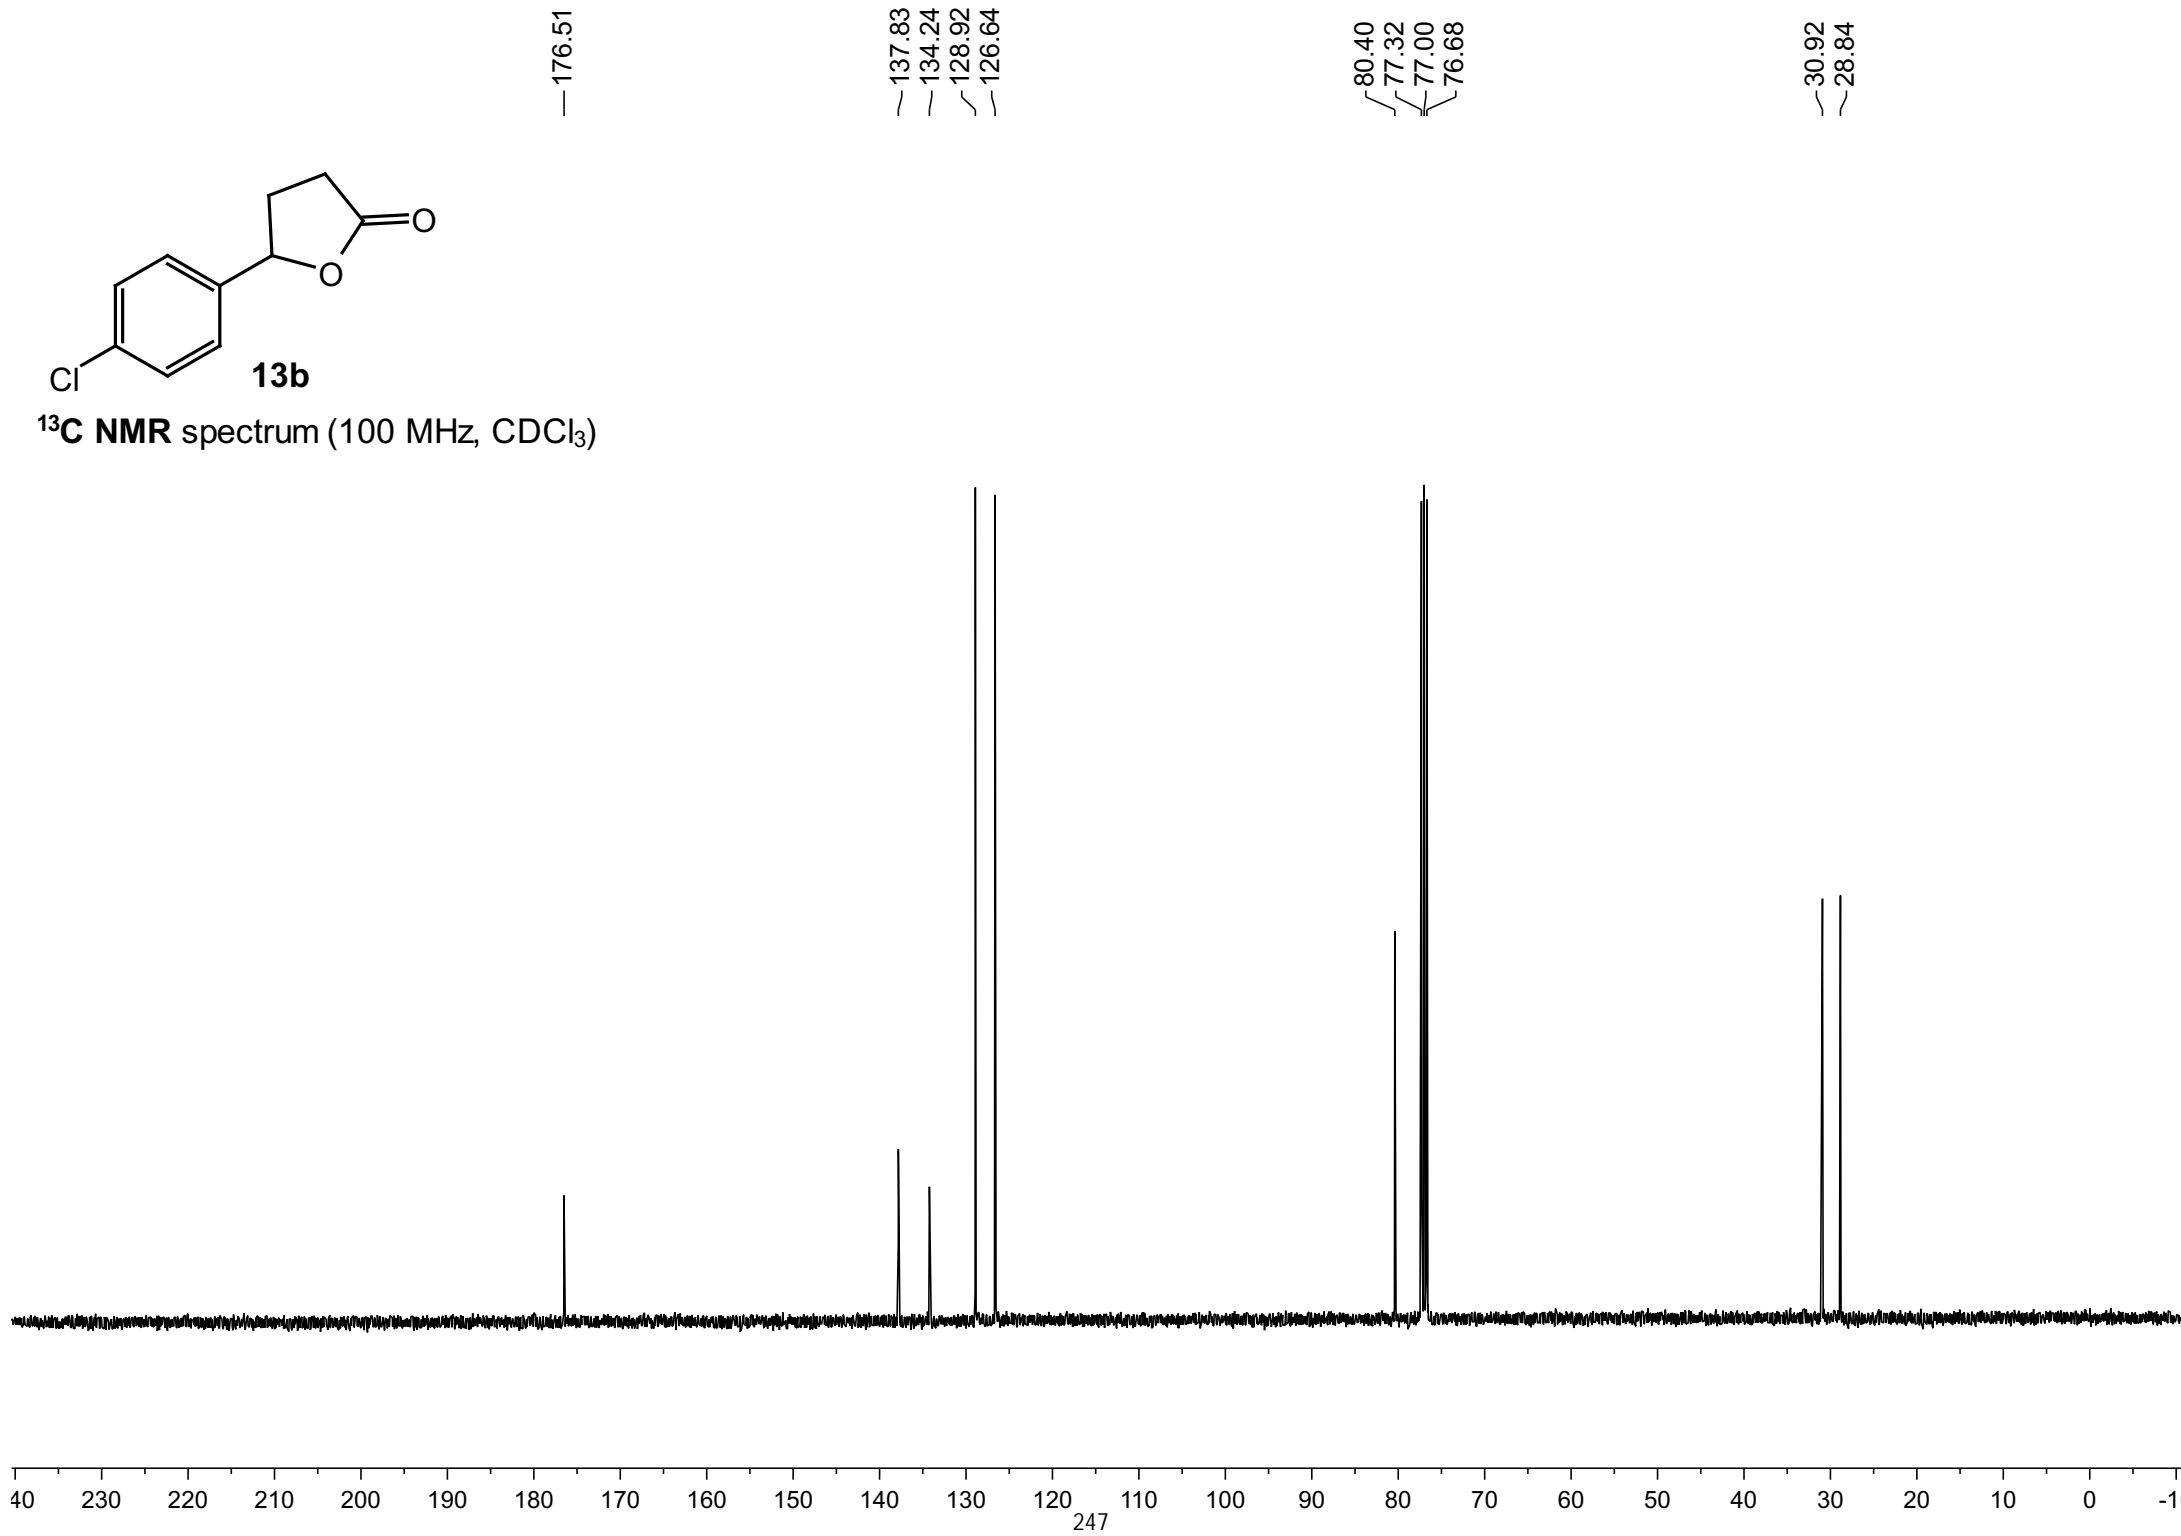

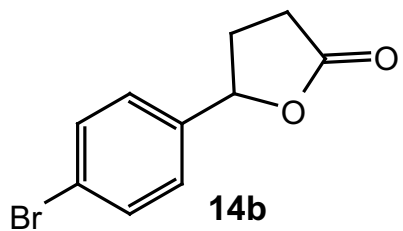

<sup>1</sup>H NMR spectrum (400 MHz, CDCl<sub>3</sub>)

7.539  
7.533  
7.530  
7.517  
7.512  
7.269  
7.226  
7.205

5.484  
5.468  
5.464  
5.448

2.714  
2.698  
2.691  
2.686  
2.678  
2.675  
2.666  
2.664  
2.655  
2.652  
2.647  
2.636  
2.633  
2.625  
2.210  
2.184  
2.180  
2.177  
2.166  
2.162  
2.158  
2.148  
2.140  
2.126  
2.119  
2.110  
2.107  
2.100  
2.087

—0.000

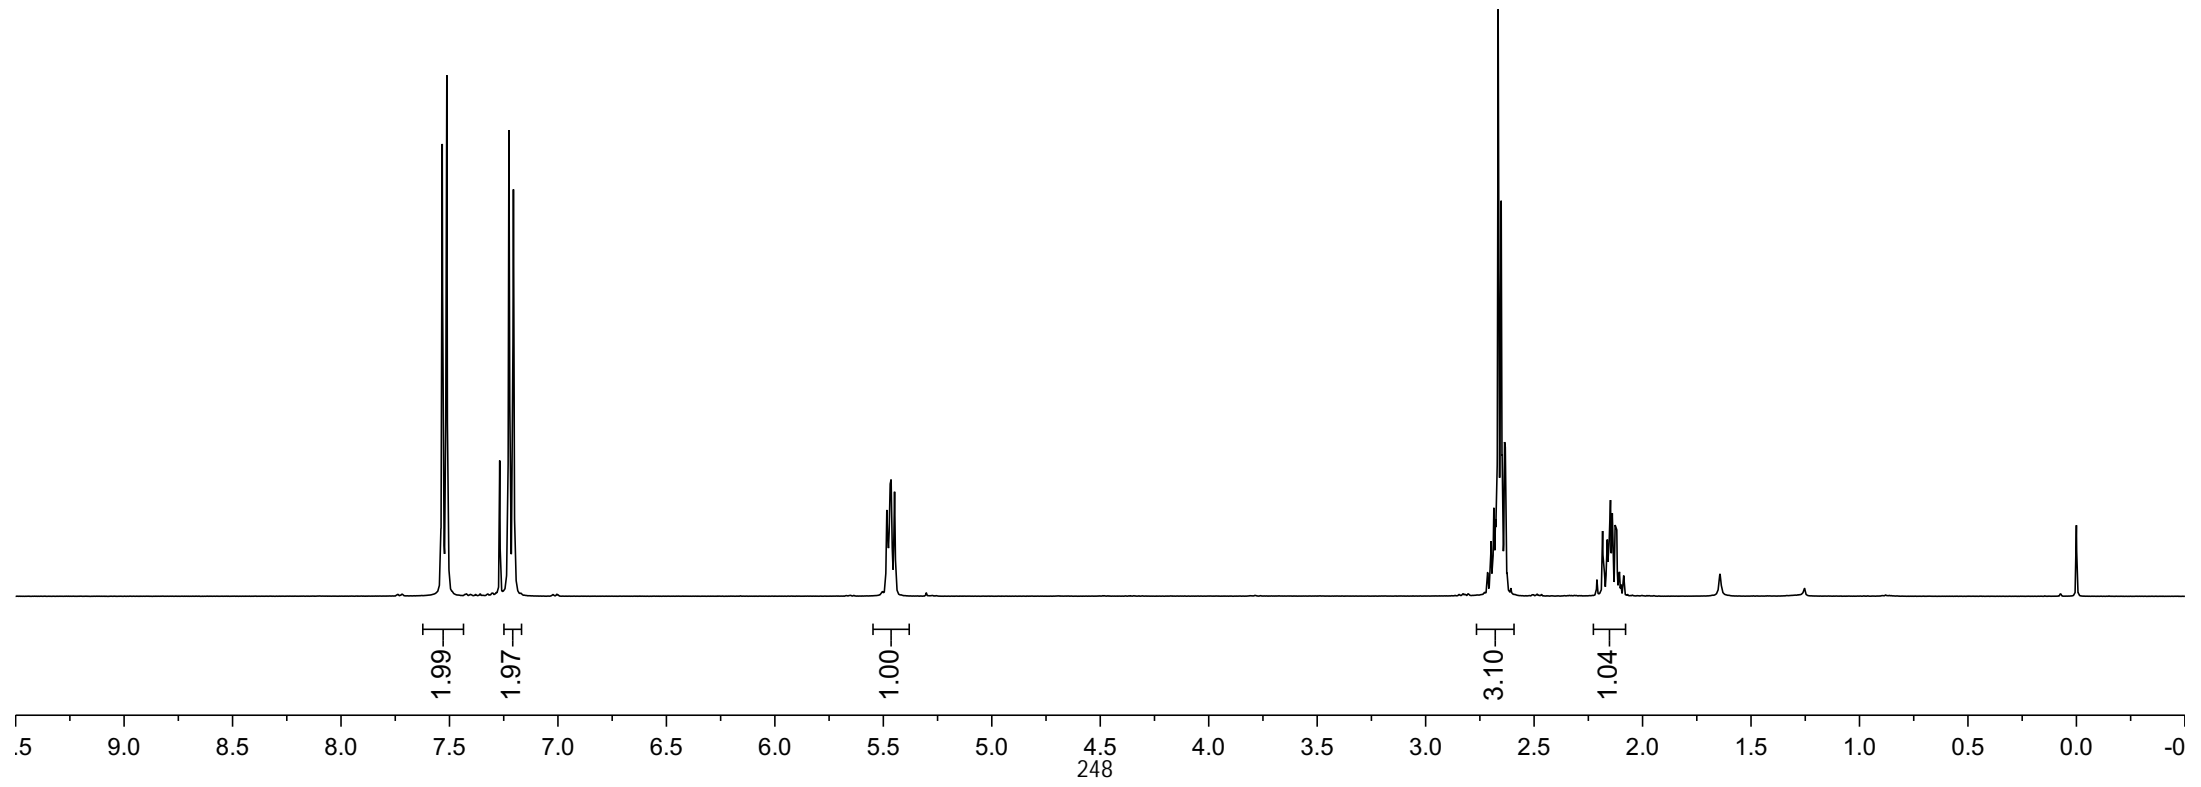

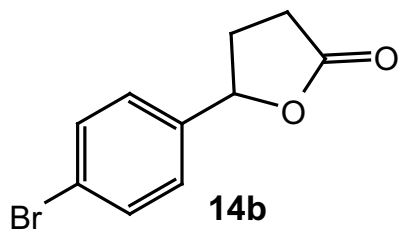

—176.49

138.37  
—131.87  
126.92  
122.34

80.40  
77.32  
77.00  
76.68

30.88  
28.82

<sup>13</sup>C NMR spectrum (100 MHz, CDCl<sub>3</sub>)

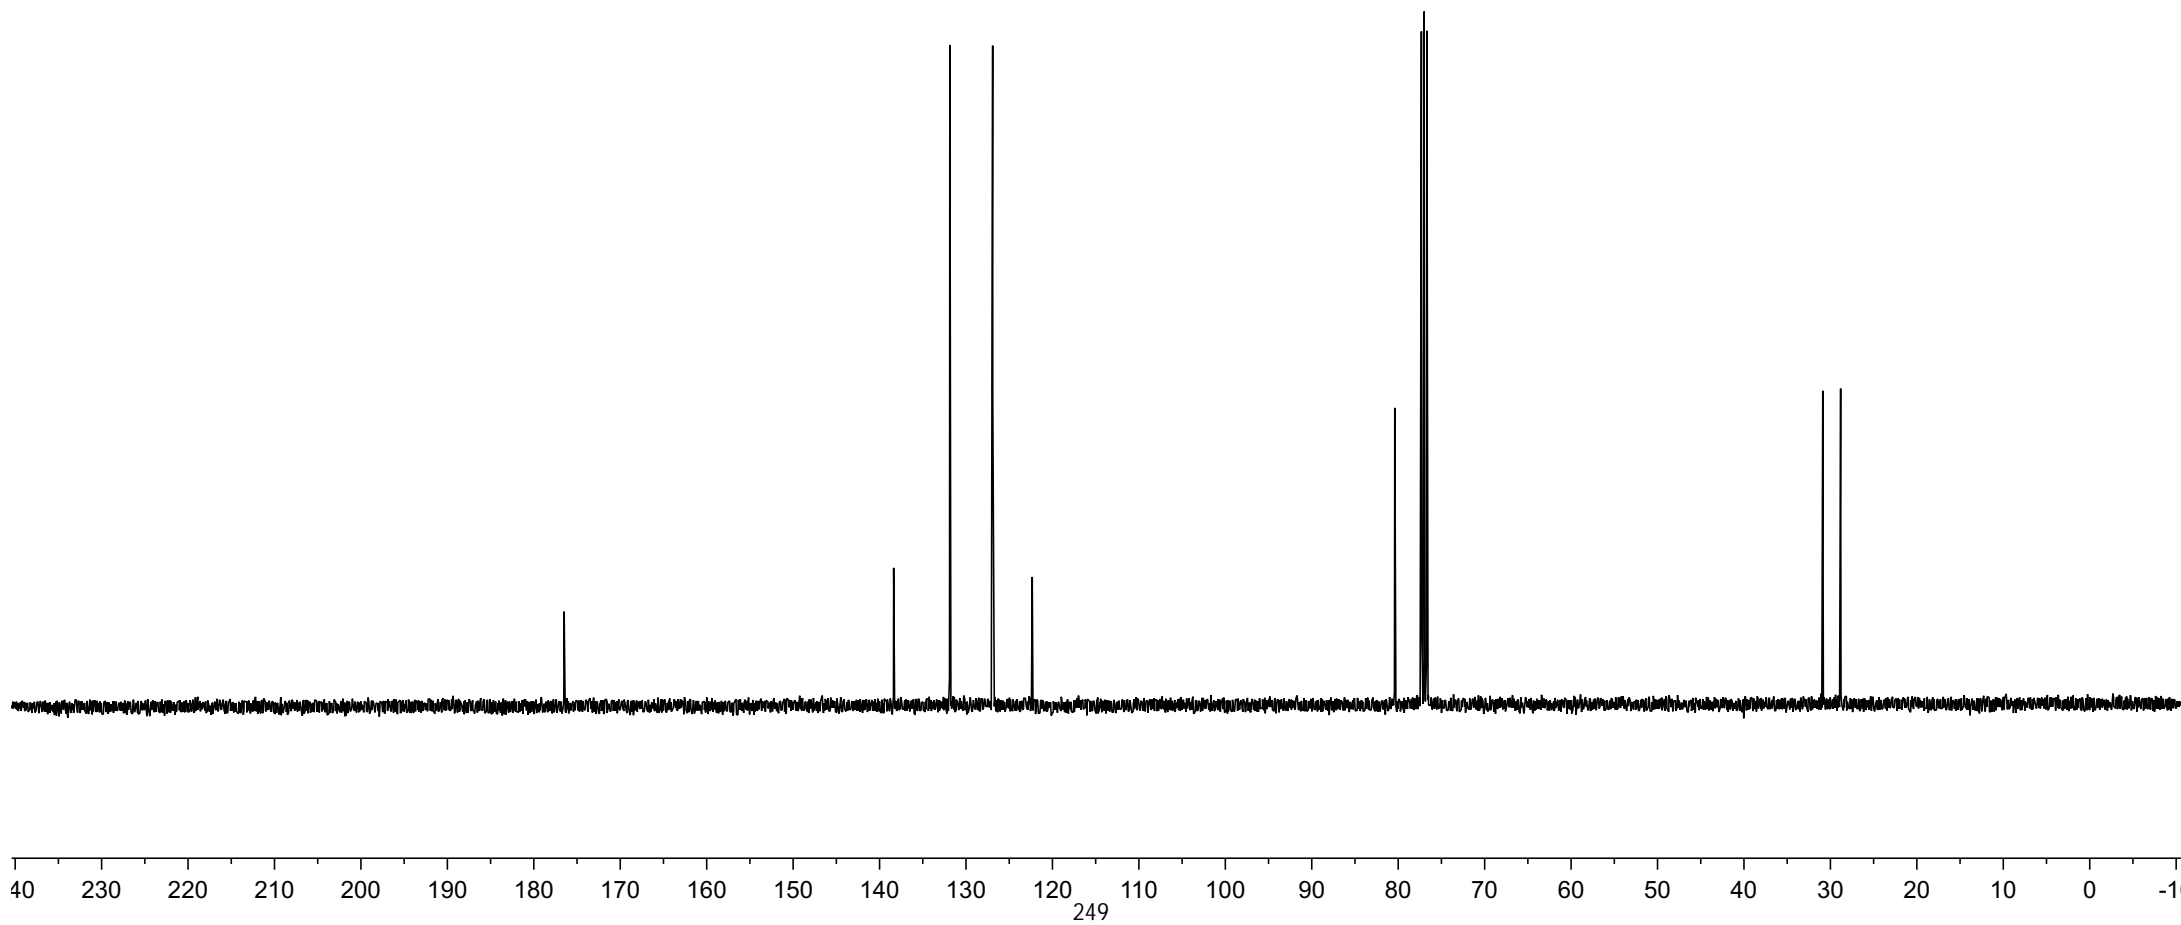

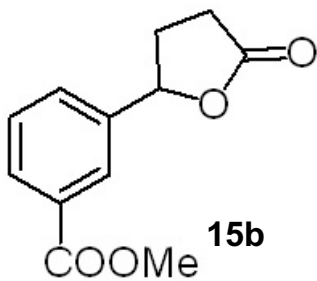

<sup>1</sup>H NMR spectrum (600 MHz, CDCl<sub>3</sub>)

8.027  
8.025  
8.022  
8.013  
8.011  
8.010  
7.559  
7.546  
7.493  
7.480  
7.467  
7.284

5.568  
5.558  
5.555  
5.544

3.929  
2.745  
2.737  
2.734  
2.725  
2.723  
2.713  
2.702  
2.696  
2.694  
2.687  
2.682  
2.676  
2.670  
2.668  
2.648  
2.230  
2.219  
2.214  
2.211  
2.205  
2.201  
2.196  
2.187  
2.185  
2.182  
2.178  
2.167

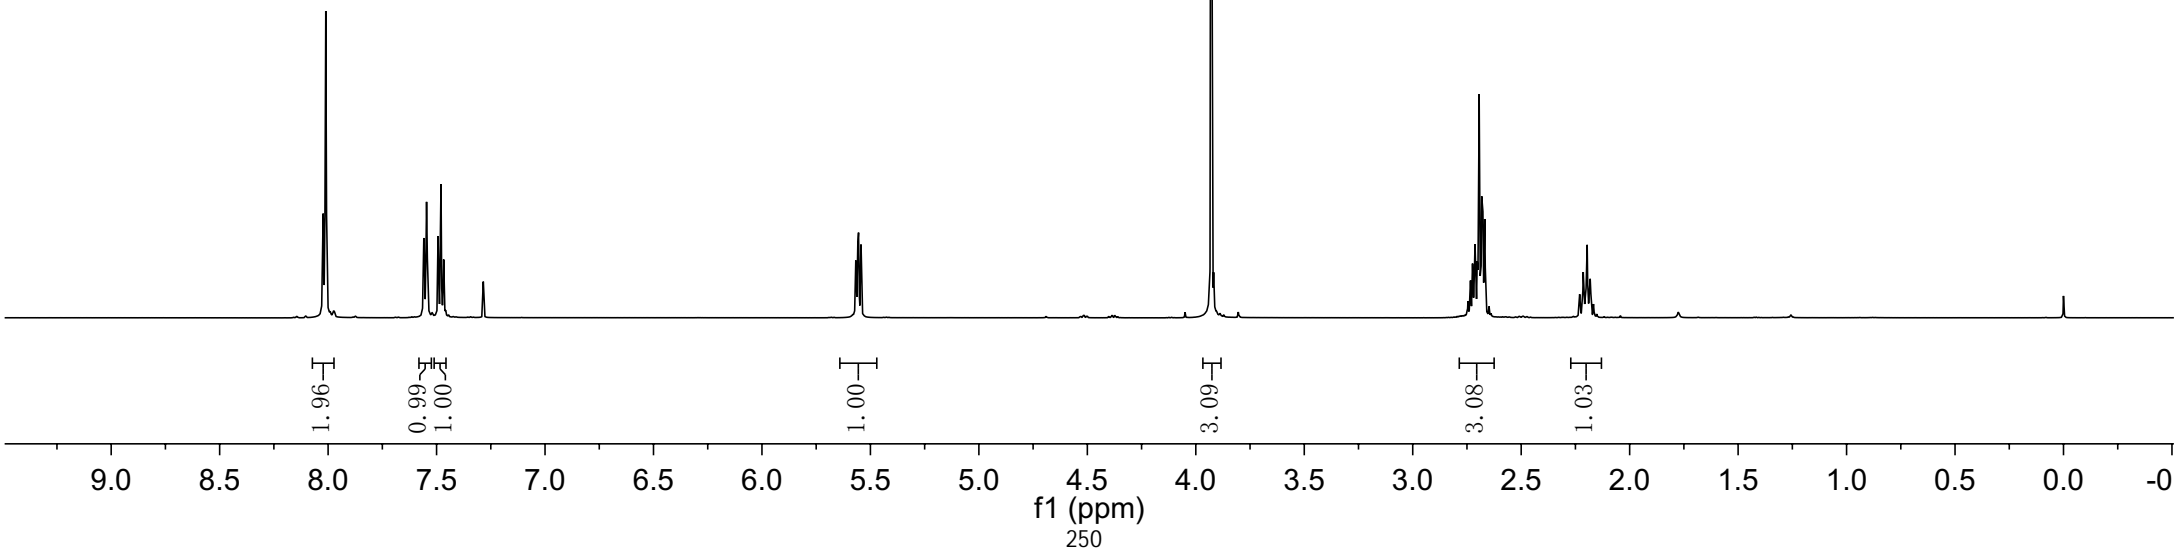

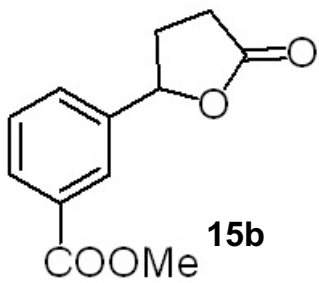

<sup>13</sup>C NMR spectrum (150 MHz, CDCl<sub>3</sub>)

—176.50

—166.48

—139.82

130.66

129.66

129.53

128.88

126.35

80.51

77.21

77.00

76.79

—52.19

~30.87

~28.83

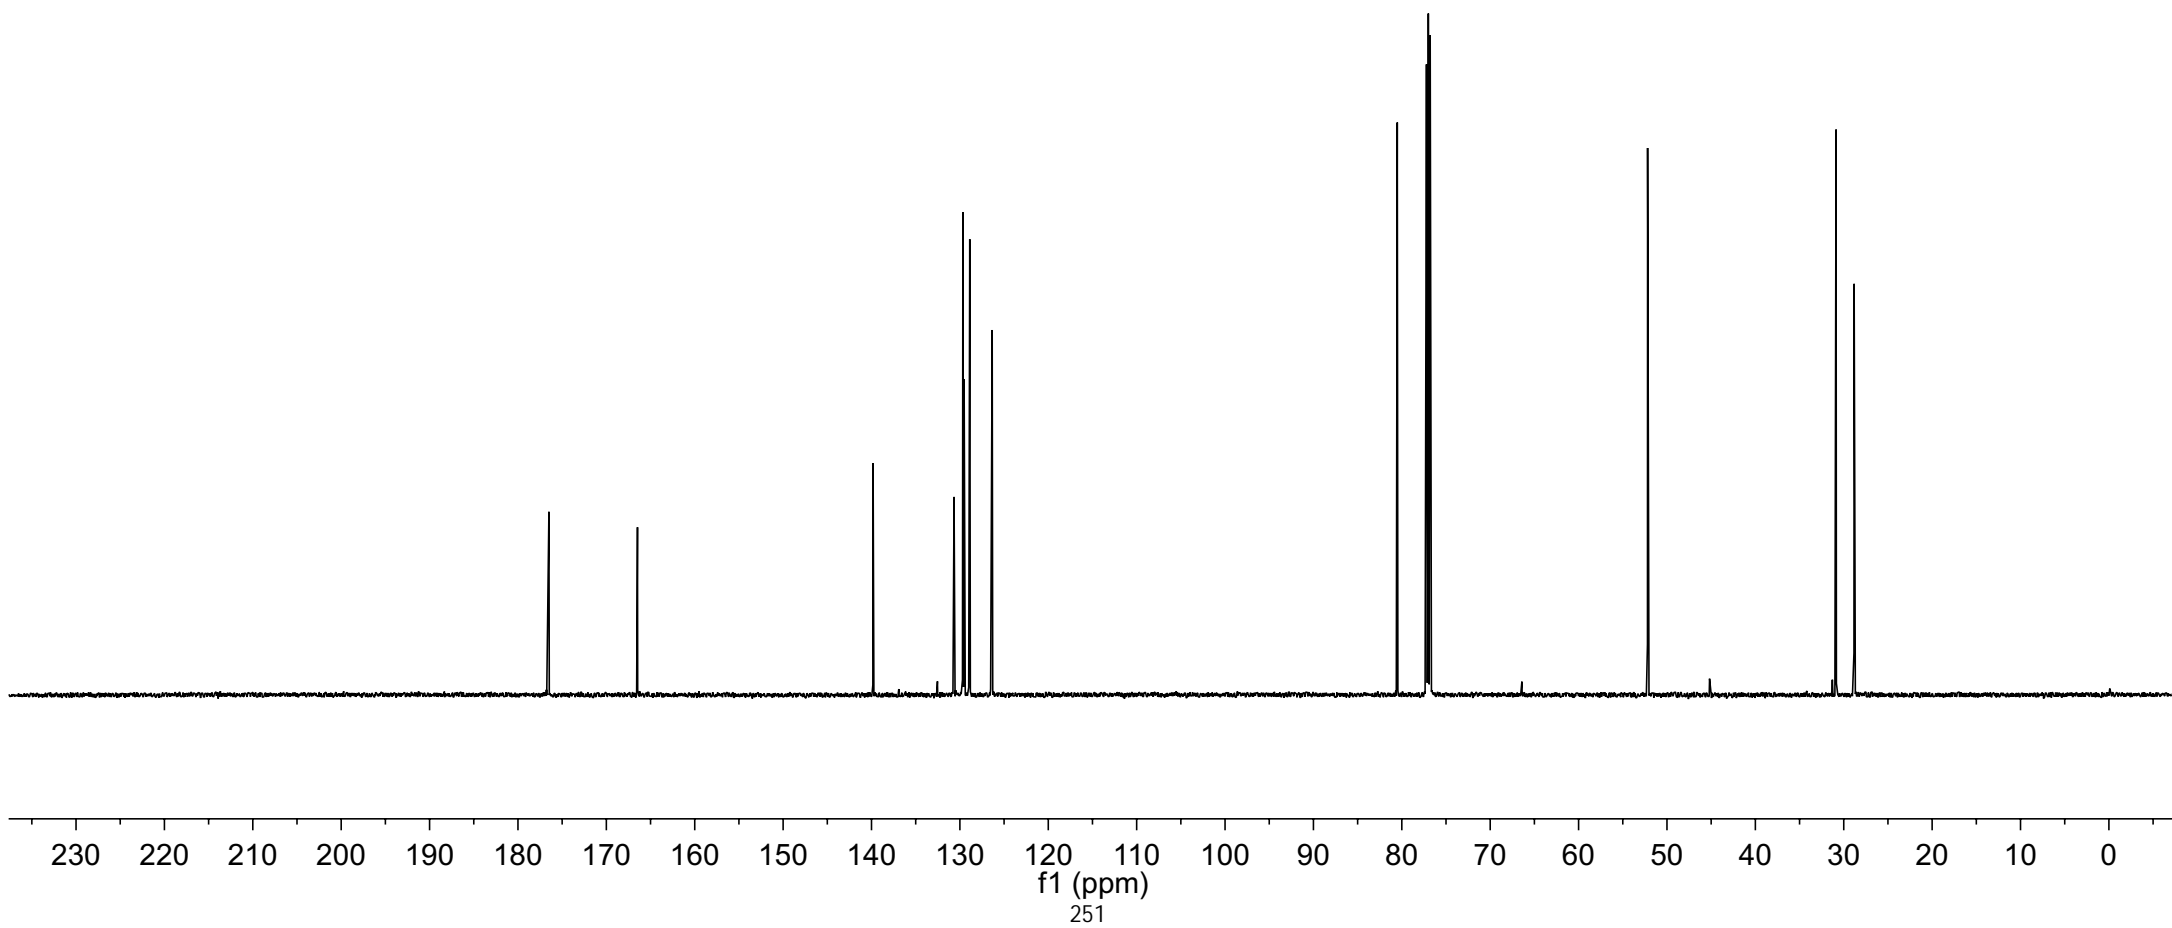



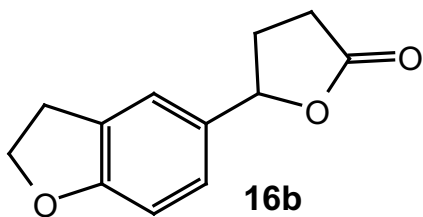

<sup>1</sup>H NMR spectrum (600 MHz, CDCl<sub>3</sub>)

7.265  
7.192  
7.072  
7.070  
7.058  
7.057  
6.780  
6.766

5.448  
5.437  
5.434  
5.423

4.603  
4.589  
4.574

3.226  
3.212  
3.197  
2.688  
2.668  
2.659  
2.655  
2.652  
2.648  
2.645  
2.640  
2.632  
2.627  
2.618  
2.615  
2.611  
2.602  
2.591  
2.580  
2.569  
2.232  
2.224  
2.213  
2.207  
2.198  
2.193  
2.188  
2.183  
2.178  
2.162  
-0.000

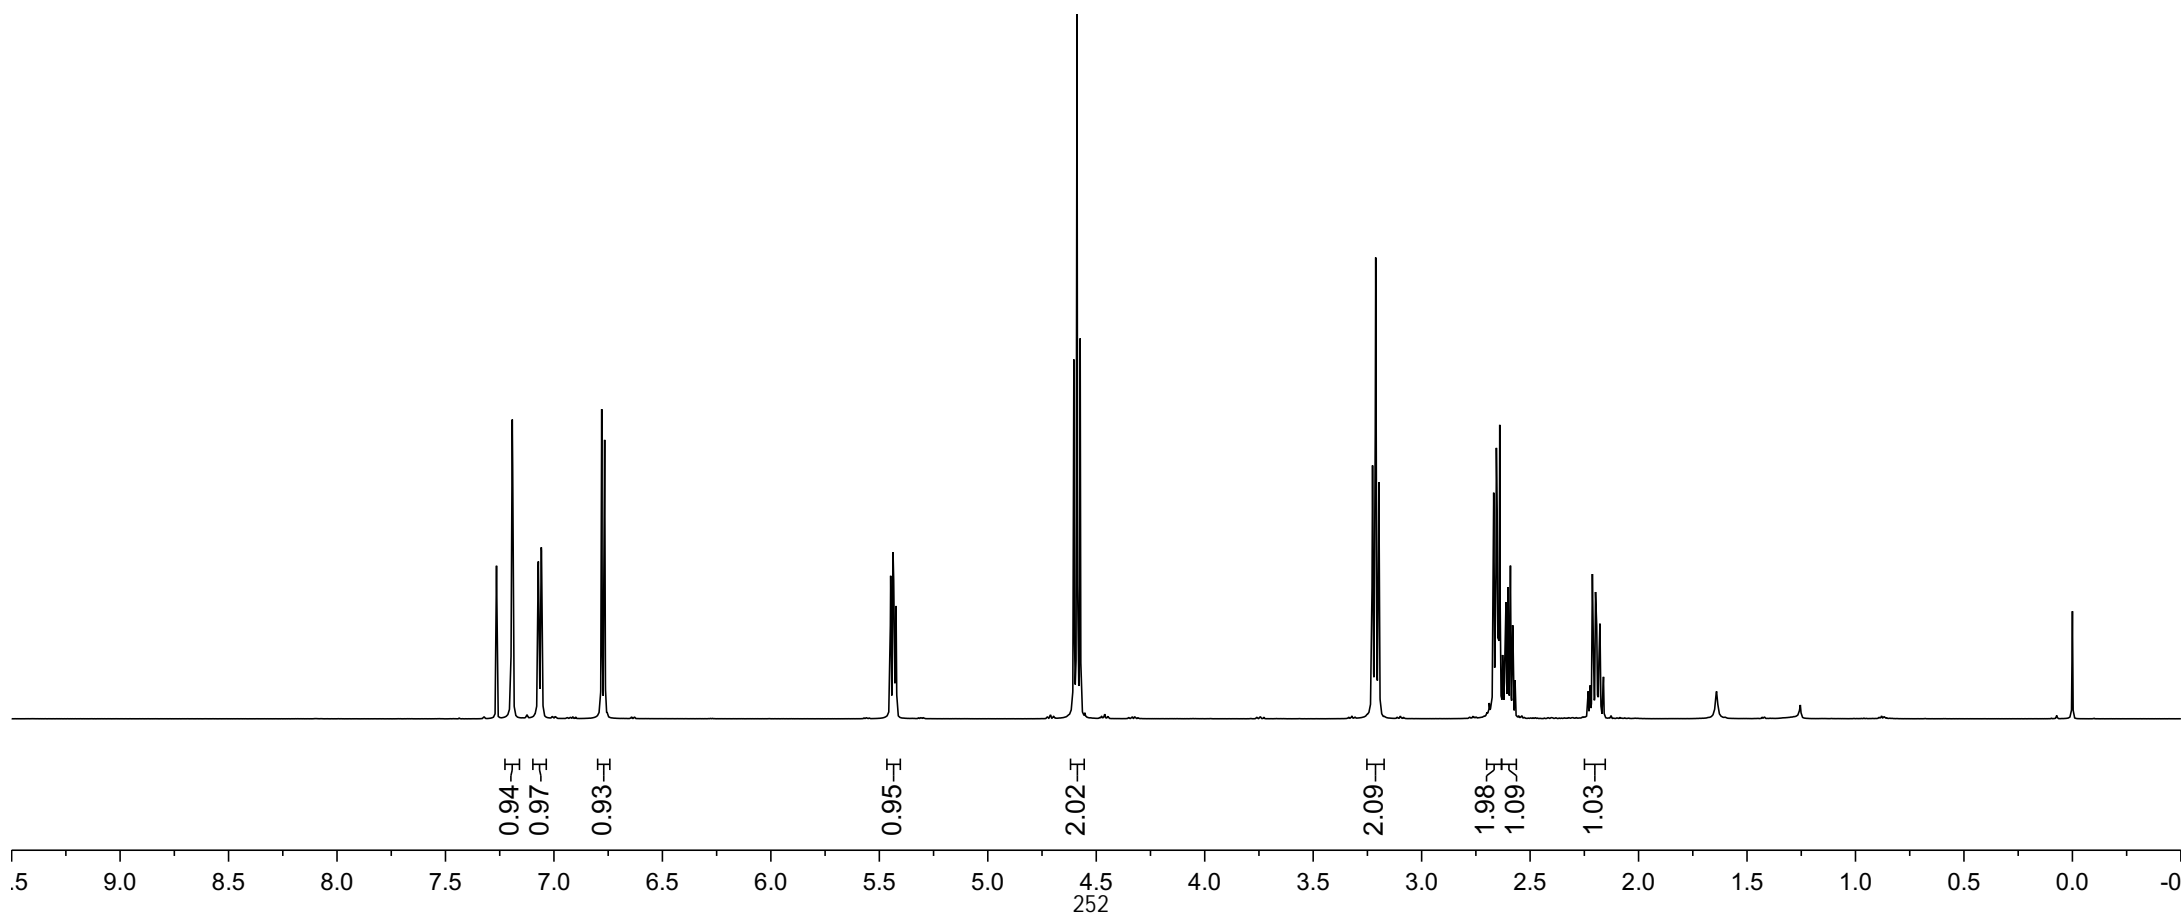

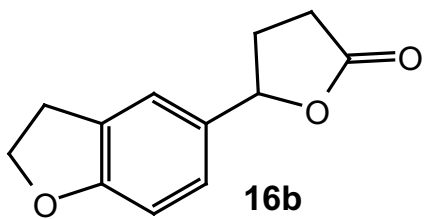

<sup>13</sup>C NMR spectrum (150 MHz, CDCl<sub>3</sub>)

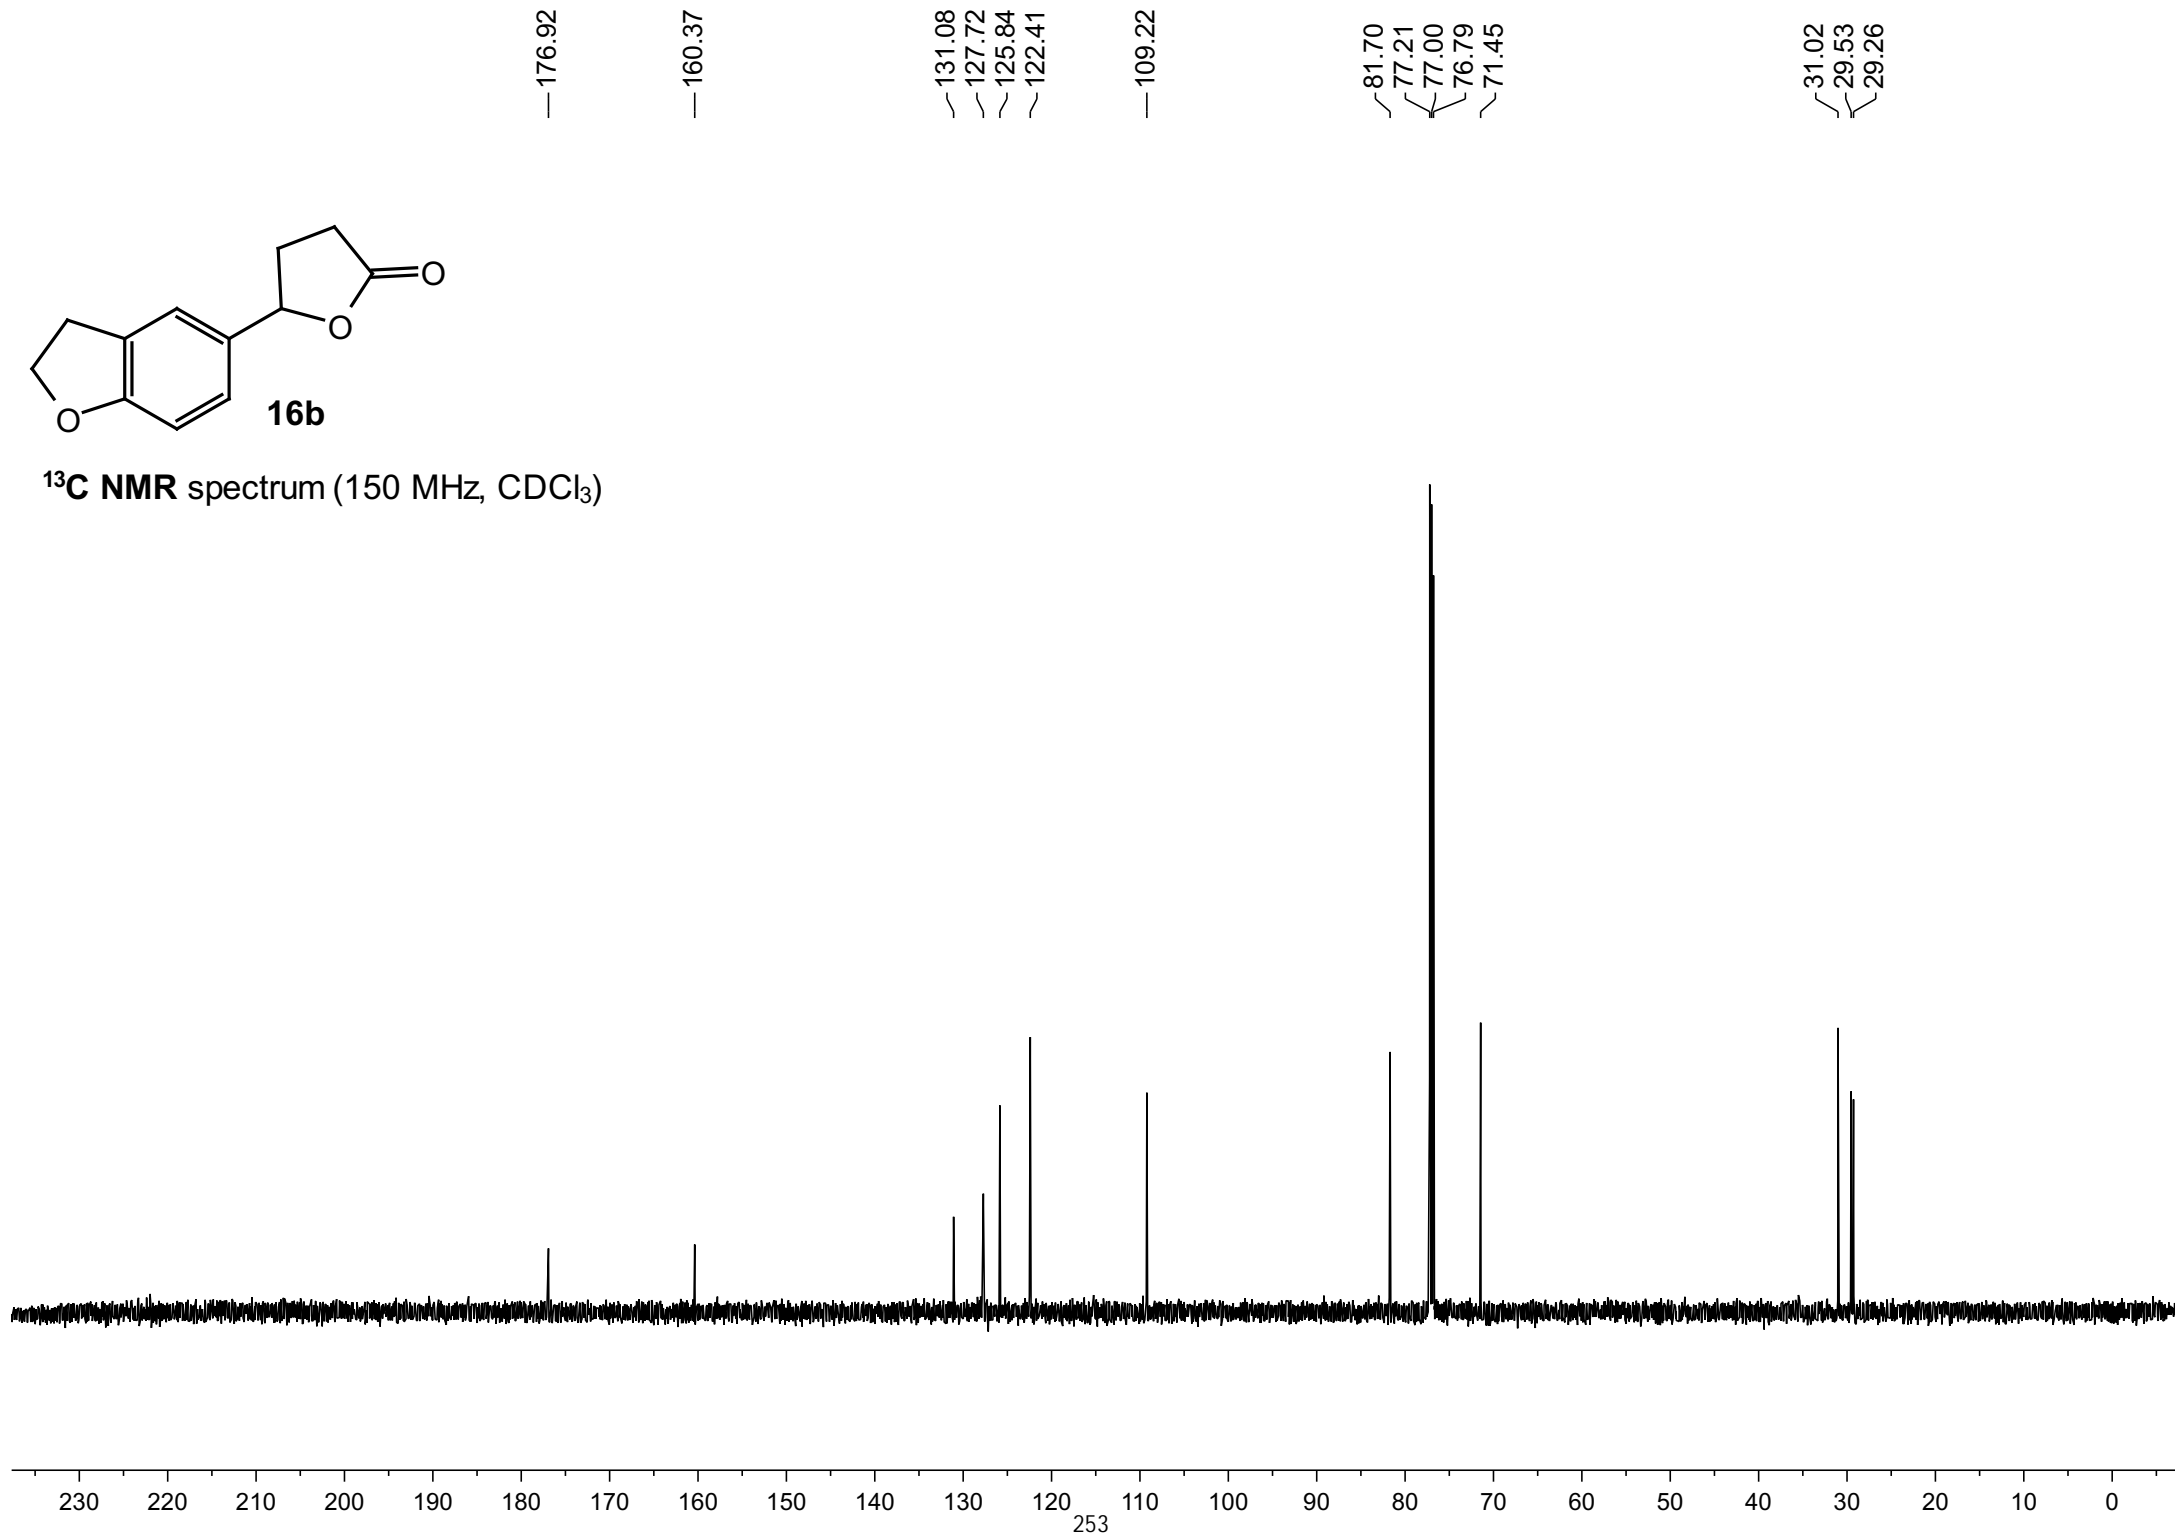

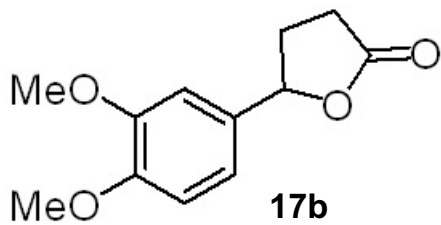

<sup>1</sup>H NMR spectrum (600 MHz, CDCl<sub>3</sub>)

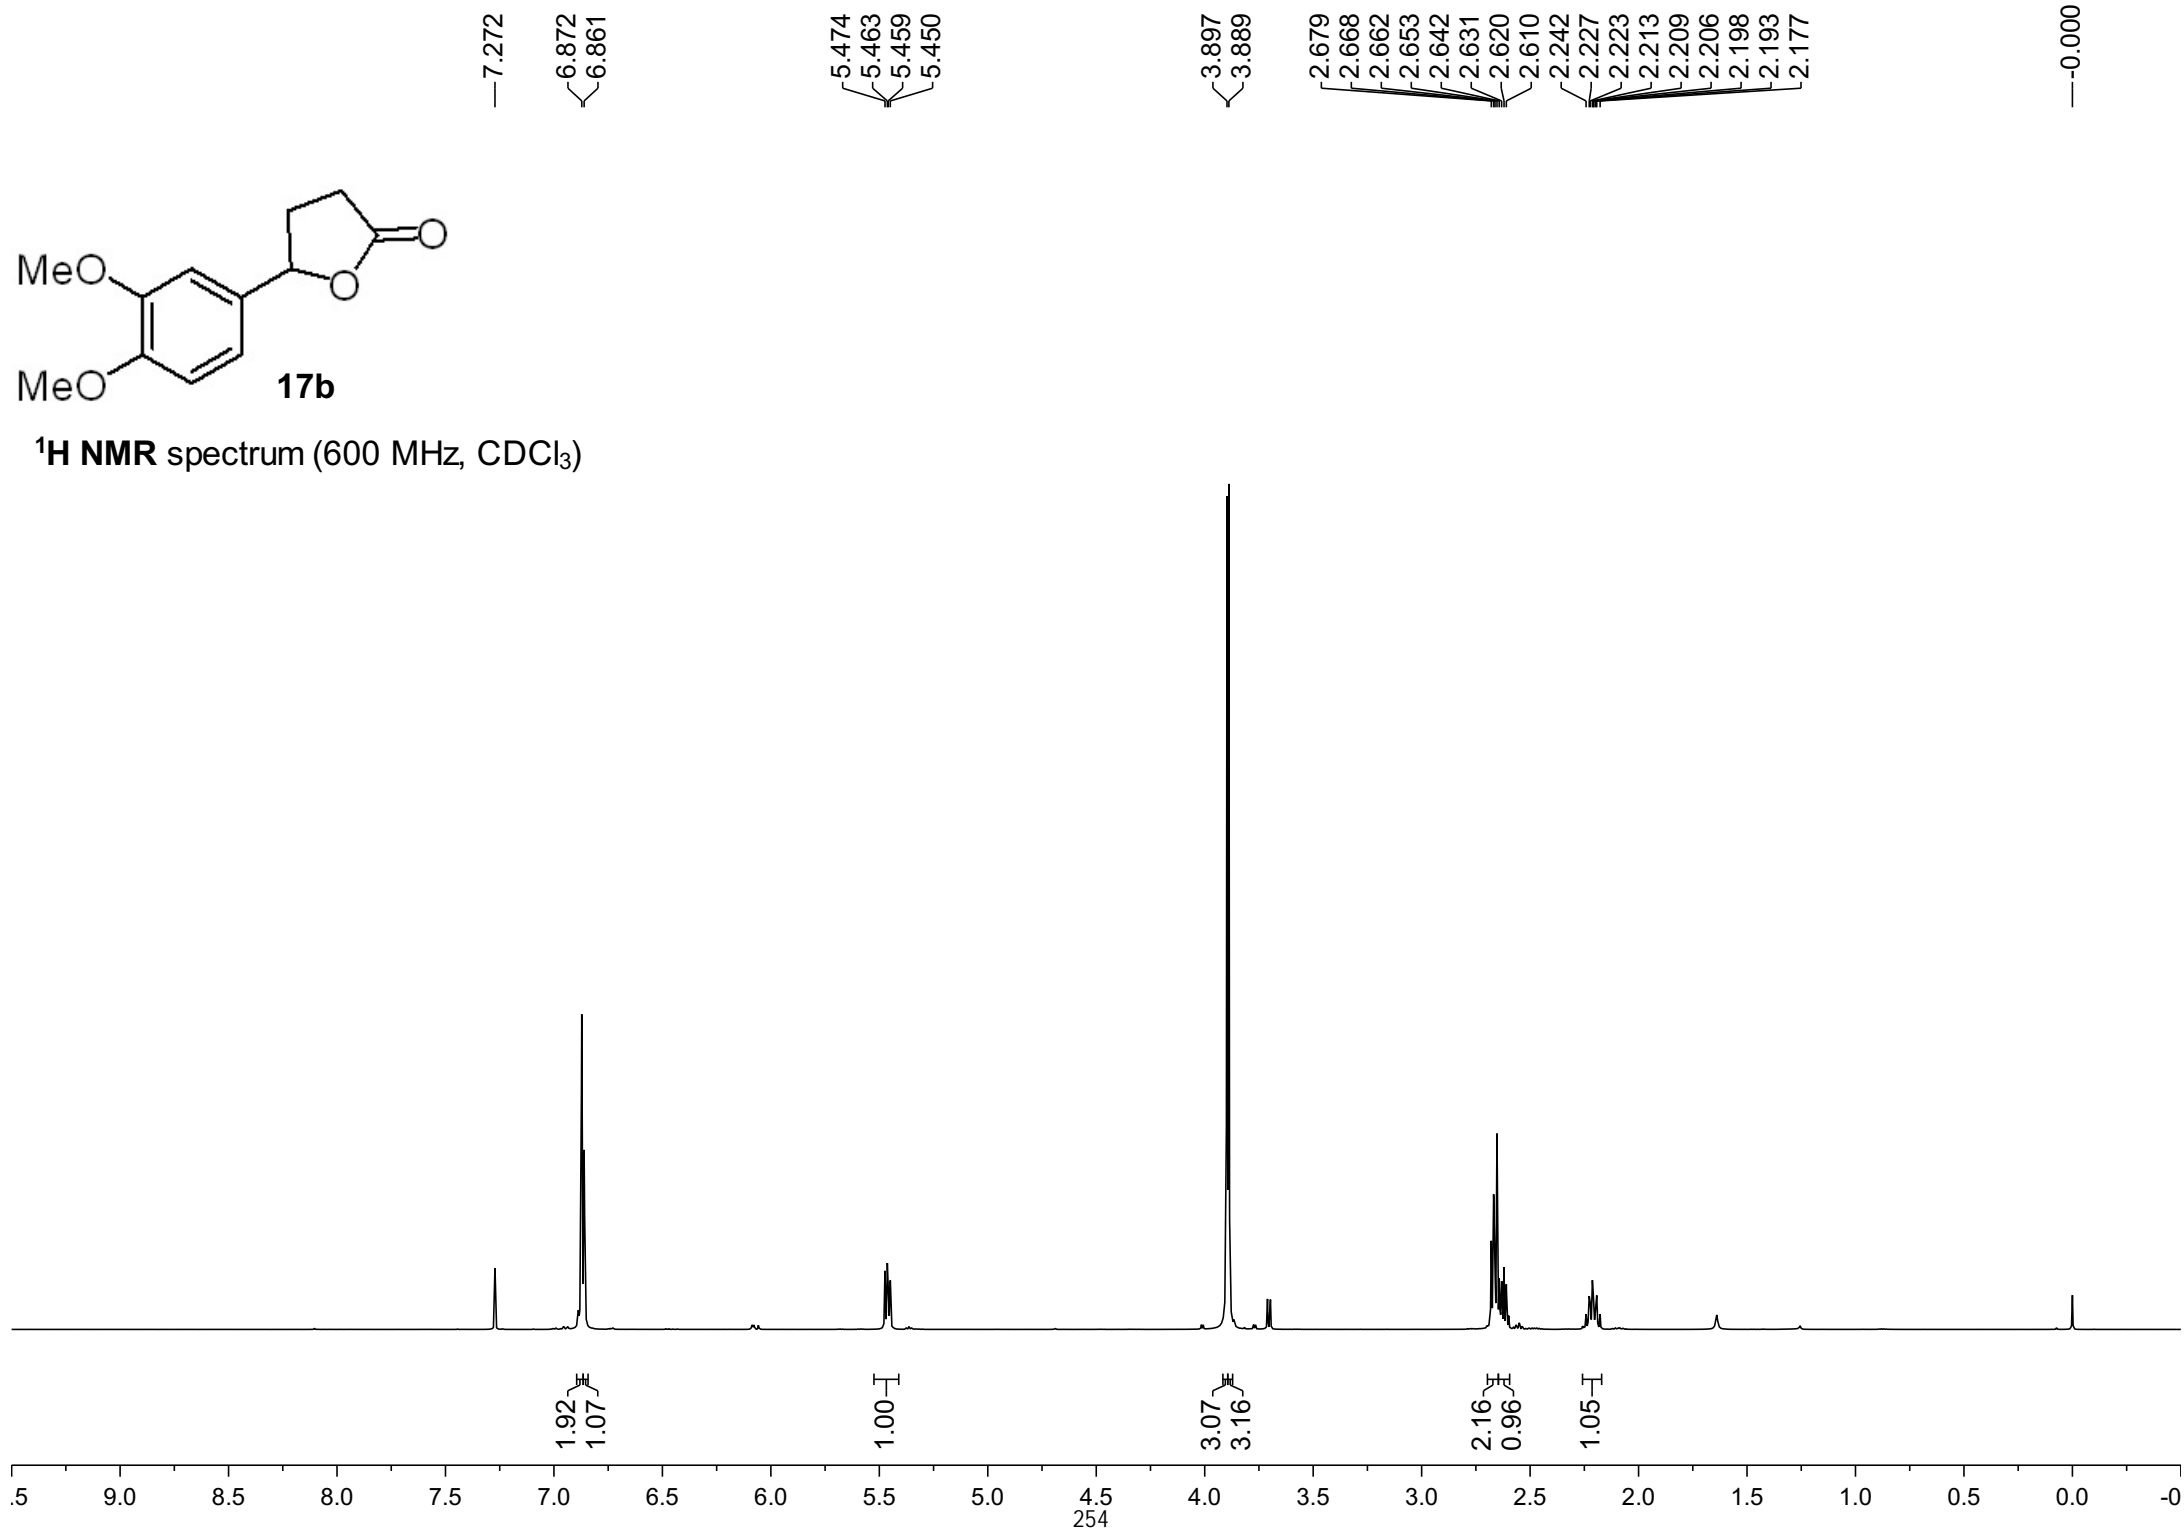

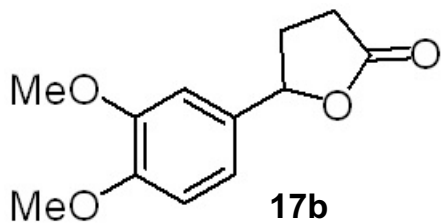

<sup>13</sup>C NMR spectrum (150 MHz, CDCl<sub>3</sub>)

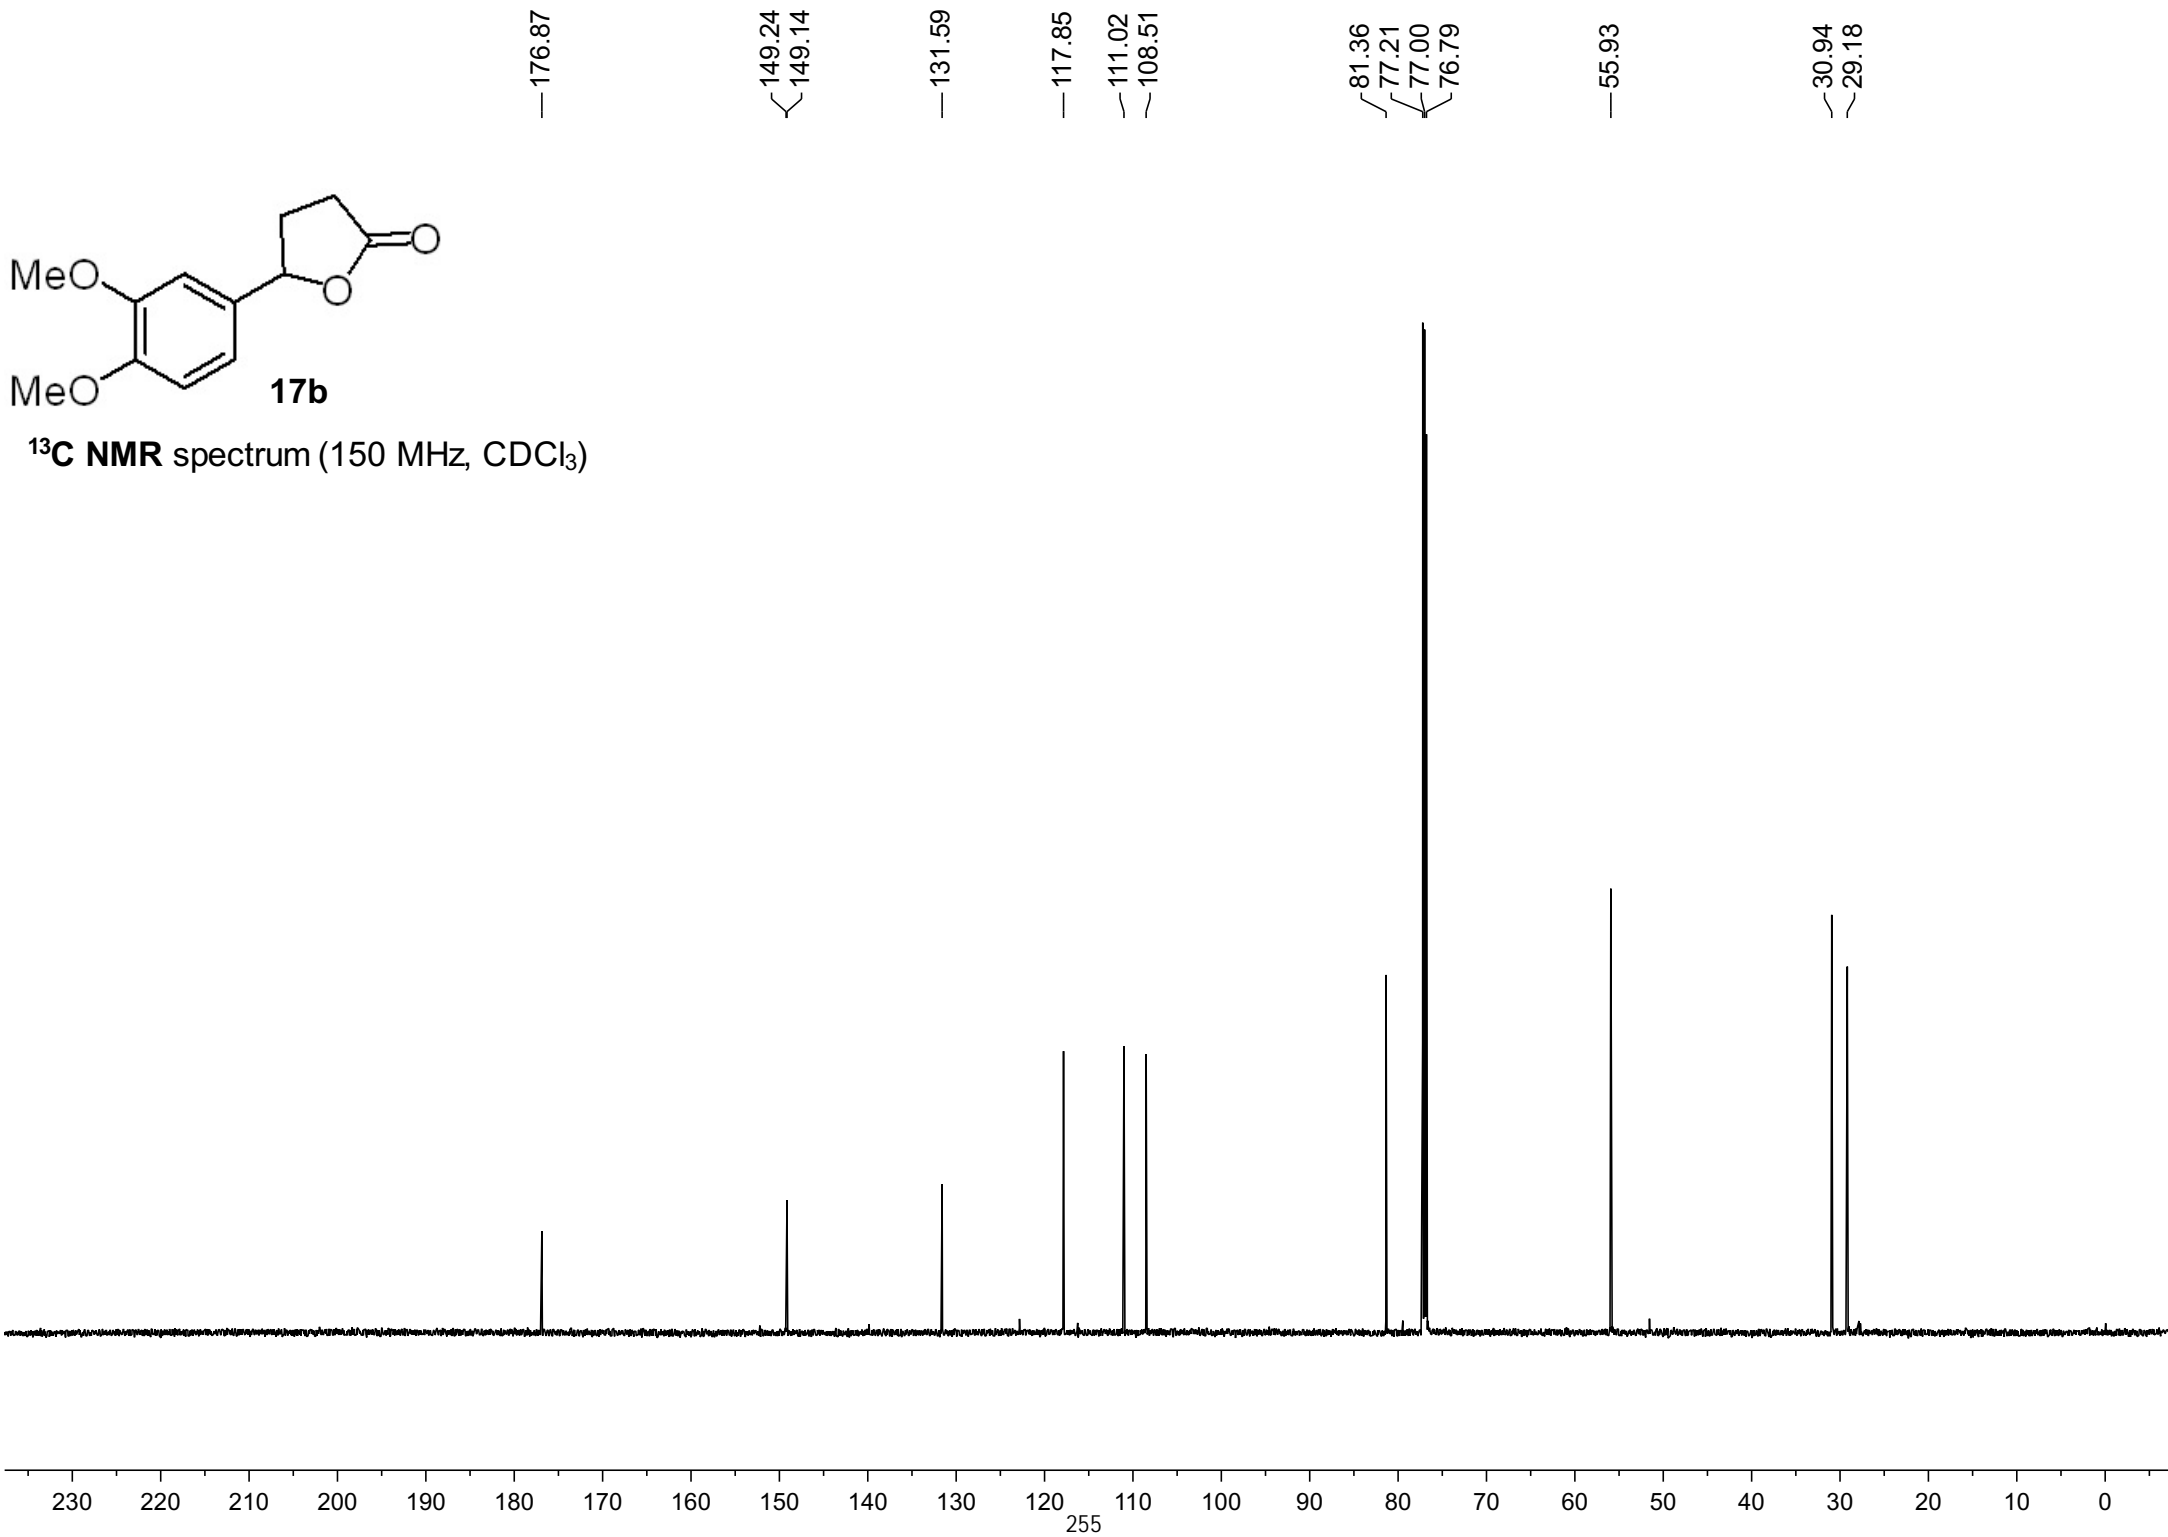

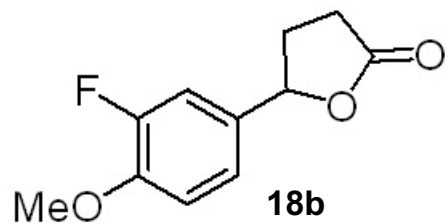

<sup>1</sup>H NMR spectrum (400 MHz, CDCl<sub>3</sub>)

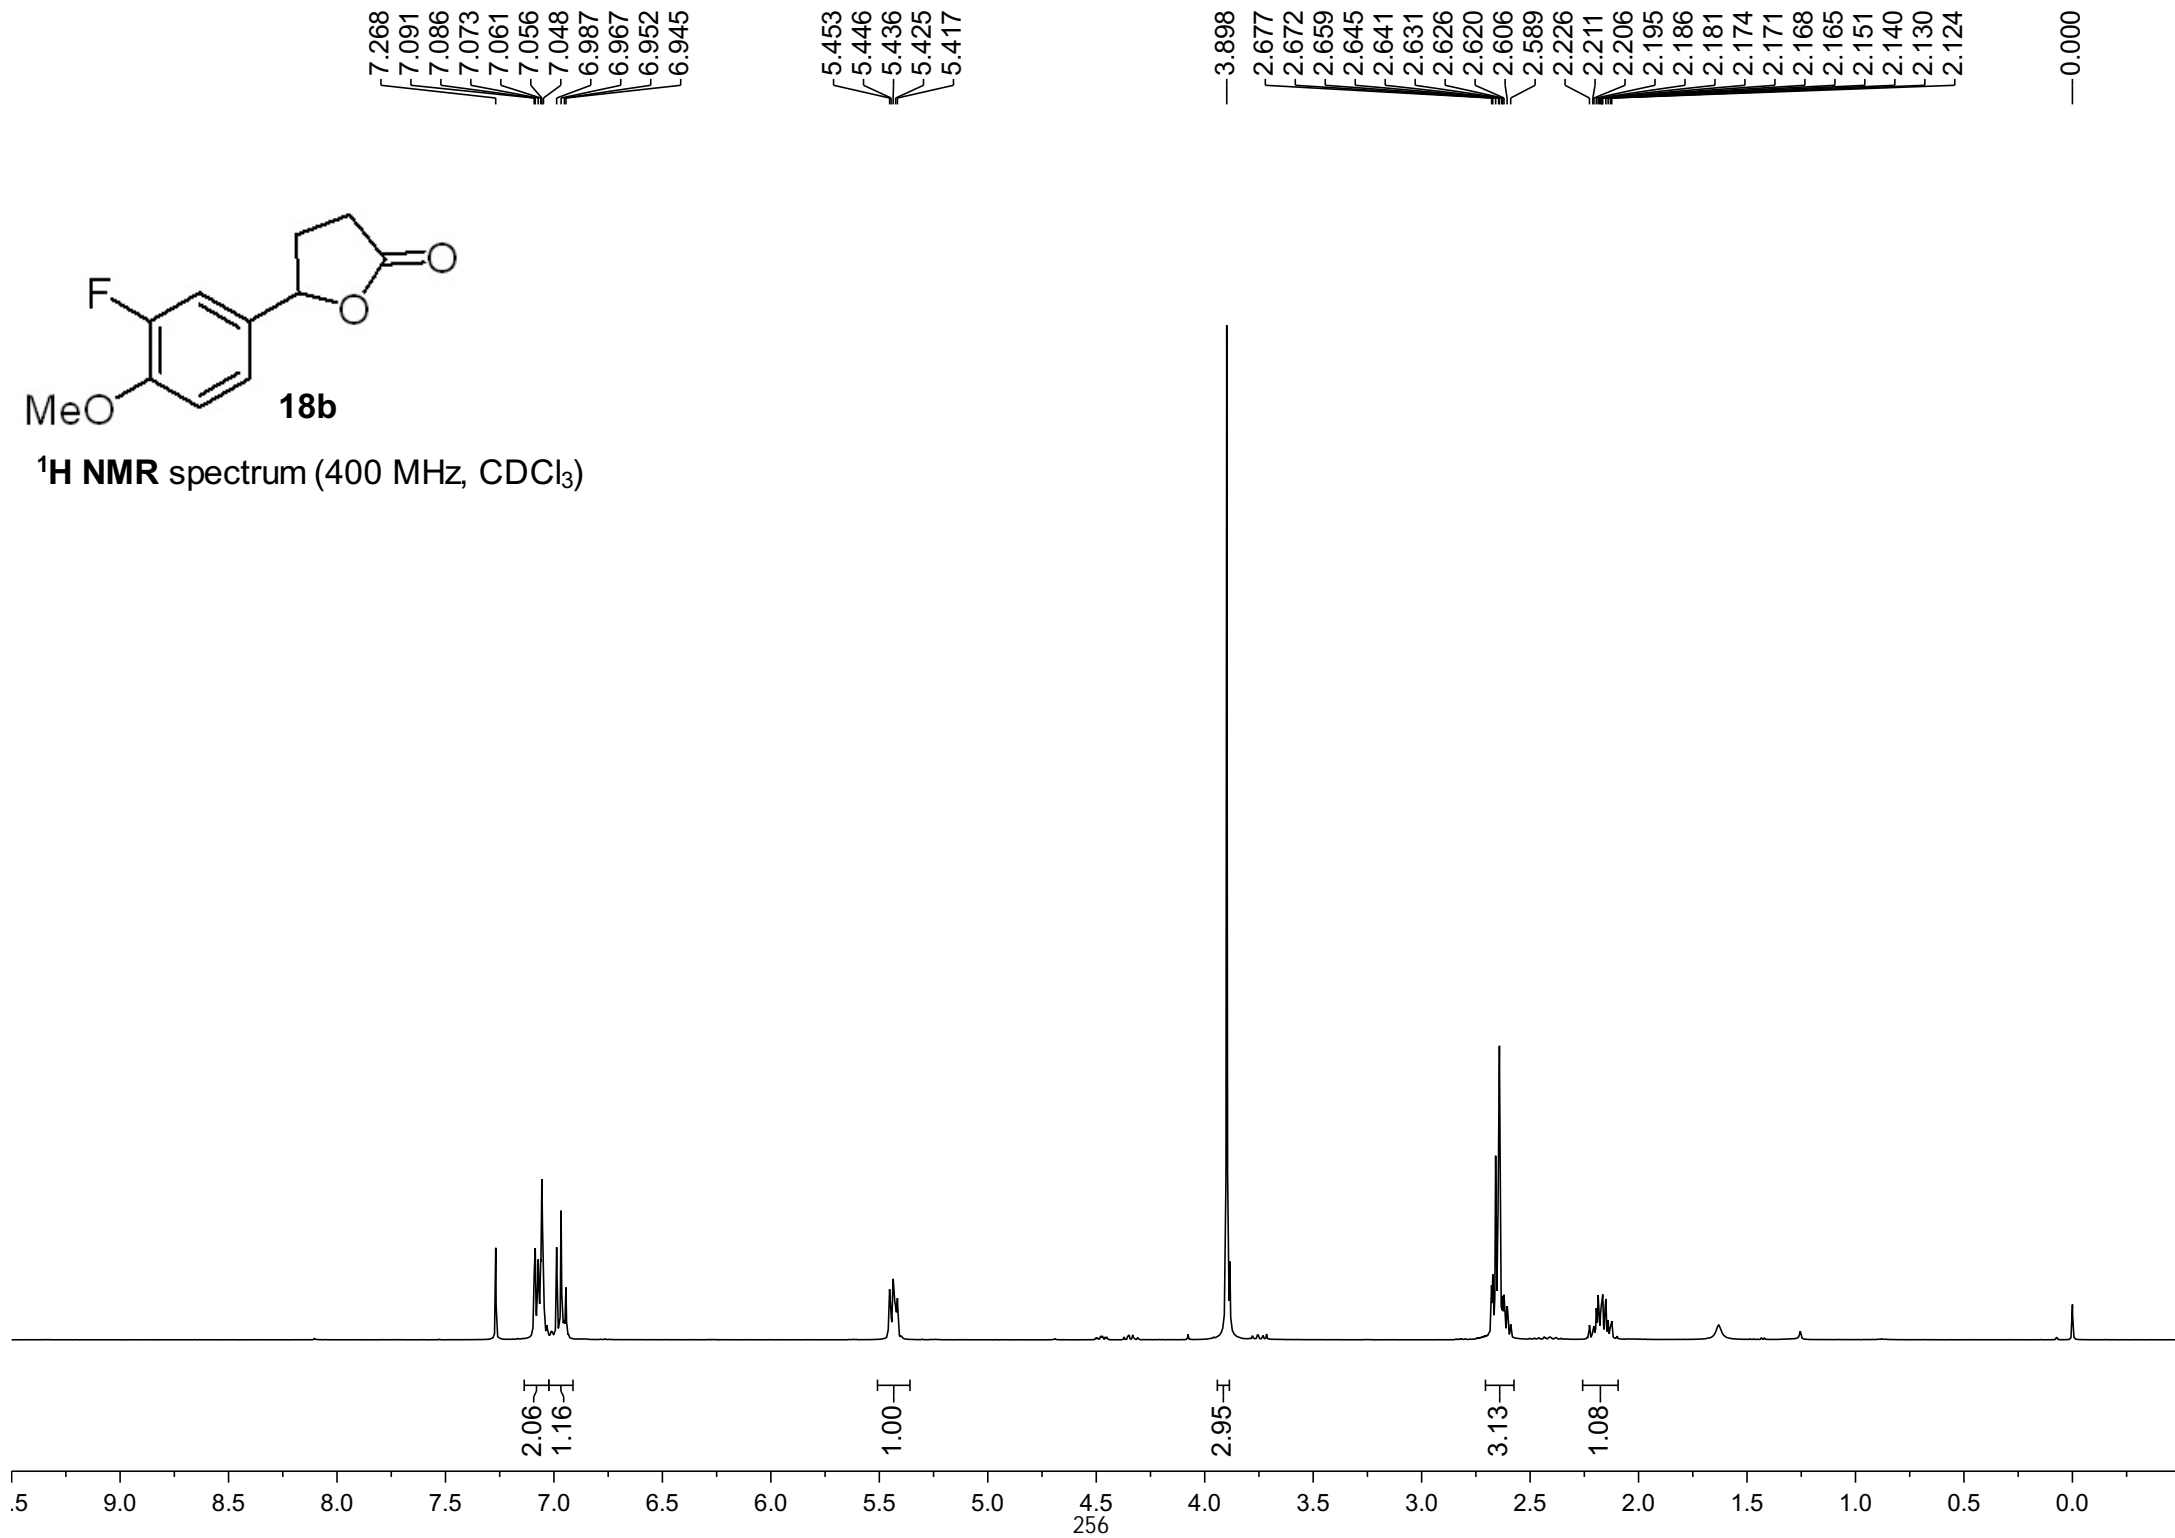

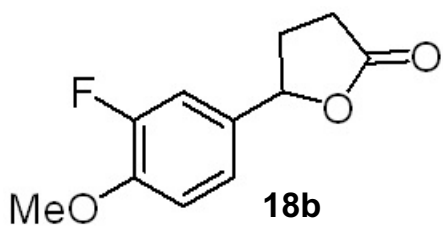

<sup>13</sup>C NMR spectrum (100 MHz, CDCl<sub>3</sub>)

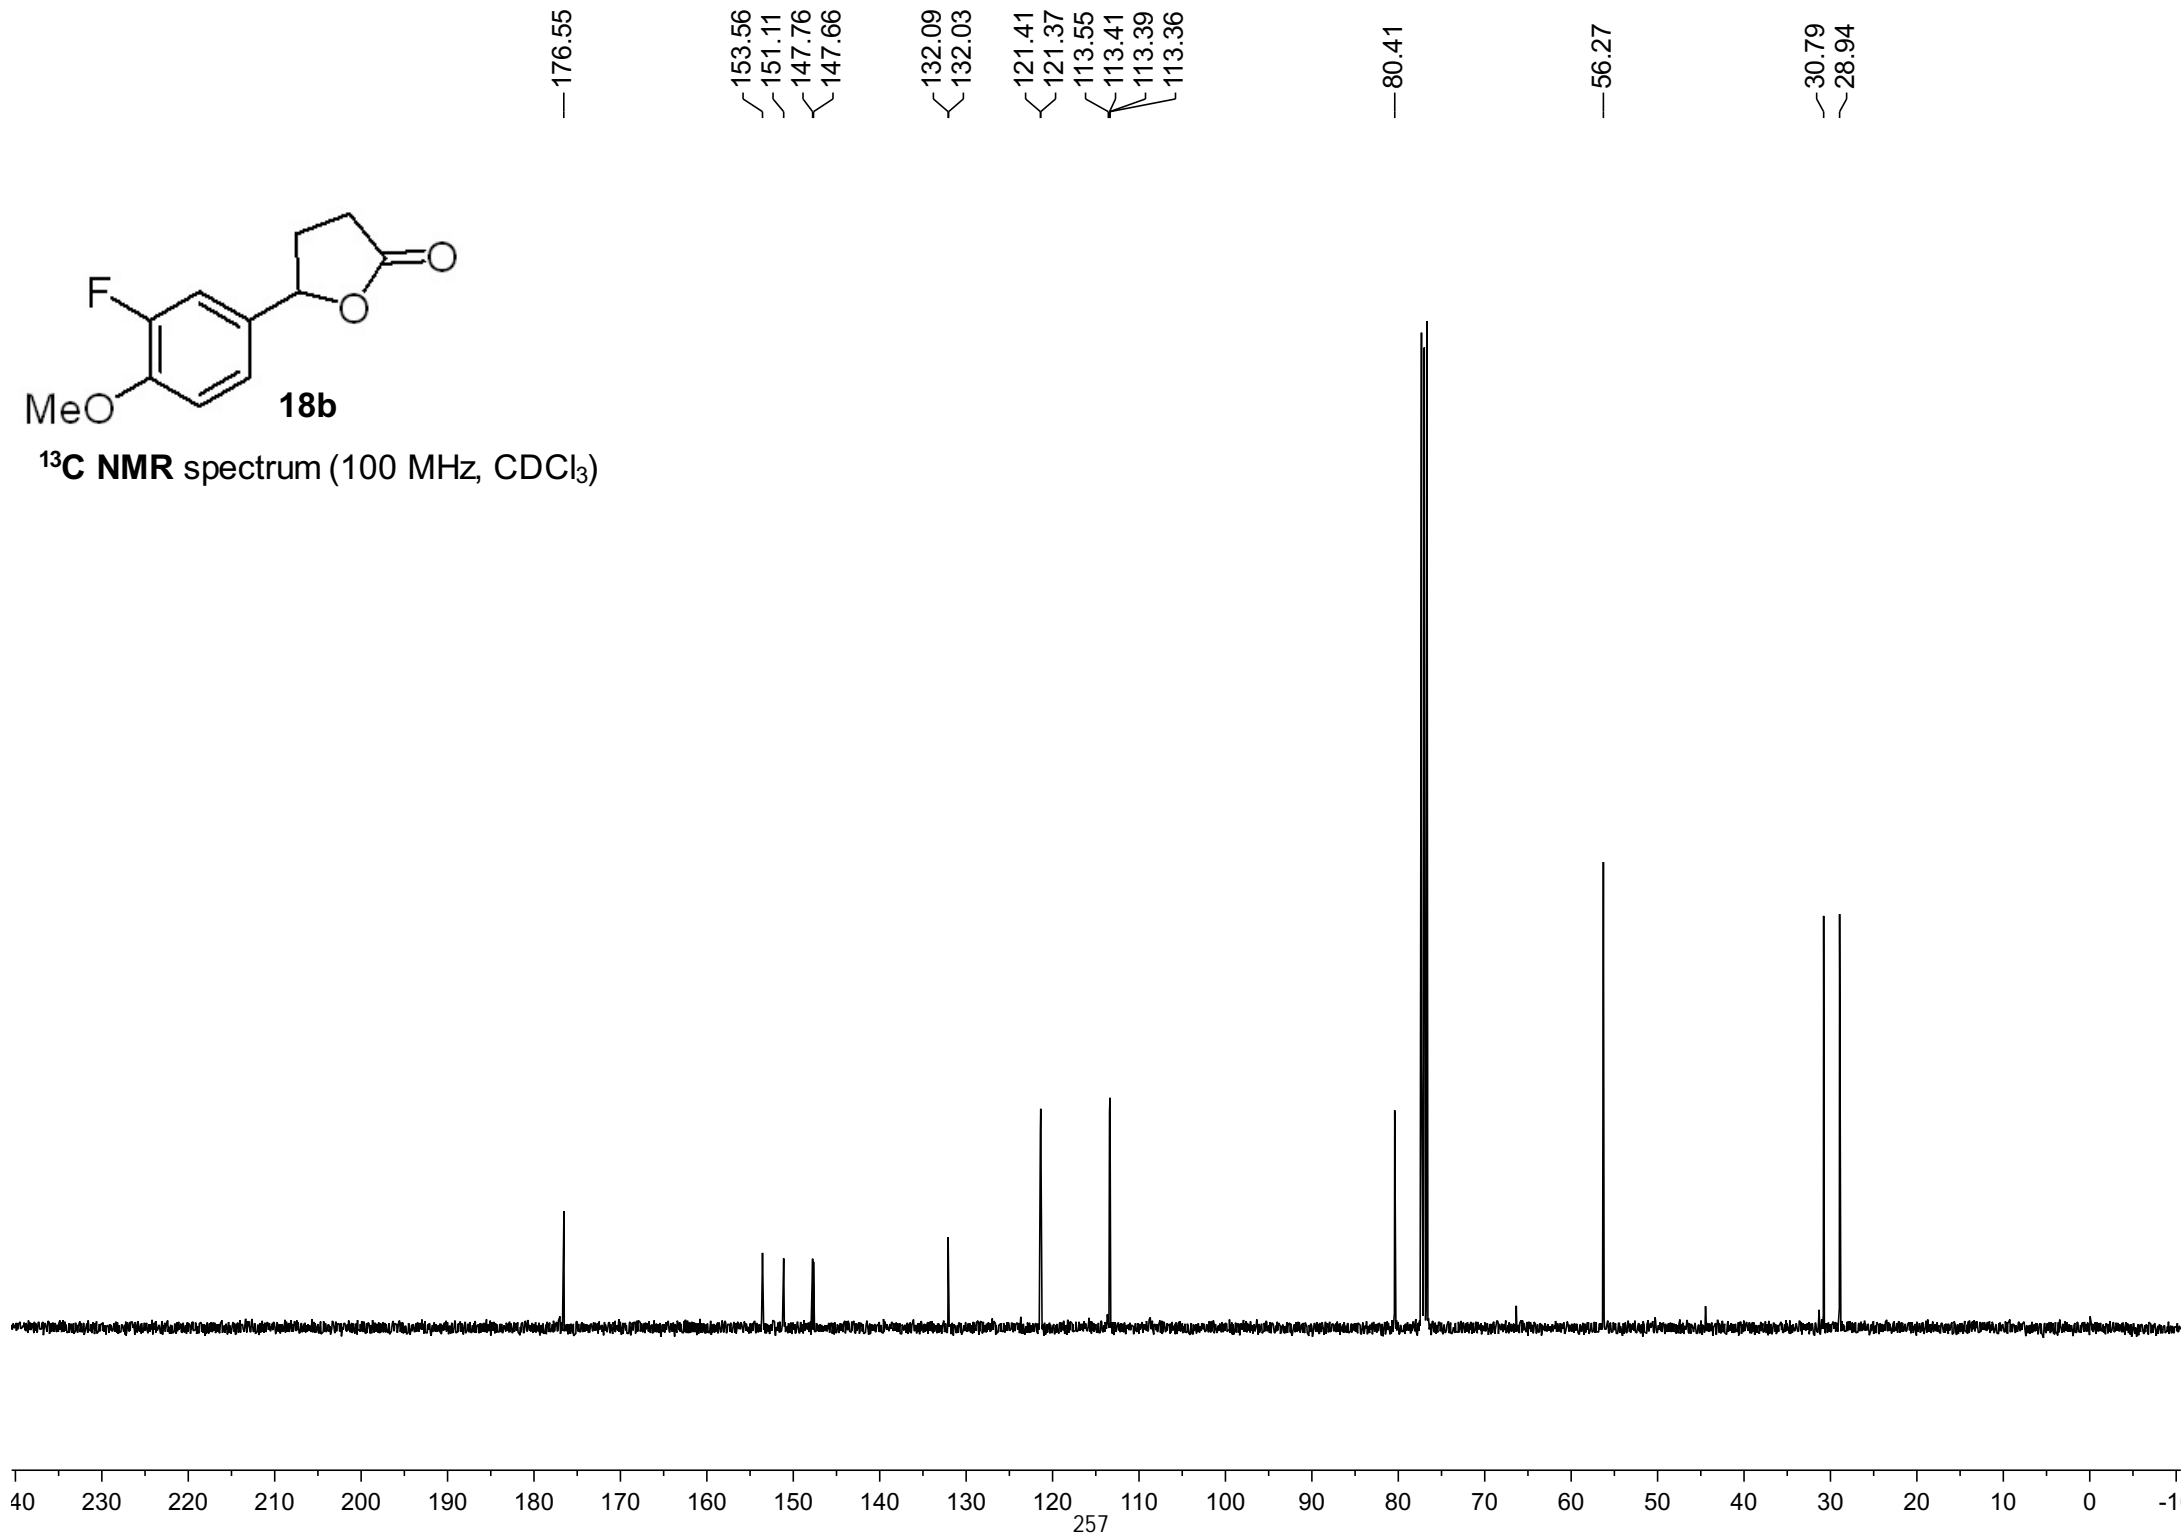

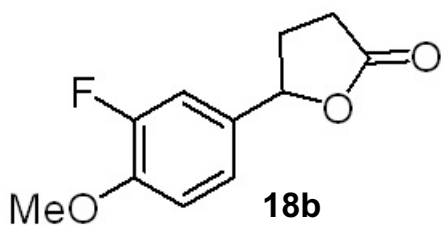

<sup>19</sup>F NMR spectrum (376 MHz, CDCl<sub>3</sub>)

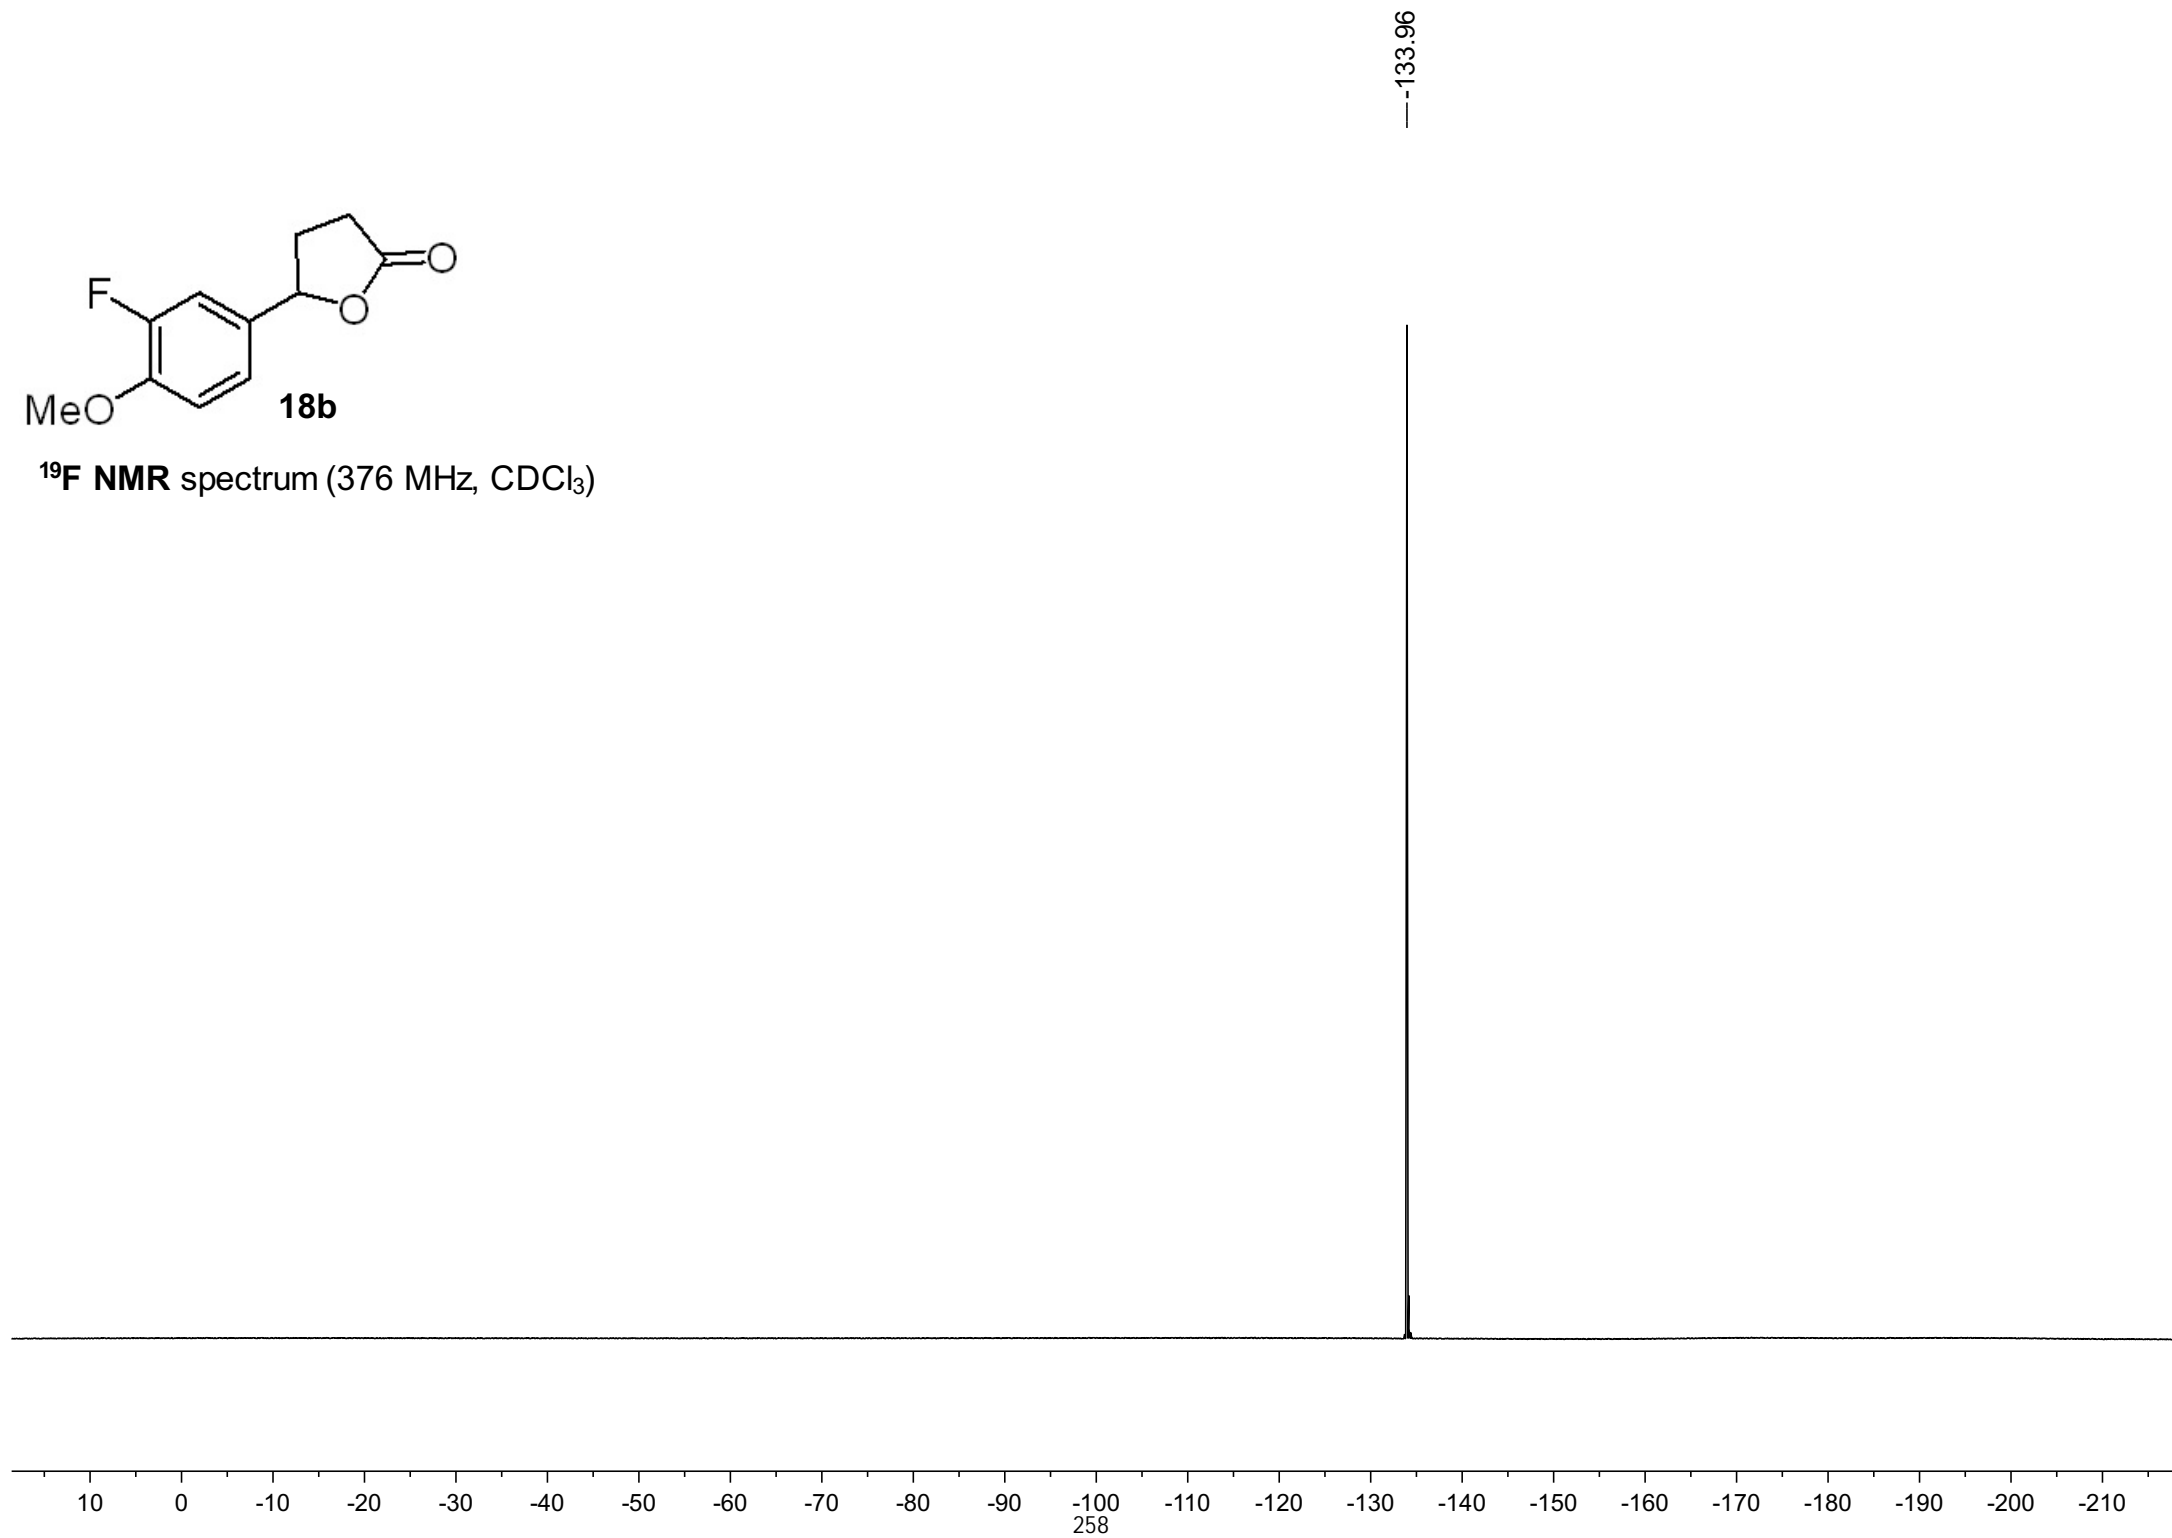

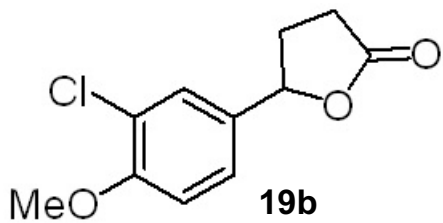

<sup>1</sup>H NMR spectrum (400 MHz, CDCl<sub>3</sub>)

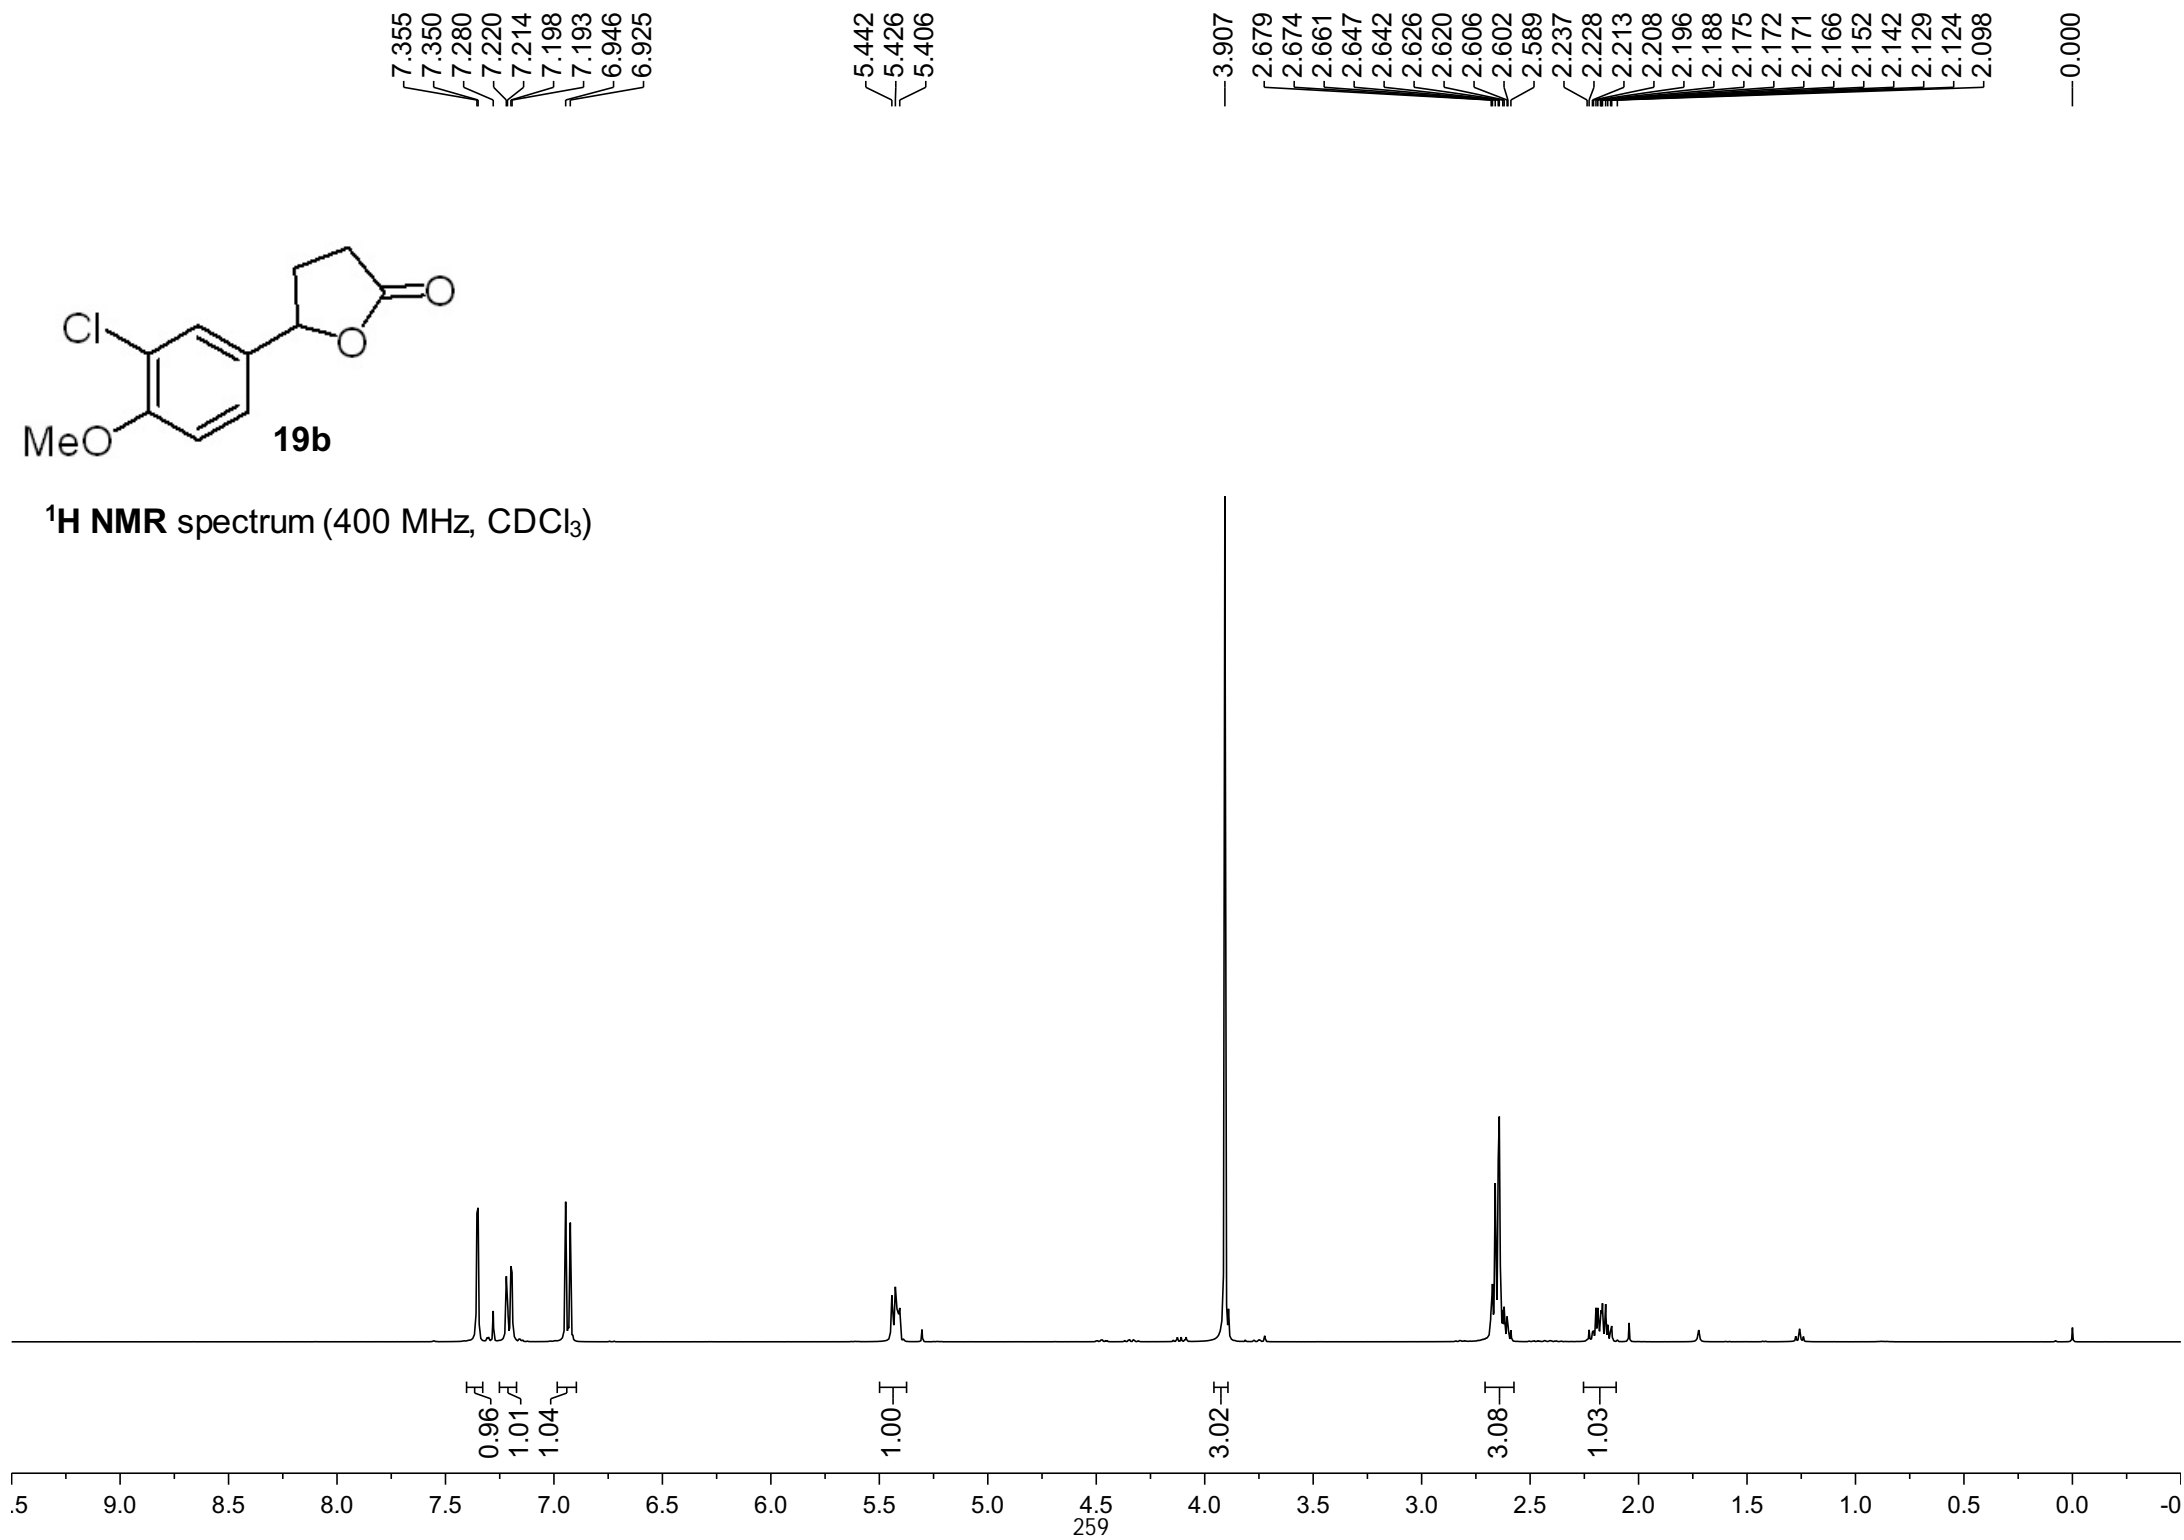





<sup>13</sup>C NMR spectrum (100 MHz, CDCl<sub>3</sub>)

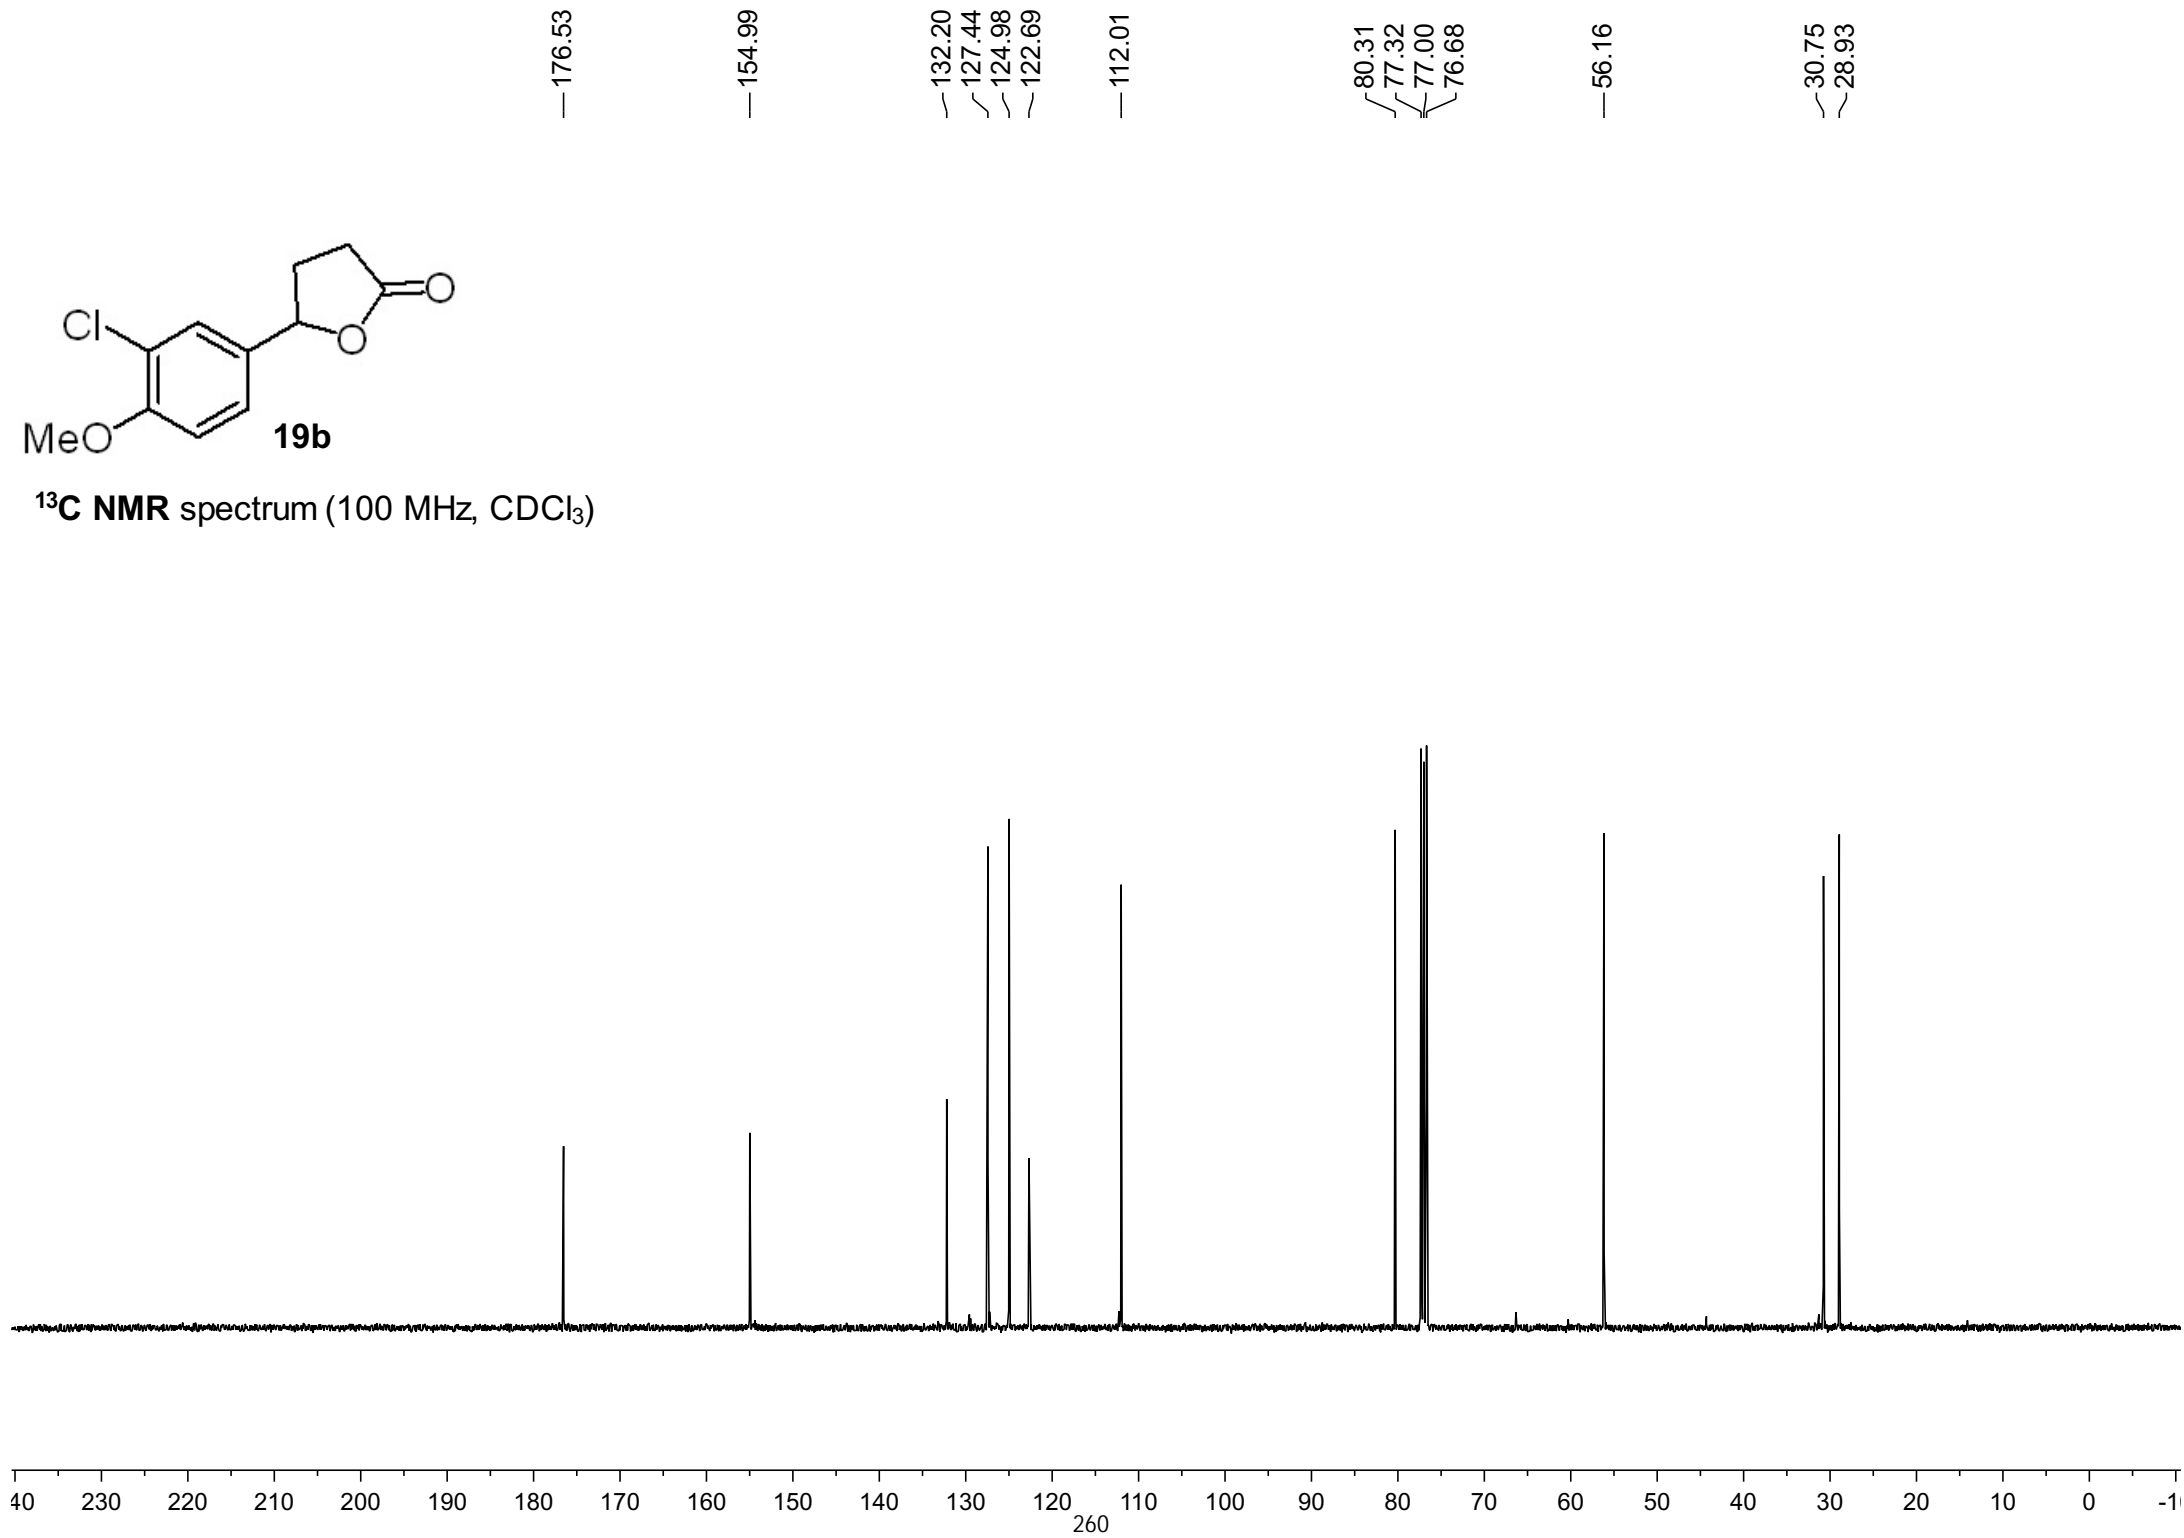

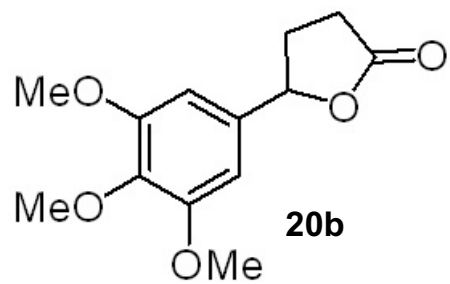

<sup>1</sup>H NMR spectrum (600 MHz, CDCl<sub>3</sub>)

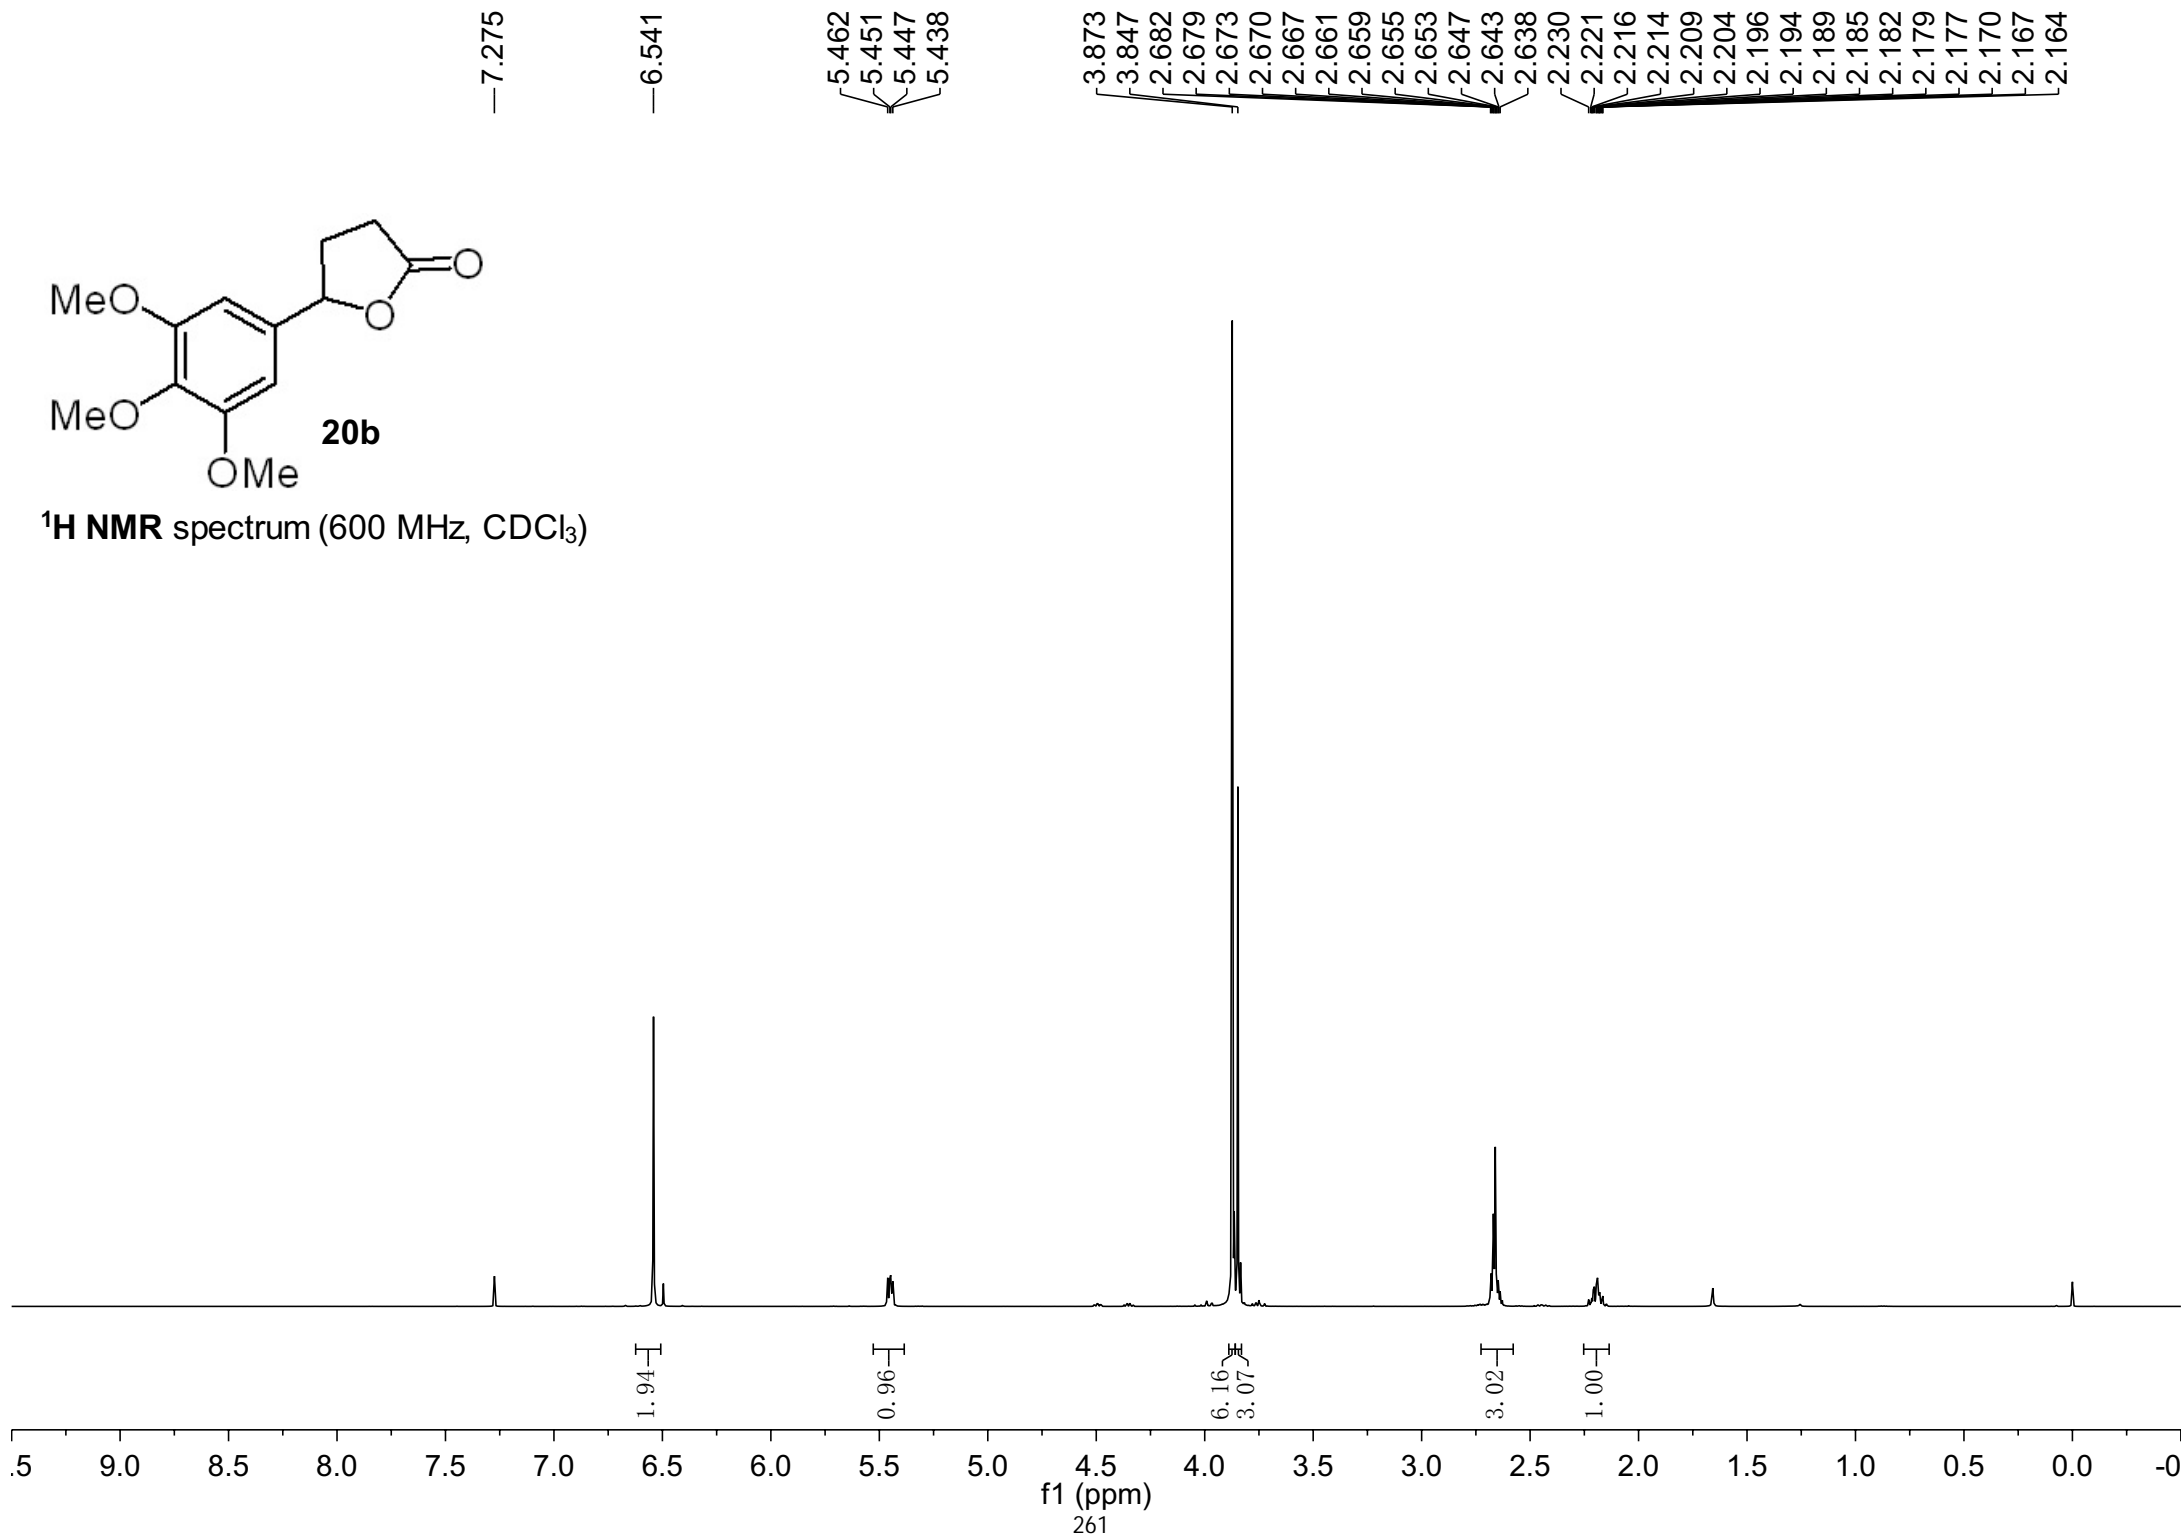



<sup>13</sup>C NMR spectrum (150 MHz, CDCl<sub>3</sub>)

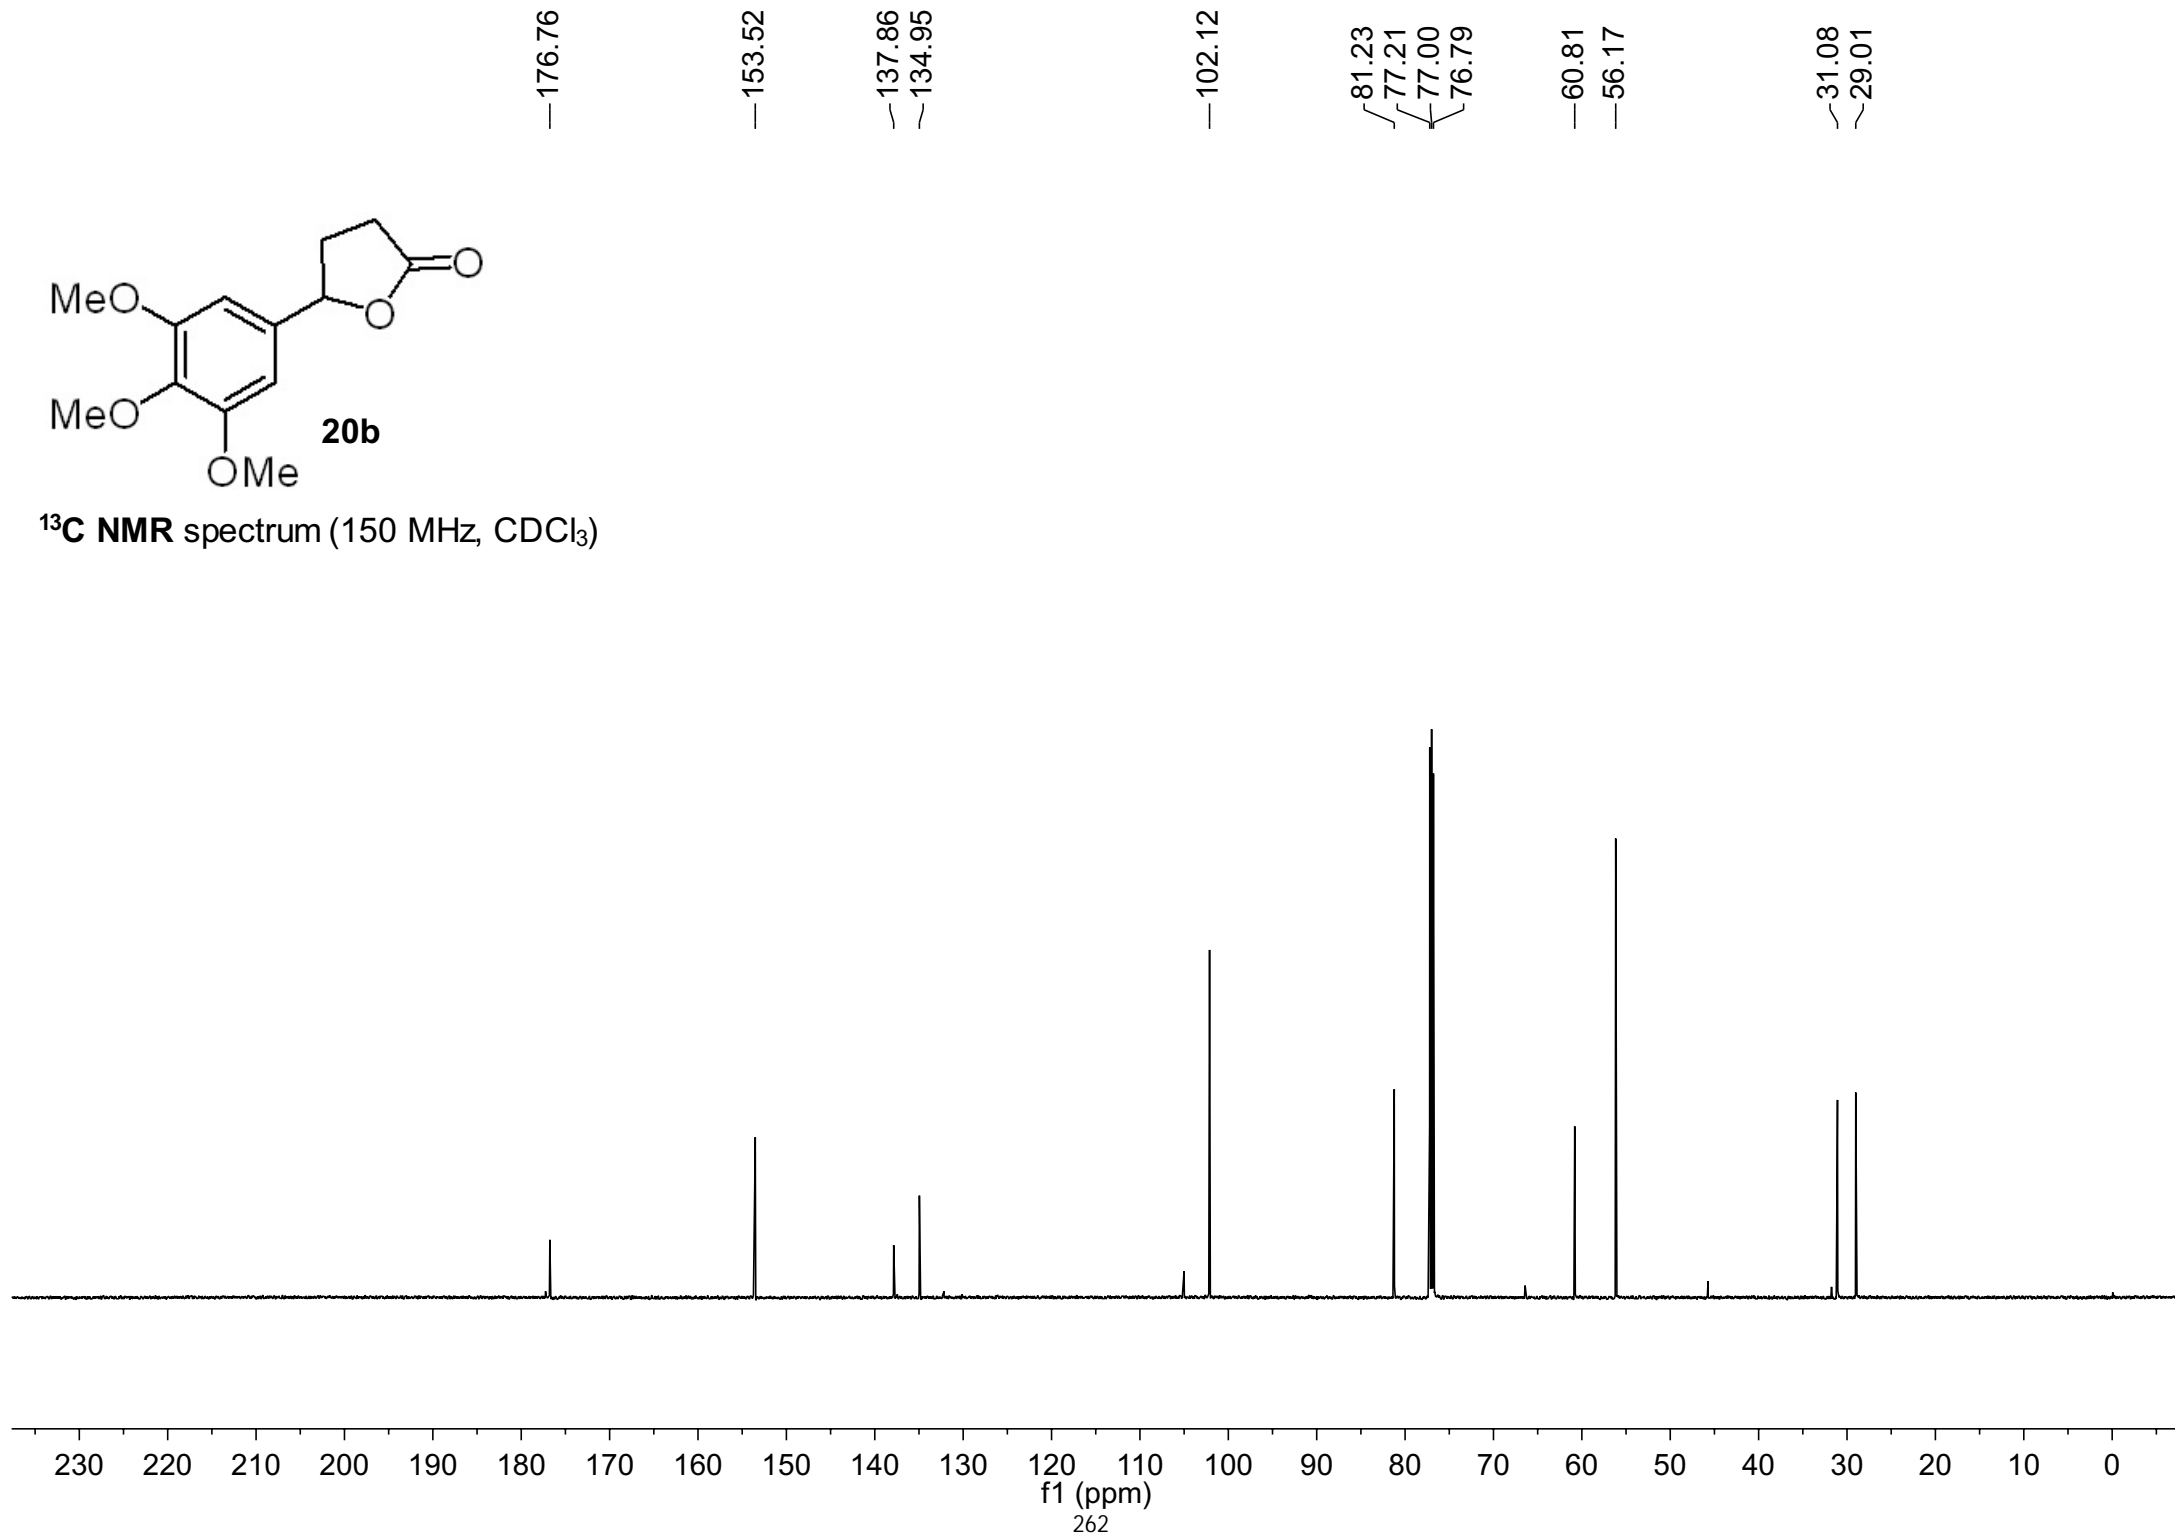

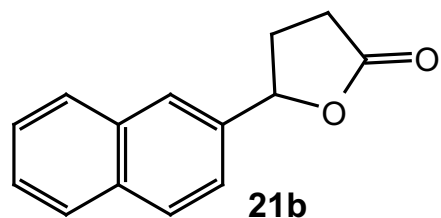

<sup>1</sup>H NMR spectrum (400 MHz, CDCl<sub>3</sub>)

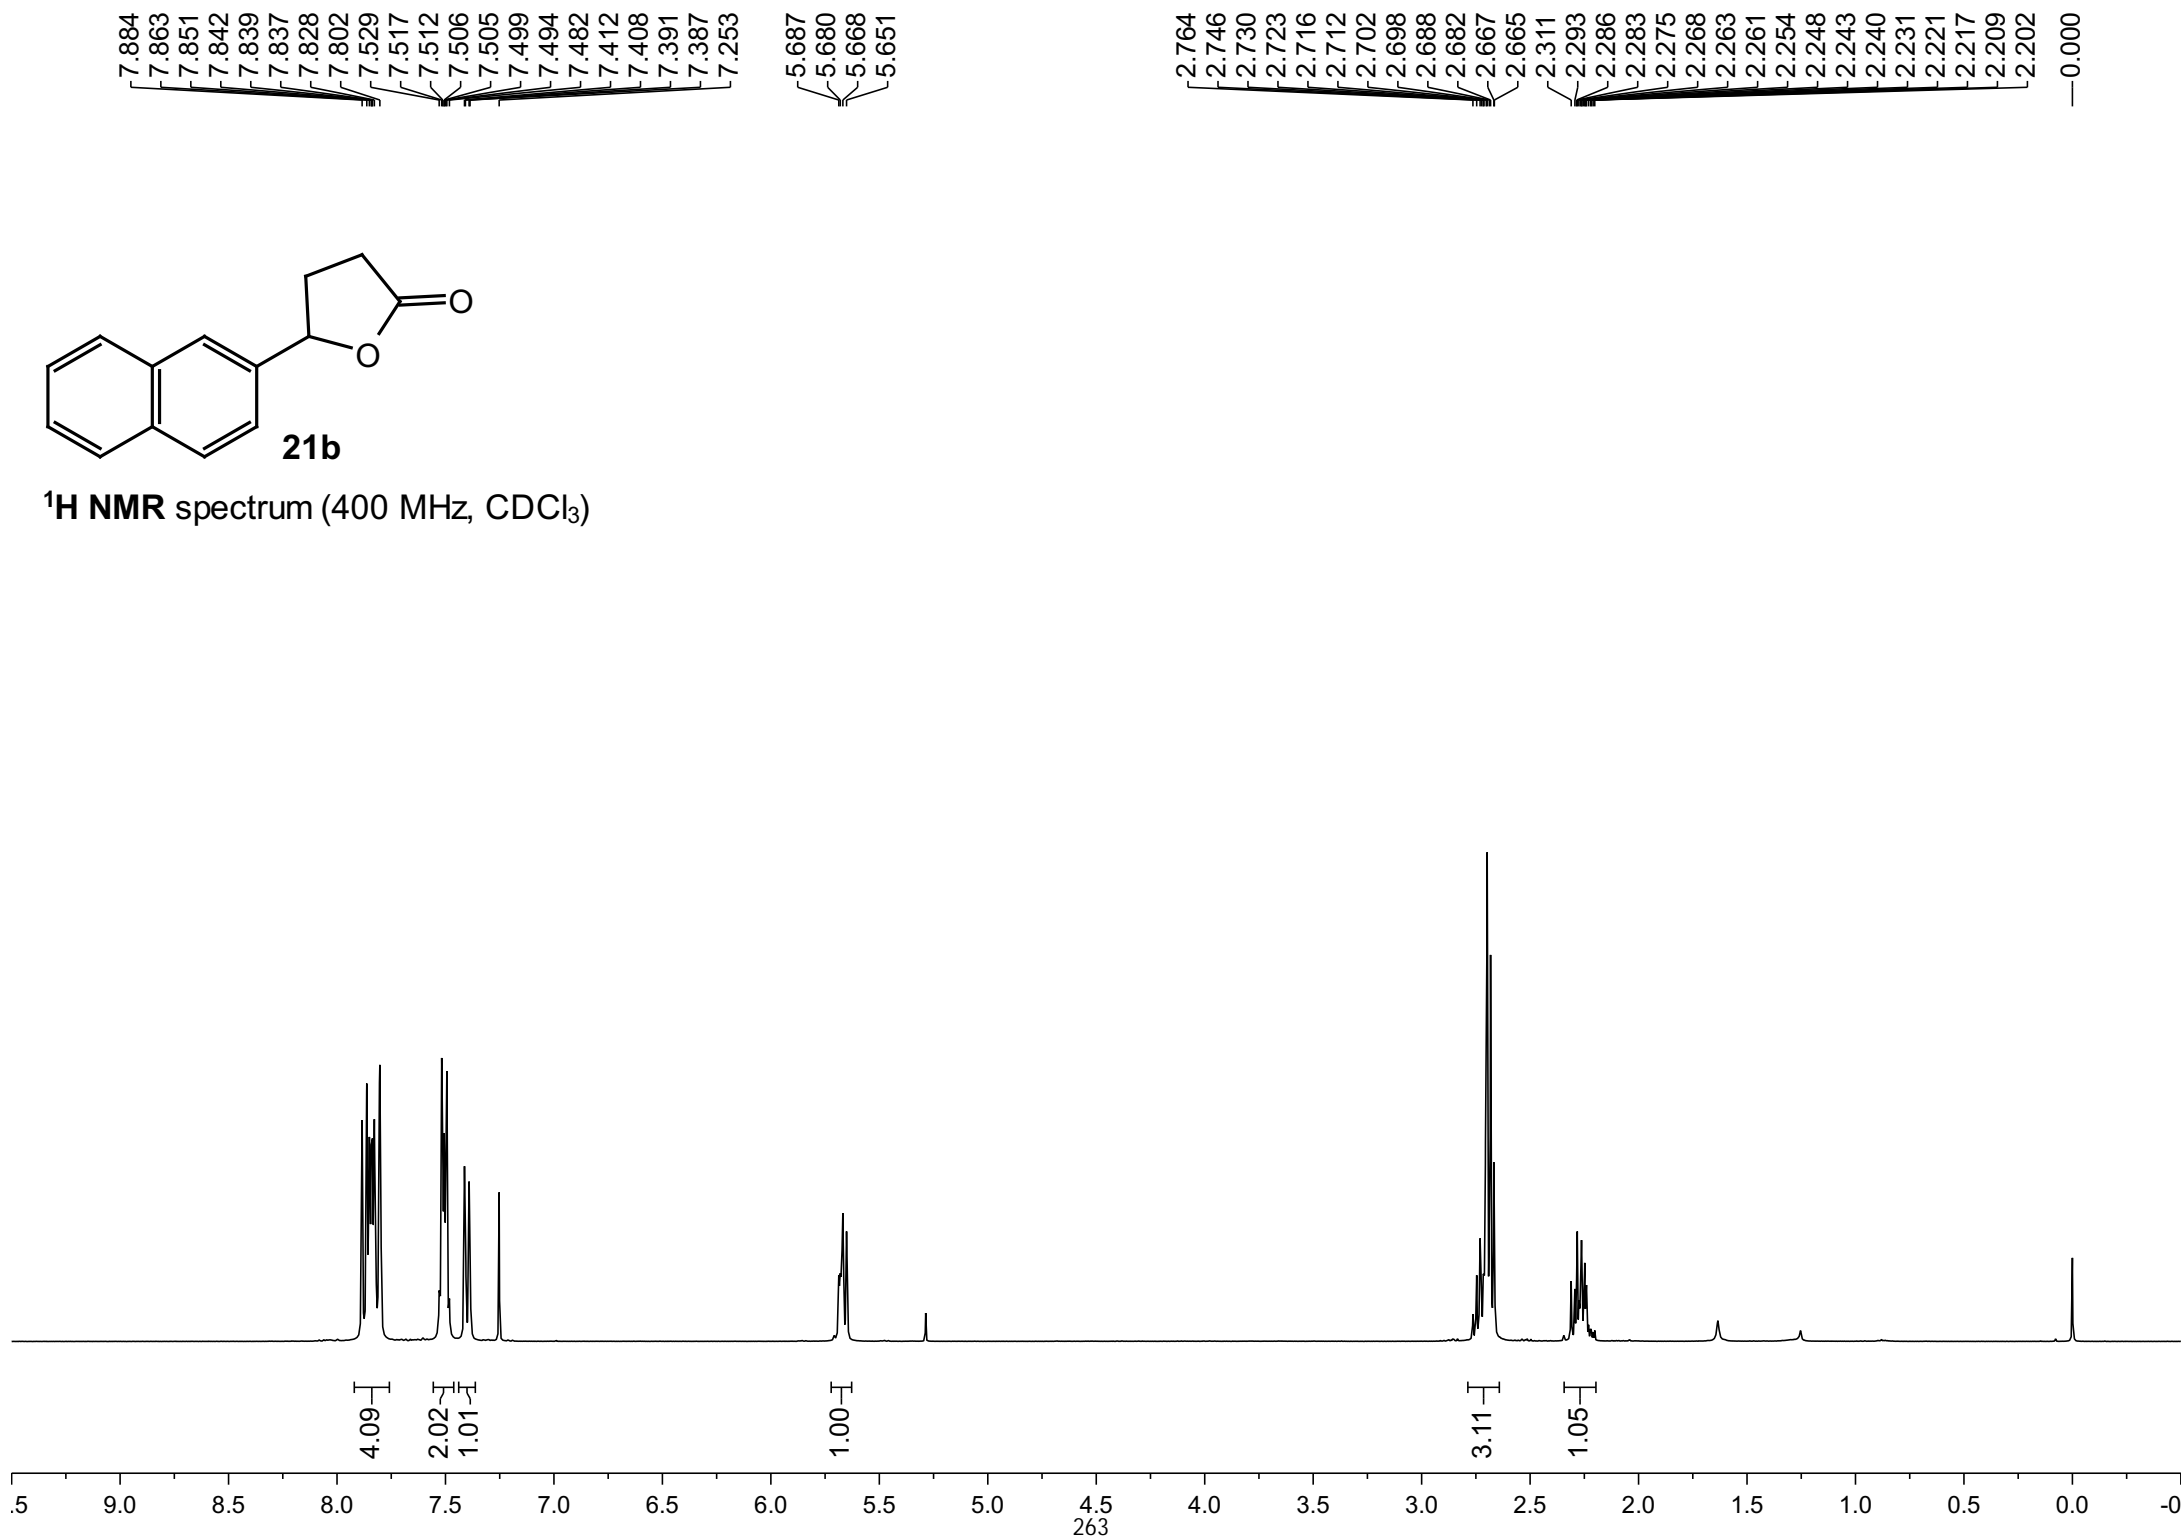

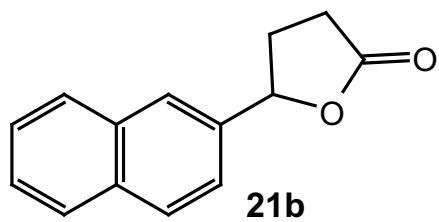

<sup>13</sup>C NMR spectrum (100 MHz, CDCl<sub>3</sub>)

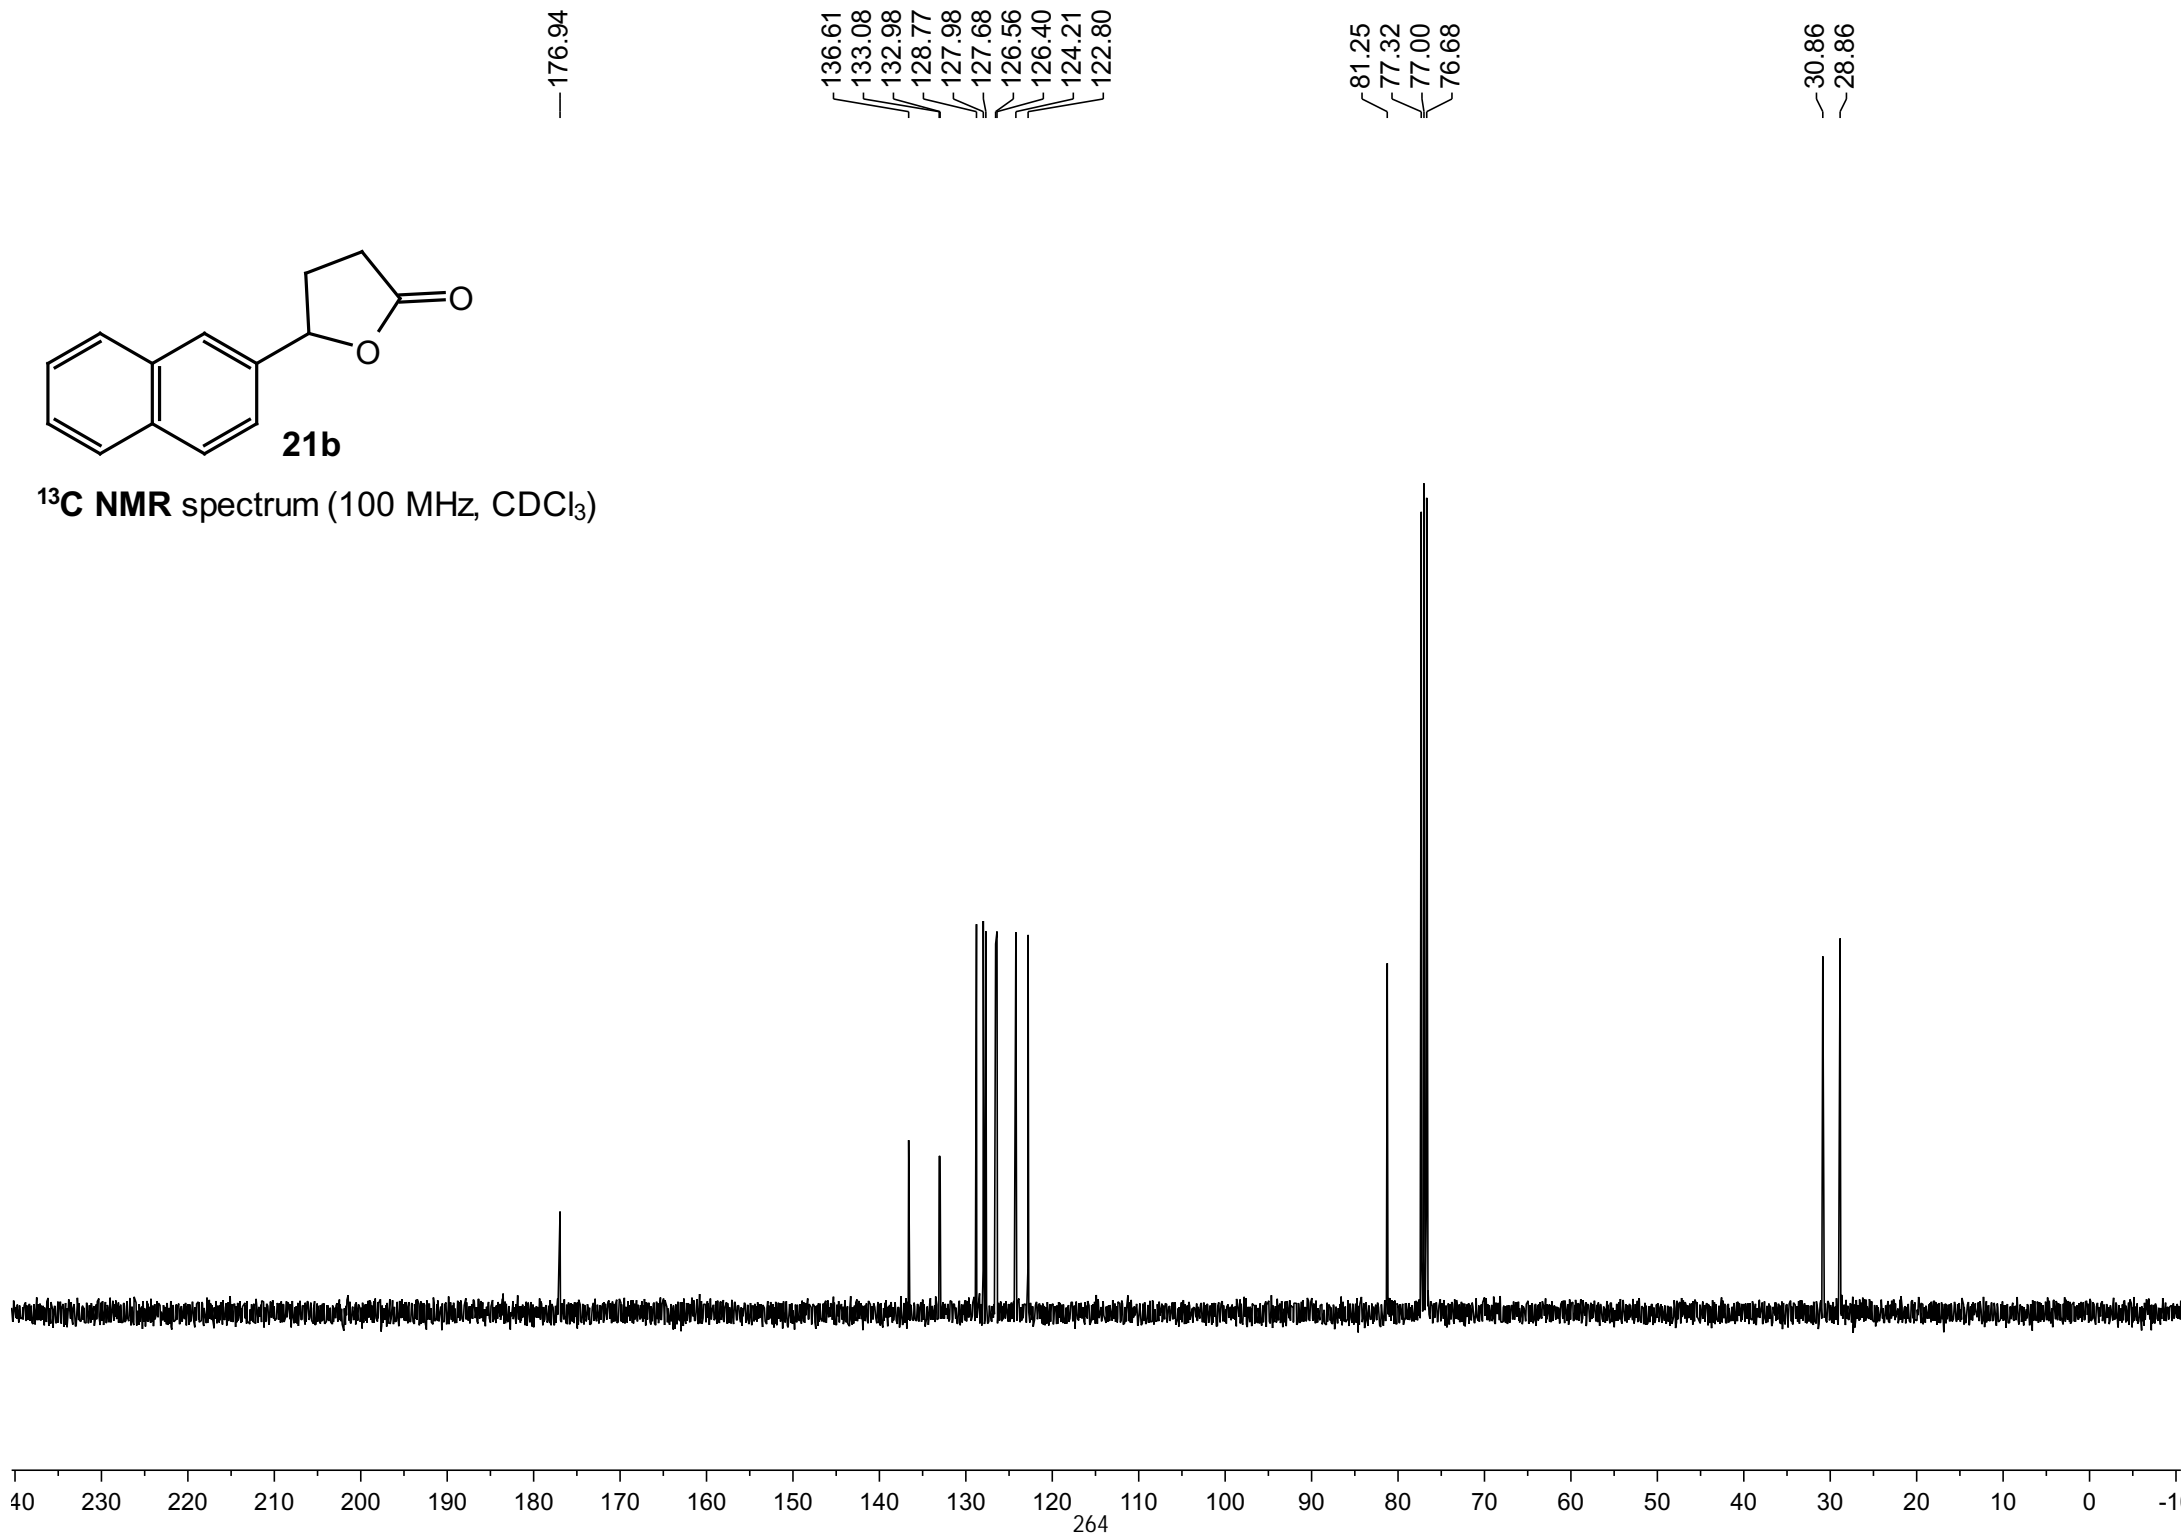

7.920  
7.913  
7.901  
7.896  
7.848  
7.828  
7.578  
7.575  
7.562  
7.560  
7.548  
7.543  
7.537  
7.528  
7.525  
7.511  
7.508  
7.501  
7.481  
7.462  
7.254  
6.281  
6.263  
6.246

2.936  
2.919  
2.914  
2.904  
2.901  
2.897  
2.887  
2.883  
2.879  
2.868  
2.865  
2.847  
2.753  
2.733  
2.709  
2.689  
2.672  
2.667  
2.651  
2.646  
2.628  
2.623  
2.606  
2.333  
2.317  
2.312  
2.311  
2.301  
2.296  
2.295  
2.291  
2.285  
2.282  
2.279  
2.275  
2.265  
2.262  
2.259  
2.243  
0.000

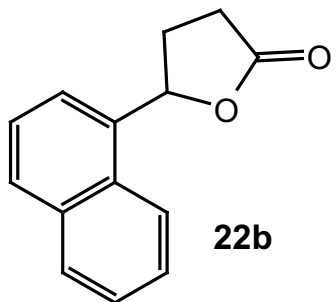

<sup>1</sup>H NMR spectrum (400 MHz, CDCl<sub>3</sub>)

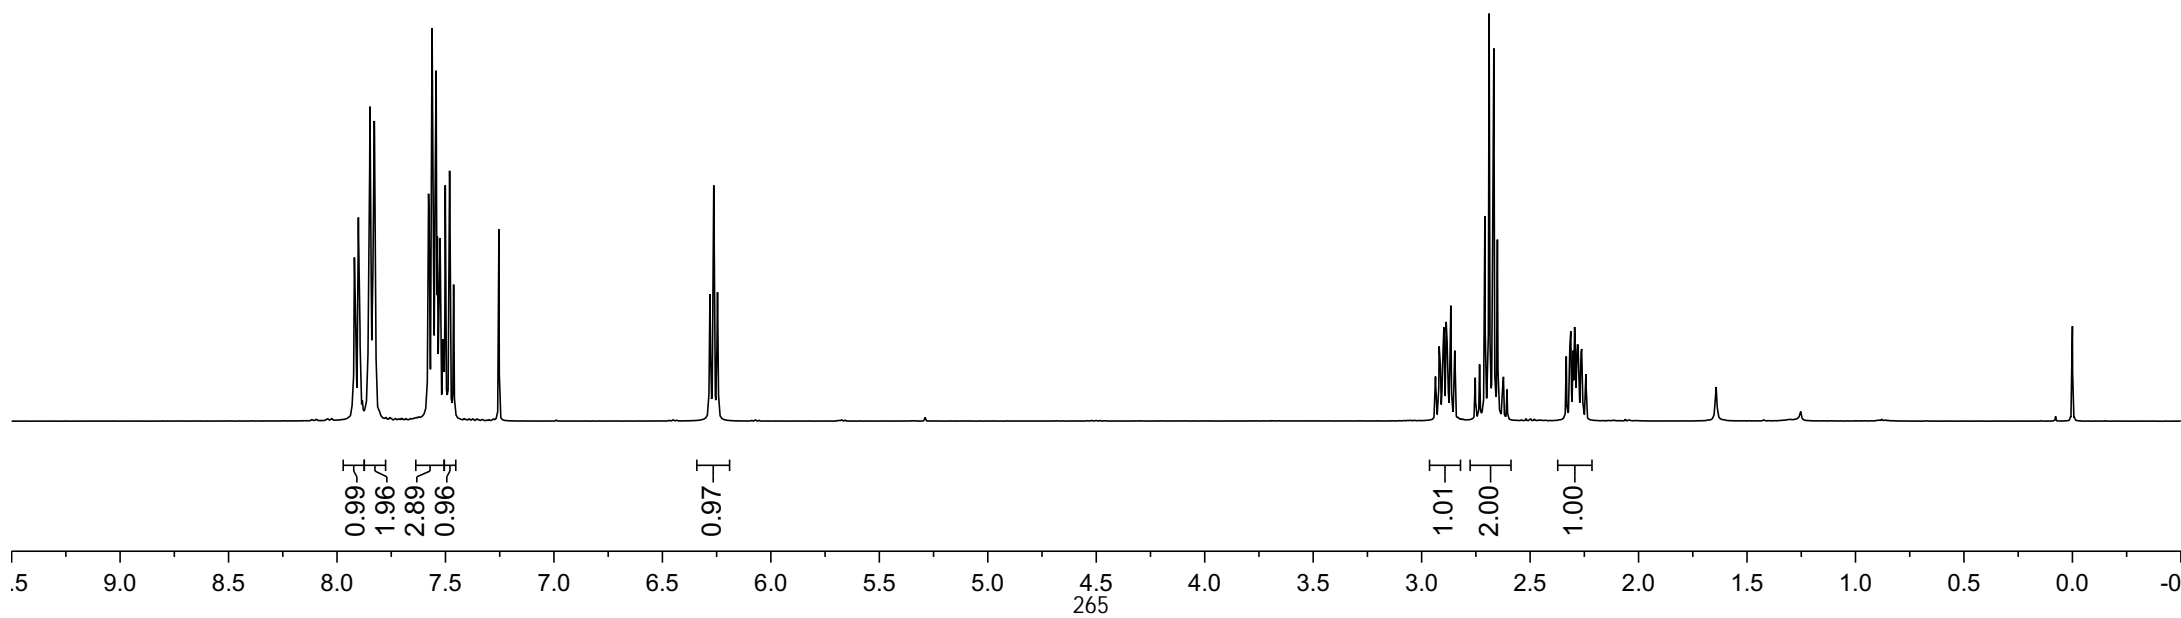

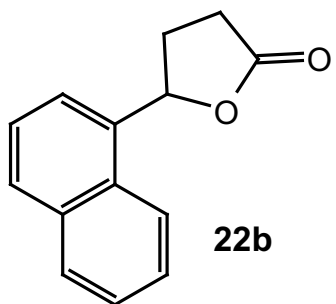

<sup>13</sup>C NMR spectrum (100 MHz, CDCl<sub>3</sub>)

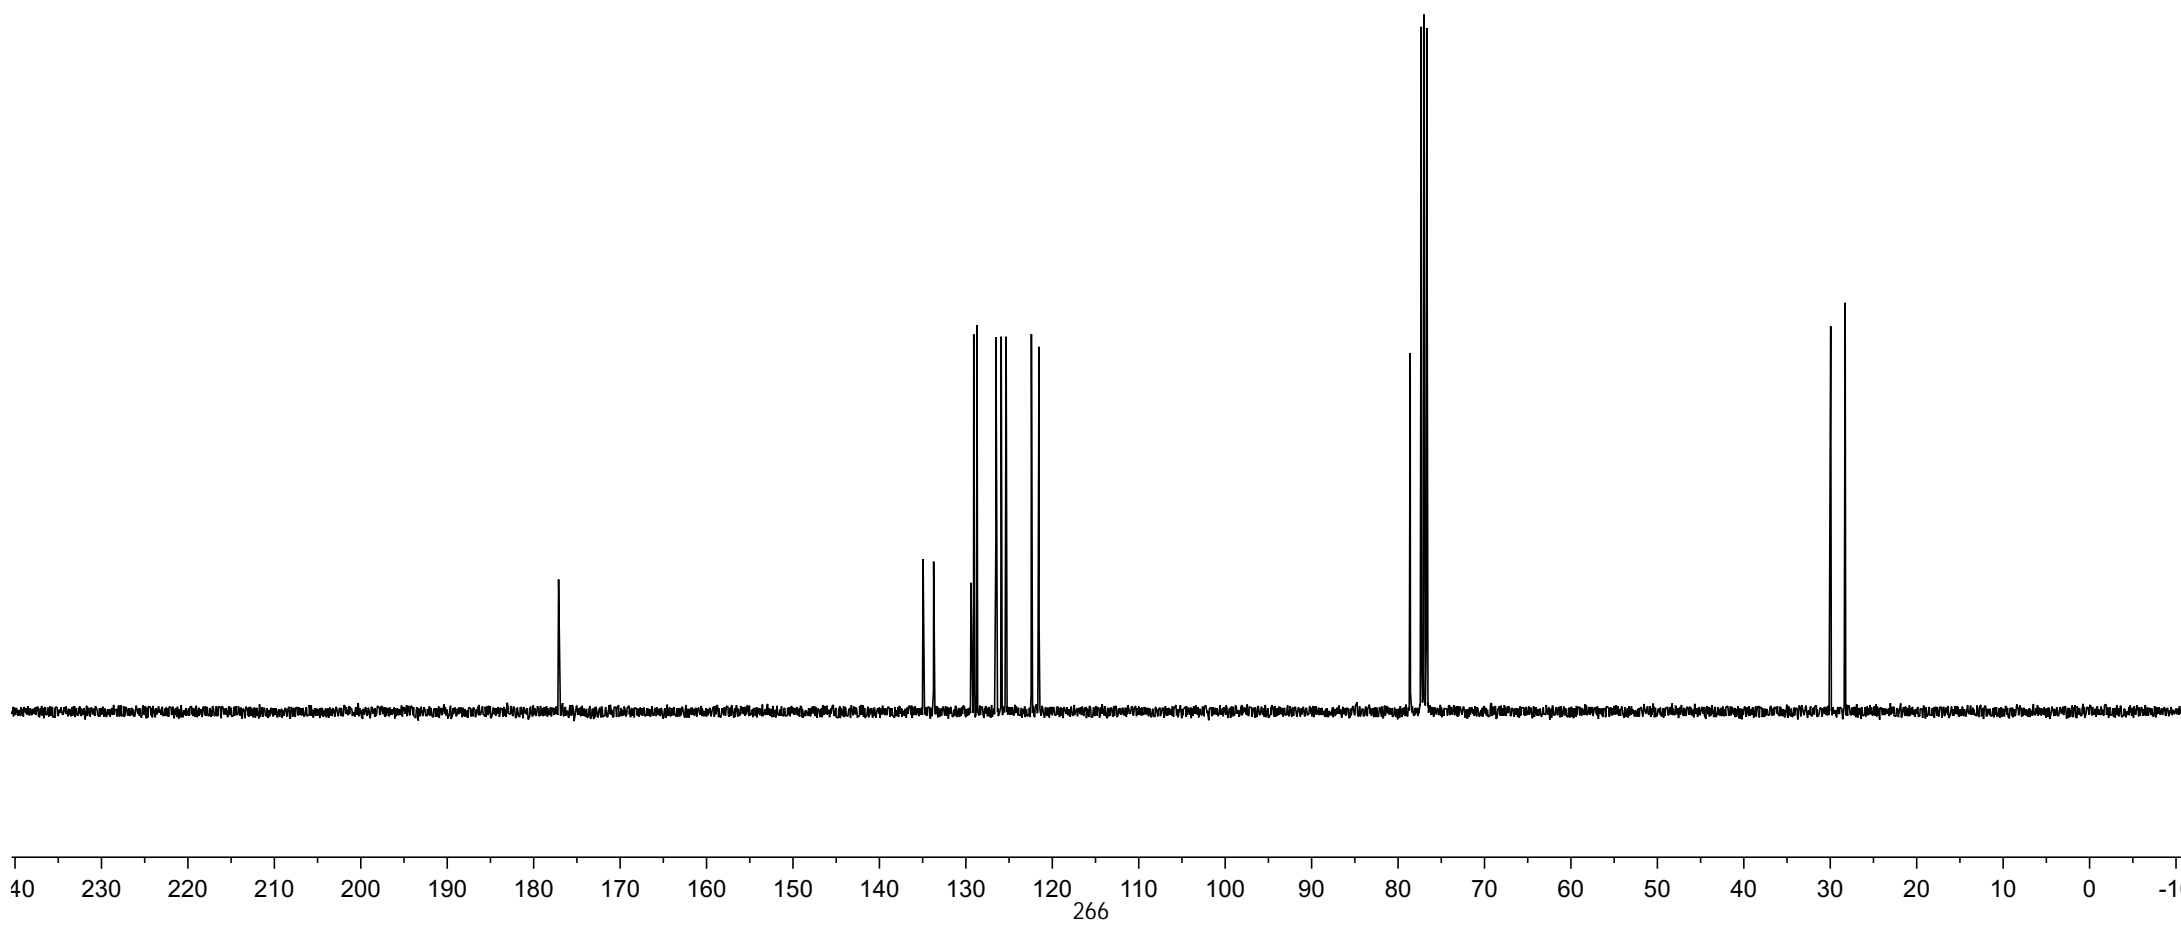

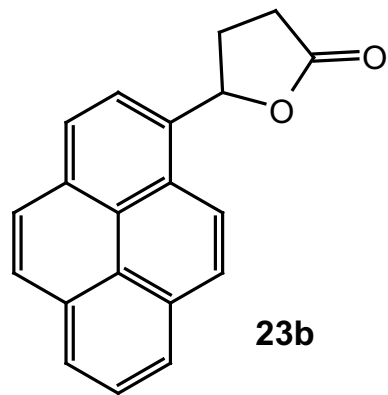

<sup>1</sup>H NMR spectrum (400 MHz, CDCl<sub>3</sub>)

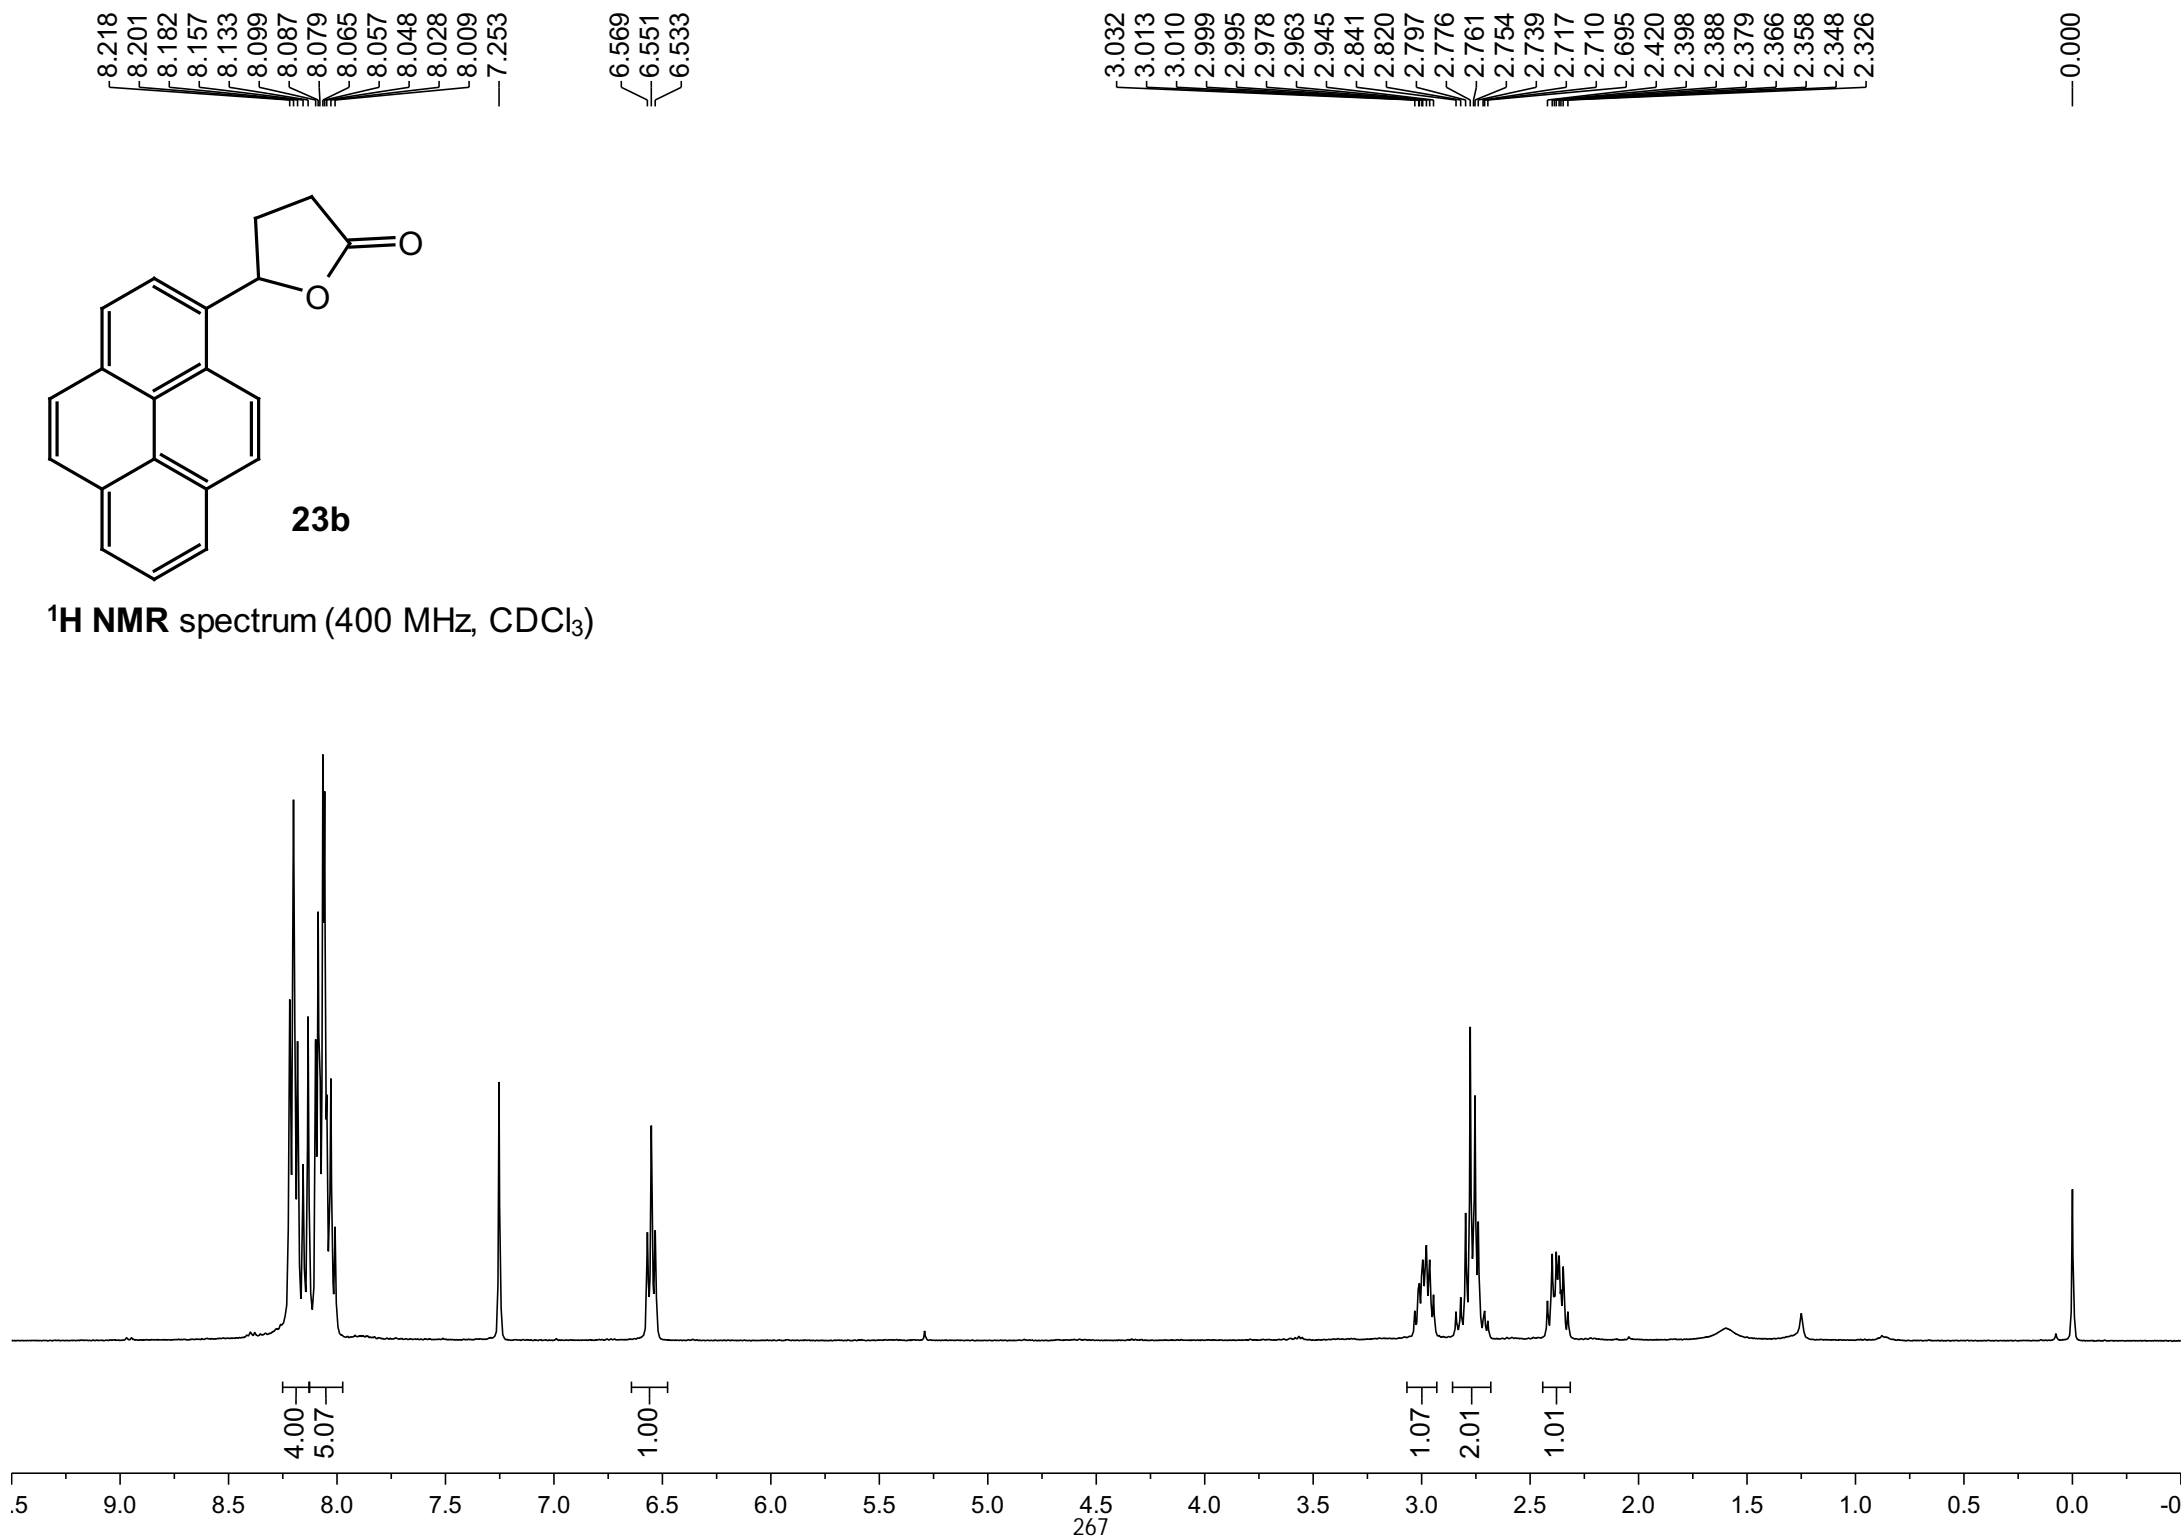



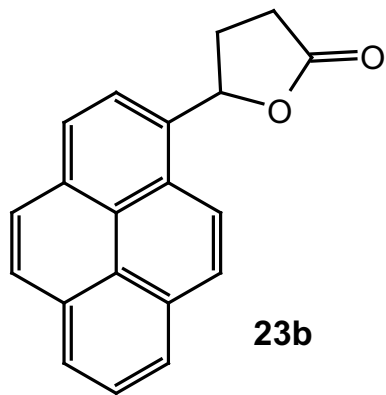

<sup>13</sup>C NMR spectrum (100 MHz, CDCl<sub>3</sub>)

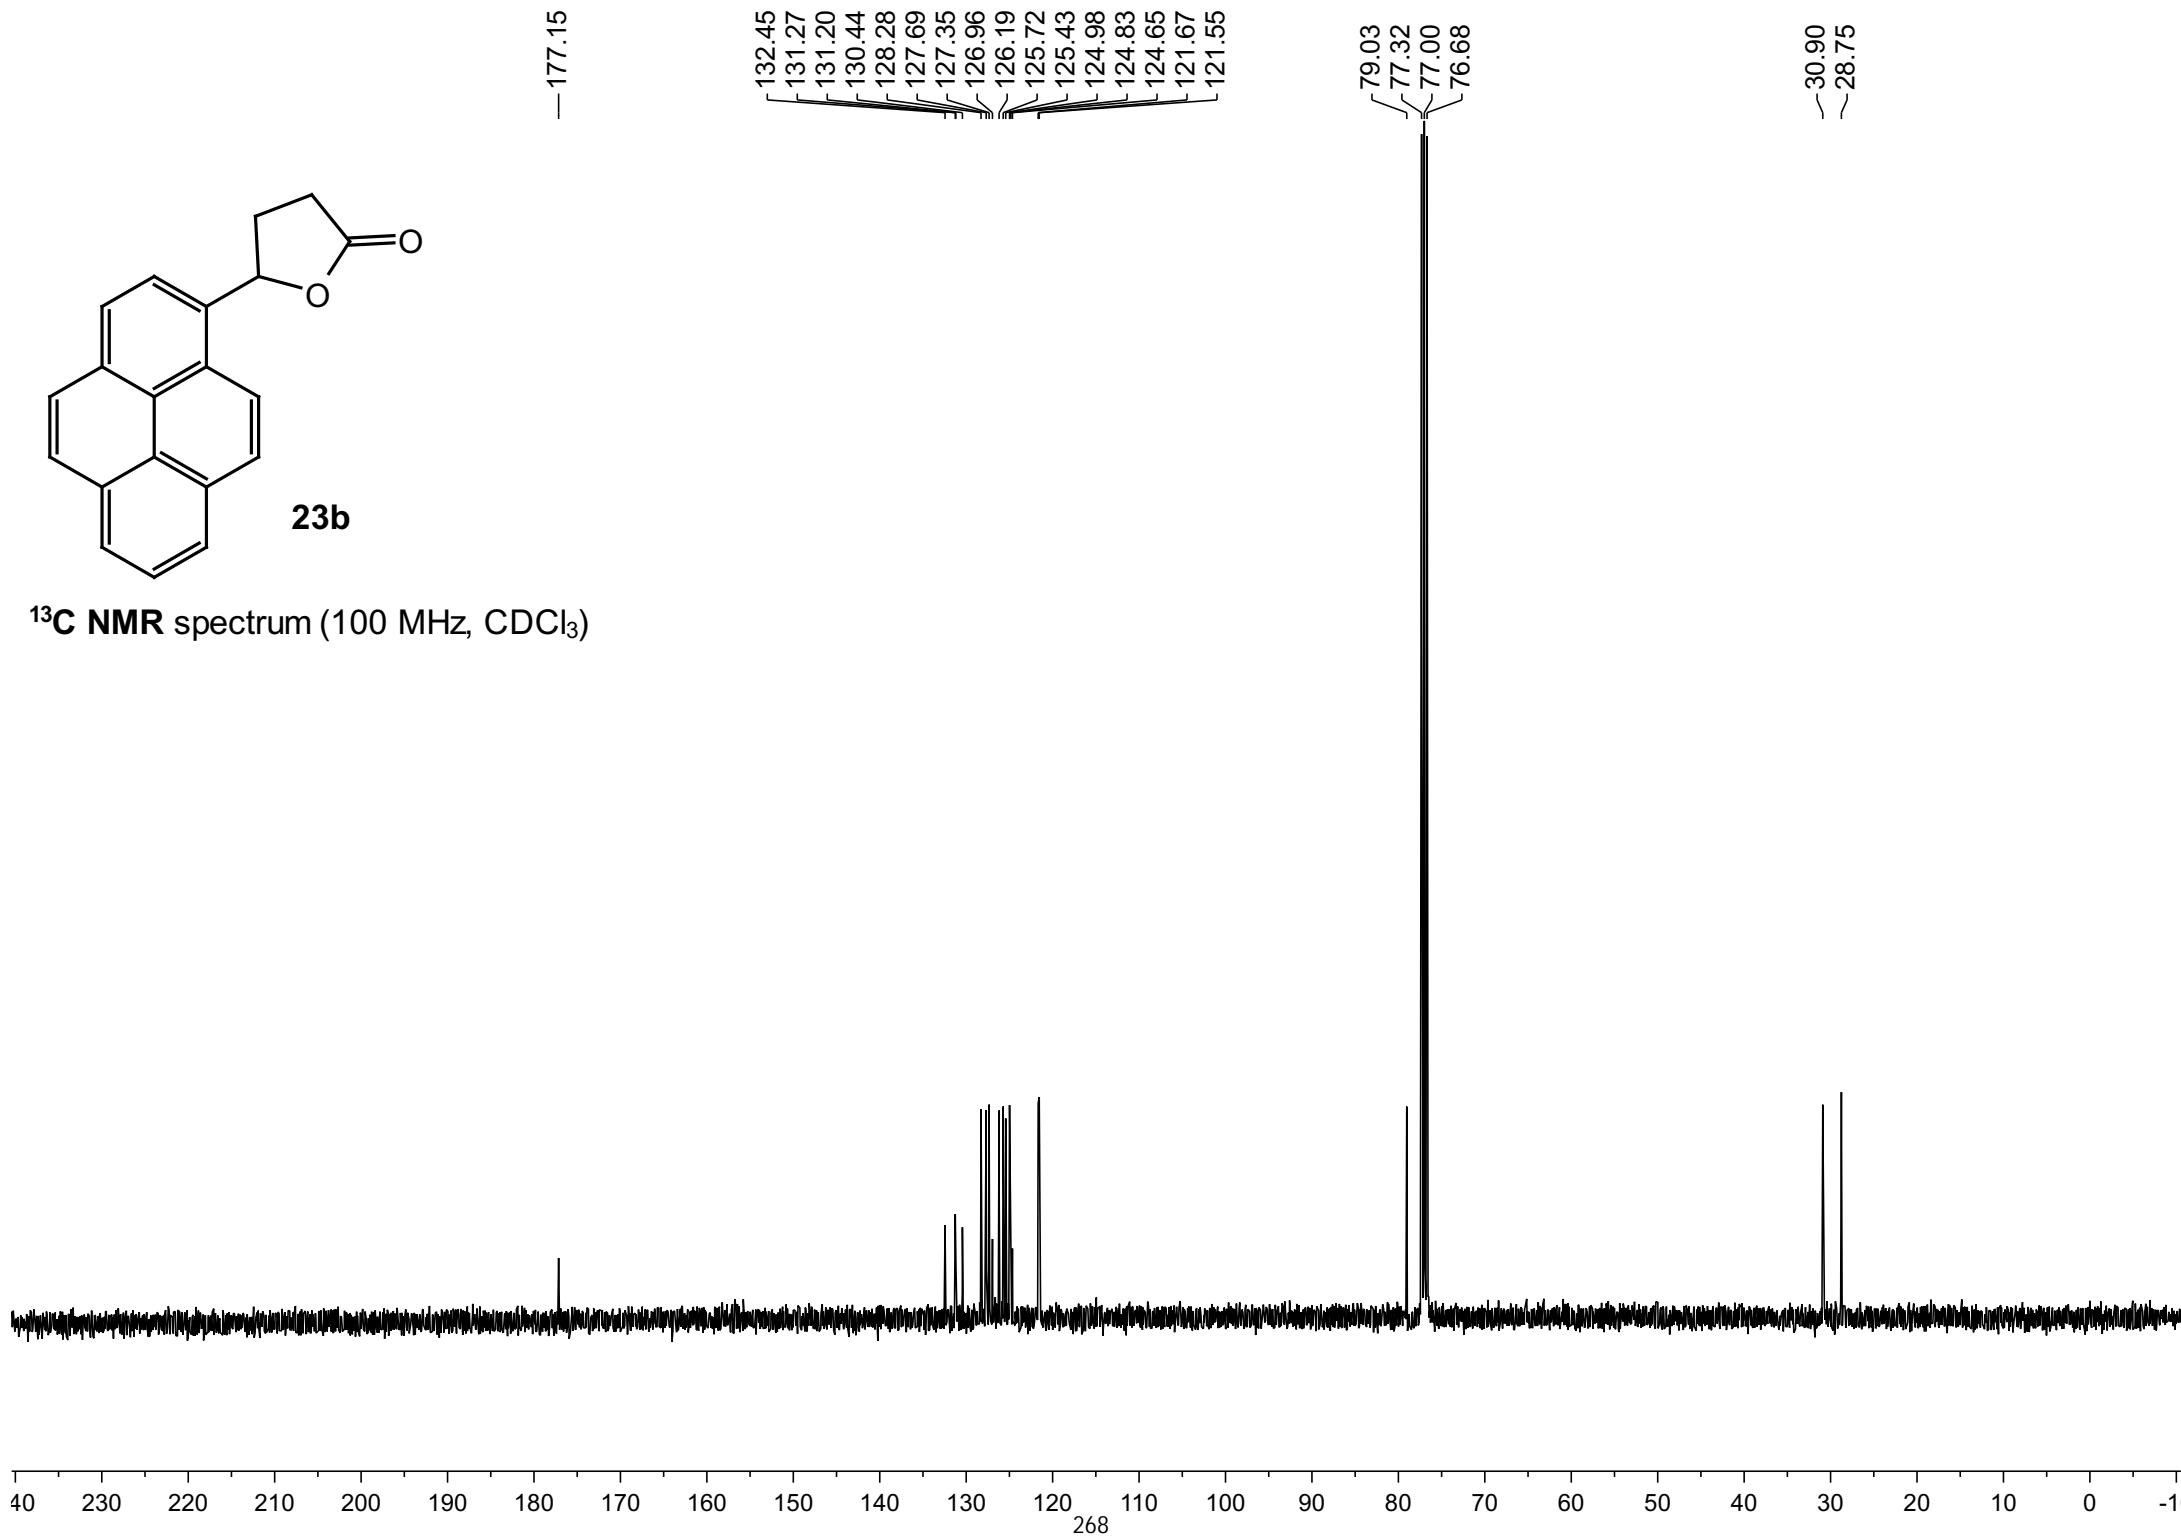

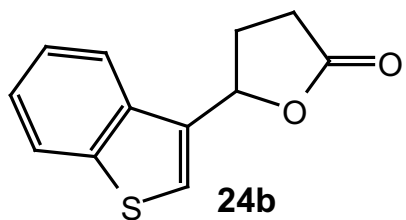

<sup>1</sup>H NMR spectrum (600 MHz, CDCl<sub>3</sub>)

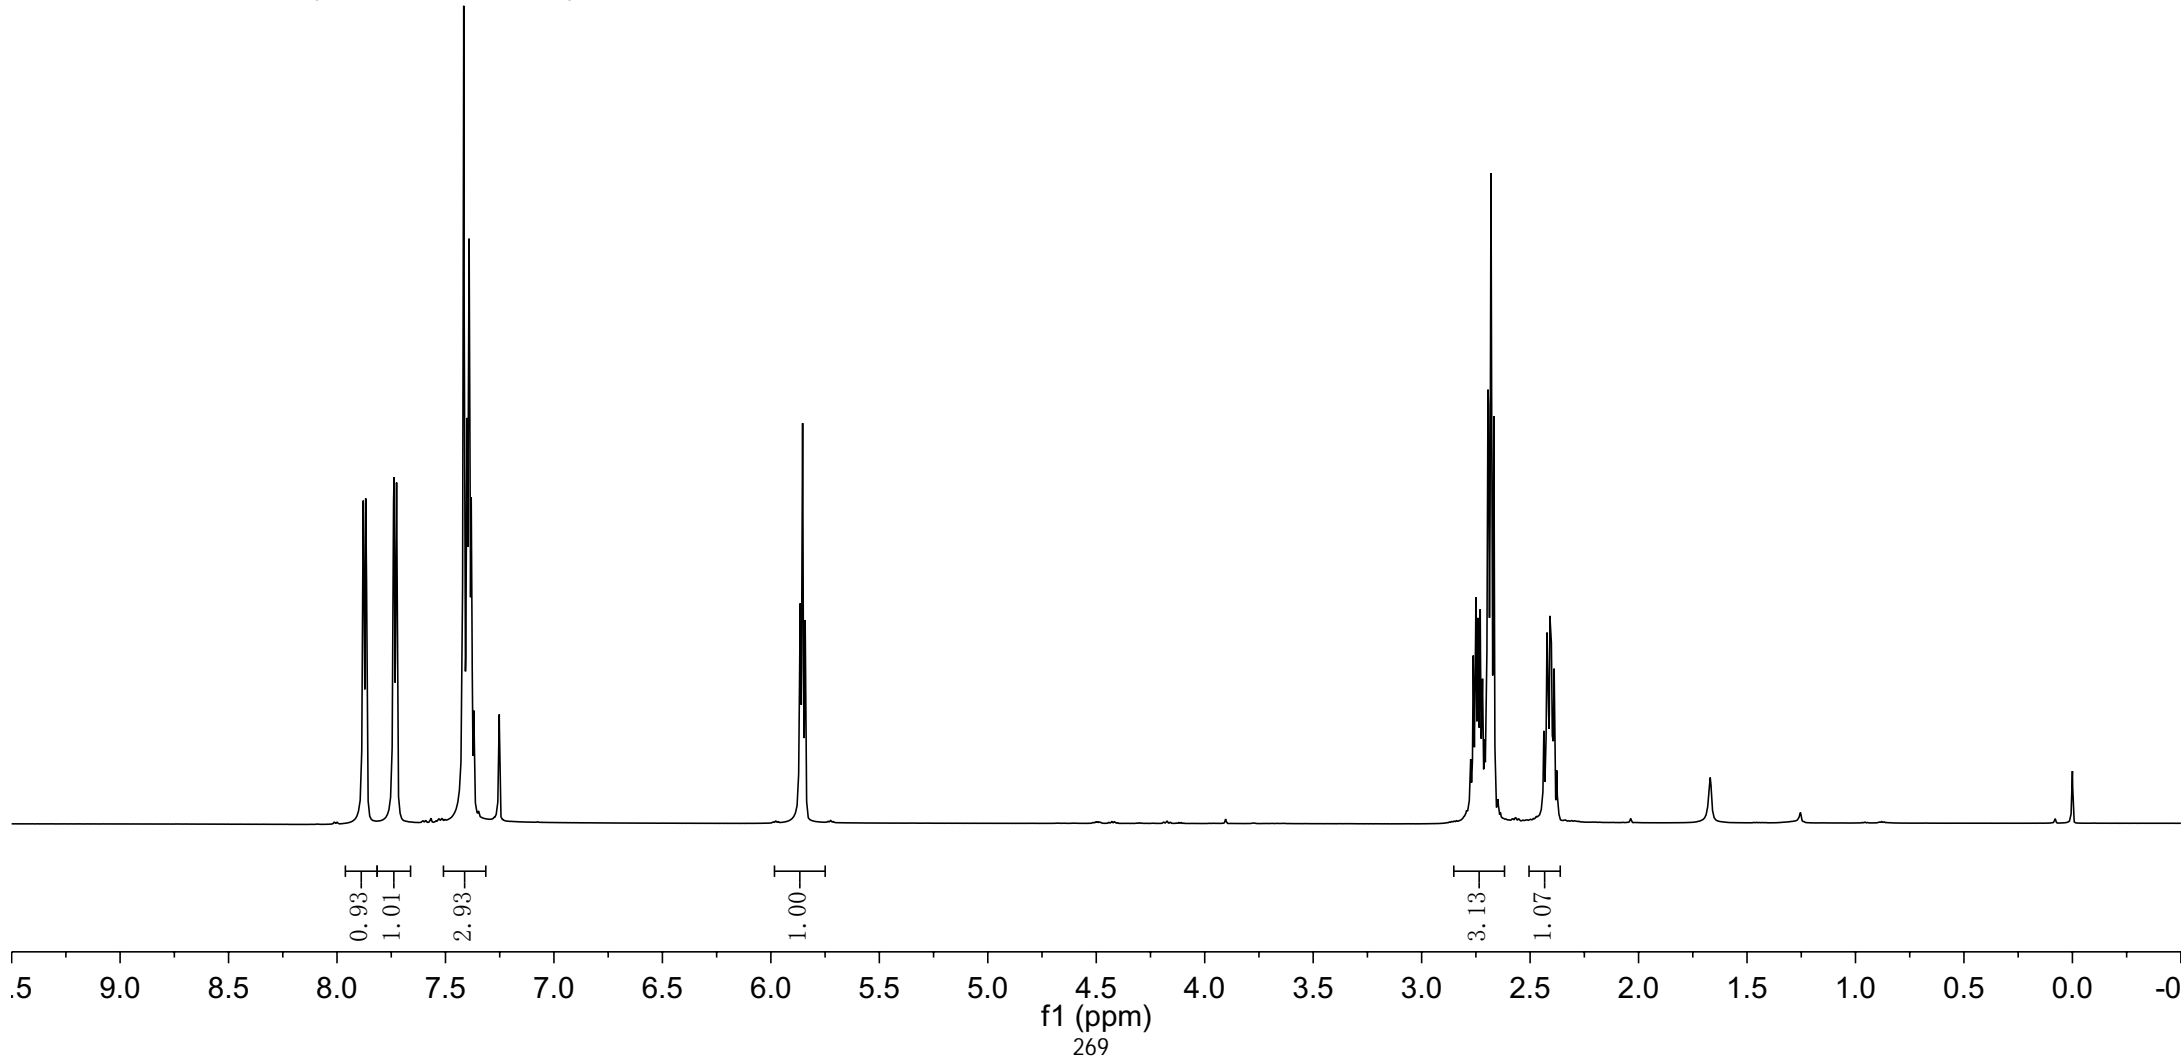

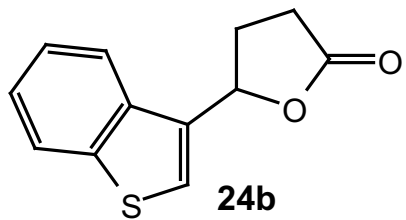

<sup>13</sup>C NMR spectrum (150 MHz, CDCl<sub>3</sub>)

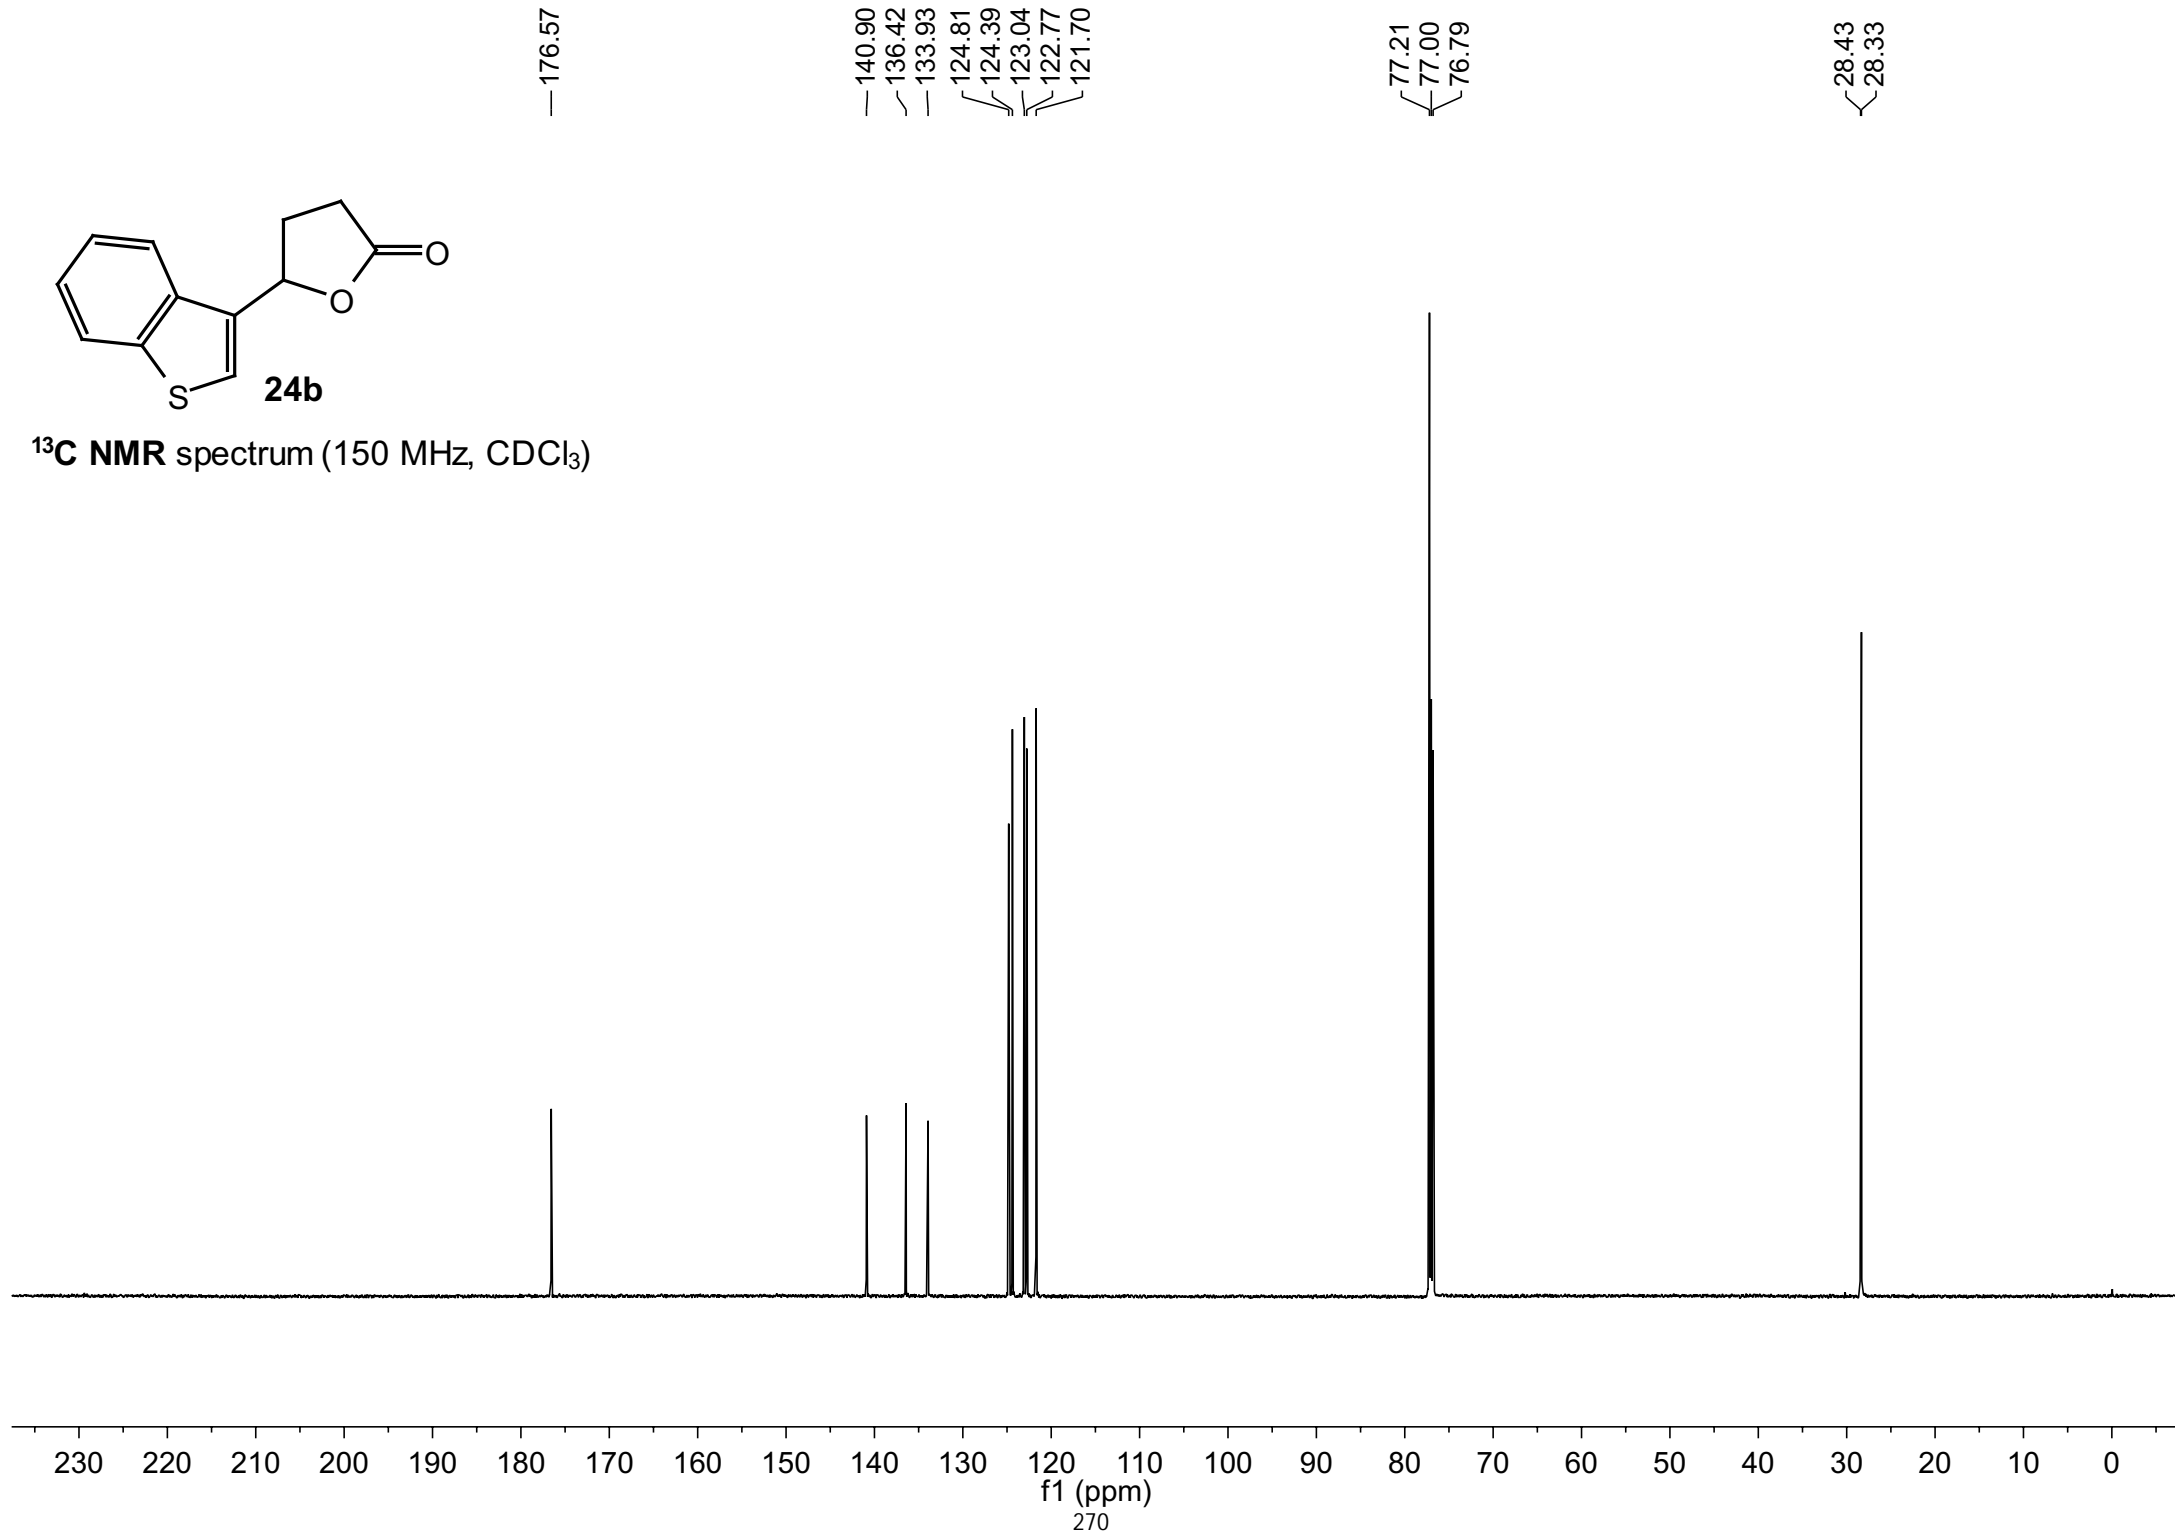

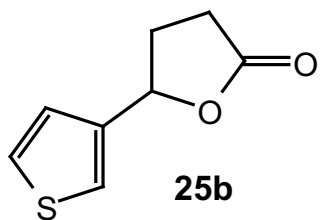

7.378  
7.373  
7.369  
7.364  
7.287  
7.282  
7.266  
7.073  
7.070  
7.064  
7.062

5.603  
5.592  
5.581

2.662  
2.657  
2.648  
2.641  
2.636  
2.626  
2.313  
2.298  
2.294  
2.292  
2.285  
2.282  
2.279  
2.276  
2.272  
2.264  
2.259  
2.251  
2.248

0.000

<sup>1</sup>H NMR spectrum (600 MHz, CDCl<sub>3</sub>)

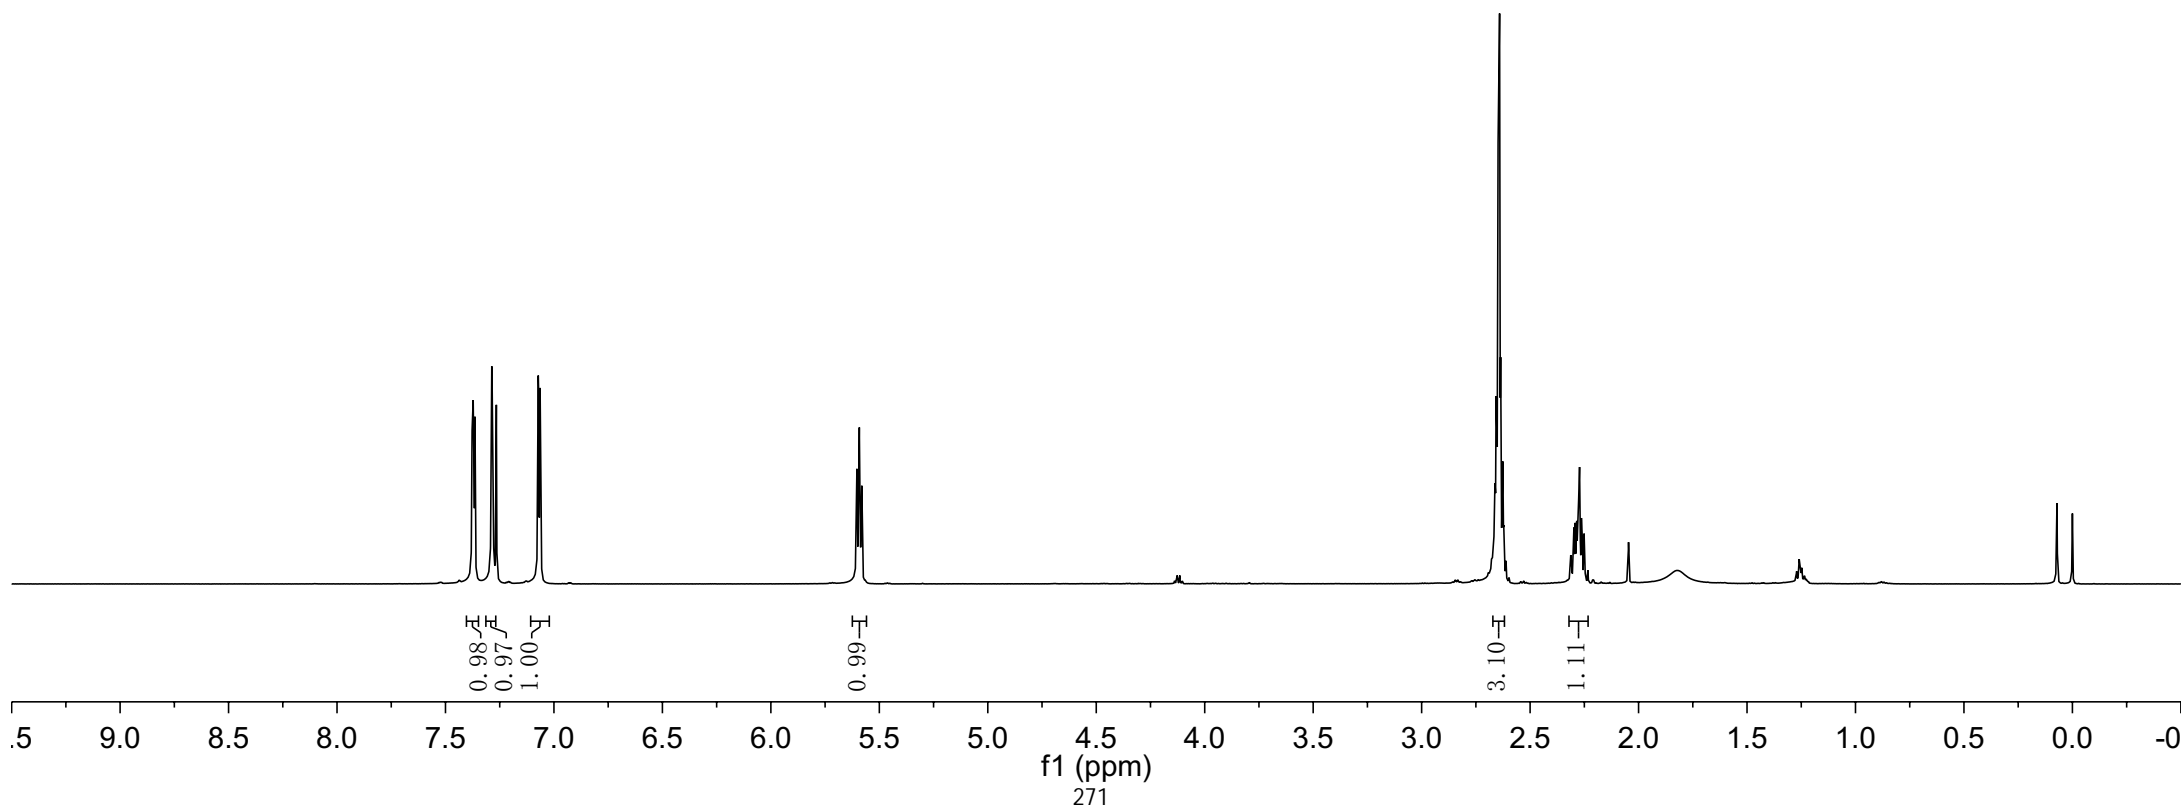

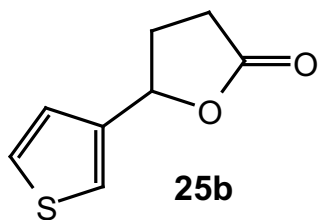

<sup>13</sup>C NMR spectrum (150 MHz, CDCl<sub>3</sub>)

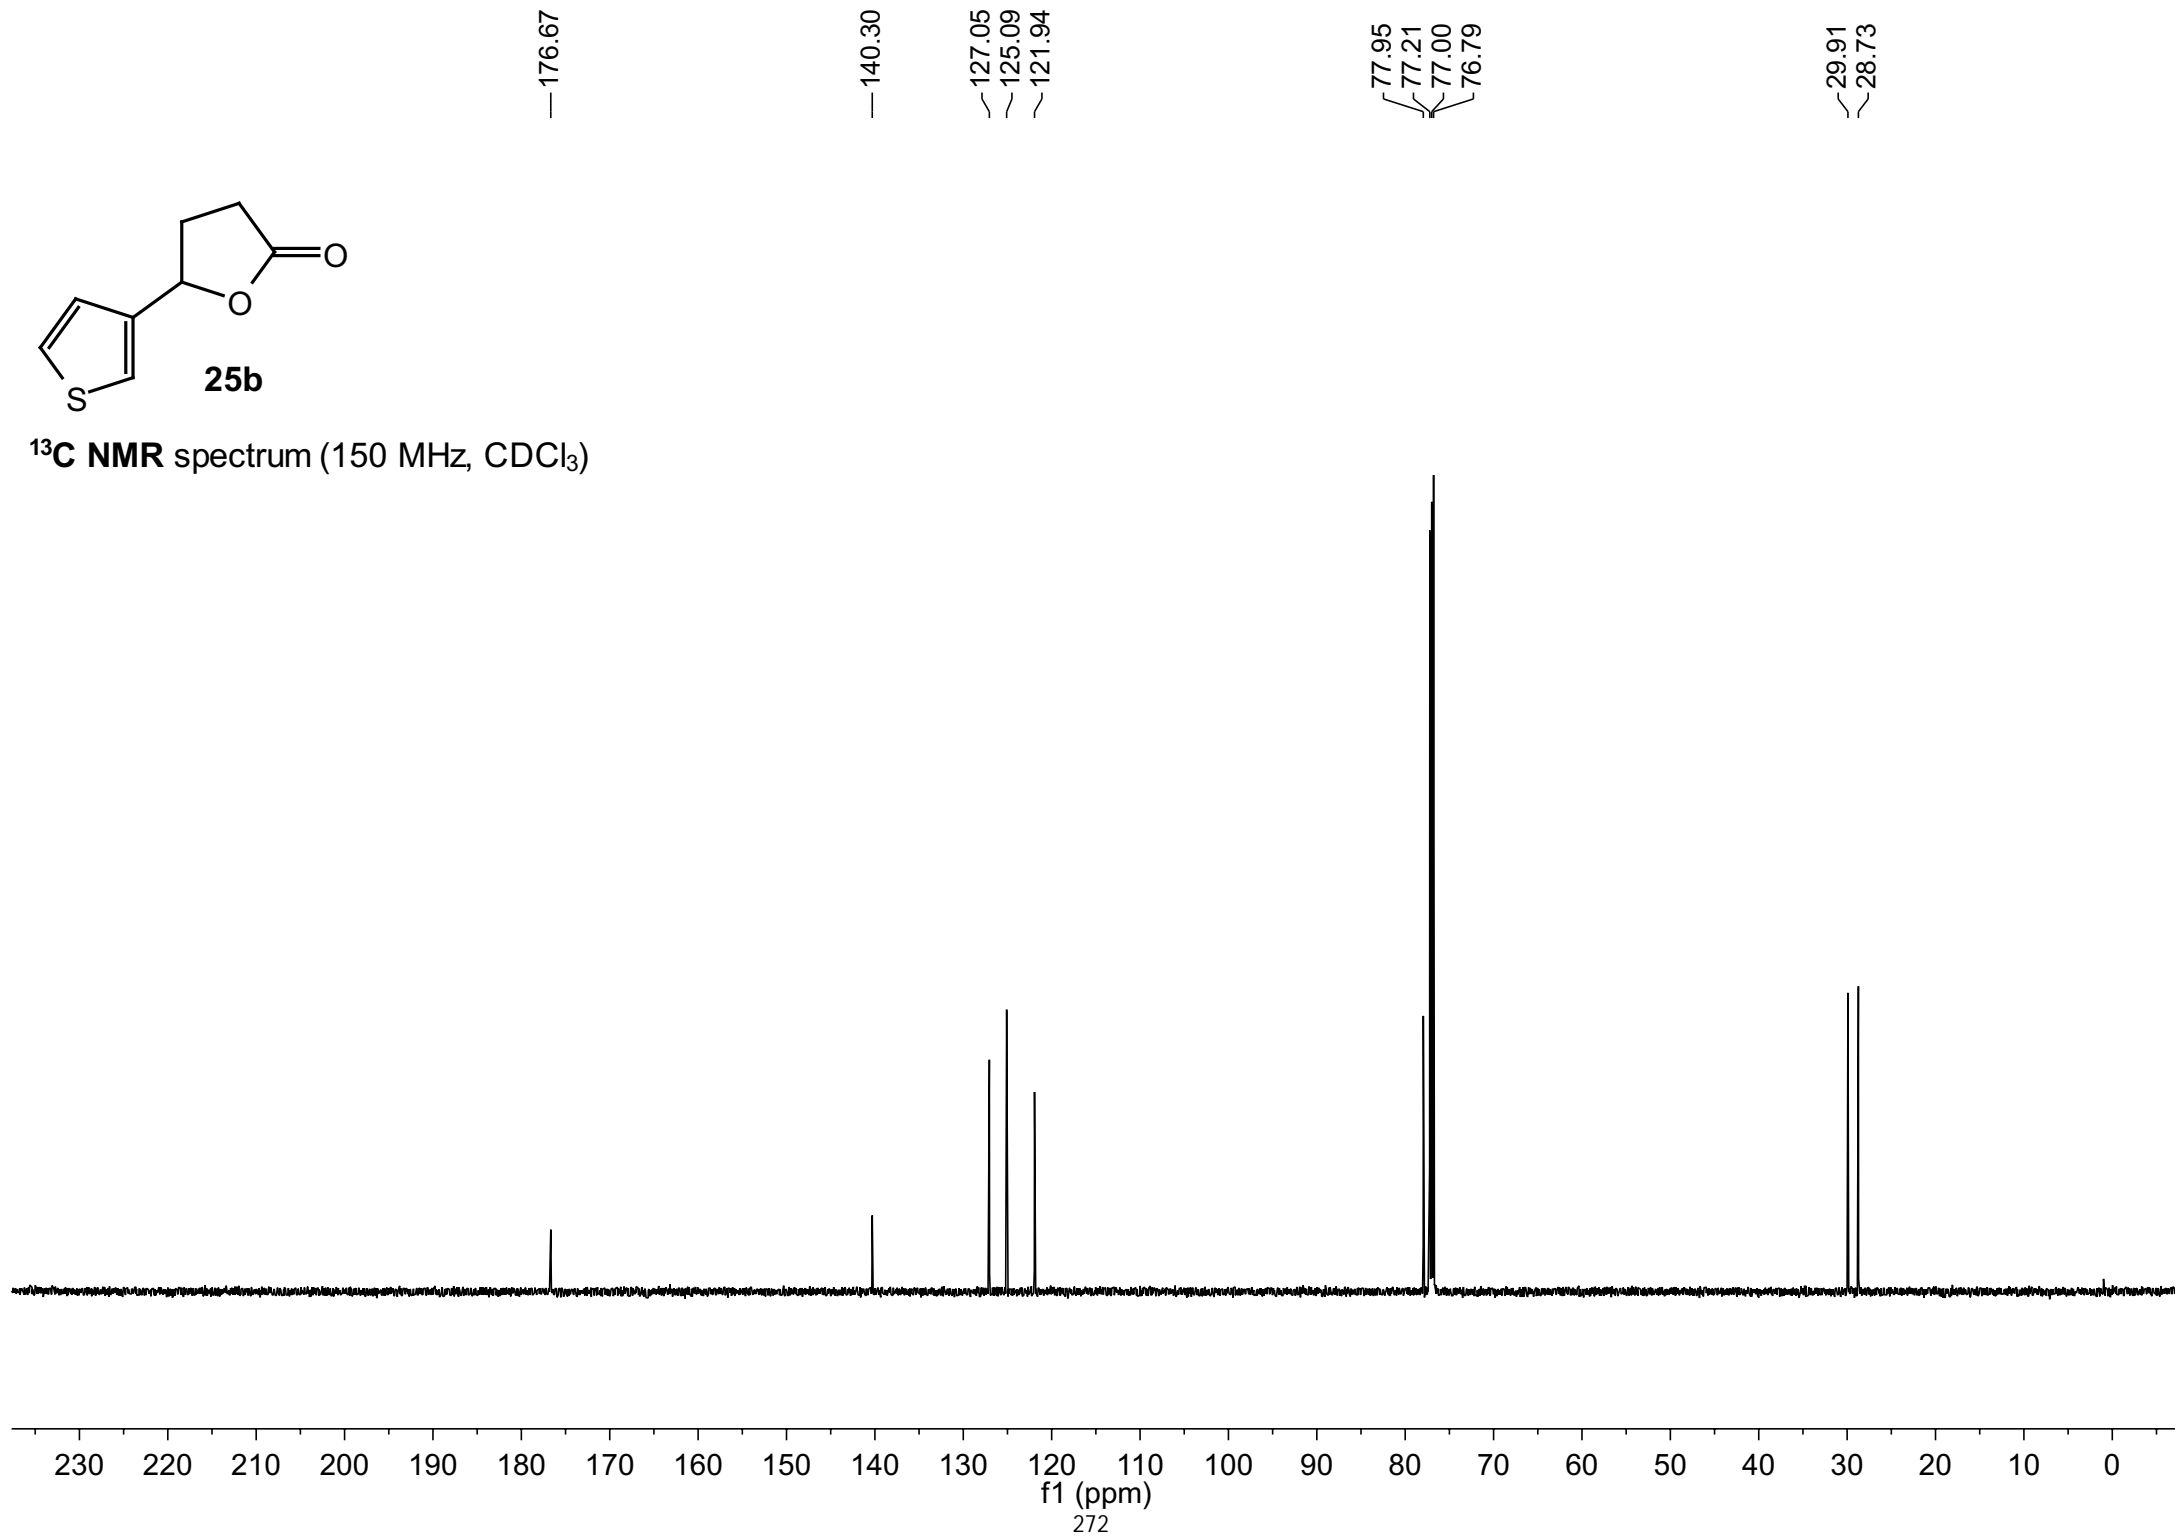

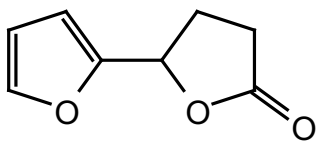

**26b**

<sup>1</sup>H NMR spectrum (600 MHz, CDCl<sub>3</sub>)

7.344  
7.335  
7.267  
7.098  
7.092  
7.017  
7.010  
7.008  
7.002

5.738  
5.733  
5.726  
5.715

2.740  
2.727  
2.723  
2.716  
2.708  
2.706  
2.701  
2.691  
2.685  
2.682  
2.677  
2.669  
2.663  
2.646  
2.633  
2.616  
2.422  
2.417  
2.408  
2.403  
2.398  
2.390  
2.387  
2.382  
2.375  
2.370  
2.364  
2.344

—0.000

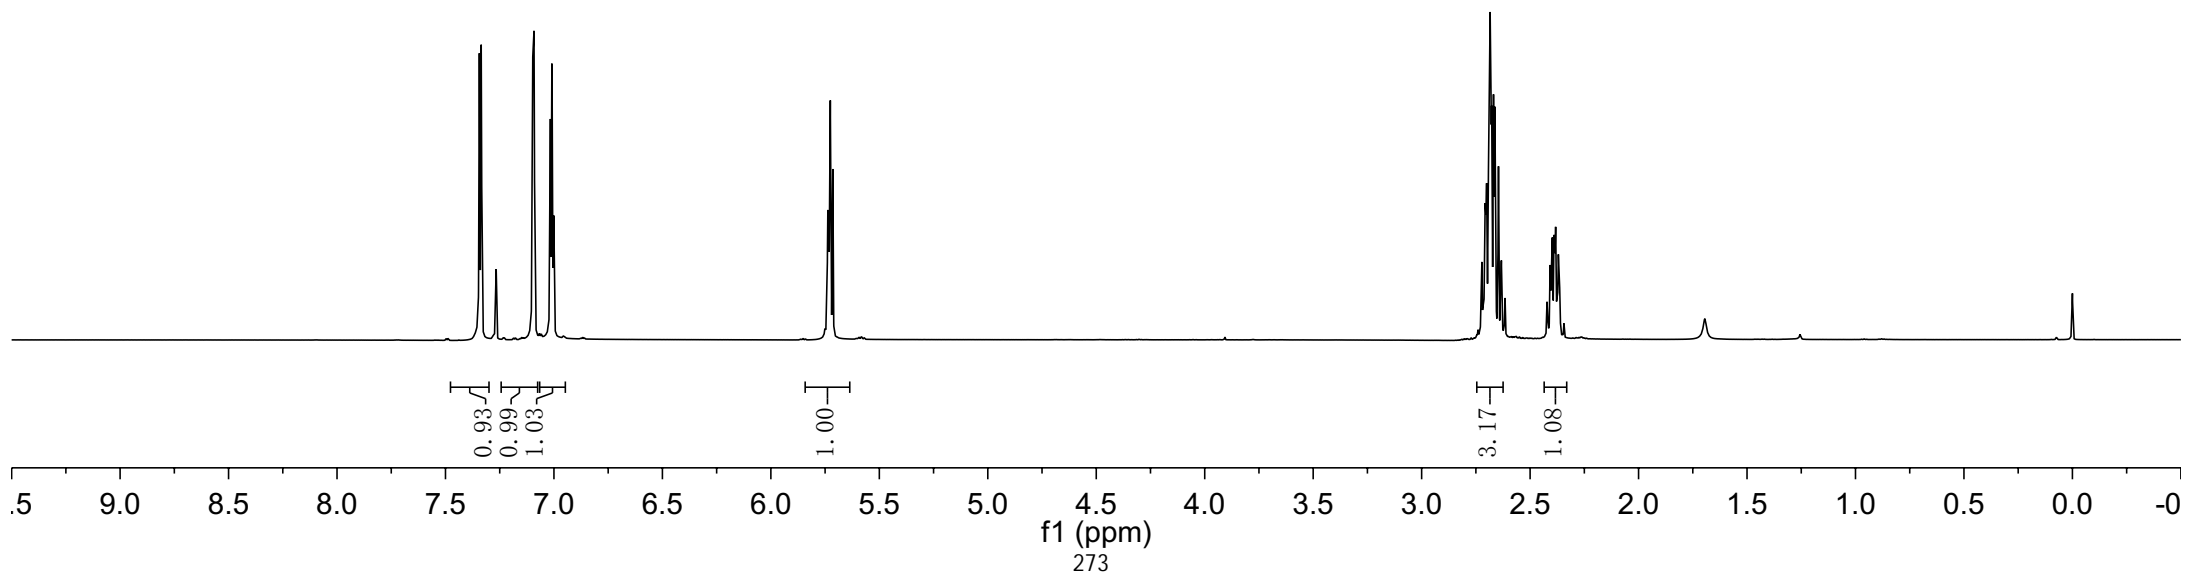

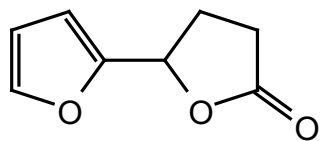

**26b**

<sup>13</sup>C NMR spectrum (150 MHz, CDCl<sub>3</sub>)

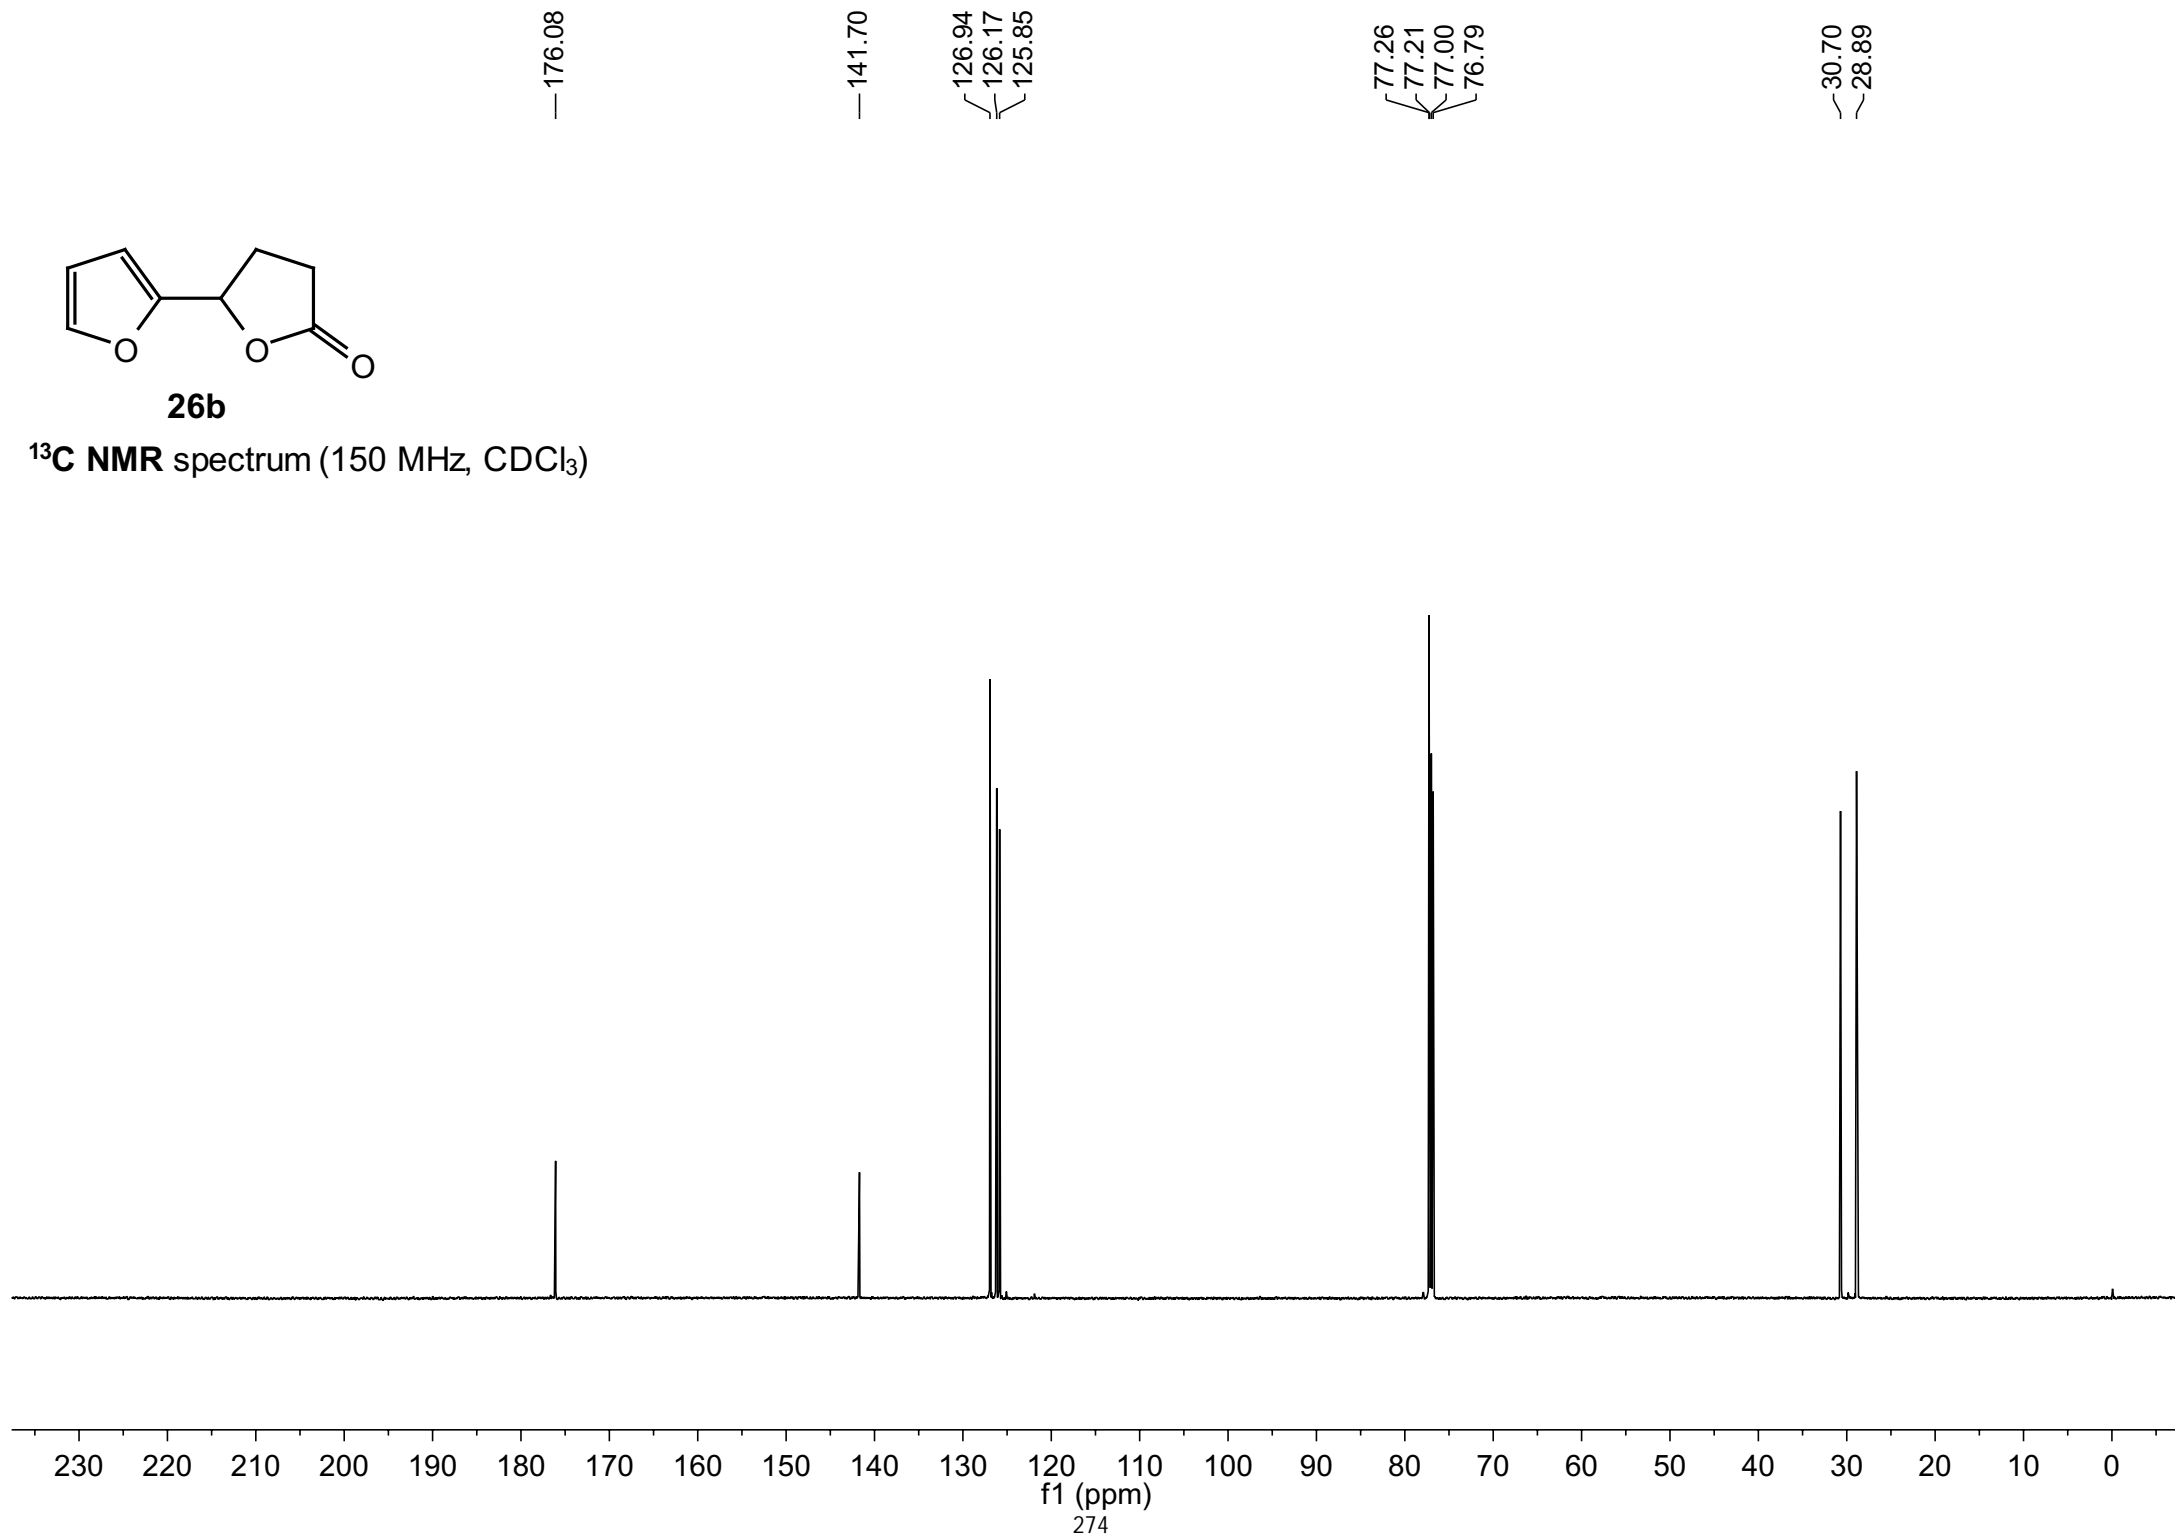

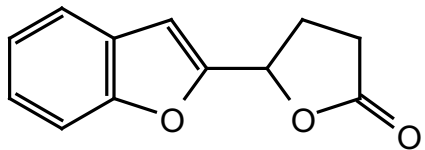

**27b**

<sup>1</sup>H NMR spectrum (600 MHz, CDCl<sub>3</sub>)

7.567  
7.554  
7.471  
7.458  
7.324  
7.312  
7.300  
7.251  
7.239  
7.226  
—6.765

5.632  
5.621  
5.610

2.835  
2.825  
2.809  
2.807  
2.797  
2.791  
2.776  
2.679  
2.667  
2.664  
2.652  
2.639  
2.635  
2.631  
2.629  
2.619  
2.617  
2.606  
2.603  
2.594  
2.591  
2.582  
2.576  
2.572  
2.560  
2.550  
2.539

—0.000

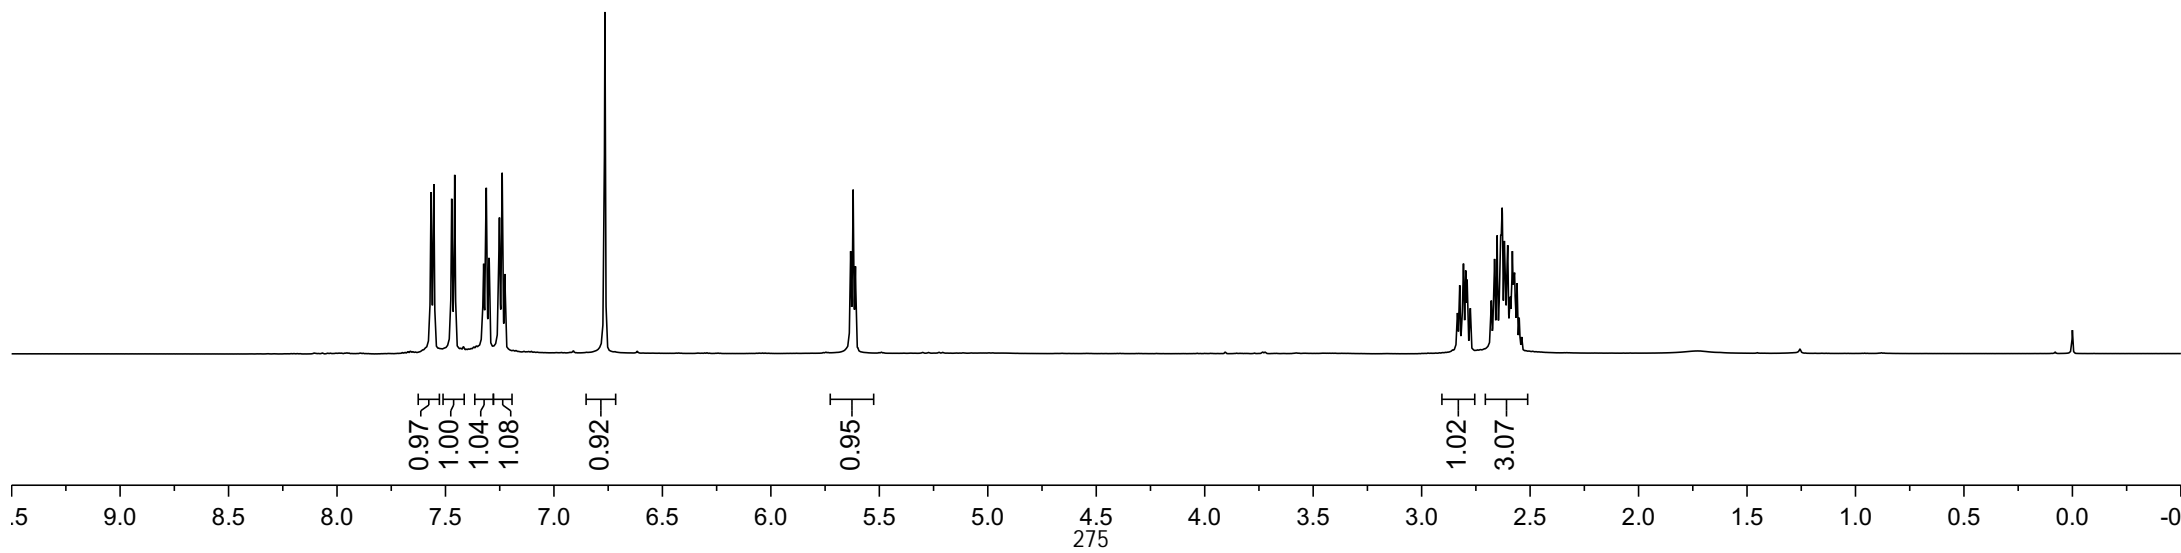



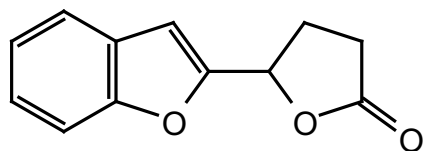

**27b**

<sup>13</sup>C NMR spectrum (150 MHz, CDCl<sub>3</sub>)

— 176.30

~ 155.12  
~ 153.44

~ 127.42  
~ 125.06  
~ 123.11  
~ 121.41

— 111.39  
— 105.45

~ 77.21  
~ 77.00  
~ 76.79  
~ 74.57

~ 28.07  
~ 26.60

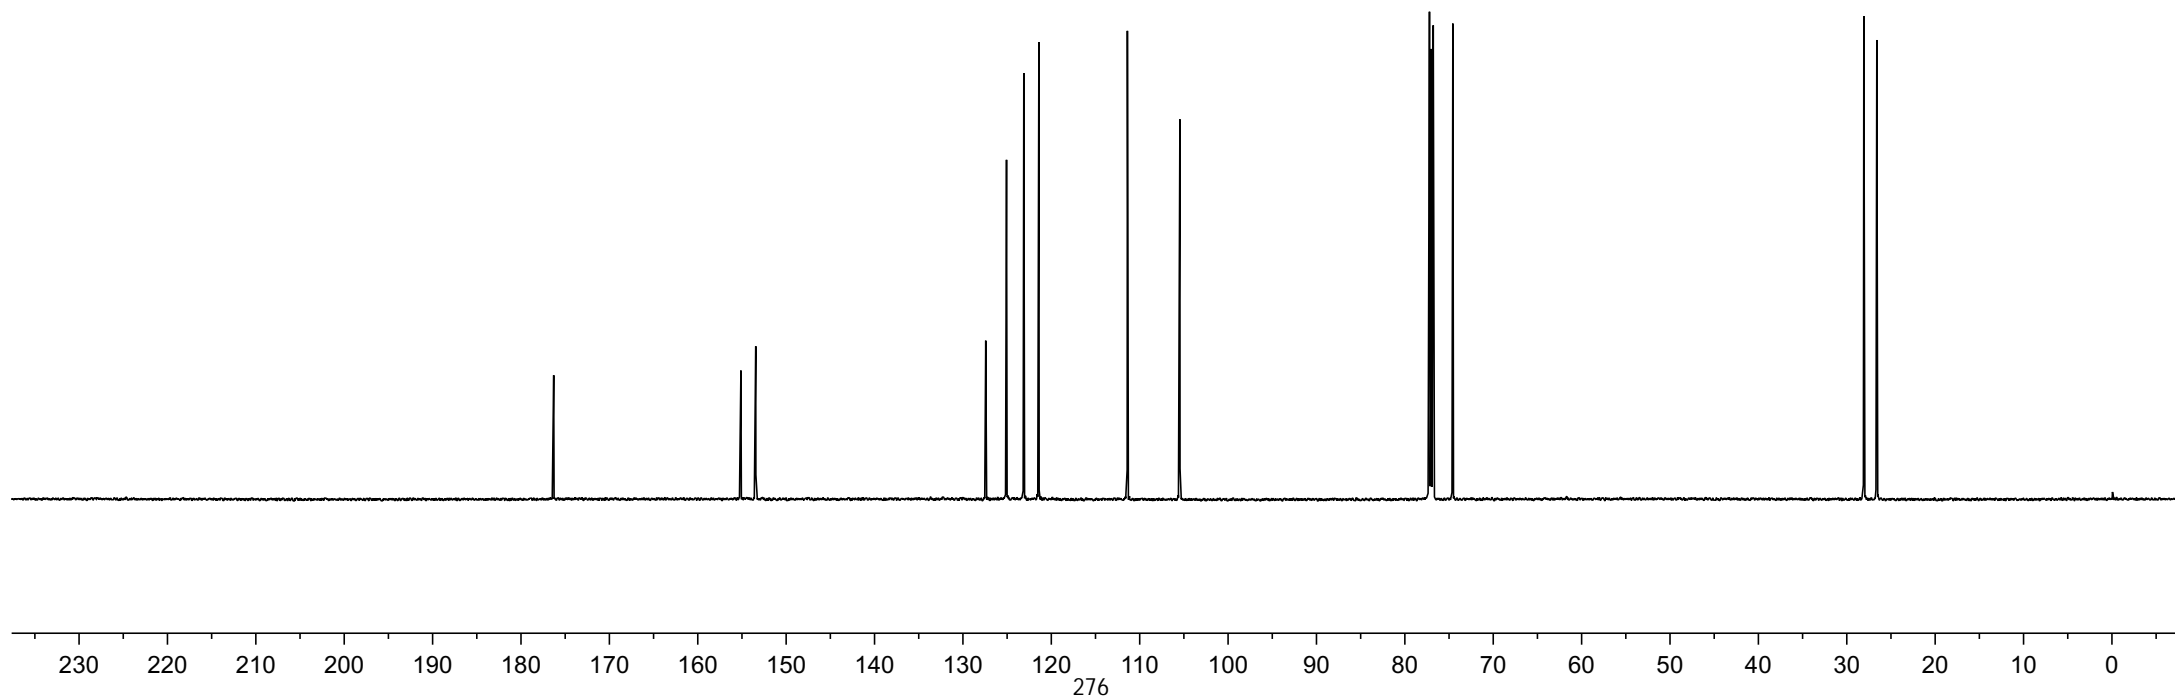

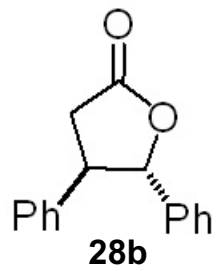

<sup>1</sup>H NMR spectrum (600 MHz, CDCl<sub>3</sub>)

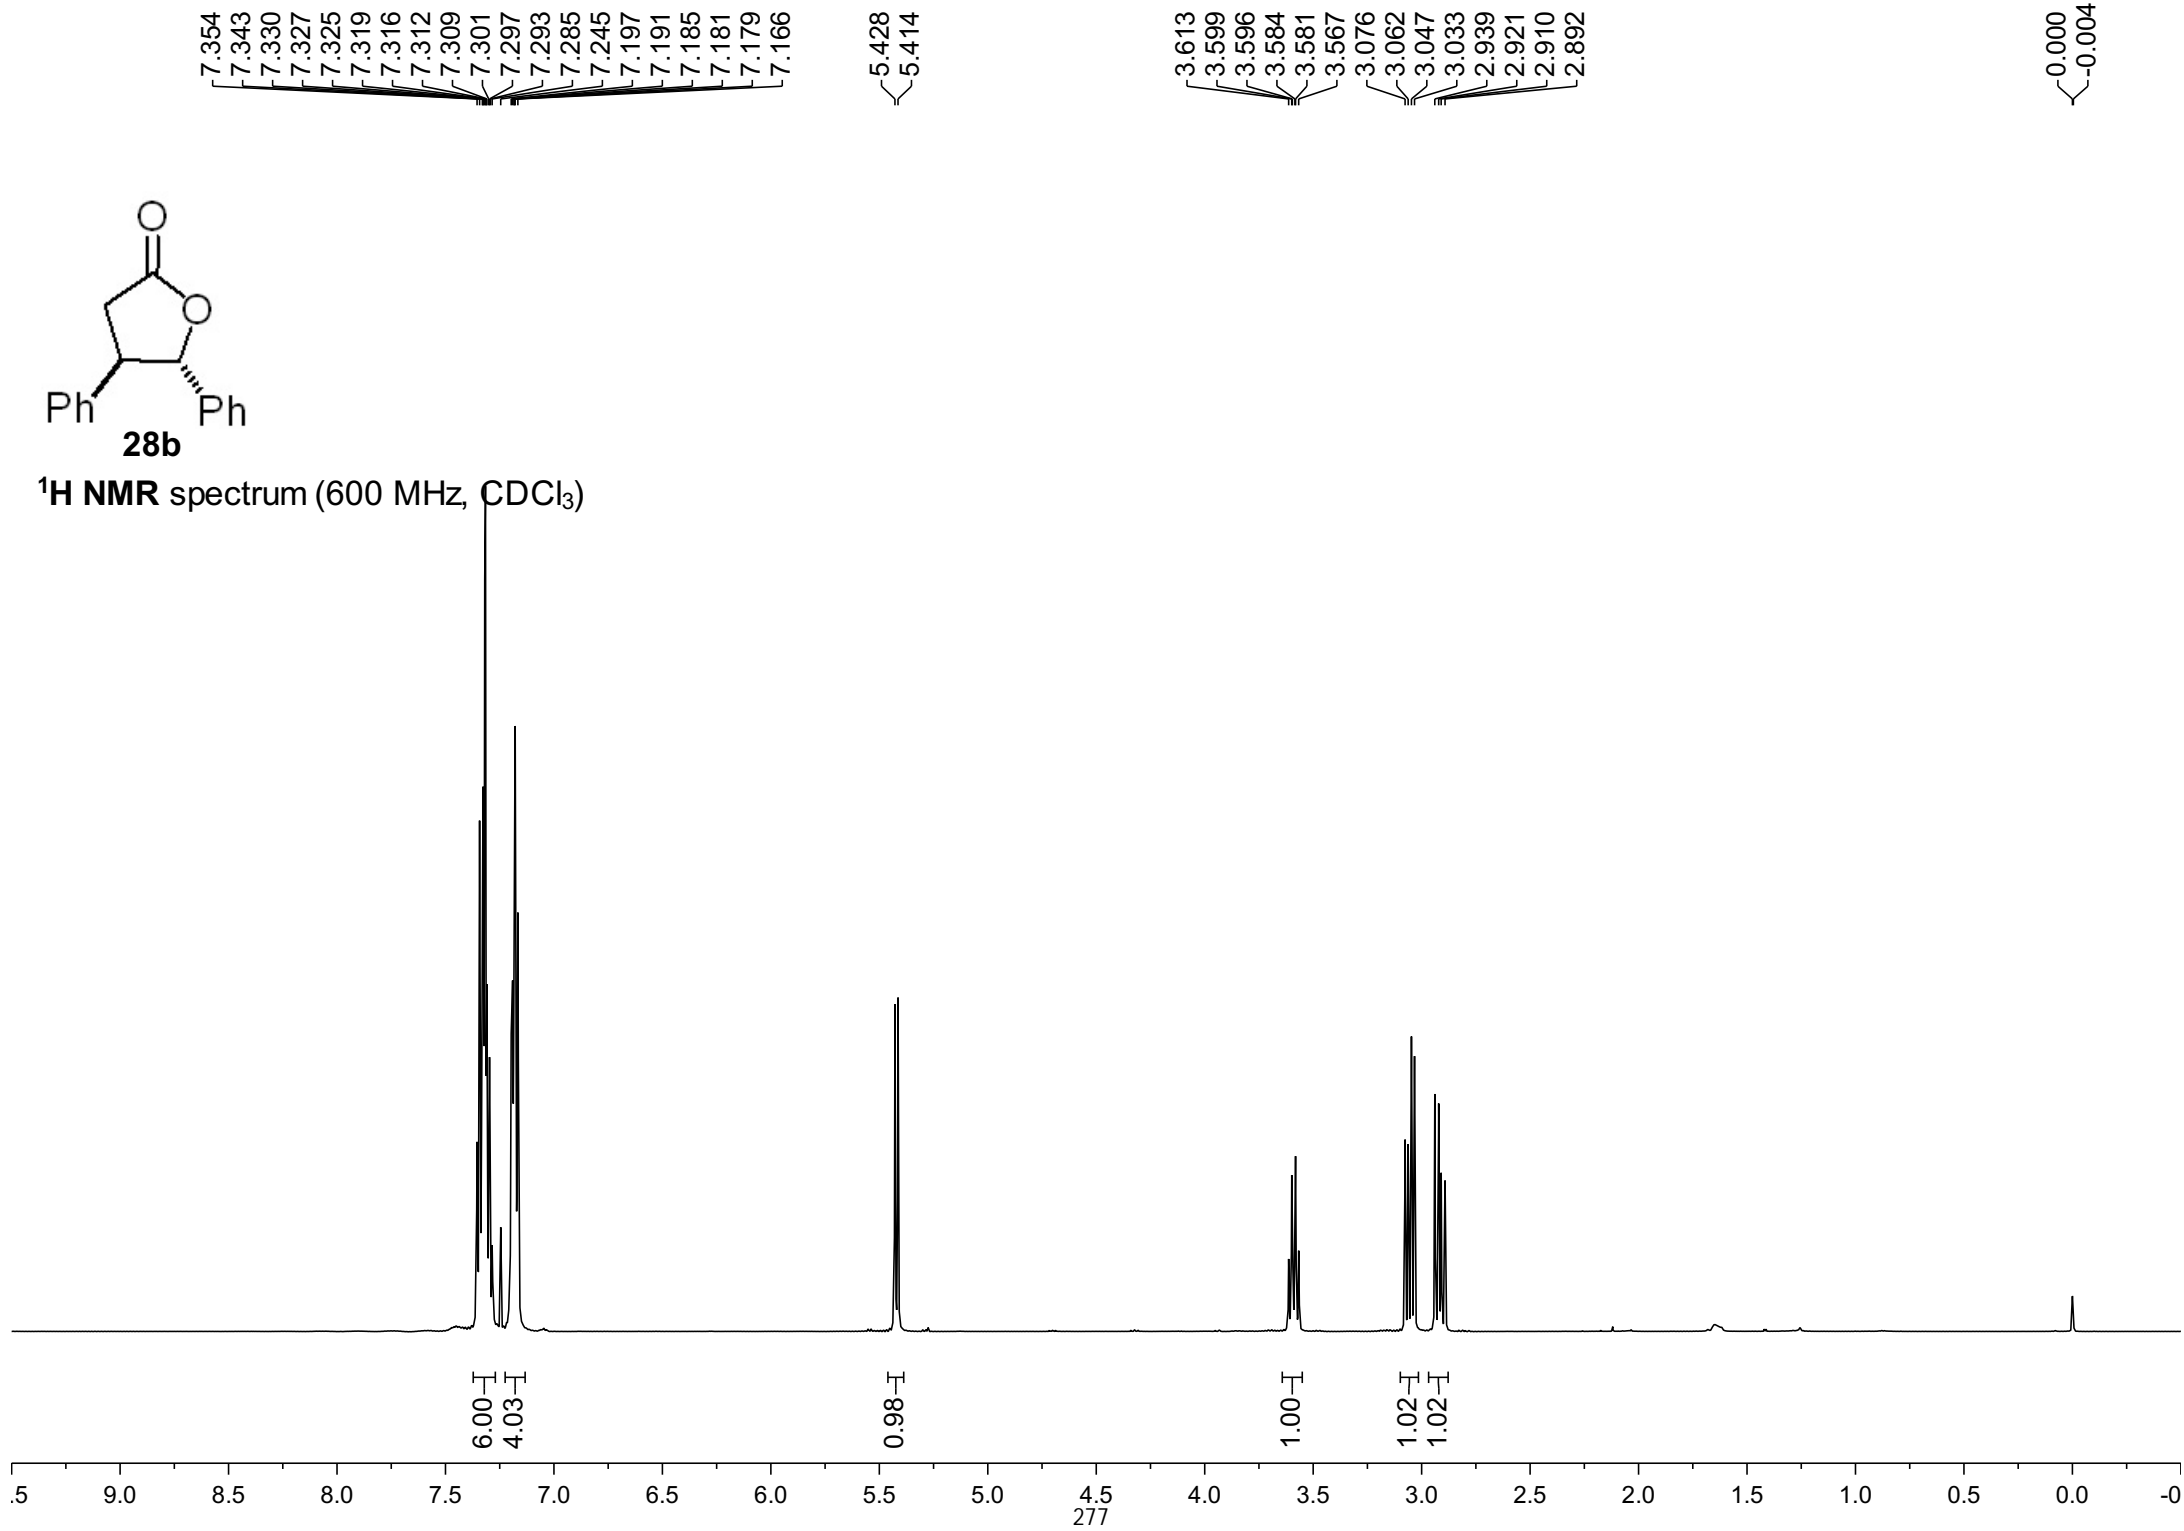

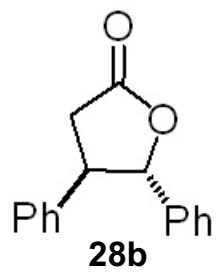

<sup>13</sup>C NMR spectrum (150 MHz, CDCl<sub>3</sub>)

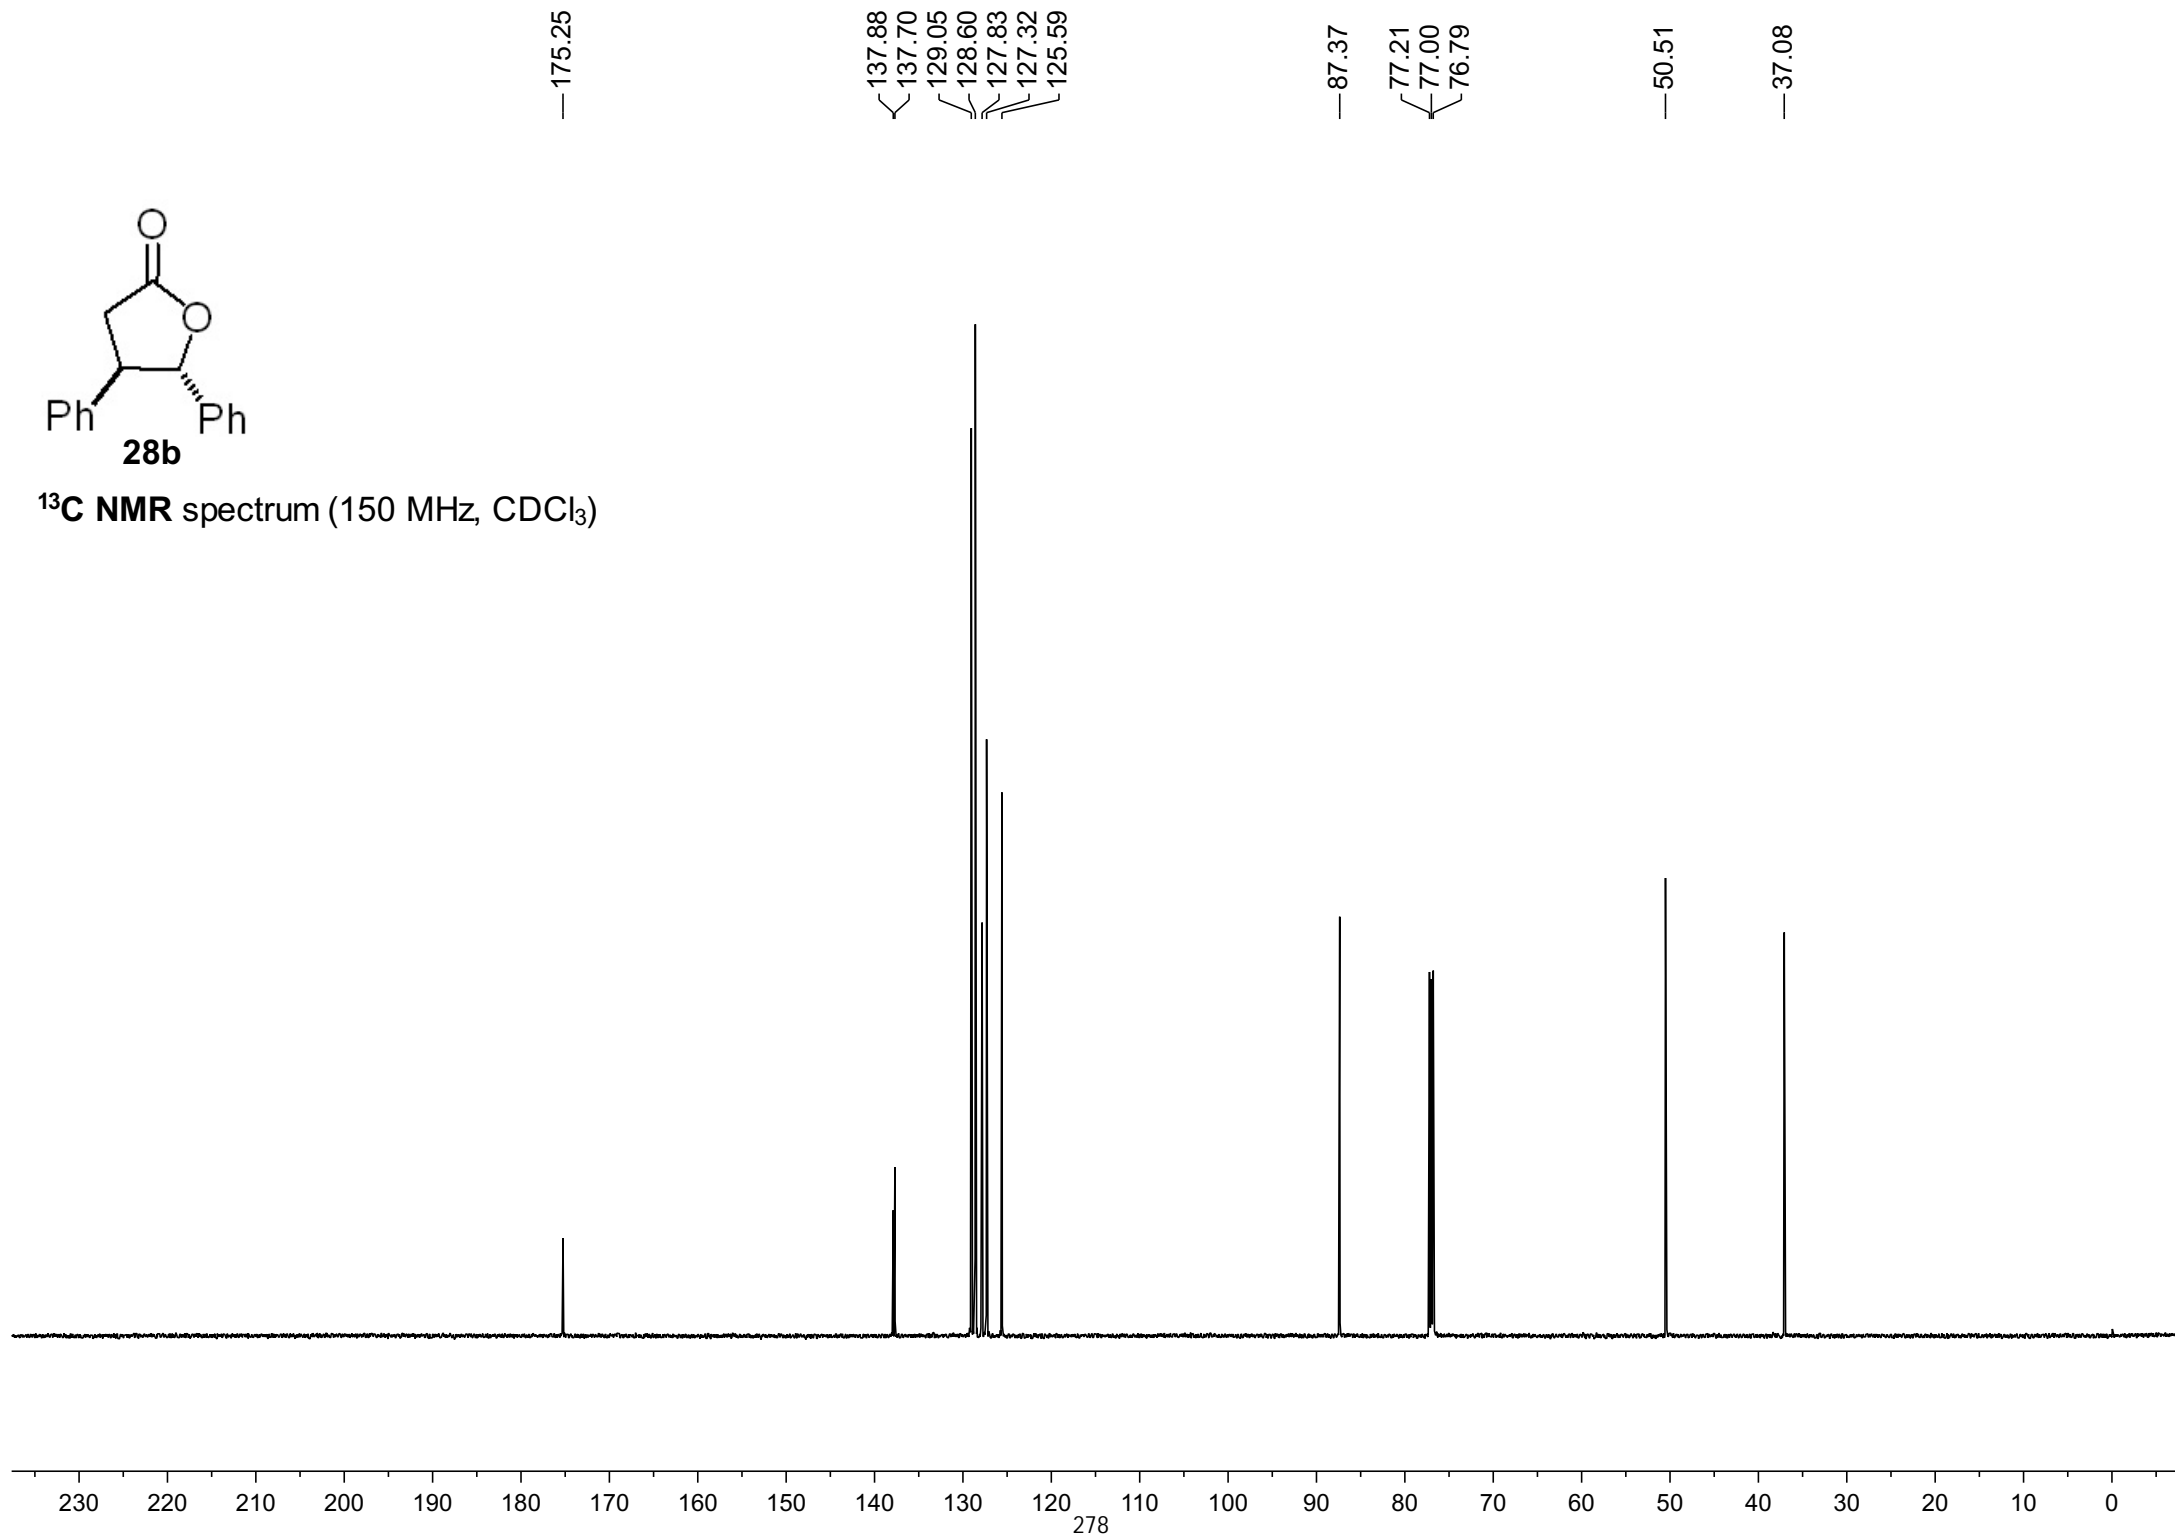

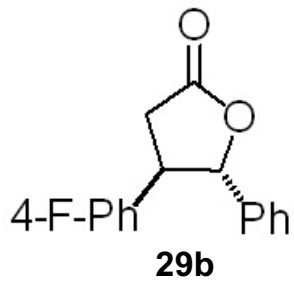

<sup>1</sup>H NMR spectrum (600 MHz, CDCl<sub>3</sub>)

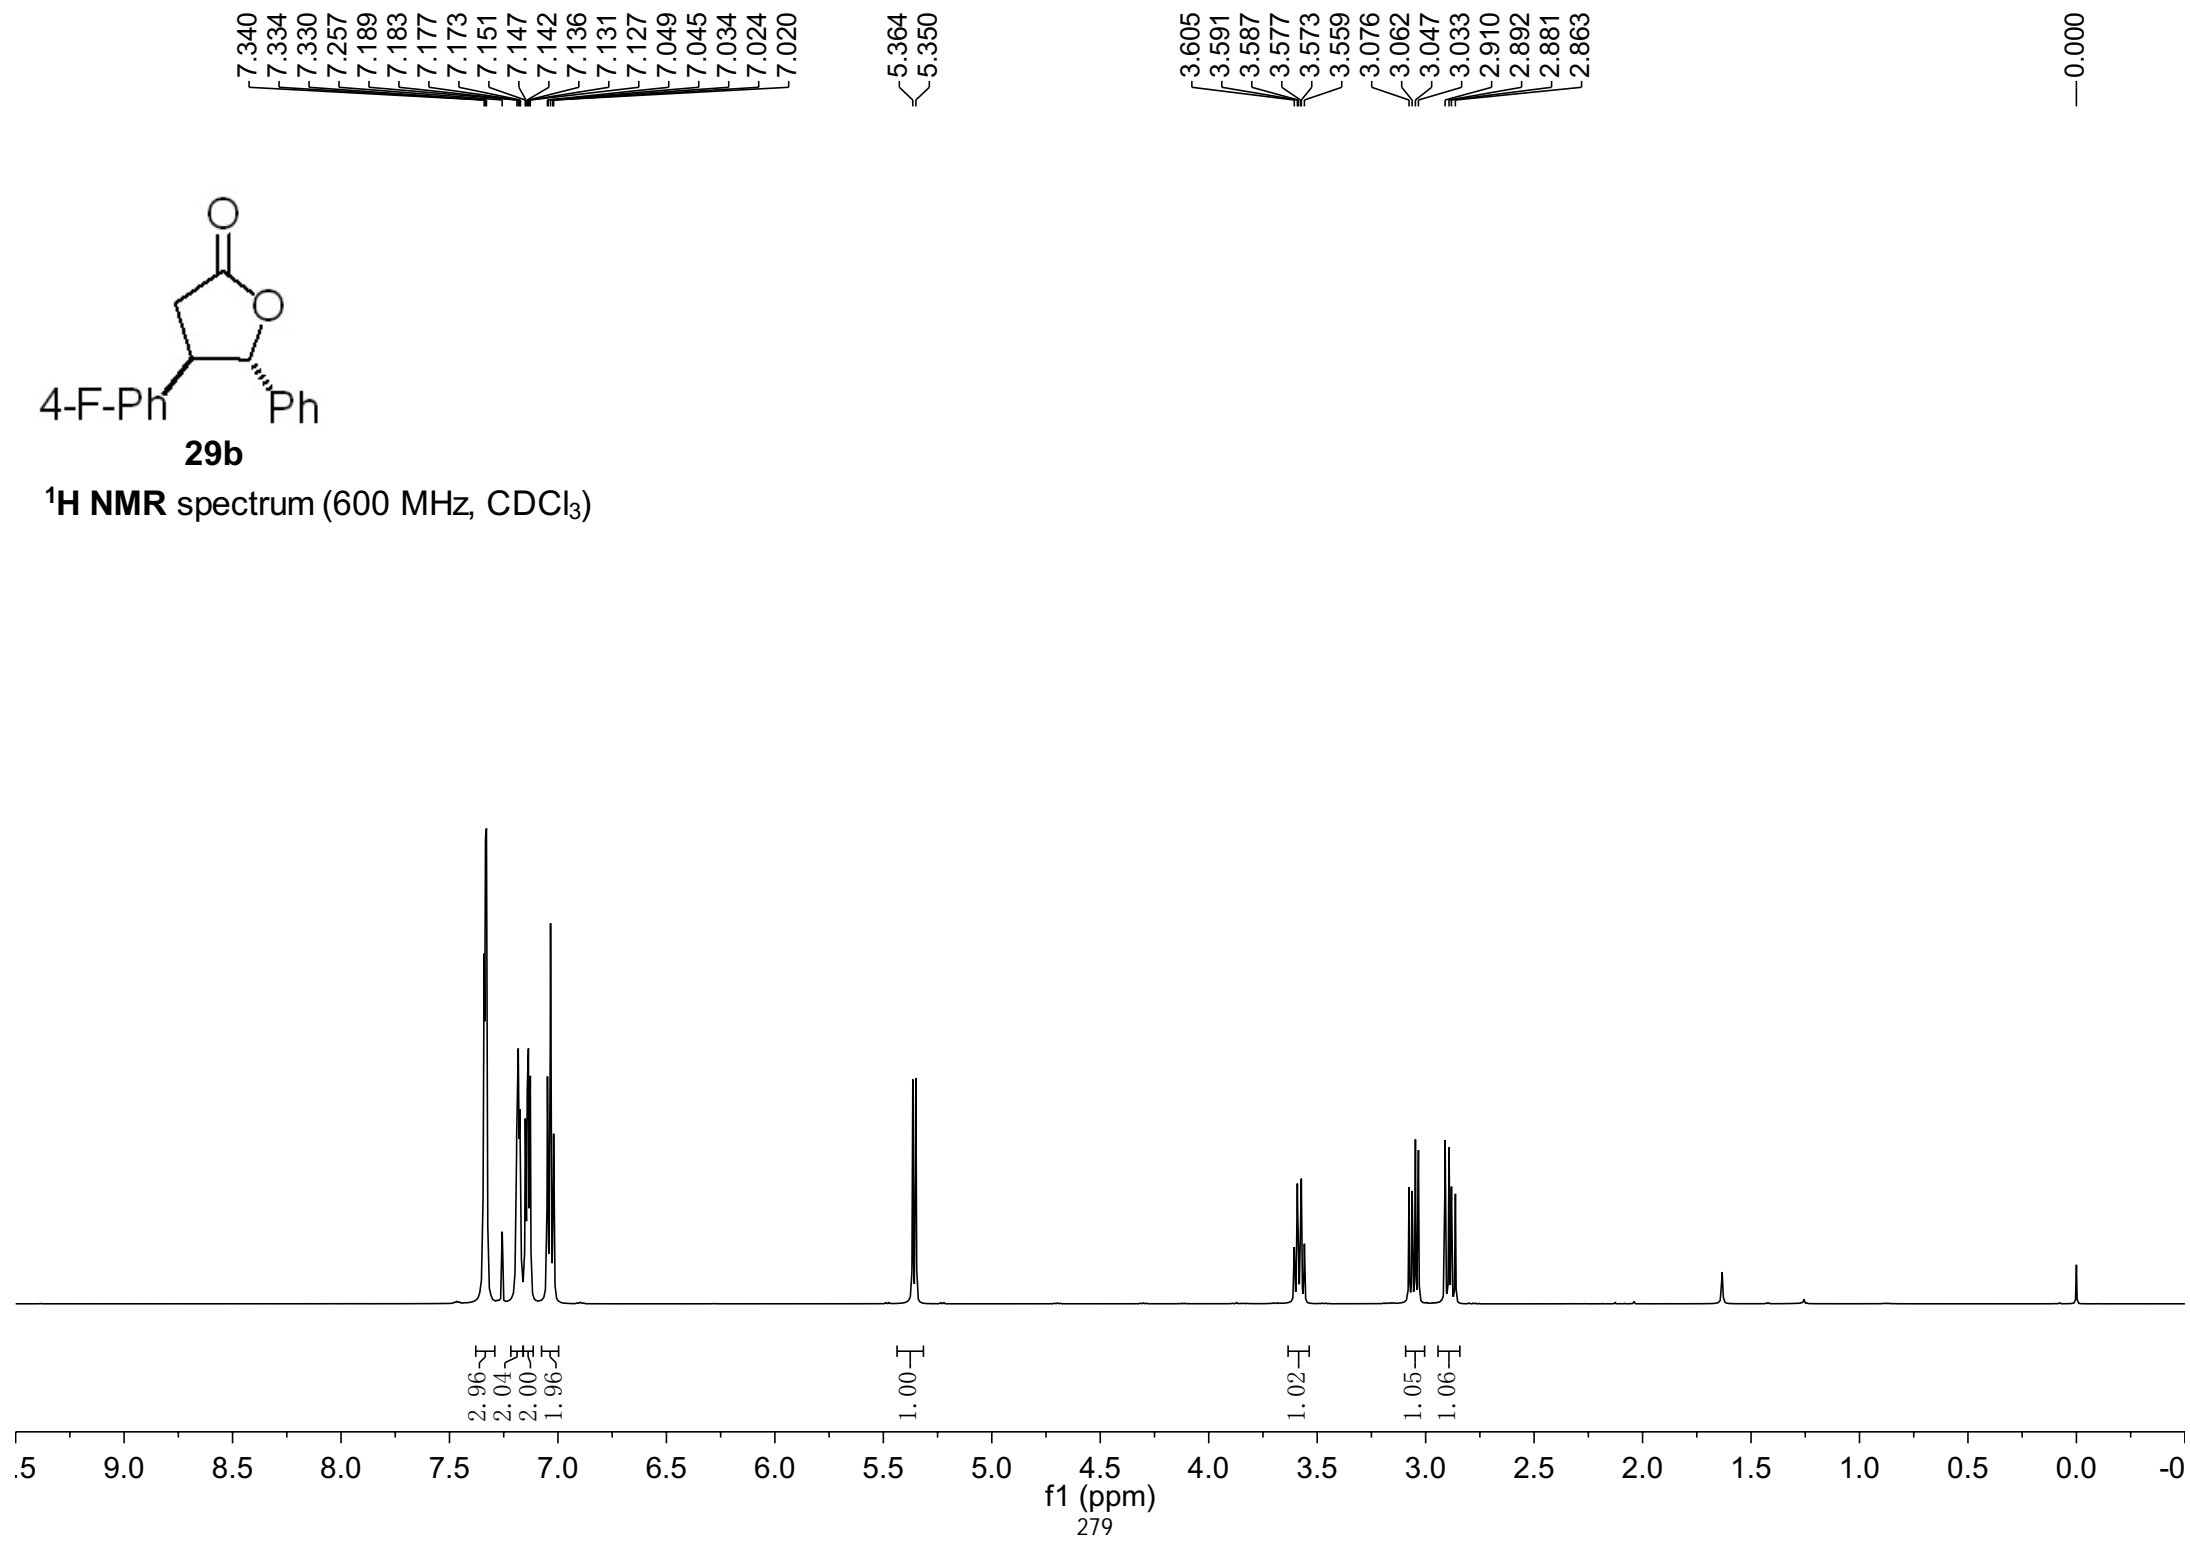

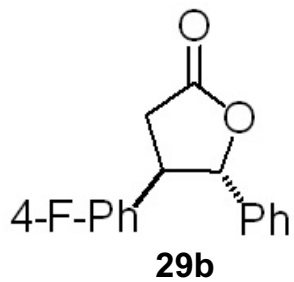

<sup>13</sup>C NMR spectrum (150 MHz, CDCl<sub>3</sub>)

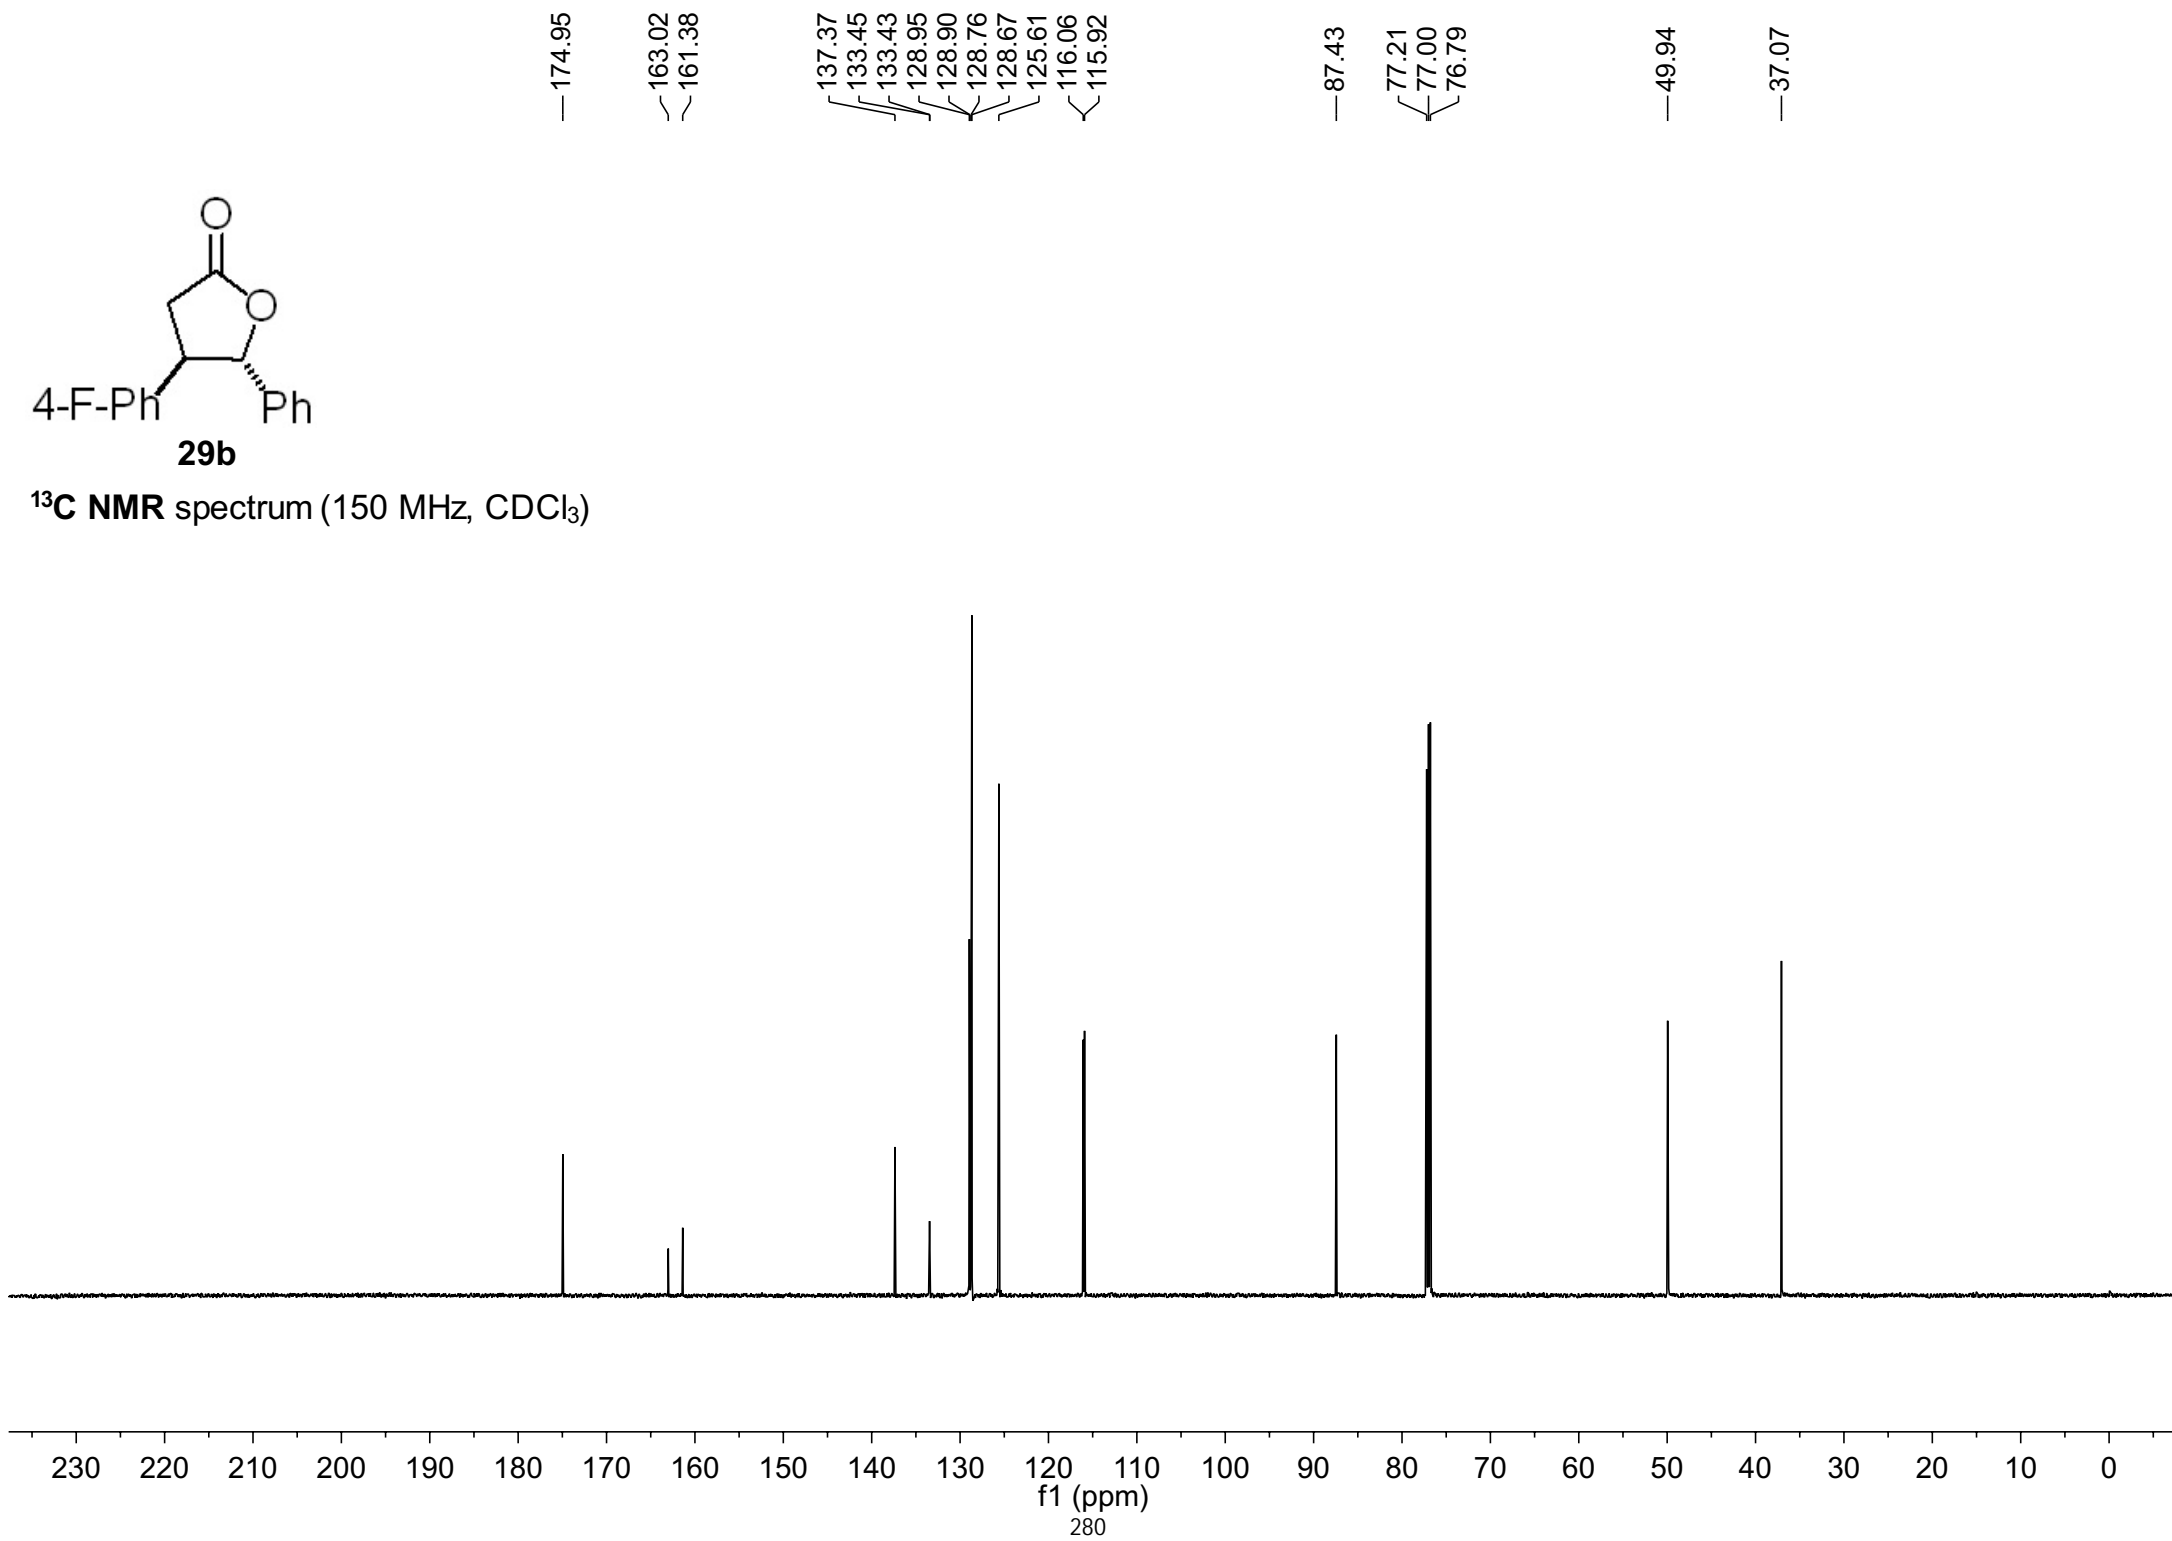



<sup>19</sup>F NMR spectrum (376 MHz, CDCl<sub>3</sub>)

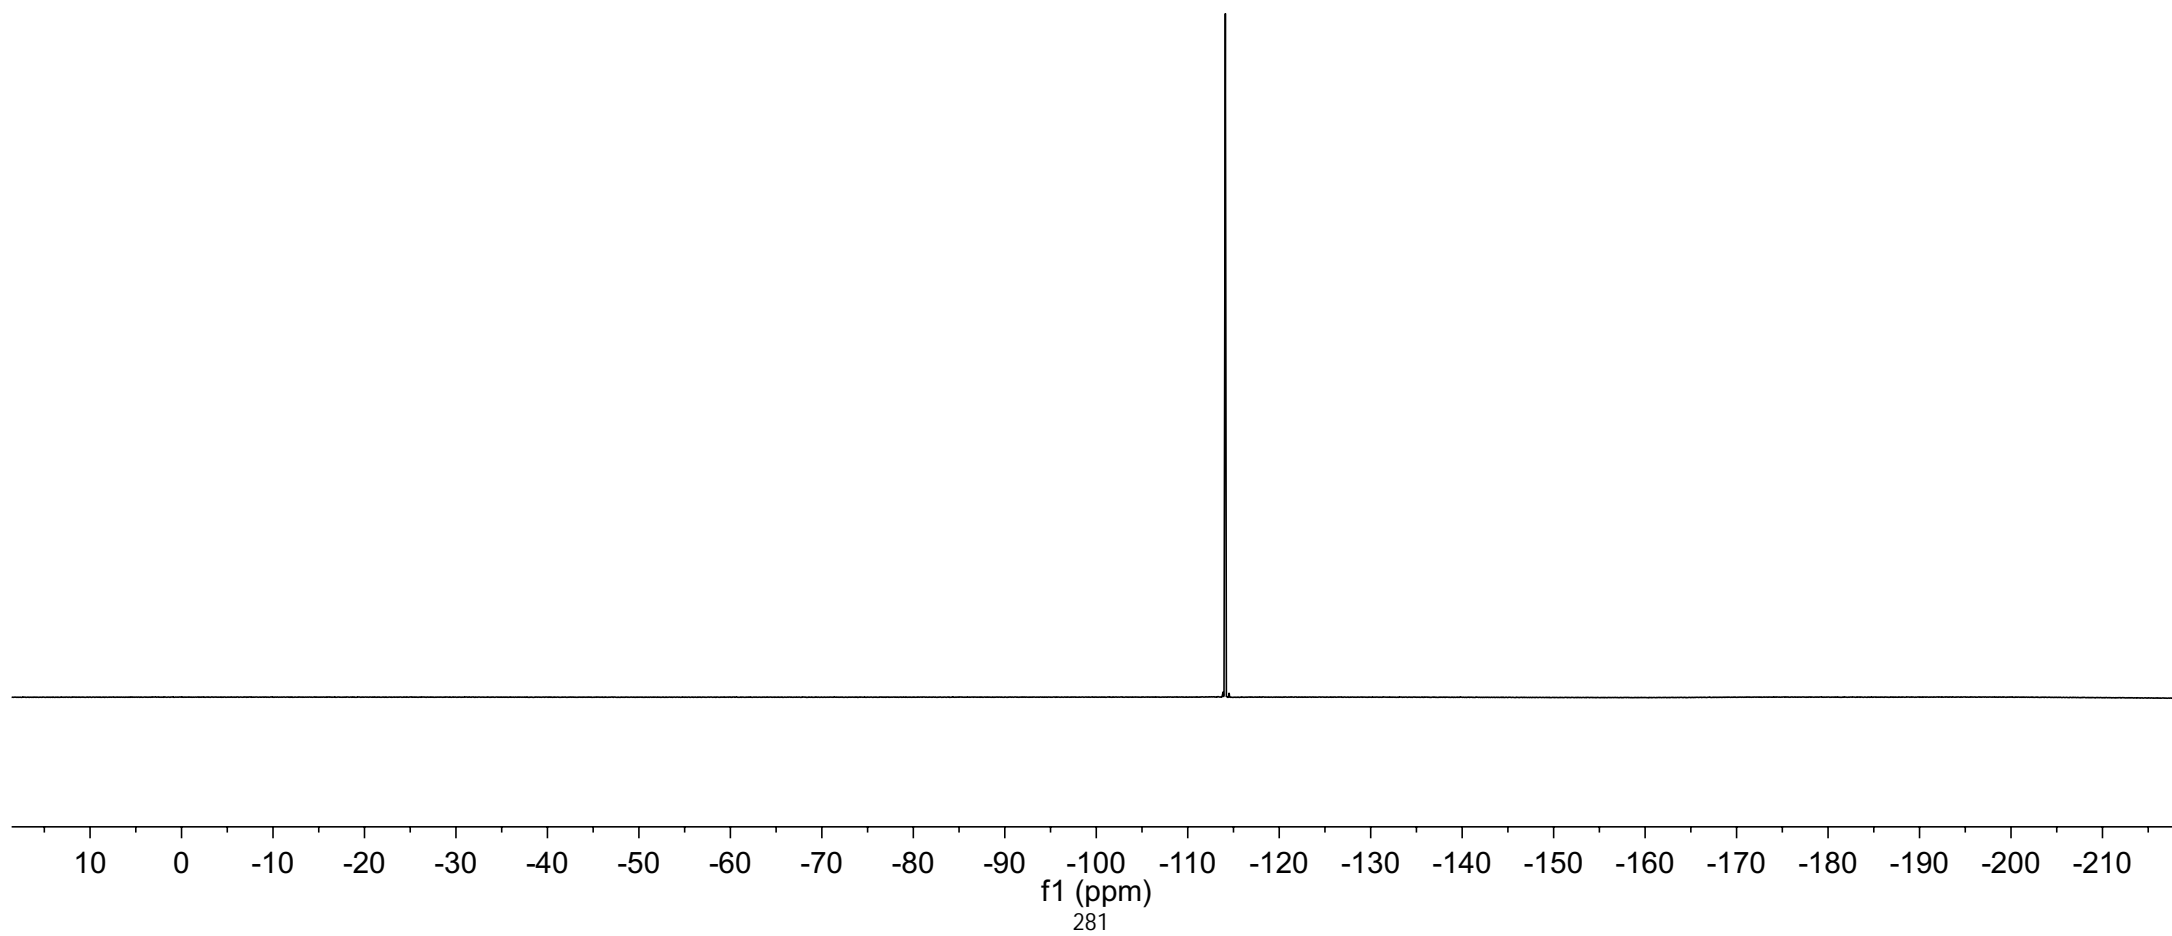

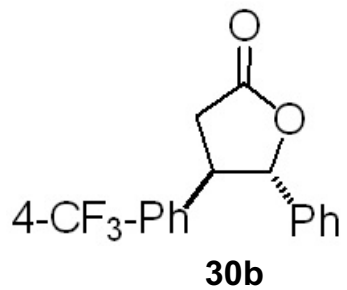

<sup>1</sup>H NMR spectrum (600 MHz, CDCl<sub>3</sub>)

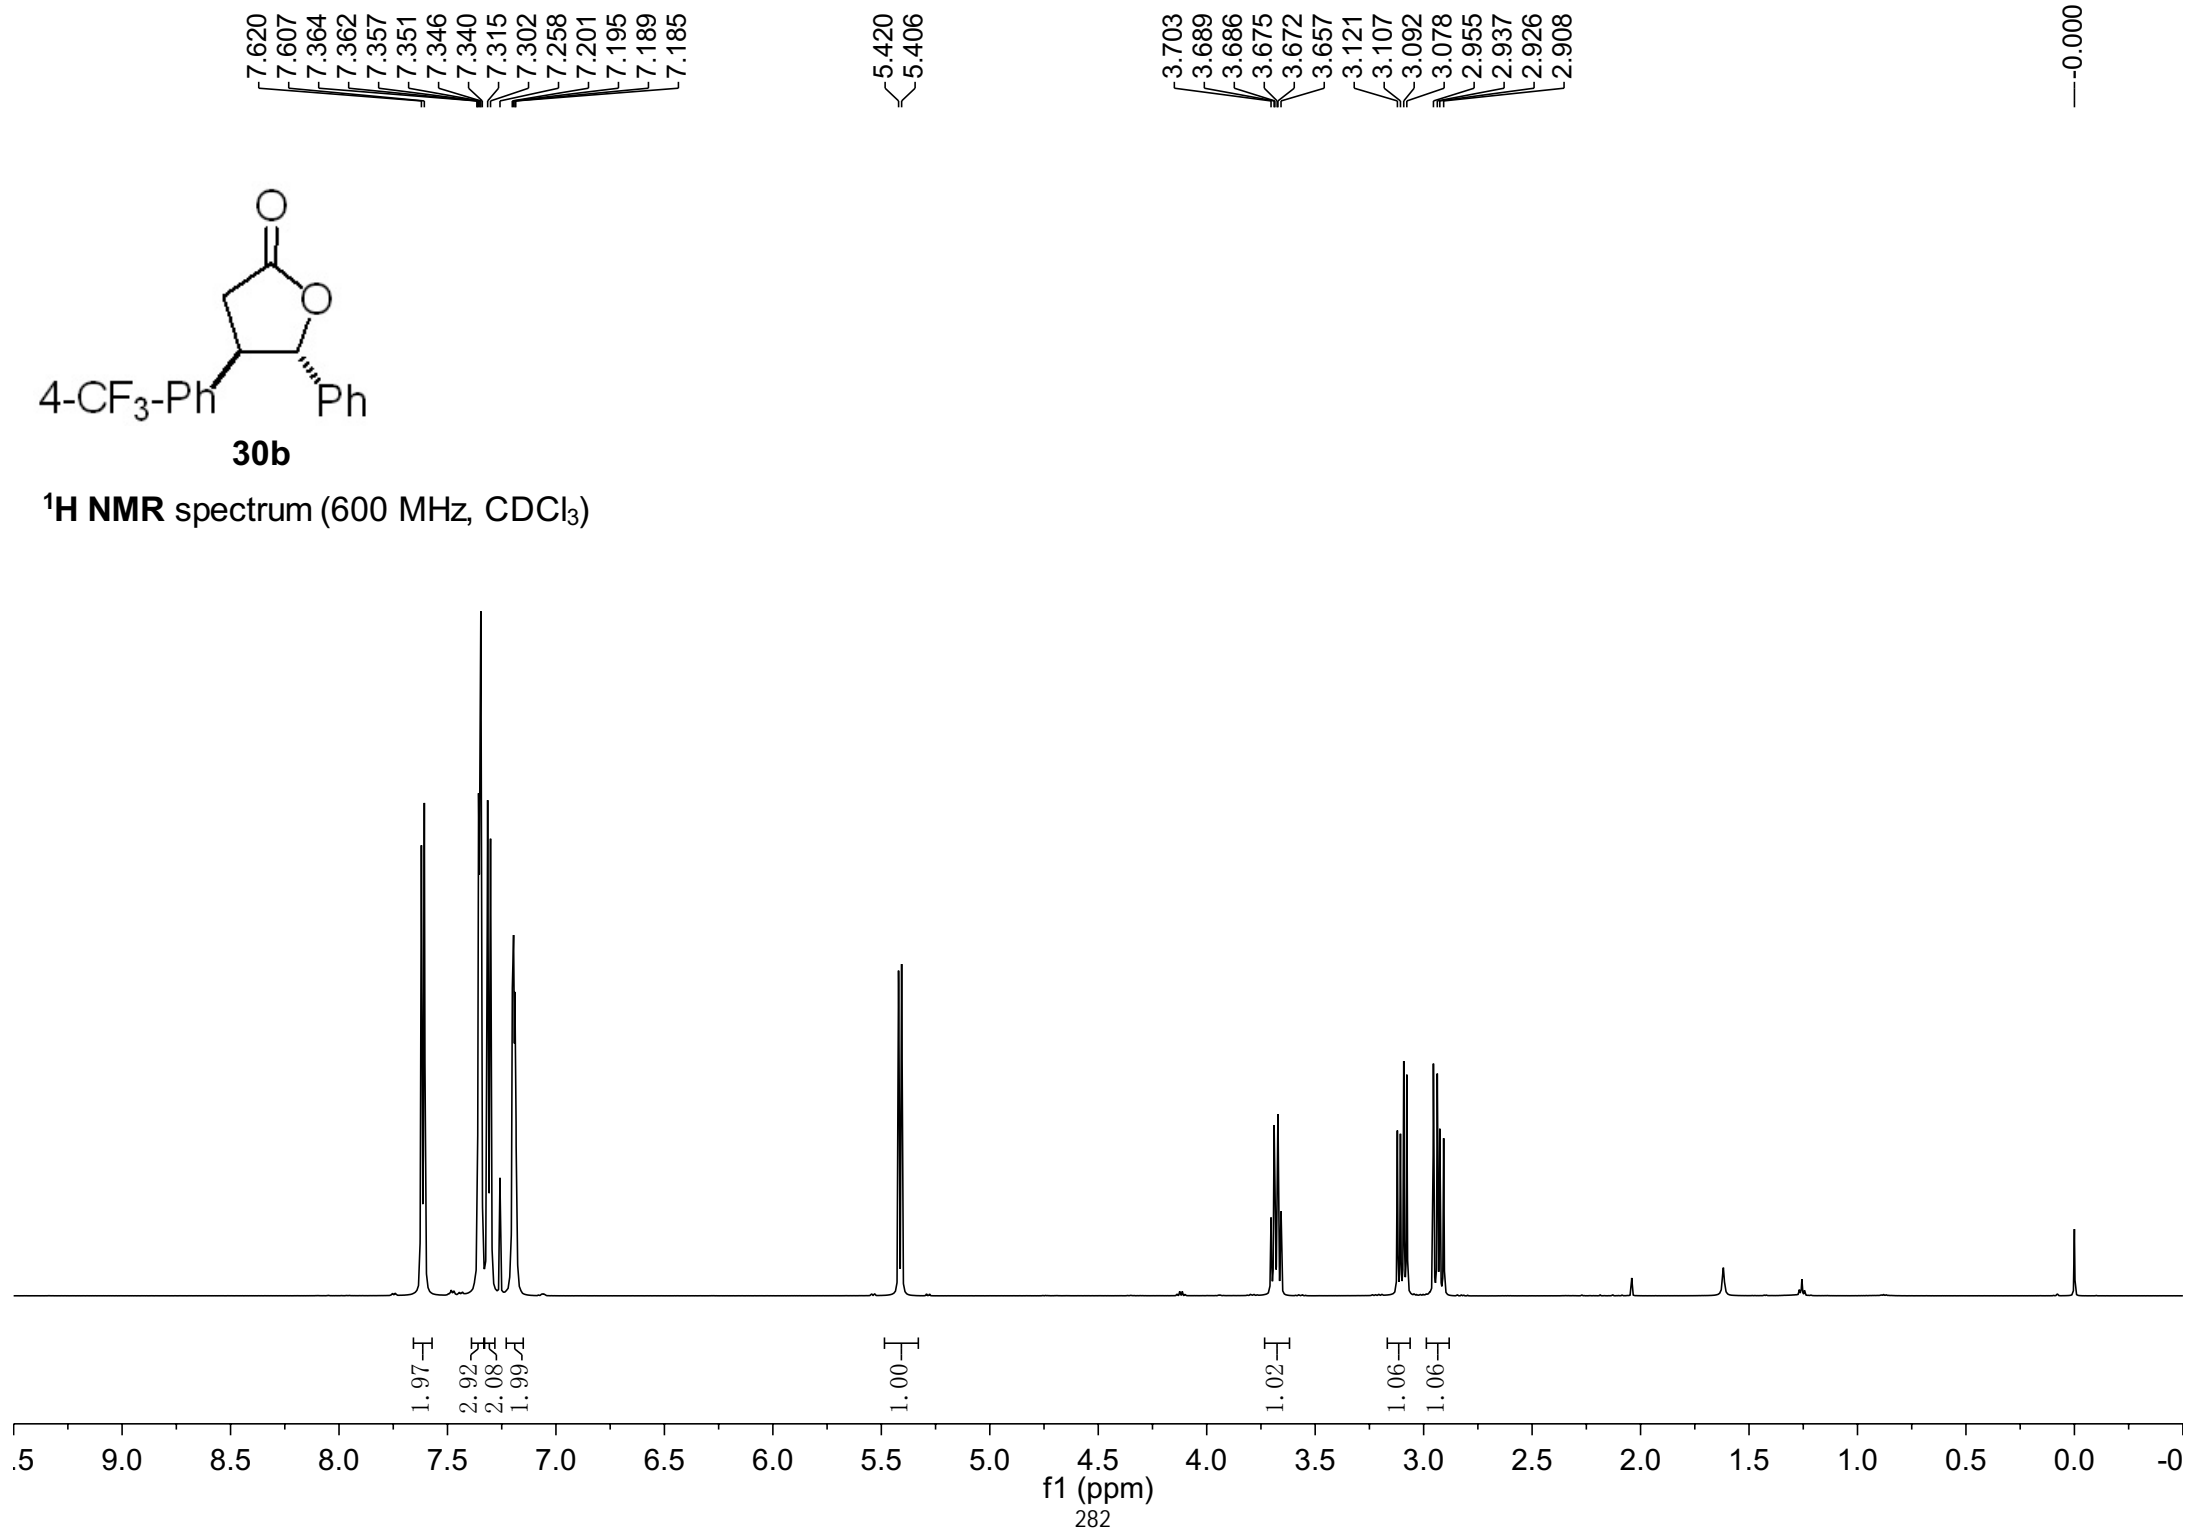



<sup>13</sup>C NMR spectrum (150 MHz, CDCl<sub>3</sub>)

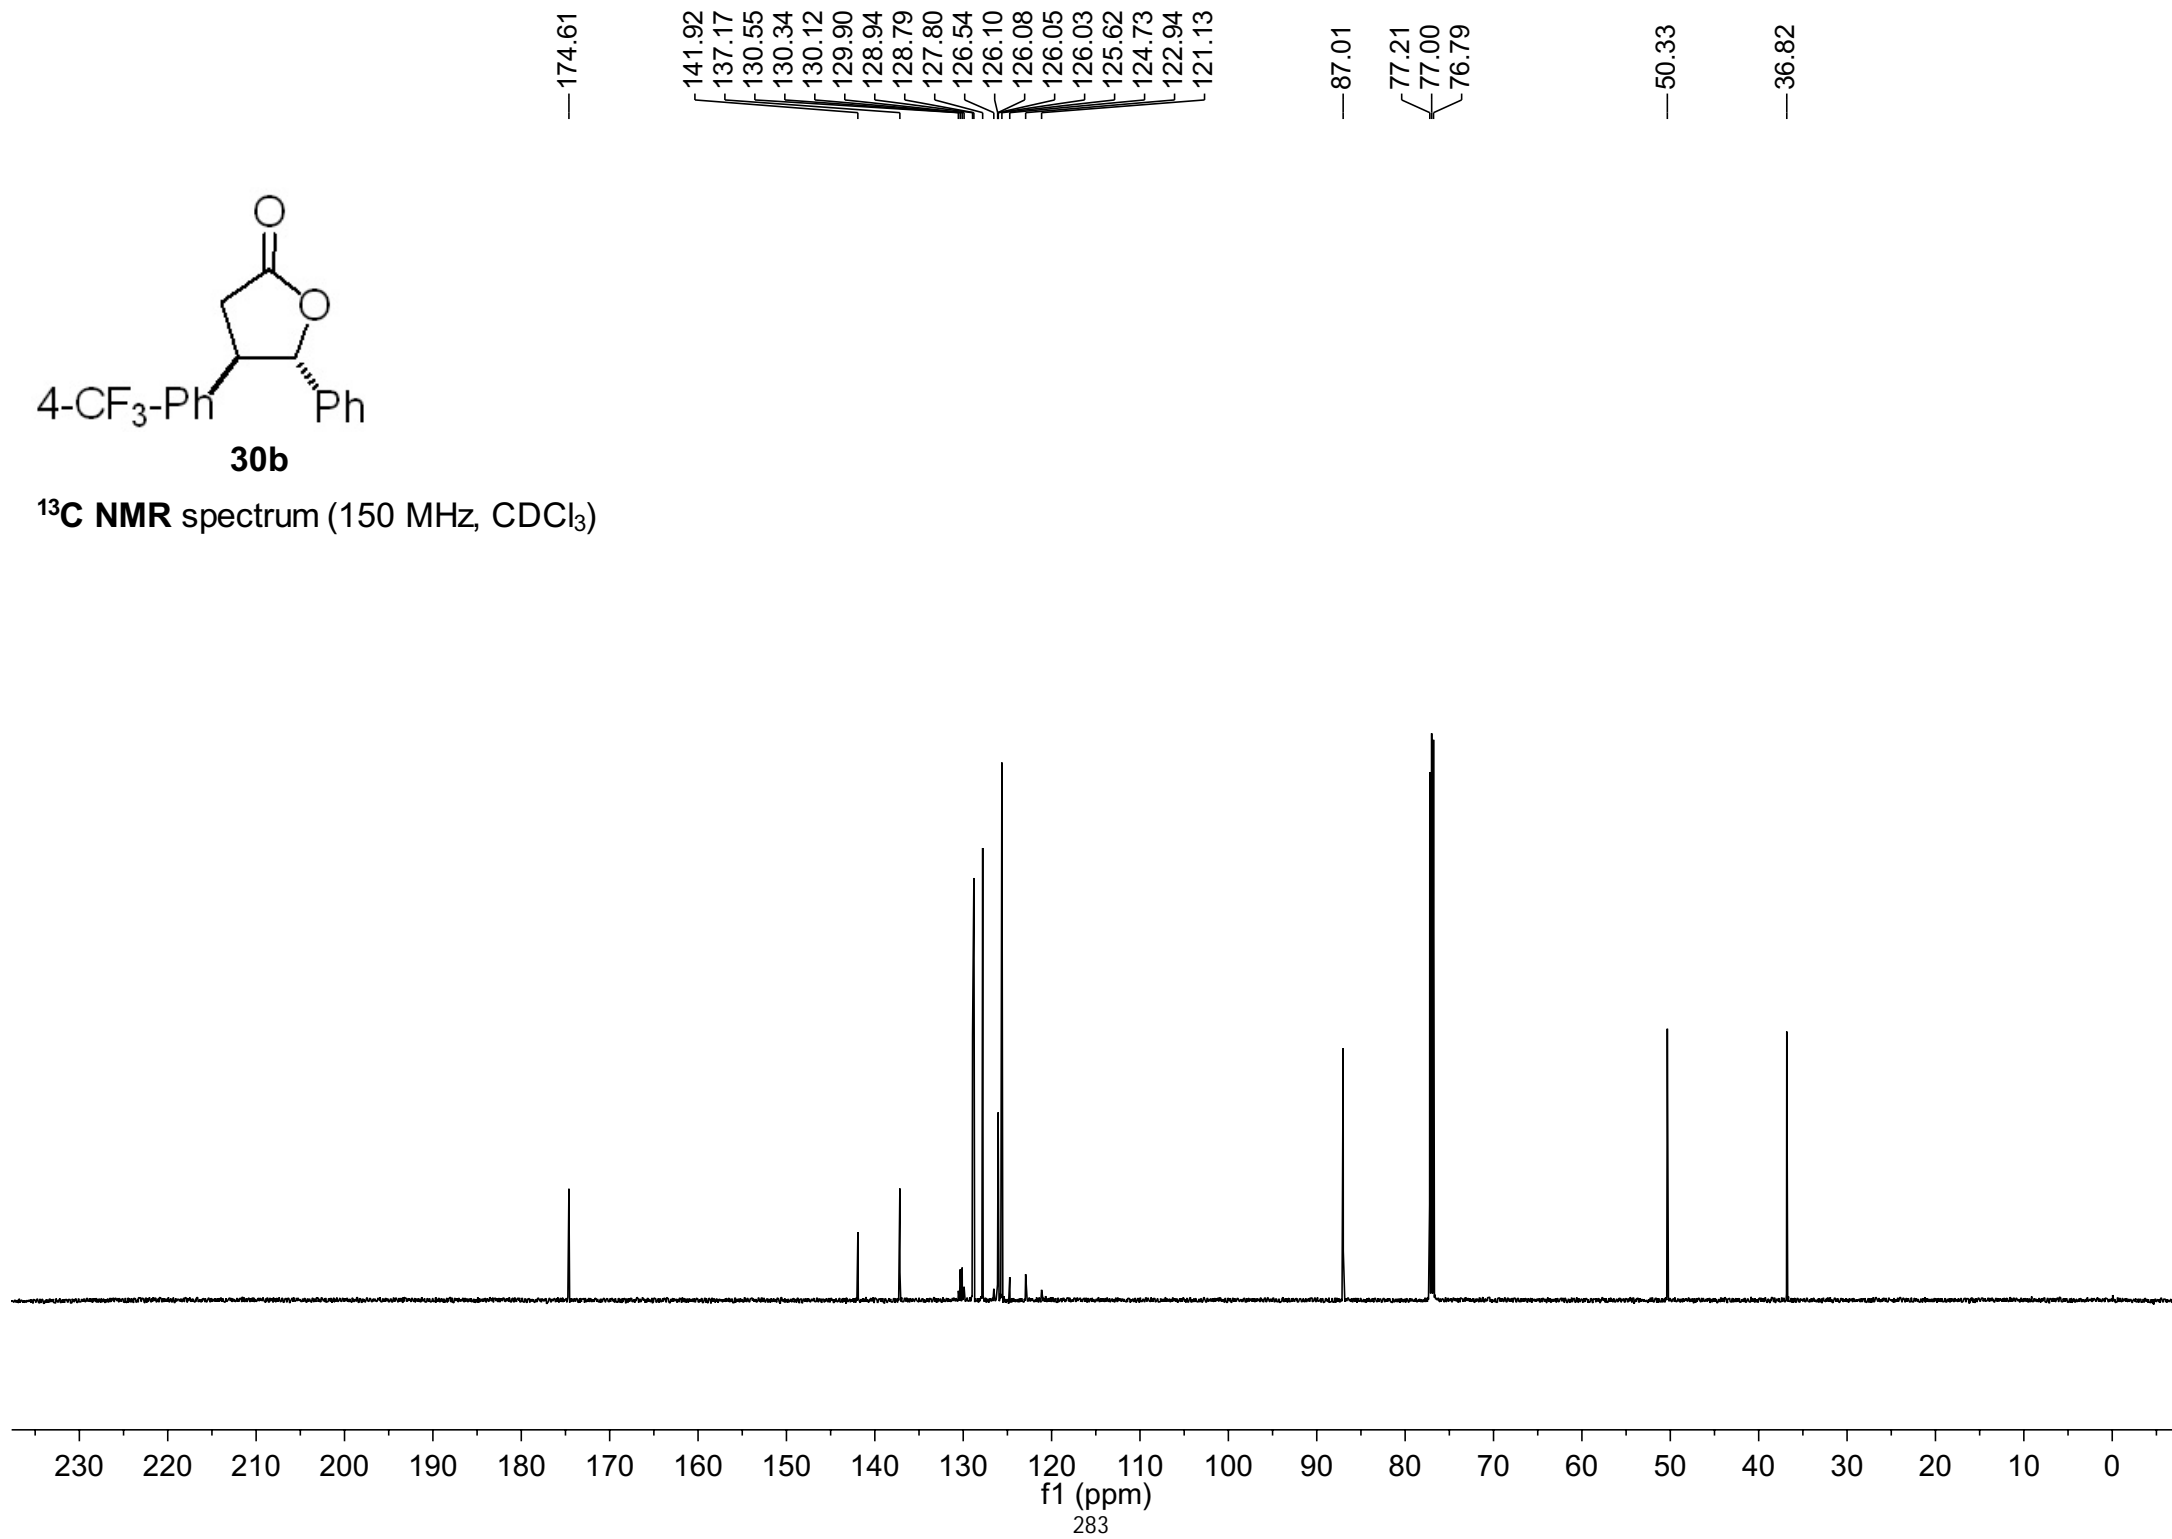



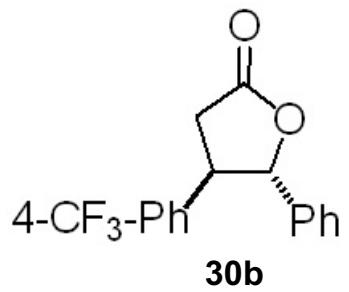

<sup>19</sup>F NMR spectrum (376 MHz, CDCl<sub>3</sub>)

---62.62

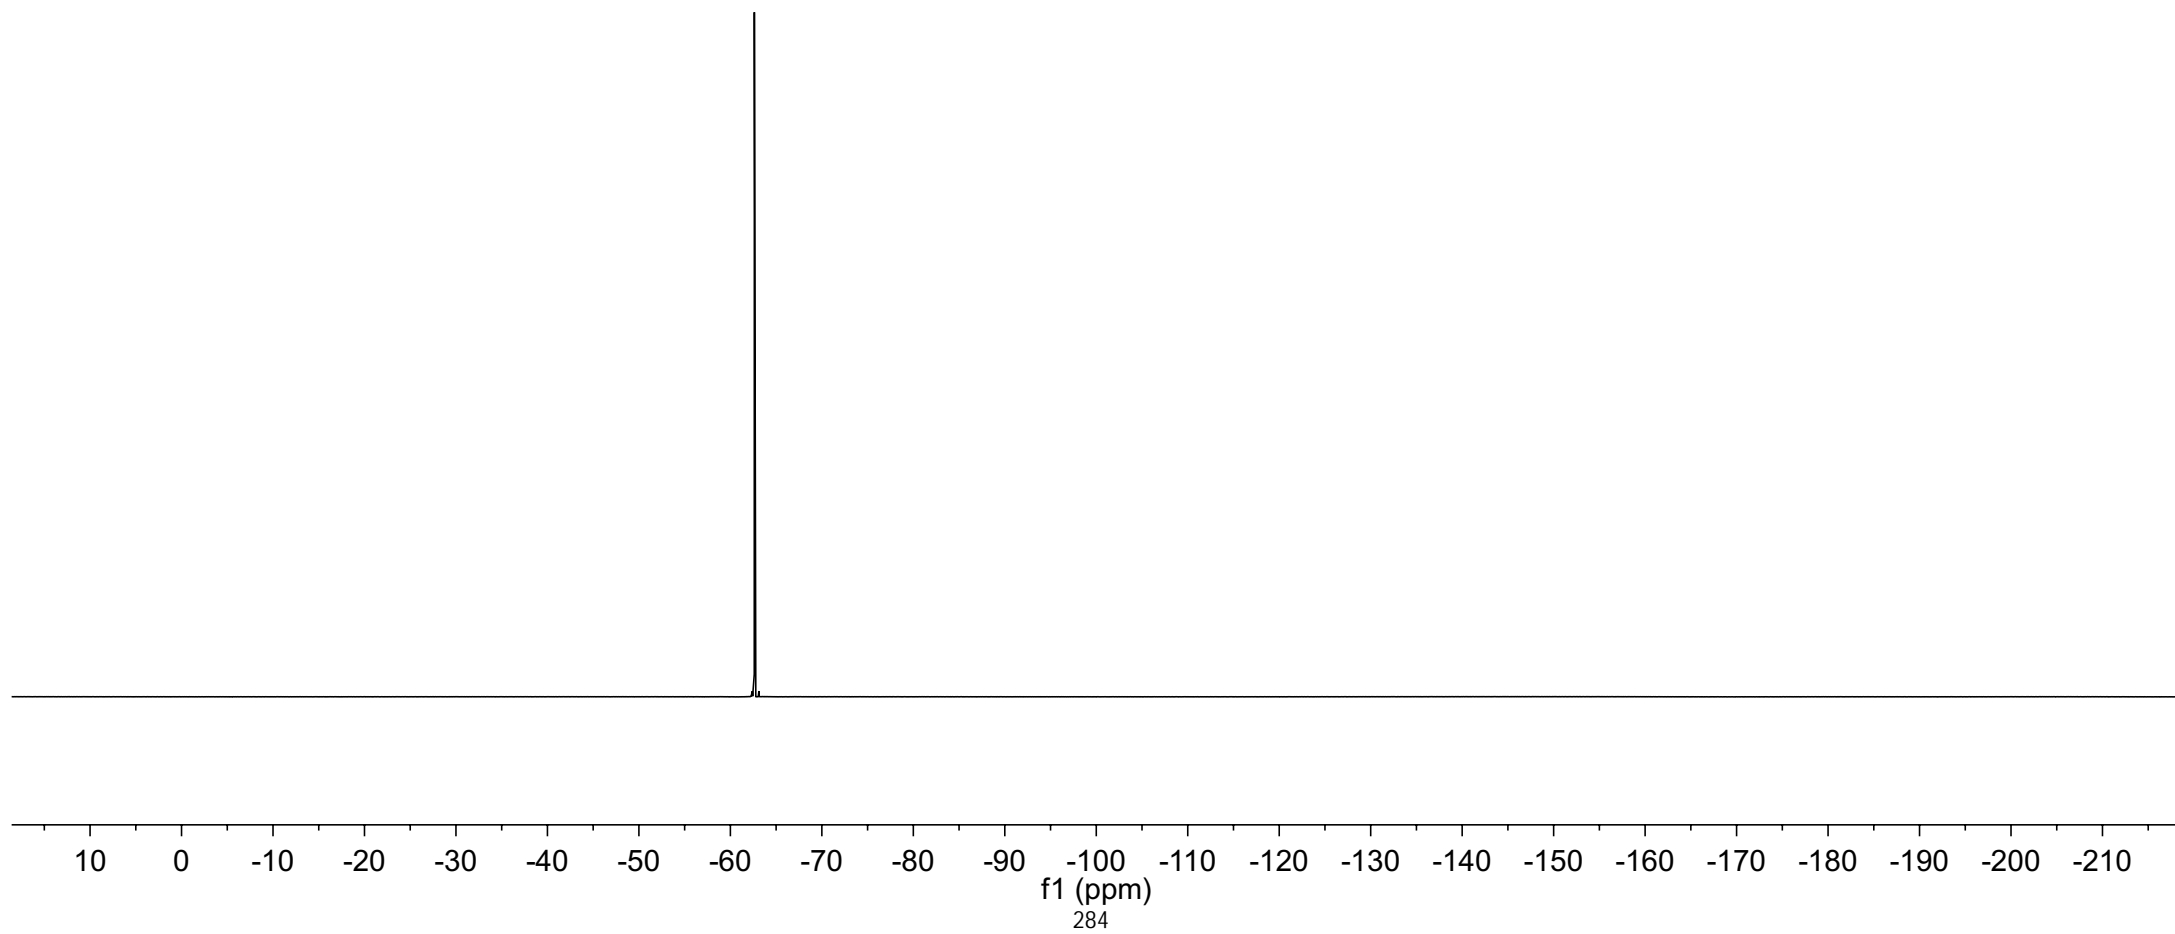

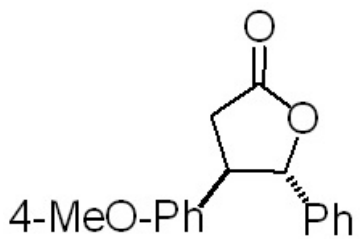

**31b**

<sup>1</sup>H NMR spectrum (600 MHz, CDCl<sub>3</sub>)

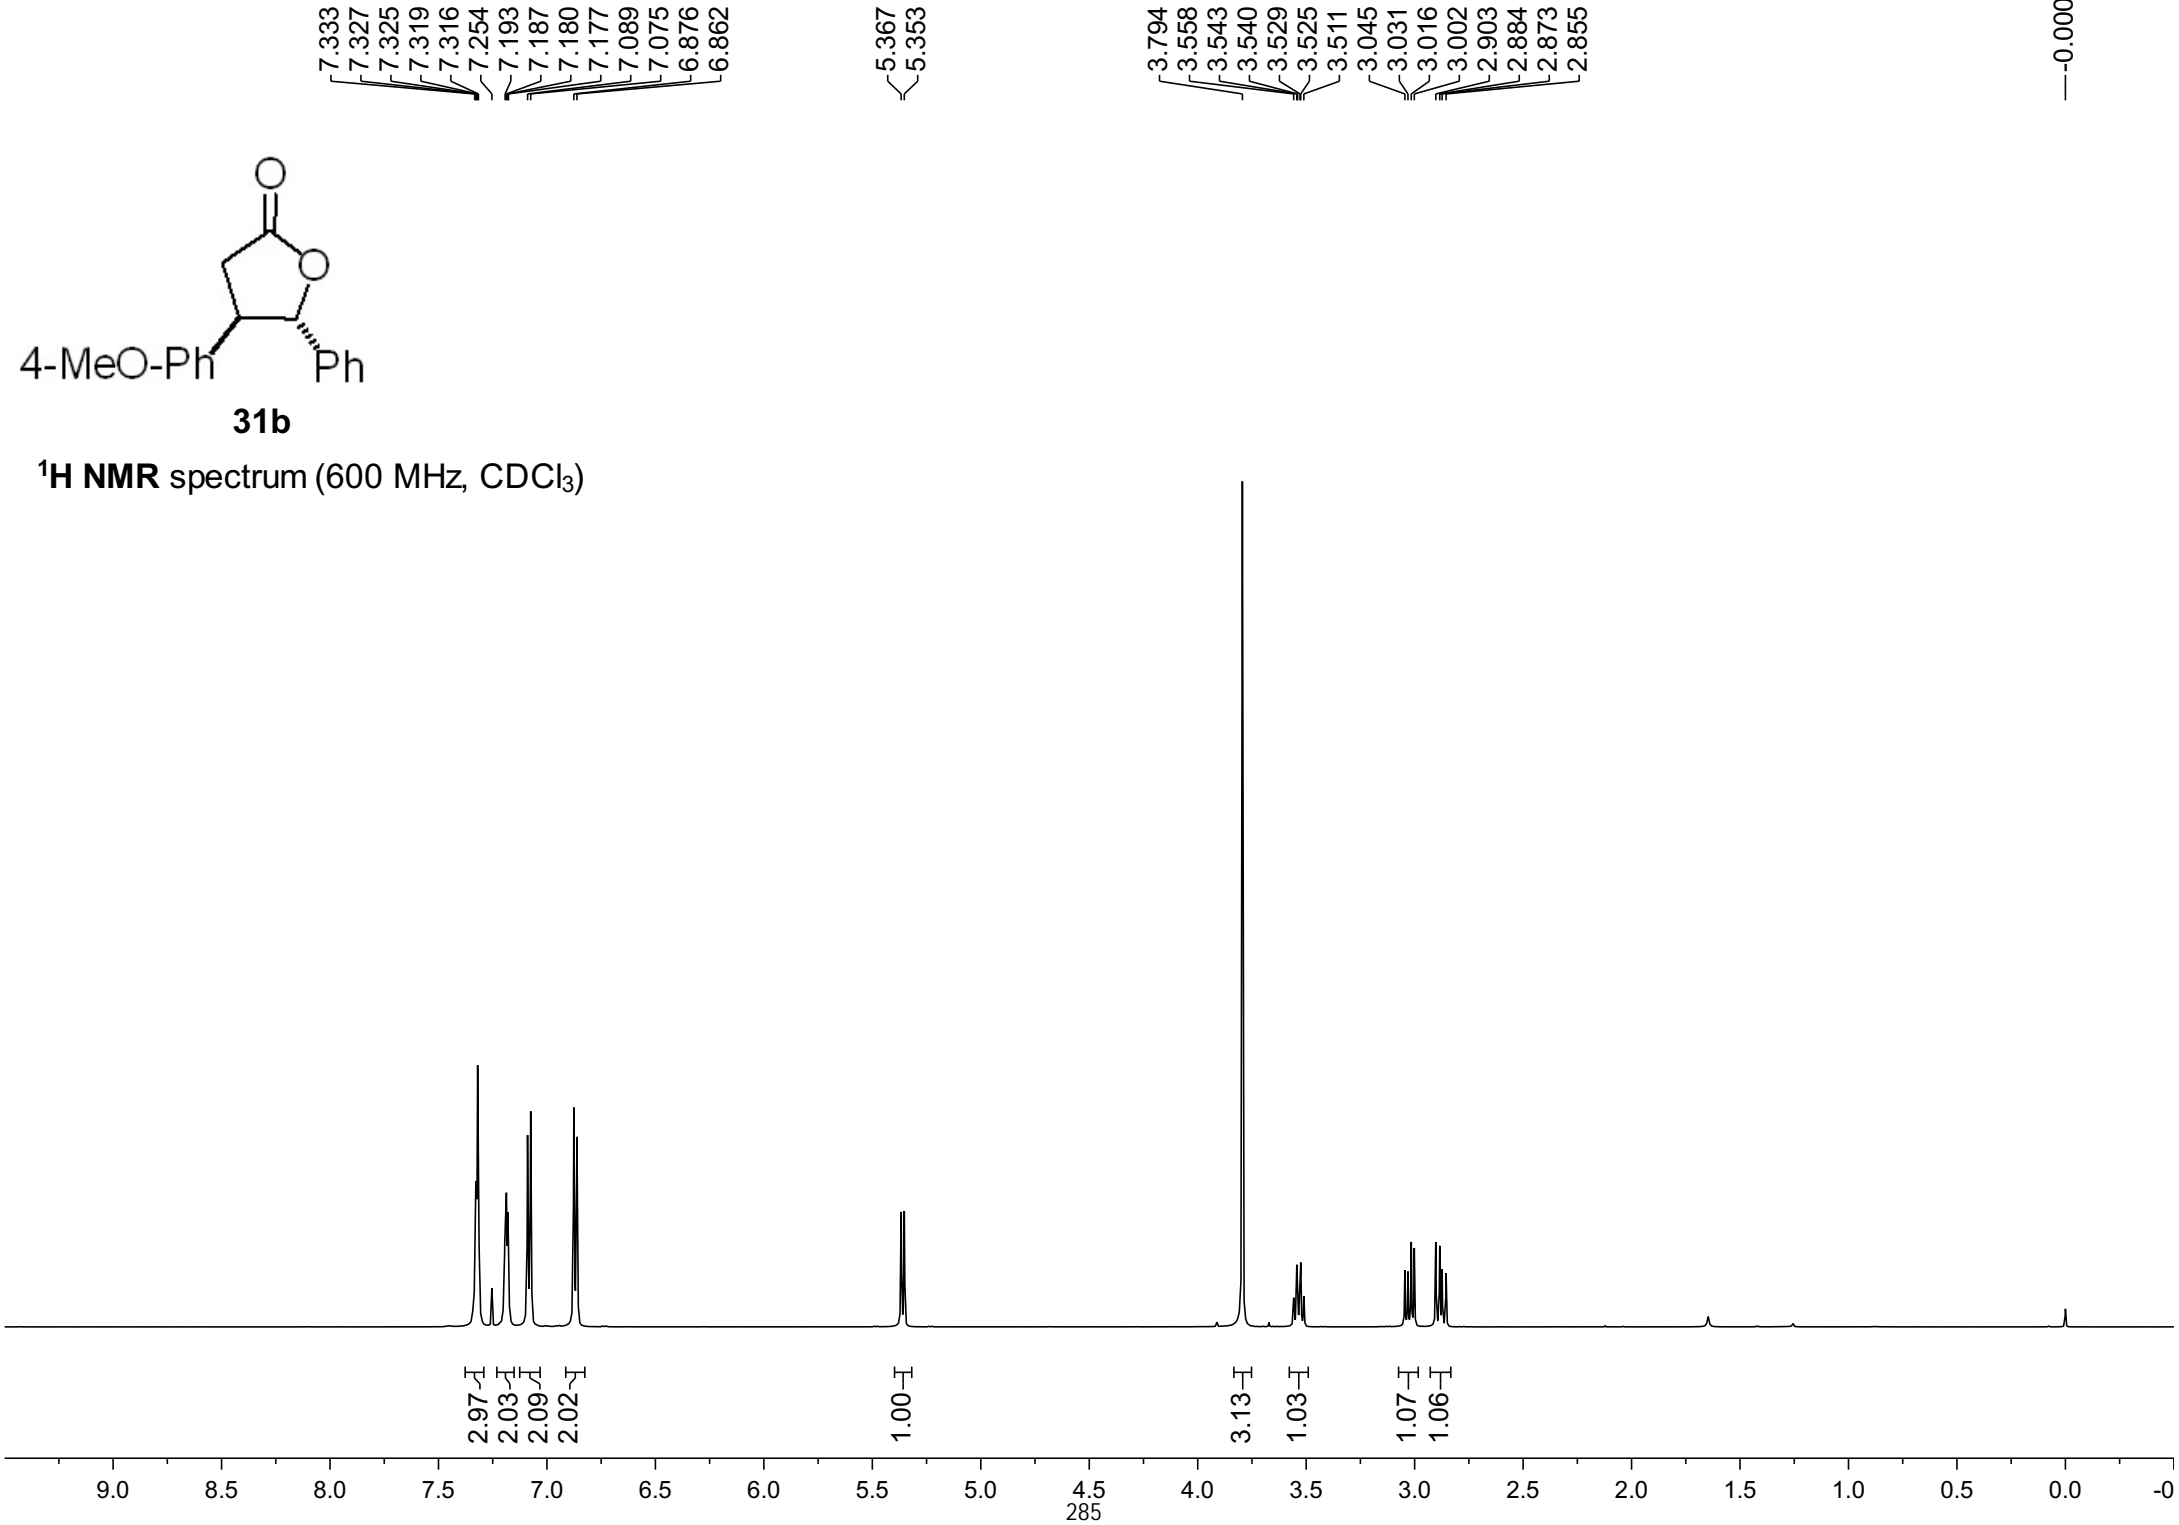



**31b**

<sup>13</sup>C NMR spectrum (150 MHz, CDCl<sub>3</sub>)

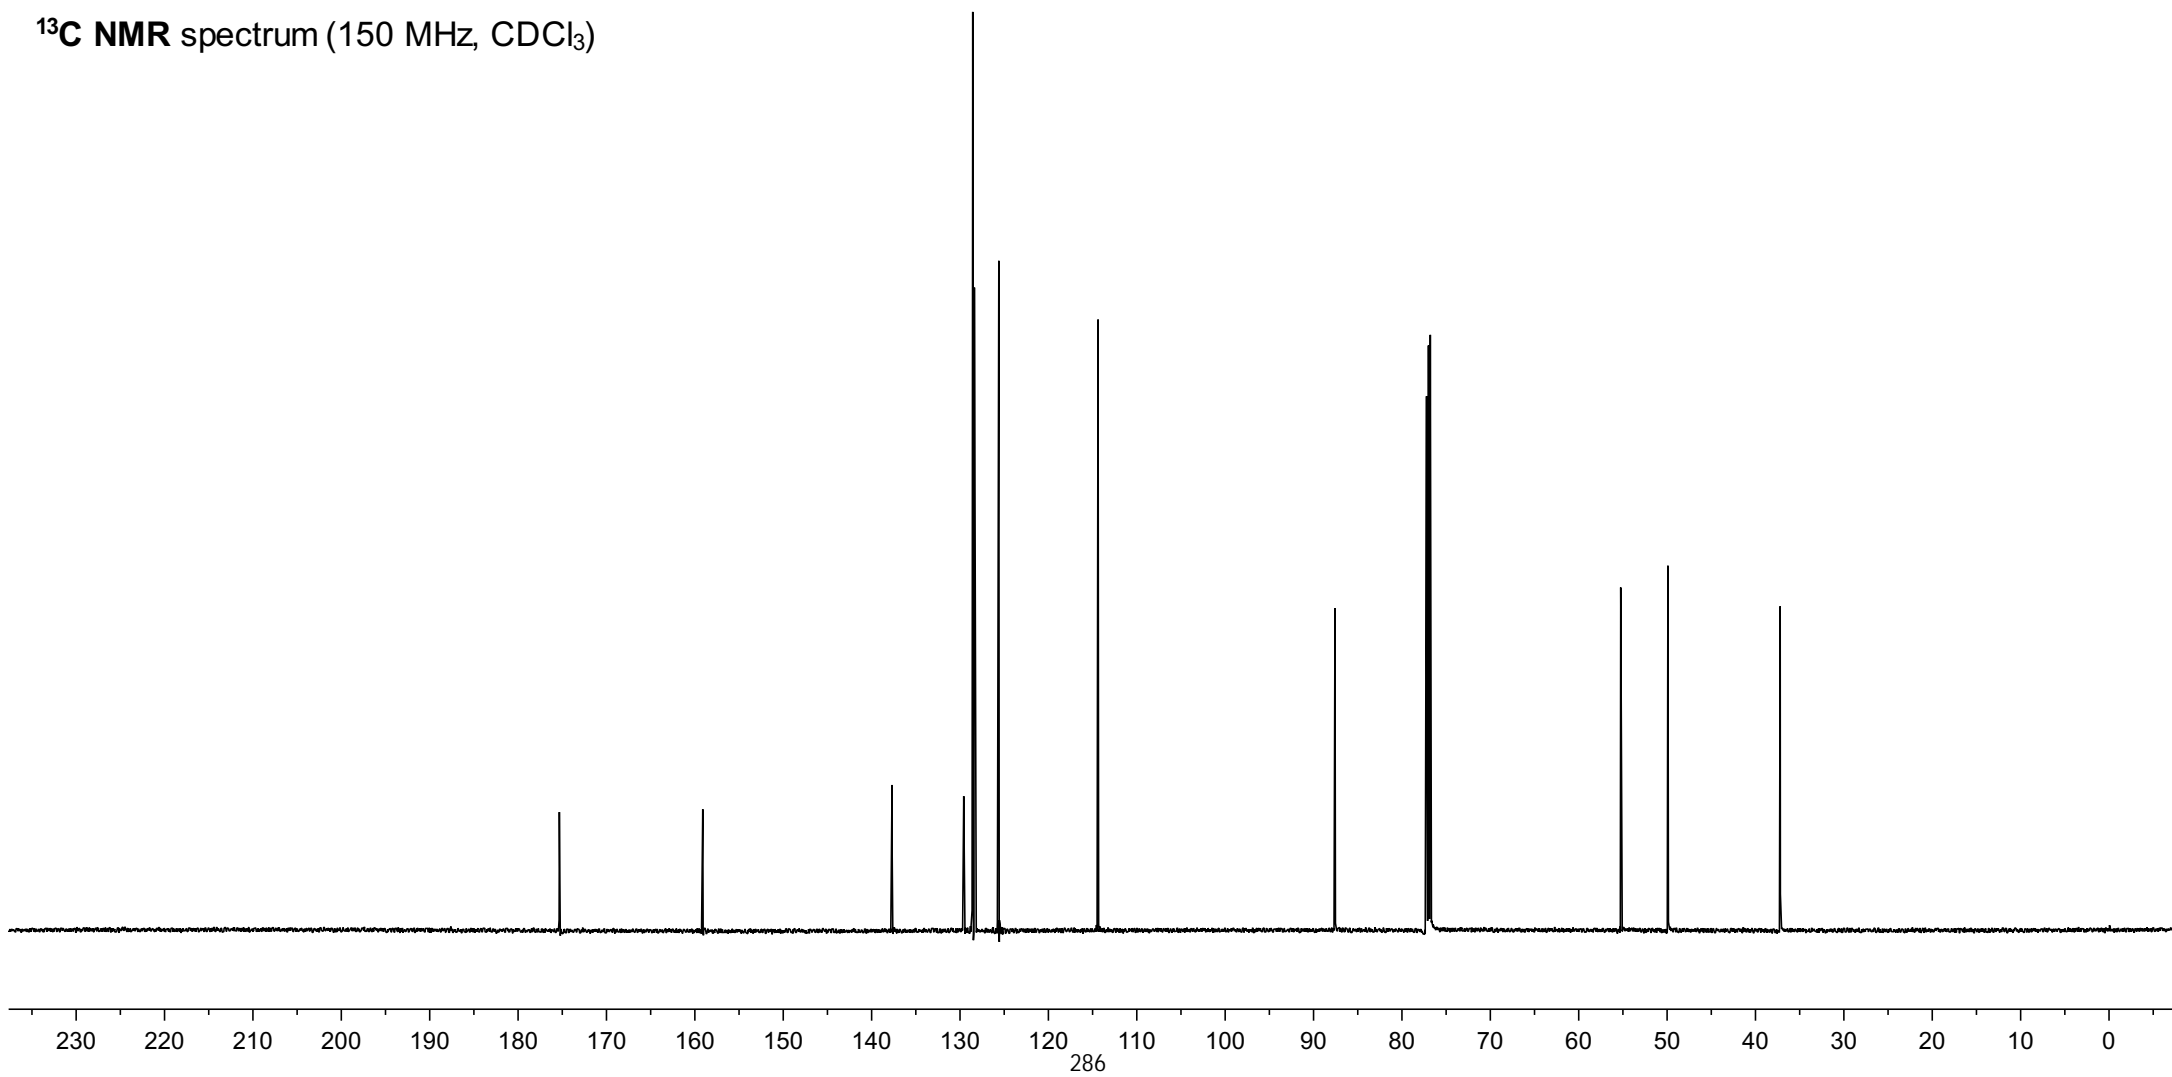

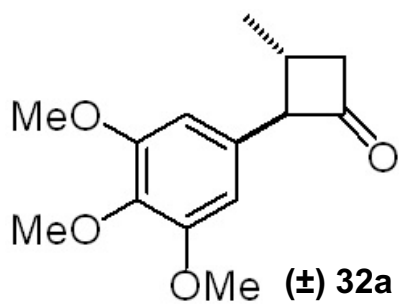

<sup>1</sup>H NMR spectrum (400 MHz, CDCl<sub>3</sub>)

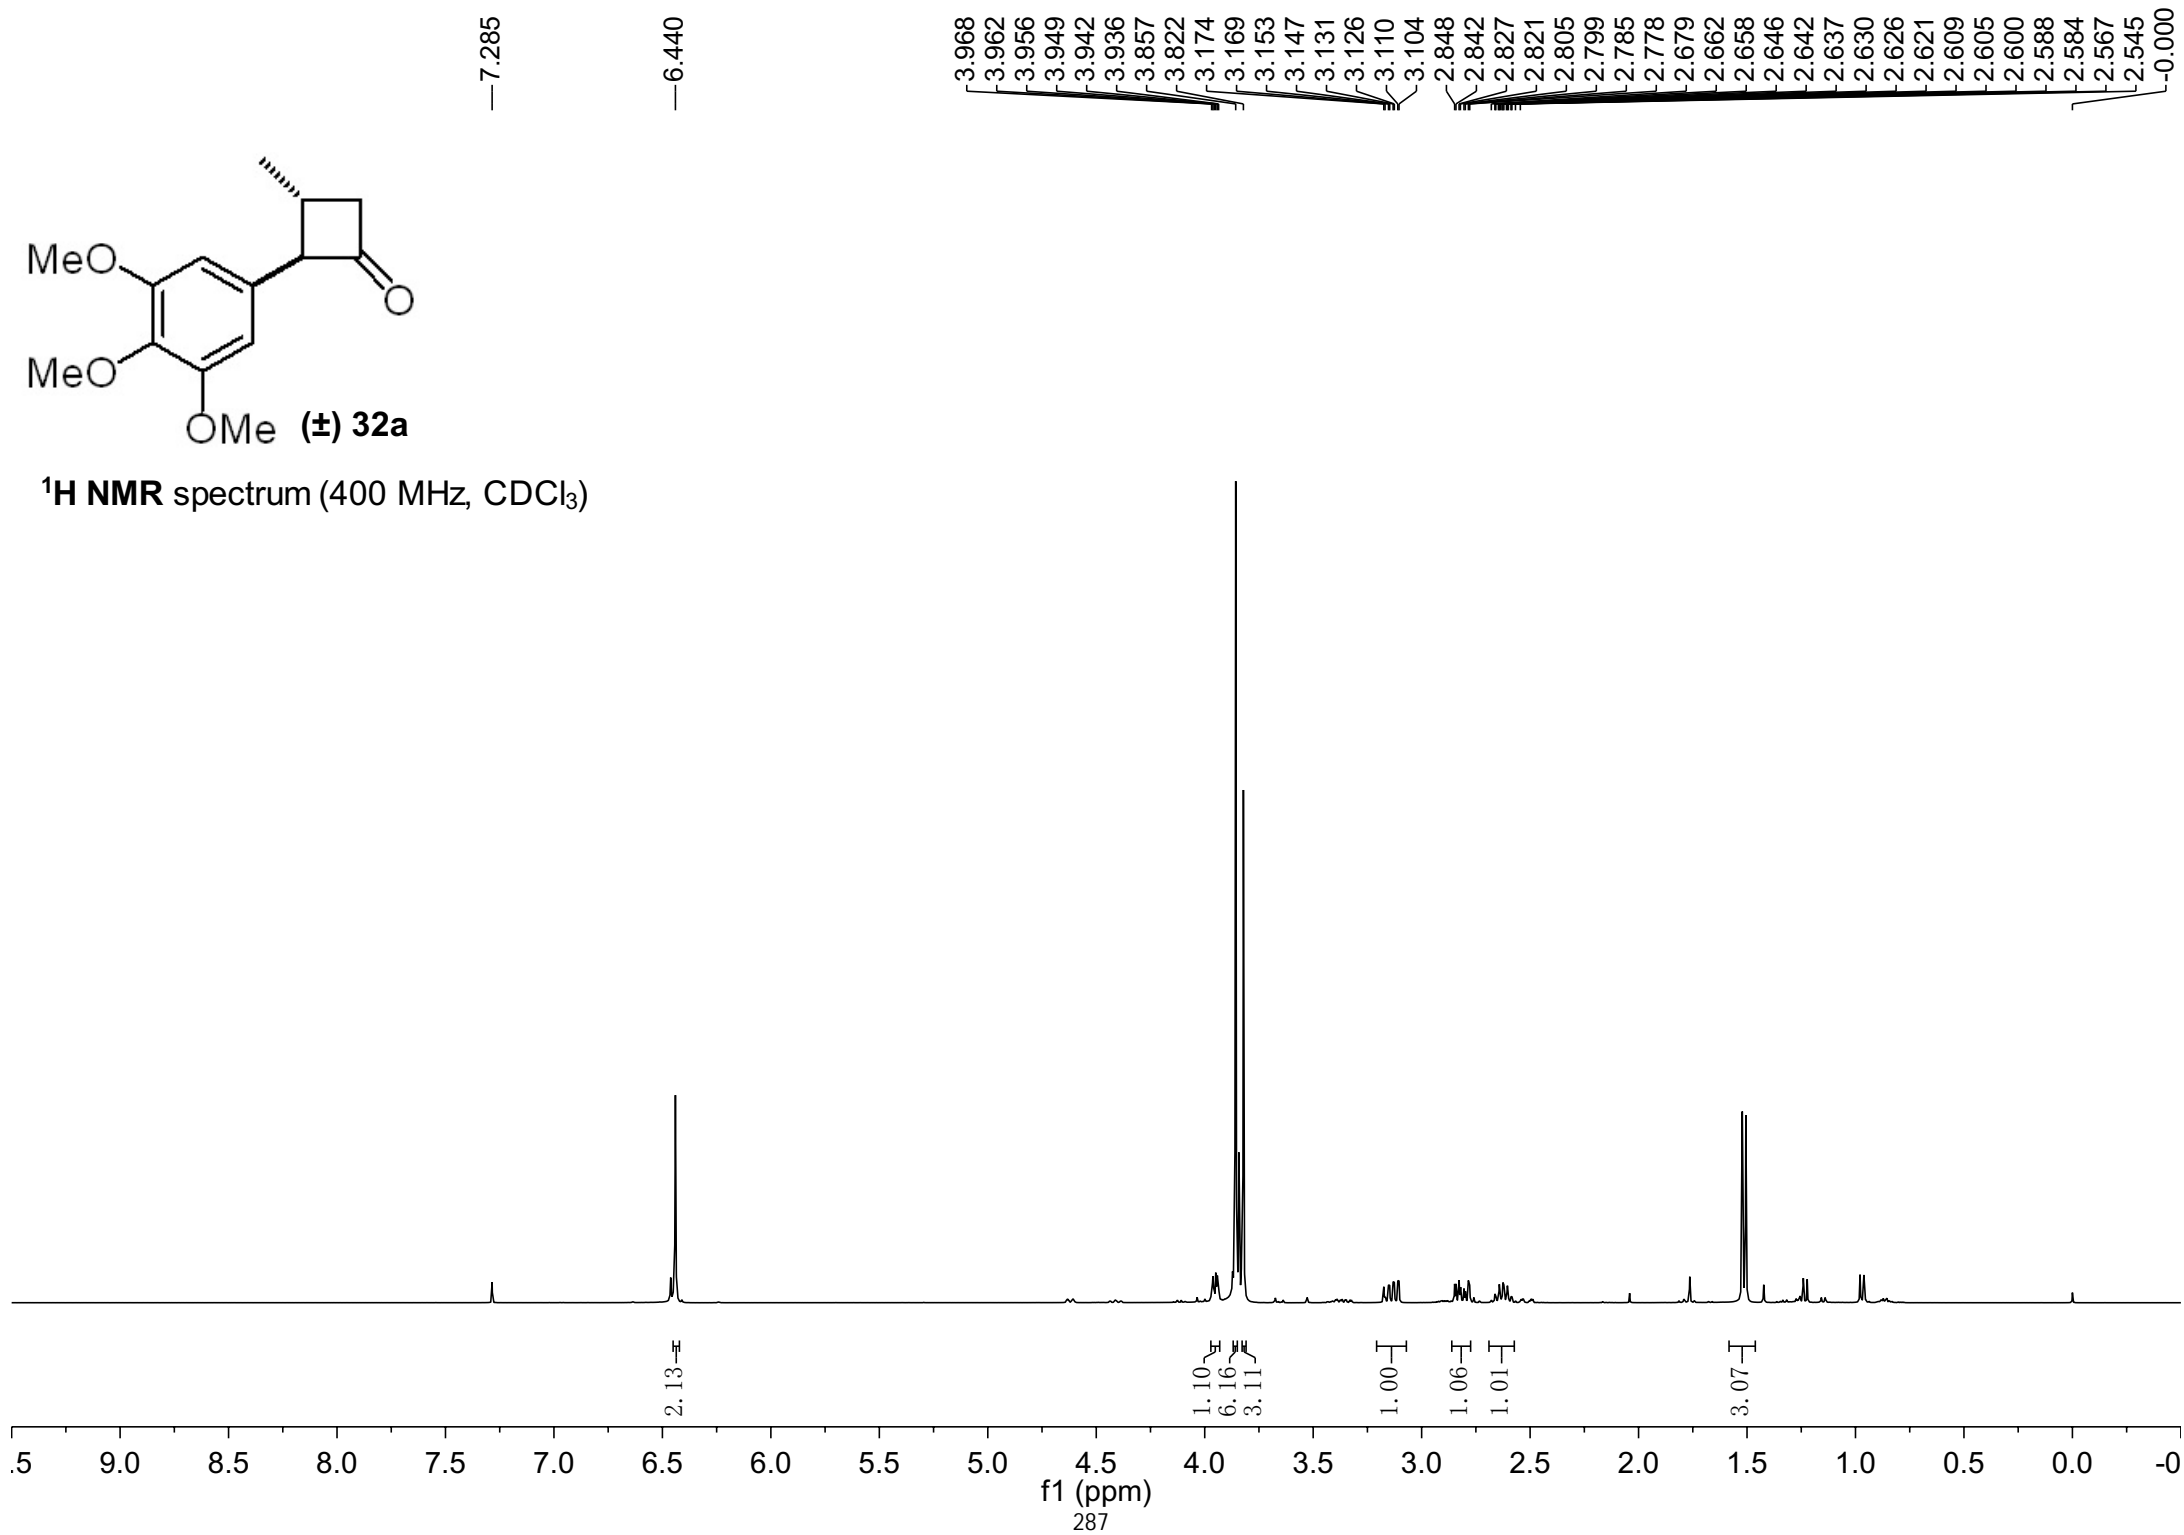

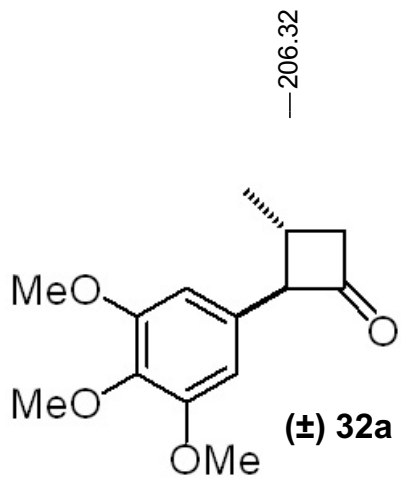

<sup>13</sup>C NMR spectrum (100 MHz, CDCl<sub>3</sub>)

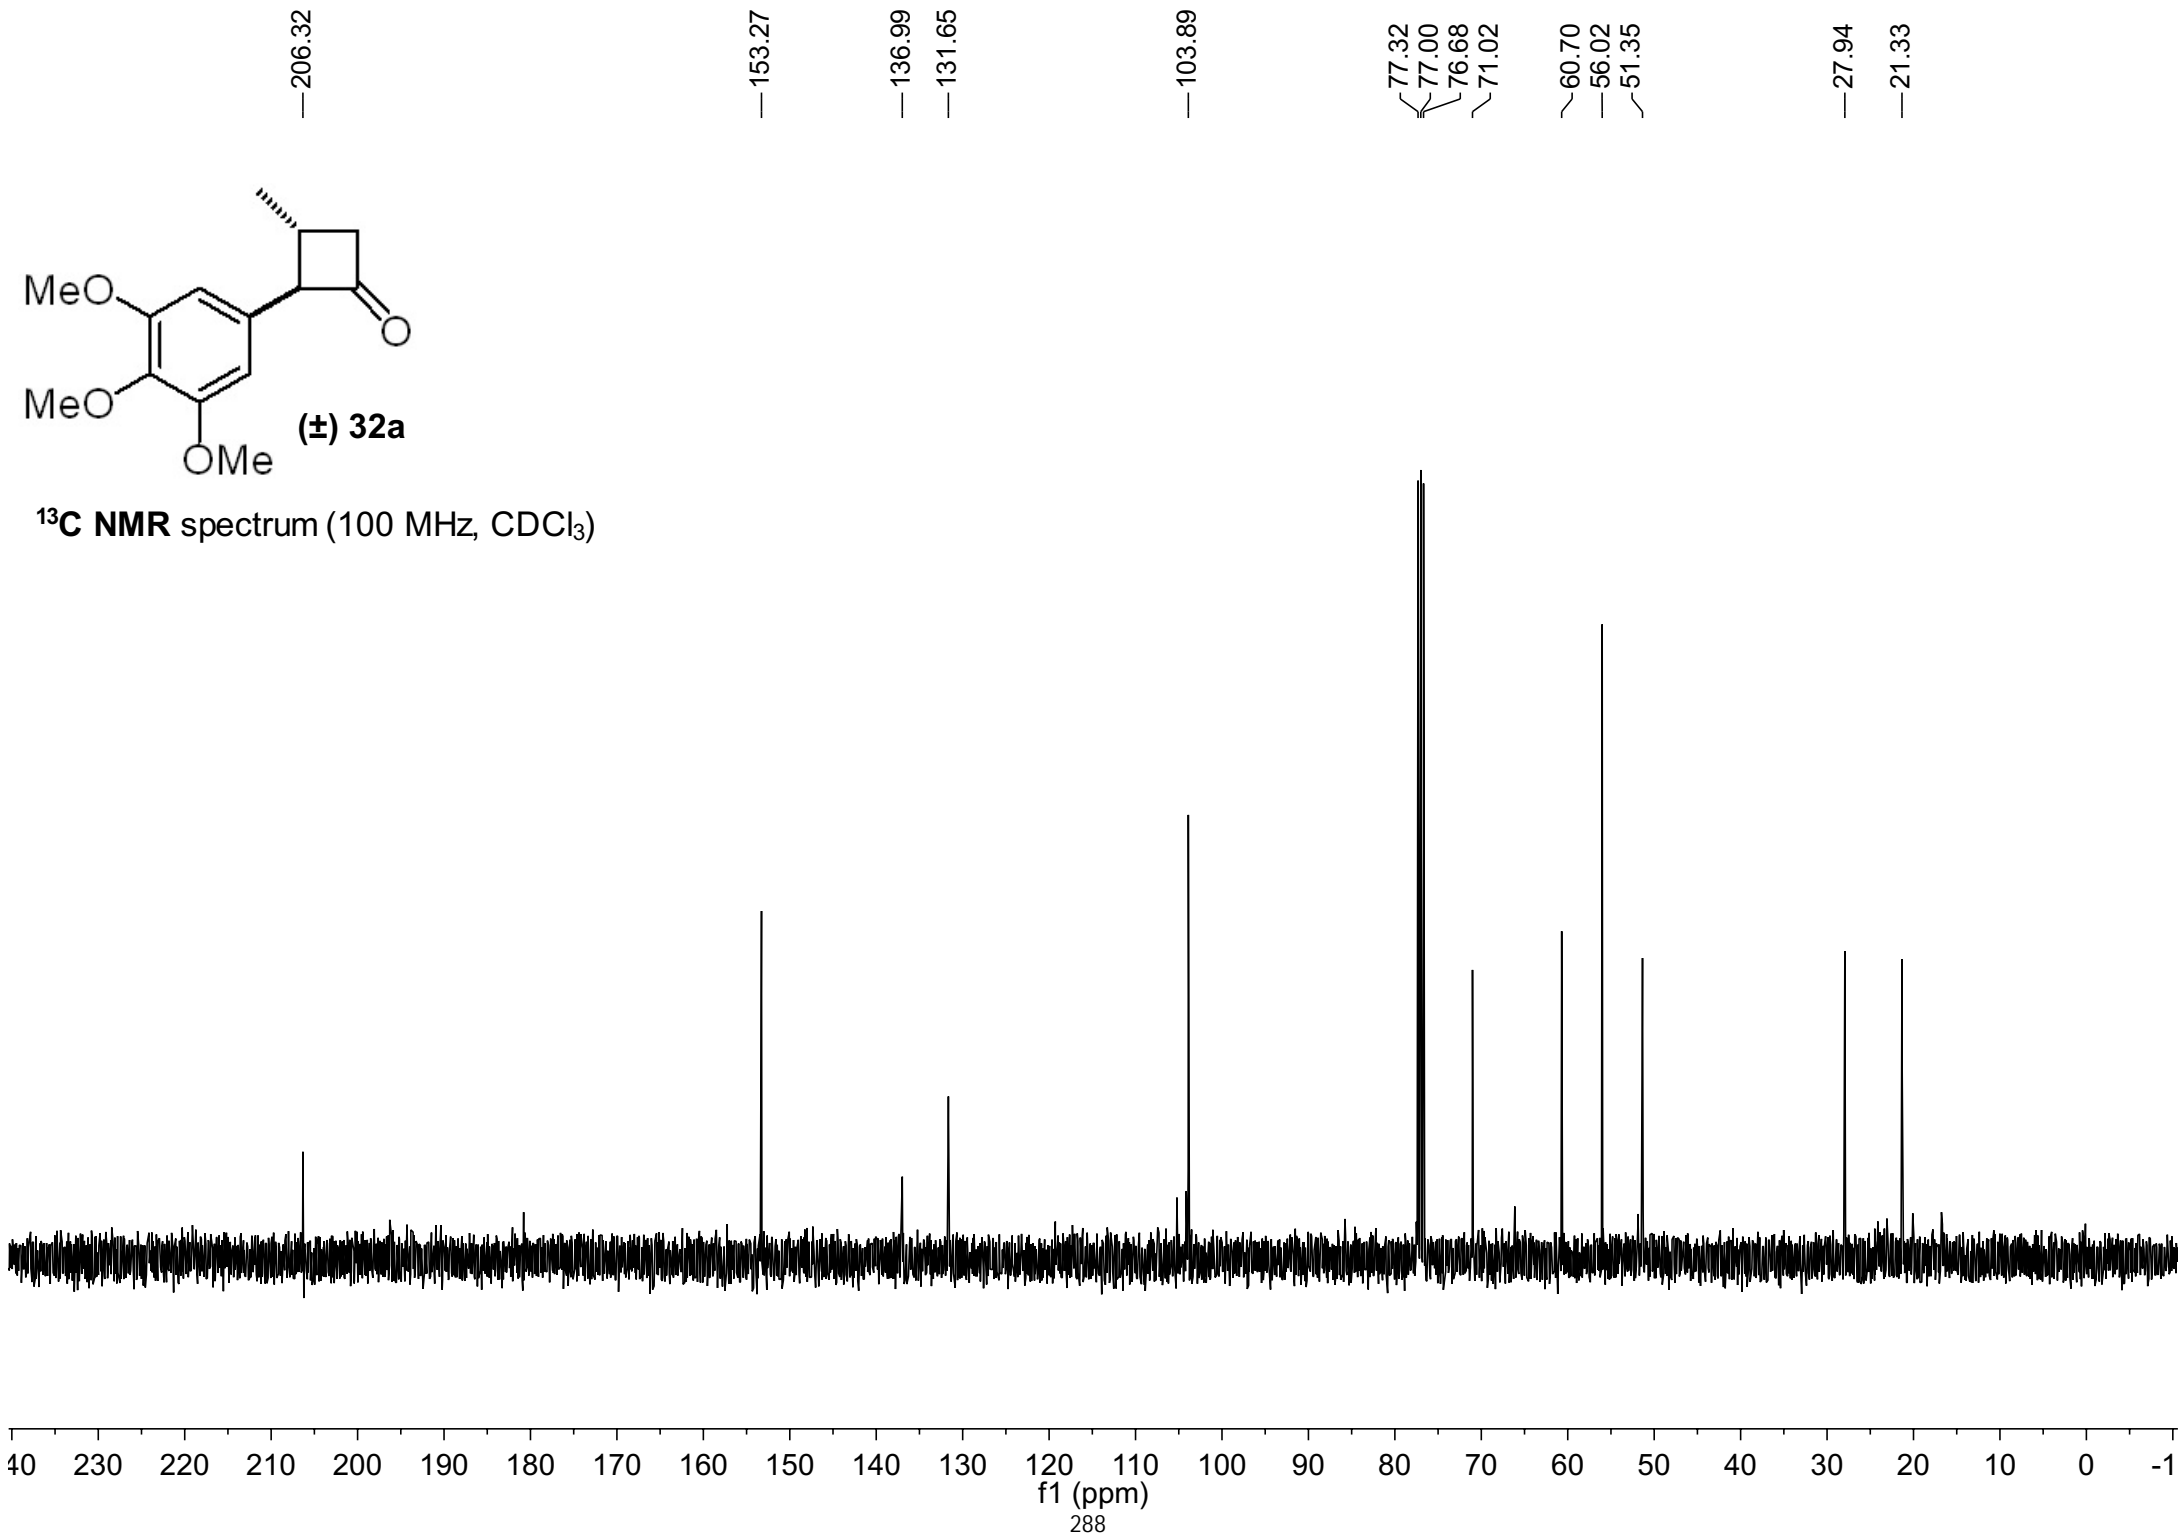

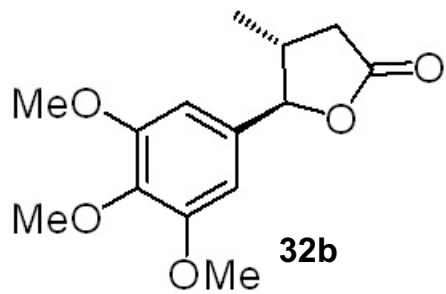

<sup>1</sup>H NMR spectrum (400 MHz, CDCl<sub>3</sub>)

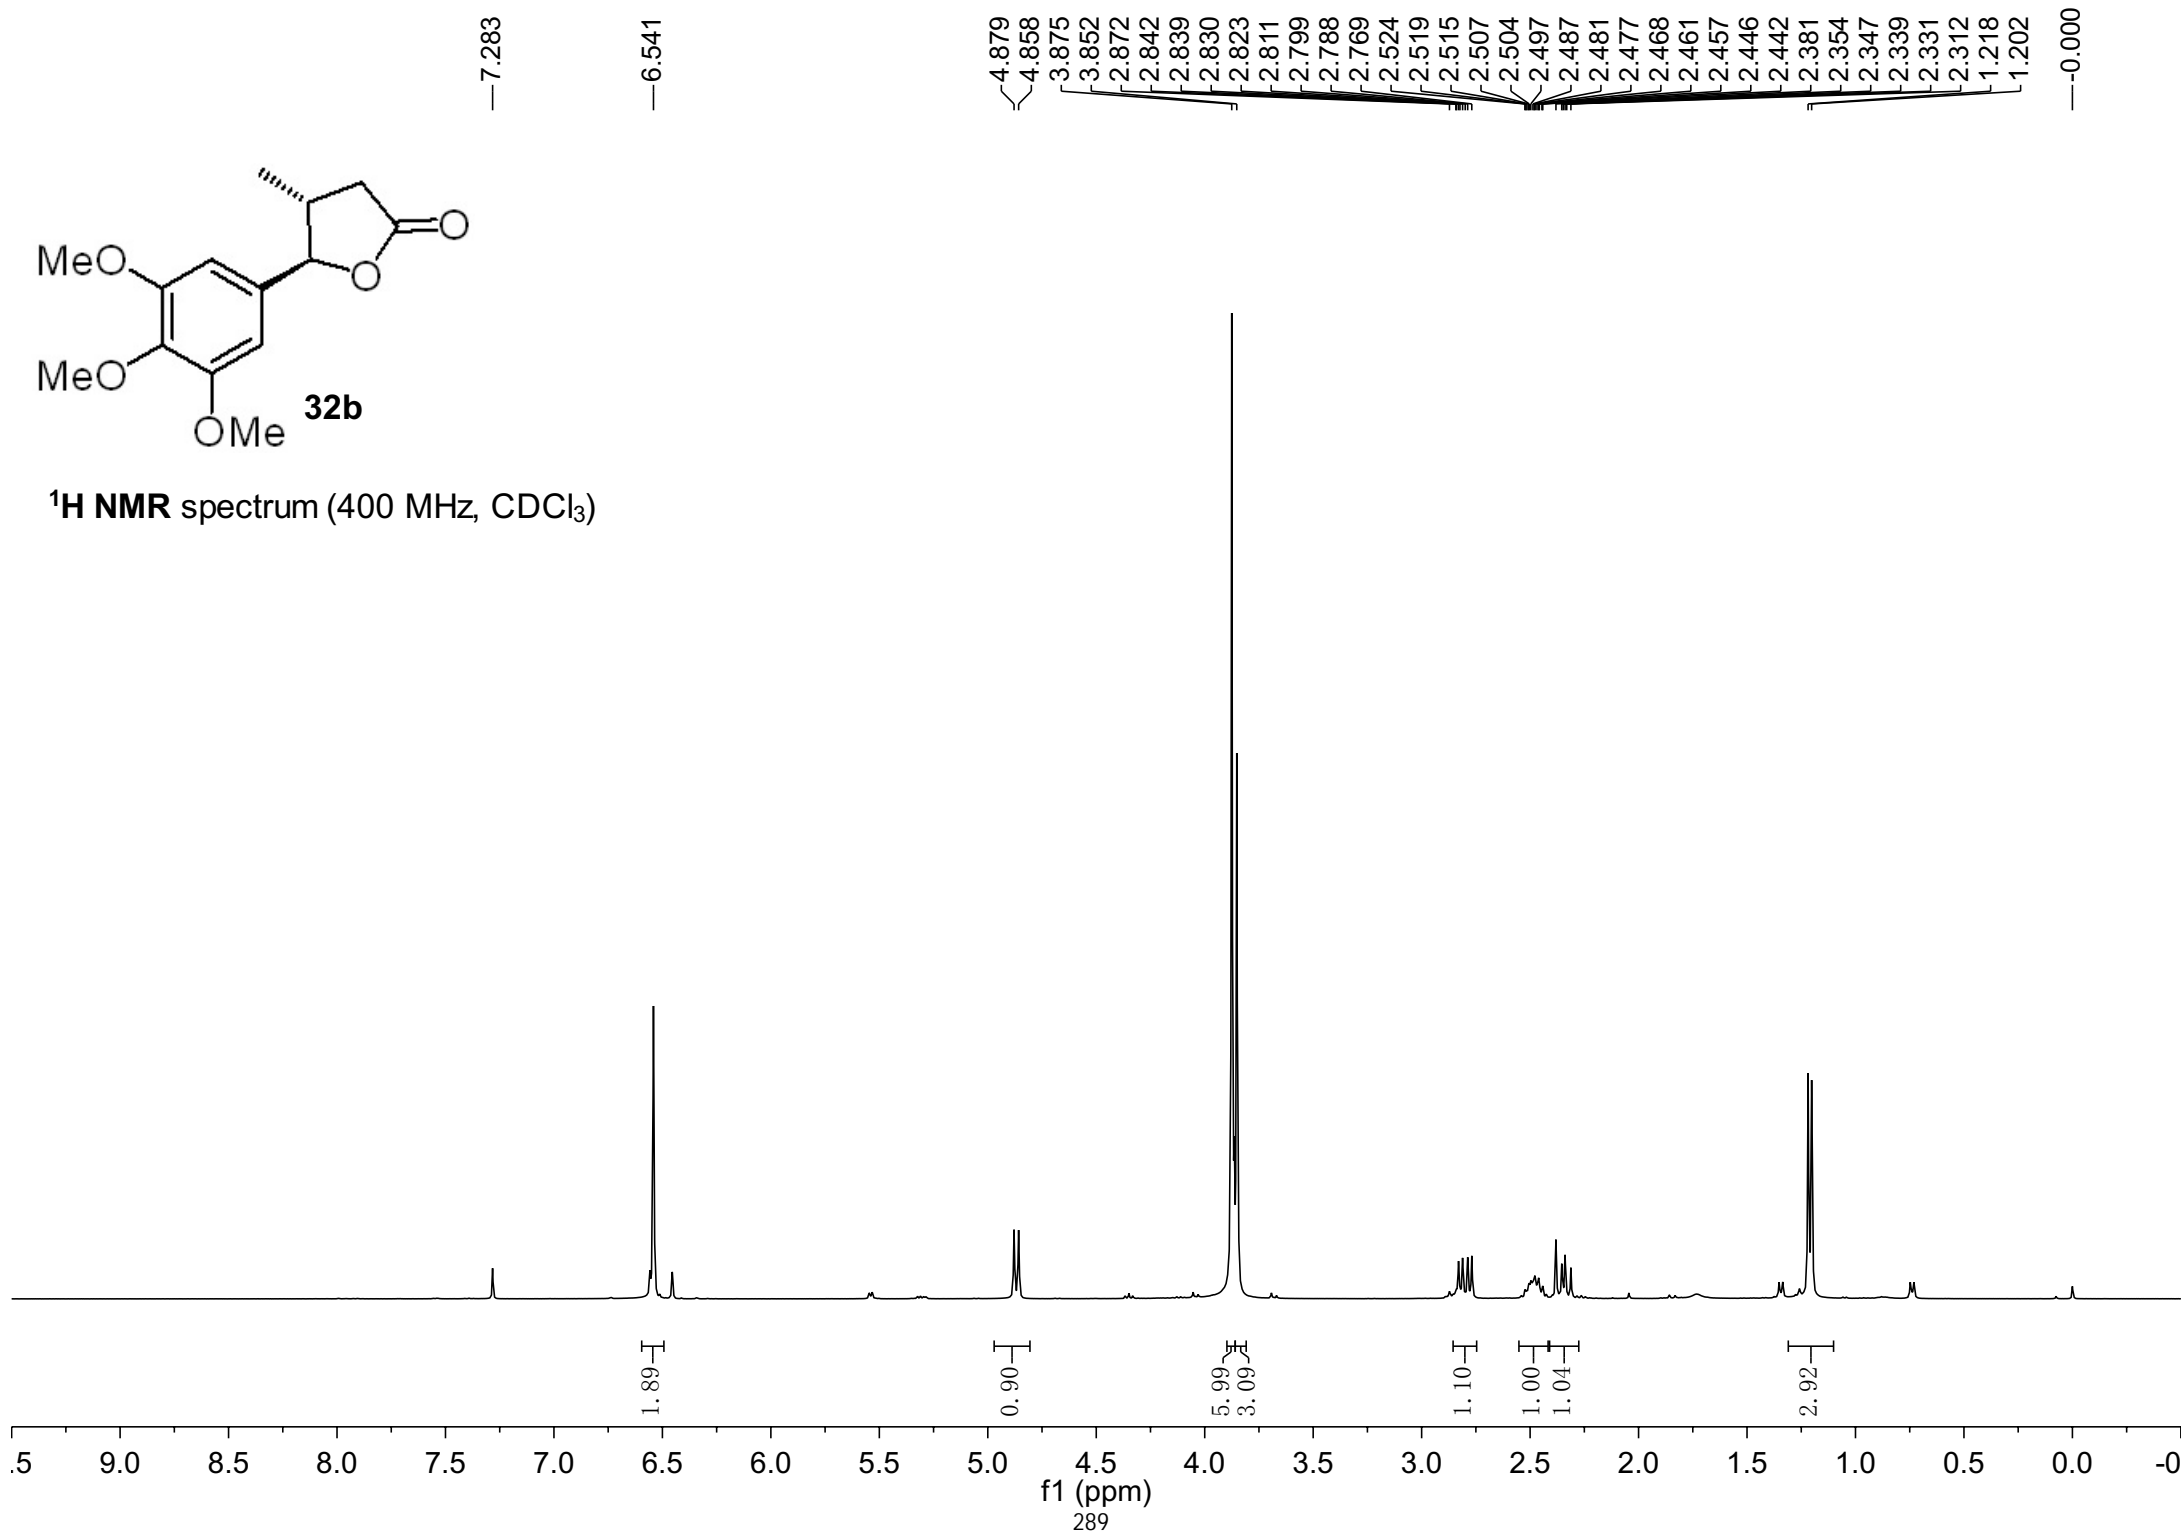

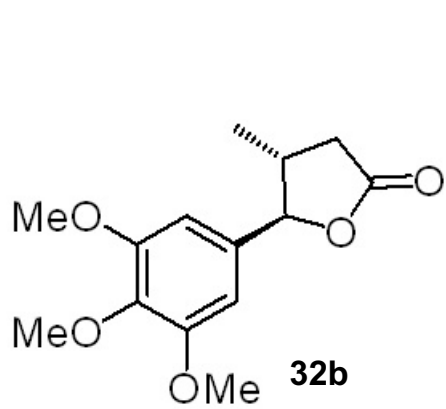

<sup>13</sup>C NMR spectrum (100 MHz, CDCl<sub>3</sub>)

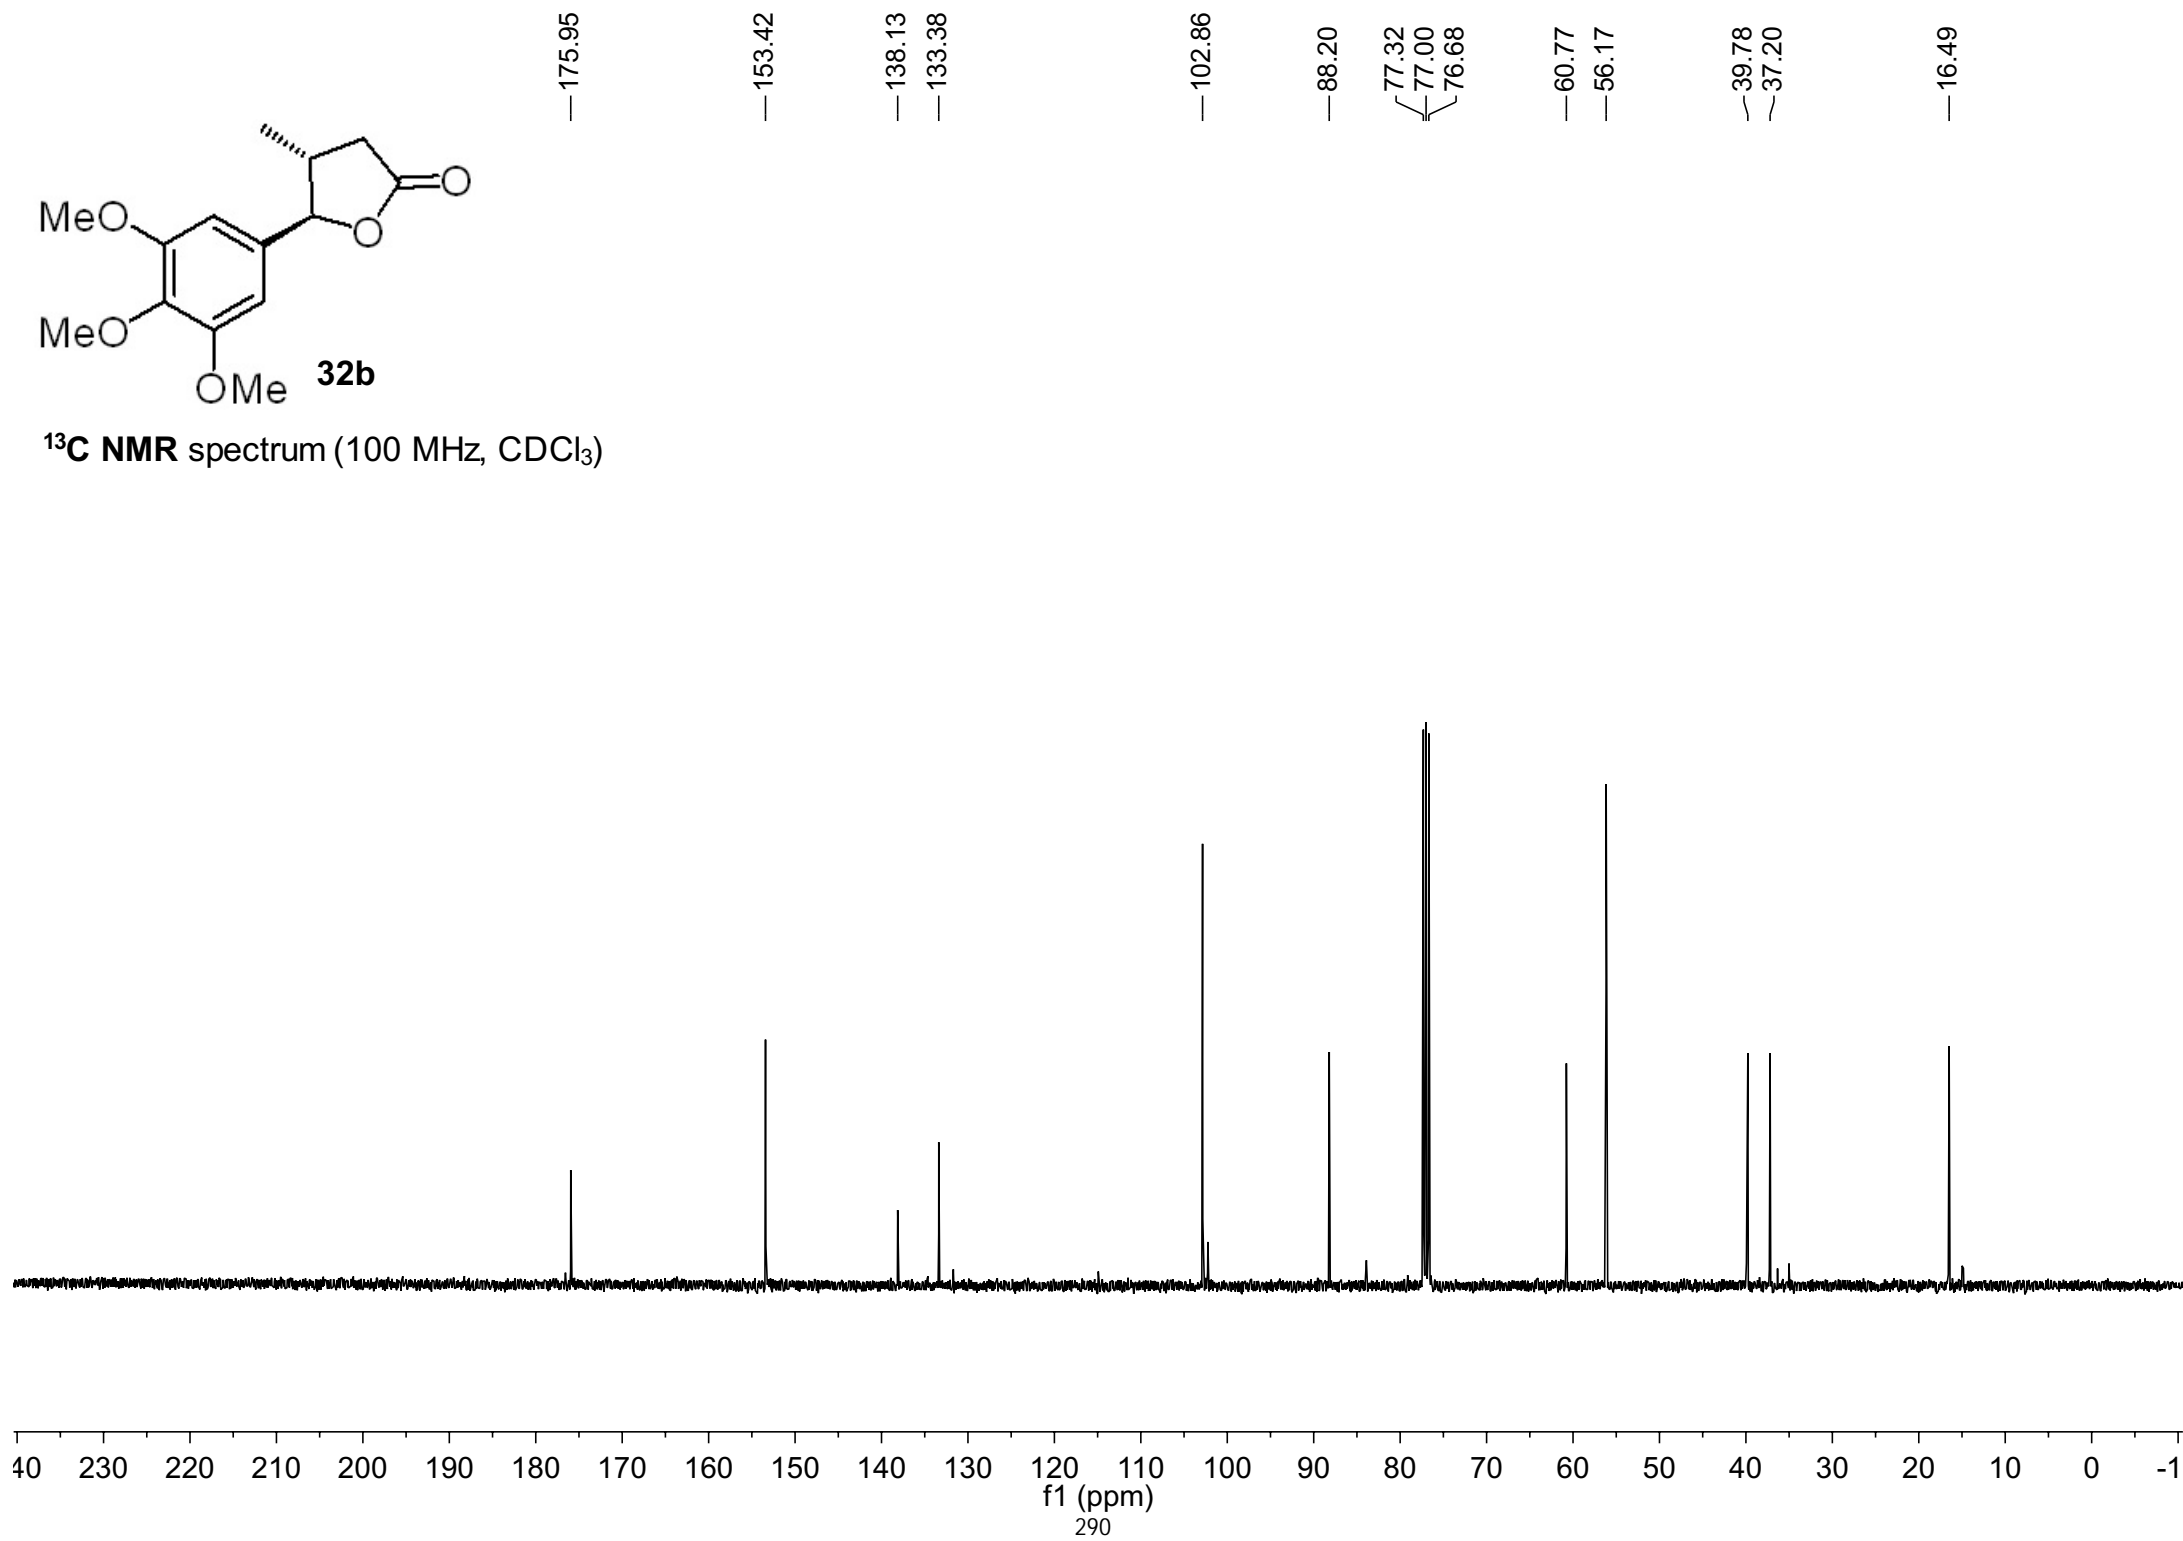

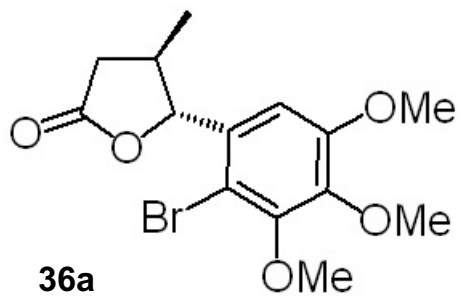

<sup>1</sup>H NMR spectrum (600 MHz, CDCl<sub>3</sub>)

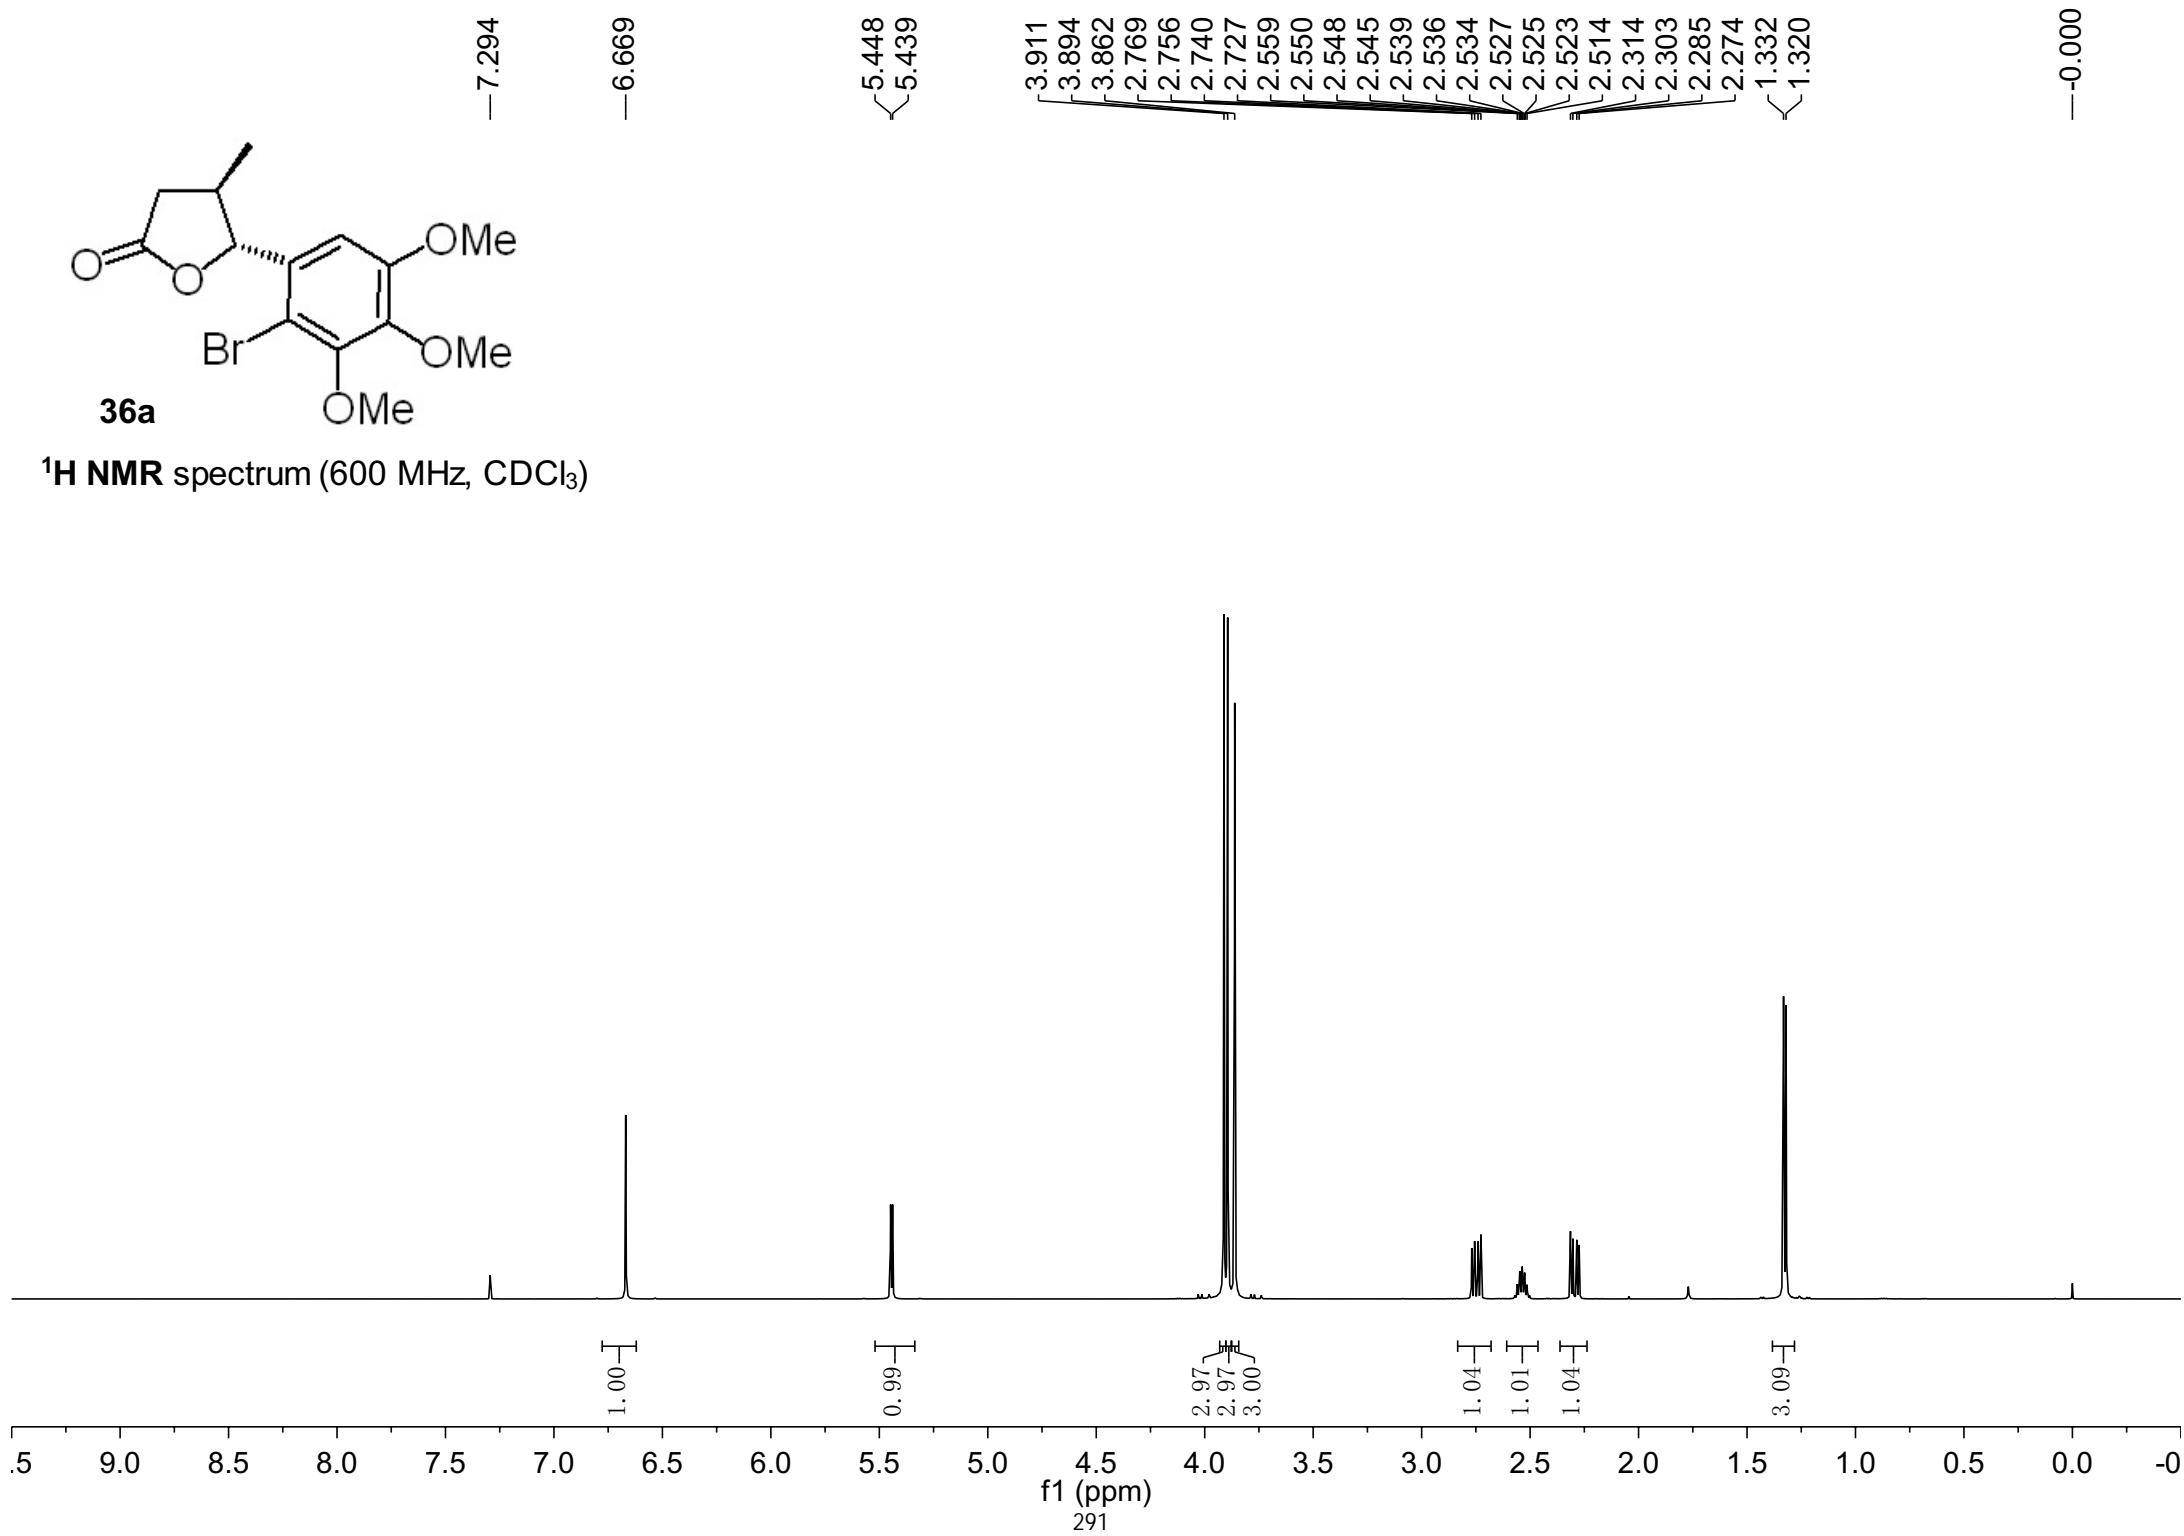



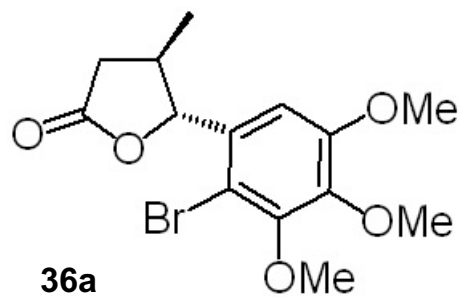

—176.59  
~153.17  
~150.92  
—142.97  
—133.43  
~108.17  
~105.10  
—85.97  
77.21  
77.00  
76.79  
—60.97  
—56.19  
~38.86  
~35.80  
—18.19

<sup>13</sup>C NMR spectrum (150 MHz, CDCl<sub>3</sub>)

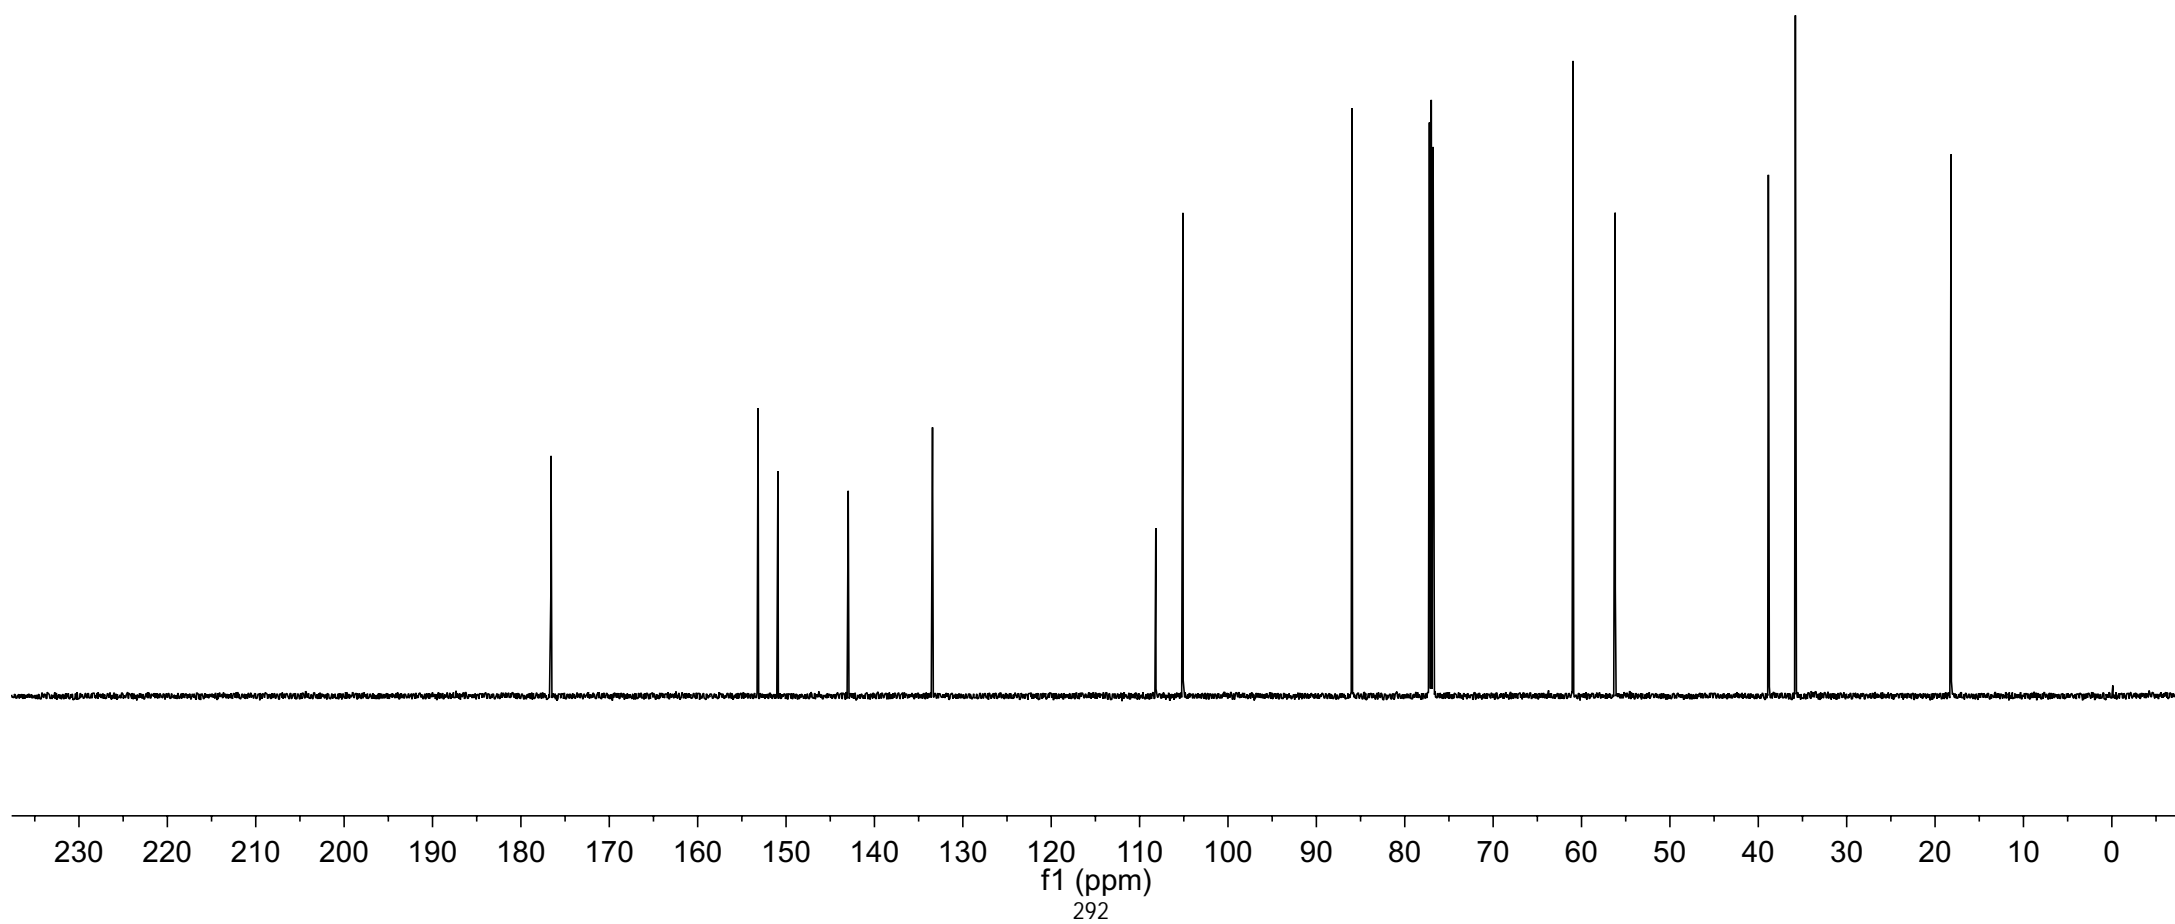

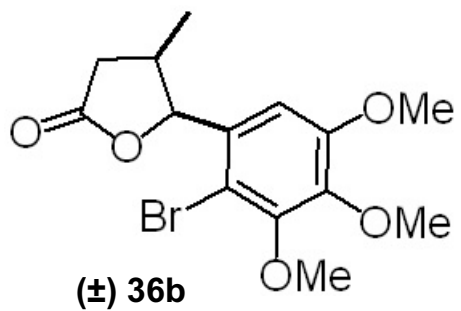

<sup>1</sup>H NMR spectrum (600 MHz, CDCl<sub>3</sub>)

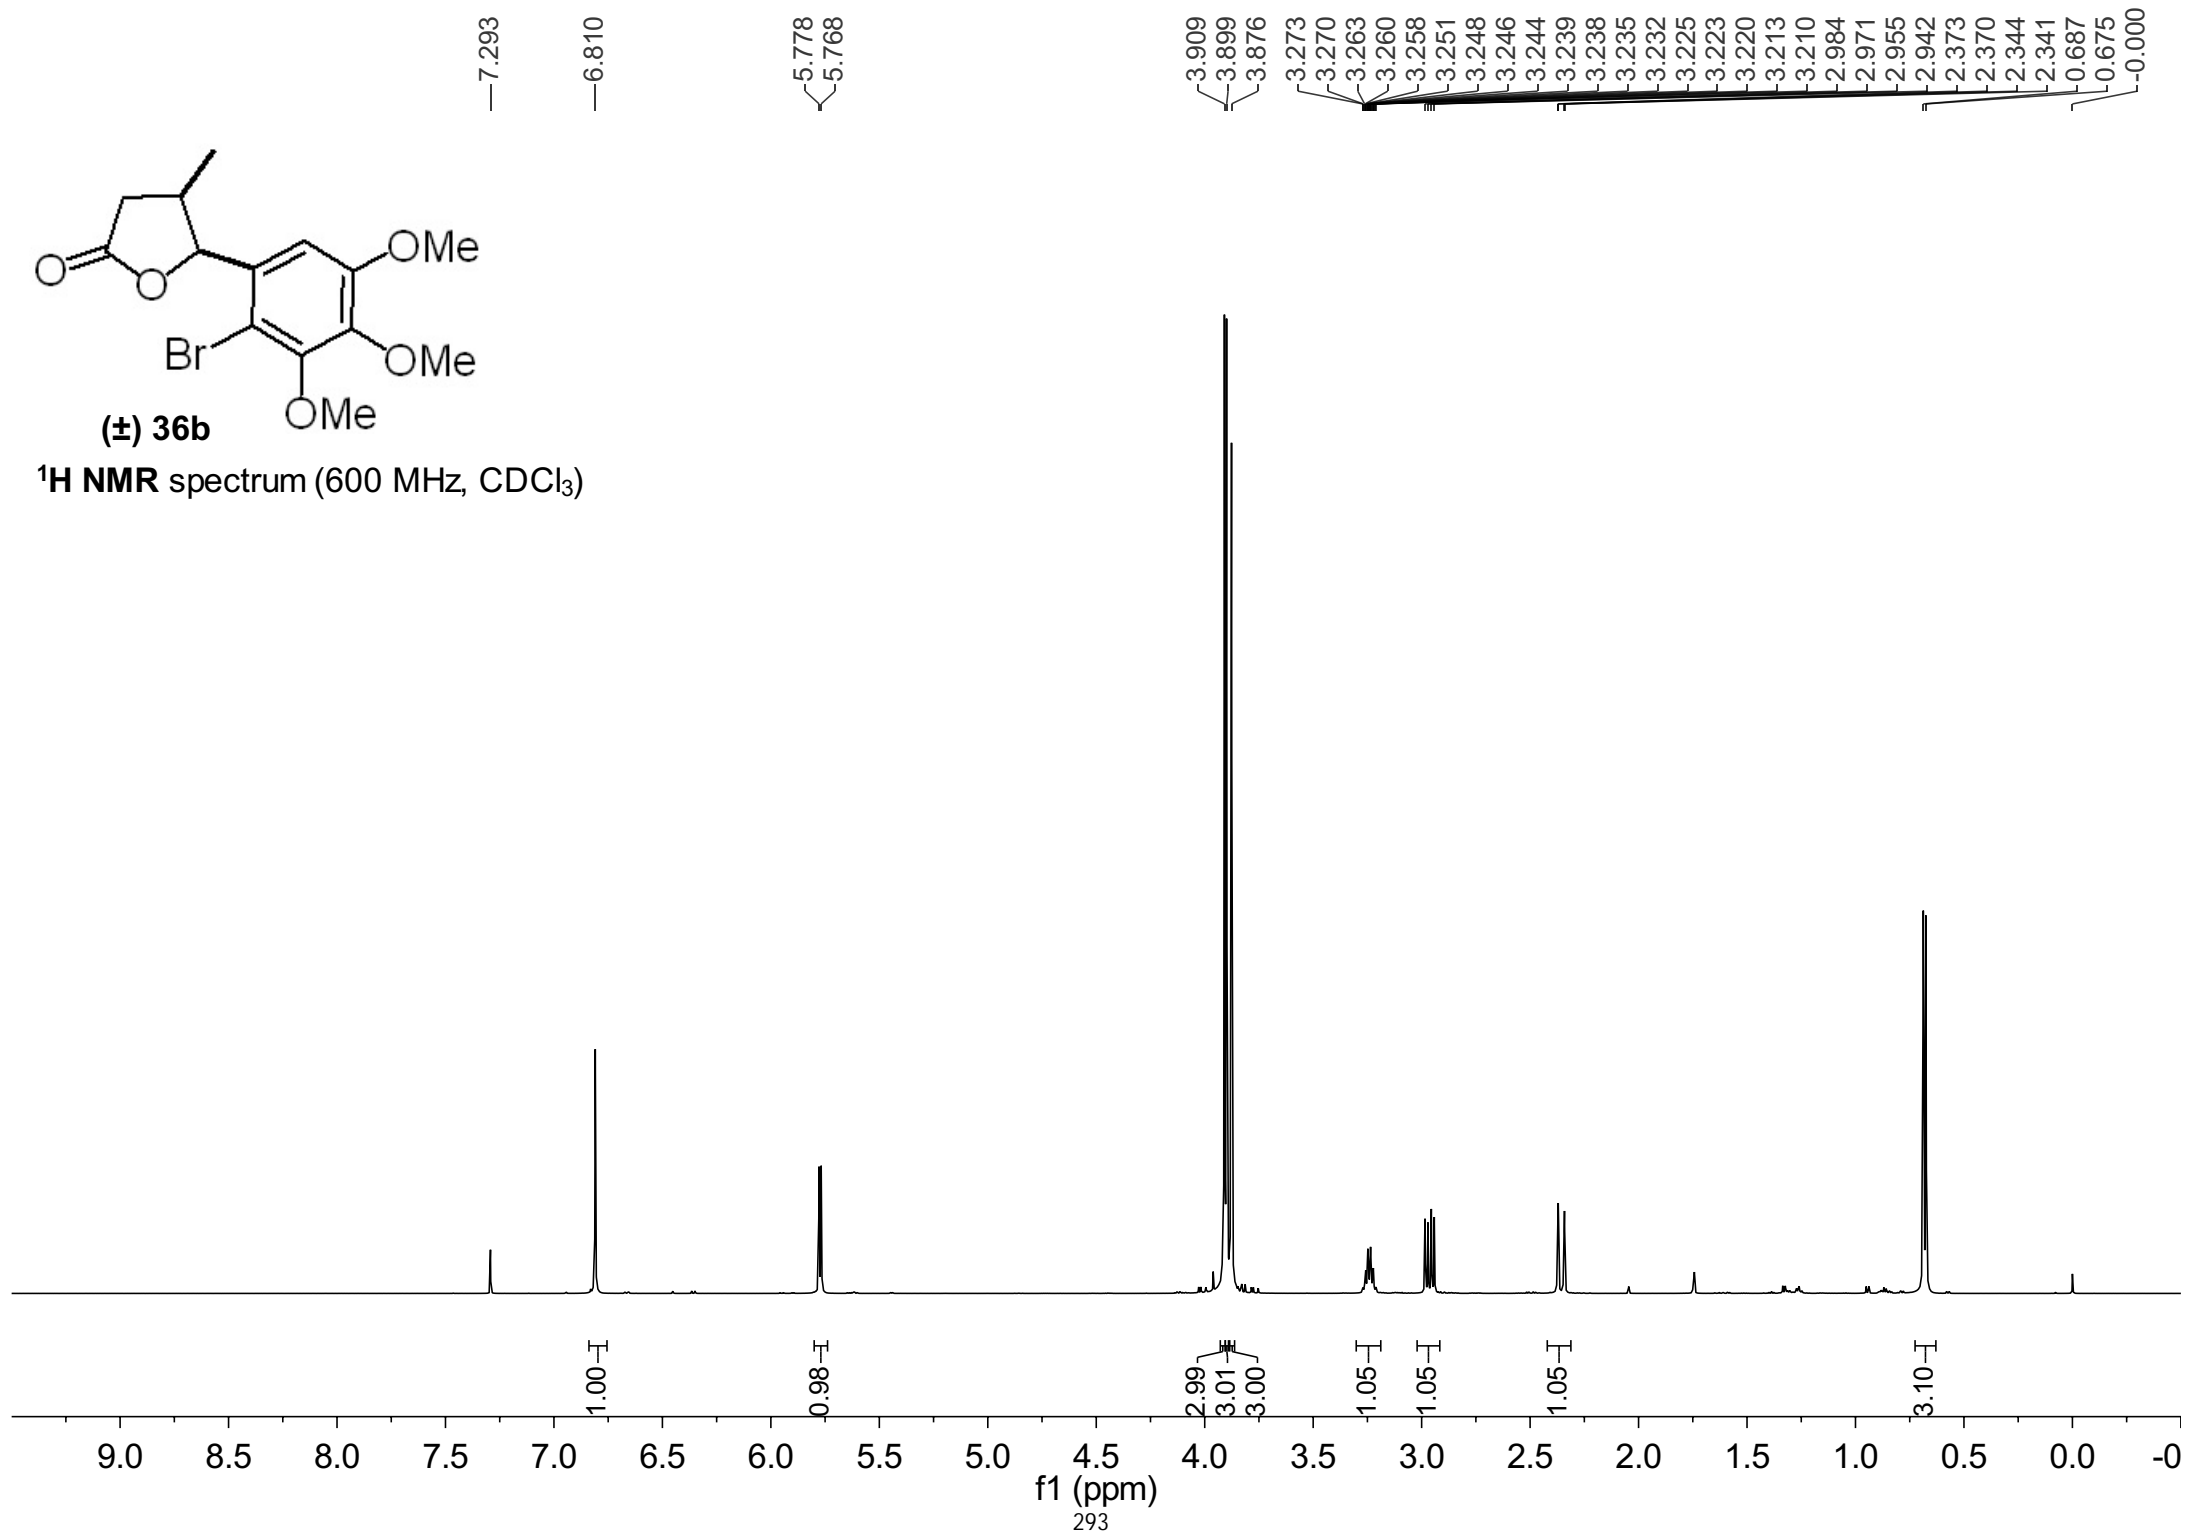

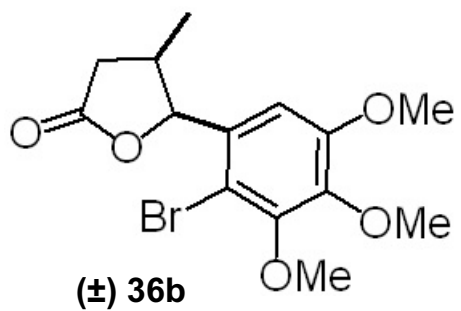

<sup>13</sup>C NMR spectrum (150 MHz, CDCl<sub>3</sub>)

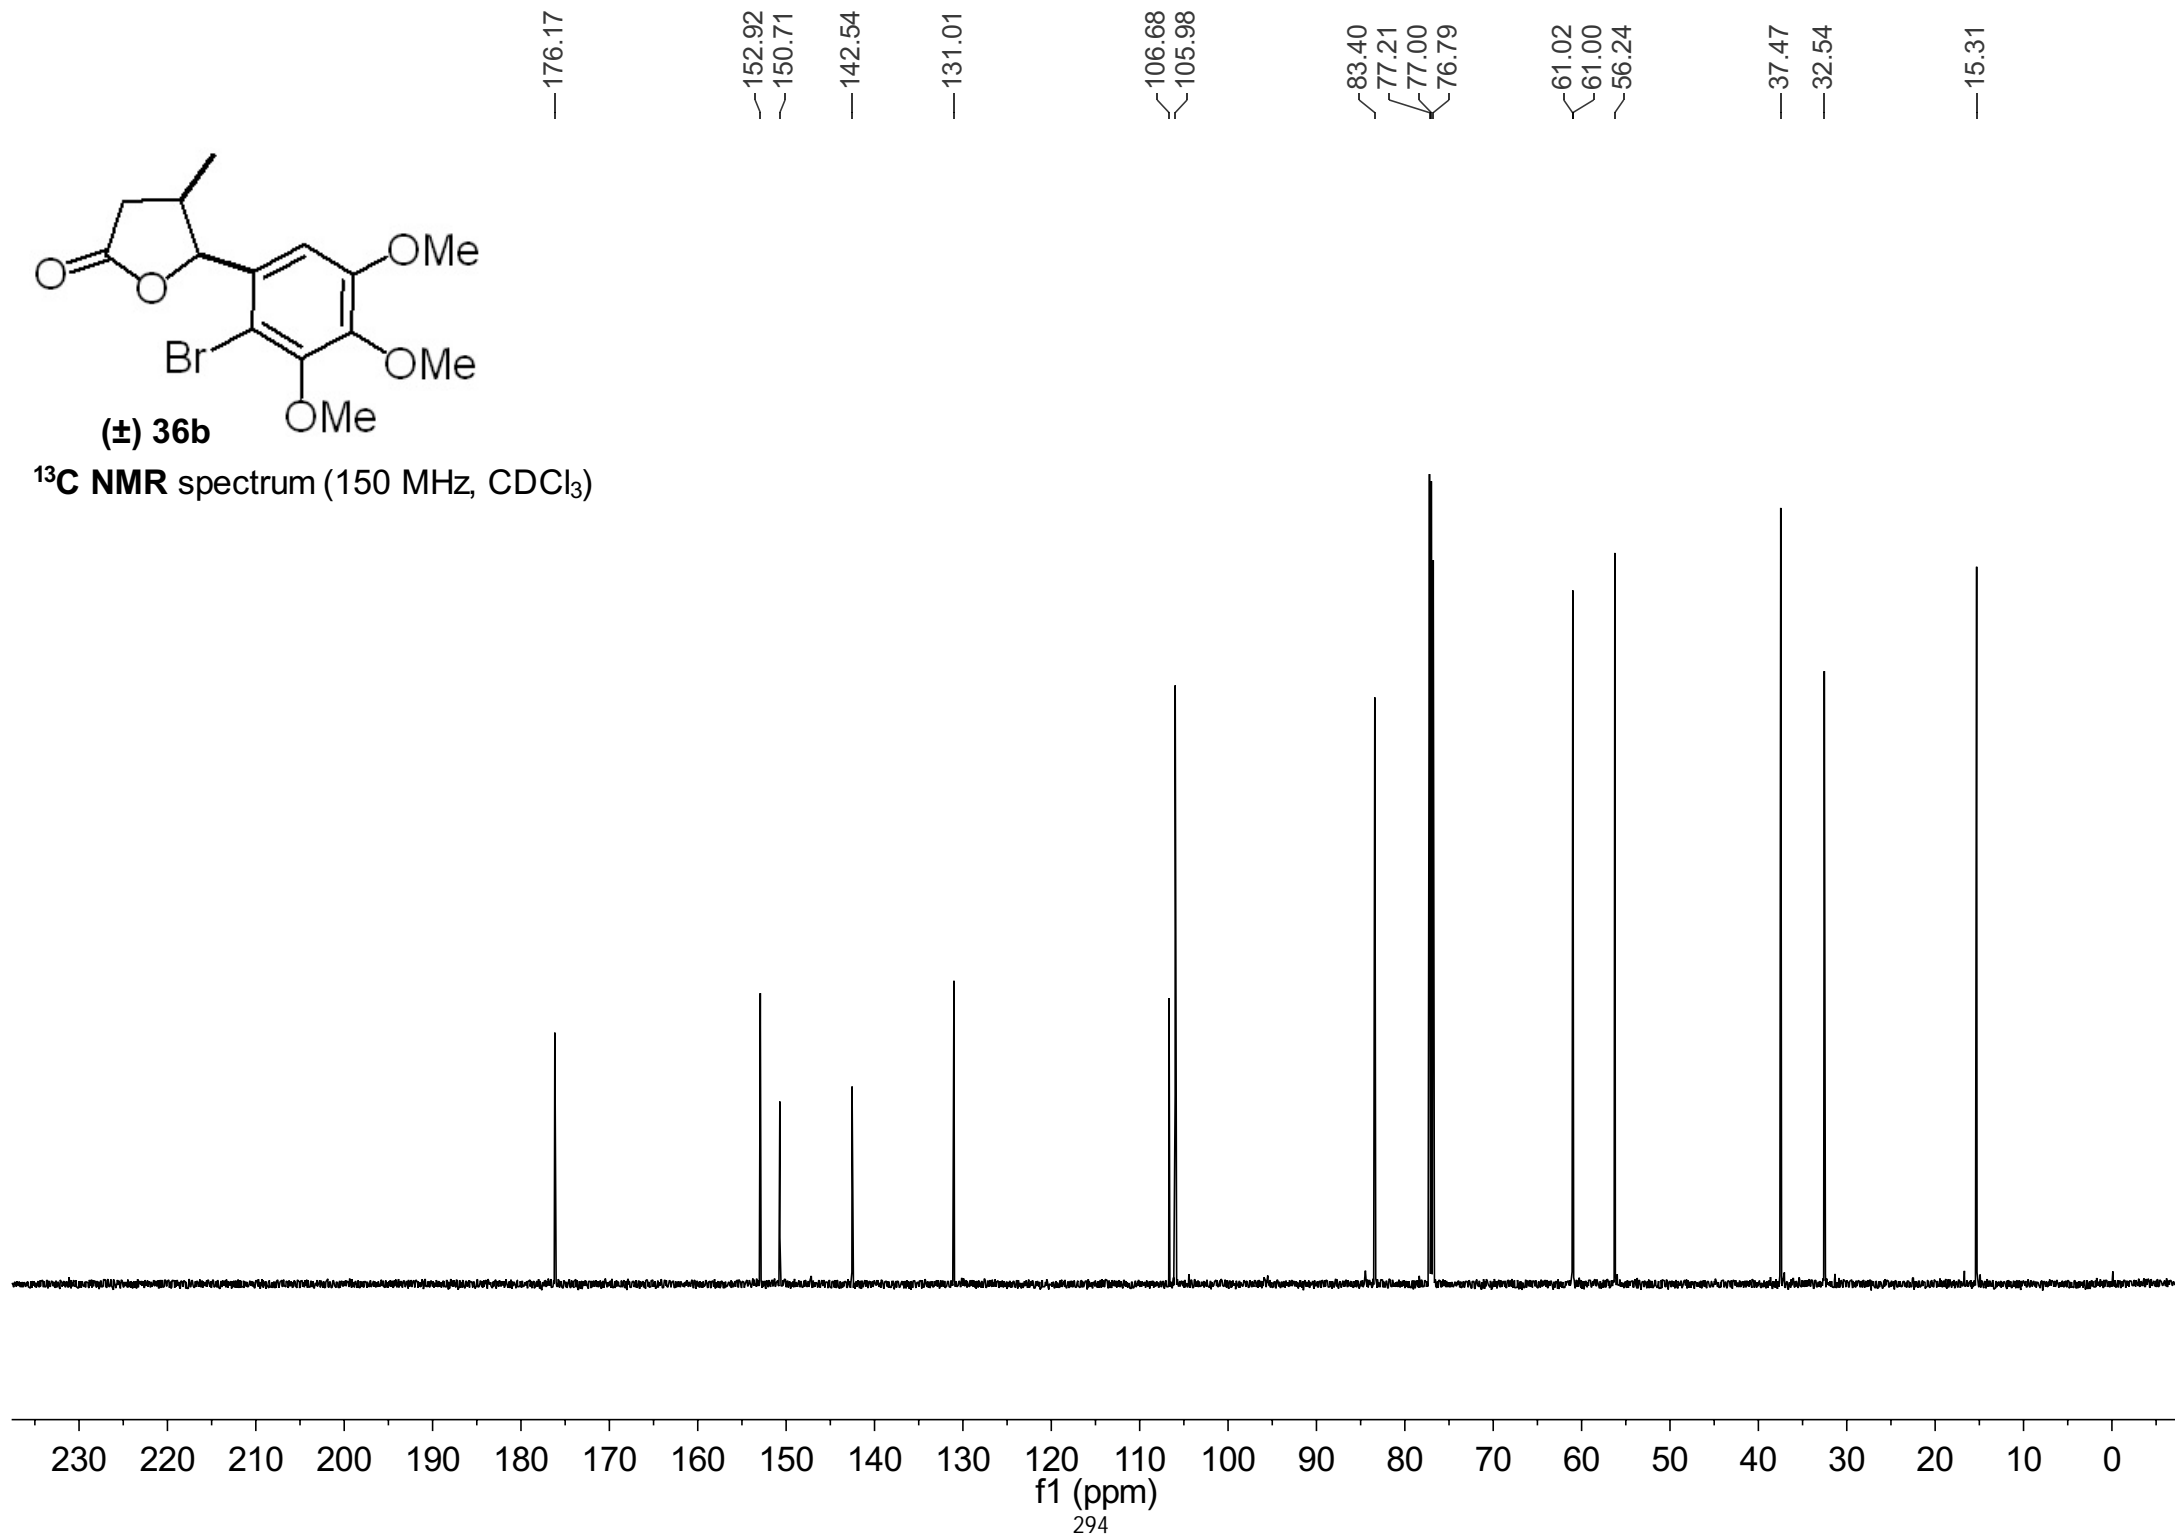

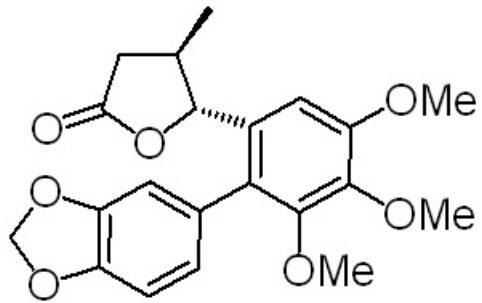

**36**

<sup>1</sup>H NMR spectrum (400 MHz, CDCl<sub>3</sub>)

7.274  
6.887  
6.885  
6.882  
6.868  
6.866  
6.862  
6.739  
6.735  
6.721  
6.717  
6.710  
6.697  
6.651  
6.647  
6.631  
6.627  
6.036  
6.033  
6.030  
6.026  
6.021  
6.017  
6.014

4.990  
4.971  
4.940  
4.922

3.912  
3.910  
3.903  
3.644  
3.635  
2.760  
2.748  
2.740  
2.728  
2.717  
2.705  
2.697  
2.685  
2.507  
2.504  
2.490  
2.487  
2.484  
2.471  
2.467  
2.464  
2.451  
2.448  
2.197  
2.190  
2.173  
2.167  
2.154  
2.147  
2.130  
2.124  
0.886  
0.872  
0.869  
0.855  
0.000

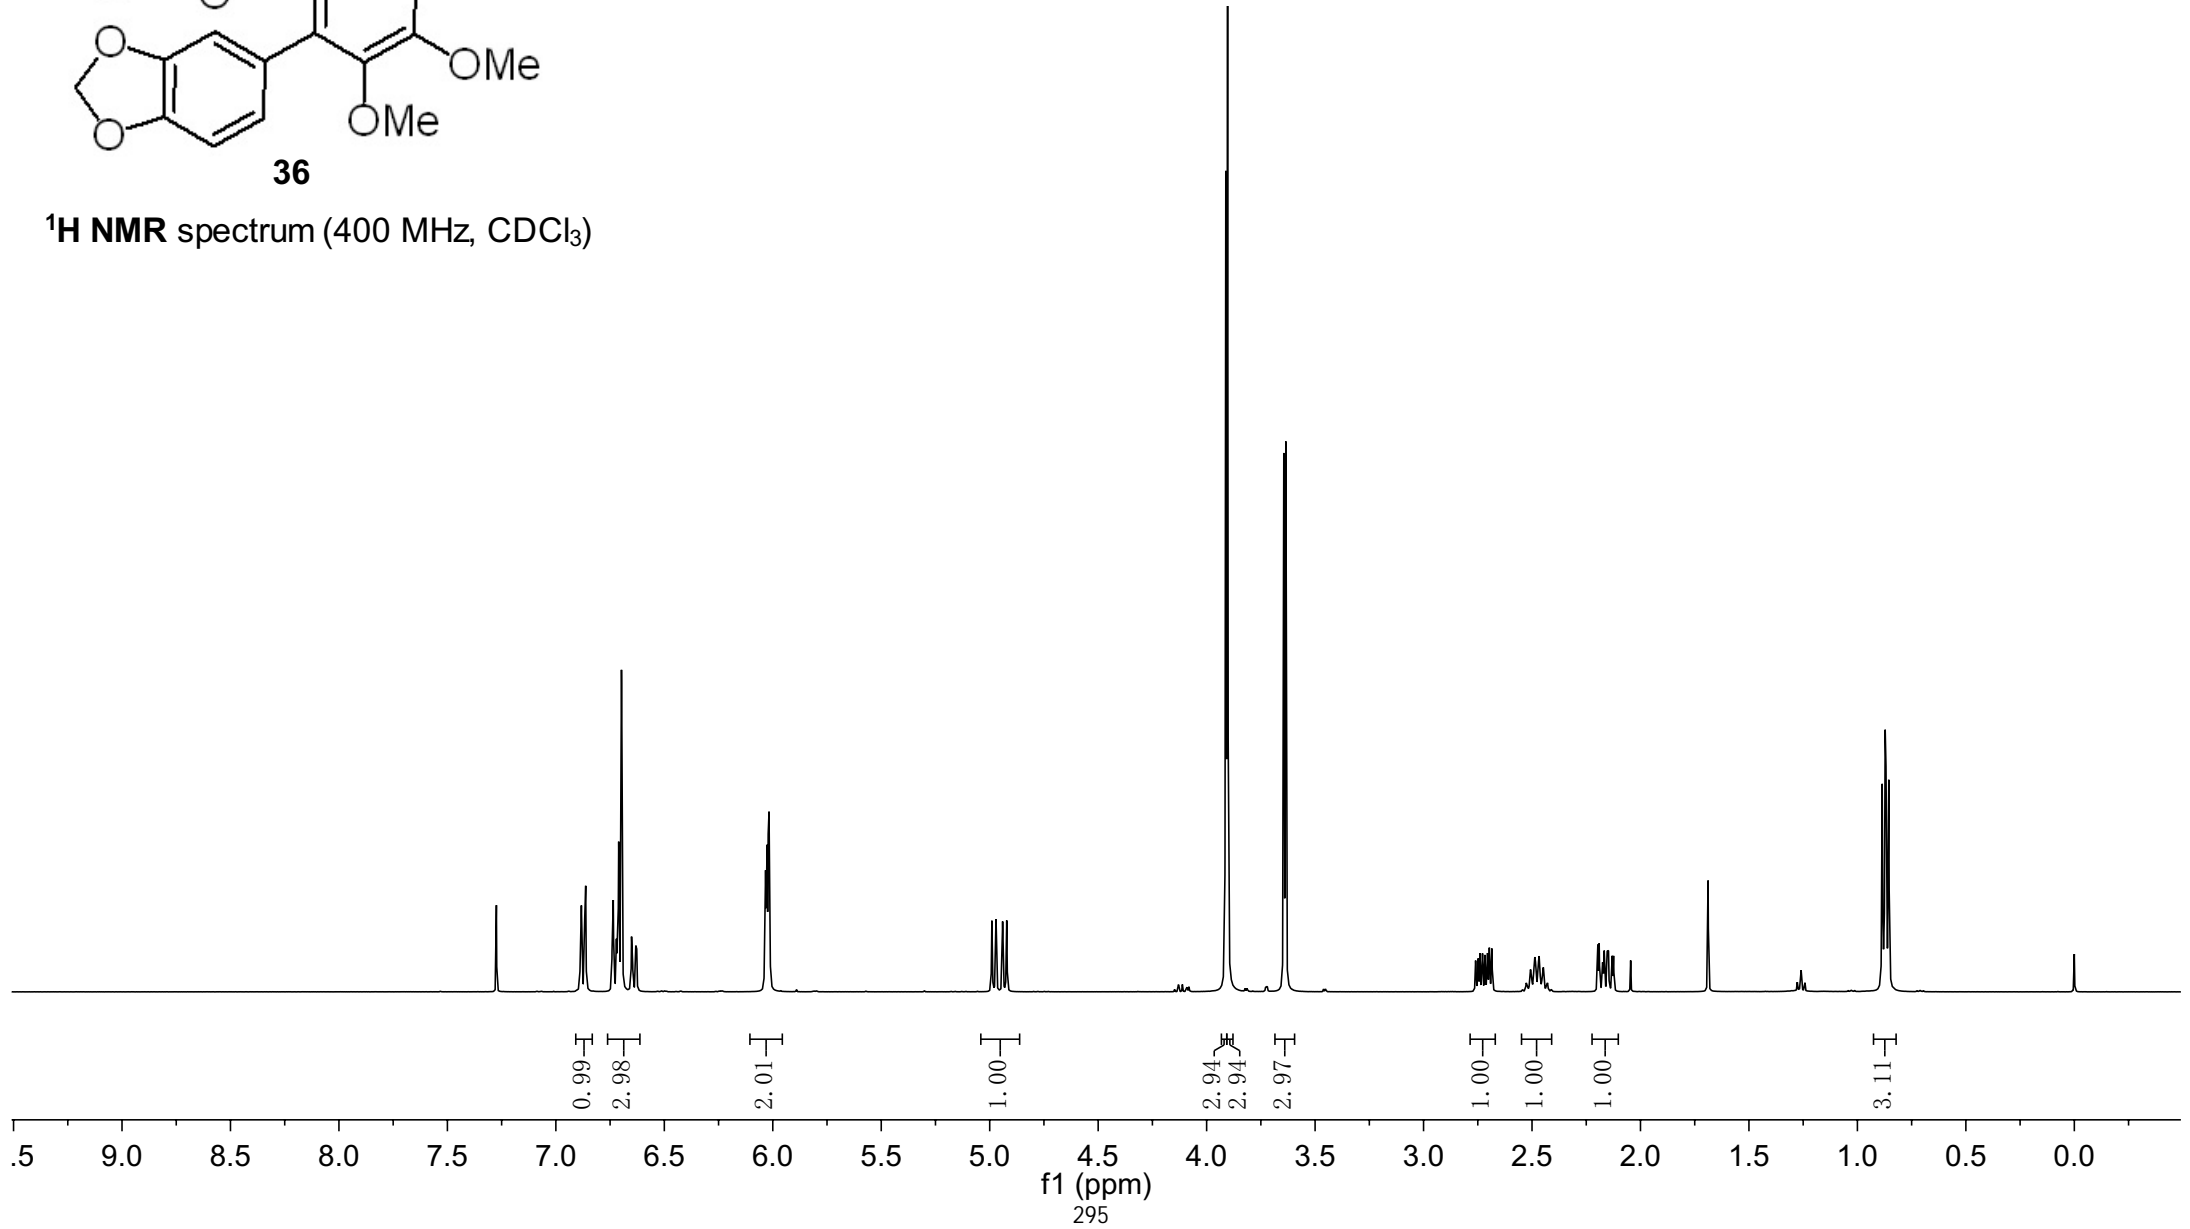

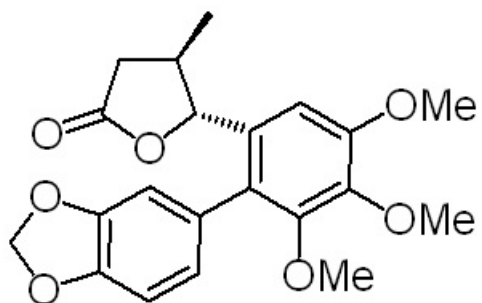

**36**

<sup>13</sup>C NMR spectrum (100 MHz, CDCl<sub>3</sub>)

176.42  
176.38  
153.20  
153.17  
151.39  
151.35  
147.52  
147.44  
146.89  
146.83  
142.31  
142.29  
131.73  
131.62  
128.84  
128.82  
128.77  
124.14  
123.14  
111.22  
110.33  
108.24  
107.95  
104.41  
101.13  
101.09  
84.73  
84.66  
77.32  
77.00  
76.68  
61.09  
61.00  
60.81  
56.10  
39.22  
39.19  
36.87  
36.84  
-16.75

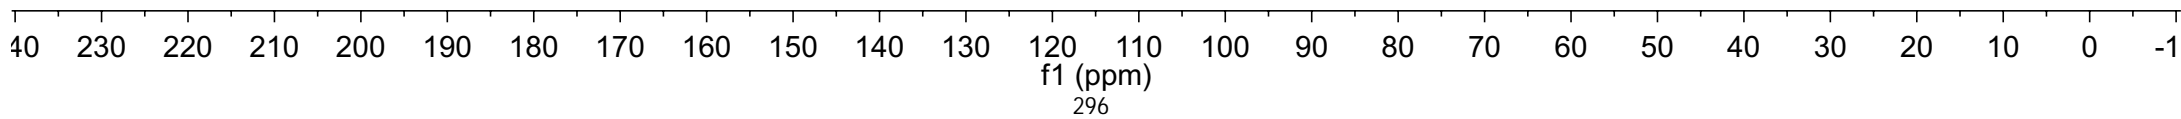

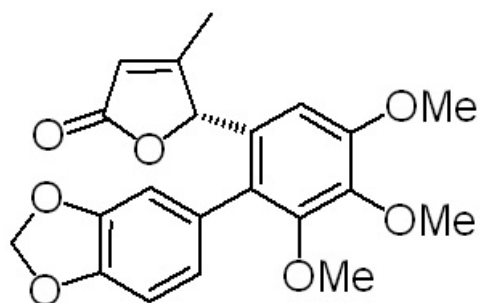

**37a**

<sup>1</sup>H NMR spectrum (400 MHz, CDCl<sub>3</sub>)

7.280  
6.903  
6.884  
6.865  
6.837  
6.833  
6.826  
6.822  
6.807  
6.803  
6.747  
6.744  
6.699  
6.695  
6.679  
6.675  
— 6.317  
6.031  
6.028  
6.020  
5.905  
5.699

3.918  
3.916  
3.828  
3.650  
3.645

1.868  
1.855

— 0.000

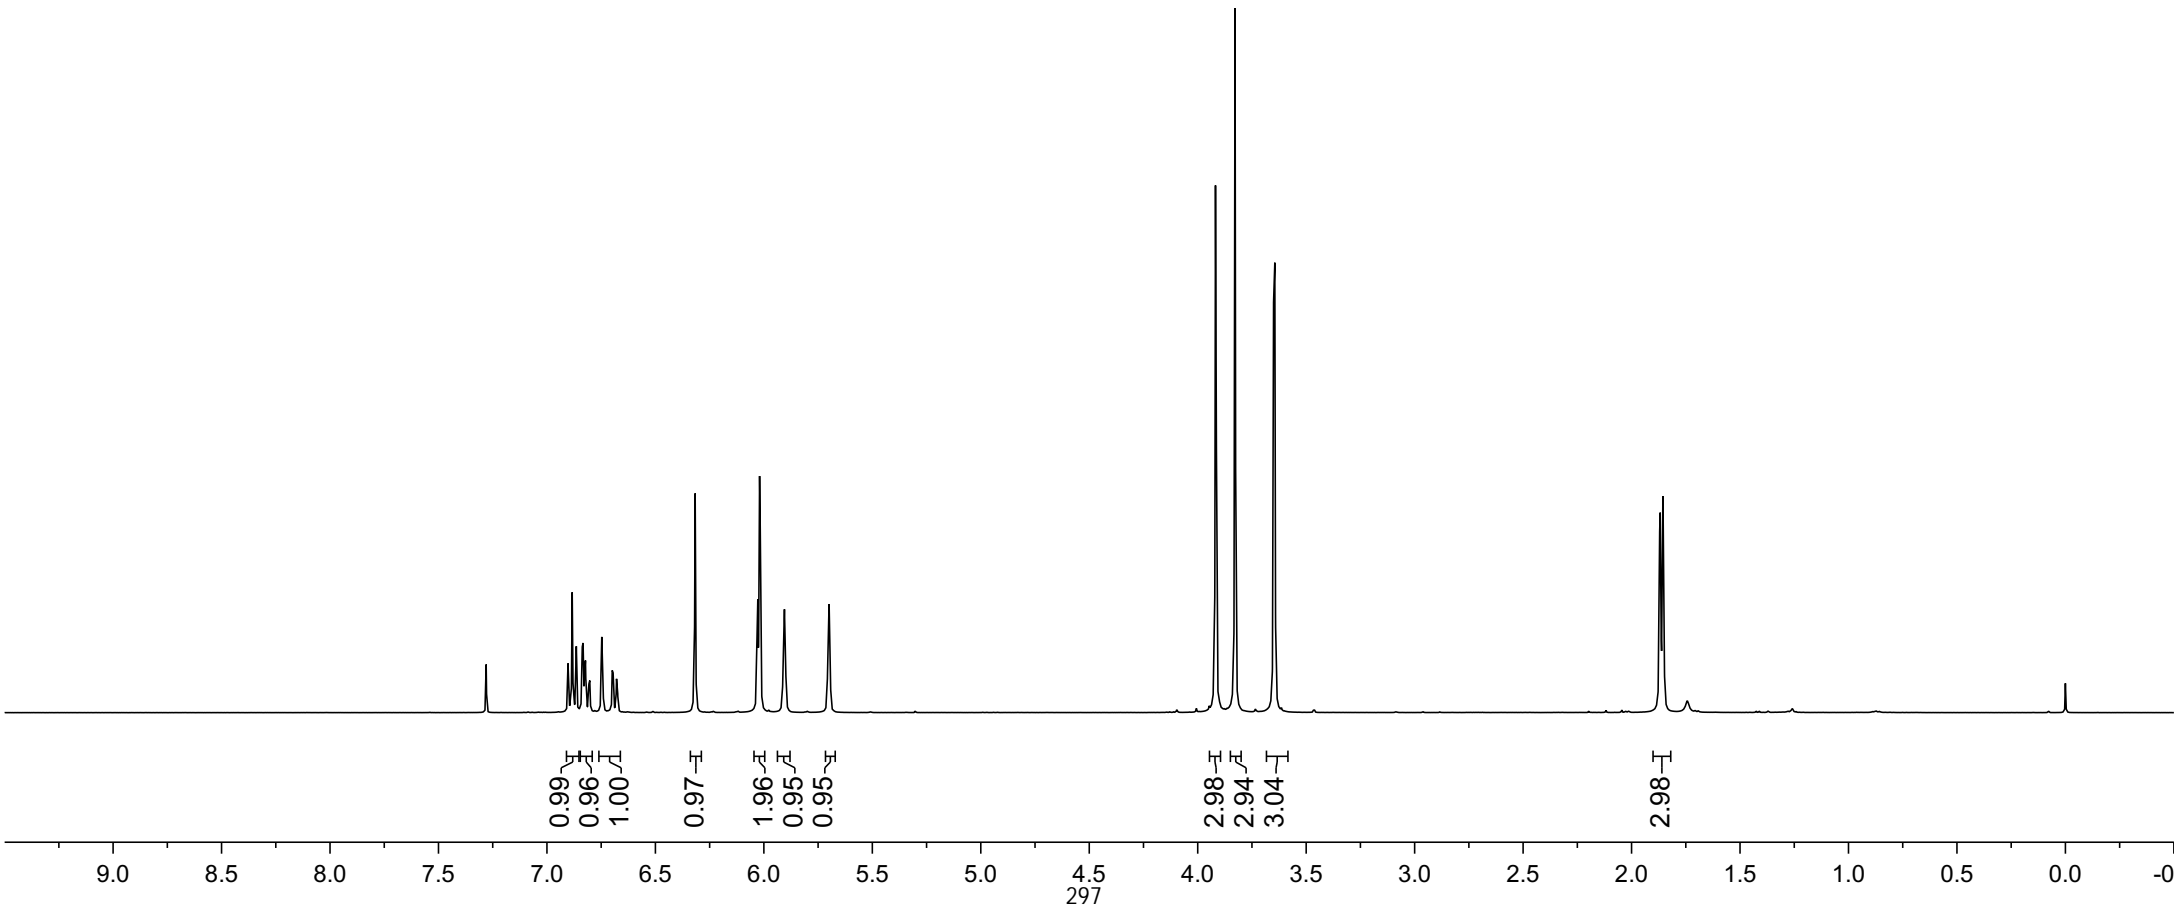

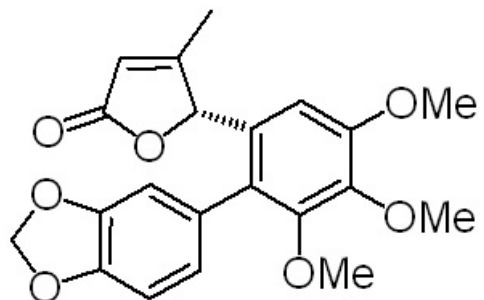

**37a**

<sup>13</sup>C NMR spectrum (100 MHz, CDCl<sub>3</sub>)

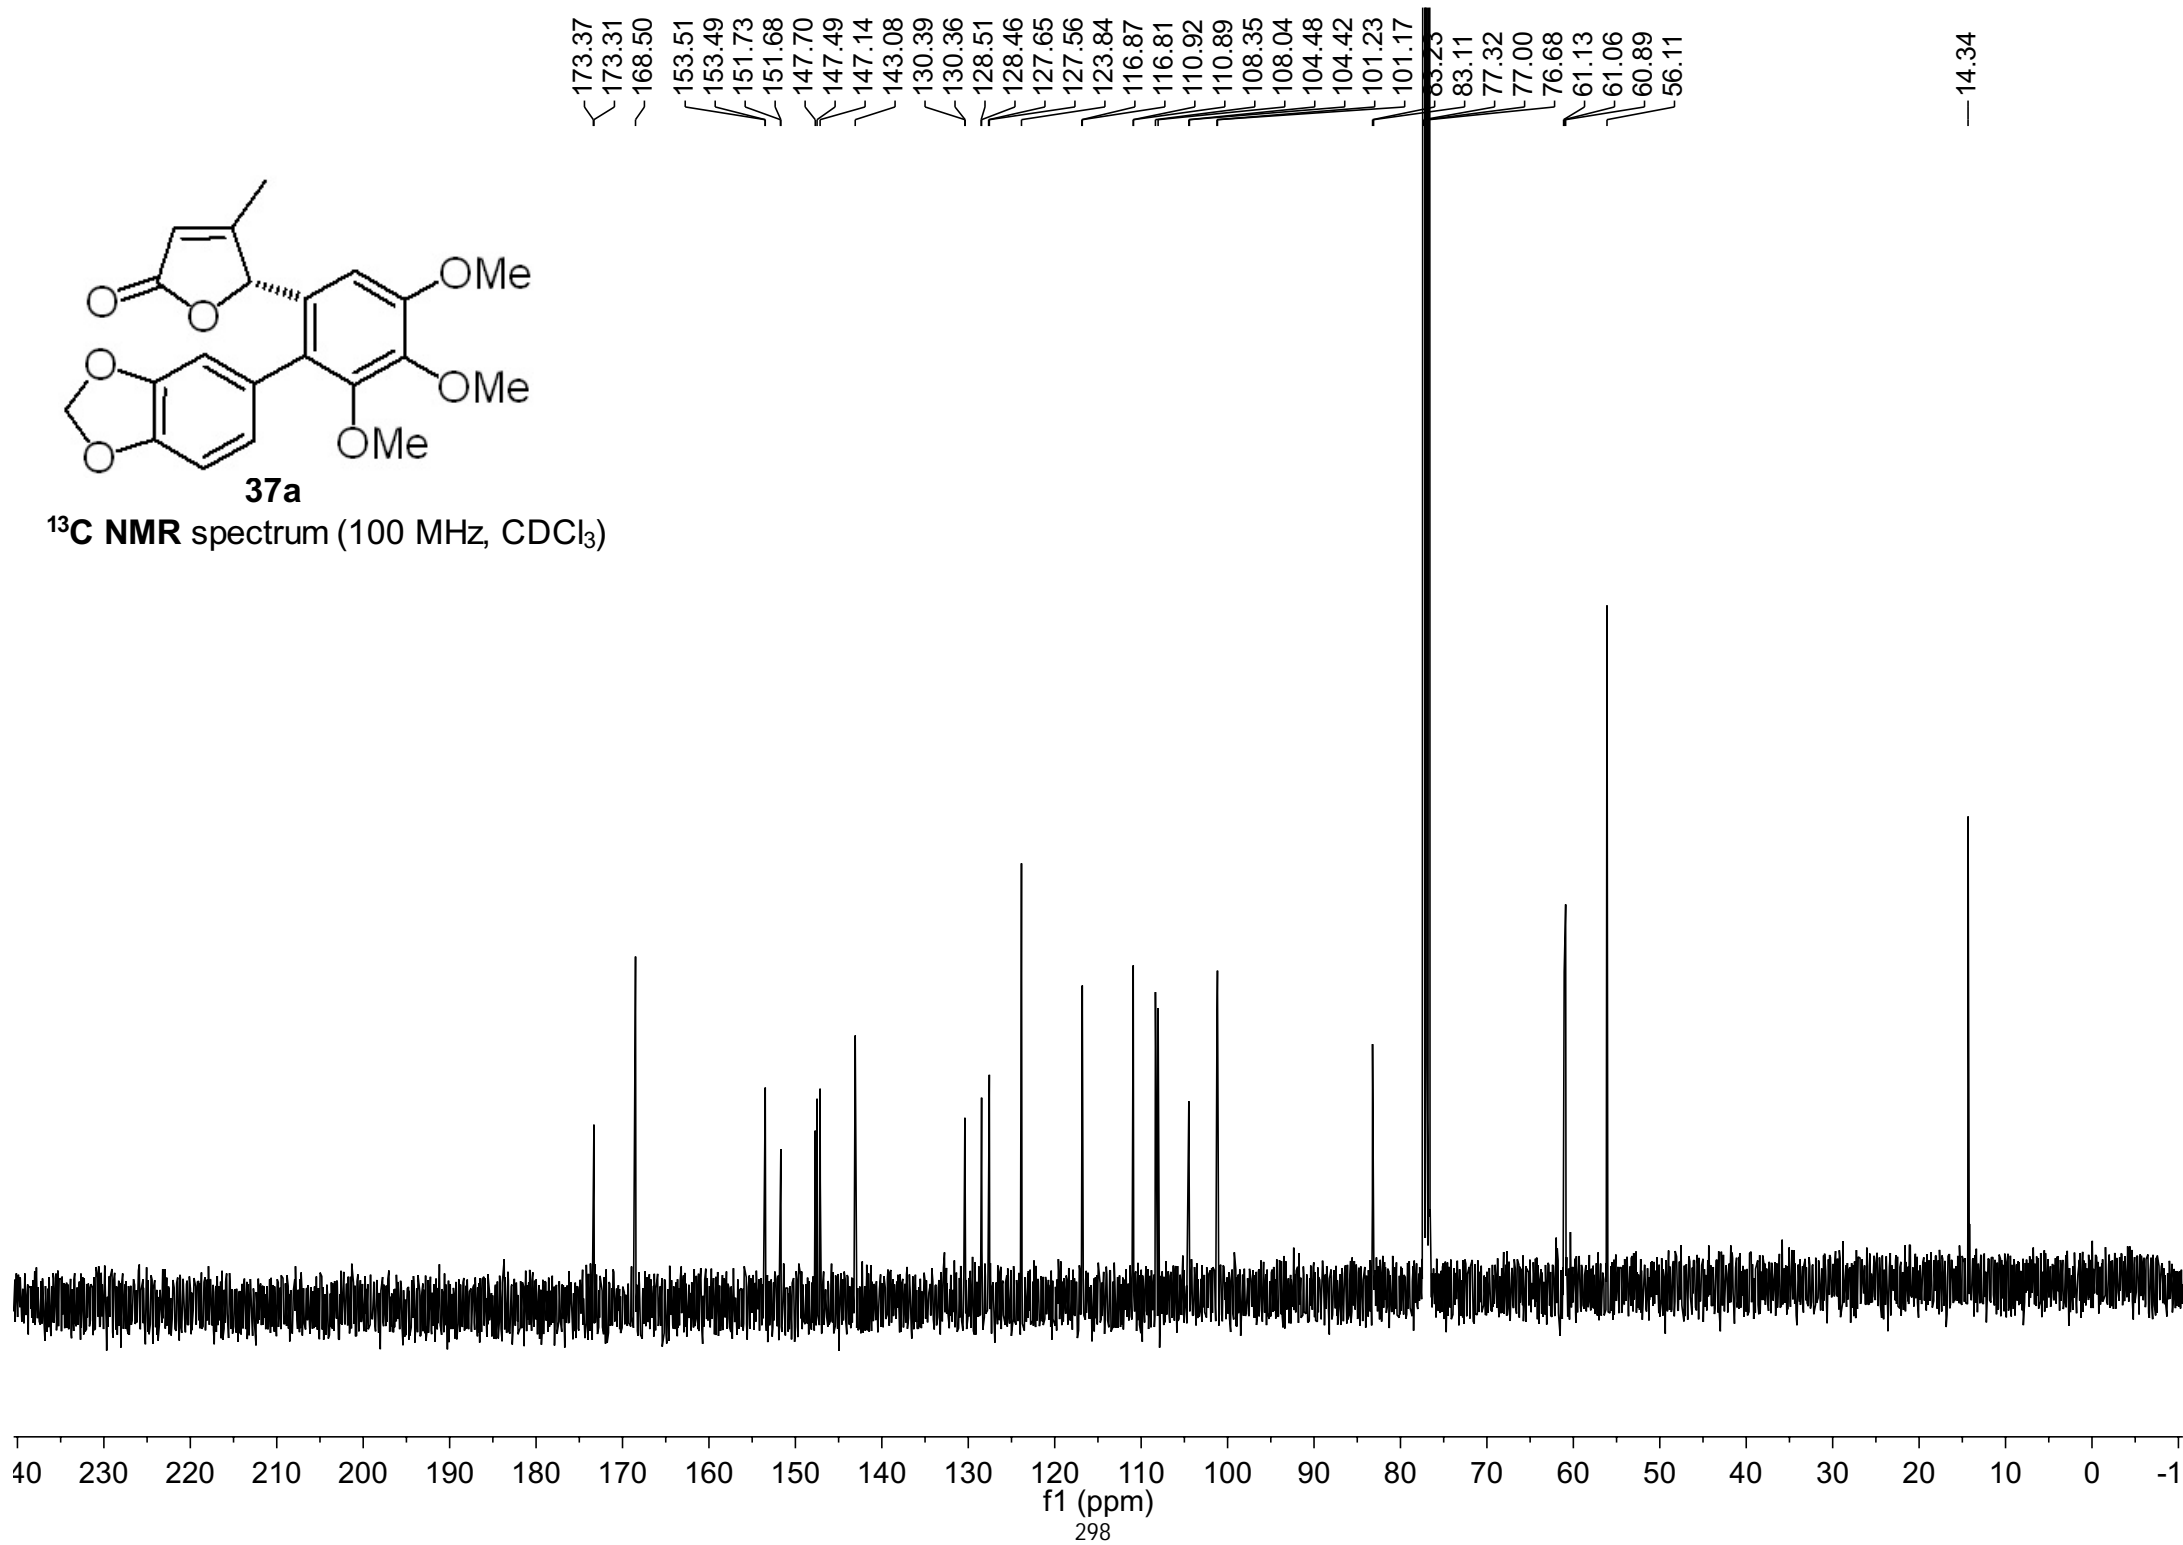

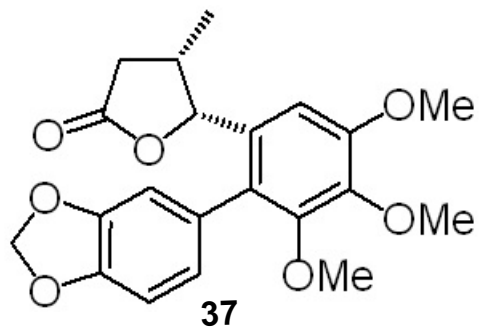

<sup>1</sup>H NMR spectrum (600 MHz, CDCl<sub>3</sub>)

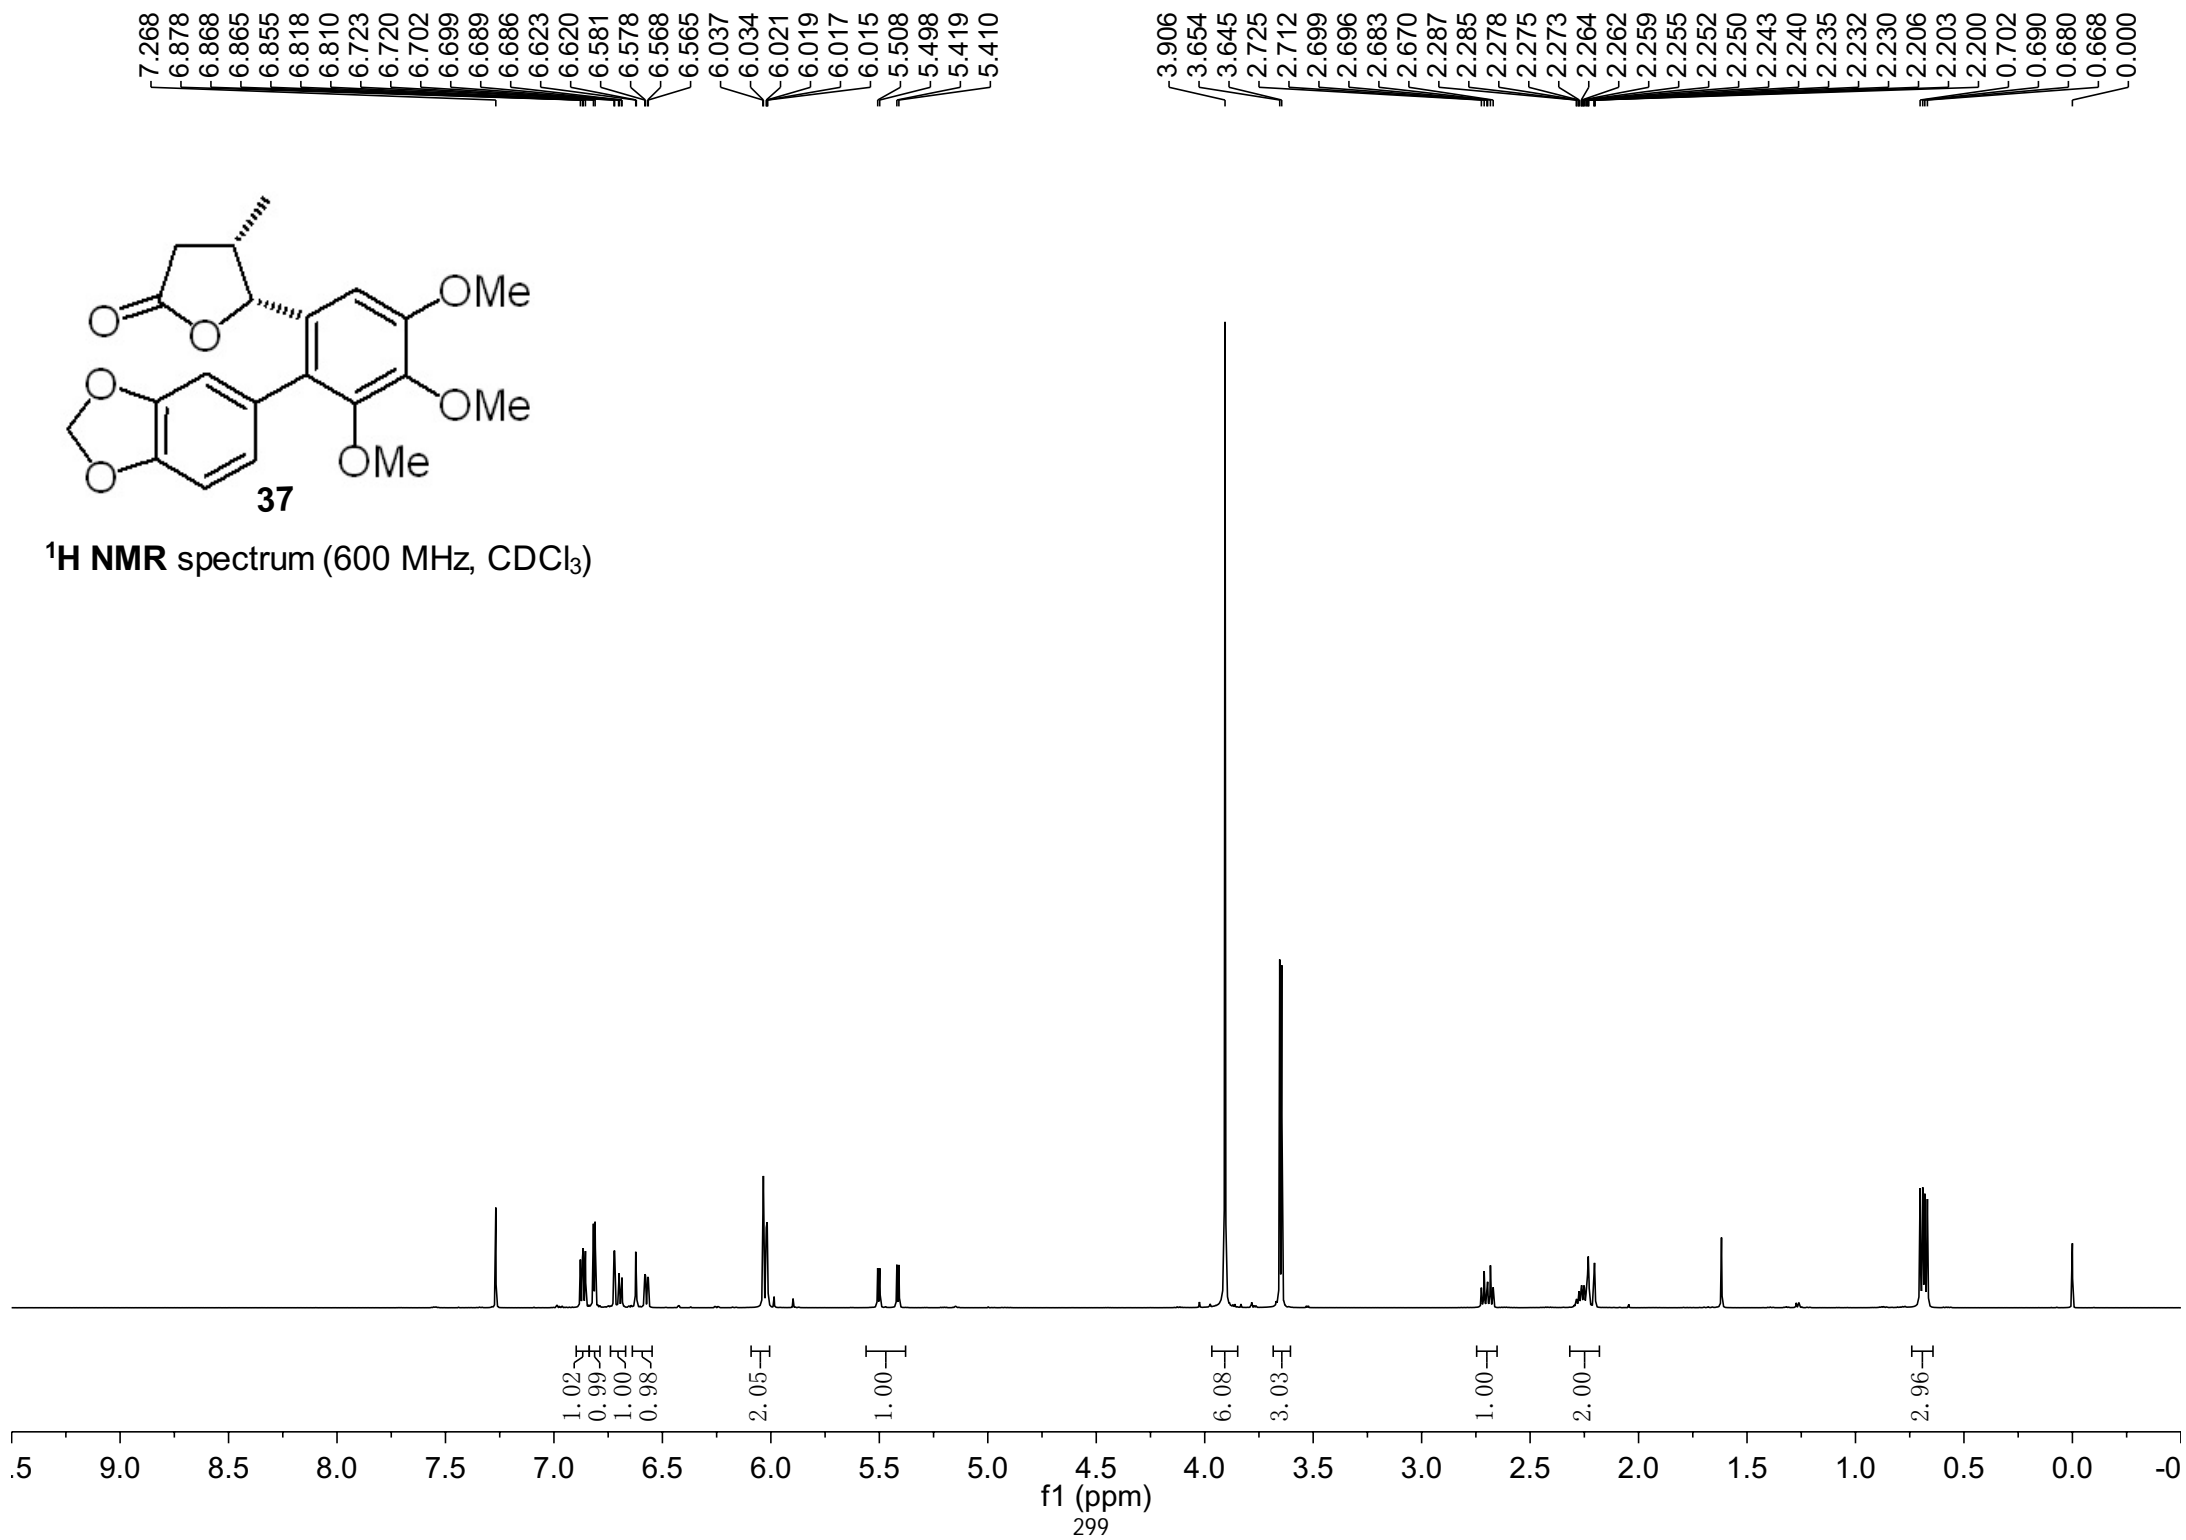





<sup>13</sup>C NMR spectrum (150 MHz, CDCl<sub>3</sub>)

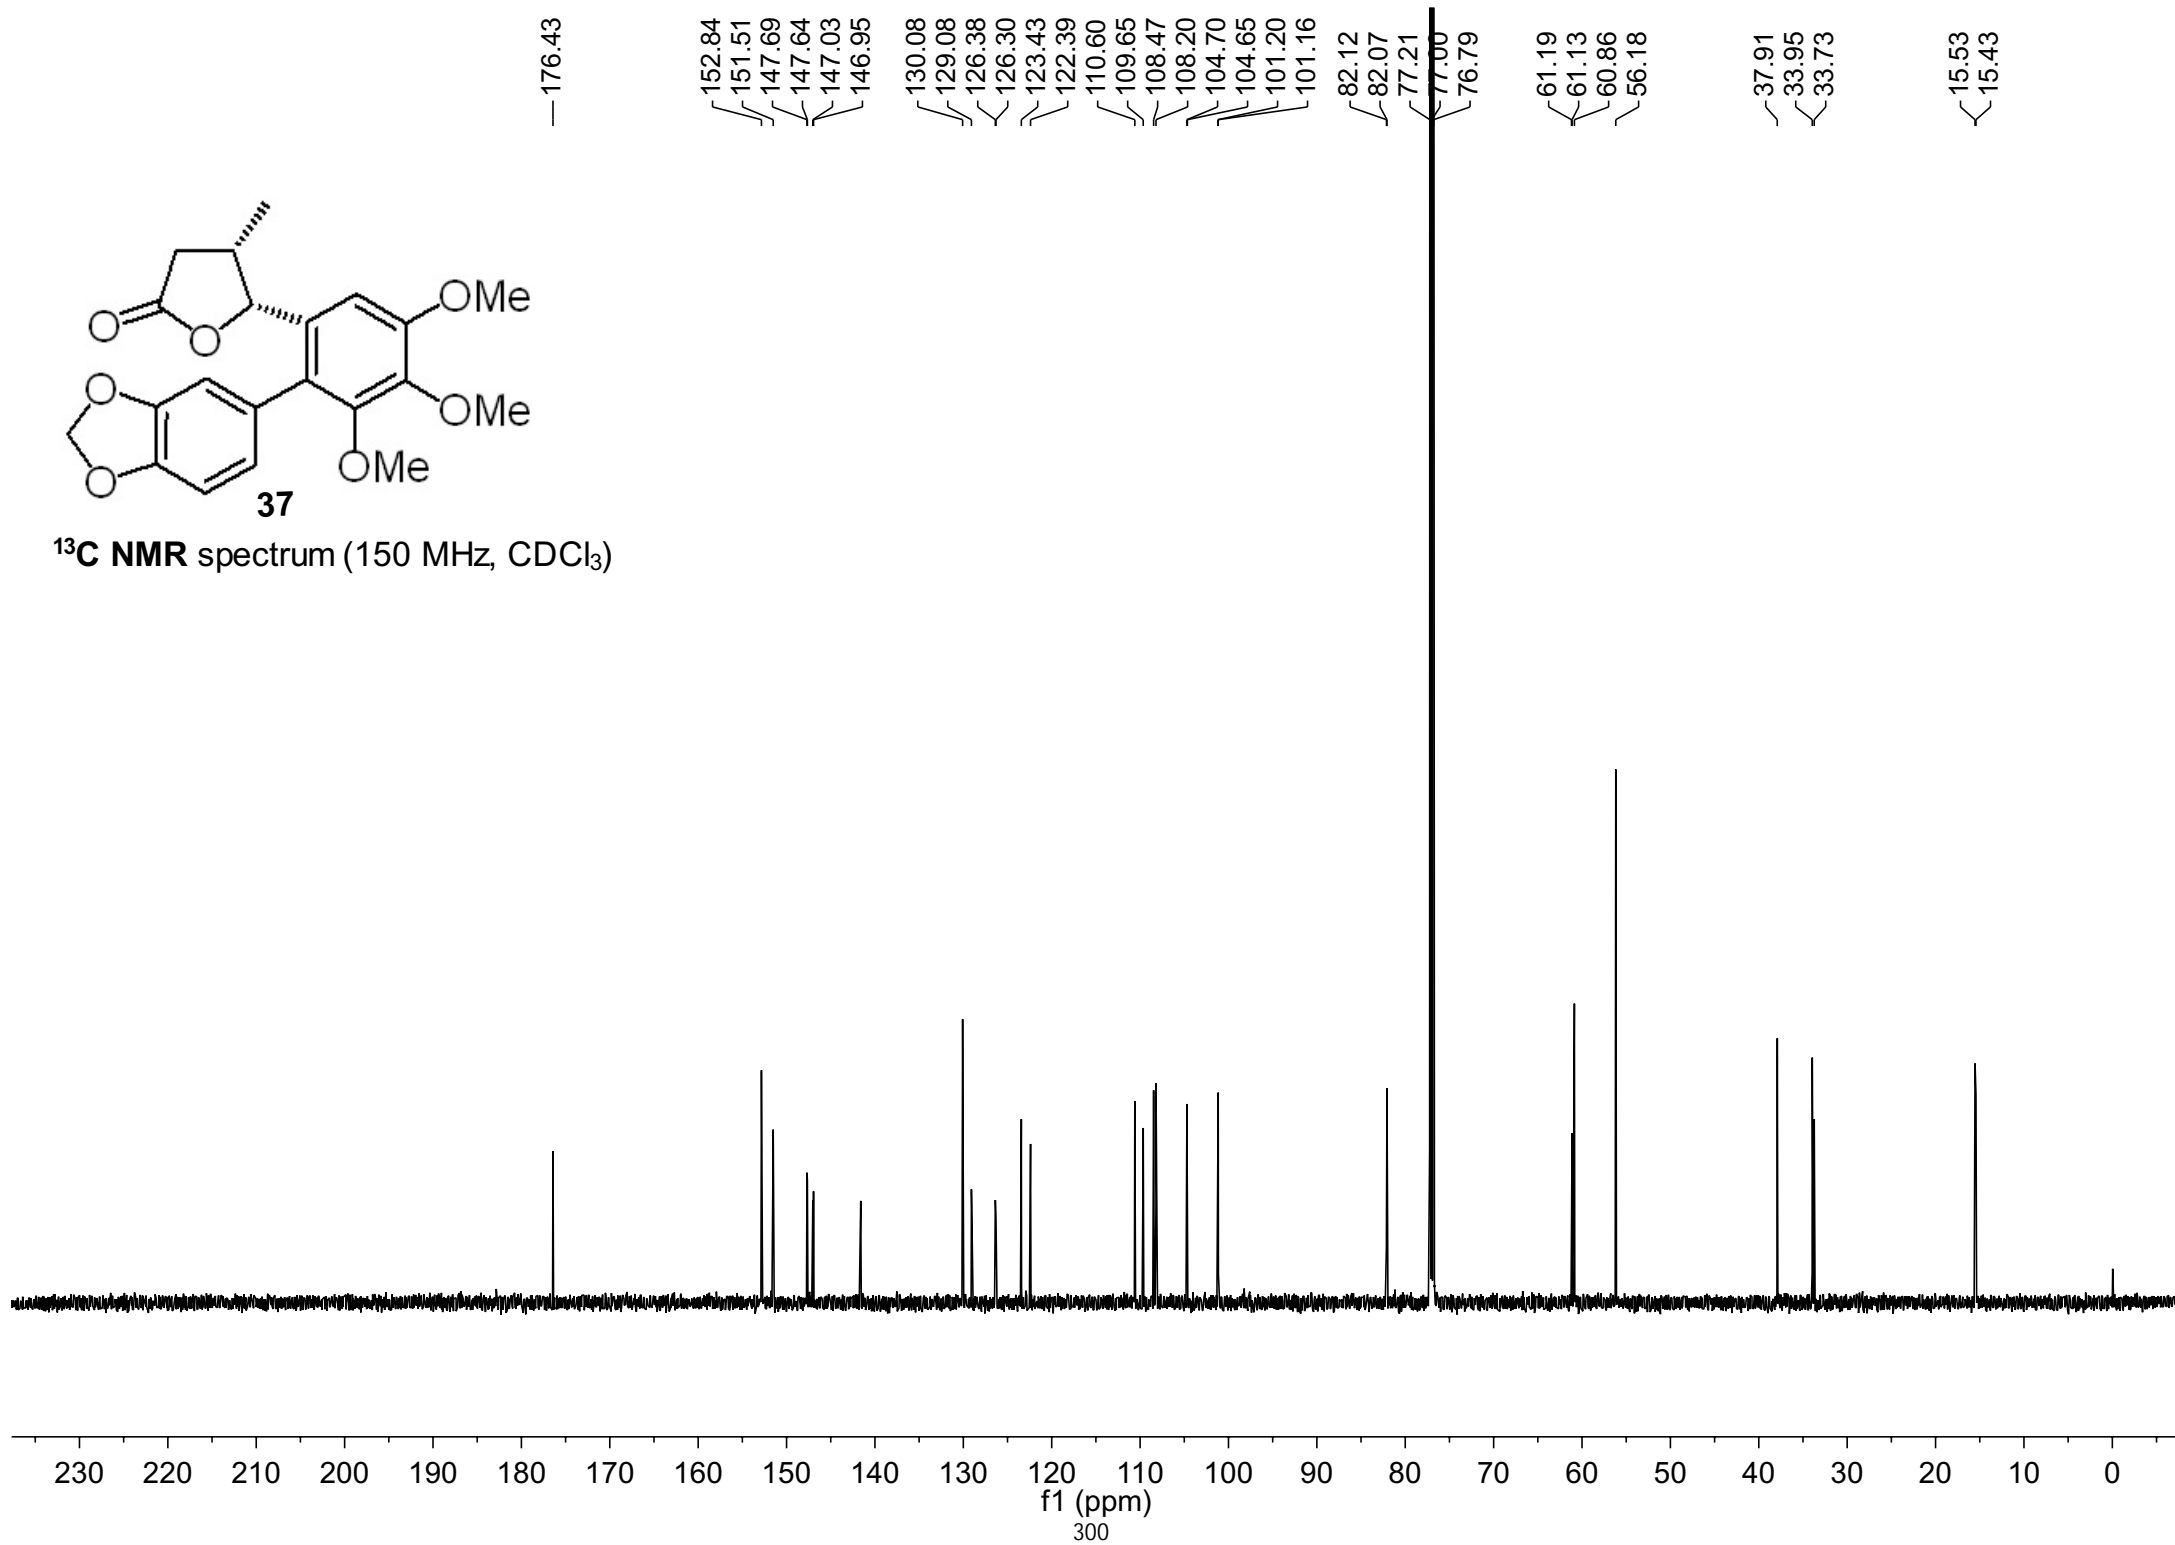

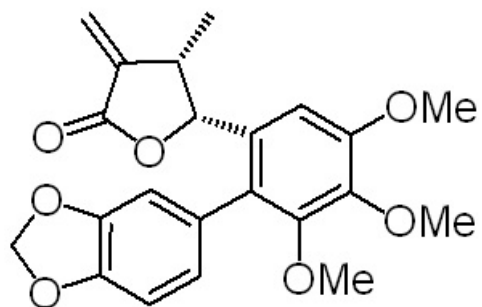

**eupomatilone-5**

<sup>1</sup>H NMR spectrum (600 MHz, CDCl<sub>3</sub>)

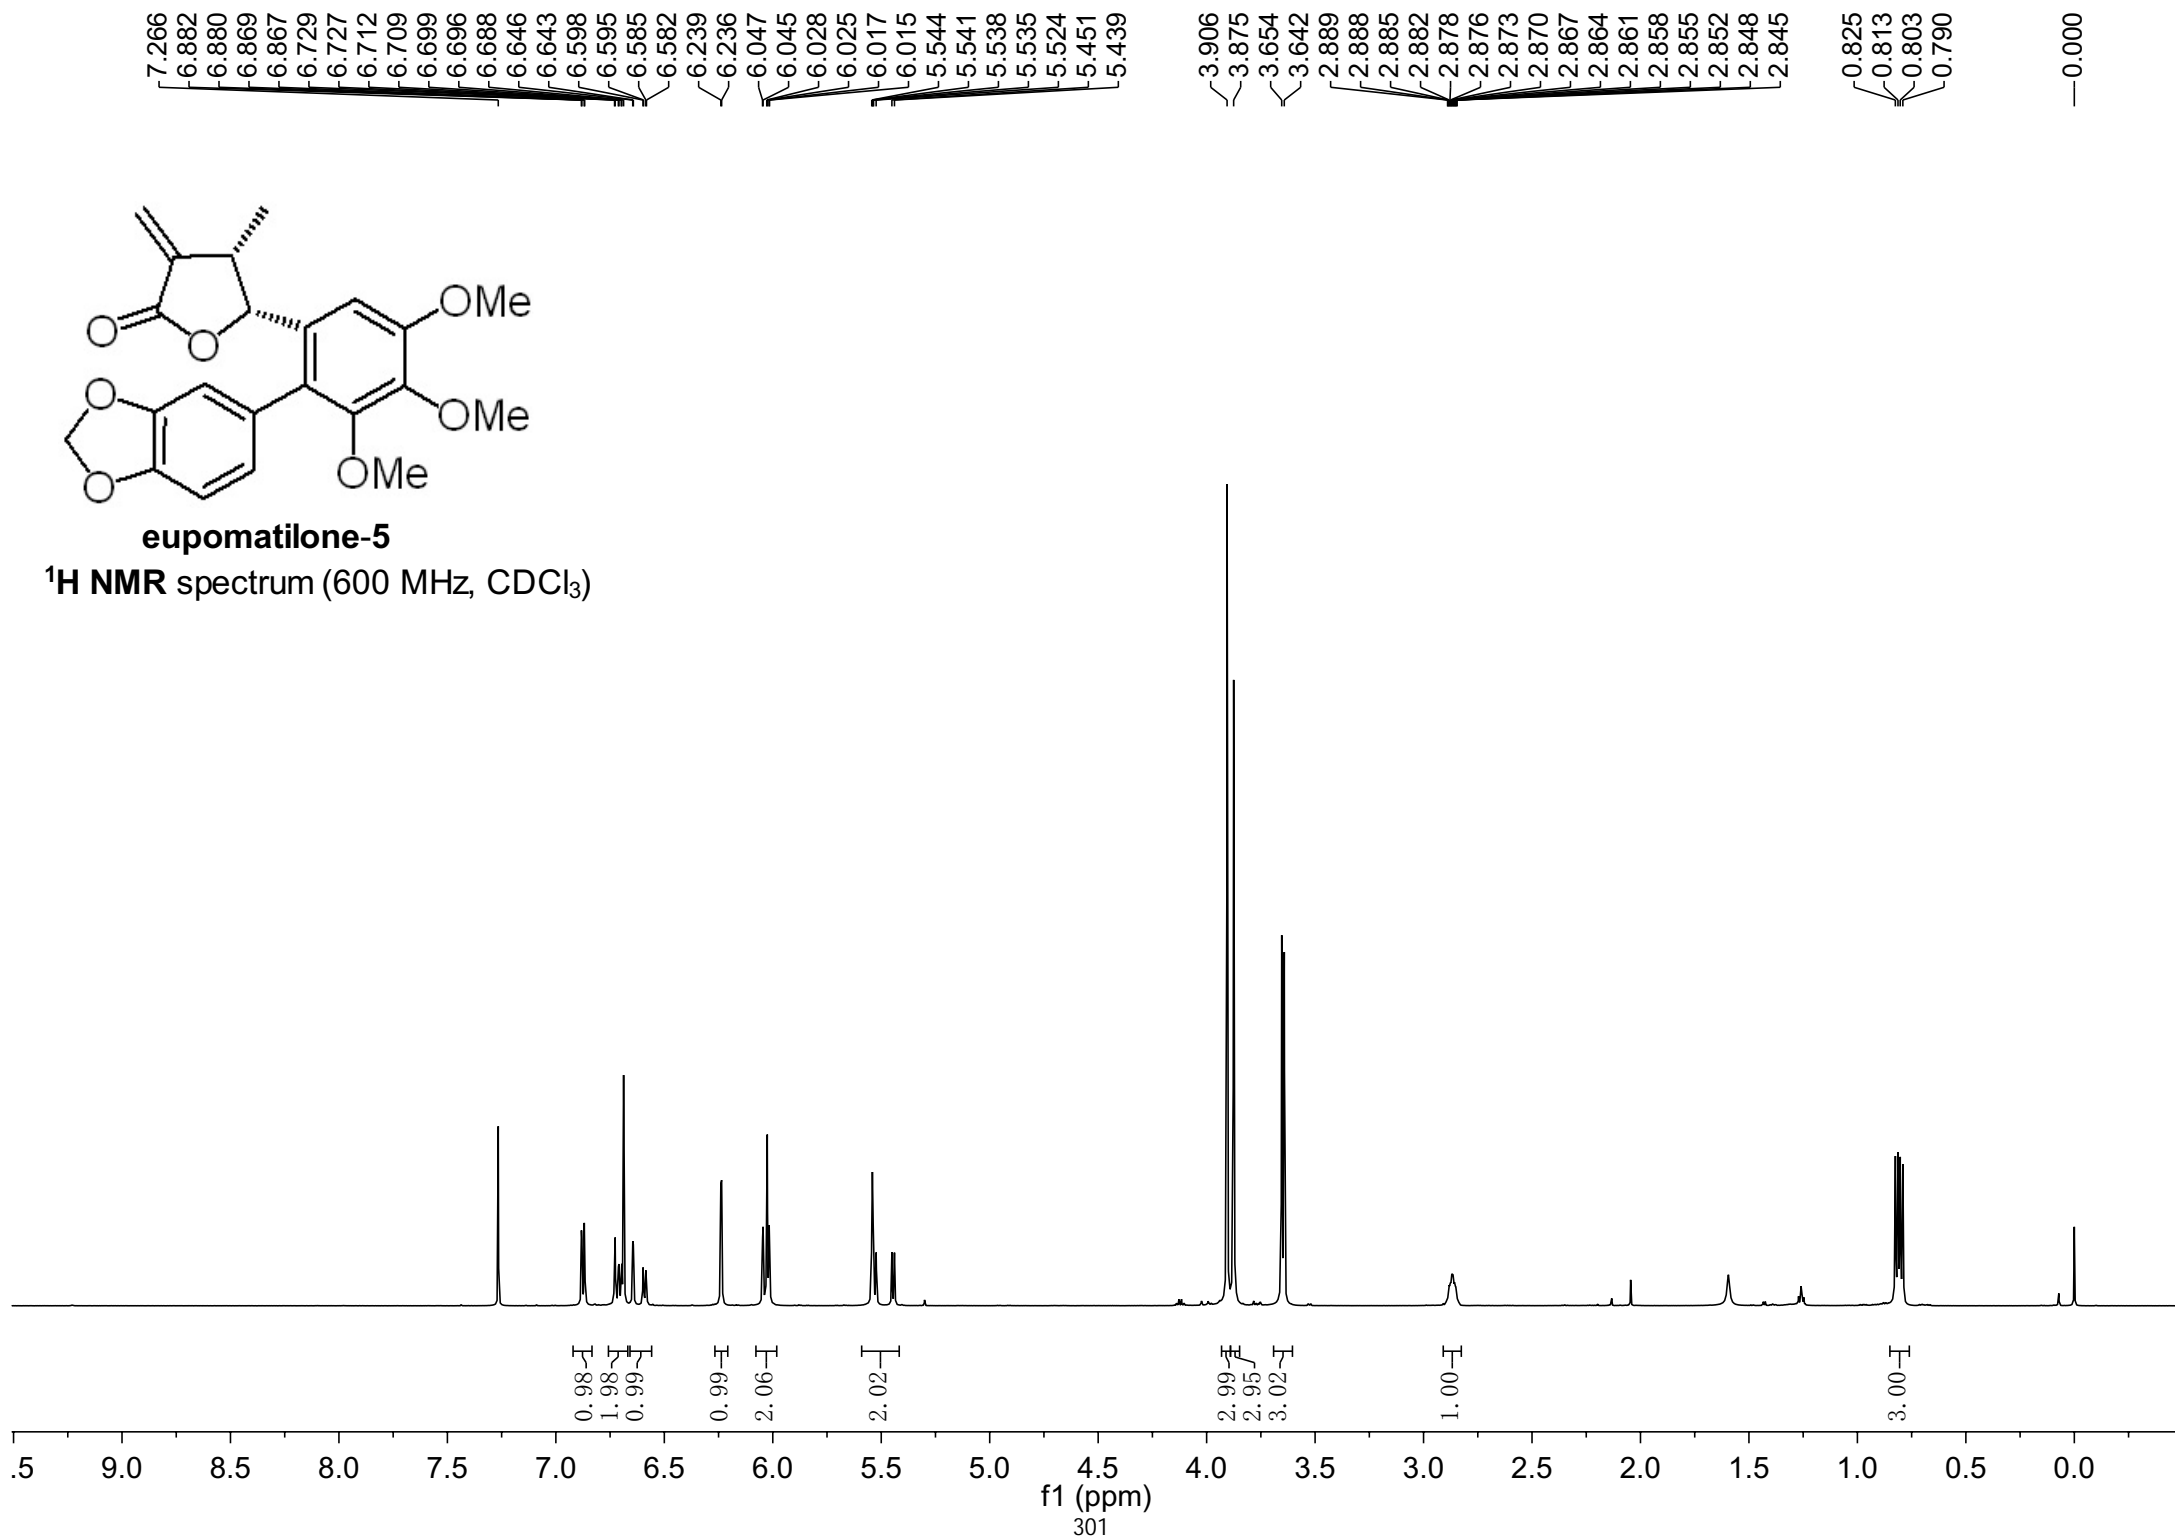

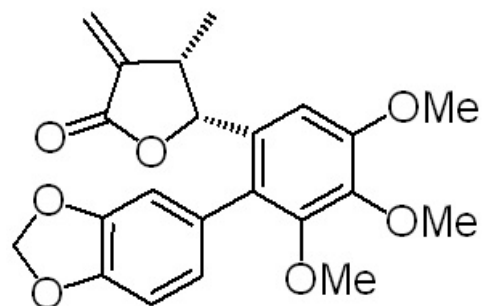

**eupomatilone-5**

<sup>13</sup>C NMR spectrum (150 MHz, CDCl<sub>3</sub>)

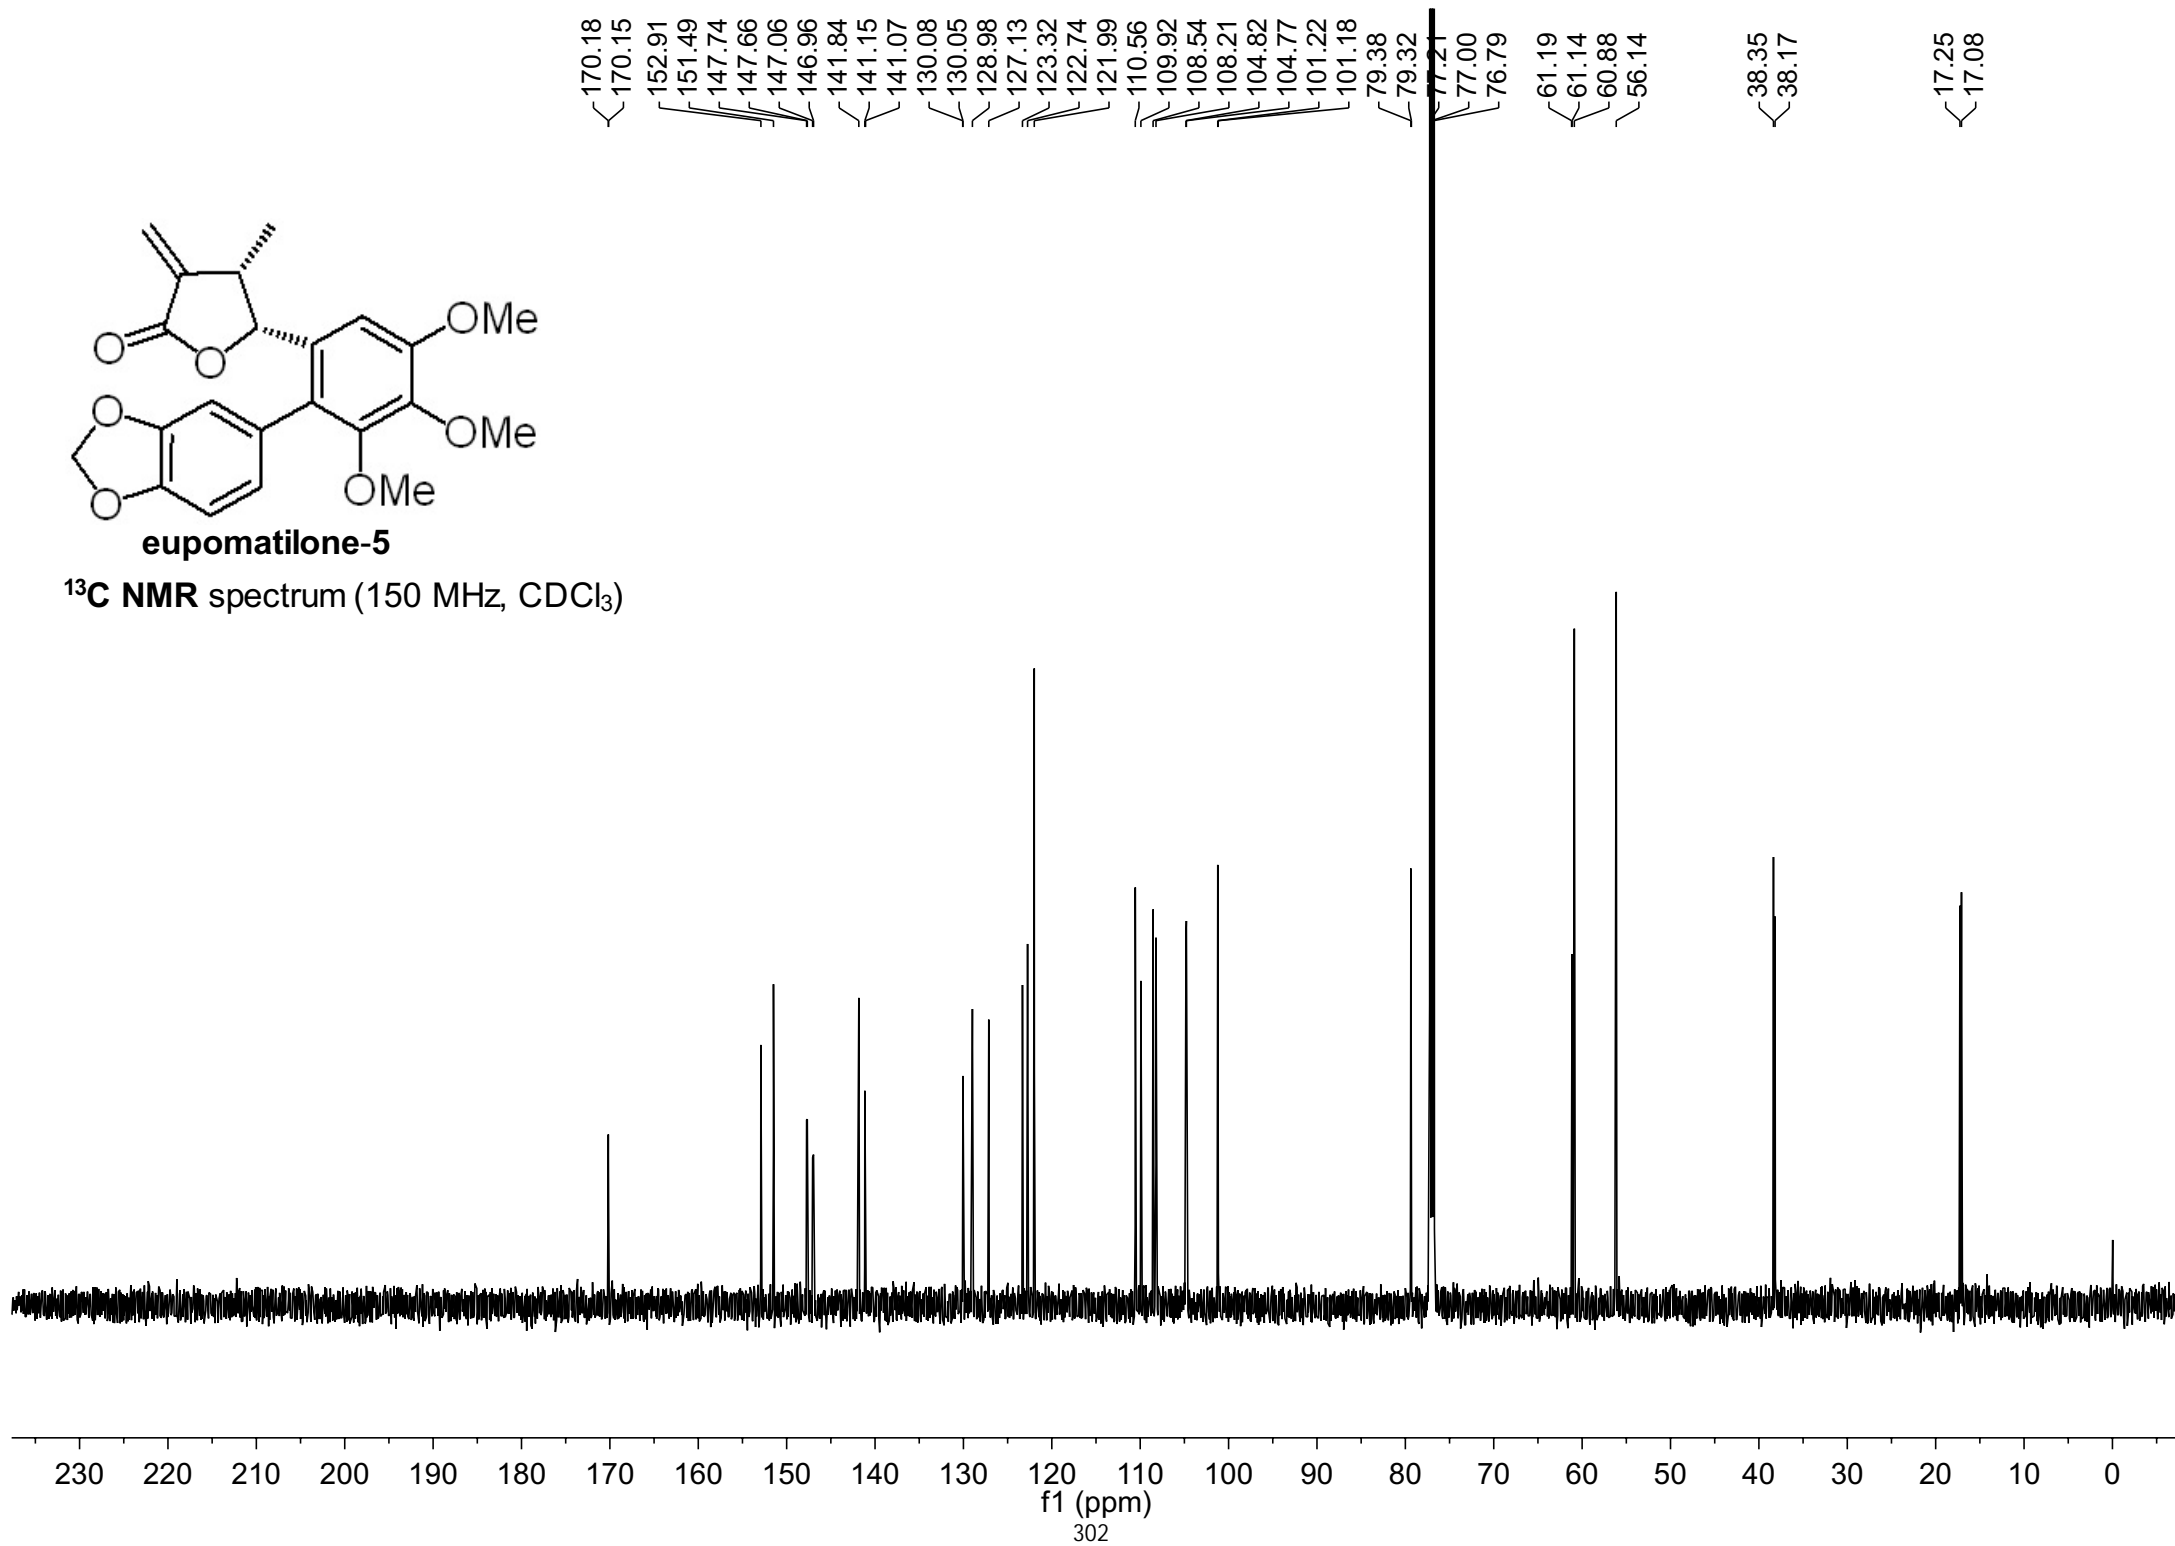

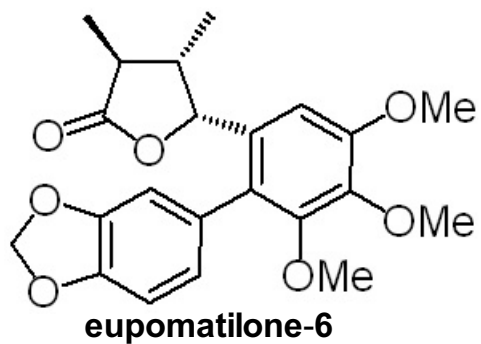

<sup>1</sup>H NMR spectrum (600 MHz, CDCl<sub>3</sub>)

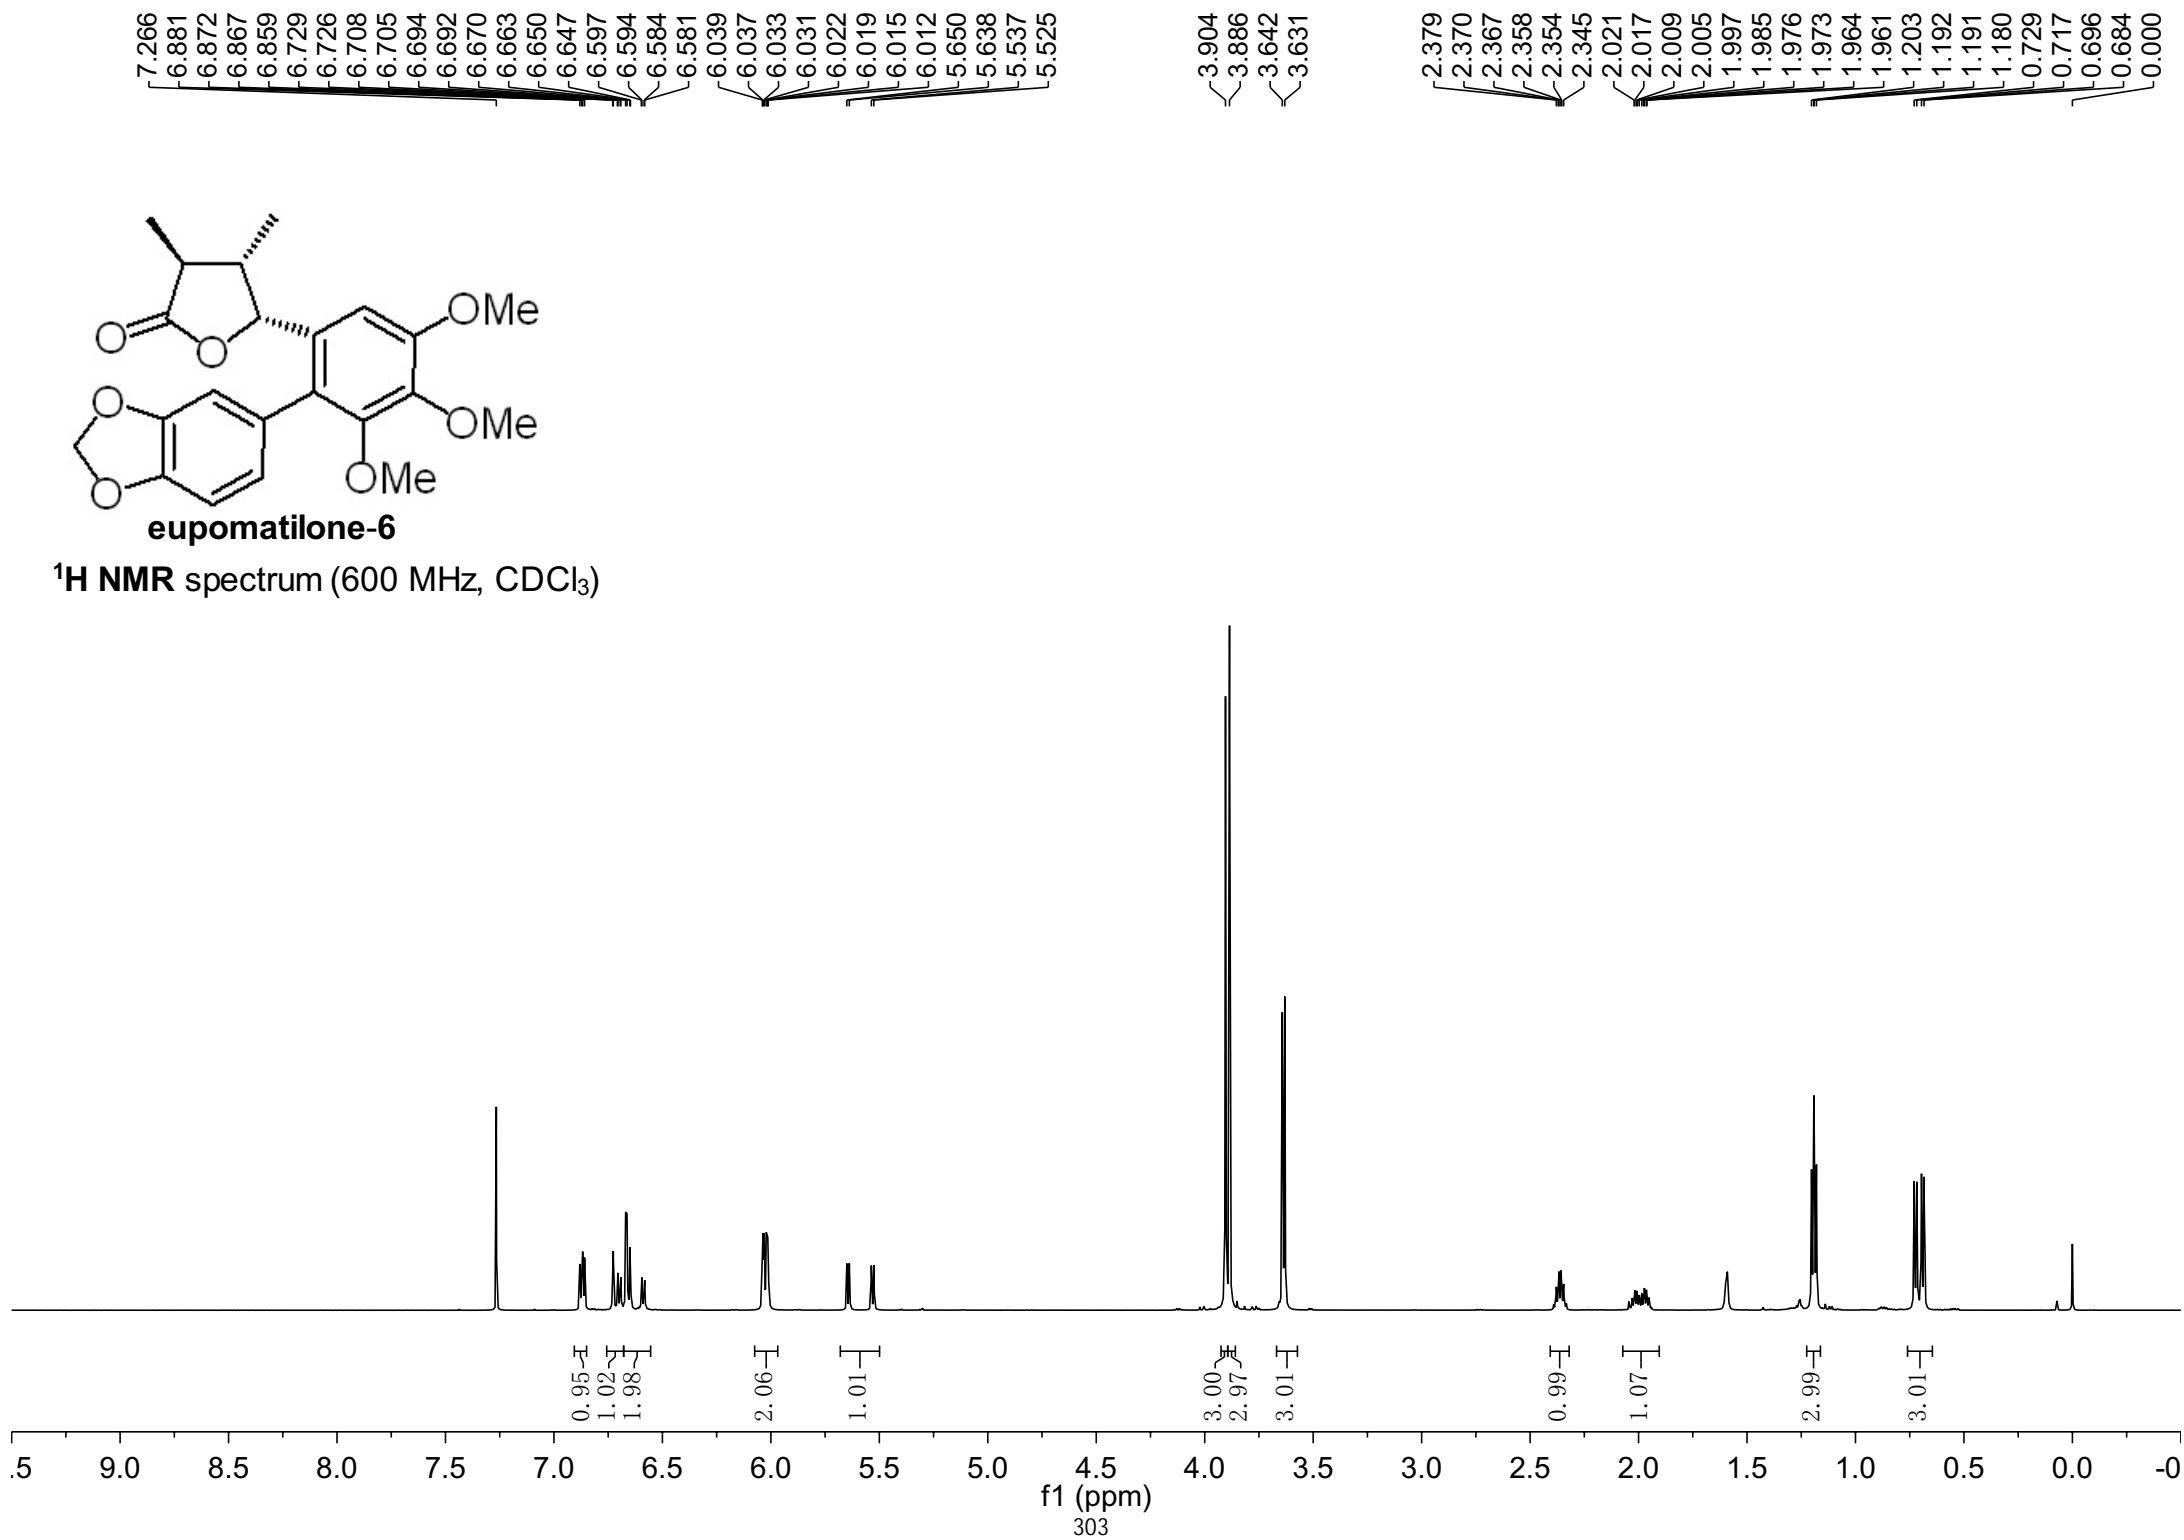

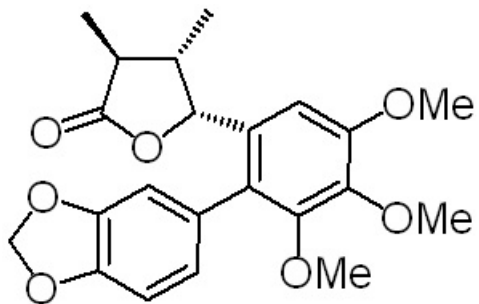

**eupomatilone-6**

<sup>13</sup>C NMR spectrum (150 MHz, CDCl<sub>3</sub>)

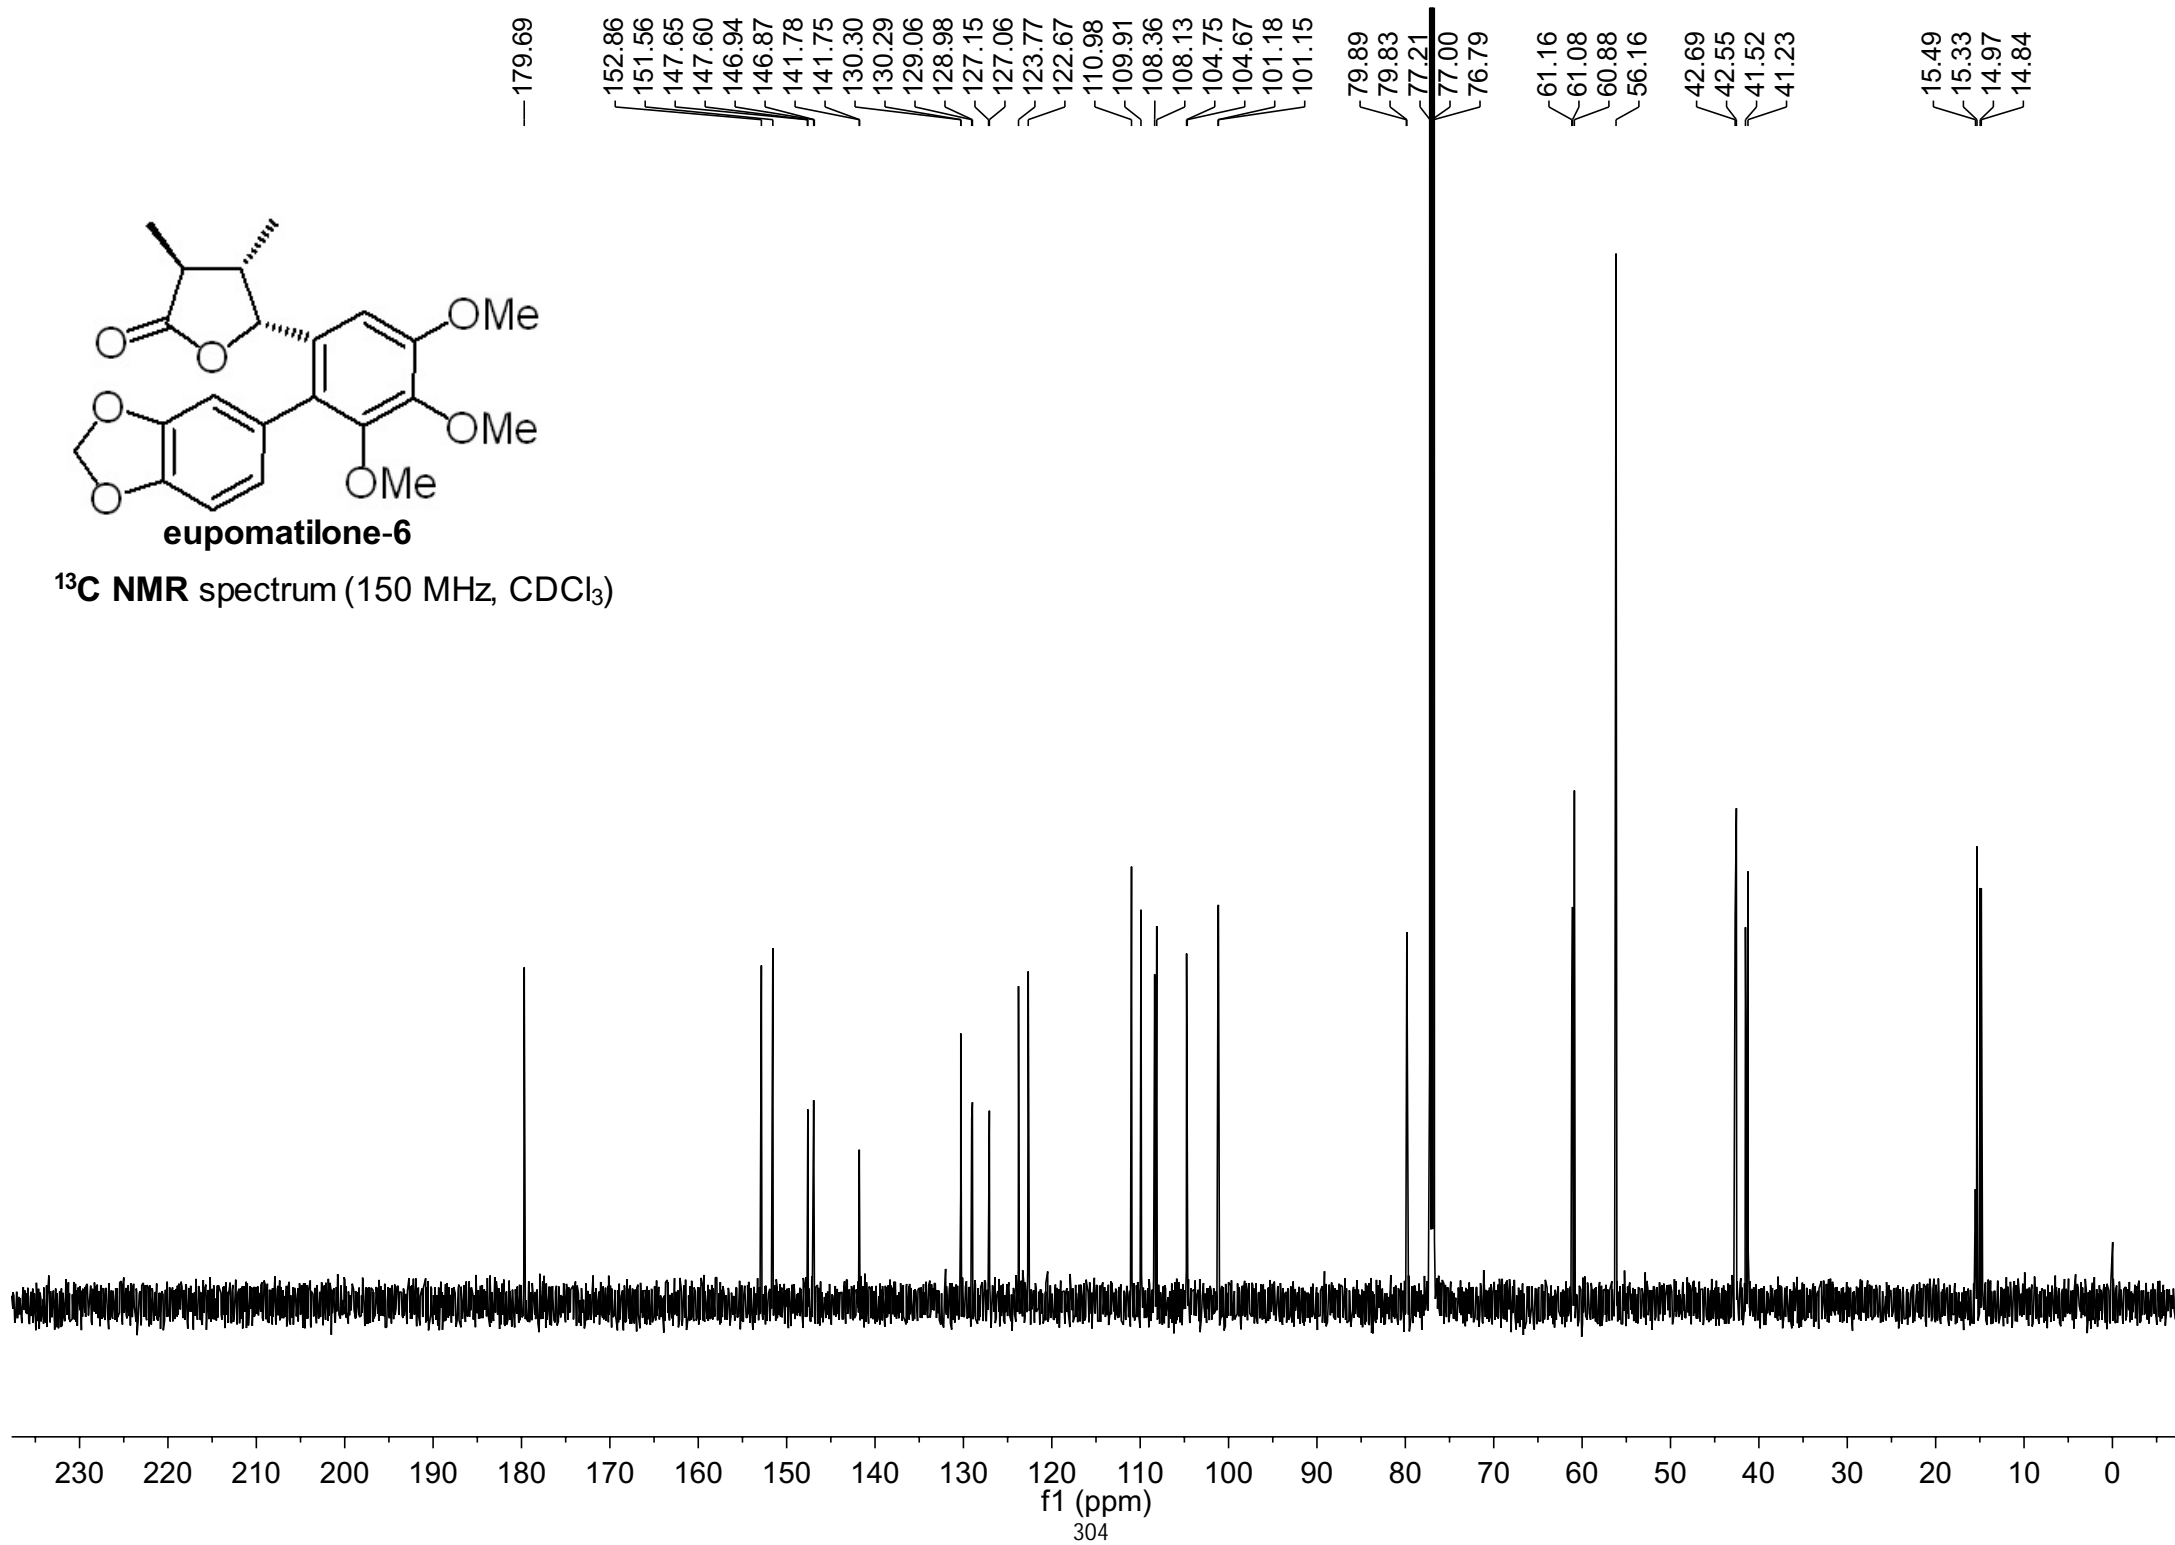

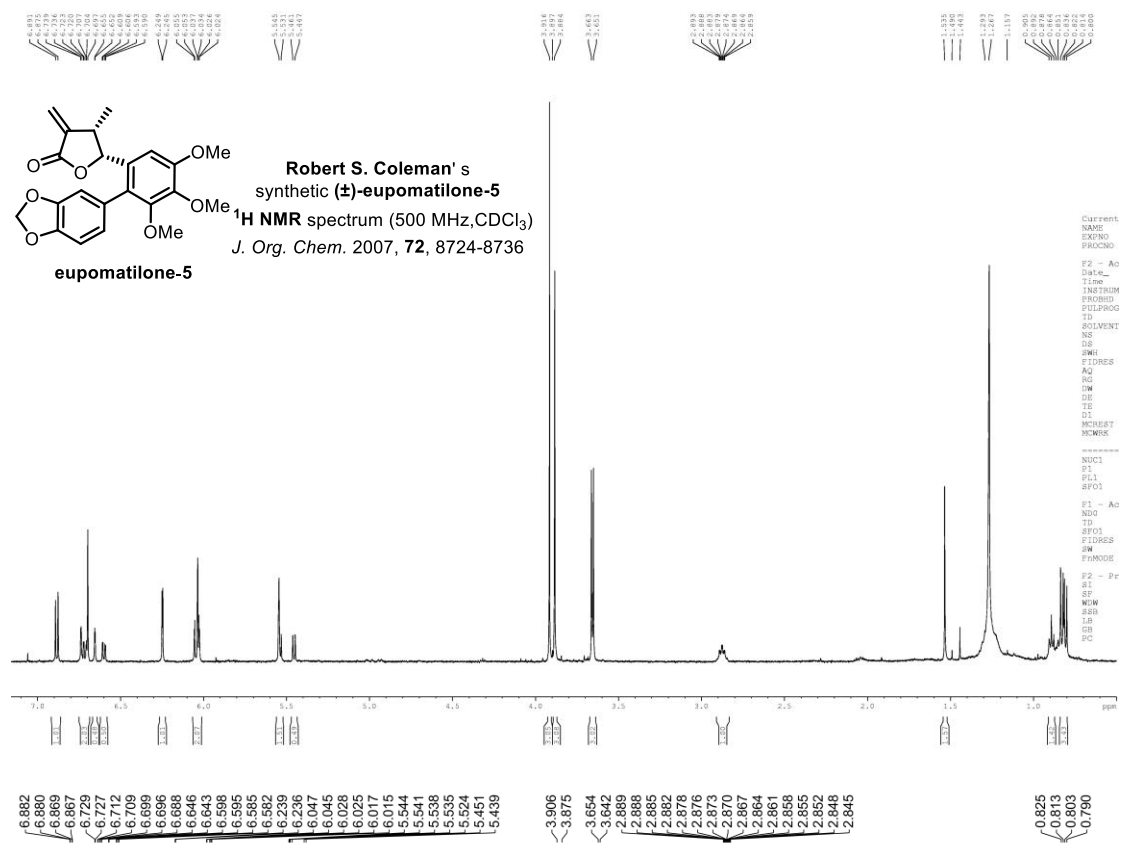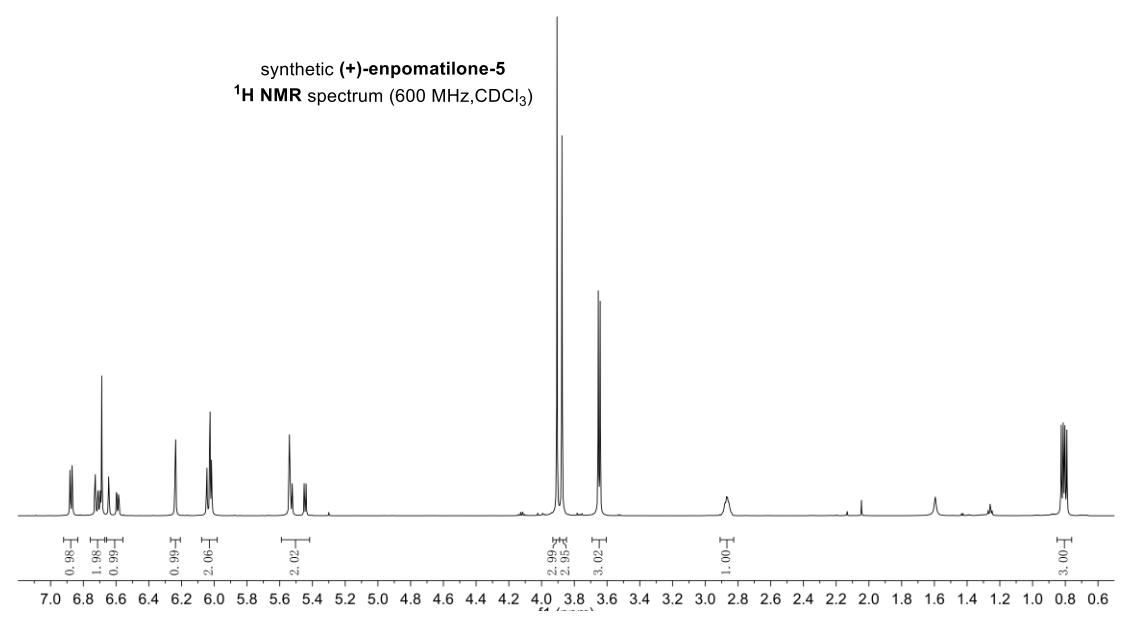

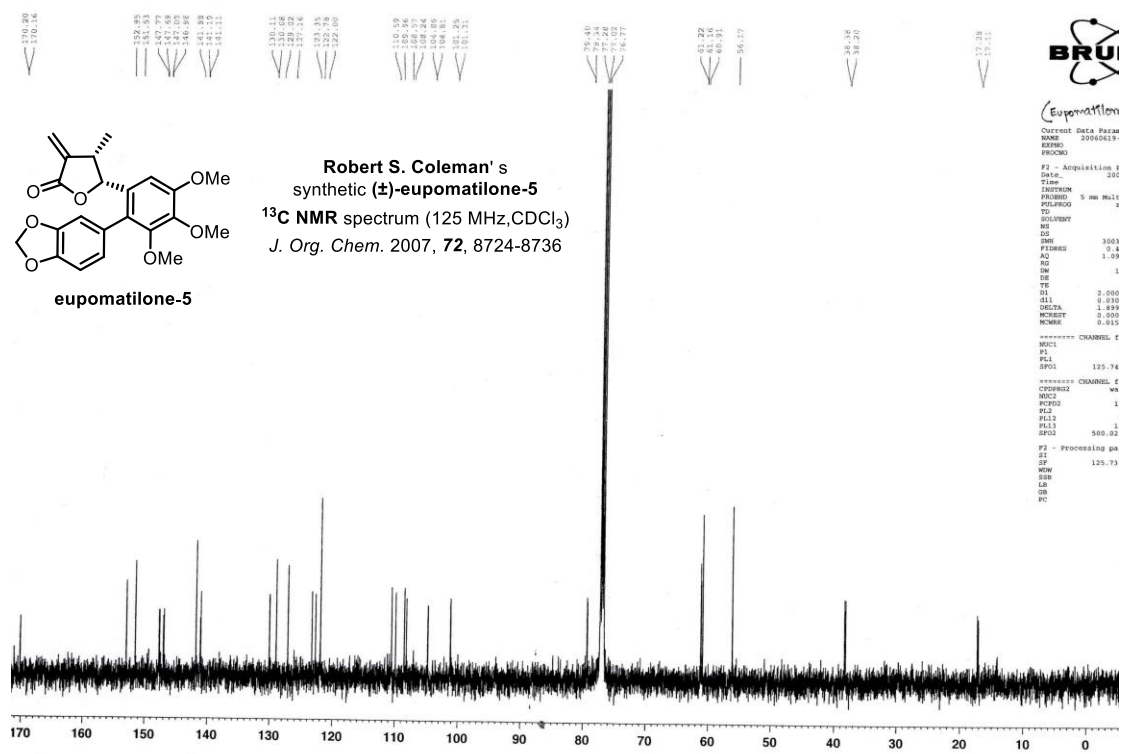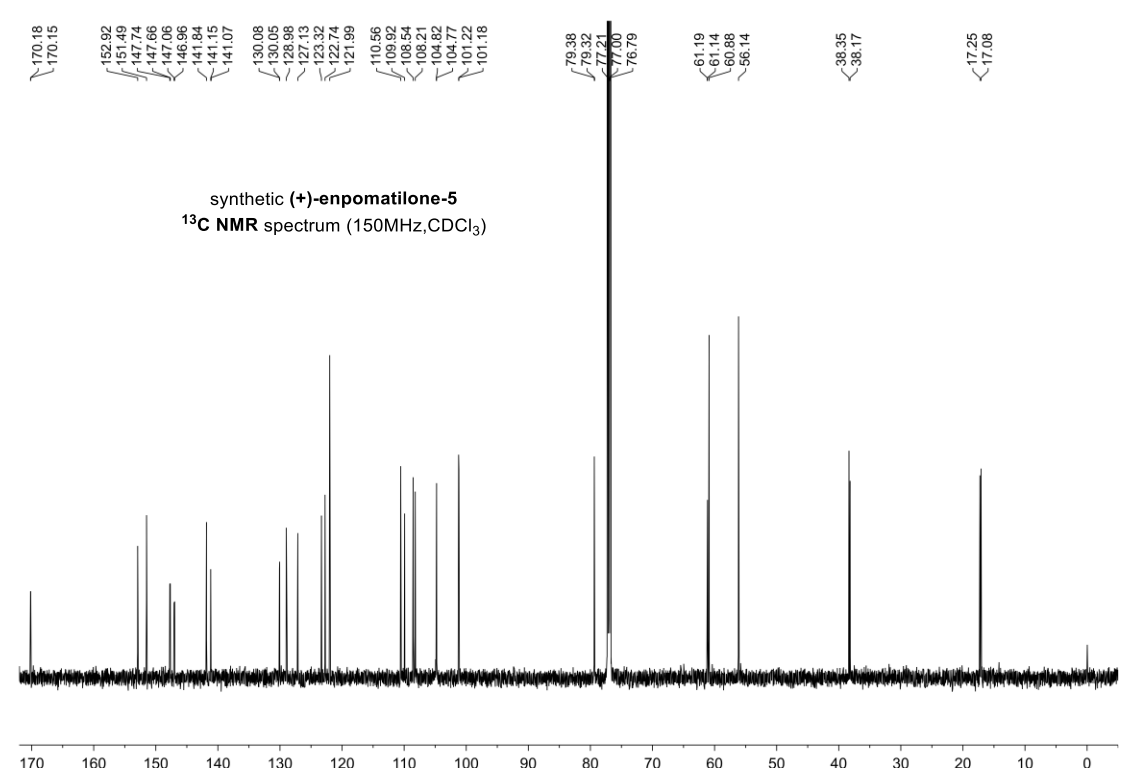

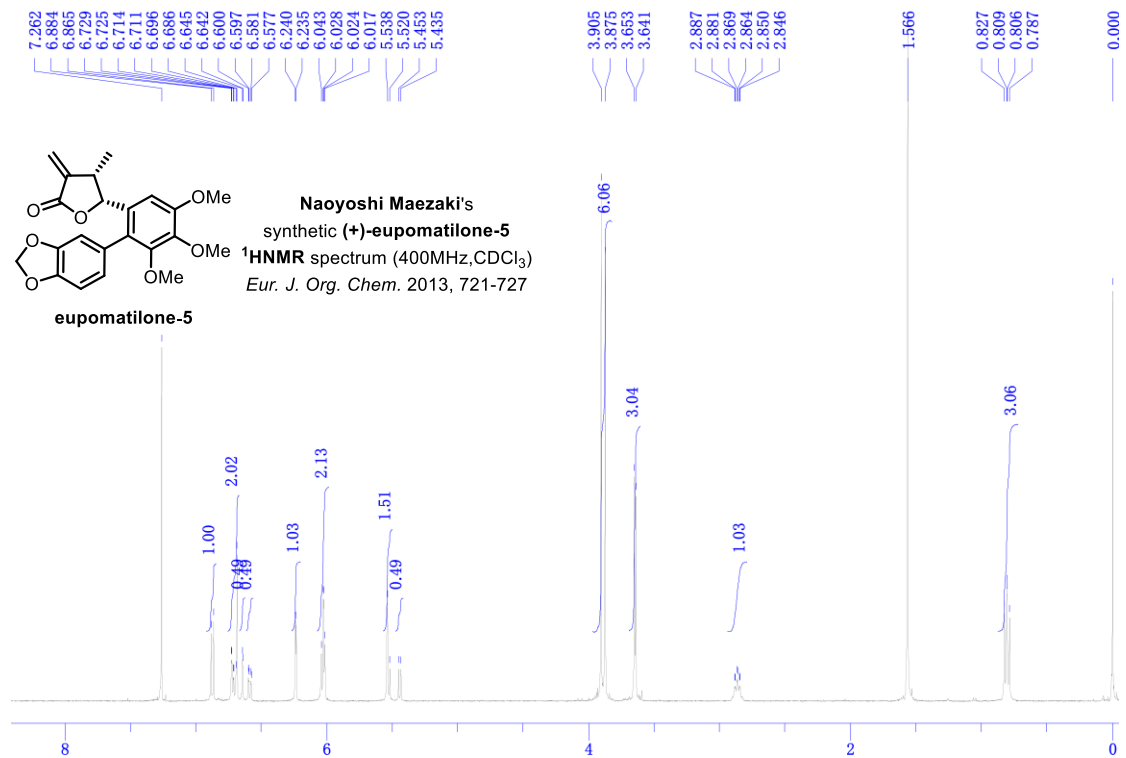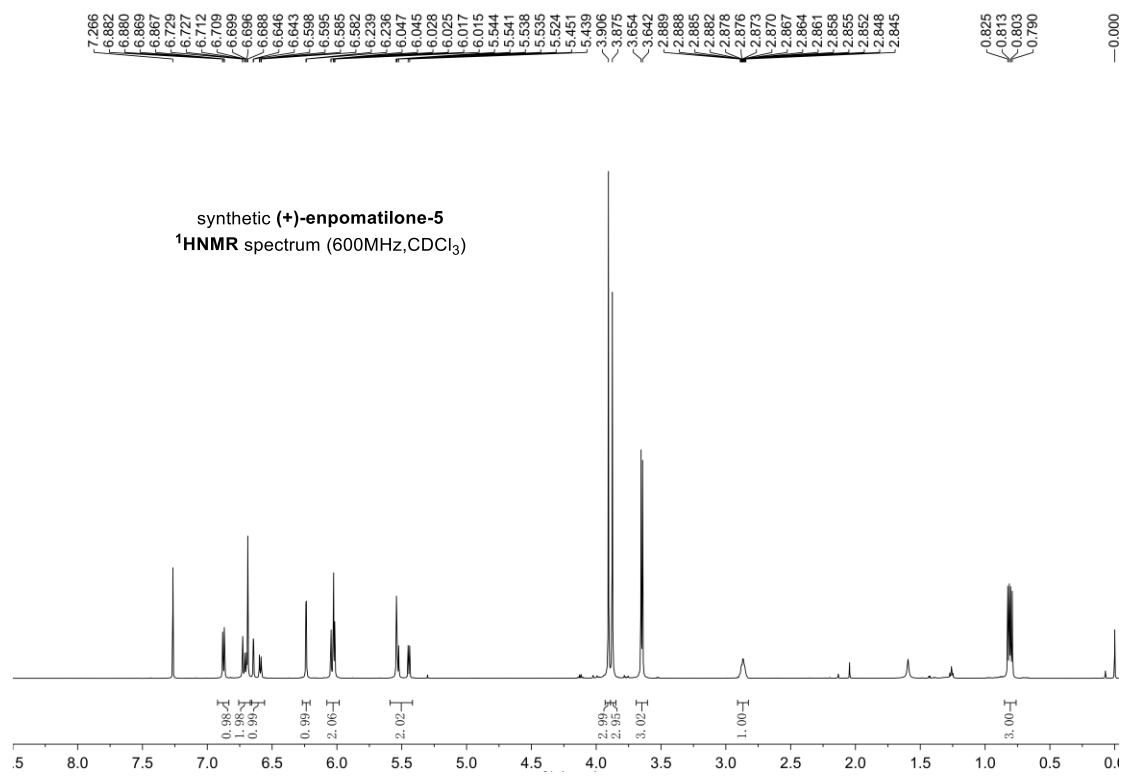



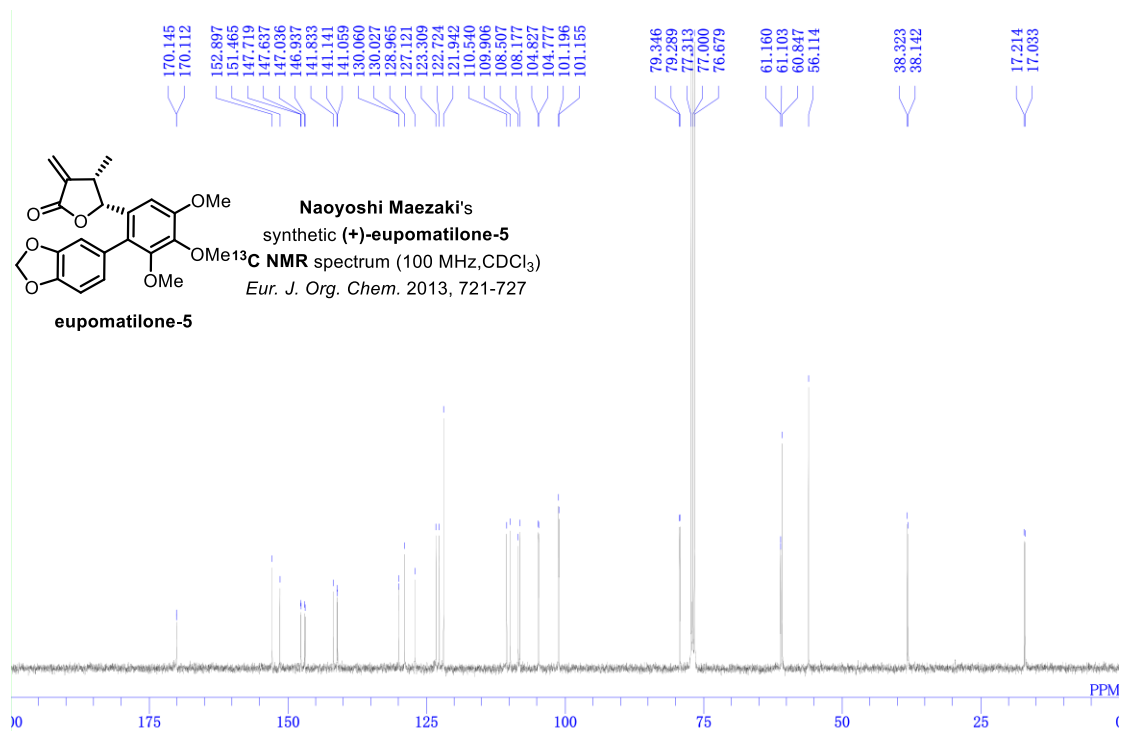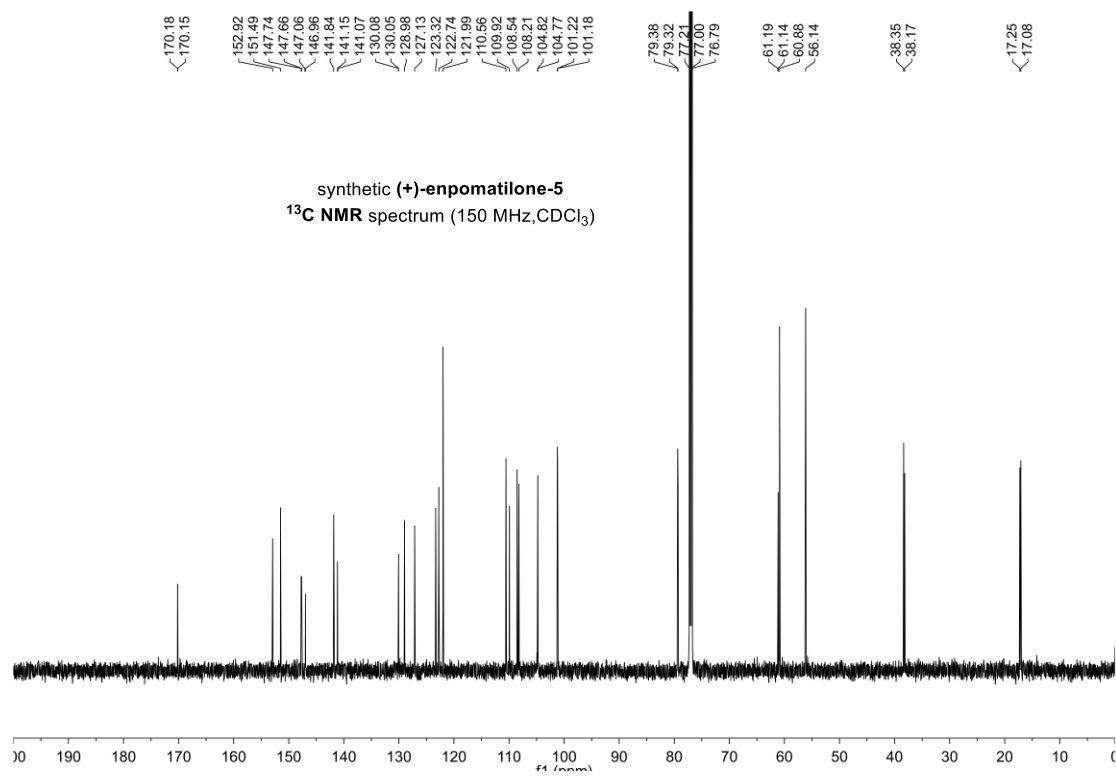

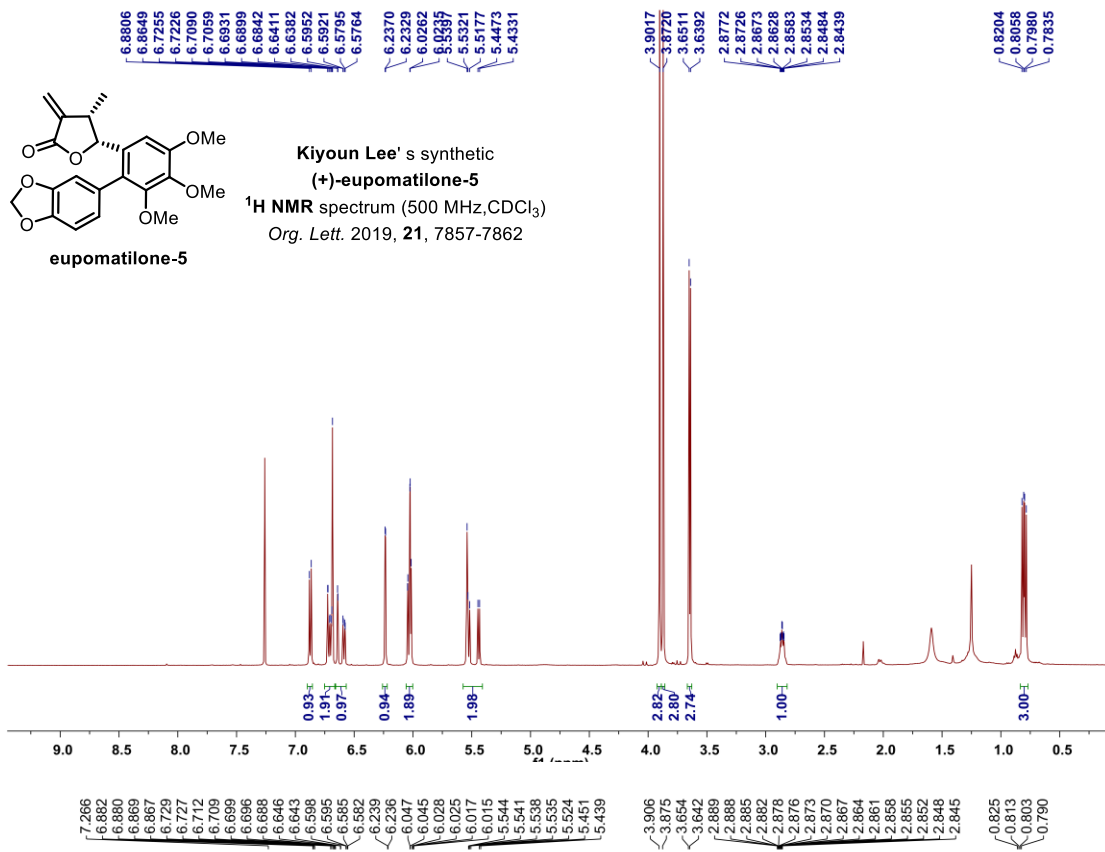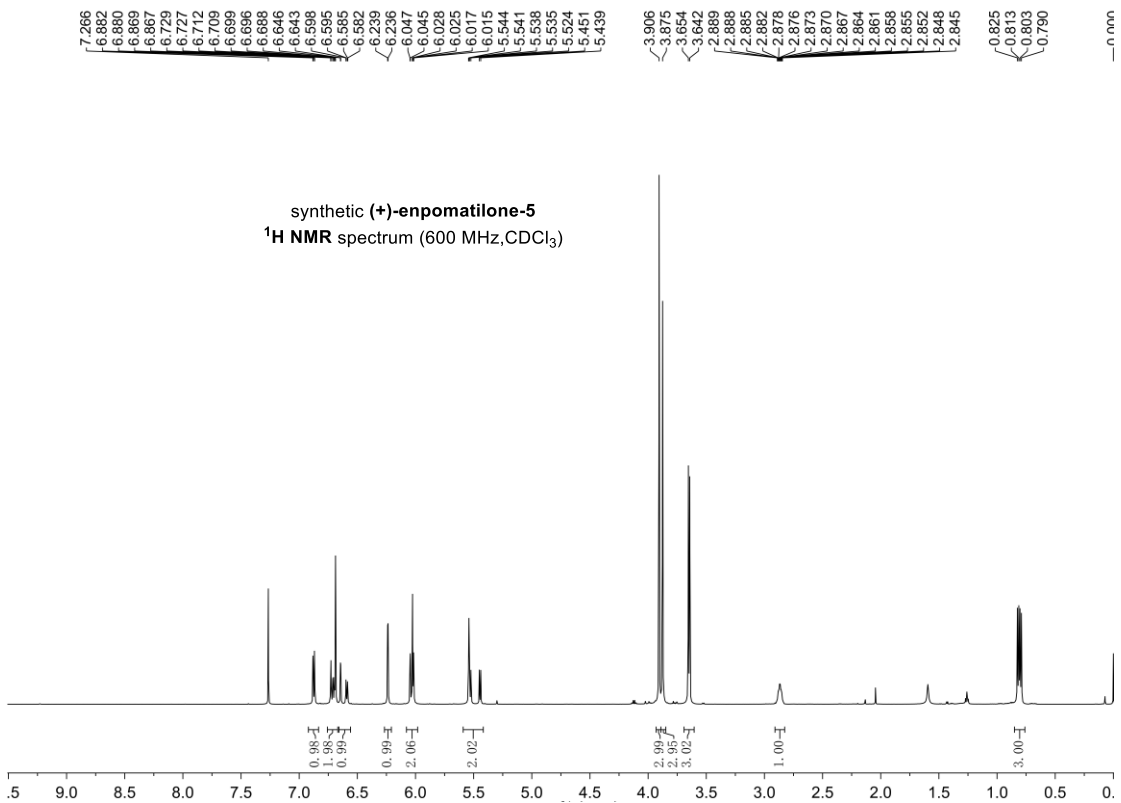

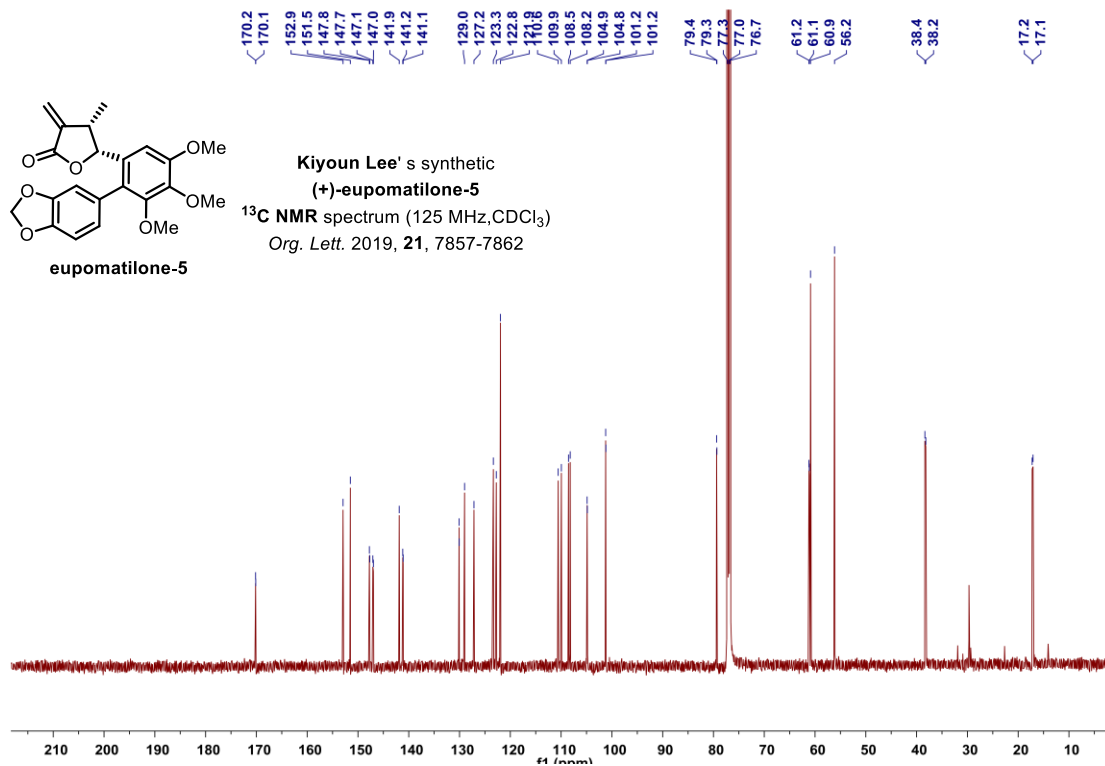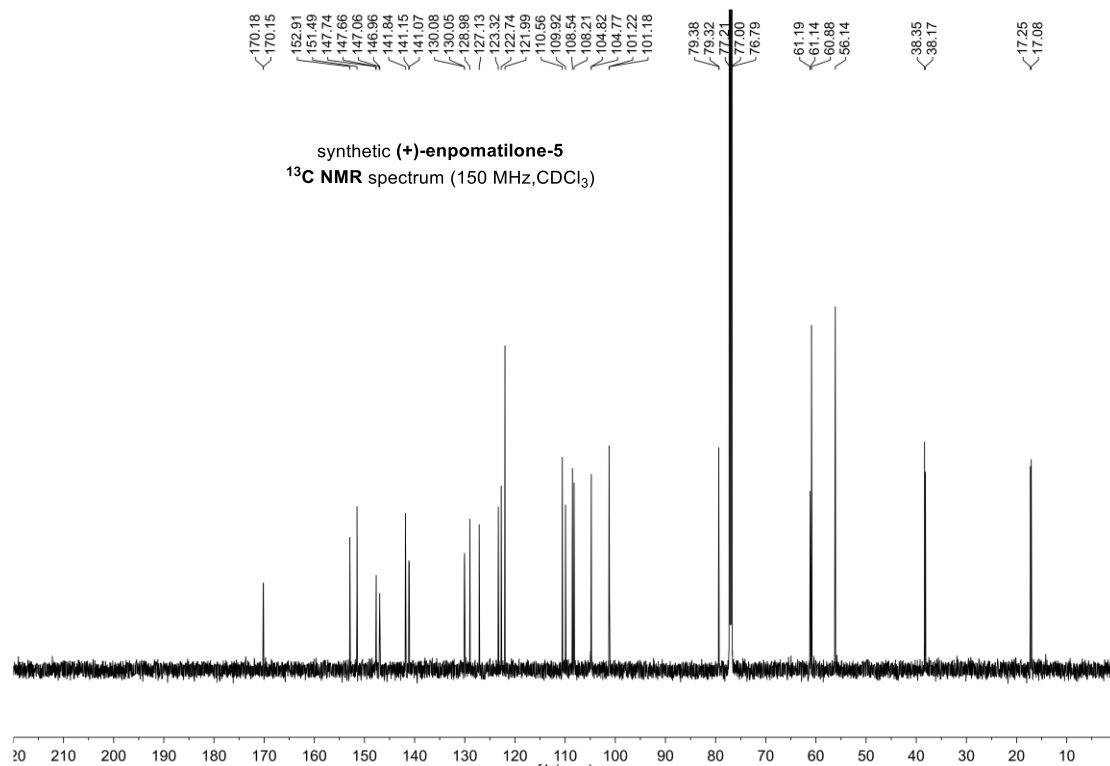

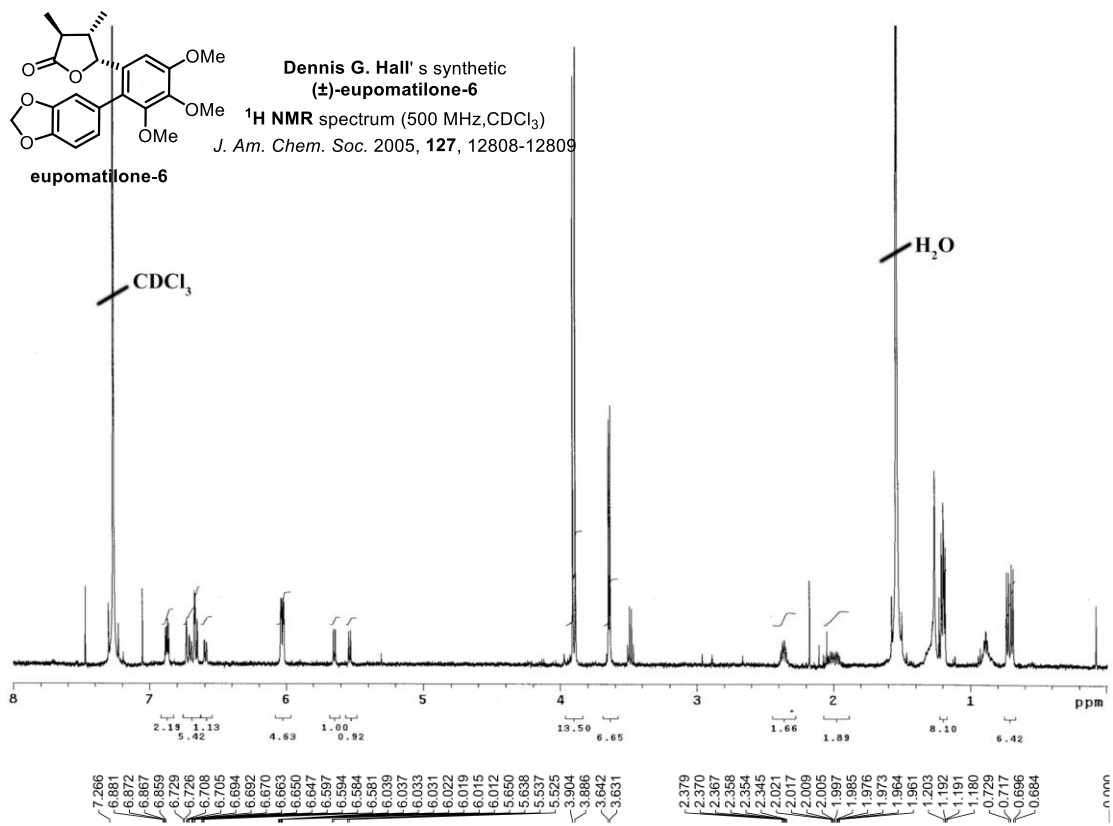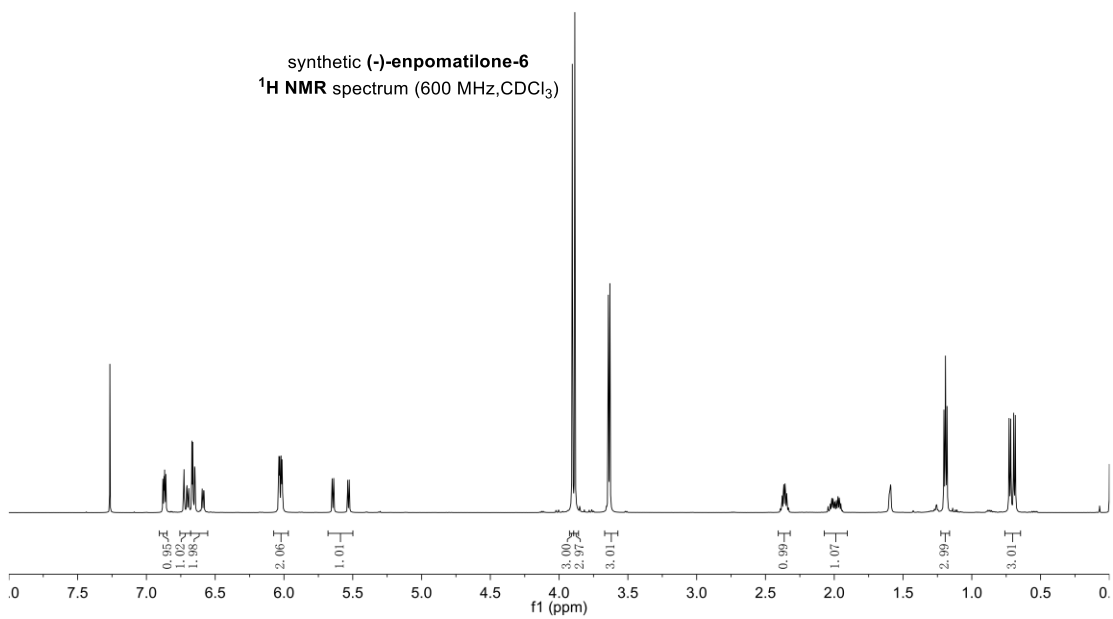

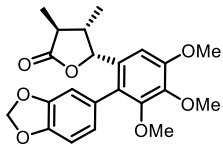

**eupomatilone-6**

Mukund K. Gurjar's synthetic  
 (-)-eupomatilone-6  
<sup>1</sup>H NMR spectrum (500 MHz, CDCl<sub>3</sub>)  
*J. Org. Chem.* 2005, **70**, 9658-9661

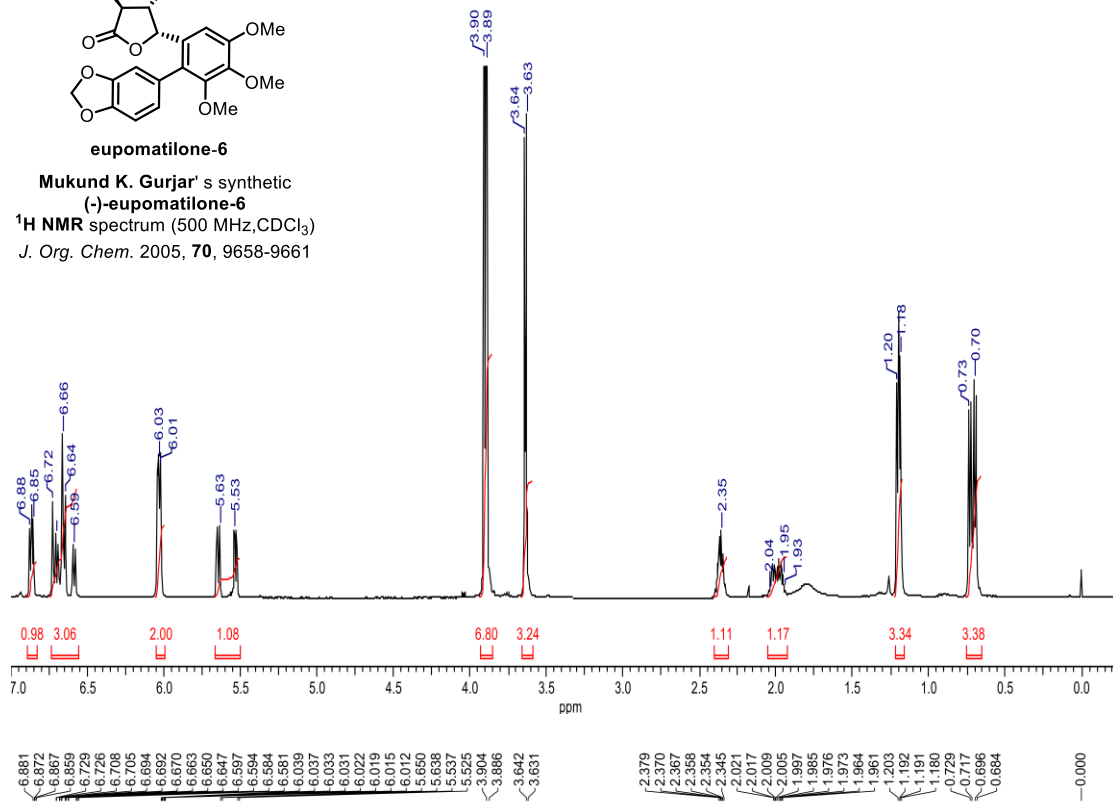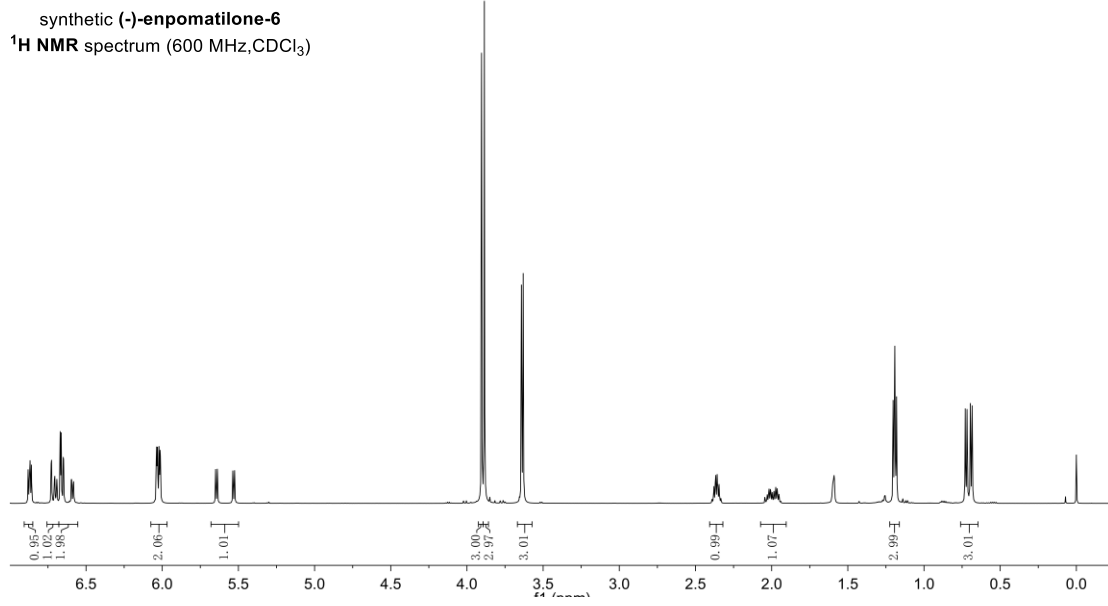

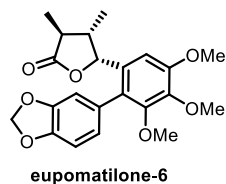

Mukund K. Gurjar's synthetic  
**(-)-eupomatilone-6**  
<sup>13</sup>C NMR spectrum (125 MHz, CDCl<sub>3</sub>)  
*J. Org. Chem.* 2005, **70**, 9658-9661

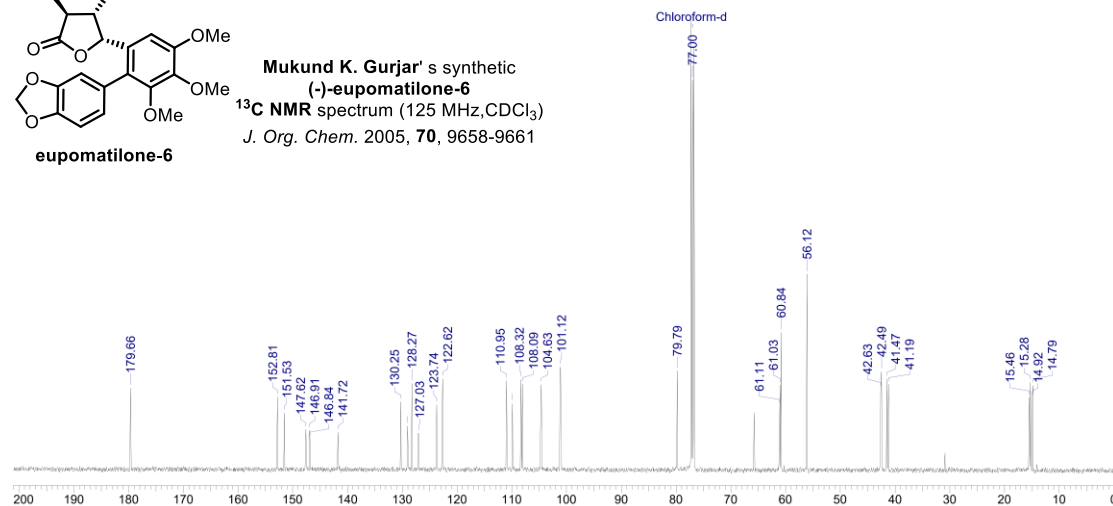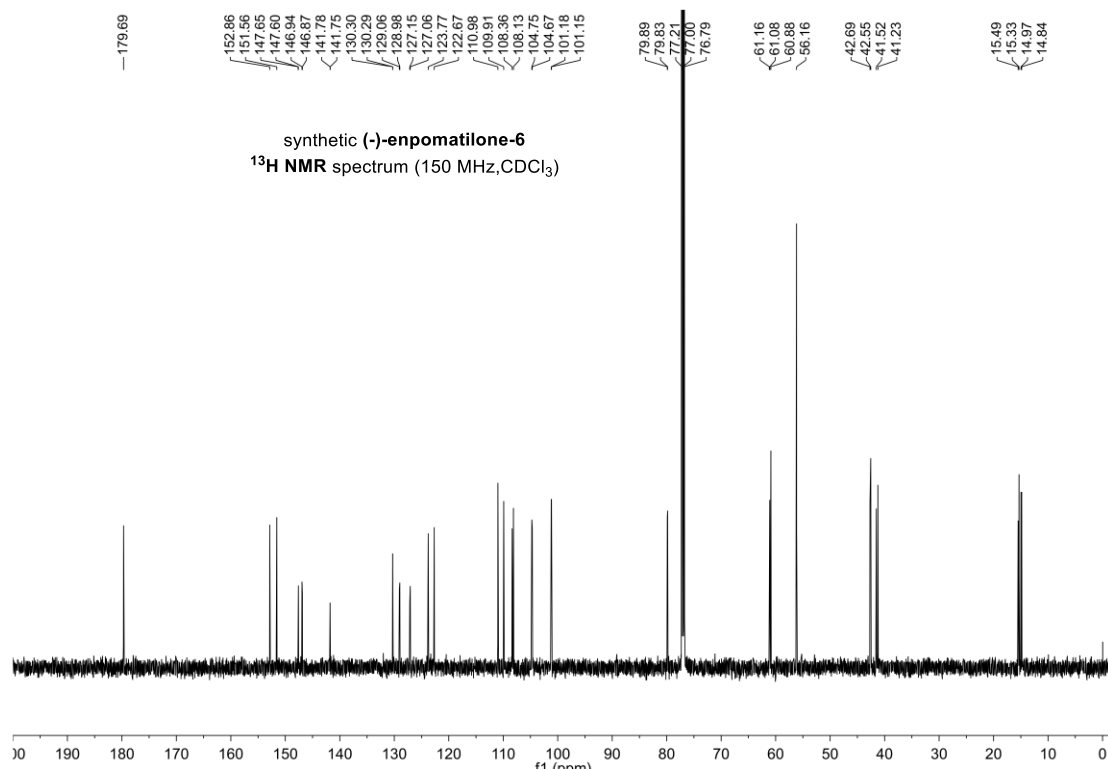

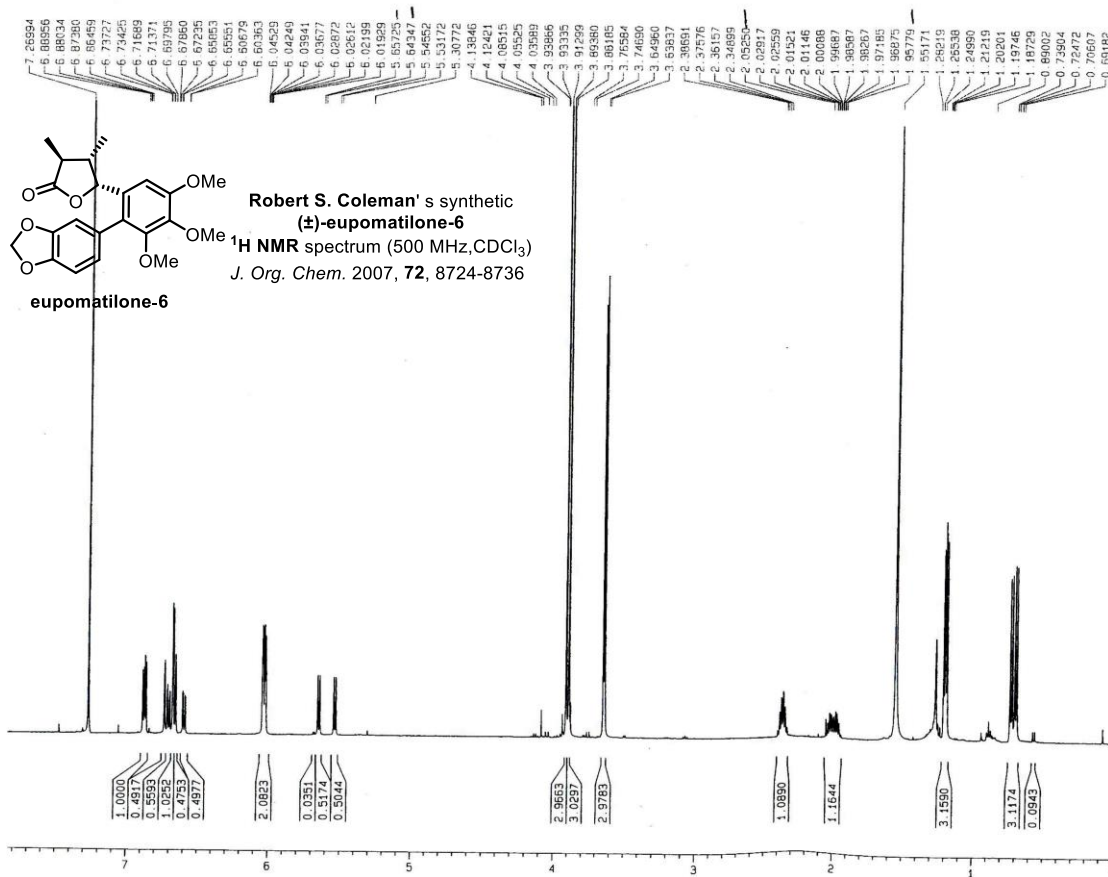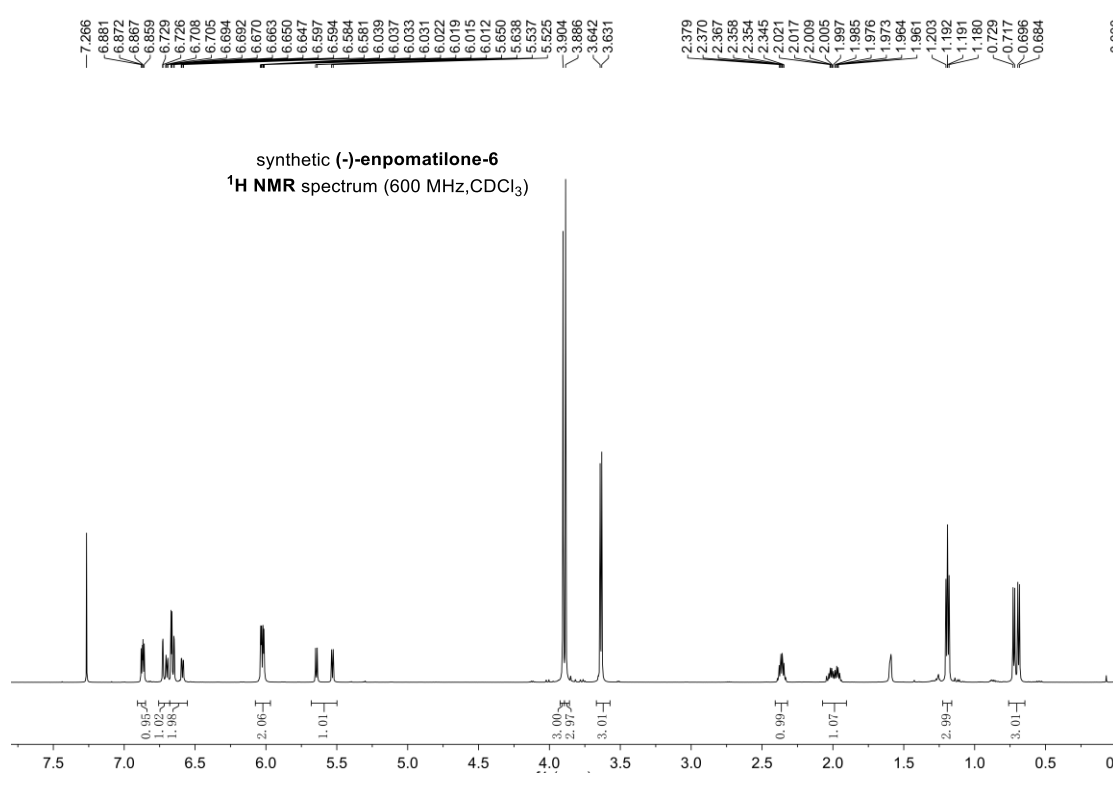

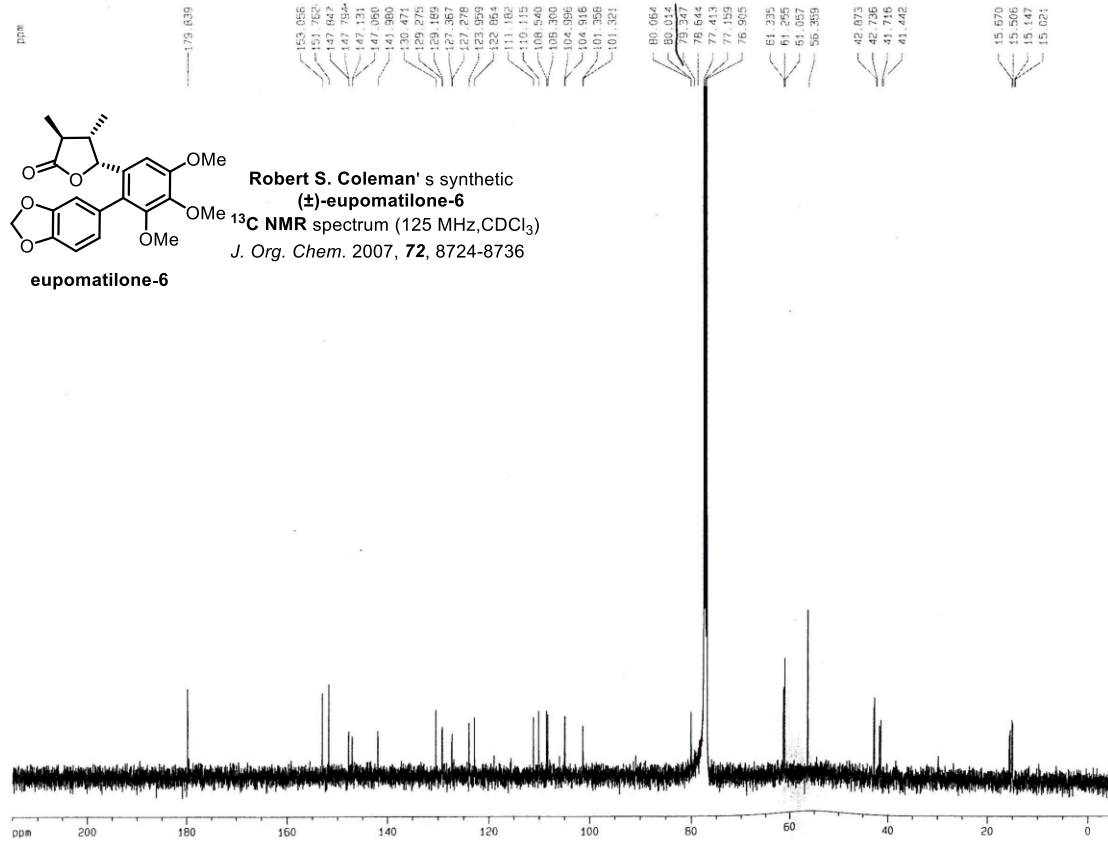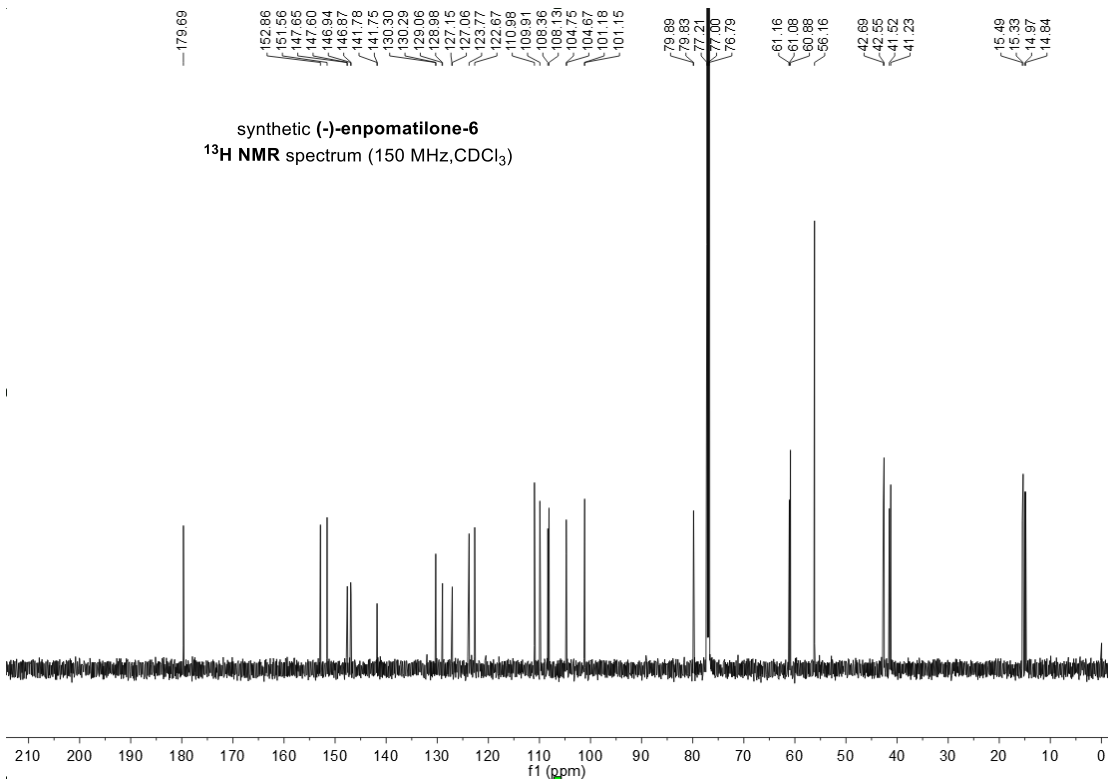



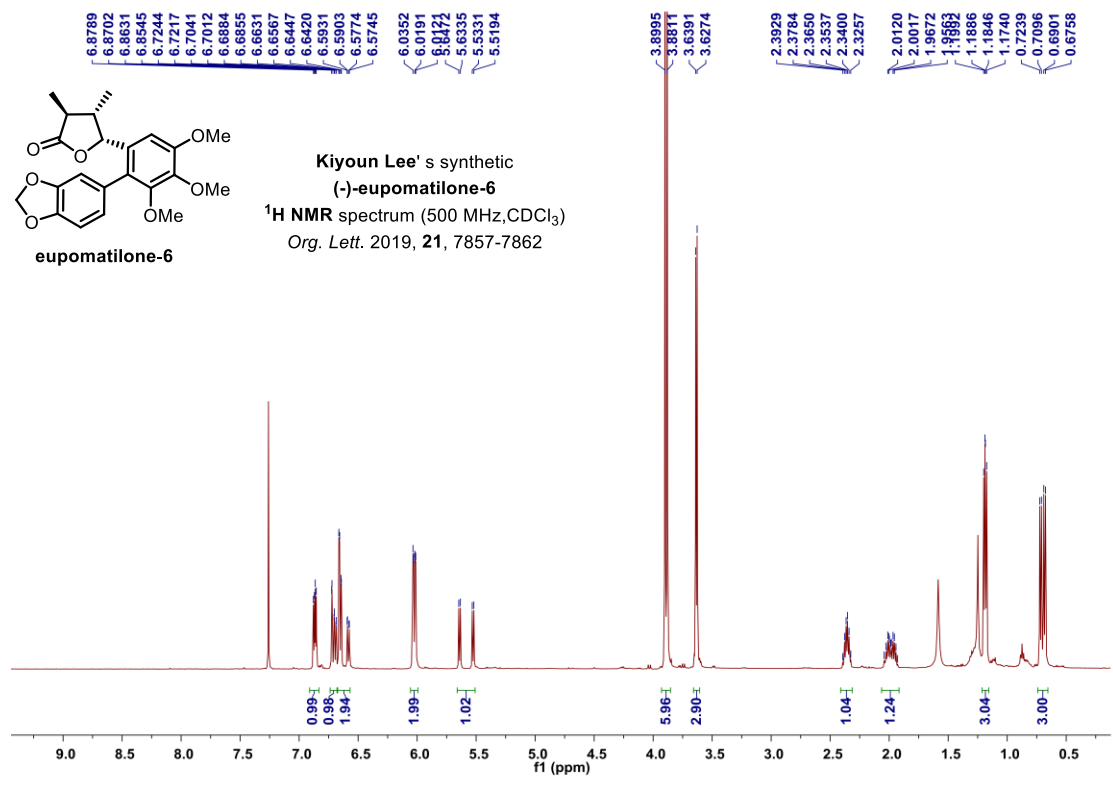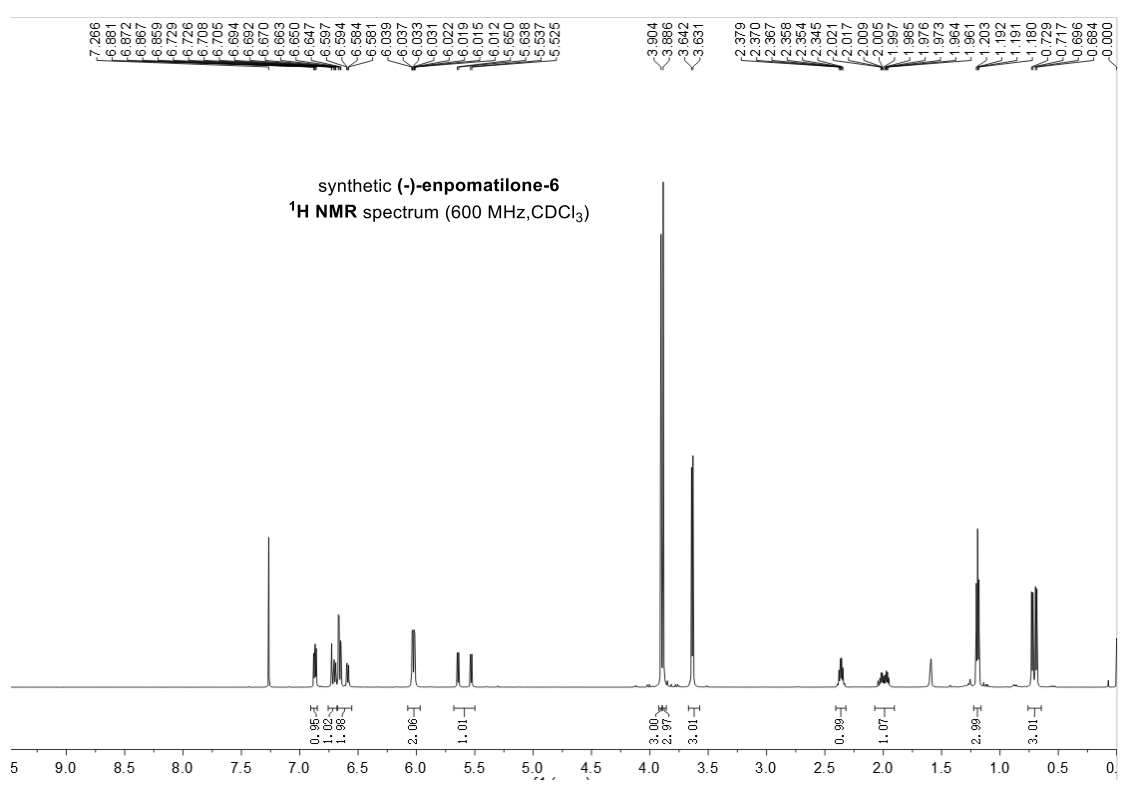

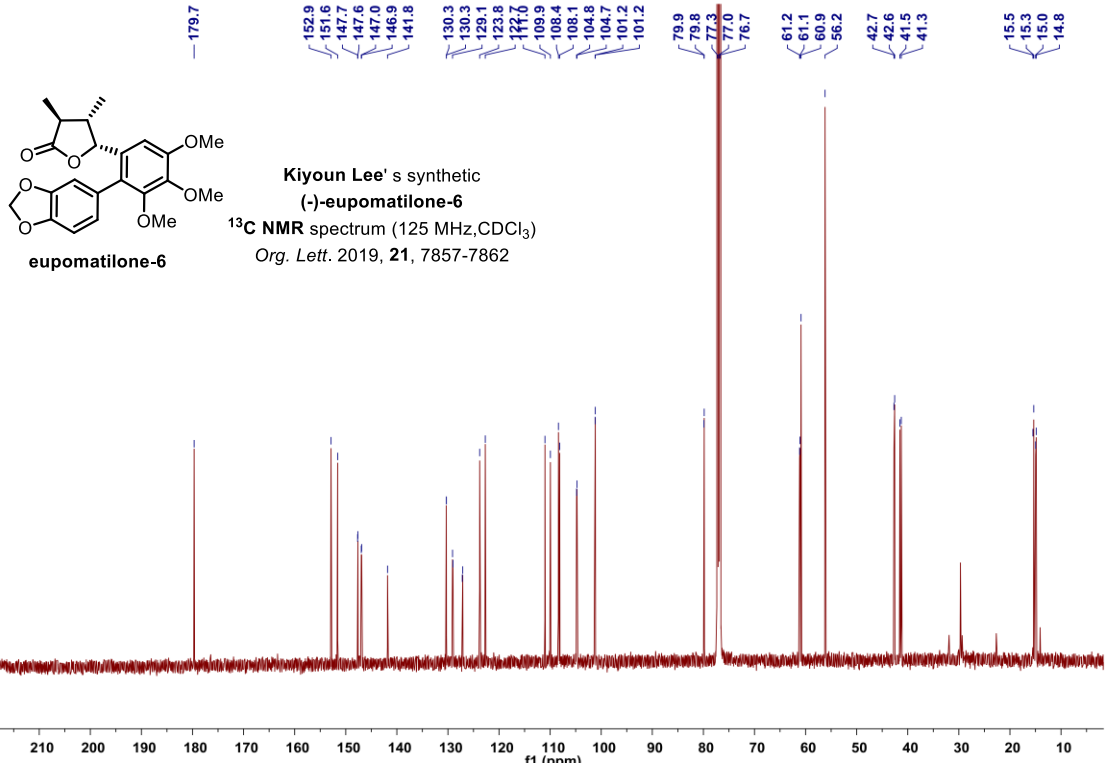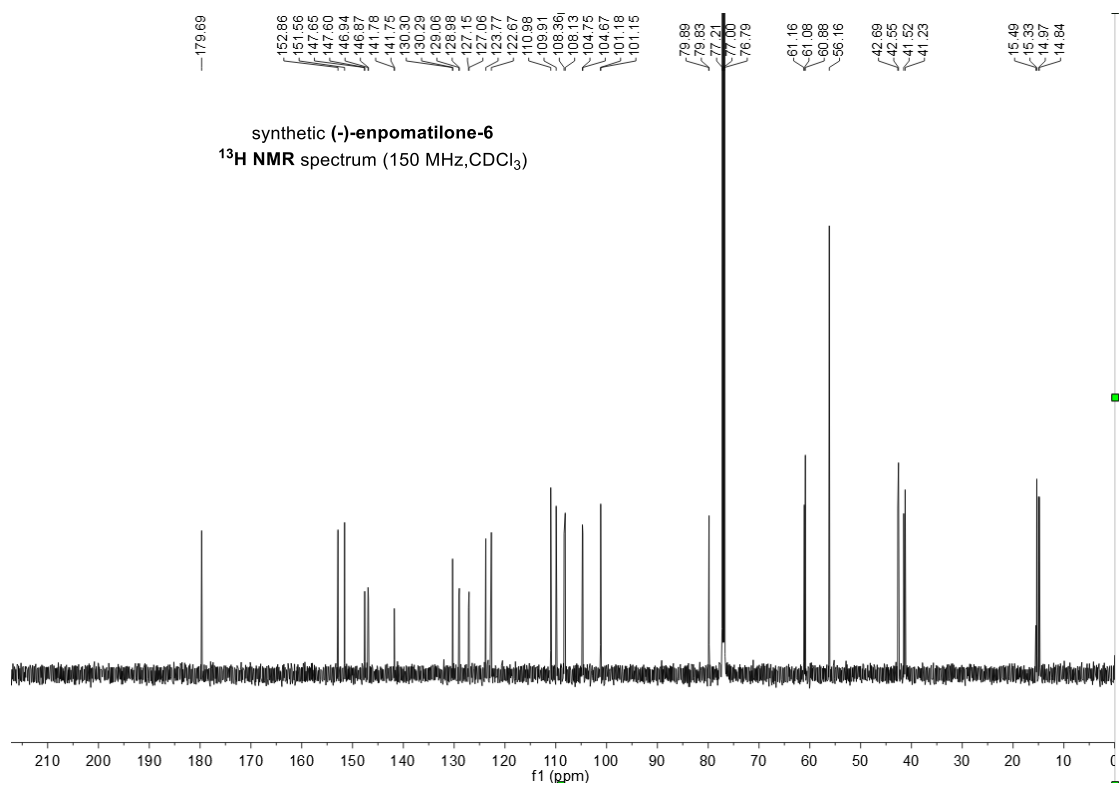

Supplement: d2sc02079c1.pdf [file d2sc02079c1.pdf]
